# Supplementary material for: Foxp3 depends on Ikaros for control of regulatory T cell gene expression and function
Source: eLife journal article supplement (doi:10.7554/elife.91392), 2023-11-13

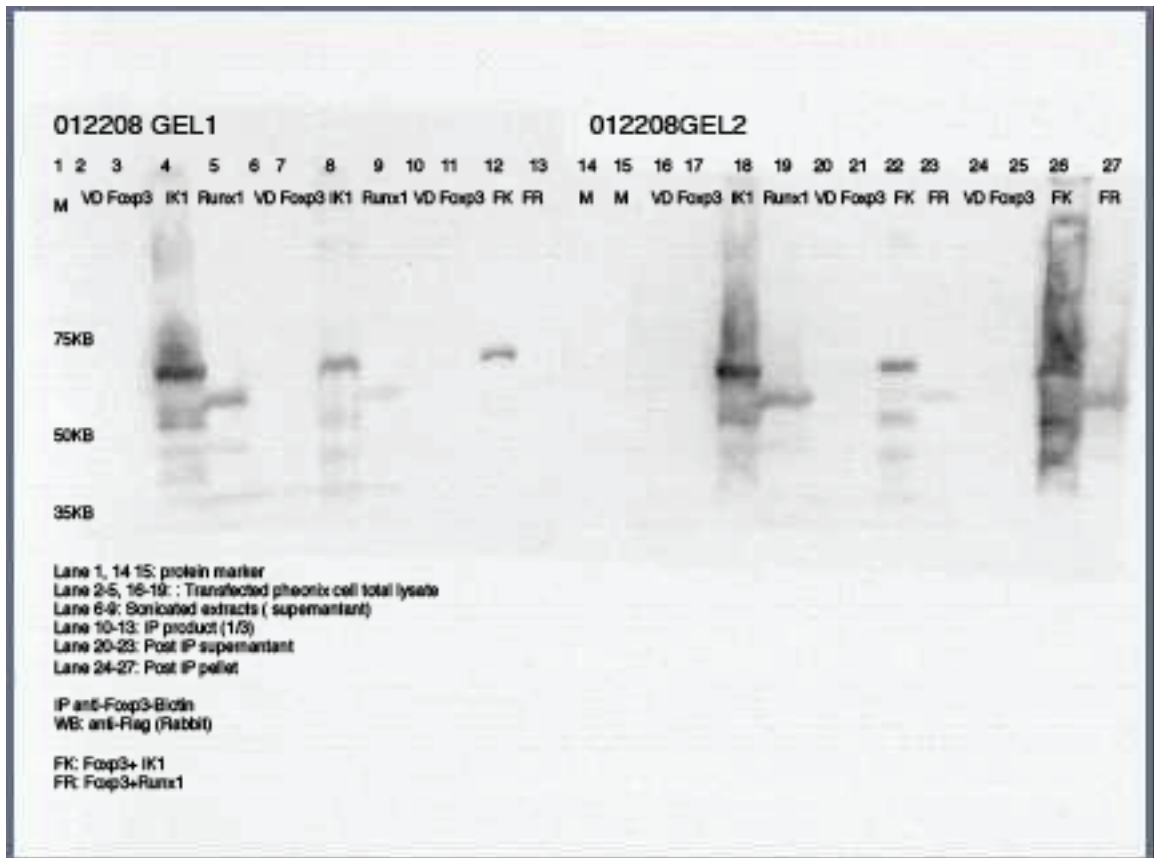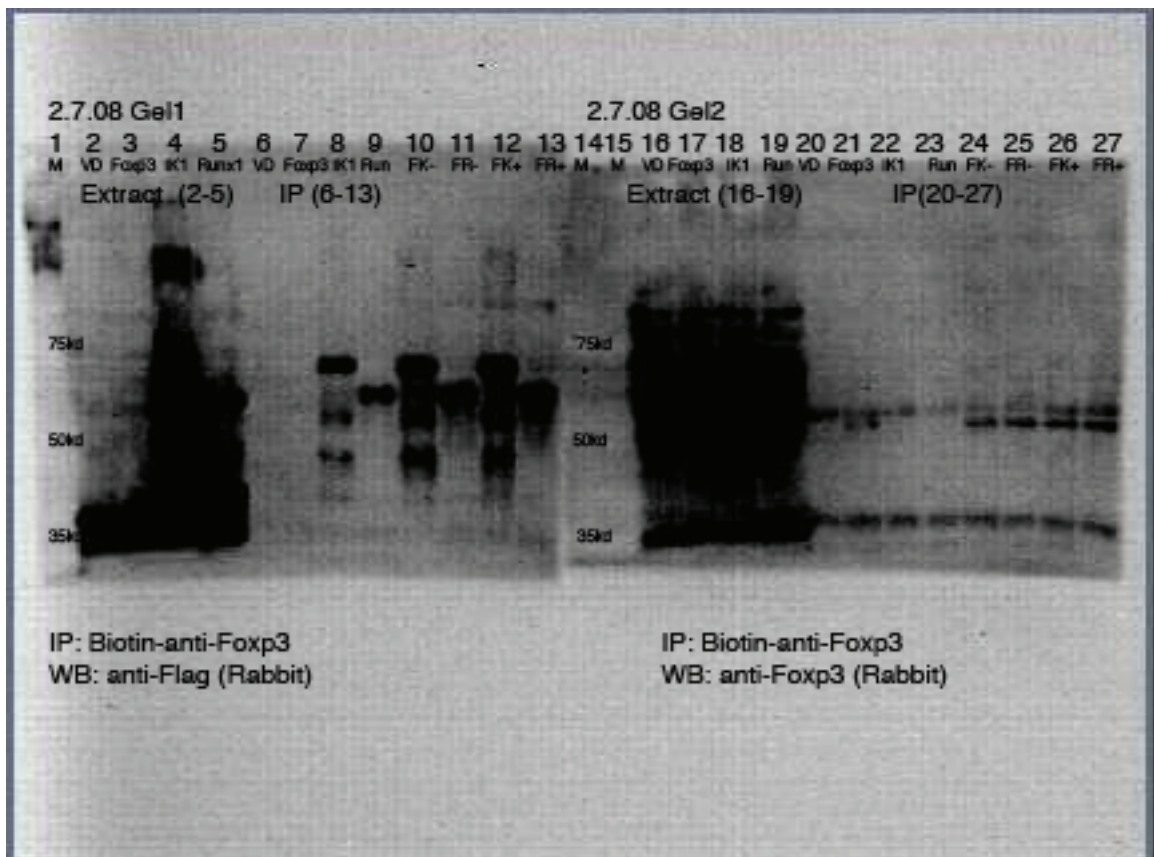

Supplement: fig6-data1 [file elife-91392-fig6-data1-v1.pdf]
