# Supplementary material for: Foxp3 depends on Ikaros for control of regulatory T cell gene expression and function
Source: eLife. 2024 Apr 24;12:RP91392. doi: 10.7554/eLife.91392 (PMC11042806; doi:10.7554/eLife.91392)
Supplement: Supplementary file 3. — Enrichment was determined using one-sided hypergeometric tests with FDR adjustment. [file elife-91392-supp3.xlsx]

## Sheet: MSigDB GO enrichment
Gene ontology of differentially expressed genes
Pathway	genes	geneset_direction	genes_observed	gene_expected	hyper_p.val	hyper_fdr
GO_RESPONSE_TO_CYTOKINE	Ebi3:Ifitm3:Ifitm2:Usp18:Gbp5:Cish:Gbp6:Gbp2:Irf8:Ifng:Il2:Il3:Il12rb2:Cxcl10:Lama5:Lta:Nfil3:Parp14:Axl:Ccl1:Ifih1:Stxbp1:Tnfsf11:Socs1:Socs2:Ina	up	26	6	2.00284e-12	1.47209e-08
GO_CYTOKINE_MEDIATED_SIGNALING_PATHWAY	Ebi3:Ifitm3:Ifitm2:Usp18:Cish:Gbp2:Irf8:Ifng:Il2:Il3:Il12rb2:Cxcl10:Lama5:Lta:Parp14:Axl:Ccl1:Tnfsf11:Socs1:Socs2	up	20	4	5.14822e-11	1.89197e-07
GO_RESPONSE_TO_INTERFERON_GAMMA	Ifitm3:Ifitm2:Gbp5:Gbp6:Gbp2:Irf8:Ifng:Parp14:Ccl1:Stxbp1:Socs1	up	11	1	1.19538e-10	2.92867e-07
GO_POSITIVE_REGULATION_OF_MULTICELLULAR_ORGANISMAL_PROCESS	Foxo6:Ebi3:Gbp5:Hbegf:Megf8:Ezh2:Gpld1:Gpm6b:Tbx21:Irf8:Ifng:Il2:Il12rb2:Loxl2:Lta:Mmp14:Axl:Ccl1:Ifih1:Bmpr2:Tpbg:Elovl6:Sema7a:Tnfsf11:Socs1:Socs2:Maged1	up	27	9	4.23596e-09	7.78358e-06
GO_INTERFERON_GAMMA_PRODUCTION	Ebi3:Irf8:Il2:Il12rb2:Lta:Axl:Prnp	up	7	1	4.4744e-08	6.57737e-05
GO_REGULATION_OF_IMMUNE_SYSTEM_PROCESS	Ebi3:Usp18:Gbp5:Gpld1:Tmem176b:Tbx21:Ifng:Il2:Cxcl10:Lta:Mmp14:Mov10:Parp14:Tmem176a:Axl:Prnp:Pros1:Ccl1:Ifih1:Stxbp1:Sema7a:Tnfsf11:Socs1	up	23	8	2.35393e-07	0.000288357
GO_POSITIVE_REGULATION_OF_REGULATORY_T_CELL_DIFFERENTIATION	Ifng:Il2:Socs1	up	3	1	4.27974e-07	0.000349512
GO_INTERLEUKIN_17_PRODUCTION	Ifng:Il2:Prnp:Ccl1	up	4	1	4.21988e-07	0.000349512
GO_CYTOKINE_PRODUCTION	Ebi3:Gbp5:Tbx21:Irf8:Ifng:Il2:Il12rb2:Lta:Axl:Prnp:Ccl1:Ifih1:Sema7a:Socs1:Ube2l6	up	15	4	3.70346e-07	0.000349512
GO_POSITIVE_REGULATION_OF_INTERFERON_GAMMA_PRODUCTION	Ebi3:Irf8:Il2:Il12rb2:Lta	up	5	1	5.226e-07	0.00035178
GO_REGULATION_OF_LEUKOCYTE_DIFFERENTIATION	Tmem176b:Tbx21:Ifng:Il2:Mmp14:Tmem176a:Axl:Tnfsf11:Socs1	up	9	2	5.26474e-07	0.00035178
GO_SOMATIC_DIVERSIFICATION_OF_T_CELL_RECEPTOR_GENES	Lef1:Tcf7	down	2	1	7.90976e-08	0.000581367
GO_GLYCOSPHINGOLIPID_BIOSYNTHETIC_PROCESS	B4galnt1:St8sia6:Ugcg	down	3	1	1.83051e-07	0.000672713
GO_POSITIVE_REGULATION_OF_IMMUNE_SYSTEM_PROCESS	Ebi3:Gbp5:Gpld1:Tbx21:Ifng:Il2:Cxcl10:Lta:Mmp14:Axl:Prnp:Pros1:Ccl1:Ifih1:Stxbp1:Sema7a:Tnfsf11:Socs1	up	18	6	1.30074e-06	0.000796706
GO_POSITIVE_REGULATION_OF_DEVELOPMENTAL_PROCESS	Foxo6:Megf8:Ezh2:Dkkl1:Gpm6b:Metrnl:Tbx21:Ifng:Il2:Loxl2:Lta:Mmp14:Axl:Bmpr2:Tpbg:Sema7a:Tnfsf11:Socs1:Socs2:Maged1	up	20	7	1.44236e-06	0.000815487
GO_REGULATION_OF_RESPONSE_TO_CYTOKINE_STIMULUS	Usp18:Ifng:Il3:Parp14:Axl:Ifih1:Socs1	up	7	1	1.65584e-06	0.000869315
GO_NEGATIVE_REGULATION_OF_DENDRITIC_CELL_DIFFERENTIATION	Tmem176b:Tmem176a	up	2	1	1.94783e-06	0.000931473
GO_RESPONSE_TO_INTERFERON_ALPHA	Ifitm3:Ifitm2:Axl	up	3	1	2.0277e-06	0.000931473
GO_DEFENSE_RESPONSE	Ifitm3:Ifitm2:Usp18:Gbp5:Gbp6:Gbp2:Metrnl:Irf8:Ifng:Il2:Cxcl10:Lta:Parp14:Axl:Ccl1:Rtp4:Ifih1:Stxbp1:Sema7a:Tnfsf11:Socs1:Tbkbp1	up	22	8	2.15716e-06	0.000932653
GO_REGULATION_OF_CD4_POSITIVE_ALPHA_BETA_T_CELL_DIFFERENTIATION	Tbx21:Ifng:Il2:Socs1	up	4	1	2.59124e-06	0.000966722
GO_TYROSINE_PHOSPHORYLATION_OF_STAT_PROTEIN	Ifng:Il2:Il3:Parp14:Socs1	up	5	1	2.63053e-06	0.000966722
GO_POSITIVE_REGULATION_OF_CELL_DIFFERENTIATION	Foxo6:Megf8:Ezh2:Dkkl1:Metrnl:Ifng:Il2:Loxl2:Lta:Mmp14:Axl:Bmpr2:Sema7a:Tnfsf11:Socs1:Socs2	up	16	5	2.42598e-06	0.000966722
GO_POSITIVE_REGULATION_OF_GRANULOCYTE_DIFFERENTIATION	Evi2b:Lef1	down	2	1	4.41075e-07	0.00108063
GO_REGULATION_OF_GROWTH	Cish:Hbegf:Megf8:Irf8:Ifng:Igfbp7:Il2:Lta:Mmp14:Bmpr2:Sema7a:Socs1:Socs2	up	13	4	3.31138e-06	0.00115898
GO_NEGATIVE_REGULATION_OF_ALPHA_BETA_T_CELL_DIFFERENTIATION	Tbx21:Il2:Socs1	up	3	1	4.38429e-06	0.00120915
GO_REGULATION_OF_ALPHA_BETA_T_CELL_ACTIVATION	Ebi3:Tbx21:Ifng:Il2:Socs1	up	5	1	4.4796e-06	0.00120915
GO_INTERFERON_GAMMA_MEDIATED_SIGNALING_PATHWAY	Gbp2:Irf8:Ifng:Parp14:Socs1	up	5	1	3.94049e-06	0.00120915
GO_POSITIVE_REGULATION_OF_LYMPHOCYTE_DIFFERENTIATION	Ifng:Il2:Mmp14:Axl:Socs1	up	5	1	4.7708e-06	0.00120915
GO_POSITIVE_REGULATION_OF_RECEPTOR_SIGNALING_PATHWAY_VIA_STAT	Ifng:Il2:Il3:Parp14:Socs1	up	5	1	4.4796e-06	0.00120915
GO_POSITIVE_REGULATION_OF_LEUKOCYTE_DIFFERENTIATION	Ifng:Il2:Mmp14:Axl:Tnfsf11:Socs1	up	6	1	4.70543e-06	0.00120915
GO_INSULIN_RECEPTOR_SIGNALING_PATHWAY	Foxo6:Cish:Rhoq:Gpld1:Socs1:Socs2	up	6	1	3.89905e-06	0.00120915
GO_REGULATION_OF_RECEPTOR_SIGNALING_PATHWAY_VIA_STAT	Ifng:Il2:Il3:Parp14:Socs1:Socs2	up	6	1	4.49187e-06	0.00120915
GO_NEUTROPHIL_DIFFERENTIATION	Evi2b:Lef1	down	2	1	6.60679e-07	0.001214
GO_REGULATION_OF_RESPONSE_TO_INTERFERON_GAMMA	Ifng:Parp14:Socs1	up	3	1	5.20087e-06	0.00123311
GO_NEGATIVE_REGULATION_OF_RECEPTOR_SIGNALING_PATHWAY_VIA_STAT	Parp14:Socs1:Socs2	up	3	1	5.20087e-06	0.00123311
GO_POSITIVE_REGULATION_OF_AXON_GUIDANCE	Megf8:Bmpr2	up	2	1	5.41718e-06	0.00124426
GO_RESPONSE_TO_TYPE_I_INTERFERON	Ifitm3:Ifitm2:Usp18:Gbp2:Irf8	up	5	1	5.73805e-06	0.00127802
GO_PEPTIDYL_TYROSINE_MODIFICATION	Hbegf:Ifng:Il2:Il3:Il12rb2:Parp14:Axl:Prnp:Socs1	up	9	2	6.72339e-06	0.00145344
GO_REGULATION_OF_CD4_POSITIVE_ALPHA_BETA_T_CELL_ACTIVATION	Tbx21:Ifng:Il2:Socs1	up	4	1	7.43542e-06	0.00151915
GO_POSITIVE_REGULATION_OF_CYTOKINE_PRODUCTION	Ebi3:Gbp5:Irf8:Ifng:Il2:Il12rb2:Lta:Ccl1:Ifih1:Sema7a	up	10	3	7.44074e-06	0.00151915
GO_NEGATIVE_REGULATION_OF_LEUKOCYTE_DIFFERENTIATION	Tmem176b:Tbx21:Il2:Tmem176a:Socs1	up	5	1	7.70013e-06	0.00152962
GO_NEGATIVE_REGULATION_OF_T_HELPER_17_CELL_DIFFERENTIATION	Tbx21:Il2	up	2	1	8.09835e-06	0.00156639
GO_POSITIVE_REGULATION_OF_PHOSPHORUS_METABOLIC_PROCESS	Rbpms:Hbegf:Ezh2:Gpld1:Ifng:Il2:Il3:Parp14:Prnp:Ccl1:Bmpr2:Arhgef5:Sema7a:Tnfsf11:Socs1:Maged1	up	16	6	8.71458e-06	0.0016013
GO_CELL_MOTILITY	Hbegf:Megf8:Tcte1:Gpld1:Tbx21:Ifng:Cxcl10:Rhoc:Lama5:Loxl2:Mmp14:Lima1:Axl:Pros1:Cd248:Ccl1:Bmpr2:Arhgef5:Hsd3b7:Sema7a:Tnfsf11	up	21	9	8.67256e-06	0.0016013
GO_POSITIVE_REGULATION_OF_ISOTYPE_SWITCHING_TO_IGG_ISOTYPES	Tbx21:Il2	up	2	1	1.153e-05	0.00180718
GO_INTERLEUKIN_7_MEDIATED_SIGNALING_PATHWAY	Cish:Socs1:Socs2	up	3	1	1.10687e-05	0.00180718
GO_REGULATION_OF_ALPHA_BETA_T_CELL_DIFFERENTIATION	Tbx21:Ifng:Il2:Socs1	up	4	1	1.11993e-05	0.00180718
GO_RECEPTOR_SIGNALING_PATHWAY_VIA_STAT	Ifng:Il2:Il3:Parp14:Socs1:Socs2	up	6	1	1.11203e-05	0.00180718
GO_REGULATION_OF_HEMOPOIESIS	Tmem176b:Tbx21:Ifng:Il2:Mmp14:Mov10:Tmem176a:Axl:Tnfsf11:Socs1	up	10	3	1.14324e-05	0.00180718
GO_INNATE_IMMUNE_RESPONSE	Ifitm3:Ifitm2:Usp18:Gbp5:Gbp6:Gbp2:Irf8:Ifng:Parp14:Axl:Ccl1:Ifih1:Stxbp1:Socs1:Tbkbp1	up	15	5	1.07115e-05	0.00180718
GO_GROWTH	Cish:Hbegf:Megf8:Ezh2:Gas1:Irf8:Ifng:Igfbp7:Il2:Lta:Mmp14:Bmpr2:Sema7a:Socs1:Socs2	up	15	5	1.15561e-05	0.00180718
GO_POSITIVE_REGULATION_OF_CELL_GROWTH	Hbegf:Megf8:Il2:Mmp14:Bmpr2:Sema7a	up	6	1	1.20403e-05	0.00184367
GO_GANGLIOSIDE_BIOSYNTHETIC_PROCESS	B4galnt1:St8sia6	down	2	1	1.2941e-06	0.00190233
GO_POSITIVE_REGULATION_OF_CELL_ACTIVATION	Ebi3:Tbx21:Ifng:Il2:Mmp14:Axl:Stxbp1:Tnfsf11:Socs1	up	9	2	1.32065e-05	0.00198097
GO_REGULATION_OF_LYMPHOCYTE_DIFFERENTIATION	Tbx21:Ifng:Il2:Mmp14:Axl:Socs1	up	6	1	1.3538e-05	0.00199008
GO_EPIBOLY	Hbegf:Megf8:Rhoc	up	3	1	1.44211e-05	0.00207834
GO_NEGATIVE_REGULATION_OF_TYROSINE_PHOSPHORYLATION_OF_STAT_PROTEIN	Parp14:Socs1	up	2	1	1.58003e-05	0.0021462
GO_INTERLEUKIN_35_MEDIATED_SIGNALING_PATHWAY	Ebi3:Il12rb2	up	2	1	1.58003e-05	0.0021462
GO_PROTEIN_ADP_RIBOSYLATION	Ifng:Parp14:Parp12	up	3	1	1.6352e-05	0.0021462
GO_REGULATORY_T_CELL_DIFFERENTIATION	Ifng:Il2:Socs1	up	3	1	1.6352e-05	0.0021462
GO_POSITIVE_REGULATION_OF_RESPONSE_TO_EXTERNAL_STIMULUS	Gbp5:Megf8:Il2:Cxcl10:Lta:Ccl1:Bmpr2:Tnfsf11	up	8	2	1.56441e-05	0.0021462
GO_REGULATION_OF_CELLULAR_RESPONSE_TO_INSULIN_STIMULUS	Cish:Gpld1:Socs1:Socs2	up	4	1	1.87975e-05	0.00242389
GO_V_D_J_RECOMBINATION	Lef1:Tcf7	down	2	1	2.23679e-06	0.00249861
GO_IMMUNE_SYSTEM_DEVELOPMENT	Bcl2l11:Ikzf1:Evi2b:Gpr171:Lef1:Bcl6:Tcf7:Lmo4:Cd27:Itm2a	down	10	2	2.37963e-06	0.00249861
GO_POSITIVE_REGULATION_OF_TYROSINE_PHOSPHORYLATION_OF_STAT_PROTEIN	Ifng:Il2:Il3:Parp14	up	4	1	2.01478e-05	0.00250994
GO_REGULATION_OF_SIGNALING_RECEPTOR_ACTIVITY	Ebi3:Hbegf:Dkkl1:Metrnl:Ifng:Il2:Il3:Cxcl10:Lta:Ccl1:Tnfsf11	up	11	3	1.99605e-05	0.00250994
GO_REGULATION_OF_DENDRITIC_CELL_DIFFERENTIATION	Tmem176b:Tmem176a	up	2	1	2.0996e-05	0.00257202
GO_G_PROTEIN_COUPLED_PURINERGIC_NUCLEOTIDE_RECEPTOR_SIGNALING_PATHWAY	Gpr34:Gpr171	down	2	1	2.84281e-06	0.00261183
GO_REGULATION_OF_PEPTIDYL_TYROSINE_PHOSPHORYLATION	Hbegf:Ifng:Il2:Il3:Parp14:Prnp:Socs1	up	7	2	2.18086e-05	0.00262776
GO_POSITIVE_REGULATION_OF_LYMPHOCYTE_ACTIVATION	Ebi3:Tbx21:Ifng:Il2:Mmp14:Axl:Tnfsf11:Socs1	up	8	2	2.26222e-05	0.00268183
GO_POSITIVE_REGULATION_OF_HEMOPOIESIS	Ifng:Il2:Mmp14:Axl:Tnfsf11:Socs1	up	6	1	2.35366e-05	0.00274594
GO_NEURON_PROJECTION_EXTENSION_INVOLVED_IN_NEURON_PROJECTION_GUIDANCE	Megf8:Bmpr2:Sema7a	up	3	1	2.60198e-05	0.00289766
GO_NEGATIVE_REGULATION_OF_CELLULAR_RESPONSE_TO_INSULIN_STIMULUS	Cish:Socs1:Socs2	up	3	1	2.60198e-05	0.00289766
GO_NEGATIVE_REGULATION_OF_ALPHA_BETA_T_CELL_ACTIVATION	Tbx21:Il2:Socs1	up	3	1	2.60198e-05	0.00289766
GO_REGULATION_OF_GRANULOCYTE_DIFFERENTIATION	Evi2b:Lef1	down	2	1	3.5485e-06	0.00289794
GO_POSITIVE_REGULATION_OF_PEPTIDYL_TYROSINE_PHOSPHORYLATION	Hbegf:Ifng:Il2:Il3:Parp14:Prnp	up	6	1	2.79852e-05	0.00307002
GO_REGULATION_OF_CELL_DIFFERENTIATION	Foxo6:Megf8:Ezh2:Dkkl1:Metrnl:Tmem176b:Tbx21:Ifng:Il2:Cxcl10:Loxl2:Lta:Mmp14:Mov10:Tmem176a:Axl:Bmpr2:Sema7a:Tnfsf11:Socs1:Socs2	up	21	9	3.07687e-05	0.00332573
GO_POSITIVE_REGULATION_OF_B_CELL_MEDIATED_IMMUNITY	Tbx21:Il2:Lta	up	3	1	3.21752e-05	0.00342736
GO_ISOTYPE_SWITCHING_TO_IGG_ISOTYPES	Tbx21:Il2	up	2	1	3.45051e-05	0.00362303
GO_POSITIVE_REGULATION_OF_AXON_EXTENSION	Megf8:Bmpr2:Sema7a	up	3	1	3.56235e-05	0.00363657
GO_RESPONSE_TO_INTERLEUKIN_7	Cish:Socs1:Socs2	up	3	1	3.56235e-05	0.00363657
GO_IMMUNE_SYSTEM_DEVELOPMENT	Tmem176b:Tbx21:Irf8:Ifng:Il2:Il3:Lta:Mmp14:Mov10:Tmem176a:Axl:Cd248:Tnfsf11:Socs1	up	14	5	3.86821e-05	0.0038947
GO_CERAMIDE_BIOSYNTHETIC_PROCESS	B4galnt1:St8sia6:Ugcg	down	3	1	5.85066e-06	0.0039093
GO_LYMPHOCYTE_DIFFERENTIATION	Ikzf1:Lef1:Bcl6:Tcf7:Cd27:Itm2a	down	6	1	5.67462e-06	0.0039093
GO_SOMATIC_DIVERSIFICATION_OF_IMMUNE_RECEPTORS_VIA_GERMLINE_RECOMBINATION_WITHIN_A_SINGLE_LOCUS	Lef1:Bcl6:Tcf7	down	3	1	6.70486e-06	0.00391226
GO_LEUKOCYTE_DIFFERENTIATION	Ikzf1:Evi2b:Lef1:Bcl6:Tcf7:Cd27:Itm2a	down	7	2	6.91965e-06	0.00391226
GO_ALPHA_BETA_T_CELL_ACTIVATION	Ebi3:Tbx21:Ifng:Il2:Socs1	up	5	1	4.0235e-05	0.00399631
GO_MODULATION_OF_GROWTH_OF_SYMBIONT_INVOLVED_IN_INTERACTION_WITH_HOST	Irf8:Lta	up	2	1	4.29859e-05	0.0040506
GO_POSITIVE_REGULATION_OF_INTERLEUKIN_17_PRODUCTION	Il2:Ccl1	up	2	1	4.29859e-05	0.0040506
GO_POSITIVE_REGULATION_OF_MEMBRANE_PROTEIN_ECTODOMAIN_PROTEOLYSIS	Gpld1:Ifng	up	2	1	4.29859e-05	0.0040506
GO_REGULATION_OF_INFLAMMATORY_RESPONSE	Usp18:Gbp5:Metrnl:Il2:Lta:Ccl1:Sema7a:Tnfsf11	up	8	2	4.19126e-05	0.0040506
GO_DENDRITIC_CELL_DIFFERENTIATION	Tmem176b:Tmem176a:Axl	up	3	1	4.75953e-05	0.00426616
GO_REGULATION_OF_AXON_GUIDANCE	Megf8:Bmpr2:Sema7a	up	3	1	4.75953e-05	0.00426616
GO_NEGATIVE_REGULATION_OF_T_CELL_DIFFERENTIATION	Tbx21:Il2:Socs1	up	3	1	4.75953e-05	0.00426616
GO_POSITIVE_REGULATION_OF_PROTEIN_METABOLIC_PROCESS	Ebi3:Rbpms:Rnf19b:Hbegf:Ezh2:Gpld1:Ifng:Il2:Il3:Mmp14:Parp14:Prnp:Ccl1:Bmpr2:Arhgef5:Sema7a:Tnfsf11:Socs1:Maged1	up	19	8	4.67074e-05	0.00426616
GO_REGULATION_OF_DEFENSE_RESPONSE	Usp18:Gbp5:Metrnl:Ifng:Il2:Lta:Parp14:Ccl1:Ifih1:Sema7a:Tnfsf11:Socs1	up	12	4	5.06177e-05	0.00448241
GO_NEGATIVE_REGULATION_OF_INTERLEUKIN_17_PRODUCTION	Ifng:Prnp	up	2	1	5.27275e-05	0.00455938
GO_NEGATIVE_REGULATION_OF_T_HELPER_CELL_DIFFERENTIATION	Tbx21:Il2	up	2	1	5.27275e-05	0.00455938
GO_CD4_POSITIVE_ALPHA_BETA_T_CELL_ACTIVATION	Tbx21:Ifng:Il2:Socs1	up	4	1	5.39361e-05	0.00460966
GO_NEGATIVE_REGULATION_OF_RHO_PROTEIN_SIGNAL_TRANSDUCTION	Stmn1:Bcl6	down	2	1	1.02851e-05	0.00473671
GO_GLYCOLIPID_BIOSYNTHETIC_PROCESS	B4galnt1:St8sia6:Ugcg	down	3	1	9.24146e-06	0.00473671
GO_POSITIVE_REGULATION_OF_LEUKOCYTE_DIFFERENTIATION	Evi2b:Lef1:Bcl6:Cd27	down	4	1	1.03112e-05	0.00473671
GO_NEGATIVE_REGULATION_OF_LYMPHOCYTE_ACTIVATION	Tbx21:Il2:Axl:Prnp:Socs1	up	5	1	5.77289e-05	0.0048771
GO_LOCOMOTION	Hbegf:Megf8:Tcte1:Gpld1:Tbx21:Ifng:Cxcl10:Rhoc:Lama5:Loxl2:Mmp14:Lima1:Axl:Pros1:Cd248:Ccl1:Bmpr2:Arhgef5:Hsd3b7:Sema7a:Tnfsf11	up	21	10	5.85373e-05	0.00488919
GO_PURINERGIC_NUCLEOTIDE_RECEPTOR_SIGNALING_PATHWAY	Gpr34:Gpr171	down	2	1	1.18923e-05	0.00508582
GO_SOMATIC_DIVERSIFICATION_OF_IMMUNE_RECEPTORS	Lef1:Bcl6:Tcf7	down	3	1	1.3147e-05	0.00508582
GO_LYMPHOCYTE_APOPTOTIC_PROCESS	Bcl2l11:Bcl6:Cd27	down	3	1	1.3147e-05	0.00508582
GO_CELLULAR_RESPONSE_TO_INSULIN_STIMULUS	Foxo6:Cish:Rhoq:Gpld1:Socs1:Socs2	up	6	1	6.19029e-05	0.0051122
GO_LYMPH_NODE_DEVELOPMENT	Lta:Cd248	up	2	1	6.38105e-05	0.00515392
GO_CHONDROCYTE_PROLIFERATION	Mmp14:Bmpr2	up	2	1	6.38105e-05	0.00515392
GO_POSITIVE_REGULATION_OF_INFLAMMATORY_RESPONSE	Gbp5:Il2:Lta:Ccl1:Tnfsf11	up	5	1	6.47506e-05	0.00517301
GO_POSITIVE_REGULATION_OF_IMMUNE_EFFECTOR_PROCESS	Tbx21:Ifng:Il2:Lta:Stxbp1:Sema7a	up	6	2	6.56573e-05	0.00518904
GO_G_PROTEIN_COUPLED_PURINERGIC_RECEPTOR_SIGNALING_PATHWAY	Gpr34:Gpr171	down	2	1	1.55858e-05	0.00520709
GO_APOPTOTIC_PROCESS_INVOLVED_IN_MORPHOGENESIS	Bcl2l11:Lef1	down	2	1	1.55858e-05	0.00520709
GO_B_CELL_APOPTOTIC_PROCESS	Bcl2l11:Bcl6	down	2	1	1.55858e-05	0.00520709
GO_CRANIOFACIAL_SUTURE_MORPHOGENESIS	Megf8:Mmp14	up	2	1	7.63146e-05	0.00526085
GO_POSITIVE_REGULATION_OF_MONOCYTE_CHEMOTAXIS	Cxcl10:Ccl1	up	2	1	7.63146e-05	0.00526085
GO_GROWTH_INVOLVED_IN_SYMBIOTIC_INTERACTION	Irf8:Lta	up	2	1	7.63146e-05	0.00526085
GO_MAMMARY_GLAND_ALVEOLUS_DEVELOPMENT	Tnfsf11:Socs2	up	2	1	7.63146e-05	0.00526085
GO_REGULATION_OF_STEROID_BIOSYNTHETIC_PROCESS	Dkkl1:Ifng:Igfbp7:Elovl6	up	4	1	7.8106e-05	0.00526085
GO_REGULATION_OF_PROTEIN_LOCALIZATION_TO_PLASMA_MEMBRANE	Rhoq:Ifng:Mmp14:Prnp	up	4	1	7.42215e-05	0.00526085
GO_REGULATION_OF_LIPID_METABOLIC_PROCESS	Cish:Dkkl1:Gpld1:Ifng:Igfbp7:Elovl6:Socs1:Socs2	up	8	2	7.36347e-05	0.00526085
GO_CELL_GROWTH	Cish:Hbegf:Megf8:Igfbp7:Il2:Mmp14:Bmpr2:Sema7a:Socs2	up	9	3	7.31846e-05	0.00526085
GO_REGULATION_OF_LYMPHOCYTE_ACTIVATION	Ebi3:Tbx21:Ifng:Il2:Mmp14:Axl:Prnp:Tnfsf11:Socs1	up	9	3	7.5776e-05	0.00526085
GO_POSITIVE_REGULATION_OF_LOCOMOTION	Hbegf:Megf8:Gpld1:Ifng:Cxcl10:Rhoc:Mmp14:Ccl1:Bmpr2:Sema7a	up	10	3	7.81421e-05	0.00526085
GO_REGULATION_OF_CELL_ADHESION	Ebi3:Gpm6b:Tbx21:Ifng:Il2:Lama5:Mmp14:Pcdh8:Prnp:Tnfsf11:Socs1	up	11	4	7.59792e-05	0.00526085
GO_REGULATION_OF_RESPONSE_TO_EXTERNAL_STIMULUS	Usp18:Gbp5:Megf8:Metrnl:Il2:Cxcl10:Lta:Pros1:Ccl1:Bmpr2:Sema7a:Tnfsf11	up	12	4	6.84944e-05	0.00526085
GO_RESPONSE_TO_BIOTIC_STIMULUS	Ifitm3:Ifitm2:Gbp5:Gbp6:Tbx21:Irf8:Ifng:Il12rb2:Cxcl10:Lta:Axl:Rtp4:Ifih1:Ms4a1	up	14	5	6.92876e-05	0.00526085
GO_NEGATIVE_REGULATION_OF_MULTICELLULAR_ORGANISMAL_PROCESS	Tmem176b:Tbx21:Ifng:Il2:Cxcl10:Loxl2:Tmem176a:Axl:Prnp:Pros1:Ifih1:Bmpr2:Sema7a:Socs1:Socs2:Ube2l6	up	16	7	7.87338e-05	0.00526085
GO_BIOLOGICAL_ADHESION	Ebi3:Ctnnd1:Gpm6b:Tbx21:Ifng:Igfbp7:Il2:Lama5:Loxl2:Mmp14:Pcdh8:Axl:Prnp:Stxbp1:Tpbg:Tnfsf11:Socs1	up	17	7	7.64611e-05	0.00526085
GO_REGULATION_OF_PHOSPHORUS_METABOLIC_PROCESS	Rbpms:Cish:Hbegf:Ezh2:Gpld1:Ifng:Il2:Il3:Cxcl10:Parp14:Prnp:Ccl1:Bmpr2:Arhgef5:Sema7a:Tnfsf11:Socs1:Socs2:Maged1	up	19	8	7.82525e-05	0.00526085
GO_POSITIVE_REGULATION_OF_SIGNALING	Rbpms:Hbegf:Ezh2:Gpld1:Ifng:Il2:Il3:Rhoc:Parp14:Axl:Prnp:Ccl1:Bmpr2:Stxbp1:Arhgef5:Sema7a:Tnfsf11:Socs1:Socs2:Maged1	up	20	9	7.34956e-05	0.00526085
GO_NEGATIVE_REGULATION_OF_HEMOPOIESIS	Tmem176b:Tbx21:Il2:Tmem176a:Socs1	up	5	1	8.38053e-05	0.00554927
GO_PHOSPHATIDYLINOSITOL_PHOSPHORYLATION	Cish:Socs1:Socs2	up	3	1	8.66406e-05	0.00568579
GO_NEGATIVE_REGULATION_OF_VIRAL_ENTRY_INTO_HOST_CELL	Ifitm3:Ifitm2	up	2	1	9.03184e-05	0.00587469
GO_REGULATION_OF_CELL_CELL_ADHESION	Ebi3:Tbx21:Ifng:Il2:Pcdh8:Prnp:Tnfsf11:Socs1	up	8	2	9.68227e-05	0.00624252
GO_NEGATIVE_REGULATION_OF_LYMPHOCYTE_DIFFERENTIATION	Tbx21:Il2:Socs1	up	3	1	0.000101129	0.00646346
GO_NEGATIVE_REGULATION_OF_CD4_POSITIVE_ALPHA_BETA_T_CELL_DIFFERENTIATION	Tbx21:Il2	up	2	1	0.000105899	0.00662308
GO_REGULATION_OF_T_HELPER_17_TYPE_IMMUNE_RESPONSE	Tbx21:Il2	up	2	1	0.000105899	0.00662308
GO_REGULATION_OF_T_CELL_ACTIVATION	Ebi3:Tbx21:Ifng:Il2:Prnp:Tnfsf11:Socs1	up	7	2	0.00010633	0.00662308
GO_ALPHA_BETA_T_CELL_DIFFERENTIATION	Tbx21:Ifng:Il2:Socs1	up	4	1	0.00010987	0.00678606
GO_REGULATION_OF_B_CELL_MEDIATED_IMMUNITY	Tbx21:Il2:Lta	up	3	1	0.0001173	0.00718466
GO_REGULATION_OF_CELL_ACTIVATION	Ebi3:Tbx21:Ifng:Il2:Mmp14:Axl:Prnp:Stxbp1:Tnfsf11:Socs1	up	10	3	0.000118647	0.00720705
GO_MORPHOGENESIS_OF_AN_EPITHELIAL_SHEET	Hbegf:Megf8:Rhoc	up	3	1	0.000126053	0.00741845
GO_POSITIVE_REGULATION_OF_RESPONSE_TO_CYTOKINE_STIMULUS	Parp14:Axl:Ifih1	up	3	1	0.000126053	0.00741845
GO_PHOSPHATIDYLINOSITOL_METABOLIC_PROCESS	Cish:Gpld1:Socs1:Socs2	up	4	1	0.000126174	0.00741845
GO_DEFENSE_RESPONSE_TO_VIRUS	Ifitm3:Ifitm2:Ifng:Cxcl10:Rtp4:Ifih1	up	6	2	0.000127173	0.00741845
GO_LEUKOCYTE_DIFFERENTIATION	Tmem176b:Tbx21:Ifng:Il2:Mmp14:Tmem176a:Axl:Tnfsf11:Socs1	up	9	3	0.000125098	0.00741845
GO_RESPONSE_TO_VIRUS	Ifitm3:Ifitm2:Tbx21:Ifng:Cxcl10:Rtp4:Ifih1	up	7	2	0.000132079	0.00764393
GO_LYMPHOCYTE_MIGRATION	Tbx21:Cxcl10:Ccl1:Hsd3b7	up	4	1	0.000138032	0.00792603
GO_NEGATIVE_REGULATION_OF_ACTIN_FILAMENT_BUNDLE_ASSEMBLY	S1pr1:Stmn1	down	2	1	2.5085e-05	0.00801629
GO_POSITIVE_REGULATION_OF_PROTEIN_MODIFICATION_PROCESS	Rbpms:Hbegf:Ezh2:Ifng:Il2:Il3:Parp14:Prnp:Ccl1:Bmpr2:Arhgef5:Sema7a:Tnfsf11:Socs1:Maged1	up	15	6	0.000144168	0.0082142
GO_REGULATION_OF_IMMUNE_RESPONSE	Usp18:Gbp5:Gpld1:Tbx21:Ifng:Il2:Lta:Parp14:Prnp:Pros1:Ifih1:Stxbp1:Sema7a:Socs1	up	14	6	0.000146499	0.00828281
GO_TISSUE_REMODELING	Il2:Mmp14:Axl:Bmpr2:Tnfsf11	up	5	1	0.000153784	0.00862837
GO_GROWTH_INVOLVED_IN_HEART_MORPHOGENESIS	S1pr1	down	1	1	4.07713e-05	0.00871168
GO_REGULATION_OF_MAST_CELL_CYTOKINE_PRODUCTION	Bcl6	down	1	1	4.07713e-05	0.00871168
GO_NEGATIVE_REGULATION_OF_ISOTYPE_SWITCHING	Bcl6	down	1	1	4.07713e-05	0.00871168
GO_MODULATION_BY_SYMBIONT_OF_HOST_APOPTOTIC_PROCESS	Bcl2l11	down	1	1	4.07713e-05	0.00871168
GO_NEGATIVE_REGULATION_OF_APOPTOTIC_PROCESS_IN_BONE_MARROW_CELL	Lef1	down	1	1	4.07713e-05	0.00871168
GO_NEGATIVE_REGULATION_OF_GUANYL_NUCLEOTIDE_EXCHANGE_FACTOR_ACTIVITY	Stmn1	down	1	1	4.07713e-05	0.00871168
GO_NEGATIVE_REGULATION_OF_LYMPHOCYTE_APOPTOTIC_PROCESS	Bcl6:Cd27	down	2	1	3.77661e-05	0.00871168
GO_GRANULOCYTE_DIFFERENTIATION	Evi2b:Lef1	down	2	1	4.14842e-05	0.00871168
GO_BETA_CATENIN_TCF_COMPLEX_ASSEMBLY	Lef1:Tcf7	down	2	1	3.10007e-05	0.00871168
GO_PURINERGIC_RECEPTOR_SIGNALING_PATHWAY	Gpr34:Gpr171	down	2	1	3.77661e-05	0.00871168
GO_POSITIVE_REGULATION_OF_CYTOSOLIC_CALCIUM_ION_CONCENTRATION_INVOLVED_IN_PHOSPHOLIPASE_C_ACTIVATING_G_PROTEIN_COUPLED_SIGNALING_PATHWAY	S1pr1:Gpr174	down	2	1	3.42738e-05	0.00871168
GO_POSITIVE_REGULATION_OF_HEMOPOIESIS	Evi2b:Lef1:Bcl6:Cd27	down	4	1	3.38864e-05	0.00871168
GO_REGULATION_OF_MEMBRANE_PROTEIN_ECTODOMAIN_PROTEOLYSIS	Gpld1:Ifng	up	2	1	0.000162859	0.00893295
GO_NEGATIVE_REGULATION_OF_INTERLEUKIN_2_PRODUCTION	Tbx21:Prnp	up	2	1	0.000162859	0.00893295
GO_POSITIVE_REGULATION_OF_MONONUCLEAR_CELL_MIGRATION	Cxcl10:Ccl1	up	2	1	0.000162859	0.00893295
GO_REGULATION_OF_PROTEIN_LOCALIZATION_TO_CELL_PERIPHERY	Rhoq:Ifng:Mmp14:Prnp	up	4	1	0.000171417	0.00933272
GO_LEUKOCYTE_CELL_CELL_ADHESION	Ebi3:Tbx21:Ifng:Il2:Prnp:Tnfsf11:Socs1	up	7	2	0.000173064	0.00935308
GO_PROTEIN_LOCALIZATION_TO_PLASMA_MEMBRANE	Rhoq:Ifng:Lama5:Mmp14:Prnp:Stxbp1	up	6	2	0.000176332	0.00946016
GO_NEGATIVE_REGULATION_OF_INTERLEUKIN_4_PRODUCTION	Lef1	down	1	1	6.1078e-05	0.00997607
GO_NEGATIVE_REGULATION_OF_AMYLOID_PRECURSOR_PROTEIN_BIOSYNTHETIC_PROCESS	Itm2a	down	1	1	6.1078e-05	0.00997607
GO_MODULATION_OF_PROGRAMMED_CELL_DEATH_IN_OTHER_ORGANISM	Bcl2l11	down	1	1	6.1078e-05	0.00997607
GO_PARAXIAL_MESODERM_FORMATION	Lef1	down	1	1	6.1078e-05	0.00997607
GO_POSITIVE_REGULATION_OF_MUCUS_SECRETION	Sytl2	down	1	1	6.1078e-05	0.00997607
GO_ODONTOBLAST_DIFFERENTIATION	Lef1	down	1	1	6.1078e-05	0.00997607
GO_RESPONSE_TO_INTERLEUKIN_4	Lef1:Tcf7	down	2	1	4.96242e-05	0.00997607
GO_APOPTOTIC_PROCESS_INVOLVED_IN_DEVELOPMENT	Bcl2l11:Lef1	down	2	1	5.87463e-05	0.00997607
GO_ALPHA_BETA_T_CELL_DIFFERENTIATION	Lef1:Bcl6:Tcf7	down	3	1	5.28799e-05	0.00997607
GO_SPHINGOLIPID_BIOSYNTHETIC_PROCESS	B4galnt1:St8sia6:Ugcg	down	3	1	5.49581e-05	0.00997607
GO_POSITIVE_REGULATION_OF_NERVOUS_SYSTEM_DEVELOPMENT	Foxo6:Megf8:Ezh2:Il2:Lta:Bmpr2:Tpbg:Sema7a:Socs2	up	9	3	0.00018766	0.00999496
GO_T_CELL_HOMEOSTASIS	Bcl2l11:Gpr174	down	2	1	6.36918e-05	0.0101768
GO_CD4_POSITIVE_CD25_POSITIVE_ALPHA_BETA_REGULATORY_T_CELL_DIFFERENTIATION	Ifng	up	1	1	0.000213797	0.010204
GO_POSITIVE_REGULATION_OF_HUMORAL_IMMUNE_RESPONSE_MEDIATED_BY_CIRCULATING_IMMUNOGLOBULIN	Lta	up	1	1	0.000213797	0.010204
GO_TRICUSPID_VALVE_MORPHOGENESIS	Bmpr2	up	1	1	0.000213797	0.010204
GO_PEPTIDYL_LYSINE_OXIDATION	Loxl2	up	1	1	0.000213797	0.010204
GO_TRANSPOSITION_RNA_MEDIATED	Mov10	up	1	1	0.000213797	0.010204
GO_POSITIVE_REGULATION_OF_INTERLEUKIN_23_PRODUCTION	Ifng	up	1	1	0.000213797	0.010204
GO_INTERFERON_BETA_SECRETION	Ifih1	up	1	1	0.000213797	0.010204
GO_TOOTH_ERUPTION	Tnfsf11	up	1	1	0.000213797	0.010204
GO_RESPONSE_TO_CORTISOL	Igfbp7	up	1	1	0.000213797	0.010204
GO_RETINAL_BIPOLAR_NEURON_DIFFERENTIATION	Irx5	up	1	1	0.000213797	0.010204
GO_NEUTROPHIL_CLEARANCE	Axl	up	1	1	0.000213797	0.010204
GO_POSITIVE_REGULATION_OF_OSTEOCLAST_DEVELOPMENT	Tnfsf11	up	1	1	0.000213797	0.010204
GO_POSITIVE_REGULATION_OF_OSTEOCLAST_DIFFERENTIATION	Ifng:Tnfsf11	up	2	1	0.000210085	0.010204
GO_REGULATION_OF_MONOCYTE_CHEMOTAXIS	Cxcl10:Ccl1	up	2	1	0.000210085	0.010204
GO_LYMPHOCYTE_CHEMOTAXIS	Cxcl10:Ccl1:Hsd3b7	up	3	1	0.000201127	0.010204
GO_POSITIVE_REGULATION_OF_ALPHA_BETA_T_CELL_ACTIVATION	Ebi3:Ifng:Socs1	up	3	1	0.000201127	0.010204
GO_LEUKOCYTE_APOPTOTIC_PROCESS	Bcl2l11:Bcl6:Cd27	down	3	1	6.62553e-05	0.0103612
GO_POSITIVE_REGULATION_OF_CELL_DEVELOPMENT	Foxo6:Megf8:Ezh2:Il2:Lta:Bmpr2:Sema7a:Tnfsf11:Socs2	up	9	3	0.000221141	0.0104863
GO_REGULATION_OF_LIPID_KINASE_ACTIVITY	Cish:Socs1:Socs2	up	3	1	0.000227463	0.0105814
GO_LIPID_PHOSPHORYLATION	Cish:Socs1:Socs2	up	3	1	0.000227463	0.0105814
GO_MONOCYTE_CHEMOTAXIS	Cxcl10:Ccl1:Tnfsf11	up	3	1	0.000227463	0.0105814
GO_PYRIMIDINE_NUCLEOTIDE_METABOLIC_PROCESS	Dck	down	1	1	8.53988e-05	0.0108221
GO_FOREBRAIN_RADIAL_GLIAL_CELL_DIFFERENTIATION	Lef1	down	1	1	8.53988e-05	0.0108221
GO_NEGATIVE_REGULATION_OF_INTERLEUKIN_13_PRODUCTION	Lef1	down	1	1	8.53988e-05	0.0108221
GO_NEGATIVE_REGULATION_OF_INTERLEUKIN_5_PRODUCTION	Lef1	down	1	1	8.53988e-05	0.0108221
GO_MAST_CELL_CYTOKINE_PRODUCTION	Bcl6	down	1	1	8.53988e-05	0.0108221
GO_REGULATION_OF_ISOTYPE_SWITCHING_TO_IGE_ISOTYPES	Bcl6	down	1	1	8.53988e-05	0.0108221
GO_CHORIO_ALLANTOIC_FUSION	Lef1	down	1	1	8.53988e-05	0.0108221
GO_APOPTOTIC_PROCESS_IN_BONE_MARROW_CELL	Lef1	down	1	1	8.53988e-05	0.0108221
GO_POSITIVE_REGULATION_OF_IRE1_MEDIATED_UNFOLDED_PROTEIN_RESPONSE	Bcl2l11	down	1	1	8.53988e-05	0.0108221
GO_REGULATION_OF_GUANYL_NUCLEOTIDE_EXCHANGE_FACTOR_ACTIVITY	Stmn1	down	1	1	8.53988e-05	0.0108221
GO_STEM_CELL_DIVISION	Evi2b:Lef1	down	2	1	8.01435e-05	0.0108221
GO_REGULATION_OF_LIPID_BIOSYNTHETIC_PROCESS	Dkkl1:Gpld1:Ifng:Igfbp7:Elovl6	up	5	1	0.000249045	0.0115125
GO_T_CELL_DIFFERENTIATION_INVOLVED_IN_IMMUNE_RESPONSE	Tbx21:Ifng:Il2	up	3	1	0.000256196	0.0116237
GO_REGULATION_OF_PROTEIN_MATURATION	Gas1:Mmp14:Prnp	up	3	1	0.000256196	0.0116237
GO_DEFENSE_RESPONSE_TO_OTHER_ORGANISM	Ifitm3:Ifitm2:Gbp6:Irf8:Ifng:Cxcl10:Lta:Rtp4:Ifih1	up	9	3	0.00025581	0.0116237
GO_REGULATION_OF_HORMONE_BIOSYNTHETIC_PROCESS	Dkkl1:Ifng	up	2	1	0.000265379	0.0117231
GO_NEGATIVE_REGULATION_OF_CD4_POSITIVE_ALPHA_BETA_T_CELL_ACTIVATION	Tbx21:Il2	up	2	1	0.000265379	0.0117231
GO_POSITIVE_REGULATION_OF_ISOTYPE_SWITCHING	Tbx21:Il2	up	2	1	0.000265379	0.0117231
GO_REGULATION_OF_STEROID_METABOLIC_PROCESS	Dkkl1:Ifng:Igfbp7:Elovl6	up	4	1	0.000266362	0.0117231
GO_RESPONSE_TO_INSULIN	Foxo6:Cish:Rhoq:Gpld1:Socs1:Socs2	up	6	2	0.000262757	0.0117231
GO_TRICUSPID_VALVE_DEVELOPMENT	Bmpr2	up	1	1	0.000319722	0.0117893
GO_DETECTION_OF_VIRUS	Ifih1	up	1	1	0.000319722	0.0117893
GO_POSITIVE_REGULATION_OF_ALKALINE_PHOSPHATASE_ACTIVITY	Gpld1	up	1	1	0.000319722	0.0117893
GO_REGULATION_OF_SYNAPTIC_VESICLE_PRIMING	Stxbp1	up	1	1	0.000319722	0.0117893
GO_REGULATION_OF_LUNG_BLOOD_PRESSURE	Bmpr2	up	1	1	0.000319722	0.0117893
GO_ISG15_PROTEIN_CONJUGATION	Ube2l6	up	1	1	0.000319722	0.0117893
GO_NEGATIVE_REGULATION_OF_SYNAPTIC_TRANSMISSION_GABAERGIC	Stxbp1	up	1	1	0.000319722	0.0117893
GO_POSITIVE_REGULATION_OF_HOMOTYPIC_CELL_CELL_ADHESION	Tnfsf11	up	1	1	0.000319722	0.0117893
GO_HEMATOPOIETIC_STEM_CELL_MIGRATION	Gpld1	up	1	1	0.000319722	0.0117893
GO_REGULATION_OF_CD8_POSITIVE_ALPHA_BETA_T_CELL_DIFFERENTIATION	Socs1	up	1	1	0.000319722	0.0117893
GO_POSITIVE_REGULATION_OF_PINOCYTOSIS	Axl	up	1	1	0.000319722	0.0117893
GO_NEGATIVE_REGULATION_OF_NEUROTRANSMITTER_UPTAKE	Gpm6b	up	1	1	0.000319722	0.0117893
GO_SEROTONIN_UPTAKE	Gpm6b	up	1	1	0.000319722	0.0117893
GO_CILIARY_NEUROTROPHIC_FACTOR_MEDIATED_SIGNALING_PATHWAY	Ebi3	up	1	1	0.000319722	0.0117893
GO_INTERLEUKIN_17_SECRETION	Ccl1	up	1	1	0.000319722	0.0117893
GO_PRESYNAPTIC_DENSE_CORE_VESICLE_EXOCYTOSIS	Stxbp1	up	1	1	0.000319722	0.0117893
GO_REGULATION_OF_ENDOTHELIAL_TUBE_MORPHOGENESIS	Cxcl10	up	1	1	0.000319722	0.0117893
GO_REGULATION_OF_T_HELPER_17_CELL_LINEAGE_COMMITMENT	Tbx21	up	1	1	0.000319722	0.0117893
GO_NEGATIVE_REGULATION_OF_CD8_POSITIVE_ALPHA_BETA_T_CELL_ACTIVATION	Socs1	up	1	1	0.000319722	0.0117893
GO_PROTEIN_KINASE_C_ACTIVATING_G_PROTEIN_COUPLED_RECEPTOR_SIGNALING_PATHWAY	Cish:Il2	up	2	1	0.000296225	0.0117893
GO_T_HELPER_17_TYPE_IMMUNE_RESPONSE	Tbx21:Il2	up	2	1	0.000296225	0.0117893
GO_REGULATION_OF_PHOSPHOLIPID_METABOLIC_PROCESS	Cish:Socs1:Socs2	up	3	1	0.000271499	0.0117893
GO_POSITIVE_REGULATION_OF_DENDRITE_DEVELOPMENT	Foxo6:Ezh2:Il2	up	3	1	0.00030406	0.0117893
GO_CRANIAL_SKELETAL_SYSTEM_DEVELOPMENT	Irx5:Megf8:Mmp14	up	3	1	0.000271499	0.0117893
GO_NEGATIVE_REGULATION_OF_LEUKOCYTE_CELL_CELL_ADHESION	Tbx21:Il2:Prnp:Socs1	up	4	1	0.000320796	0.0117893
GO_STEROID_BIOSYNTHETIC_PROCESS	Dkkl1:Ifng:Igfbp7:Elovl6:Hsd3b7	up	5	1	0.000303087	0.0117893
GO_NEGATIVE_REGULATION_OF_CELL_ACTIVATION	Tbx21:Il2:Axl:Prnp:Socs1	up	5	1	0.000311505	0.0117893
GO_POSITIVE_REGULATION_OF_GROWTH	Hbegf:Megf8:Il2:Mmp14:Bmpr2:Sema7a	up	6	2	0.000274843	0.0117893
GO_NEGATIVE_REGULATION_OF_CYTOKINE_PRODUCTION	Tbx21:Ifng:Axl:Prnp:Ifih1:Ube2l6	up	6	2	0.00030036	0.0117893
GO_POSITIVE_REGULATION_OF_NEURON_PROJECTION_DEVELOPMENT	Foxo6:Megf8:Ezh2:Il2:Bmpr2:Sema7a	up	6	2	0.000287373	0.0117893
GO_POSITIVE_REGULATION_OF_NEURON_DIFFERENTIATION	Foxo6:Megf8:Ezh2:Il2:Bmpr2:Sema7a:Socs2	up	7	2	0.000303019	0.0117893
GO_AMEBOIDAL_TYPE_CELL_MIGRATION	Hbegf:Megf8:Gpld1:Ifng:Lama5:Loxl2:Bmpr2:Sema7a	up	8	3	0.000295844	0.0117893
GO_NEGATIVE_REGULATION_OF_IMMUNE_SYSTEM_PROCESS	Tmem176b:Tbx21:Il2:Parp14:Tmem176a:Axl:Prnp:Socs1	up	8	3	0.000281984	0.0117893
GO_RESPONSE_TO_INTERFERON_BETA	Ifitm3:Ifitm2	up	2	1	0.000329294	0.0120413
GO_REGULATION_OF_HYDROGEN_PEROXIDE_METABOLIC_PROCESS	Noxa1	down	1	1	0.000113718	0.0121134
GO_BLOOD_VESSEL_MATURATION	S1pr1	down	1	1	0.000113718	0.0121134
GO_FOREBRAIN_NEUROBLAST_DIVISION	Lef1	down	1	1	0.000113718	0.0121134
GO_GLYCOSYLCERAMIDE_BIOSYNTHETIC_PROCESS	Ugcg	down	1	1	0.000113718	0.0121134
GO_POST_EMBRYONIC_ANIMAL_ORGAN_MORPHOGENESIS	Bcl2l11	down	1	1	0.000113718	0.0121134
GO_HINDGUT_DEVELOPMENT	Tcf7	down	1	1	0.000113718	0.0121134
GO_POSITIVE_REGULATION_OF_CELL_PROLIFERATION_IN_BONE_MARROW	Lef1	down	1	1	0.000113718	0.0121134
GO_POSITIVE_REGULATION_OF_AXON_GUIDANCE	Tubb2b	down	1	1	0.000113718	0.0121134
GO_THYMUS_DEVELOPMENT	Bcl2l11:Lmo4	down	2	1	0.000113324	0.0121134
GO_DEVELOPMENTAL_PIGMENTATION	Bcl2l11:Lef1	down	2	1	0.000106083	0.0121134
GO_T_CELL_DIFFERENTIATION	Lef1:Bcl6:Tcf7:Cd27	down	4	1	0.000110949	0.0121134
GO_REGULATION_OF_VIRAL_ENTRY_INTO_HOST_CELL	Ifitm3:Ifitm2	up	2	1	0.000364652	0.0132029
GO_POSITIVE_REGULATION_OF_CELL_PROJECTION_ORGANIZATION	Foxo6:Megf8:Ezh2:Rhoq:Il2:Bmpr2:Sema7a	up	7	2	0.000363058	0.0132029
GO_POSITIVE_REGULATION_OF_CHEMOTAXIS	Megf8:Cxcl10:Ccl1:Bmpr2	up	4	1	0.0003701	0.0133345
GO_RESPONSE_TO_AMINO_ACID_STARVATION	Sesn1:Dapl1	down	2	1	0.000128758	0.0133407
GO_B_CELL_DIFFERENTIATION	Bcl6:Cd27:Itm2a	down	3	1	0.00012887	0.0133407
GO_REGULATION_OF_GERMINAL_CENTER_FORMATION	Bcl6	down	1	1	0.00014602	0.0134156
GO_EYE_PIGMENTATION	Lef1	down	1	1	0.00014602	0.0134156
GO_PARAXIAL_MESODERM_MORPHOGENESIS	Lef1	down	1	1	0.00014602	0.0134156
GO_REGULATION_OF_MUCUS_SECRETION	Sytl2	down	1	1	0.00014602	0.0134156
GO_IMMUNOLOGICAL_MEMORY_FORMATION_PROCESS	Bcl6	down	1	1	0.00014602	0.0134156
GO_NEGATIVE_REGULATION_OF_LEUKOCYTE_APOPTOTIC_PROCESS	Bcl6:Cd27	down	2	1	0.000145499	0.0134156
GO_LIPOSACCHARIDE_METABOLIC_PROCESS	B4galnt1:Ugcg	down	2	1	0.000145499	0.0134156
GO_T_CELL_APOPTOTIC_PROCESS	Bcl2l11:Cd27	down	2	1	0.000136962	0.0134156
GO_HOMEOSTASIS_OF_NUMBER_OF_CELLS	Bcl2l11:Ikzf1:Bcl6:Gpr174	down	4	1	0.000142788	0.0134156
GO_MYELOID_LEUKOCYTE_MIGRATION	Cxcl10:Mmp14:Ccl1:Arhgef5:Tnfsf11	up	5	1	0.000375696	0.0134701
GO_CELLULAR_RESPONSE_TO_PEPTIDE	Foxo6:Cish:Rhoq:Gpld1:Prnp:Socs1:Socs2	up	7	2	0.000382853	0.01366
GO_POSITIVE_REGULATION_OF_LEUKOCYTE_MEDIATED_IMMUNITY	Tbx21:Il2:Lta:Stxbp1	up	4	1	0.000396801	0.0140893
GO_NEGATIVE_REGULATION_OF_PROTEIN_MATURATION	Gas1:Prnp	up	2	1	0.000402365	0.0142182
GO_ENTRY_INTO_OTHER_ORGANISM_INVOLVED_IN_SYMBIOTIC_INTERACTION	Ifitm3:Ifitm2:Ctnnd1:Axl	up	4	1	0.000410685	0.0144428
GO_ANATOMICAL_STRUCTURE_REGRESSION	Lef1	down	1	1	0.00018229	0.0144705
GO_SPHINGOSINE_1_PHOSPHATE_RECEPTOR_SIGNALING_PATHWAY	S1pr1	down	1	1	0.00018229	0.0144705
GO_HINDBRAIN_RADIAL_GLIA_GUIDED_CELL_MIGRATION	Lef1	down	1	1	0.00018229	0.0144705
GO_POSITIVE_REGULATION_OF_PROTEIN_HOMOOLIGOMERIZATION	Bcl2l11	down	1	1	0.00018229	0.0144705
GO_CELLULAR_RESPONSE_TO_LEUCINE	Sesn1	down	1	1	0.00018229	0.0144705
GO_POSITIVE_REGULATION_OF_ENDOPLASMIC_RETICULUM_STRESS_INDUCED_INTRINSIC_APOPTOTIC_SIGNALING_PATHWAY	Bcl2l11	down	1	1	0.00018229	0.0144705
GO_CELLULAR_RESPONSE_TO_LEUCINE_STARVATION	Sesn1	down	1	1	0.00018229	0.0144705
GO_REGULATION_OF_STEM_CELL_DIVISION	Evi2b	down	1	1	0.00018229	0.0144705
GO_POSITIVE_REGULATION_OF_FIBROBLAST_APOPTOTIC_PROCESS	Bcl2l11	down	1	1	0.00018229	0.0144705
GO_POSITIVE_REGULATION_OF_MYELOID_LEUKOCYTE_DIFFERENTIATION	Evi2b:Lef1	down	2	1	0.000183096	0.0144705
GO_ALPHA_BETA_T_CELL_ACTIVATION	Lef1:Bcl6:Tcf7	down	3	1	0.000163096	0.0144705
GO_REGULATION_OF_RHO_PROTEIN_SIGNAL_TRANSDUCTION	Stmn1:Bcl6:Gpr174	down	3	1	0.000177482	0.0144705
GO_MYELOID_CELL_DIFFERENTIATION	Ikzf1:Evi2b:Gpr171:Lef1:Bcl6	down	5	1	0.000166532	0.0144705
GO_C_TERMINAL_PROTEIN_LIPIDATION	Gpld1	up	1	1	0.000446252	0.0145006
GO_REGULATION_OF_HIGH_DENSITY_LIPOPROTEIN_PARTICLE_CLEARANCE	Gpld1	up	1	1	0.000446252	0.0145006
GO_FATTY_ACID_ELONGATION_SATURATED_FATTY_ACID	Elovl6	up	1	1	0.000446252	0.0145006
GO_INTERLEUKIN_4_MEDIATED_SIGNALING_PATHWAY	Parp14	up	1	1	0.000446252	0.0145006
GO_PARACRINE_SIGNALING	Tnfsf11	up	1	1	0.000446252	0.0145006
GO_NEGATIVE_REGULATION_OF_VASOCONSTRICTION	Bmpr2	up	1	1	0.000446252	0.0145006
GO_NEUROFILAMENT_CYTOSKELETON_ORGANIZATION	Ina	up	1	1	0.000446252	0.0145006
GO_NEGATIVE_REGULATION_OF_RESPONSE_TO_INTERFERON_GAMMA	Parp14	up	1	1	0.000446252	0.0145006
GO_REGULATION_OF_CALCIDIOL_1_MONOOXYGENASE_ACTIVITY	Ifng	up	1	1	0.000446252	0.0145006
GO_TESTOSTERONE_BIOSYNTHETIC_PROCESS	Dkkl1	up	1	1	0.000446252	0.0145006
GO_DETERMINATION_OF_DIGESTIVE_TRACT_LEFT_RIGHT_ASYMMETRY	Megf8	up	1	1	0.000446252	0.0145006
GO_MODULATION_OF_AGE_RELATED_BEHAVIORAL_DECLINE	Prnp	up	1	1	0.000446252	0.0145006
GO_HISTONE_H3_K27_TRIMETHYLATION	Ezh2	up	1	1	0.000446252	0.0145006
GO_POSITIVE_REGULATION_OF_NLRP3_INFLAMMASOME_COMPLEX_ASSEMBLY	Gbp5	up	1	1	0.000446252	0.0145006
GO_REGULATION_OF_INORGANIC_ANION_TRANSMEMBRANE_TRANSPORT	Prnp	up	1	1	0.000446252	0.0145006
GO_NEGATIVE_REGULATION_OF_DENDRITIC_CELL_APOPTOTIC_PROCESS	Axl	up	1	1	0.000446252	0.0145006
GO_POSITIVE_REGULATION_OF_CARTILAGE_DEVELOPMENT	Loxl2:Bmpr2	up	2	1	0.000442497	0.0145006
GO_INTERACTION_WITH_HOST	Ifitm3:Ifitm2:Ctnnd1:Kpna1:Axl	up	5	1	0.000449814	0.0145006
GO_LEUKOCYTE_MIGRATION	Tbx21:Cxcl10:Mmp14:Pros1:Ccl1:Arhgef5:Hsd3b7:Tnfsf11	up	8	3	0.000448007	0.0145006
GO_POSITIVE_REGULATION_OF_TRANSPORT	Rhoq:Gpld1:Ifng:Il2:Cxcl10:Axl:Prnp:Ccl1:Ifih1:Stxbp1:Arhgef5:Tnfsf11	up	12	5	0.00045896	0.0147308
GO_REGULATION_OF_T_CELL_DIFFERENTIATION	Tbx21:Ifng:Il2:Socs1	up	4	1	0.000469923	0.0150171
GO_POSITIVE_REGULATION_OF_INTERLEUKIN_12_PRODUCTION	Irf8:Ifng	up	2	1	0.000485112	0.0153029
GO_POSITIVE_REGULATION_OF_PHOSPHATASE_ACTIVITY	Gpld1:Ifng	up	2	1	0.000485112	0.0153029
GO_REGULATION_OF_CHEMOTAXIS	Megf8:Cxcl10:Ccl1:Bmpr2:Sema7a	up	5	1	0.000484872	0.0153029
GO_MEMBRANE_LIPID_BIOSYNTHETIC_PROCESS	B4galnt1:St8sia6:Ugcg	down	3	1	0.000198062	0.0154867
GO_REGULATION_OF_T_HELPER_2_CELL_DIFFERENTIATION	Bcl6	down	1	1	0.000222511	0.0155758
GO_NEGATIVE_REGULATION_OF_B_CELL_MEDIATED_IMMUNITY	Bcl6	down	1	1	0.000222511	0.0155758
GO_DEOXYRIBONUCLEOSIDE_MONOPHOSPHATE_BIOSYNTHETIC_PROCESS	Dck	down	1	1	0.000222511	0.0155758
GO_MUCUS_SECRETION	Sytl2	down	1	1	0.000222511	0.0155758
GO_CELL_PROLIFERATION_IN_BONE_MARROW	Lef1	down	1	1	0.000222511	0.0155758
GO_IMMUNOLOGICAL_MEMORY_PROCESS	Bcl6	down	1	1	0.000222511	0.0155758
GO_MITOTIC_DNA_REPLICATION	Bcl6	down	1	1	0.000222511	0.0155758
GO_REGULATION_OF_LYMPHOCYTE_APOPTOTIC_PROCESS	Bcl6:Cd27	down	2	1	0.000204046	0.0155758
GO_NEGATIVE_REGULATION_OF_SMALL_GTPASE_MEDIATED_SIGNAL_TRANSDUCTION	Stmn1:Bcl6	down	2	1	0.000204046	0.0155758
GO_MYELOID_CELL_HOMEOSTASIS	Bcl2l11:Ikzf1:Bcl6	down	3	1	0.000214588	0.0155758
GO_REGULATION_OF_LEUKOCYTE_DIFFERENTIATION	Evi2b:Lef1:Bcl6:Cd27	down	4	1	0.000215798	0.0155758
GO_ADHERENS_JUNCTION_ORGANIZATION	Ctnnd1:Gpm6b:Lama5:Mmp14	up	4	1	0.000501851	0.0157633
GO_CELL_CHEMOTAXIS	Hbegf:Cxcl10:Ccl1:Arhgef5:Hsd3b7:Tnfsf11	up	6	2	0.000506356	0.0158371
GO_LYMPHOCYTE_ACTIVATION	Ebi3:Tbx21:Ifng:Il2:Mmp14:Axl:Prnp:Tnfsf11:Socs1:Ms4a1	up	10	4	0.000512739	0.0159688
GO_INFLAMMATORY_RESPONSE	Usp18:Gbp5:Metrnl:Il2:Cxcl10:Lta:Axl:Ccl1:Sema7a:Tnfsf11	up	10	4	0.000518712	0.0160866
GO_NEGATIVE_REGULATION_OF_GLYCOPROTEIN_BIOSYNTHETIC_PROCESS	Itm2a	down	1	1	0.000266668	0.0161984
GO_SPHINGOLIPID_MEDIATED_SIGNALING_PATHWAY	S1pr1	down	1	1	0.000266668	0.0161984
GO_REGULATION_OF_IRE1_MEDIATED_UNFOLDED_PROTEIN_RESPONSE	Bcl2l11	down	1	1	0.000266668	0.0161984
GO_PYRIMIDINE_CONTAINING_COMPOUND_SALVAGE	Dck	down	1	1	0.000266668	0.0161984
GO_POSITIVE_REGULATION_OF_B_CELL_DIFFERENTIATION	Cd27	down	1	1	0.000266668	0.0161984
GO_NEGATIVE_REGULATION_OF_B_CELL_APOPTOTIC_PROCESS	Bcl6	down	1	1	0.000266668	0.0161984
GO_NEGATIVE_REGULATION_OF_IMMUNOGLOBULIN_PRODUCTION	Bcl6	down	1	1	0.000266668	0.0161984
GO_ER_OVERLOAD_RESPONSE	Bcl2l11	down	1	1	0.000266668	0.0161984
GO_POST_EMBRYONIC_ANIMAL_MORPHOGENESIS	Bcl2l11	down	1	1	0.000266668	0.0161984
GO_LIPID_GLYCOSYLATION	B4galnt1	down	1	1	0.000266668	0.0161984
GO_NEGATIVE_REGULATION_OF_MICROTUBULE_POLYMERIZATION	Stmn1	down	1	1	0.000266668	0.0161984
GO_AMYLOID_PRECURSOR_PROTEIN_BIOSYNTHETIC_PROCESS	Itm2a	down	1	1	0.000266668	0.0161984
GO_POSITIVE_REGULATION_OF_KILLING_OF_CELLS_OF_OTHER_ORGANISM	Bcl2l11	down	1	1	0.000266668	0.0161984
GO_RADIAL_GLIAL_CELL_DIFFERENTIATION	Lef1	down	1	1	0.000266668	0.0161984
GO_THROMBIN_ACTIVATED_RECEPTOR_SIGNALING_PATHWAY	Stmn1	down	1	1	0.000266668	0.0161984
GO_REGULATION_OF_GTP_BINDING	Stmn1	down	1	1	0.000266668	0.0161984
GO_NEGATIVE_REGULATION_OF_INTERFERON_GAMMA_PRODUCTION	Axl:Prnp	up	2	1	0.000530271	0.0163075
GO_POSITIVE_REGULATION_OF_ORGANIC_ACID_TRANSPORT	Stxbp1:Tnfsf11	up	2	1	0.000530271	0.0163075
GO_POSITIVE_REGULATION_OF_CELL_POPULATION_PROLIFERATION	Ebi3:Hbegf:Ezh2:Ifng:Il2:Il3:Il12rb2:Cxcl10:Lta:Cd248:Marcksl1:Bmpr2	up	12	5	0.000542309	0.0166082
GO_POSITIVE_REGULATION_OF_LEUKOCYTE_CELL_CELL_ADHESION	Ebi3:Ifng:Il2:Tnfsf11:Socs1	up	5	2	0.000548002	0.0167129
GO_REGULATION_OF_FEVER_GENERATION	Tnfsf11	up	1	1	0.000593197	0.0168992
GO_OSTEOCLAST_PROLIFERATION	Tnfsf11	up	1	1	0.000593197	0.0168992
GO_CHROMATIN_SILENCING_AT_TELOMERE	Ezh2	up	1	1	0.000593197	0.0168992
GO_HISTIDINE_CATABOLIC_PROCESS	Hdc	up	1	1	0.000593197	0.0168992
GO_PENETRATION_OF_ZONA_PELLUCIDA	Dkkl1	up	1	1	0.000593197	0.0168992
GO_INTERLEUKIN_23_PRODUCTION	Ifng	up	1	1	0.000593197	0.0168992
GO_POSITIVE_REGULATION_OF_NATURAL_KILLER_CELL_DIFFERENTIATION	Axl	up	1	1	0.000593197	0.0168992
GO_B_CELL_CHEMOTAXIS	Hsd3b7	up	1	1	0.000593197	0.0168992
GO_ASTROCYTE_CELL_MIGRATION	Mmp14	up	1	1	0.000593197	0.0168992
GO_LYMPHATIC_ENDOTHELIAL_CELL_DIFFERENTIATION	Bmpr2	up	1	1	0.000593197	0.0168992
GO_PHARYNGEAL_ARCH_ARTERY_MORPHOGENESIS	Bmpr2	up	1	1	0.000593197	0.0168992
GO_NEGATIVE_REGULATION_OF_STEM_CELL_POPULATION_MAINTENANCE	Loxl2	up	1	1	0.000593197	0.0168992
GO_REGULATION_OF_CORE_PROMOTER_BINDING	Ifng	up	1	1	0.000593197	0.0168992
GO_RESPONSE_TO_INTERLEUKIN_4	Nfil3:Parp14	up	2	1	0.000578036	0.0168992
GO_REGULATION_OF_T_HELPER_CELL_DIFFERENTIATION	Tbx21:Il2	up	2	1	0.000578036	0.0168992
GO_POSITIVE_REGULATION_OF_CD4_POSITIVE_ALPHA_BETA_T_CELL_ACTIVATION	Ifng:Socs1	up	2	1	0.000578036	0.0168992
GO_LEUKOCYTE_CHEMOTAXIS	Cxcl10:Ccl1:Arhgef5:Hsd3b7:Tnfsf11	up	5	2	0.000561362	0.0168992
GO_LYMPHOCYTE_HOMEOSTASIS	Bcl2l11:Gpr174	down	2	1	0.000289445	0.0174378
GO_POSITIVE_REGULATION_OF_AXONOGENESIS	Megf8:Bmpr2:Sema7a	up	3	1	0.000615103	0.0174556
GO_REGULATION_OF_ISOTYPE_SWITCHING	Tbx21:Il2	up	2	1	0.000628467	0.0176982
GO_PROTEIN_LOCALIZATION_TO_CELL_PERIPHERY	Rhoq:Ifng:Lama5:Mmp14:Prnp:Stxbp1	up	6	2	0.000626907	0.0176982
GO_ETHER_METABOLIC_PROCESS	Ephx1	down	1	1	0.000314747	0.0180733
GO_VERY_LONG_CHAIN_FATTY_ACID_METABOLIC_PROCESS	Acsbg1	down	1	1	0.000314747	0.0180733
GO_POSITIVE_REGULATION_OF_ENDOPLASMIC_RETICULUM_UNFOLDED_PROTEIN_RESPONSE	Bcl2l11	down	1	1	0.000314747	0.0180733
GO_HYDROGEN_PEROXIDE_METABOLIC_PROCESS	Noxa1	down	1	1	0.000314747	0.0180733
GO_REGULATION_OF_CELL_FATE_SPECIFICATION	Lmo4	down	1	1	0.000314747	0.0180733
GO_CELLULAR_RESPONSE_TO_CORTICOSTEROID_STIMULUS	Bcl2l11:Ephx1	down	2	1	0.000303252	0.0180733
GO_REGULATION_OF_KINASE_ACTIVITY	Cish:Ezh2:Ifng:Il2:Cxcl10:Prnp:Arhgef5:Tnfsf11:Socs1:Socs2:Maged1	up	11	5	0.00064985	0.0182305
GO_STEROID_METABOLIC_PROCESS	Dkkl1:Ifng:Igfbp7:Lima1:Elovl6:Hsd3b7	up	6	2	0.000663459	0.0185415
GO_CELLULAR_RESPONSE_TO_PEPTIDE_HORMONE_STIMULUS	Foxo6:Cish:Rhoq:Gpld1:Socs1:Socs2	up	6	2	0.000676012	0.0188208
GO_NEGATIVE_REGULATION_OF_TYPE_2_IMMUNE_RESPONSE	Bcl6	down	1	1	0.000366731	0.0188494
GO_SPINAL_CORD_ASSOCIATION_NEURON_DIFFERENTIATION	Lmo4	down	1	1	0.000366731	0.0188494
GO_DIACYLGLYCEROL_METABOLIC_PROCESS	Dgka	down	1	1	0.000366731	0.0188494
GO_NEGATIVE_REGULATION_OF_RECEPTOR_BINDING	Lef1	down	1	1	0.000366731	0.0188494
GO_GENITALIA_MORPHOGENESIS	Tcf7	down	1	1	0.000366731	0.0188494
GO_RESPONSE_TO_LEUCINE	Sesn1	down	1	1	0.000366731	0.0188494
GO_T_HELPER_2_CELL_DIFFERENTIATION	Bcl6	down	1	1	0.000366731	0.0188494
GO_POSITIVE_REGULATION_OF_REGULATORY_T_CELL_DIFFERENTIATION	Bcl6	down	1	1	0.000366731	0.0188494
GO_NEUROBLAST_DIVISION	Lef1	down	1	1	0.000366731	0.0188494
GO_MYELOID_CELL_DEVELOPMENT	Evi2b:Bcl6	down	2	1	0.000347208	0.0188494
GO_T_CELL_DIFFERENTIATION_INVOLVED_IN_IMMUNE_RESPONSE	Lef1:Bcl6	down	2	1	0.000332129	0.0188494
GO_RESPONSE_TO_CORTICOSTEROID	Bcl2l11:Ephx1:Acsbg1	down	3	1	0.000359407	0.0188494
GO_B_CELL_ACTIVATION	Lef1:Bcl6:Cd27:Itm2a	down	4	1	0.000350287	0.0188494
GO_REGULATION_OF_HEMOPOIESIS	Evi2b:Gpr171:Lef1:Bcl6:Cd27	down	5	1	0.000352115	0.0188494
GO_CARBOHYDRATE_DERIVATIVE_BIOSYNTHETIC_PROCESS	Dck:Acsbg1:B4galnt1:St8sia6:Ugcg:Itm2a	down	6	2	0.000335498	0.0188494
GO_POSITIVE_REGULATION_OF_BONE_MINERALIZATION	Gpm6b:Bmpr2	up	2	1	0.000681625	0.0189054
GO_POSITIVE_REGULATION_OF_SECRETION	Gpld1:Ifng:Il2:Ccl1:Ifih1:Stxbp1:Tnfsf11	up	7	2	0.000686157	0.0189596
GO_NEGATIVE_REGULATION_OF_RETINOIC_ACID_RECEPTOR_SIGNALING_PATHWAY	Ezh2	up	1	1	0.000760367	0.0194728
GO_REGULATION_OF_CHRONIC_INFLAMMATORY_RESPONSE	Lta	up	1	1	0.000760367	0.0194728
GO_NEGATIVE_REGULATION_OF_T_CELL_CYTOKINE_PRODUCTION	Tbx21	up	1	1	0.000760367	0.0194728
GO_REGULATION_OF_ANION_CHANNEL_ACTIVITY	Prnp	up	1	1	0.000760367	0.0194728
GO_REGULATION_OF_ACTIVATION_OF_JANUS_KINASE_ACTIVITY	Socs1	up	1	1	0.000760367	0.0194728
GO_REGULATION_OF_ALKALINE_PHOSPHATASE_ACTIVITY	Gpld1	up	1	1	0.000760367	0.0194728
GO_REGULATION_OF_PROTEIN_ADP_RIBOSYLATION	Ifng	up	1	1	0.000760367	0.0194728
GO_ELASTIN_METABOLIC_PROCESS	Hbegf	up	1	1	0.000760367	0.0194728
GO_REGULATION_OF_VITAMIN_D_BIOSYNTHETIC_PROCESS	Ifng	up	1	1	0.000760367	0.0194728
GO_POSITIVE_REGULATION_OF_MACROPHAGE_CYTOKINE_PRODUCTION	Sema7a	up	1	1	0.000760367	0.0194728
GO_POSTSYNAPTIC_SIGNAL_TRANSDUCTION	Kpna1	up	1	1	0.000760367	0.0194728
GO_POSTSYNAPTIC_ACTIN_CYTOSKELETON_ORGANIZATION	Ina	up	1	1	0.000760367	0.0194728
GO_REGULATION_OF_NEURON_PROJECTION_ARBORIZATION	Mov10	up	1	1	0.000760367	0.0194728
GO_POSITIVE_REGULATION_OF_BONE_DEVELOPMENT	Tnfsf11	up	1	1	0.000760367	0.0194728
GO_DENSE_CORE_GRANULE_EXOCYTOSIS	Stxbp1	up	1	1	0.000760367	0.0194728
GO_NEGATIVE_REGULATION_OF_BLOOD_CIRCULATION	Il2:Bmpr2	up	2	1	0.000737566	0.0194728
GO_POSITIVE_REGULATION_OF_PROTEIN_IMPORT	Ifng:Arhgef5	up	2	1	0.000737566	0.0194728
GO_REGULATION_OF_HORMONE_METABOLIC_PROCESS	Dkkl1:Ifng	up	2	1	0.000737566	0.0194728
GO_MONONUCLEAR_CELL_MIGRATION	Cxcl10:Ccl1:Tnfsf11	up	3	1	0.000734615	0.0194728
GO_TAXIS	Hbegf:Megf8:Cxcl10:Ccl1:Bmpr2:Arhgef5:Hsd3b7:Sema7a:Tnfsf11	up	9	3	0.000743823	0.0194728
GO_CELLULAR_RESPONSE_TO_NITROGEN_COMPOUND	Foxo6:Cish:Ezh2:Rhoq:Gpld1:Prnp:Ifih1:Socs1:Socs2	up	9	3	0.000726053	0.0194728
GO_MORPHOGENESIS_OF_AN_EPITHELIUM	Hbegf:Megf8:Cxcl10:Rhoc:Lama5:Mmp14:Pcdh8:Maged1	up	8	3	0.00076664	0.0195063
GO_REGULATION_OF_CELL_POPULATION_PROLIFERATION	Ebi3:Hbegf:Ezh2:Gpld1:Ifng:Igfbp7:Il2:Il3:Il12rb2:Cxcl10:Lama5:Lta:Prnp:Cd248:Marcksl1:Bmpr2:Maged1	up	17	8	0.000766983	0.0195063
GO_POSITIVE_REGULATION_OF_NEUROTRANSMITTER_TRANSPORT	Stxbp1:Tnfsf11	up	2	1	0.000796348	0.0201833
GO_ADHERENS_JUNCTION_ASSEMBLY	Gpm6b:Lama5:Mmp14	up	3	1	0.000800142	0.0202098
GO_POSITIVE_REGULATION_OF_IMMUNE_RESPONSE	Gbp5:Gpld1:Tbx21:Ifng:Il2:Lta:Prnp:Pros1:Ifih1:Stxbp1:Sema7a	up	11	5	0.000826446	0.0208027
GO_PYRIMIDINE_NUCLEOSIDE_BIOSYNTHETIC_PROCESS	Dck	down	1	1	0.000422605	0.0208466
GO_PURINE_CONTAINING_COMPOUND_SALVAGE	Dck	down	1	1	0.000422605	0.0208466
GO_CELL_MIGRATION_IN_HINDBRAIN	Lef1	down	1	1	0.000422605	0.0208466
GO_GERMINAL_CENTER_FORMATION	Bcl6	down	1	1	0.000422605	0.0208466
GO_POST_EMBRYONIC_ANIMAL_ORGAN_DEVELOPMENT	Bcl2l11	down	1	1	0.000422605	0.0208466
GO_REGULATION_OF_KILLING_OF_CELLS_OF_OTHER_ORGANISM	Bcl2l11	down	1	1	0.000422605	0.0208466
GO_CELL_ACTIVATION	Ikzf1:Dgka:Lef1:Bcl6:Sell:Tcf7:Lmo4:Cd27:Itm2a	down	9	3	0.000430218	0.0210807
GO_NEGATIVE_REGULATION_OF_STRIATED_MUSCLE_CELL_DIFFERENTIATION	Ezh2:Cxcl10	up	2	1	0.000858029	0.0215239
GO_LYMPHOCYTE_ACTIVATION_INVOLVED_IN_IMMUNE_RESPONSE	Lef1:Bcl6:Itm2a	down	3	1	0.000448522	0.021832
GO_CELL_JUNCTION_ASSEMBLY	Ctnnd1:Gpm6b:Rhoc:Lama5:Mmp14	up	5	2	0.000886004	0.0221501
GO_REGULATION_OF_RESPIRATORY_BURST	Noxa1	down	1	1	0.000482354	0.0221581
GO_DENTATE_GYRUS_DEVELOPMENT	Lef1	down	1	1	0.000482354	0.0221581
GO_REGULATION_OF_NUCLEAR_CELL_CYCLE_DNA_REPLICATION	Bcl6	down	1	1	0.000482354	0.0221581
GO_NUCLEOSIDE_SALVAGE	Dck	down	1	1	0.000482354	0.0221581
GO_REGULATION_OF_DEVELOPMENTAL_PIGMENTATION	Bcl2l11	down	1	1	0.000482354	0.0221581
GO_NEGATIVE_REGULATION_OF_T_HELPER_CELL_DIFFERENTIATION	Bcl6	down	1	1	0.000482354	0.0221581
GO_HEPATOCYTE_GROWTH_FACTOR_RECEPTOR_SIGNALING_PATHWAY	Stmn1	down	1	1	0.000482354	0.0221581
GO_NEGATIVE_REGULATION_OF_TORC1_SIGNALING	Sesn1	down	1	1	0.000482354	0.0221581
GO_B_CELL_ACTIVATION_INVOLVED_IN_IMMUNE_RESPONSE	Bcl6:Itm2a	down	2	1	0.00046523	0.0221581
GO_ANATOMICAL_STRUCTURE_REGRESSION	Cd248	up	1	1	0.000947577	0.0223227
GO_FEVER_GENERATION	Tnfsf11	up	1	1	0.000947577	0.0223227
GO_POSITIVE_REGULATION_OF_GLUTAMATE_SECRETION	Stxbp1	up	1	1	0.000947577	0.0223227
GO_FRUCTOSE_1_6_BISPHOSPHATE_METABOLIC_PROCESS	Ifng	up	1	1	0.000947577	0.0223227
GO_REGULATION_OF_SYNAPTIC_VESICLE_FUSION_TO_PRESYNAPTIC_ACTIVE_ZONE_MEMBRANE	Stxbp1	up	1	1	0.000947577	0.0223227
GO_NEGATIVE_REGULATION_OF_HORMONE_METABOLIC_PROCESS	Dkkl1	up	1	1	0.000947577	0.0223227
GO_POSITIVE_REGULATION_OF_PROTEIN_HOMOOLIGOMERIZATION	Rhoc	up	1	1	0.000947577	0.0223227
GO_INTERLEUKIN_18_PRODUCTION	Gbp5	up	1	1	0.000947577	0.0223227
GO_CELLULAR_RESPONSE_TO_INTERFERON_ALPHA	Axl	up	1	1	0.000947577	0.0223227
GO_MDA_5_SIGNALING_PATHWAY	Ifih1	up	1	1	0.000947577	0.0223227
GO_VAGINA_DEVELOPMENT	Axl	up	1	1	0.000947577	0.0223227
GO_G1_TO_G0_TRANSITION	Ezh2	up	1	1	0.000947577	0.0223227
GO_TYPE_I_INTERFERON_SECRETION	Ifih1	up	1	1	0.000947577	0.0223227
GO_POSITIVE_REGULATION_OF_BROWN_FAT_CELL_DIFFERENTIATION	Metrnl	up	1	1	0.000947577	0.0223227
GO_NEURON_PROJECTION_MAINTENANCE	Prnp	up	1	1	0.000947577	0.0223227
GO_REGULATION_OF_T_HELPER_2_CELL_CYTOKINE_PRODUCTION	Tbx21	up	1	1	0.000947577	0.0223227
GO_REGULATION_OF_CHLORIDE_TRANSPORT	Prnp	up	1	1	0.000947577	0.0223227
GO_POSITIVE_REGULATION_OF_DENDRITIC_SPINE_DEVELOPMENT	Foxo6:Il2	up	2	1	0.000922662	0.0223227
GO_NEGATIVE_REGULATION_OF_DEVELOPMENTAL_PROCESS	Ezh2:Tmem176b:Tbx21:Ifng:Il2:Cxcl10:Loxl2:Tmem176a:Bmpr2:Sema7a:Socs1:Socs2	up	12	5	0.00097263	0.0228397
GO_EMBRYONIC_SKELETAL_SYSTEM_MORPHOGENESIS	Irx5:Megf8:Mmp14	up	3	1	0.000981863	0.0229101
GO_REGULATION_OF_ANION_TRANSPORT	Prnp:Stxbp1:Tnfsf11	up	3	1	0.000981863	0.0229101
GO_MEMBRANE_PROTEIN_ECTODOMAIN_PROTEOLYSIS	Gpld1:Ifng	up	2	1	0.000990304	0.0229613
GO_POSITIVE_REGULATION_OF_DNA_RECOMBINATION	Tbx21:Il2	up	2	1	0.000990304	0.0229613
GO_TISSUE_MORPHOGENESIS	Hbegf:Megf8:Cxcl10:Rhoc:Lama5:Mmp14:Pcdh8:Bmpr2:Maged1	up	9	4	0.000998031	0.0230677
GO_POSITIVE_REGULATION_OF_ESTABLISHMENT_OF_PROTEIN_LOCALIZATION	Gpld1:Ifng:Il2:Prnp:Ccl1:Ifih1:Arhgef5	up	7	3	0.00100368	0.0231255
GO_REGULATION_OF_PROSTAGLANDIN_SECRETION	Tnfsf11	up	1	1	0.00115464	0.0240413
GO_NEGATIVE_REGULATION_OF_TRANSCRIPTION_ELONGATION_FROM_RNA_POLYMERASE_II_PROMOTER	Ezh2	up	1	1	0.00115464	0.0240413
GO_REGULATION_OF_GLYCOPROTEIN_METABOLIC_PROCESS	Hbegf	up	1	1	0.00115464	0.0240413
GO_REGULATION_OF_TRIGLYCERIDE_CATABOLIC_PROCESS	Gpld1	up	1	1	0.00115464	0.0240413
GO_NEGATIVE_REGULATION_OF_MULTICELLULAR_ORGANISM_GROWTH	Socs2	up	1	1	0.00115464	0.0240413
GO_POSITIVE_REGULATION_OF_IMMUNOGLOBULIN_SECRETION	Il2	up	1	1	0.00115464	0.0240413
GO_POSITIVE_REGULATION_OF_INFLAMMATORY_RESPONSE_TO_ANTIGENIC_STIMULUS	Lta	up	1	1	0.00115464	0.0240413
GO_REGULATION_OF_HUMORAL_IMMUNE_RESPONSE_MEDIATED_BY_CIRCULATING_IMMUNOGLOBULIN	Lta	up	1	1	0.00115464	0.0240413
GO_MITRAL_VALVE_DEVELOPMENT	Bmpr2	up	1	1	0.00115464	0.0240413
GO_OLIGOPEPTIDE_TRANSPORT	Slc15a3	up	1	1	0.00115464	0.0240413
GO_NEGATIVE_REGULATION_OF_CELL_FATE_COMMITMENT	Tbx21	up	1	1	0.00115464	0.0240413
GO_POSITIVE_REGULATION_OF_LIPOPROTEIN_PARTICLE_CLEARANCE	Gpld1	up	1	1	0.00115464	0.0240413
GO_POSITIVE_REGULATION_OF_HEAT_GENERATION	Tnfsf11	up	1	1	0.00115464	0.0240413
GO_REGULATION_OF_SNARE_COMPLEX_ASSEMBLY	Stxbp1	up	1	1	0.00115464	0.0240413
GO_POSITIVE_REGULATION_OF_CYTOLYSIS	Gpld1	up	1	1	0.00115464	0.0240413
GO_NEGATIVE_REGULATION_OF_ACTIVATED_T_CELL_PROLIFERATION	Prnp	up	1	1	0.00115464	0.0240413
GO_POSITIVE_REGULATION_OF_HORMONE_BIOSYNTHETIC_PROCESS	Ifng	up	1	1	0.00115464	0.0240413
GO_REGULATION_OF_PINOCYTOSIS	Axl	up	1	1	0.00115464	0.0240413
GO_INTERLEUKIN_27_MEDIATED_SIGNALING_PATHWAY	Ebi3	up	1	1	0.00115464	0.0240413
GO_PROTEIN_AUTO_ADP_RIBOSYLATION	Parp12	up	1	1	0.00115464	0.0240413
GO_POSITIVE_REGULATION_OF_PODOSOME_ASSEMBLY	Arhgef5	up	1	1	0.00115464	0.0240413
GO_DENDRITIC_CELL_APOPTOTIC_PROCESS	Axl	up	1	1	0.00115464	0.0240413
GO_POSTSYNAPTIC_CYTOSKELETON_ORGANIZATION	Ina	up	1	1	0.00115464	0.0240413
GO_REGULATION_OF_MONONUCLEAR_CELL_MIGRATION	Cxcl10:Ccl1	up	2	1	0.00113482	0.0240413
GO_POSITIVE_REGULATION_OF_IMMUNOGLOBULIN_PRODUCTION	Tbx21:Il2	up	2	1	0.00113482	0.0240413
GO_POSITIVE_REGULATION_OF_TISSUE_REMODELING	Il2:Tnfsf11	up	2	1	0.00113482	0.0240413
GO_BLOOD_VESSEL_REMODELING	Axl:Bmpr2	up	2	1	0.00113482	0.0240413
GO_ACTIVATED_T_CELL_PROLIFERATION	Il2:Prnp	up	2	1	0.00113482	0.0240413
GO_CELL_SUBSTRATE_JUNCTION_ASSEMBLY	Gpm6b:Lama5:Mmp14	up	3	1	0.00106207	0.0240413
GO_POSITIVE_REGULATION_OF_PRODUCTION_OF_MOLECULAR_MEDIATOR_OF_IMMUNE_RESPONSE	Tbx21:Il2:Sema7a	up	3	1	0.00106207	0.0240413
GO_POSITIVE_REGULATION_OF_EPITHELIAL_CELL_MIGRATION	Hbegf:Gpld1:Ifng:Bmpr2	up	4	1	0.0011119	0.0240413
GO_REGULATION_OF_CELL_PROJECTION_ORGANIZATION	Foxo6:Megf8:Ezh2:Rhoq:Il2:Mov10:Prnp:Bmpr2:Sema7a	up	9	4	0.00106864	0.0240413
GO_RESPONSE_TO_LIPID	Gpr83:Ezh2:Gpld1:Irf8:Igfbp7:Il12rb2:Cxcl10:Lta:Axl:Stxbp1:Socs2	up	11	5	0.00113368	0.0240413
GO_RESPONSE_TO_OXYGEN_CONTAINING_COMPOUND	Foxo6:Cish:Ezh2:Rhoq:Gpld1:Irf8:Igfbp7:Il2:Il12rb2:Cxcl10:Lta:Axl:Prnp:Stxbp1:Socs1:Socs2	up	16	8	0.00112629	0.0240413
GO_POSITIVE_REGULATION_OF_CELLULAR_COMPONENT_ORGANIZATION	Foxo6:Gbp5:Megf8:Ezh2:Rhoq:Ifng:Il2:Rhoc:Axl:Bmpr2:Tpbg:Arhgef5:Sema7a	up	13	6	0.00116009	0.0240866
GO_DISRUPTION_OF_CELLS_OF_OTHER_ORGANISM_INVOLVED_IN_SYMBIOTIC_INTERACTION	Bcl2l11	down	1	1	0.000545963	0.0243202
GO_POSITIVE_REGULATION_BY_HOST_OF_VIRAL_TRANSCRIPTION	Lef1	down	1	1	0.000545963	0.0243202
GO_POSITIVE_REGULATION_OF_HISTONE_DEACETYLATION	Bcl6	down	1	1	0.000545963	0.0243202
GO_VENTRAL_SPINAL_CORD_INTERNEURON_DIFFERENTIATION	Lmo4	down	1	1	0.000545963	0.0243202
GO_PARAXIAL_MESODERM_DEVELOPMENT	Lef1	down	1	1	0.000545963	0.0243202
GO_HUMORAL_IMMUNE_RESPONSE	Ebi3:Ifng:Cxcl10:Lta:Pros1:Ms4a1	up	6	2	0.00118849	0.0245377
GO_LYMPHOCYTE_DIFFERENTIATION	Tbx21:Ifng:Il2:Mmp14:Axl:Socs1	up	6	2	0.00118849	0.0245377
GO_INTERSPECIES_INTERACTION_BETWEEN_ORGANISMS	Ifitm3:Ifitm2:Ctnnd1:Irf8:Ifng:Kpna1:Lta:Axl:Ccl1:Ifih1:Tbkbp1	up	11	5	0.00119868	0.0246787
GO_NEGATIVE_REGULATION_OF_ADAPTIVE_IMMUNE_RESPONSE	Tbx21:Il2	up	2	1	0.00121181	0.0247411
GO_NEGATIVE_REGULATION_OF_TYPE_I_INTERFERON_PRODUCTION	Ifih1:Ube2l6	up	2	1	0.00121181	0.0247411
GO_RESPONSE_TO_COPPER_ION	Loxl2:Prnp	up	2	1	0.00121181	0.0247411
GO_T_CELL_ACTIVATION_INVOLVED_IN_IMMUNE_RESPONSE	Tbx21:Ifng:Il2	up	3	1	0.00123609	0.0250484
GO_GLYCEROPHOSPHOLIPID_METABOLIC_PROCESS	Cish:Gpld1:Socs1:Socs2	up	4	1	0.00123533	0.0250484
GO_POSITIVE_REGULATION_OF_CELL_CELL_ADHESION	Ebi3:Ifng:Il2:Tnfsf11:Socs1	up	5	2	0.00123708	0.0250484
GO_LYMPHOCYTE_ACTIVATION	Ikzf1:Lef1:Bcl6:Tcf7:Cd27:Itm2a	down	6	2	0.000565734	0.0250491
GO_SPHINGOLIPID_METABOLIC_PROCESS	B4galnt1:Ugcg	down	2	1	0.000584692	0.0257334
GO_REGULATION_OF_IMMUNE_EFFECTOR_PROCESS	Tbx21:Ifng:Il2:Lta:Pros1:Stxbp1:Sema7a	up	7	3	0.00128014	0.025849
GO_POSITIVE_REGULATION_OF_BIOMINERAL_TISSUE_DEVELOPMENT	Gpm6b:Bmpr2	up	2	1	0.00129201	0.0259461
GO_EMBRYONIC_CRANIAL_SKELETON_MORPHOGENESIS	Irx5:Mmp14	up	2	1	0.00129201	0.0259461
GO_NEGATIVE_REGULATION_OF_GLYCOPROTEIN_BIOSYNTHETIC_PROCESS	Hbegf	up	1	1	0.00138137	0.0261676
GO_POSITIVE_REGULATION_OF_TRIGLYCERIDE_BIOSYNTHETIC_PROCESS	Gpld1	up	1	1	0.00138137	0.0261676
GO_POSITIVE_REGULATION_OF_INTERFERON_GAMMA_BIOSYNTHETIC_PROCESS	Ebi3	up	1	1	0.00138137	0.0261676
GO_POSITIVE_REGULATION_OF_B_CELL_DIFFERENTIATION	Mmp14	up	1	1	0.00138137	0.0261676
GO_NEGATIVE_REGULATION_OF_B_CELL_APOPTOTIC_PROCESS	Il2	up	1	1	0.00138137	0.0261676
GO_SYNAPTIC_VESICLE_MATURATION	Stxbp1	up	1	1	0.00138137	0.0261676
GO_ESTABLISHMENT_OR_MAINTENANCE_OF_ACTIN_CYTOSKELETON_POLARITY	Rhoc	up	1	1	0.00138137	0.0261676
GO_ENDOTHELIAL_CELL_ACTIVATION	Cxcl10	up	1	1	0.00138137	0.0261676
GO_VITAMIN_D_BIOSYNTHETIC_PROCESS	Ifng	up	1	1	0.00138137	0.0261676
GO_POSITIVE_REGULATION_OF_KILLING_OF_CELLS_OF_OTHER_ORGANISM	Ifng	up	1	1	0.00138137	0.0261676
GO_POSITIVE_REGULATION_OF_SMAD_PROTEIN_SIGNAL_TRANSDUCTION	Rbpms	up	1	1	0.00138137	0.0261676
GO_T_HELPER_17_CELL_LINEAGE_COMMITMENT	Tbx21	up	1	1	0.00138137	0.0261676
GO_NEGATIVE_REGULATION_OF_LONG_TERM_SYNAPTIC_POTENTIATION	Prnp	up	1	1	0.00138137	0.0261676
GO_REGULATION_OF_DENDRITIC_SPINE_MAINTENANCE	Prnp	up	1	1	0.00138137	0.0261676
GO_REGULATION_OF_OSTEOCLAST_DEVELOPMENT	Tnfsf11	up	1	1	0.00138137	0.0261676
GO_NEGATIVE_REGULATION_OF_EPITHELIAL_CELL_DIFFERENTIATION	Ezh2:Ifng	up	2	1	0.00137548	0.0261676
GO_POSITIVE_REGULATION_OF_ALPHA_BETA_T_CELL_DIFFERENTIATION	Ifng:Socs1	up	2	1	0.00137548	0.0261676
GO_REGULATION_OF_DNA_RECOMBINATION	Tbx21:Il2:Kpna1	up	3	1	0.00133019	0.0261676
GO_NEGATIVE_REGULATION_OF_CELL_CELL_ADHESION	Tbx21:Il2:Prnp:Socs1	up	4	1	0.00136863	0.0261676
GO_T_CELL_ACTIVATION	Ebi3:Tbx21:Ifng:Il2:Prnp:Tnfsf11:Socs1	up	7	3	0.00135329	0.0261676
GO_POSITIVE_REGULATION_OF_KINASE_ACTIVITY	Ezh2:Ifng:Il2:Prnp:Arhgef5:Tnfsf11:Socs1:Maged1	up	8	3	0.00136223	0.0261676
GO_REGULATION_OF_RESPONSE_TO_STRESS	Usp18:Gbp5:Hbegf:Metrnl:Ifng:Il2:Lta:Parp14:Pros1:Ccl1:Ifih1:Arhgef5:Sema7a:Tnfsf11:Socs1	up	15	7	0.0013667	0.0261676
GO_EMBRYONIC_DIGESTIVE_TRACT_MORPHOGENESIS	Tcf7	down	1	1	0.000613416	0.0263661
GO_REGULATION_OF_B_CELL_APOPTOTIC_PROCESS	Bcl6	down	1	1	0.000613416	0.0263661
GO_T_HELPER_1_CELL_DIFFERENTIATION	Lef1	down	1	1	0.000613416	0.0263661
GO_THYMOCYTE_APOPTOTIC_PROCESS	Bcl2l11	down	1	1	0.000613416	0.0263661
GO_NEGATIVE_REGULATION_OF_GROWTH	Irf8:Lta:Bmpr2:Sema7a:Socs2	up	5	2	0.00144836	0.0273661
GO_POSITIVE_REGULATION_OF_PATHWAY_RESTRICTED_SMAD_PROTEIN_PHOSPHORYLATION	Rbpms:Bmpr2	up	2	1	0.00146226	0.0275066
GO_NEGATIVE_REGULATION_OF_RESPONSE_TO_STIMULUS	Cish:Ctnnd1:Hbegf:Megf8:Ezh2:Dkkl1:Metrnl:Tbx21:Il2:Mmp14:Parp14:Prnp:Pros1:Sema7a:Socs1:Socs2	up	16	8	0.00146327	0.0275066
GO_NEGATIVE_REGULATION_OF_MULTI_ORGANISM_PROCESS	Ifitm3:Ifitm2:Irf8:Lta	up	4	1	0.00147537	0.0276156
GO_ORGANIC_HYDROXY_COMPOUND_BIOSYNTHETIC_PROCESS	Dkkl1:Hdc:Ifng:Elovl6:Hsd3b7	up	5	2	0.00147659	0.0276156
GO_POSITIVE_REGULATION_OF_ADAPTIVE_IMMUNE_RESPONSE	Tbx21:Il2:Lta	up	3	1	0.00148055	0.0276194
GO_PROTEIN_PHOSPHORYLATION	Rbpms:Hbegf:Ezh2:Ifng:Il2:Il3:Il12rb2:Cxcl10:Parp14:Axl:Prnp:Ccl1:Bmpr2:Arhgef5:Sema7a:Tnfsf11:Socs1:Maged1	up	18	10	0.0015238	0.0283542
GO_POSITIVE_REGULATION_OF_LYMPHOCYTE_MEDIATED_IMMUNITY	Tbx21:Il2:Lta	up	3	1	0.0015332	0.0283854
GO_REGULATION_OF_EXTENT_OF_CELL_GROWTH	Megf8:Bmpr2:Sema7a	up	3	1	0.0015332	0.0283854
GO_REGULATION_OF_PROTEIN_LOCALIZATION_TO_MEMBRANE	Rhoq:Ifng:Mmp14:Prnp	up	4	1	0.00154986	0.0286218
GO_CLATHRIN_COAT_ASSEMBLY	Nsg2	down	1	1	0.000684698	0.0287573
GO_TRACHEA_DEVELOPMENT	Lef1	down	1	1	0.000684698	0.0287573
GO_MATURE_B_CELL_DIFFERENTIATION_INVOLVED_IN_IMMUNE_RESPONSE	Itm2a	down	1	1	0.000684698	0.0287573
GO_LONG_CHAIN_FATTY_ACYL_COA_BIOSYNTHETIC_PROCESS	Acsbg1	down	1	1	0.000684698	0.0287573
GO_CELL_CELL_ADHESION	Ebi3:Ctnnd1:Tbx21:Ifng:Il2:Pcdh8:Prnp:Stxbp1:Tnfsf11:Socs1	up	10	4	0.00156952	0.0289123
GO_REGULATION_OF_HEAT_GENERATION	Tnfsf11	up	1	1	0.00162758	0.0291515
GO_REGULATION_OF_VITAMIN_METABOLIC_PROCESS	Ifng	up	1	1	0.00162758	0.0291515
GO_PROTEIN_HETEROTRIMERIZATION	C1qtnf6	up	1	1	0.00162758	0.0291515
GO_NEGATIVE_REGULATION_OF_EPIDERMAL_CELL_DIFFERENTIATION	Ezh2	up	1	1	0.00162758	0.0291515
GO_NEGATIVE_REGULATION_OF_DNA_TEMPLATED_TRANSCRIPTION_ELONGATION	Ezh2	up	1	1	0.00162758	0.0291515
GO_CALCIUM_ION_IMPORT_INTO_CYTOSOL	Prnp	up	1	1	0.00162758	0.0291515
GO_FATTY_ACID_ELONGATION	Elovl6	up	1	1	0.00162758	0.0291515
GO_COMPLEMENT_RECEPTOR_MEDIATED_SIGNALING_PATHWAY	Gpld1	up	1	1	0.00162758	0.0291515
GO_CHOLESTEROL_CATABOLIC_PROCESS	Hsd3b7	up	1	1	0.00162758	0.0291515
GO_T_HELPER_2_CELL_CYTOKINE_PRODUCTION	Tbx21	up	1	1	0.00162758	0.0291515
GO_NEGATIVE_REGULATION_OF_PROTEIN_LOCALIZATION_TO_CELL_SURFACE	Gpm6b	up	1	1	0.00162758	0.0291515
GO_RESPONSE_TO_COLD	Metrnl:Cxcl10	up	2	1	0.00164597	0.0291515
GO_POSITIVE_REGULATION_OF_EPITHELIAL_TO_MESENCHYMAL_TRANSITION	Ezh2:Loxl2	up	2	1	0.00164597	0.0291515
GO_NEGATIVE_REGULATION_OF_LEUKOCYTE_APOPTOTIC_PROCESS	Il2:Axl	up	2	1	0.00164597	0.0291515
GO_POSITIVE_REGULATION_OF_ANION_TRANSPORT	Stxbp1:Tnfsf11	up	2	1	0.00164597	0.0291515
GO_RESPONSE_TO_INTERLEUKIN_12	Ifng:Il12rb2	up	2	1	0.00164597	0.0291515
GO_REGULATION_OF_TRANSFERASE_ACTIVITY	Cish:Ezh2:Ifng:Il2:Cxcl10:Prnp:Arhgef5:Tnfsf11:Socs1:Socs2:Maged1	up	11	5	0.00165741	0.0292835
GO_OLIGOSACCHARIDE_METABOLIC_PROCESS	St8sia6	down	1	1	0.000759795	0.0301865
GO_TONGUE_DEVELOPMENT	Lef1	down	1	1	0.000759795	0.0301865
GO_NEGATIVE_REGULATION_OF_CD4_POSITIVE_ALPHA_BETA_T_CELL_DIFFERENTIATION	Bcl6	down	1	1	0.000759795	0.0301865
GO_REGULATION_OF_PROTEIN_HOMOOLIGOMERIZATION	Bcl2l11	down	1	1	0.000759795	0.0301865
GO_SIALYLATION	St8sia6	down	1	1	0.000759795	0.0301865
GO_DIOL_BIOSYNTHETIC_PROCESS	Ephx1	down	1	1	0.000759795	0.0301865
GO_REGULATION_OF_LEUKOCYTE_APOPTOTIC_PROCESS	Bcl6:Cd27	down	2	1	0.000746926	0.0301865
GO_CD4_POSITIVE_ALPHA_BETA_T_CELL_ACTIVATION	Lef1:Bcl6	down	2	1	0.000746926	0.0301865
GO_LEUKOCYTE_HOMEOSTASIS	Bcl2l11:Gpr174	down	2	1	0.000746926	0.0301865
GO_RHO_PROTEIN_SIGNAL_TRANSDUCTION	Stmn1:Bcl6:Gpr174	down	3	1	0.000738878	0.0301865
GO_REGULATION_OF_PEPTIDE_SECRETION	Gpld1:Ifng:Il2:Ccl1:Ifih1:Tnfsf11:Socs1	up	7	3	0.00172483	0.0303289
GO_REGULATION_OF_CELL_MORPHOGENESIS	Megf8:Fgd1:Rhoq:Rhoc:Mov10:Bmpr2:Sema7a	up	7	3	0.00172483	0.0303289
GO_NEGATIVE_REGULATION_OF_PEPTIDYL_TYROSINE_PHOSPHORYLATION	Parp14:Socs1	up	2	1	0.00174298	0.0305022
GO_SOMATIC_RECOMBINATION_OF_IMMUNOGLOBULIN_GENE_SEGMENTS	Tbx21:Il2	up	2	1	0.00174298	0.0305022
GO_ODONTOGENESIS_OF_DENTIN_CONTAINING_TOOTH	Bcl2l11:Lef1	down	2	1	0.000772201	0.0305144
GO_POSITIVE_REGULATION_OF_PEPTIDE_SECRETION	Gpld1:Il2:Ccl1:Ifih1:Tnfsf11	up	5	2	0.00174999	0.0305521
GO_MEMBRANE_LIPID_METABOLIC_PROCESS	B4galnt1:St8sia6:Ugcg	down	3	1	0.000795301	0.0312591
GO_POSITIVE_REGULATION_OF_CELL_DEATH	Fgd1:Dkkl1:Gpld1:Ifng:Lta:Prnp:Cd248:Arhgef5:Maged1	up	9	4	0.0018133	0.0315823
GO_REGULATION_OF_TRANSPORT	Rhoq:Gas1:Gpld1:Gpm6b:Ifng:Il2:Cxcl10:Kcnj15:Myo6:Axl:Prnp:Ccl1:Ifih1:Stxbp1:Arhgef5:Tnfsf11:Socs1	up	17	9	0.001826	0.0317283
GO_NEGATIVE_REGULATION_OF_TYPE_2_IMMUNE_RESPONSE	Tbx21	up	1	1	0.00189309	0.0317676
GO_POSITIVE_REGULATION_OF_MAST_CELL_ACTIVATION_INVOLVED_IN_IMMUNE_RESPONSE	Stxbp1	up	1	1	0.00189309	0.0317676
GO_CELLULAR_COPPER_ION_HOMEOSTASIS	Prnp	up	1	1	0.00189309	0.0317676
GO_GTP_METABOLIC_PROCESS	Rhoq	up	1	1	0.00189309	0.0317676
GO_REGULATION_OF_NATURAL_KILLER_CELL_DIFFERENTIATION	Axl	up	1	1	0.00189309	0.0317676
GO_CD8_POSITIVE_ALPHA_BETA_T_CELL_DIFFERENTIATION	Socs1	up	1	1	0.00189309	0.0317676
GO_NLRP3_INFLAMMASOME_COMPLEX_ASSEMBLY	Gbp5	up	1	1	0.00189309	0.0317676
GO_REGULATION_OF_KERATINOCYTE_MIGRATION	Hbegf	up	1	1	0.00189309	0.0317676
GO_RESPONSE_TO_INTERLEUKIN_2	Il2	up	1	1	0.00189309	0.0317676
GO_NEGATIVE_REGULATION_OF_AMYLOID_PRECURSOR_PROTEIN_CATABOLIC_PROCESS	Prnp	up	1	1	0.00189309	0.0317676
GO_POSITIVE_REGULATION_OF_STRESS_FIBER_ASSEMBLY	Rhoc:Arhgef5	up	2	1	0.00184351	0.0317676
GO_BONE_MORPHOGENESIS	Megf8:Mmp14:Bmpr2	up	3	1	0.00187678	0.0317676
GO_MESENCHYME_DEVELOPMENT	Ezh2:Lama5:Loxl2:Bmpr2:Sema7a	up	5	2	0.00184918	0.0317676
GO_PEPTIDE_SECRETION	Gbp5:Gpld1:Ifng:Il2:Ccl1:Ifih1:Tnfsf11:Socs1	up	8	3	0.0018493	0.0317676
GO_RESPONSE_TO_HORMONE	Foxo6:Gpr83:Cish:Ezh2:Rhoq:Gpld1:Igfbp7:Mmp14:Stxbp1:Socs1:Socs2	up	11	5	0.00187123	0.0317676
GO_NEGATIVE_REGULATION_OF_T_CELL_APOPTOTIC_PROCESS	Cd27	down	1	1	0.000838691	0.0324441
GO_POSITIVE_REGULATION_OF_PROTEIN_DEACETYLATION	Bcl6	down	1	1	0.000838691	0.0324441
GO_LABYRINTHINE_LAYER_MORPHOGENESIS	Lef1	down	1	1	0.000838691	0.0324441
GO_POSITIVE_REGULATION_OF_MYELOID_CELL_DIFFERENTIATION	Evi2b:Lef1	down	2	1	0.000851281	0.0325881
GO_NEGATIVE_REGULATION_OF_CYSTEINE_TYPE_ENDOPEPTIDASE_ACTIVITY	Lef1:Cd27	down	2	1	0.000851281	0.0325881
GO_REGULATION_OF_NEURON_PROJECTION_DEVELOPMENT	Foxo6:Megf8:Ezh2:Il2:Mov10:Bmpr2:Sema7a	up	7	3	0.00201453	0.0337284
GO_POSITIVE_REGULATION_OF_MYELOID_LEUKOCYTE_DIFFERENTIATION	Ifng:Tnfsf11	up	2	1	0.00205524	0.034254
GO_INTERLEUKIN_12_PRODUCTION	Irf8:Ifng	up	2	1	0.00205524	0.034254
GO_NEGATIVE_REGULATION_OF_CELL_ADHESION	Tbx21:Il2:Mmp14:Prnp:Socs1	up	5	2	0.00206031	0.0342608
GO_REGULATION_OF_STRIATED_MUSCLE_CELL_DIFFERENTIATION	Ezh2:Cxcl10:Mmp14	up	3	1	0.00206711	0.0342963
GO_B_CELL_PROLIFERATION	Lef1:Bcl6	down	2	1	0.000906755	0.0343539
GO_POSITIVE_REGULATION_OF_LYMPHOCYTE_DIFFERENTIATION	Bcl6:Cd27	down	2	1	0.000906755	0.0343539
GO_NEGATIVE_REGULATION_OF_CELLULAR_SENESCENCE	Bcl6	down	1	1	0.000921371	0.034376
GO_DORSAL_SPINAL_CORD_DEVELOPMENT	Lmo4	down	1	1	0.000921371	0.034376
GO_INTERLEUKIN_5_PRODUCTION	Lef1	down	1	1	0.000921371	0.034376
GO_REGULATION_OF_PROTEIN_LOCALIZATION	Rhoq:Gpld1:Gpm6b:Ifng:Il2:Mmp14:Prnp:Ccl1:Ifih1:Arhgef5:Socs1	up	11	5	0.00208972	0.0345933
GO_REGULATION_OF_PODOSOME_ASSEMBLY	Arhgef5	up	1	1	0.00217772	0.034872
GO_POSITIVE_REGULATION_OF_HORMONE_METABOLIC_PROCESS	Ifng	up	1	1	0.00217772	0.034872
GO_CELL_MIGRATION_INVOLVED_IN_GASTRULATION	Megf8	up	1	1	0.00217772	0.034872
GO_VENOUS_BLOOD_VESSEL_DEVELOPMENT	Bmpr2	up	1	1	0.00217772	0.034872
GO_SEROTONIN_TRANSPORT	Gpm6b	up	1	1	0.00217772	0.034872
GO_REGULATION_OF_KETONE_BIOSYNTHETIC_PROCESS	Dkkl1	up	1	1	0.00217772	0.034872
GO_PROTEIN_OXIDATION	Loxl2	up	1	1	0.00217772	0.034872
GO_ENTRY_OF_BACTERIUM_INTO_HOST_CELL	Ctnnd1	up	1	1	0.00217772	0.034872
GO_FAT_SOLUBLE_VITAMIN_BIOSYNTHETIC_PROCESS	Ifng	up	1	1	0.00217772	0.034872
GO_ACTIVATION_OF_JANUS_KINASE_ACTIVITY	Socs1	up	1	1	0.00217772	0.034872
GO_REGULATION_OF_KILLING_OF_CELLS_OF_OTHER_ORGANISM	Ifng	up	1	1	0.00217772	0.034872
GO_POSITIVE_REGULATION_OF_TUMOR_NECROSIS_FACTOR_SECRETION	Ifih1	up	1	1	0.00217772	0.034872
GO_REGULATION_OF_CD8_POSITIVE_ALPHA_BETA_T_CELL_ACTIVATION	Socs1	up	1	1	0.00217772	0.034872
GO_POSITIVE_REGULATION_OF_DEPHOSPHORYLATION	Gpld1:Ifng	up	2	1	0.00216654	0.034872
GO_OSSIFICATION	Gpld1:Gpm6b:Mmp14:Bmpr2:Sema7a:Tnfsf11	up	6	2	0.00214831	0.034872
GO_AXON_EXTENSION	Megf8:Bmpr2:Sema7a	up	3	1	0.00220117	0.0351709
GO_REGULATION_OF_ACTOMYOSIN_STRUCTURE_ORGANIZATION	S1pr1:Stmn1	down	2	1	0.000964477	0.0358025
GO_IMMUNOGLOBULIN_PRODUCTION_INVOLVED_IN_IMMUNOGLOBULIN_MEDIATED_IMMUNE_RESPONSE	Tbx21:Il2	up	2	1	0.00228152	0.0363756
GO_CELL_JUNCTION_ORGANIZATION	Ctnnd1:Gpm6b:Rhoc:Lama5:Mmp14	up	5	2	0.00228923	0.0364195
GO_PIGMENTATION	Bcl2l11:Lef1	down	2	1	0.000994191	0.0367201
GO_NEGATIVE_REGULATION_OF_CELL_CYCLE_ARREST	Evi2b	down	1	1	0.00100782	0.0368531
GO_FIBROBLAST_APOPTOTIC_PROCESS	Bcl2l11	down	1	1	0.00100782	0.0368531
GO_NEGATIVE_REGULATION_OF_CELL_DIFFERENTIATION	Ezh2:Tmem176b:Tbx21:Ifng:Il2:Cxcl10:Tmem176a:Sema7a:Socs1	up	9	4	0.00233078	0.0370005
GO_CHONDROCYTE_DIFFERENTIATION	Gpld1:Loxl2:Bmpr2	up	3	1	0.00234112	0.0370846
GO_CONTRACTILE_ACTIN_FILAMENT_BUNDLE_ASSEMBLY	S1pr1:Stmn1	down	2	1	0.00102448	0.0370932
GO_REGULATION_OF_ACTIN_FILAMENT_BUNDLE_ASSEMBLY	S1pr1:Stmn1	down	2	1	0.00102448	0.0370932
GO_REGULATION_OF_T_CELL_CHEMOTAXIS	Cxcl10	up	1	1	0.00248129	0.0376031
GO_REGULATION_OF_RETINOIC_ACID_RECEPTOR_SIGNALING_PATHWAY	Ezh2	up	1	1	0.00248129	0.0376031
GO_REGULATION_OF_BROWN_FAT_CELL_DIFFERENTIATION	Metrnl	up	1	1	0.00248129	0.0376031
GO_MORPHOGENESIS_OF_AN_ENDOTHELIUM	Cxcl10	up	1	1	0.00248129	0.0376031
GO_ATRIAL_SEPTUM_MORPHOGENESIS	Bmpr2	up	1	1	0.00248129	0.0376031
GO_LYMPHANGIOGENESIS	Bmpr2	up	1	1	0.00248129	0.0376031
GO_REGULATION_OF_EXOSOMAL_SECRETION	Ifng	up	1	1	0.00248129	0.0376031
GO_REGULATION_OF_GLUTAMATE_SECRETION	Stxbp1	up	1	1	0.00248129	0.0376031
GO_C_TERMINAL_PROTEIN_AMINO_ACID_MODIFICATION	Gpld1	up	1	1	0.00248129	0.0376031
GO_REGULATION_OF_ER_TO_GOLGI_VESICLE_MEDIATED_TRANSPORT	Gas1	up	1	1	0.00248129	0.0376031
GO_NEUTROPHIL_HOMEOSTASIS	Axl	up	1	1	0.00248129	0.0376031
GO_MACROPHAGE_CYTOKINE_PRODUCTION	Sema7a	up	1	1	0.00248129	0.0376031
GO_PROSTAGLANDIN_TRANSPORT	Tnfsf11	up	1	1	0.00248129	0.0376031
GO_ESTABLISHMENT_OR_MAINTENANCE_OF_CYTOSKELETON_POLARITY	Rhoc	up	1	1	0.00248129	0.0376031
GO_3_UTR_MEDIATED_MRNA_DESTABILIZATION	Mov10	up	1	1	0.00248129	0.0376031
GO_INTESTINAL_LIPID_ABSORPTION	Lima1	up	1	1	0.00248129	0.0376031
GO_NEURAL_CREST_CELL_MIGRATION	Lama5:Sema7a	up	2	1	0.00240021	0.0376031
GO_REGULATION_OF_PROTEIN_IMPORT	Ifng:Arhgef5	up	2	1	0.00240021	0.0376031
GO_LEUKOCYTE_PROLIFERATION	Ebi3:Il2:Prnp:Tnfsf11:Ms4a1	up	5	2	0.00245218	0.0376031
GO_RESPONSE_TO_PEPTIDE	Foxo6:Cish:Rhoq:Gpld1:Prnp:Socs1:Socs2	up	7	3	0.00245922	0.0376031
GO_ACTIN_FILAMENT_BASED_PROCESS	Fgd1:Rhoq:Gpm6b:Rhoc:Myo6:Lima1:Arhgef5:Ina:Trip10	up	9	4	0.00240017	0.0376031
GO_REGULATION_OF_LEUKOCYTE_MEDIATED_IMMUNITY	Tbx21:Il2:Lta:Stxbp1	up	4	1	0.00250873	0.0378628
GO_RHO_PROTEIN_SIGNAL_TRANSDUCTION	Fgd1:Rhoq:Rhoc:Arhgef5	up	4	1	0.00250873	0.0378628
GO_REGULATION_OF_ORGANIC_ACID_TRANSPORT	Stxbp1:Tnfsf11	up	2	1	0.00252267	0.0379952
GO_REGULATION_OF_WATER_LOSS_VIA_SKIN	Stmn1	down	1	1	0.00109802	0.0384308
GO_PYRIMIDINE_CONTAINING_COMPOUND_METABOLIC_PROCESS	Dck	down	1	1	0.00109802	0.0384308
GO_SOMATIC_STEM_CELL_DIVISION	Lef1	down	1	1	0.00109802	0.0384308
GO_NEGATIVE_REGULATION_OF_ALPHA_BETA_T_CELL_DIFFERENTIATION	Bcl6	down	1	1	0.00109802	0.0384308
GO_INTERLEUKIN_13_PRODUCTION	Lef1	down	1	1	0.00109802	0.0384308
GO_SECONDARY_PALATE_DEVELOPMENT	Lef1	down	1	1	0.00109802	0.0384308
GO_PHOSPHOLIPASE_C_ACTIVATING_G_PROTEIN_COUPLED_RECEPTOR_SIGNALING_PATHWAY	S1pr1:Gpr174	down	2	1	0.0010868	0.0384308
GO_RESPONSE_TO_STEROID_HORMONE	Bcl2l11:Ephx1:Acsbg1:Lef1	down	4	1	0.00110475	0.038483
GO_T_CELL_ACTIVATION_INVOLVED_IN_IMMUNE_RESPONSE	Lef1:Bcl6	down	2	1	0.00111884	0.0387899
GO_MEMBRANE_PROTEIN_PROTEOLYSIS	Gpld1:Ifng	up	2	1	0.00264893	0.039653
GO_FILOPODIUM_ASSEMBLY	Fgd1:Rhoq	up	2	1	0.00264893	0.039653
GO_POSITIVE_REGULATION_OF_LEUKOCYTE_MIGRATION	Cxcl10:Mmp14:Ccl1	up	3	1	0.00263919	0.039653
GO_NEGATIVE_REGULATION_OF_CYTOKINE_PRODUCTION_INVOLVED_IN_IMMUNE_RESPONSE	Bcl6	down	1	1	0.00119197	0.0401878
GO_POSITIVE_REGULATION_OF_PROTEIN_OLIGOMERIZATION	Bcl2l11	down	1	1	0.00119197	0.0401878
GO_MATURE_B_CELL_DIFFERENTIATION	Itm2a	down	1	1	0.00119197	0.0401878
GO_REGULATION_OF_ENDOPLASMIC_RETICULUM_UNFOLDED_PROTEIN_RESPONSE	Bcl2l11	down	1	1	0.00119197	0.0401878
GO_LEUKOCYTE_TETHERING_OR_ROLLING	Sell	down	1	1	0.00119197	0.0401878
GO_NEGATIVE_REGULATION_OF_PROTEIN_BINDING	Stmn1:Lef1	down	2	1	0.0011847	0.0401878
GO_NEGATIVE_REGULATION_OF_MYOTUBE_DIFFERENTIATION	Cxcl10	up	1	1	0.00280362	0.0406442
GO_NEGATIVE_REGULATION_OF_EPIDERMIS_DEVELOPMENT	Ezh2	up	1	1	0.00280362	0.0406442
GO_CELLULAR_RESPONSE_TO_EXOGENOUS_DSRNA	Ifih1	up	1	1	0.00280362	0.0406442
GO_COPPER_ION_HOMEOSTASIS	Prnp	up	1	1	0.00280362	0.0406442
GO_WOUND_HEALING_SPREADING_OF_EPIDERMAL_CELLS	Hbegf	up	1	1	0.00280362	0.0406442
GO_FEMALE_GENITALIA_DEVELOPMENT	Axl	up	1	1	0.00280362	0.0406442
GO_SYNAPTIC_VESICLE_PRIMING	Stxbp1	up	1	1	0.00280362	0.0406442
GO_HEAT_GENERATION	Tnfsf11	up	1	1	0.00280362	0.0406442
GO_HIGH_DENSITY_LIPOPROTEIN_PARTICLE_CLEARANCE	Gpld1	up	1	1	0.00280362	0.0406442
GO_INTERFERON_GAMMA_BIOSYNTHETIC_PROCESS	Ebi3	up	1	1	0.00280362	0.0406442
GO_REGULATION_OF_CYTOLYSIS	Gpld1	up	1	1	0.00280362	0.0406442
GO_CD4_POSITIVE_ALPHA_BETA_T_CELL_LINEAGE_COMMITMENT	Tbx21	up	1	1	0.00280362	0.0406442
GO_POSITIVE_REGULATION_OF_BONE_RESORPTION	Tnfsf11	up	1	1	0.00280362	0.0406442
GO_POSITIVE_REGULATION_OF_CYTOKINE_PRODUCTION_INVOLVED_IN_INFLAMMATORY_RESPONSE	Gbp5	up	1	1	0.00280362	0.0406442
GO_NEGATIVE_REGULATION_OF_VIRAL_GENOME_REPLICATION	Ifitm3:Ifitm2	up	2	1	0.00277903	0.0406442
GO_SOMATIC_DIVERSIFICATION_OF_IMMUNE_RECEPTORS_VIA_GERMLINE_RECOMBINATION_WITHIN_A_SINGLE_LOCUS	Tbx21:Il2	up	2	1	0.00277903	0.0406442
GO_SKELETAL_SYSTEM_DEVELOPMENT	Irx5:Megf8:Gpld1:Loxl2:Mmp14:Bmpr2:Tnfsf11	up	7	3	0.00284077	0.0411016
GO_REGULATION_OF_CYSTEINE_TYPE_ENDOPEPTIDASE_ACTIVITY	Bcl2l11:Lef1:Cd27	down	3	1	0.00123873	0.0415739
GO_EMBRYONIC_SKELETAL_SYSTEM_DEVELOPMENT	Irx5:Megf8:Mmp14	up	3	1	0.00287916	0.0415753
GO_REGULATION_OF_MYOTUBE_DIFFERENTIATION	Cxcl10:Mmp14	up	2	1	0.00291301	0.0419816
GO_REGULATION_OF_RECEPTOR_BINDING	Lef1	down	1	1	0.00128963	0.042316
GO_REGULATION_OF_POSITIVE_CHEMOTAXIS	S1pr1	down	1	1	0.00128963	0.042316
GO_NEGATIVE_REGULATION_OF_DNA_DEPENDENT_DNA_REPLICATION	Bcl6	down	1	1	0.00128963	0.042316
GO_EMBRYONIC_PLACENTA_MORPHOGENESIS	Lef1	down	1	1	0.00128963	0.042316
GO_REGULATION_OF_RAS_PROTEIN_SIGNAL_TRANSDUCTION	Stmn1:Bcl6:Gpr174	down	3	1	0.00127876	0.042316
GO_ENDOTHELIUM_DEVELOPMENT	Cxcl10:Lama5:Bmpr2	up	3	1	0.00296236	0.0426093
GO_POSITIVE_REGULATION_OF_ACTIN_FILAMENT_BUNDLE_ASSEMBLY	Rhoc:Arhgef5	up	2	1	0.0030509	0.0437117
GO_RESPONSE_TO_ESTRADIOL	Ezh2:Stxbp1:Socs2	up	3	1	0.00304719	0.0437117
GO_TRANSEPITHELIAL_TRANSPORT	Gpld1	up	1	1	0.00314454	0.0441075
GO_REGULATION_OF_B_CELL_APOPTOTIC_PROCESS	Il2	up	1	1	0.00314454	0.0441075
GO_CHRONIC_INFLAMMATORY_RESPONSE	Lta	up	1	1	0.00314454	0.0441075
GO_RETINA_VASCULATURE_DEVELOPMENT_IN_CAMERA_TYPE_EYE	Bmpr2	up	1	1	0.00314454	0.0441075
GO_POSITIVE_REGULATION_OF_HUMORAL_IMMUNE_RESPONSE	Lta	up	1	1	0.00314454	0.0441075
GO_HETEROCHROMATIN_ORGANIZATION	Loxl2	up	1	1	0.00314454	0.0441075
GO_POSITIVE_REGULATION_OF_AMINO_ACID_TRANSPORT	Stxbp1	up	1	1	0.00314454	0.0441075
GO_NEGATIVE_REGULATION_OF_CALCINEURIN_MEDIATED_SIGNALING	Prnp	up	1	1	0.00314454	0.0441075
GO_NEURON_PROJECTION_ARBORIZATION	Mov10	up	1	1	0.00314454	0.0441075
GO_POSITIVE_REGULATION_OF_FATTY_ACID_TRANSPORT	Tnfsf11	up	1	1	0.00314454	0.0441075
GO_POSITIVE_REGULATION_OF_TRANSFERASE_ACTIVITY	Ezh2:Ifng:Il2:Prnp:Arhgef5:Tnfsf11:Socs1:Maged1	up	8	4	0.00311041	0.0441075
GO_BONE_DEVELOPMENT	Megf8:Mmp14:Bmpr2:Tnfsf11	up	4	1	0.00315514	0.0441719
GO_NEGATIVE_REGULATION_OF_MUSCLE_CELL_DIFFERENTIATION	Ezh2:Cxcl10	up	2	1	0.00319274	0.0444444
GO_POSITIVE_REGULATION_OF_PROTEIN_LOCALIZATION_TO_CELL_PERIPHERY	Ifng:Prnp	up	2	1	0.00319274	0.0444444
GO_INTERLEUKIN_2_PRODUCTION	Tbx21:Prnp	up	2	1	0.00319274	0.0444444
GO_ENZYME_LINKED_RECEPTOR_PROTEIN_SIGNALING_PATHWAY	Foxo6:Rbpms:Cish:Hbegf:Megf8:Rhoq:Gpld1:Axl:Bmpr2:Socs1:Socs2	up	11	5	0.0032094	0.0445919
GO_REGULATION_OF_HISTONE_DEACETYLATION	Bcl6	down	1	1	0.00139101	0.0450392
GO_NEGATIVE_REGULATION_OF_CD4_POSITIVE_ALPHA_BETA_T_CELL_ACTIVATION	Bcl6	down	1	1	0.00139101	0.0450392
GO_ORGANISM_EMERGENCE_FROM_PROTECTIVE_STRUCTURE	St8sia6	down	1	1	0.00139101	0.0450392
GO_REGULATION_OF_NEURON_DIFFERENTIATION	Foxo6:Megf8:Ezh2:Il2:Mov10:Bmpr2:Sema7a:Socs2	up	8	4	0.00327357	0.0453976
GO_REGULATION_OF_OSTEOCLAST_DIFFERENTIATION	Ifng:Tnfsf11	up	2	1	0.00333858	0.0461251
GO_POSITIVE_REGULATION_OF_FAT_CELL_DIFFERENTIATION	Dkkl1:Metrnl	up	2	1	0.00333858	0.0461251
GO_REGULATION_OF_ICOSANOID_SECRETION	Tnfsf11	up	1	1	0.00350386	0.0466485
GO_NEGATIVE_REGULATION_OF_ADHERENS_JUNCTION_ORGANIZATION	Mmp14	up	1	1	0.00350386	0.0466485
GO_LIPID_DIGESTION	Lima1	up	1	1	0.00350386	0.0466485
GO_POSITIVE_REGULATION_OF_ALPHA_BETA_T_CELL_PROLIFERATION	Ebi3	up	1	1	0.00350386	0.0466485
GO_POSITIVE_REGULATION_OF_MAST_CELL_ACTIVATION	Stxbp1	up	1	1	0.00350386	0.0466485
GO_LYMPH_VESSEL_MORPHOGENESIS	Bmpr2	up	1	1	0.00350386	0.0466485
GO_NEGATIVE_REGULATION_OF_T_CELL_MEDIATED_IMMUNITY	Tbx21	up	1	1	0.00350386	0.0466485
GO_POSITIVE_REGULATION_OF_MYELOID_LEUKOCYTE_CYTOKINE_PRODUCTION_INVOLVED_IN_IMMUNE_RESPONSE	Sema7a	up	1	1	0.00350386	0.0466485
GO_ALPHA_BETA_T_CELL_LINEAGE_COMMITMENT	Tbx21	up	1	1	0.00350386	0.0466485
GO_LONG_CHAIN_FATTY_ACYL_COA_BIOSYNTHETIC_PROCESS	Elovl6	up	1	1	0.00350386	0.0466485
GO_SNARE_COMPLEX_ASSEMBLY	Stxbp1	up	1	1	0.00350386	0.0466485
GO_OSTEOCLAST_DEVELOPMENT	Tnfsf11	up	1	1	0.00350386	0.0466485
GO_KERATINOCYTE_MIGRATION	Hbegf	up	1	1	0.00350386	0.0466485
GO_CELL_PROLIFERATION_INVOLVED_IN_HEART_MORPHOGENESIS	Bmpr2	up	1	1	0.00350386	0.0466485
GO_HISTONE_H3_K27_METHYLATION	Ezh2	up	1	1	0.00350386	0.0466485
GO_PODOSOME_ASSEMBLY	Arhgef5	up	1	1	0.00350386	0.0466485
GO_POSITIVE_REGULATION_OF_MACROPHAGE_MIGRATION	Mmp14	up	1	1	0.00350386	0.0466485
GO_PATHWAY_RESTRICTED_SMAD_PROTEIN_PHOSPHORYLATION	Rbpms:Bmpr2	up	2	1	0.00348843	0.0466485
GO_MESENCHYMAL_CELL_DIFFERENTIATION	Ezh2:Lama5:Loxl2:Sema7a	up	4	2	0.00348554	0.0466485
GO_EPITHELIAL_TUBE_MORPHOGENESIS	Megf8:Cxcl10:Lama5:Mmp14:Maged1	up	5	2	0.00350975	0.0466485
GO_REGULATION_OF_NERVOUS_SYSTEM_DEVELOPMENT	Foxo6:Megf8:Ezh2:Il2:Lta:Mov10:Bmpr2:Tpbg:Sema7a:Socs2	up	10	5	0.00341762	0.0466485
GO_CELL_CELL_SIGNALING	Ctnnd1:Dkkl1:Gpld1:Ifng:Il2:Il3:Cxcl10:Kpna1:Lta:Mov10:Pcdh8:Axl:Prnp:Stxbp1:Tnfsf11	up	15	8	0.00354845	0.0470778
GO_REGULATION_OF_INTERLEUKIN_4_PRODUCTION	Lef1	down	1	1	0.00149608	0.0473973
GO_NEGATIVE_REGULATION_OF_CELL_AGING	Bcl6	down	1	1	0.00149608	0.0473973
GO_PROTEIN_KINASE_C_ACTIVATING_G_PROTEIN_COUPLED_RECEPTOR_SIGNALING_PATHWAY	Dgka	down	1	1	0.00149608	0.0473973
GO_MODULATION_OF_TRANSCRIPTION_IN_OTHER_ORGANISM_INVOLVED_IN_SYMBIOTIC_INTERACTION	Lef1	down	1	1	0.00149608	0.0473973
GO_REGULATION_OF_B_CELL_DIFFERENTIATION	Cd27	down	1	1	0.00149608	0.0473973
GO_REGULATION_OF_SECRETION	Gpld1:Ifng:Il2:Myo6:Ccl1:Ifih1:Stxbp1:Tnfsf11:Socs1	up	9	4	0.00362398	0.0479932
GO_REGULATION_OF_IMMUNOGLOBULIN_PRODUCTION	Tbx21:Il2	up	2	1	0.00364235	0.0480633
GO_ENDOTHELIAL_CELL_APOPTOTIC_PROCESS	Cd248:Bmpr2	up	2	1	0.00364235	0.0480633
GO_EMBRYO_DEVELOPMENT_ENDING_IN_BIRTH_OR_EGG_HATCHING	Bcl2l11:St8sia6:Lef1:Tcf7:Lmo4	down	5	2	0.0015351	0.0484247
GO_MODIFICATION_OF_MORPHOLOGY_OR_PHYSIOLOGY_OF_OTHER_ORGANISM_INVOLVED_IN_SYMBIOTIC_INTERACTION	Bcl2l11:Lef1	down	2	1	0.00155067	0.0487071
GO_CYTOKINE_SECRETION	Gbp5:Ccl1:Ifih1:Socs1	up	4	2	0.00376726	0.0495337
GO_RESPONSE_TO_PEPTIDE_HORMONE	Foxo6:Cish:Rhoq:Gpld1:Socs1:Socs2	up	6	2	0.00376557	0.0495337
GO_NEGATIVE_REGULATION_OF_T_CELL_RECEPTOR_SIGNALING_PATHWAY	Prnp	up	1	1	0.00388141	0.0496812
GO_ATRIAL_SEPTUM_DEVELOPMENT	Bmpr2	up	1	1	0.00388141	0.0496812
GO_NEGATIVE_REGULATION_OF_SYSTEMIC_ARTERIAL_BLOOD_PRESSURE	Bmpr2	up	1	1	0.00388141	0.0496812
GO_RESPONSE_TO_PROTOZOAN	Irf8	up	1	1	0.00388141	0.0496812
GO_CELLULAR_RESPONSE_TO_CHOLESTEROL	Gpld1	up	1	1	0.00388141	0.0496812
GO_REGULATION_OF_PROTEIN_HOMOOLIGOMERIZATION	Rhoc	up	1	1	0.00388141	0.0496812
GO_REGULATION_OF_NEUROTRANSMITTER_UPTAKE	Gpm6b	up	1	1	0.00388141	0.0496812
GO_REGULATION_OF_TRIGLYCERIDE_BIOSYNTHETIC_PROCESS	Gpld1	up	1	1	0.00388141	0.0496812
GO_POSITIVE_REGULATION_OF_SMOOTH_MUSCLE_CELL_APOPTOTIC_PROCESS	Ifng	up	1	1	0.00388141	0.0496812
GO_CD4_POSITIVE_ALPHA_BETA_T_CELL_CYTOKINE_PRODUCTION	Tbx21	up	1	1	0.00388141	0.0496812
GO_EOSINOPHIL_CHEMOTAXIS	Ccl1	up	1	1	0.00388141	0.0496812
GO_POSITIVE_REGULATION_OF_GLIAL_CELL_PROLIFERATION	Lta	up	1	1	0.00388141	0.0496812
GO_DENDRITIC_SPINE_MAINTENANCE	Prnp	up	1	1	0.00388141	0.0496812
GO_REGULATION_OF_ADHERENS_JUNCTION_ORGANIZATION	Gpm6b:Mmp14	up	2	1	0.00380036	0.0496812
GO_MESONEPHRIC_TUBULE_MORPHOGENESIS	Lama5:Maged1	up	2	1	0.00380036	0.0496812
GO_POSITIVE_REGULATION_OF_B_CELL_ACTIVATION	Tbx21:Il2:Mmp14	up	3	1	0.00388662	0.0496812

## Sheet: MSigDB Immune
Pathway	genes	geneset_direction	genes_observed	gene_expected	hyper_p.val	hyper_fdr
GSE14699_NAIVE_VS_DELETIONAL_TOLERANCE_CD8_TCELL_DN	Lef1:Dapl1:Pou2af1:Lmo4:Tcf7:Dgka:Bcl2l11:Ikzf1:Prg4:Itm2a:Gpr171:S1pr1	down	12	1	9.04376e-18	4.40612e-14
GSE13522_CTRL_VS_T_CRUZI_Y_STRAIN_INF_SKIN_BALBC_MOUSE_DN	Itm2a:Nsg2:Lmo4:Lef1:Tcf7:Prg4:St8sia6:Tubb2b:Ugcg:Sell	down	10	1	2.10881e-15	5.13706e-12
GSE3565_CTRL_VS_LPS_INJECTED_DUSP1_KO_SPLENOCYTES_DN	Tcf7:Sell:Dgka:Sesn1:Dapl1:Lef1:Nsg2:Ikzf1:Itm2a:Ephx1	down	10	1	1.37814e-14	1.67857e-11
GSE7219_UNSTIM_VS_LPS_AND_ANTI_CD40_STIM_DC_UP	Tcf7:Sell:Lef1:Bcl2l11:Cpm:S1pr1:Dgka:Dapl1:Cd27:Nsg2	down	10	1	1.37814e-14	1.67857e-11
GSE3565_DUSP1_VS_WT_SPLENOCYTES_DN	Tcf7:Nsg2:Sell:Lef1:Dapl1:Dgka:Ikzf1:Cd27:Tubb2a	down	9	1	7.0467e-13	6.8663e-10
GSE5455_HEALTHY_VS_TUMOR_BEARING_MOUSE_SPLEEN_MONOCYTE_DN	Cpm:St8sia6:Sytl2:Gpr34:Acsbg1:Ctsw:Bcl2l11:Dapl1:B4galnt1	down	9	1	1.30943e-12	9.11365e-10
GSE40068_CXCR5POS_BCL6POS_TFH_VS_CXCR5NEG_BCL6NEG_CD4_TCELL_DN	Dapl1:Lef1:Tcf7:St8sia6:Ephx1:Itm2a:Ikzf1:Tubb2b:Sesn1	down	9	1	1.30943e-12	9.11365e-10
GSE2935_UV_INACTIVATED_VS_LIVE_SENDAI_VIRUS_INF_MACROPHAGE_UP	Lef1:Ikzf1:Tcf7:Ephx1:Sell:Dapl1:Dgka:Tubb2a	down	8	1	2.5602e-11	1.38592e-08
GSE15330_HSC_VS_MEGAKARYOCYTE_ERYTHROID_PROGENITOR_UP	Sesn1:Nsg2:Tcf7:Dapl1:Lef1:Sell:Ephx1:S1pr1	down	8	1	2.5602e-11	1.38592e-08
GSE3565_CTRL_VS_LPS_INJECTED_SPLENOCYTES_DN	Cd27:Dgka:Lef1:Nsg2:Tcf7:Dapl1:Itm2a:Sesn1	down	8	1	3.10205e-11	1.51132e-08
KAECH_NAIVE_VS_DAY8_EFF_CD8_TCELL_UP	Nsg2:Sesn1:Ephx1:Sell:Tcf7:Lef1:Dgka:Pou2af1	down	8	1	5.14908e-11	1.67242e-08
GSE17580_TREG_VS_TEFF_S_MANSONI_INF_DN	Tubb2a:S1pr1:Lmo4:Ctsw:Evi2b:Itm2a:Ugcg:Lef1	down	8	1	5.14908e-11	1.67242e-08
GSE26669_CTRL_VS_COSTIM_BLOCK_MLR_CD4_TCELL_DN	S1pr1:St8sia6:Lmo4:Cd27:Prg4:Evi2b:Lef1:Sh3bgrl2	down	8	1	5.14908e-11	1.67242e-08
GSE23568_ID3_TRANSDUCED_VS_ID3_KO_CD8_TCELL_UP	Ctsw:Itm2a:Dgka:Cd27:Tcf7:Nsg2:B4galnt1:Stmn1	down	8	1	5.14908e-11	1.67242e-08
GSE23568_CTRL_TRANSDUCED_VS_WT_CD8_TCELL_DN	Cd27:Tcf7:Sell:Stmn1:Ctsw:Nsg2:Itm2a:Dgka	down	8	1	5.14908e-11	1.67242e-08
GSE3920_IFNB_VS_IFNG_TREATED_ENDOTHELIAL_CELL_UP	Tcf7:Dapl1:St8sia6:Lef1:Cpm:Stmn1:Nsg2	down	7	1	7.26607e-10	2.08237e-07
GSE14699_NAIVE_VS_DELETIONAL_TOLERANCE_CD8_TCELL_UP	Nsg2:Lef1:Sesn1:Tcf7:Ephx1:Prg4:Dapl1	down	7	1	7.26607e-10	2.08237e-07
GSE40274_CTRL_VS_FOXP3_AND_LEF1_TRANSDUCED_ACTIVATED_CD4_TCELL_UP	Lef1:Cd27:B4galnt1:Lmo4:Dapl1:Itm2a:Ctsw	down	7	1	8.29091e-10	2.24407e-07
KAECH_NAIVE_VS_DAY15_EFF_CD8_TCELL_UP	Nsg2:Sell:Sesn1:Ephx1:Dgka:Lef1:Lmo4	down	7	1	1.74931e-09	2.58262e-07
GOLDRATH_NAIVE_VS_EFF_CD8_TCELL_UP	Dgka:Bcl6:Lef1:Sesn1:Ephx1:Sell:Tcf7	down	7	1	1.74931e-09	2.58262e-07
GOLDRATH_EFF_VS_MEMORY_CD8_TCELL_DN	Sesn1:Dgka:Tcf7:Sell:Nsg2:Bcl2l11:Ctsw	down	7	1	1.74931e-09	2.58262e-07
GSE17580_TREG_VS_TEFF_UP	Acsbg1:Ephx1:Sesn1:Sh3bgrl2:Prg4:Sytl2:Tmem158	down	7	1	1.74931e-09	2.58262e-07
GSE22886_NAIVE_CD4_TCELL_VS_MONOCYTE_UP	Gpr171:S1pr1:Itm2a:Cd27:Sesn1:Lef1:Dgka	down	7	1	1.5524e-09	2.58262e-07
GSE30083_SP2_VS_SP3_THYMOCYTE_DN	S1pr1:Evi2b:Dck:St8sia6:Sell:Acsbg1:Lmo4	down	7	1	1.74931e-09	2.58262e-07
GSE5679_CTRL_VS_PPARG_LIGAND_ROSIGLITAZONE_AND_RARA_AGONIST_AM580_TREATED_DC_DN	Bcl2l11:Itm2a:Stmn1:S1pr1:Ephx1:Dgka:Sesn1	down	7	1	1.74931e-09	2.58262e-07
GSE5679_RARA_AGONIST_AM580_VS_AM580_AND_ROSIGLITAZONE_TREATED_DC_DN	Cpm:Acsbg1:S1pr1:St8sia6:Sytl2:Gpr34:B4galnt1	down	7	1	1.74931e-09	2.58262e-07
GSE6674_ANTI_IGM_VS_ANTI_IGM_AND_CPG_STIM_BCELL_UP	Dgka:Tubb2b:Tcf7:Sesn1:Bcl6:Tubb2a:Ephx1	down	7	1	1.74931e-09	2.58262e-07
GSE7831_UNSTIM_VS_CPG_STIM_PDC_4H_UP	Ephx1:Nsg2:Tcf7:Ctsw:Ugcg:Dgka:Lef1	down	7	1	1.74931e-09	2.58262e-07
GSE7219_UNSTIM_VS_LPS_AND_ANTI_CD40_STIM_NIK_NFKB2_KO_DC_UP	Dgka:Nsg2:Dapl1:Tcf7:S1pr1:Lef1:Sell	down	7	1	1.21547e-09	2.58262e-07
GSE14699_NAIVE_VS_ACT_CD8_TCELL_DN	Sesn1:Nsg2:Itm2a:Lef1:Tcf7:Ephx1:Dapl1	down	7	1	1.21547e-09	2.58262e-07
GSE14415_FOXP3_KO_NATURAL_TREG_VS_TCONV_DN	Sesn1:Lef1:Sell:Nsg2:Tcf7:Dapl1:Ephx1	down	7	1	1.02787e-09	2.58262e-07
GSE16451_CTRL_VS_WEST_EQUINE_ENC_VIRUS_IMMATURE_NEURON_CELL_LINE_UP	Tcf7:Pou2af1:Ikzf1:Lef1:Lmo4:Dapl1:Evi2b	down	7	1	1.74931e-09	2.58262e-07
GSE39110_UNTREATED_VS_IL2_TREATED_CD8_TCELL_DAY6_POST_IMMUNIZATION_DN	Tcf7:Ephx1:St8sia6:Bcl6:Tmem158:Pou2af1:Dapl1	down	7	1	1.74931e-09	2.58262e-07
GSE40274_CTRL_VS_EOS_TRANSDUCED_ACTIVATED_CD4_TCELL_DN	Nsg2:Tcf7:Dapl1:Sell:Pou2af1:Dgka	down	6	1	1.34905e-08	1.93311e-06
GSE32901_NAIVE_VS_TH17_ENRICHED_CD4_TCELL_UP	S1pr1:Sell:St8sia6:Lef1:Dapl1:Nsg2	down	6	1	1.6586e-08	2.30878e-06
GSE10325_CD4_TCELL_VS_MYELOID_UP	Gpr171:Lef1:Dgka:Tcf7:S1pr1:Itm2a	down	6	1	4.90752e-08	3.58634e-06
GSE10325_LUPUS_CD4_TCELL_VS_LUPUS_MYELOID_UP	Gpr171:Cd27:Lef1:Itm2a:Tcf7:S1pr1	down	6	1	4.74081e-08	3.58634e-06
GSE1448_CTRL_VS_ANTI_VBETA5_DP_THYMOCYTE_DN	Itm2a:Lef1:Ephx1:Pou2af1:Cd27:B4galnt1	down	6	1	5.07917e-08	3.58634e-06
GSE15733_BM_VS_SPLEEN_MEMORY_CD4_TCELL_DN	Ephx1:Pou2af1:Dck:Tcf7:Itm2a:Nsg2	down	6	1	5.07917e-08	3.58634e-06
GSE17580_UNINFECTED_VS_S_MANSONI_INF_TREG_UP	Sell:S1pr1:Sesn1:Itm2a:Ugcg:Lmo4	down	6	1	4.90752e-08	3.58634e-06
GSE20366_TREG_VS_NAIVE_CD4_TCELL_DEC205_CONVERSION_UP	Gpr34:Sytl2:Ephx1:Sesn1:Sell:Acsbg1	down	6	1	5.07917e-08	3.58634e-06
GSE30083_SP1_VS_SP4_THYMOCYTE_DN	S1pr1:St8sia6:Acsbg1:Ctsw:Sesn1:Dapl1	down	6	1	5.07917e-08	3.58634e-06
GSE30083_SP2_VS_SP4_THYMOCYTE_DN	Evi2b:St8sia6:Acsbg1:Dapl1:S1pr1:Prg4	down	6	1	5.07917e-08	3.58634e-06
GSE30083_SP3_VS_SP4_THYMOCYTE_DN	St8sia6:Acsbg1:Prg4:Ephx1:Evi2b:Ctsw	down	6	1	5.07917e-08	3.58634e-06
GSE7460_FOXP3_MUT_VS_WT_ACT_TCONV_DN	Ephx1:Sell:Dapl1:S1pr1:Lef1:Tcf7	down	6	1	5.07917e-08	3.58634e-06
GSE9650_NAIVE_VS_EFF_CD8_TCELL_UP	Tcf7:Sesn1:Sell:Nsg2:Dgka:Ephx1	down	6	1	5.07917e-08	3.58634e-06
GSE9650_NAIVE_VS_MEMORY_CD8_TCELL_UP	Sesn1:Ephx1:Pou2af1:Nsg2:Ugcg:Dck	down	6	1	5.07917e-08	3.58634e-06
GSE2405_0H_VS_12H_A_PHAGOCYTOPHILUM_STIM_NEUTROPHIL_UP	Dapl1:Sell:B4galnt1:Ctsw:S1pr1:Ephx1	down	6	1	5.07917e-08	3.58634e-06
GSE3691_CONVENTIONAL_VS_PLASMACYTOID_DC_SPLEEN_UP	Prg4:Ctsw:Pou2af1:S1pr1:Tcf7:Bcl2l11	down	6	1	4.90752e-08	3.58634e-06
GSE8921_UNSTIM_VS_TLR1_2_STIM_MONOCYTE_6H_UP	Ephx1:Tmem158:Itm2a:S1pr1:Lmo4:Dapl1	down	6	1	5.07917e-08	3.58634e-06
GSE5142_HTERT_TRANSDUCED_VS_CTRL_CD8_TCELL_LATE_PASSAGE_CLONE_DN	Lef1:Tubb2a:Prg4:Ugcg:Tcf7:Cpm	down	6	1	5.07917e-08	3.58634e-06
GSE5679_RARA_AGONIST_AM580_VS_AM580_AND_ROSIGLITAZONE_TREATED_DC_UP	Lmo4:Bcl6:Pou2af1:Nsg2:Tubb2a:Tubb2b	down	6	1	4.90752e-08	3.58634e-06
GSE7219_WT_VS_NIK_NFKB2_KO_DC_DN	Nsg2:Cd27:S1pr1:Dgka:Tcf7:Sell	down	6	1	2.97258e-08	3.58634e-06
GSE13522_CTRL_VS_T_CRUZI_Y_STRAIN_INF_SKIN_IFNAR_KO_UP	Dgka:Pou2af1:Dapl1:Tcf7:Lef1:Lmo4	down	6	1	5.07917e-08	3.58634e-06
GSE14415_ACT_TCONV_VS_ACT_NATURAL_TREG_UP	Nsg2:Lef1:Dapl1:Sell:Sesn1:Ephx1	down	6	1	3.08497e-08	3.58634e-06
GSE14415_FOXP3_KO_NATURAL_TREG_VS_TCONV_UP	Sesn1:Tcf7:Nsg2:Lef1:Sell:Ephx1	down	6	1	2.97258e-08	3.58634e-06
GSE14415_INDUCED_TREG_VS_FOXP3_KO_INDUCED_TREG_UP	Sesn1:Nsg2:Tcf7:Sell:Lef1:Dapl1	down	6	1	3.57128e-08	3.58634e-06
GSE13547_CTRL_VS_ANTI_IGM_STIM_ZFX_KO_BCELL_12H_DN	Dapl1:Nsg2:Lef1:Tcf7:Sell:Ephx1	down	6	1	2.86367e-08	3.58634e-06
GSE15330_LYMPHOID_MULTIPOTENT_VS_MEGAKARYOCYTE_ERYTHROID_PROGENITOR_IKAROS_KO_UP	Sesn1:Sell:Dapl1:Nsg2:Lef1:Tcf7	down	6	1	2.75817e-08	3.58634e-06
GSE15735_2H_VS_12H_HDAC_INHIBITOR_TREATED_CD4_TCELL_UP	Prg4:St8sia6:Sytl2:Stmn1:Tubb2b:Itm2a	down	6	1	4.90752e-08	3.58634e-06
GSE29164_CD8_TCELL_VS_CD8_TCELL_AND_IL12_TREATED_MELANOMA_DAY3_DN	Dgka:Itm2a:Sell:S1pr1:Nsg2:Tubb2a	down	6	1	5.07917e-08	3.58634e-06
GSE32164_RESTING_DIFFERENTIATED_VS_ALTERNATIVELY_ACT_M2_MACROPHAGE_UP	Tcf7:Itm2a:S1pr1:Nsg2:Sell:Stmn1	down	6	1	5.07917e-08	3.58634e-06
GSE37301_MULTIPOTENT_PROGENITOR_VS_COMMON_LYMPHOID_PROGENITOR_UP	Lef1:Ctsw:S1pr1:Dapl1:Ephx1:Cd27	down	6	1	3.32059e-08	3.58634e-06
GSE37301_MULTIPOTENT_PROGENITOR_VS_CD4_TCELL_UP	Dgka:Dapl1:Dck:Nsg2:Bcl2l11:Lef1	down	6	1	3.08497e-08	3.58634e-06
GSE37532_WT_VS_PPARG_KO_LN_TCONV_UP	Itm2a:Sesn1:Ctsw:Bcl2l11:Gpr171:St8sia6	down	6	1	5.07917e-08	3.58634e-06
GSE37532_TREG_VS_TCONV_PPARG_KO_CD4_TCELL_FROM_VISCERAL_ADIPOSE_TISSUE_UP	Pou2af1:Sytl2:Lmo4:Tubb2a:Cd27:Tcf7	down	6	1	5.07917e-08	3.58634e-06
GSE20727_H2O2_VS_ROS_INHIBITOR_TREATED_DC_DN	Dapl1:Itm2a:Ephx1:S1pr1:Tcf7:Sell	down	6	1	4.90752e-08	3.58634e-06
GSE39916_B_CELL_SPLEEN_VS_PLASMA_CELL_BONE_MARROW_UP	Dapl1:Sell:Itm2a:Stmn1:Tubb2a:Lef1	down	6	1	5.07917e-08	3.58634e-06
GSE11961_MARGINAL_ZONE_BCELL_VS_MEMORY_BCELL_DAY40_DN	Ugcg:Gpr171:Cd27:Dgka:Gpr174:Ctsw	down	6	1	5.07917e-08	3.58634e-06
GSE10211_UV_INACT_SENDAI_VS_LIVE_SENDAI_VIRUS_TRACHEAL_EPITHELIAL_CELLS_UP	Ikzf1:Ugcg:Gpr171:S1pr1:Lef1	down	5	1	5.14436e-07	3.58047e-05
GSE8685_IL15_ACT_IL2_STARVED_VS_IL21_ACT_IL2_STARVED_CD4_TCELL_DN	Ugcg:St8sia6:Tcf7:Ikzf1:Gpr171	down	5	1	6.50059e-07	4.39873e-05
GSE13547_WT_VS_ZFX_KO_BCELL_ANTI_IGM_STIM_2H_DN	Neurl3:Tcf7:Itm2a:S1pr1:Nsg2	down	5	1	6.50059e-07	4.39873e-05
GSE3720_UNSTIM_VS_LPS_STIM_VD2_GAMMADELTA_TCELL_UP	Nsg2:Tcf7:Dapl1:Dgka:Cd27	down	5	1	6.93776e-07	4.63024e-05
GSE3720_UNSTIM_VS_PMA_STIM_VD2_GAMMADELTA_TCELL_UP	Nsg2:Sell:Lef1:Cd27:Dgka	down	5	1	7.63851e-07	5.02903e-05
KAECH_NAIVE_VS_MEMORY_CD8_TCELL_UP	Sesn1:Ephx1:Pou2af1:Ugcg:Nsg2	down	5	1	1.24278e-06	5.26504e-05
KAECH_DAY8_EFF_VS_DAY15_EFF_CD8_TCELL_DN	Tcf7:Sell:Pou2af1:Nsg2:Bcl6	down	5	1	1.24278e-06	5.26504e-05
KAECH_DAY15_EFF_VS_MEMORY_CD8_TCELL_DN	Nsg2:Sell:Tcf7:Lmo4:Sesn1	down	5	1	1.24278e-06	5.26504e-05
GSE10325_LUPUS_CD4_TCELL_VS_LUPUS_BCELL_UP	Itm2a:Tcf7:Dgka:Lef1:Gpr171	down	5	1	1.1721e-06	5.26504e-05
GSE14350_IL2RB_KO_VS_WT_TREG_DN	Ephx1:Prg4:Sesn1:Tubb2b:Ctsw	down	5	1	1.24278e-06	5.26504e-05
GSE15930_STIM_VS_STIM_AND_IL12_48H_CD8_T_CELL_UP	Itm2a:Ephx1:Dgka:Tcf7:Bcl2l11	down	5	1	1.24278e-06	5.26504e-05
GSE15930_STIM_VS_STIM_AND_IFNAB_48H_CD8_T_CELL_UP	Itm2a:Ephx1:Dgka:Stmn1:Tcf7	down	5	1	1.24278e-06	5.26504e-05
GSE20366_TREG_VS_NAIVE_CD4_TCELL_HOMEOSTATIC_CONVERSION_DN	Pou2af1:Tcf7:Bcl6:Ikzf1:Nsg2	down	5	1	1.24278e-06	5.26504e-05
GSE20366_TREG_VS_NAIVE_CD4_TCELL_UP	Sesn1:Tmem158:Prg4:Sell:Ephx1	down	5	1	1.24278e-06	5.26504e-05
GSE22886_NAIVE_TCELL_VS_MONOCYTE_UP	Sesn1:Lef1:Dgka:Cd27:S1pr1	down	5	1	1.1721e-06	5.26504e-05
GSE22886_NAIVE_CD8_TCELL_VS_MONOCYTE_UP	Gpr171:Itm2a:S1pr1:Cd27:Lef1	down	5	1	1.20702e-06	5.26504e-05
GSE30083_SP1_VS_SP3_THYMOCYTE_DN	S1pr1:St8sia6:Ctsw:Dgka:Acsbg1	down	5	1	1.24278e-06	5.26504e-05
GSE7460_CD8_TCELL_VS_TREG_ACT_UP	Ikzf1:Tcf7:Ctsw:B4galnt1:Bcl2l11	down	5	1	1.24278e-06	5.26504e-05
GSE7460_CTRL_VS_TGFB_TREATED_ACT_TCONV_UP	Evi2b:Tubb2a:Dapl1:Pou2af1:Sytl2	down	5	1	1.20702e-06	5.26504e-05
GSE7460_FOXP3_MUT_VS_WT_ACT_WITH_TGFB_TCONV_DN	Sesn1:Sh3bgrl2:Sell:Lef1:S1pr1	down	5	1	1.24278e-06	5.26504e-05
GSE7852_TREG_VS_TCONV_FAT_DN	Tcf7:Ctsw:Stmn1:S1pr1:Lef1	down	5	1	1.24278e-06	5.26504e-05
GSE7852_TREG_VS_TCONV_DN	Ugcg:Ikzf1:Evi2b:Gpr171:S1pr1	down	5	1	1.20702e-06	5.26504e-05
GSE9650_EFFECTOR_VS_MEMORY_CD8_TCELL_DN	Nsg2:Sesn1:Tcf7:Sell:Lmo4	down	5	1	1.24278e-06	5.26504e-05
GSE1925_CTRL_VS_3H_IFNG_STIM_MACROPHAGE_UP	Lef1:Itm2a:Ephx1:Bcl2l11:B4galnt1	down	5	1	1.24278e-06	5.26504e-05
GSE1925_CTRL_VS_IFNG_PRIMED_MACROPHAGE_24H_IFNG_STIM_UP	Ephx1:Itm2a:Ikzf1:Bcl2l11:Sh3bgrl2	down	5	1	1.24278e-06	5.26504e-05
GSE6674_CPG_VS_CPG_AND_ANTI_IGM_STIM_BCELL_UP	Sesn1:Dapl1:Tubb2a:Nsg2:Tubb2b	down	5	1	1.24278e-06	5.26504e-05
GSE10240_IL22_VS_IL22_AND_IL17_STIM_PRIMARY_BRONCHIAL_EPITHELIAL_CELLS_UP	Ctsw:Dapl1:B4galnt1:St8sia6:Bcl6	down	5	1	1.24278e-06	5.26504e-05
GSE12003_MIR223_KO_VS_WT_BM_PROGENITOR_4D_CULTURE_UP	Sell:Itm2a:Lef1:Sytl2:Tubb2a	down	5	1	1.24278e-06	5.26504e-05
GSE13522_CTRL_VS_T_CRUZI_G_STRAIN_INF_SKIN_UP	Ctsw:Ephx1:Prg4:Tmem158:Cd27	down	5	1	1.20702e-06	5.26504e-05
GSE13522_CTRL_VS_T_CRUZI_Y_STRAIN_INF_SKIN_IFNAR_KO_DN	Acsbg1:Prg4:Ephx1:Tmem158:Sh3bgrl2	down	5	1	1.24278e-06	5.26504e-05
GSE13946_CTRL_VS_DSS_COLITIS_GD_TCELL_FROM_COLON_DN	Sesn1:Ephx1:Sell:Lef1:Dapl1	down	5	1	8.6621e-07	5.26504e-05
GSE15330_HSC_VS_MEGAKARYOCYTE_ERYTHROID_PROGENITOR_DN	Sesn1:Sell:Nsg2:Dapl1:Dgka	down	5	1	8.6621e-07	5.26504e-05
GSE17186_MEMORY_VS_CD21HIGH_TRANSITIONAL_BCELL_DN	Sesn1:Itm2a:Tcf7:Bcl2l11:B4galnt1	down	5	1	1.24278e-06	5.26504e-05
GSE28726_ACT_CD4_TCELL_VS_ACT_VA24NEG_NKTCELL_DN	Bcl2l11:Lef1:Tcf7:Tubb2a:S1pr1	down	5	1	1.24278e-06	5.26504e-05
GSE24574_BCL6_HIGH_TFH_VS_TCONV_CD4_TCELL_DN	S1pr1:Evi2b:Bcl6:Bcl2l11:Sell	down	5	1	1.1721e-06	5.26504e-05
GSE28783_ANTI_MIR33_VS_UNTREATED_ATHEROSCLEROSIS_MACROPHAGE_DN	S1pr1:Evi2b:Bcl2l11:Sell:Cpm	down	5	1	1.20702e-06	5.26504e-05
GSE33425_CD8_ALPHAALPHA_VS_ALPHABETA_CD161_HIGH_TCELL_DN	Tcf7:Cd27:Bcl2l11:Stmn1:Nsg2	down	5	1	1.24278e-06	5.26504e-05
GSE36888_STAT5_AB_KNOCKIN_VS_WT_TCELL_IL2_TREATED_17H_UP	Tcf7:S1pr1:Sell:Cd27:Nsg2	down	5	1	1.20702e-06	5.26504e-05
GSE37301_HEMATOPOIETIC_STEM_CELL_VS_RAG2_KO_NK_CELL_UP	Itm2a:Dapl1:Dgka:Lef1:Bcl2l11	down	5	1	8.39625e-07	5.26504e-05
GSE32901_TH1_VS_TH17_ENRICHED_CD4_TCELL_UP	Lef1:S1pr1:Sell:Dgka:Tcf7	down	5	1	9.21452e-07	5.26504e-05
GSE40274_XBP1_VS_FOXP3_AND_XBP1_TRANSDUCED_ACTIVATED_CD4_TCELL_UP	Cpm:St8sia6:Ephx1:Sesn1:Sell	down	5	1	1.24278e-06	5.26504e-05
GSE40666_WT_VS_STAT1_KO_CD8_TCELL_UP	Bcl6:S1pr1:Sytl2:Gpr174:Tubb2a	down	5	1	1.24278e-06	5.26504e-05
GSE38304_MYC_NEG_VS_POS_GC_BCELL_UP	Stmn1:Tubb2b:Itm2a:Dapl1:Ephx1	down	5	1	1.24278e-06	5.26504e-05
GSE36078_WT_VS_IL1R_KO_LUNG_DC_AFTER_AD5_INF_DN	Tcf7:Ephx1:Dapl1:St8sia6:Pou2af1	down	5	1	1.20702e-06	5.26504e-05
GSE43863_DAY6_EFF_VS_DAY150_MEM_LY6C_INT_CXCR5POS_CD4_TCELL_DN	Pou2af1:Sell:Ctsw:Dgka:Dck	down	5	1	1.24278e-06	5.26504e-05
GSE43863_TH1_VS_TFH_MEMORY_CD4_TCELL_DN	Evi2b:Gpr34:Tubb2a:Pou2af1:Ctsw	down	5	1	1.24278e-06	5.26504e-05
GSE19941_LPS_VS_LPS_AND_IL10_STIM_IL10_KO_MACROPHAGE_DN	Dapl1:Gpr174:Neurl3:Sell	down	4	1	1.11639e-05	0.000468885
GSE3565_DUSP1_VS_WT_SPLENOCYTES_POST_LPS_INJECTION_UP	Sell:Nsg2:Dapl1:Neurl3	down	4	1	1.21572e-05	0.000506236
KAECH_DAY8_EFF_VS_MEMORY_CD8_TCELL_DN	Nsg2:Tcf7:Sell:Sesn1	down	4	1	2.45522e-05	0.000519196
GOLDRATH_NAIVE_VS_MEMORY_CD8_TCELL_UP	Ephx1:Dgka:Lef1:Sesn1	down	4	1	2.51499e-05	0.000519196
GSE10325_CD4_TCELL_VS_LUPUS_CD4_TCELL_UP	Sesn1:Sytl2:Ctsw:Evi2b	down	4	1	2.339e-05	0.000519196
GSE11057_EFF_MEM_VS_CENT_MEM_CD4_TCELL_DN	Sell:Tcf7:Cd27:Lef1	down	4	1	1.86795e-05	0.000519196
GSE12366_NAIVE_VS_MEMORY_BCELL_DN	Pou2af1:Gpr34:Lmo4:Cd27	down	4	1	2.11944e-05	0.000519196
GSE14350_IL2RB_KO_VS_WT_TEFF_UP	Pou2af1:Dapl1:Gpr174:St8sia6	down	4	1	2.51499e-05	0.000519196
GSE1460_DP_VS_CD4_THYMOCYTE_DN	Itm2a:Sell:S1pr1:Gpr171	down	4	1	2.51499e-05	0.000519196
GSE16522_ANTI_CD3CD28_STIM_VS_UNSTIM_NAIVE_CD8_TCELL_DN	Bcl2l11:Dck:Ctsw:Gpr171	down	4	1	2.51499e-05	0.000519196
GSE17721_POLYIC_VS_CPG_8H_BMDC_UP	Dgka:Bcl6:Ephx1:Evi2b	down	4	1	2.51499e-05	0.000519196
GSE17974_IL4_AND_ANTI_IL12_VS_UNTREATED_72H_ACT_CD4_TCELL_DN	Gpr174:Itm2a:Sell:Lmo4	down	4	1	2.28253e-05	0.000519196
GSE22886_NAIVE_TCELL_VS_NKCELL_UP	Lef1:Dgka:Cd27:Itm2a	down	4	1	2.39656e-05	0.000519196
GSE22886_NAIVE_CD8_TCELL_VS_NKCELL_UP	Dgka:Lef1:Cd27:Ephx1	down	4	1	2.39656e-05	0.000519196
GSE22886_TCELL_VS_BCELL_NAIVE_UP	Itm2a:Lef1:Cd27:Dgka	down	4	1	2.45522e-05	0.000519196
GSE22886_CD8_TCELL_VS_BCELL_NAIVE_UP	Itm2a:Gpr171:Lef1:Cd27	down	4	1	2.39656e-05	0.000519196
GSE22886_NAIVE_TCELL_VS_DC_UP	Tcf7:Sell:Dgka:Lef1	down	4	1	2.45522e-05	0.000519196
GSE22886_NAIVE_CD8_TCELL_VS_DC_UP	Itm2a:Ikzf1:Gpr171:Tcf7	down	4	1	2.45522e-05	0.000519196
GSE22886_NAIVE_CD4_TCELL_VS_DC_UP	Tcf7:Ikzf1:Cd27:Lef1	down	4	1	2.339e-05	0.000519196
GSE24142_EARLY_THYMIC_PROGENITOR_VS_DN2_THYMOCYTE_ADULT_DN	Tubb2b:Sytl2:Dgka:Lef1	down	4	1	2.51499e-05	0.000519196
GSE24142_EARLY_THYMIC_PROGENITOR_VS_DN2_THYMOCYTE_FETAL_DN	Pou2af1:Tubb2b:Sell:Tubb2a	down	4	1	2.51499e-05	0.000519196
GSE24142_EARLY_THYMIC_PROGENITOR_VS_DN3_THYMOCYTE_FETAL_DN	Lef1:Sh3bgrl2:Tubb2a:Tubb2b	down	4	1	2.51499e-05	0.000519196
GSE24142_ADULT_VS_FETAL_DN2_THYMOCYTE_UP	Sytl2:Sell:Bcl6:Ctsw	down	4	1	2.51499e-05	0.000519196
GSE24634_NAIVE_CD4_TCELL_VS_DAY3_IL4_CONV_TREG_UP	S1pr1:Itm2a:Lef1:Tcf7	down	4	1	2.39656e-05	0.000519196
GSE24634_TEFF_VS_TCONV_DAY10_IN_CULTURE_UP	Gpr171:Pou2af1:Stmn1:Itm2a	down	4	1	2.51499e-05	0.000519196
GSE26669_CTRL_VS_COSTIM_BLOCK_MLR_CD8_TCELL_DN	Evi2b:Ephx1:Cpm:Ikzf1	down	4	1	2.51499e-05	0.000519196
GSE29618_MONOCYTE_VS_PDC_DN	Stmn1:Ugcg:Gpr171:Dck	down	4	1	2.28253e-05	0.000519196
GSE29618_PDC_VS_MDC_UP	Ugcg:Stmn1:Dck:Gpr171	down	4	1	2.339e-05	0.000519196
GSE29618_BCELL_VS_PDC_DAY7_FLU_VACCINE_DN	Dck:Stmn1:Ugcg:Gpr171	down	4	1	2.39656e-05	0.000519196
GSE30962_PRIMARY_VS_SECONDARY_CHRONIC_LCMV_INF_CD8_TCELL_UP	Tcf7:Nsg2:Stmn1:Bcl6	down	4	1	2.45522e-05	0.000519196
GSE32423_MEMORY_VS_NAIVE_CD8_TCELL_DN	Sesn1:Itm2a:Tubb2b:Ephx1	down	4	1	2.51499e-05	0.000519196
GSE32423_CTRL_VS_IL7_IL4_MEMORY_CD8_TCELL_UP	Gpr171:Gpr174:Ugcg:Cpm	down	4	1	2.51499e-05	0.000519196
GSE39820_CTRL_VS_IL1B_IL6_CD4_TCELL_UP	Dapl1:Gpr34:Lef1:St8sia6	down	4	1	2.45522e-05	0.000519196
GSE39820_CTRL_VS_IL1B_IL6_IL23A_CD4_TCELL_UP	Gpr34:St8sia6:Dapl1:Sytl2	down	4	1	2.51499e-05	0.000519196
GSE39820_CTRL_VS_TGFBETA1_IL6_CD4_TCELL_UP	Sell:Gpr174:St8sia6:Gpr34	down	4	1	2.51499e-05	0.000519196
GSE7460_TCONV_VS_TREG_LN_UP	Ikzf1:Dapl1:Lmo4:S1pr1	down	4	1	2.51499e-05	0.000519196
GSE7460_WT_VS_FOXP3_HET_ACT_TCONV_UP	Dapl1:Lef1:Bcl2l11:Ephx1	down	4	1	2.51499e-05	0.000519196
GSE7460_WT_VS_FOXP3_HET_ACT_WITH_TGFB_TCONV_UP	Sytl2:Lef1:S1pr1:Dapl1	down	4	1	2.51499e-05	0.000519196
GSE7852_TREG_VS_TCONV_LN_DN	Tcf7:Dapl1:S1pr1:Ikzf1	down	4	1	2.51499e-05	0.000519196
GSE7852_THYMUS_VS_FAT_TREG_UP	Lef1:Dck:Tcf7:St8sia6	down	4	1	2.51499e-05	0.000519196
GSE8678_IL7R_LOW_VS_HIGH_EFF_CD8_TCELL_DN	Dgka:Lef1:Bcl2l11:Sesn1	down	4	1	2.45522e-05	0.000519196
GSE9650_NAIVE_VS_EXHAUSTED_CD8_TCELL_UP	Dgka:Sell:Sesn1:Nsg2	down	4	1	2.51499e-05	0.000519196
GSE9650_EXHAUSTED_VS_MEMORY_CD8_TCELL_DN	Nsg2:Dgka:Sell:Lef1	down	4	1	2.51499e-05	0.000519196
GSE369_SOCS3_KO_VS_WT_LIVER_DN	Lmo4:S1pr1:Dck:Lef1	down	4	1	2.45522e-05	0.000519196
GSE369_PRE_VS_POST_IL6_INJECTION_IFNG_KO_LIVER_DN	Itm2a:Gpr34:Pou2af1:Gpr171	down	4	1	2.51499e-05	0.000519196
GSE369_PRE_VS_POST_IL6_INJECTION_IFNG_WT_LIVER_DN	Cpm:Dgka:Bcl6:B4galnt1	down	4	1	2.51499e-05	0.000519196
GSE369_SOCS3_KO_VS_IFNG_KO_LIVER_DN	Stmn1:Gpr34:Evi2b:Nsg2	down	4	1	2.51499e-05	0.000519196
GSE557_CIITA_KO_VS_I_AB_KO_DC_UP	Evi2b:St8sia6:Bcl2l11:B4galnt1	down	4	1	2.51499e-05	0.000519196
GSE2770_IL12_VS_TGFB_AND_IL12_TREATED_ACT_CD4_TCELL_48H_UP	Bcl2l11:Lmo4:Gpr171:Dgka	down	4	1	2.51499e-05	0.000519196
GSE2770_TGFB_AND_IL4_VS_IL12_TREATED_ACT_CD4_TCELL_6H_UP	Ctsw:Tubb2b:Gpr171:Ikzf1	down	4	1	2.51499e-05	0.000519196
GSE2770_TGFB_AND_IL4_VS_TGFB_AND_IL12_TREATED_ACT_CD4_TCELL_6H_DN	Tcf7:Dgka:Dck:Itm2a	down	4	1	2.51499e-05	0.000519196
GSE2405_HEAT_KILLED_LYSATE_VS_LIVE_A_PHAGOCYTOPHILUM_STIM_NEUTROPHIL_9H_DN	Itm2a:Sell:Ephx1:Ctsw	down	4	1	2.51499e-05	0.000519196
GSE22601_IMMATURE_CD4_SINGLE_POSITIVE_VS_CD8_SINGLE_POSITIVE_THYMOCYTE_UP	Cd27:Sesn1:Evi2b:Ugcg	down	4	1	2.51499e-05	0.000519196
GSE22601_DOUBLE_NEGATIVE_VS_CD4_SINGLE_POSITIVE_THYMOCYTE_DN	Ctsw:Tcf7:Bcl6:Pou2af1	down	4	1	2.51499e-05	0.000519196
GSE22601_DOUBLE_NEGATIVE_VS_DOUBLE_POSITIVE_THYMOCYTE_DN	Sell:Tcf7:Dgka:Cpm	down	4	1	2.51499e-05	0.000519196
GSE22601_CD4_SINGLE_POSITIVE_VS_CD8_SINGLE_POSITIVE_THYMOCYTE_DN	Dgka:Pou2af1:Sell:Evi2b	down	4	1	2.51499e-05	0.000519196
GSE22601_DOUBLE_POSITIVE_VS_CD8_SINGLE_POSITIVE_THYMOCYTE_UP	St8sia6:Sell:Dgka:Cpm	down	4	1	2.51499e-05	0.000519196
GSE8921_3H_VS_24H_TLR1_2_STIM_MONOCYTE_UP	Ctsw:Evi2b:Prg4:Tcf7	down	4	1	2.45522e-05	0.000519196
GSE3039_CD4_TCELL_VS_ALPHAALPHA_CD8_TCELL_UP	Tubb2a:S1pr1:St8sia6:Sell	down	4	1	2.51499e-05	0.000519196
GSE5142_CTRL_VS_HTERT_TRANSDUCED_CD8_TCELL_EARLY_PASSAGE_CLONE_UP	Sytl2:Tubb2b:Acsbg1:Tubb2a	down	4	1	2.51499e-05	0.000519196
GSE5679_CTRL_VS_RARA_AGONIST_AM580_TREATED_DC_DN	Sh3bgrl2:Acsbg1:Tubb2a:Sytl2	down	4	1	2.51499e-05	0.000519196
GSE5679_PPARG_LIGAND_ROSIGLITAZONE_VS_ROSIGLITAZONE_AND_RARA_AGONIST_AM580_TREATED_DC_DN	Acsbg1:Prg4:Dgka:Cpm	down	4	1	2.51499e-05	0.000519196
GSE5455_HEALTHY_VS_TUMOR_BEARING_MOUSE_SPLEEN_MONOCYTE_UP	Pou2af1:Bcl6:Tubb2b:Lmo4	down	4	1	2.45522e-05	0.000519196
GSE6092_UNSTIM_VS_IFNG_STIM_ENDOTHELIAL_CELL_DN	Ctsw:Evi2b:Dgka:Sell	down	4	1	2.51499e-05	0.000519196
GSE6259_33D1_POS_VS_DEC205_POS_FLT3L_INDUCED_SPLENIC_DC_DN	Bcl2l11:Sesn1:Neurl3:Tubb2b	down	4	1	2.22712e-05	0.000519196
GSE7218_IGM_VS_IGG_SIGNAL_THGOUGH_ANTIGEN_BCELL_DN	Dgka:Lef1:Cd27:Gpr171	down	4	1	1.51459e-05	0.000519196
GSE7218_UNSTIM_VS_ANTIGEN_STIM_THROUGH_IGG_BCELL_DN	Gpr171:Lef1:Dgka:Gpr174	down	4	1	1.55565e-05	0.000519196
GSE4590_SMALL_VS_VPREB_POS_LARGE_PRE_BCELL_DN	Lef1:Tubb2a:Nsg2:Tubb2b	down	4	1	1.28568e-05	0.000519196
GSE4590_LARGE_PRE_BCELL_VS_VPREB_POS_LARGE_PRE_BCELL_DN	Lef1:Itm2a:Cd27:Ikzf1	down	4	1	1.91629e-05	0.000519196
GSE9509_LPS_VS_LPS_AND_IL10_STIM_IL10_KO_MACROPHAGE_30MIN_DN	Pou2af1:Dgka:Lef1:Stmn1	down	4	1	2.11944e-05	0.000519196
GSE6674_ANTI_IGM_VS_CPG_STIM_BCELL_UP	Bcl6:Sesn1:Bcl2l11:Tcf7	down	4	1	2.51499e-05	0.000519196
GSE7831_UNSTIM_VS_CPG_STIM_PDC_1H_UP	Lmo4:Tcf7:Bcl2l11:Sytl2	down	4	1	2.51499e-05	0.000519196
GSE8621_UNSTIM_VS_LPS_STIM_MACROPHAGE_DN	Cpm:Ctsw:Pou2af1:Bcl6	down	4	1	2.51499e-05	0.000519196
GSE7219_UNSTIM_VS_LPS_AND_ANTI_CD40_STIM_NIK_NFKB2_KO_DC_DN	Gpr171:Neurl3:Sytl2:Ugcg	down	4	1	2.11944e-05	0.000519196
GSE13547_CTRL_VS_ANTI_IGM_STIM_BCELL_12H_DN	Tcf7:Cpm:Lef1:Ctsw	down	4	1	1.82058e-05	0.000519196
GSE15330_HSC_VS_GRANULOCYTE_MONOCYTE_PROGENITOR_IKAROS_KO_DN	Tcf7:Nsg2:Ephx1:Sytl2	down	4	1	2.51499e-05	0.000519196
GSE15330_HSC_VS_PRO_BCELL_UP	Tmem158:Tcf7:Nsg2:Lef1	down	4	1	2.51499e-05	0.000519196
GSE16697_CD4_TCELL_VS_TFH_CD4_TCELL_DN	Dgka:St8sia6:Gpr34:Itm2a	down	4	1	2.51499e-05	0.000519196
GSE17186_MEMORY_VS_NAIVE_BCELL_UP	B4galnt1:Ugcg:Cpm:Acsbg1	down	4	1	2.51499e-05	0.000519196
GSE17186_BLOOD_VS_CORD_BLOOD_CD21LOW_TRANSITIONAL_BCELL_UP	Ikzf1:Sesn1:B4galnt1:Prg4	down	4	1	2.51499e-05	0.000519196
GSE17186_NAIVE_VS_CD21HIGH_TRANSITIONAL_BCELL_UP	Tcf7:Lmo4:Ikzf1:Pou2af1	down	4	1	2.45522e-05	0.000519196
GSE16450_IMMATURE_VS_MATURE_NEURON_CELL_LINE_6H_IFNA_STIM_UP	Evi2b:Gpr171:Sh3bgrl2:Pou2af1	down	4	1	2.45522e-05	0.000519196
GSE21670_UNTREATED_VS_IL6_TREATED_CD4_TCELL_DN	Evi2b:Ugcg:Tcf7:Ikzf1	down	4	1	2.51499e-05	0.000519196
GSE21670_IL6_VS_TGFB_AND_IL6_TREATED_CD4_TCELL_UP	Tcf7:Lef1:Sell:Dgka	down	4	1	2.06715e-05	0.000519196
GSE21379_WT_VS_SAP_KO_CD4_TCELL_DN	Lef1:Cpm:Pou2af1:Dck	down	4	1	2.51499e-05	0.000519196
GSE21546_WT_VS_ELK1_KO_ANTI_CD3_STIM_DP_THYMOCYTES_UP	Ctsw:Bcl6:Lef1:Tubb2a	down	4	1	2.51499e-05	0.000519196
GSE16385_MONOCYTE_VS_12H_ROSIGLITAZONE_IL4_TREATED_MACROPHAGE_DN	B4galnt1:Ugcg:Lef1:Gpr171	down	4	1	2.51499e-05	0.000519196
GSE25123_CTRL_VS_IL4_AND_ROSIGLITAZONE_STIM_MACROPHAGE_UP	Lef1:B4galnt1:Gpr171:Ugcg	down	4	1	2.51499e-05	0.000519196
GSE23984_CTRL_VS_HYPOCALEMIC_VITAMIND_ANALOG_TCELL_DN	Sesn1:Evi2b:Dgka:Gpr34	down	4	1	2.51499e-05	0.000519196
GSE23502_BM_VS_COLON_TUMOR_MYELOID_DERIVED_SUPPRESSOR_CELL_DN	Sesn1:Evi2b:Sell:Gpr174	down	4	1	2.51499e-05	0.000519196
GSE19941_UNSTIM_VS_LPS_STIM_IL10_KO_NFKBP50_KO_MACROPHAGE_UP	St8sia6:Itm2a:Gpr34:Sesn1	down	4	1	2.51499e-05	0.000519196
GSE19941_UNSTIM_VS_LPS_STIM_IL10_KO_MACROPHAGE_DN	St8sia6:Gpr174:Gpr34:Sesn1	down	4	1	2.51499e-05	0.000519196
GSE25677_MPL_VS_R848_STIM_BCELL_DN	Dgka:Sell:Bcl6:Gpr174	down	4	1	2.17276e-05	0.000519196
GSE26488_CTRL_VS_PEPTIDE_INJECTION_OT2_THYMOCYTE_DN	Dgka:Bcl6:Sell:Neurl3	down	4	1	2.01587e-05	0.000519196
GSE24574_BCL6_HIGH_TFH_VS_TFH_CD4_TCELL_DN	Dgka:Ctsw:Lef1:Tcf7	down	4	1	2.51499e-05	0.000519196
GSE24574_BCL6_HIGH_TFH_VS_TFH_CD4_TCELL_UP	S1pr1:Evi2b:Bcl2l11:Sell	down	4	1	2.28253e-05	0.000519196
GSE28130_ACTIVATED_VS_INDUCEED_TREG_UP	Sell:S1pr1:Evi2b:Bcl2l11	down	4	1	2.28253e-05	0.000519196
GSE28783_ANTI_MIR33_VS_CTRL_ATHEROSCLEROSIS_MACROPHAGE_UP	Bcl2l11:Evi2b:S1pr1:Sell	down	4	1	2.45522e-05	0.000519196
GSE22501_PERIPHERAL_BLOOD_VS_CORD_BLOOD_TREG_DN	Sell:Evi2b:Bcl2l11:S1pr1	down	4	1	2.45522e-05	0.000519196
GSE29949_MICROGLIA_BRAIN_VS_MONOCYTE_BONE_MARROW_DN	Cd27:Itm2a:Pou2af1:Bcl6	down	4	1	2.51499e-05	0.000519196
GSE29164_UNTREATED_VS_CD8_TCELL_TREATED_MELANOMA_DAY7_DN	Itm2a:Ephx1:Evi2b:Tcf7	down	4	1	2.51499e-05	0.000519196
GSE32164_ALTERNATIVELY_ACT_M2_VS_CMYC_INHIBITED_MACROPHAGE_DN	Tcf7:Sell:S1pr1:Nsg2	down	4	1	2.51499e-05	0.000519196
GSE32164_RESTING_DIFFERENTIATED_VS_CMYC_INHIBITED_MACROPHAGE_DN	Cd27:Itm2a:Tcf7:B4galnt1	down	4	1	2.51499e-05	0.000519196
GSE32164_RESTING_DIFFERENTIATED_VS_CMYC_INHIBITED_MACROPHAGE_UP	Bcl6:S1pr1:Pou2af1:Sell	down	4	1	2.51499e-05	0.000519196
GSE33374_CD8_ALPHAALPHA_VS_ALPHABETA_CD161_HIGH_TCELL_DN	Cd27:B4galnt1:Bcl6:Tcf7	down	4	1	2.51499e-05	0.000519196
GSE33424_CD161_HIGH_VS_INT_CD8_TCELL_DN	Itm2a:Nsg2:Tcf7:Stmn1	down	4	1	2.51499e-05	0.000519196
GSE33424_CD161_HIGH_VS_NEG_CD8_TCELL_DN	Stmn1:Nsg2:Tcf7:Itm2a	down	4	1	2.51499e-05	0.000519196
GSE37301_COMMON_LYMPHOID_PROGENITOR_VS_RAG2_KO_NK_CELL_DN	Tcf7:Evi2b:Pou2af1:Lef1	down	4	1	2.39656e-05	0.000519196
GSE37301_CD4_TCELL_VS_GRANULOCYTE_MONOCYTE_PROGENITOR_DN	St8sia6:Ikzf1:Tcf7:Bcl2l11	down	4	1	2.11944e-05	0.000519196
GSE37301_CD4_TCELL_VS_GRANULOCYTE_MONOCYTE_PROGENITOR_UP	Lef1:Tcf7:Dapl1:Ikzf1	down	4	1	1.47438e-05	0.000519196
GSE39152_BRAIN_VS_SPLEEN_CD103_NEG_MEMORY_CD8_TCELL_UP	Tubb2a:Dck:Bcl6:Stmn1	down	4	1	2.51499e-05	0.000519196
GSE40274_XBP1_VS_FOXP3_AND_XBP1_TRANSDUCED_ACTIVATED_CD4_TCELL_DN	Ctsw:Lmo4:B4galnt1:Tcf7	down	4	1	2.39656e-05	0.000519196
GSE40274_HELIOS_VS_FOXP3_AND_HELIOS_TRANSDUCED_ACTIVATED_CD4_TCELL_UP	Sell:Gpr34:Sesn1:St8sia6	down	4	1	2.51499e-05	0.000519196
GSE40277_EOS_AND_LEF1_TRANSDUCED_VS_GATA1_AND_SATB1_TRANSDUCED_CD4_TCELL_DN	Ikzf1:Evi2b:Gpr171:Pou2af1	down	4	1	2.51499e-05	0.000519196
GSE40274_FOXP3_VS_FOXP3_AND_PBX1_TRANSDUCED_ACTIVATED_CD4_TCELL_DN	Tcf7:Tubb2b:Ctsw:B4galnt1	down	4	1	2.51499e-05	0.000519196
GSE40441_NRP1_POS_INDUCED_TREG_VS_NRP1_NEG_NATURAL_TREG_DN	Sytl2:Stmn1:Ctsw:Bcl2l11	down	4	1	2.51499e-05	0.000519196
GSE40443_INDUCED_VS_TOTAL_TREG_UP	Sytl2:Bcl2l11:Gpr174:Lmo4	down	4	1	2.51499e-05	0.000519196
GSE40666_NAIVE_VS_EFFECTOR_CD8_TCELL_UP	Cpm:Bcl6:Lef1:Tubb2a	down	4	1	2.51499e-05	0.000519196
GSE43863_DAY6_EFF_VS_DAY150_MEM_TH1_CD4_TCELL_UP	Cd27:Tubb2b:Tubb2a:Ephx1	down	4	1	2.51499e-05	0.000519196
GSE43863_DAY6_EFF_VS_DAY150_MEM_LY6C_INT_CXCR5POS_CD4_TCELL_UP	Ephx1:Cd27:Tubb2b:Dapl1	down	4	1	2.51499e-05	0.000519196
GSE43863_TH1_VS_LY6C_INT_CXCR5POS_EFFECTOR_CD4_TCELL_DN	Tubb2b:Ephx1:Prg4:Sh3bgrl2	down	4	1	2.51499e-05	0.000519196
GSE10147_IL3_VS_IL3_AND_CPG_STIM_PDC_UP	Sytl2:Tubb2b:Dgka	down	3	1	0.000197275	0.00405538
GSE10239_MEMORY_VS_DAY4.5_EFF_CD8_TCELL_DN	Tubb2a:Pou2af1:Bcl2l11	down	3	1	0.000410248	0.0043076
GSE10325_BCELL_VS_MYELOID_UP	S1pr1:Pou2af1:Cd27	down	3	1	0.000380061	0.0043076
GSE10325_LUPUS_BCELL_VS_LUPUS_MYELOID_UP	Pou2af1:S1pr1:Itm2a	down	3	1	0.000365581	0.0043076
GSE11057_CD4_CENT_MEM_VS_PBMC_UP	Tcf7:Cd27:Dgka	down	3	1	0.000380061	0.0043076
GSE13306_LAMINA_PROPRIA_VS_SPLEEN_TREG_UP	Prg4:Sesn1:Gpr174	down	3	1	0.000410248	0.0043076
GSE13411_NAIVE_BCELL_VS_PLASMA_CELL_UP	Dgka:Bcl6:Dck	down	3	1	0.000380061	0.0043076
GSE13411_NAIVE_VS_MEMORY_BCELL_DN	Lmo4:Pou2af1:Cd27	down	3	1	0.000394948	0.0043076
GSE1432_CTRL_VS_IFNG_24H_MICROGLIA_UP	Cpm:Dgka:Sesn1	down	3	1	0.000410248	0.0043076
GSE1460_INTRATHYMIC_T_PROGENITOR_VS_DP_THYMOCYTE_DN	Dgka:Bcl6:Acsbg1	down	3	1	0.000387453	0.0043076
GSE1460_CD4_THYMOCYTE_VS_THYMIC_STROMAL_CELL_UP	Ikzf1:Acsbg1:Dgka	down	3	1	0.000387453	0.0043076
GSE15930_NAIVE_VS_48H_IN_VITRO_STIM_IFNAB_CD8_TCELL_UP	S1pr1:Tcf7:Nsg2	down	3	1	0.000402546	0.0043076
GSE16522_ANTI_CD3CD28_STIM_VS_UNSTIM_MEMORY_CD8_TCELL_DN	Bcl2l11:Gpr34:Ugcg	down	3	1	0.000410248	0.0043076
GSE17721_LPS_VS_POLYIC_24H_BMDC_DN	Tubb2a:Evi2b:Ikzf1	down	3	1	0.000410248	0.0043076
GSE17721_CPG_VS_GARDIQUIMOD_6H_BMDC_UP	Tmem158:B4galnt1:Prg4	down	3	1	0.000402546	0.0043076
GSE17721_LPS_VS_CPG_6H_BMDC_DN	Tmem158:Evi2b:Bcl2l11	down	3	1	0.000410248	0.0043076
GSE17721_LPS_VS_GARDIQUIMOD_24H_BMDC_UP	Tubb2a:Ephx1:Dgka	down	3	1	0.000410248	0.0043076
GSE17974_IL4_AND_ANTI_IL12_VS_UNTREATED_12H_ACT_CD4_TCELL_DN	Bcl6:Sytl2:Cd27	down	3	1	0.000337814	0.0043076
GSE20366_EX_VIVO_VS_HOMEOSTATIC_CONVERSION_NAIVE_CD4_TCELL_DN	Sh3bgrl2:Stmn1:Pou2af1	down	3	1	0.000410248	0.0043076
GSE20366_CD103_POS_VS_CD103_KLRG1_DP_TREG_UP	Tubb2a:Sell:Ctsw	down	3	1	0.000410248	0.0043076
GSE20366_TREG_VS_NAIVE_CD4_TCELL_DN	Tcf7:Evi2b:Dapl1	down	3	1	0.000410248	0.0043076
GSE20715_0H_VS_24H_OZONE_LUNG_UP	Tcf7:Cd27:Sell	down	3	1	0.000410248	0.0043076
GSE20715_0H_VS_48H_OZONE_TLR4_KO_LUNG_UP	Sell:Ephx1:Dgka	down	3	1	0.000410248	0.0043076
GSE22886_NAIVE_CD4_TCELL_VS_NKCELL_UP	Dgka:Cd27:Lef1	down	3	1	0.000380061	0.0043076
GSE22886_CD4_TCELL_VS_BCELL_NAIVE_UP	Lef1:Cd27:Itm2a	down	3	1	0.000394948	0.0043076
GSE22886_IGM_MEMORY_BCELL_VS_BLOOD_PLASMA_CELL_UP	Dgka:Tcf7:Dck	down	3	1	0.000387453	0.0043076
GSE22886_IGM_MEMORY_BCELL_VS_BM_PLASMA_CELL_UP	S1pr1:Dgka:Dck	down	3	1	0.000410248	0.0043076
GSE22886_DAY0_VS_DAY1_MONOCYTE_IN_CULTURE_UP	Sell:Ikzf1:Lmo4	down	3	1	0.000410248	0.0043076
GSE22886_NAIVE_CD4_TCELL_VS_NEUTROPHIL_UP	S1pr1:Lef1:Itm2a	down	3	1	0.000410248	0.0043076
GSE24142_EARLY_THYMIC_PROGENITOR_VS_DN2_THYMOCYTE_DN	Dgka:Pou2af1:Tubb2a	down	3	1	0.000410248	0.0043076
GSE24142_EARLY_THYMIC_PROGENITOR_VS_DN3_THYMOCYTE_DN	Dgka:Lef1:Nsg2	down	3	1	0.000410248	0.0043076
GSE24142_DN2_VS_DN3_THYMOCYTE_DN	Nsg2:Dgka:Lef1	down	3	1	0.000410248	0.0043076
GSE24142_EARLY_THYMIC_PROGENITOR_VS_DN2_THYMOCYTE_ADULT_UP	Bcl6:Cd27:Evi2b	down	3	1	0.000410248	0.0043076
GSE24142_EARLY_THYMIC_PROGENITOR_VS_DN3_THYMOCYTE_ADULT_DN	Tubb2b:Lef1:Dgka	down	3	1	0.000410248	0.0043076
GSE24142_DN2_VS_DN3_THYMOCYTE_ADULT_DN	Lef1:Dgka:Nsg2	down	3	1	0.000410248	0.0043076
GSE24634_TEFF_VS_TCONV_DAY3_IN_CULTURE_DN	Tcf7:Sell:Evi2b	down	3	1	0.000402546	0.0043076
GSE24634_IL4_VS_CTRL_TREATED_NAIVE_CD4_TCELL_DAY10_UP	Itm2a:Stmn1:Cd27	down	3	1	0.000394948	0.0043076
GSE26495_PD1HIGH_VS_PD1LOW_CD8_TCELL_UP	Cd27:Tcf7:Prg4	down	3	1	0.000351501	0.0043076
GSE27786_LSK_VS_LIN_NEG_CELL_DN	Gpr174:Tubb2a:Nsg2	down	3	1	0.000410248	0.0043076
GSE27786_NEUTROPHIL_VS_MONO_MAC_UP	Dck:Dgka:Evi2b	down	3	1	0.000402546	0.0043076
GSE28237_FOLLICULAR_VS_LATE_GC_BCELL_DN	Dck:Prg4:Tcf7	down	3	1	0.000410248	0.0043076
GSE2826_WT_VS_BTK_KO_BCELL_UP	Ephx1:Bcl6:Dgka	down	3	1	0.000410248	0.0043076
GSE29617_CTRL_VS_DAY7_TIV_FLU_VACCINE_PBMC_2008_DN	Pou2af1:Cd27:Gpr171	down	3	1	0.000358491	0.0043076
GSE29618_BCELL_VS_PDC_DAY7_FLU_VACCINE_UP	Pou2af1:S1pr1:Tubb2a	down	3	1	0.000358491	0.0043076
GSE29618_BCELL_VS_MDC_DAY7_FLU_VACCINE_UP	Pou2af1:S1pr1:Itm2a	down	3	1	0.000344608	0.0043076
GSE29618_MONOCYTE_VS_PDC_DAY7_FLU_VACCINE_DN	Dck:Stmn1:Ugcg	down	3	1	0.000394948	0.0043076
GSE29618_PDC_VS_MDC_DAY7_FLU_VACCINE_UP	Ugcg:Stmn1:Dck	down	3	1	0.000394948	0.0043076
GSE29618_LAIV_VS_TIV_FLU_VACCINE_DAY7_PDC_DN	Lef1:Bcl6:Ikzf1	down	3	1	0.000410248	0.0043076
GSE30083_SP1_VS_SP4_THYMOCYTE_UP	Tubb2b:Itm2a:Sytl2	down	3	1	0.000410248	0.0043076
GSE31082_CD4_VS_CD8_SP_THYMOCYTE_DN	Pou2af1:Evi2b:Ctsw	down	3	1	0.000410248	0.0043076
GSE32423_MEMORY_VS_NAIVE_CD8_TCELL_IL7_UP	Ctsw:St8sia6:Evi2b	down	3	1	0.000410248	0.0043076
GSE32423_IL7_VS_IL7_IL4_MEMORY_CD8_TCELL_UP	Acsbg1:Evi2b:Sesn1	down	3	1	0.000410248	0.0043076
GSE339_CD8POS_VS_CD4CD8DN_DC_DN	B4galnt1:Tcf7:Sesn1	down	3	1	0.000410248	0.0043076
GSE360_CTRL_VS_L_DONOVANI_MAC_DN	Cd27:Ikzf1:S1pr1	down	3	1	0.000402546	0.0043076
GSE3982_MAC_VS_BCELL_UP	Sytl2:Bcl6:Ephx1	down	3	1	0.000410248	0.0043076
GSE3982_MAC_VS_BASOPHIL_UP	Ephx1:Cpm:Tubb2a	down	3	1	0.000410248	0.0043076
GSE3982_MAC_VS_TH1_UP	Tubb2a:Evi2b:Sesn1	down	3	1	0.000394948	0.0043076
GSE39820_TGFBETA1_IL6_VS_TGFBETA1_IL6_IL23A_TREATED_CD4_TCELL_DN	Gpr171:Nsg2:Dapl1	down	3	1	0.000402546	0.0043076
GSE5463_CTRL_VS_DEXAMETHASONE_TREATED_THYMOCYTE_UP	Ugcg:Ctsw:Cd27	down	3	1	0.000410248	0.0043076
GSE7460_TCONV_VS_TREG_LN_DN	Sh3bgrl2:Tmem158:Sesn1	down	3	1	0.000410248	0.0043076
GSE7460_TCONV_VS_TREG_THYMUS_UP	Nsg2:Evi2b:Cpm	down	3	1	0.000410248	0.0043076
GSE7852_TREG_VS_TCONV_THYMUS_DN	Nsg2:Cpm:Evi2b	down	3	1	0.000402546	0.0043076
GSE7852_TREG_VS_TCONV_FAT_UP	Sesn1:Sytl2:Cpm	down	3	1	0.000410248	0.0043076
GSE7852_LN_VS_FAT_TCONV_UP	Itm2a:Sesn1:Ephx1	down	3	1	0.000410248	0.0043076
GSE9037_CTRL_VS_LPS_1H_STIM_BMDM_UP	Ugcg:S1pr1:Lef1	down	3	1	0.000410248	0.0043076
GSE369_PRE_VS_POST_IL6_INJECTION_IFNG_KO_LIVER_UP	Evi2b:Ephx1:Cpm	down	3	1	0.000410248	0.0043076
GSE411_UNSTIM_VS_100MIN_IL6_STIM_MACROPHAGE_DN	S1pr1:Lef1:Nsg2	down	3	1	0.000410248	0.0043076
GSE411_WT_VS_SOCS3_KO_MACROPHAGE_IL6_STIM_100MIN_DN	Sell:Sesn1:Ephx1	down	3	1	0.000410248	0.0043076
GSE411_UNSTIM_VS_100MIN_IL6_STIM_SOCS3_KO_MACROPHAGE_DN	Bcl2l11:St8sia6:Tubb2a	down	3	1	0.000410248	0.0043076
GSE22601_DOUBLE_NEGATIVE_VS_CD4_SINGLE_POSITIVE_THYMOCYTE_UP	Dapl1:Nsg2:Sesn1	down	3	1	0.000410248	0.0043076
GSE22601_IMMATURE_CD4_SINGLE_POSITIVE_VS_DOUBLE_POSITIVE_THYMOCYTE_DN	Dapl1:Sytl2:Nsg2	down	3	1	0.000410248	0.0043076
GSE22601_IMMATURE_CD4_SINGLE_POSITIVE_VS_CD4_SINGLE_POSITIVE_THYMOCYTE_UP	Tmem158:Pou2af1:Ctsw	down	3	1	0.000410248	0.0043076
GSE2585_CD80_HIGH_VS_LOW_MTEC_DN	Tmem158:Bcl2l11:Cpm	down	3	1	0.000380061	0.0043076
GSE8921_UNSTIM_0H_VS_TLR1_2_STIM_MONOCYTE_6H_DN	Acsbg1:Ctsw:Prg4	down	3	1	0.000402546	0.0043076
GSE8921_UNSTIM_VS_TLR1_2_STIM_MONOCYTE_24H_UP	Evi2b:Tubb2b:Ctsw	down	3	1	0.000394948	0.0043076
GSE3039_ALPHAALPHA_CD8_TCELL_VS_B2_BCELL_UP	Dapl1:B4galnt1:Pou2af1	down	3	1	0.000410248	0.0043076
GSE3039_NKT_CELL_VS_ALPHAALPHA_CD8_TCELL_DN	Sytl2:Cd27:Ctsw	down	3	1	0.000410248	0.0043076
GSE4984_UNTREATED_VS_GALECTIN1_TREATED_DC_DN	Cd27:Pou2af1:Dgka	down	3	1	0.000351501	0.0043076
GSE5542_UNTREATED_VS_IFNA_AND_IFNG_TREATED_EPITHELIAL_CELLS_6H_UP	Dgka:Lef1:Sell	down	3	1	0.000394948	0.0043076
GSE5142_CTRL_VS_HTERT_TRANSDUCED_CD8_TCELL_EARLY_PASSAGE_CLONE_DN	Stmn1:Cpm:Dapl1	down	3	1	0.000410248	0.0043076
GSE5679_CTRL_VS_PPARG_LIGAND_ROSIGLITAZONE_TREATED_DC_DN	Acsbg1:Sh3bgrl2:Tubb2a	down	3	1	0.000410248	0.0043076
GSE5679_CTRL_VS_PPARG_LIGAND_ROSIGLITAZONE_AND_RARA_AGONIST_AM580_TREATED_DC_UP	Ikzf1:Lmo4:Dck	down	3	1	0.000410248	0.0043076
GSE5679_PPARG_LIGAND_ROSIGLITAZONE_VS_RARA_AGONIST_AM580_TREATED_DC_DN	Dgka:S1pr1:Evi2b	down	3	1	0.000410248	0.0043076
GSE5455_EX_VIVO_VS_POST_24H_INCUBATION_MONOCYTES_FROM_TUMOR_BEARING_MOUSE_DN	Dgka:Evi2b:S1pr1	down	3	1	0.000410248	0.0043076
GSE5589_IL6_KO_VS_IL10_KO_LPS_AND_IL10_STIM_MACROPHAGE_180MIN_UP	S1pr1:Tubb2b:Gpr34	down	3	1	0.000410248	0.0043076
GSE3920_IFNA_VS_IFNG_TREATED_FIBROBLAST_DN	Tcf7:Acsbg1:Nsg2	down	3	1	0.000380061	0.0043076
GSE3920_IFNA_VS_IFNB_TREATED_ENDOTHELIAL_CELL_UP	Acsbg1:Cpm:Sh3bgrl2	down	3	1	0.000275051	0.0043076
GSE3920_IFNA_VS_IFNB_TREATED_ENDOTHELIAL_CELL_DN	Itm2a:Sytl2:Gpr174	down	3	1	0.000299047	0.0043076
GSE3203_INFLUENZA_INF_VS_IFNB_TREATED_LN_BCELL_UP	St8sia6:Dapl1:Ephx1	down	3	1	0.000410248	0.0043076
GSE7509_UNSTIM_VS_FCGRIIB_STIM_DC_DN	Ikzf1:Ctsw:Lmo4	down	3	1	0.000344608	0.0043076
GSE9601_UNTREATED_VS_PI3K_INHIBITOR_TREATED_HCMV_INF_MONOCYTE_DN	Tcf7:Cpm:Lef1	down	3	1	0.000216217	0.0043076
GSE9509_10MIN_VS_30MIN_LPS_STIM_IL10_KO_MACROPHAGE_DN	Pou2af1:Cd27:Lef1	down	3	1	0.000358491	0.0043076
GSE10240_CTRL_VS_IL17_AND_IL22_STIM_PRIMARY_BRONCHIAL_EPITHELIAL_CELLS_UP	Lef1:Tubb2b:Cpm	down	3	1	0.000410248	0.0043076
GSE7568_IL4_VS_IL4_AND_TGFB_TREATED_MACROPHAGE_24H_UP	Lef1:Gpr174:Ephx1	down	3	1	0.000318006	0.0043076
GSE7219_UNSTIM_VS_LPS_AND_ANTI_CD40_STIM_DC_DN	Sytl2:Gpr34:Gpr171	down	3	1	0.000311593	0.0043076
GSE13522_WT_VS_IFNAR_KO_SKING_T_CRUZI_Y_STRAIN_INF_UP	Bcl2l11:Tmem158:Prg4	down	3	1	0.000410248	0.0043076
GSE14415_ACT_VS_CTRL_NATURAL_TREG_DN	Tcf7:Ephx1:Neurl3	down	3	1	0.000324513	0.0043076
GSE14386_UNTREATED_VS_IFNA_TREATED_ACT_PBMC_MS_PATIENT_DN	Itm2a:Bcl2l11:Neurl3	down	3	1	0.000241698	0.0043076
GSE15330_HSC_VS_MEGAKARYOCYTE_ERYTHROID_PROGENITOR_IKAROS_KO_DN	Itm2a:Tubb2a:Sesn1	down	3	1	0.000402546	0.0043076
GSE15330_HSC_VS_MEGAKARYOCYTE_ERYTHROID_PROGENITOR_IKAROS_KO_UP	Dgka:Tmem158:Acsbg1	down	3	1	0.000410248	0.0043076
GSE15330_WT_VS_IKAROS_KO_GRANULOCYTE_MONOCYTE_PROGENITOR_DN	Acsbg1:Stmn1:Ctsw	down	3	1	0.000410248	0.0043076
GSE15330_HSC_VS_PRO_BCELL_DN	Nsg2:Lef1:Ctsw	down	3	1	0.000410248	0.0043076
GSE12198_LOW_IL2_STIM_NK_CELL_VS_HIGH_IL2_STIM_NK_CELL_UP	Tcf7:Itm2a:Ephx1	down	3	1	0.000410248	0.0043076
GSE9960_GRAM_NEG_VS_GRAM_NEG_AND_POS_SEPSIS_PBMC_UP	Neurl3:Tcf7:Dgka	down	3	1	0.000311593	0.0043076
GSE12392_WT_VS_IFNAR_KO_CD8A_NEG_SPLEEN_DC_UP	Sesn1:Dgka:Ikzf1	down	3	1	0.000410248	0.0043076
GSE15735_CTRL_VS_HDAC_INHIBITOR_TREATED_CD4_TCELL_12H_DN	Dgka:Acsbg1:Sytl2	down	3	1	0.000410248	0.0043076
GSE17186_NAIVE_VS_CD21LOW_TRANSITIONAL_BCELL_CORD_BLOOD_UP	Ikzf1:Itm2a:Sell	down	3	1	0.000410248	0.0043076
GSE18203_CTRL_VS_INTRATUMORAL_CPG_INJ_MC38_TUMOR_UP	Sell:Sesn1:Itm2a	down	3	1	0.000410248	0.0043076
GSE18203_CTRL_VS_INTRATUMORAL_CPG_INJ_MC38_TUMOR_DN	Pou2af1:Bcl6:Stmn1	down	3	1	0.000410248	0.0043076
GSE19888_ADENOSINE_A3R_INH_PRETREAT_AND_ACT_BY_A3R_VS_TCELL_MEMBRANES_ACT_MAST_CELL_UP	Dck:Sell:Ikzf1	down	3	1	0.000410248	0.0043076
GSE19888_CTRL_VS_TCELL_MEMBRANES_ACT_MAST_CELL_PRETREAT_A3R_INH_DN	Evi2b:Dck:Ikzf1	down	3	1	0.000410248	0.0043076
GSE20198_IL12_VS_IL12_IL18_TREATED_ACT_CD4_TCELL_DN	St8sia6:Lmo4:Dgka	down	3	1	0.000410248	0.0043076
GSE16451_CTRL_VS_WEST_EQUINE_ENC_VIRUS_MATURE_NEURON_CELL_LINE_DN	Acsbg1:Prg4:Ephx1	down	3	1	0.000410248	0.0043076
GSE16450_IMMATURE_VS_MATURE_NEURON_CELL_LINE_12H_IFNA_STIM_UP	Sytl2:Sh3bgrl2:Evi2b	down	3	1	0.000410248	0.0043076
GSE21670_UNTREATED_VS_TGFB_IL6_TREATED_STAT3_KO_CD4_TCELL_DN	Ikzf1:Lmo4:S1pr1	down	3	1	0.000410248	0.0043076
GSE21670_IL6_VS_TGFB_AND_IL6_TREATED_STAT3_KO_CD4_TCELL_UP	Cpm:Pou2af1:Sytl2	down	3	1	0.000410248	0.0043076
GSE21380_NON_TFH_VS_TFH_CD4_TCELL_DN	Ikzf1:Evi2b:Stmn1	down	3	1	0.000410248	0.0043076
GSE21546_WT_VS_SAP1A_KO_AND_ELK1_KO_ANTI_CD3_STIM_DP_THYMOCYTES_DN	Dck:Lef1:Cpm	down	3	1	0.000394948	0.0043076
GSE22140_GERMFREE_VS_SPF_ARTHRITIC_MOUSE_CD4_TCELL_UP	S1pr1:Ikzf1:Ephx1	down	3	1	0.000410248	0.0043076
GSE22140_GERMFREE_VS_SPF_MOUSE_CD4_TCELL_UP	Lef1:Lmo4:Bcl2l11	down	3	1	0.000402546	0.0043076
GSE19401_UNSTIM_VS_RETINOIC_ACID_AND_PAM2CSK4_STIM_FOLLICULAR_DC_DN	Ikzf1:Cpm:Stmn1	down	3	1	0.000402546	0.0043076
GSE21033_CTRL_VS_POLYIC_STIM_DC_12H_UP	Sesn1:Sell:Cpm	down	3	1	0.000252472	0.0043076
GSE21033_3H_VS_12H_POLYIC_STIM_DC_UP	Nsg2:Gpr34:Ugcg	down	3	1	0.000257986	0.0043076
GSE23505_UNTREATED_VS_4DAY_IL6_IL1_IL23_TREATED_CD4_TCELL_DN	S1pr1:Bcl6:Sesn1	down	3	1	0.000410248	0.0043076
GSE23925_LIGHT_ZONE_VS_DARK_ZONE_BCELL_DN	Evi2b:Cpm:Sytl2	down	3	1	0.000410248	0.0043076
GSE23925_DARK_ZONE_VS_NAIVE_BCELL_DN	Gpr171:Bcl2l11:Lmo4	down	3	1	0.000410248	0.0043076
GSE23925_LIGHT_ZONE_VS_NAIVE_BCELL_UP	Gpr171:Evi2b:Bcl2l11	down	3	1	0.000402546	0.0043076
GSE16385_ROSIGLITAZONE_VS_UNTREATED_IFNG_TNF_STIM_MACROPHAGE_UP	Sh3bgrl2:Cpm:Pou2af1	down	3	1	0.000410248	0.0043076
GSE25123_CTRL_VS_IL4_AND_ROSIGLITAZONE_STIM_PPARG_KO_MACROPHAGE_DN	Sell:St8sia6:Lmo4	down	3	1	0.000410248	0.0043076
GSE25123_WT_VS_PPARG_KO_MACROPHAGE_ROSIGLITAZONE_STIM_UP	Gpr34:Sesn1:Ephx1	down	3	1	0.000402546	0.0043076
GSE25088_ROSIGLITAZONE_VS_IL4_AND_ROSIGLITAZONE_STIM_MACROPHAGE_DAY10_DN	Ikzf1:Evi2b:Sell	down	3	1	0.000402546	0.0043076
GSE25088_WT_VS_STAT6_KO_MACROPHAGE_IL4_STIM_UP	Dgka:Tcf7:Bcl6	down	3	1	0.000402546	0.0043076
GSE17301_CTRL_VS_48H_IFNA2_STIM_CD8_TCELL_DN	Acsbg1:Bcl6:Itm2a	down	3	1	0.000372771	0.0043076
GSE17301_CTRL_VS_48H_ACD3_ACD28_IFNA5_STIM_CD8_TCELL_DN	S1pr1:Bcl2l11:Stmn1	down	3	1	0.000410248	0.0043076
GSE24292_WT_VS_PPARG_KO_MACROPHAGE_DN	Bcl2l11:Evi2b:Gpr34	down	3	1	0.000410248	0.0043076
GSE24726_WT_VS_E2_2_KO_PDC_DAY6_POST_DELETION_DN	Evi2b:Ikzf1:Gpr34	down	3	1	0.000410248	0.0043076
GSE19941_IL10_KO_VS_IL10_KO_AND_NFKBP50_KO_LPS_STIM_MACROPHAGE_DN	Nsg2:Lef1:Dck	down	3	1	0.000410248	0.0043076
GSE19941_UNSTIM_VS_LPS_AND_IL10_STIM_IL10_KO_NFKBP50_KO_MACROPHAGE_UP	Nsg2:Cd27:S1pr1	down	3	1	0.000275051	0.0043076
GSE22611_NOD2_TRANSD_VS_CTRL_TRANSD_HEK293_MDP_STIM_2H_UP	Gpr171:Ctsw:Ephx1	down	3	1	0.000365581	0.0043076
GSE27241_WT_CTRL_VS_DIGOXIN_TREATED_RORGT_KO_CD4_TCELL_IN_TH17_POLARIZING_CONDITIONS_UP	Lmo4:Sell:Stmn1	down	3	1	0.000331116	0.0043076
GSE27241_CTRL_VS_DIGOXIN_TREATED_CD4_TCELL_IN_TH17_POLARIZING_CONDITIONS_UP	Tcf7:Bcl2l11:Ephx1	down	3	1	0.000280915	0.0043076
GSE27896_HDAC6_KO_VS_WT_TREG_UP	Ephx1:Ikzf1:Tcf7	down	3	1	0.000337814	0.0043076
GSE21063_CTRL_VS_ANTI_IGM_STIM_BCELL_3H_DN	Tubb2a:Tubb2b:Dck	down	3	1	0.000252472	0.0043076
GSE21063_WT_VS_NFATC1_KO_3H_ANTI_IGM_STIM_BCELL_UP	Dgka:Ephx1:Bcl2l11	down	3	1	0.000402546	0.0043076
GSE28726_NAIVE_VS_ACTIVATED_VA24NEG_NKTCELL_DN	Dgka:Ctsw:Acsbg1	down	3	1	0.000387453	0.0043076
GSE28726_NAIVE_CD4_TCELL_VS_NAIVE_NKTCELL_UP	Tubb2a:Pou2af1:Evi2b	down	3	1	0.000402546	0.0043076
GSE28726_ACT_CD4_TCELL_VS_ACT_NKTCELL_DN	Bcl2l11:Dgka:S1pr1	down	3	1	0.000402546	0.0043076
GSE28726_NAIVE_VS_ACTIVATED_NKTCELL_UP	Dgka:Acsbg1:Ctsw	down	3	1	0.000402546	0.0043076
GSE28726_NAIVE_VS_ACTIVATED_NKTCELL_DN	S1pr1:Tubb2a:Bcl2l11	down	3	1	0.000410248	0.0043076
GSE28726_NAIVE_VS_ACTIVATED_CD4_TCELL_UP	Dgka:Tubb2a:Tcf7	down	3	1	0.000410248	0.0043076
GSE24574_BCL6_HIGH_VS_LOW_TFH_CD4_TCELL_UP	Dgka:Ctsw:Tubb2a	down	3	1	0.000402546	0.0043076
GSE22025_UNTREATED_VS_PROGESTERONE_TREATED_CD4_TCELL_UP	Pou2af1:Tubb2b:Cd27	down	3	1	0.000394948	0.0043076
GSE29949_CD8_NEG_DC_SPLEEN_VS_DC_BRAIN_DN	Cd27:Itm2a:Pou2af1	down	3	1	0.000410248	0.0043076
GSE29949_CD8_NEG_DC_SPLEEN_VS_MONOCYTE_BONE_MARROW_UP	Evi2b:Dck:Bcl2l11	down	3	1	0.000394948	0.0043076
GSE29949_CD8_POS_DC_SPLEEN_VS_DC_BRAIN_UP	Dck:Tubb2a:Bcl2l11	down	3	1	0.000394948	0.0043076
GSE29949_DC_BRAIN_VS_MONOCYTE_BONE_MARROW_DN	Ugcg:Cd27:Lmo4	down	3	1	0.000394948	0.0043076
GSE32533_MIR17_KO_VS_MIR17_OVEREXPRESS_ACT_CD4_TCELL_DN	Sh3bgrl2:Evi2b:Ikzf1	down	3	1	0.000410248	0.0043076
GSE29164_UNTREATED_VS_CD8_TCELL_TREATED_MELANOMA_DAY7_UP	B4galnt1:Ctsw:Lmo4	down	3	1	0.000410248	0.0043076
GSE23568_ID3_TRANSDUCED_VS_ID3_KO_CD8_TCELL_DN	Itm2a:Sell:Dgka	down	3	1	0.000410248	0.0043076
GSE23568_ID3_KO_VS_WT_CD8_TCELL_UP	Ctsw:Bcl2l11:Stmn1	down	3	1	0.000410248	0.0043076
GSE33424_CD161_HIGH_VS_NEG_CD8_TCELL_UP	Pou2af1:Sell:Bcl6	down	3	1	0.000410248	0.0043076
GSE33425_CD161_HIGH_VS_INT_CD8_TCELL_DN	Cd27:Tcf7:Nsg2	down	3	1	0.000410248	0.0043076
GSE33425_CD8_ALPHAALPHA_VS_ALPHABETA_CD161_HIGH_TCELL_UP	Sell:Pou2af1:Bcl6	down	3	1	0.000410248	0.0043076
GSE33425_CD161_HIGH_VS_INT_CD8_TCELL_UP	Tubb2a:Sell:Pou2af1	down	3	1	0.000410248	0.0043076
GSE33425_CD161_HIGH_VS_NEG_CD8_TCELL_UP	Sell:Itm2a:Bcl6	down	3	1	0.000410248	0.0043076
GSE26030_TH1_VS_TH17_RESTIMULATED_DAY15_POST_POLARIZATION_UP	Stmn1:Sell:Sesn1	down	3	1	0.000402546	0.0043076
GSE22313_HEALTHY_VS_SLE_MOUSE_CD4_TCELL_DN	Sesn1:Sell:Gpr34	down	3	1	0.000394948	0.0043076
GSE36888_STAT5_AB_KNOCKIN_VS_WT_TCELL_IL2_TREATED_2H_UP	Stmn1:Sesn1:Ephx1	down	3	1	0.000394948	0.0043076
GSE34515_CD16_NEG_MONOCYTE_VS_DC_DN	Ugcg:Evi2b:B4galnt1	down	3	1	0.000410248	0.0043076
GSE36891_UNSTIM_VS_PAM_TLR2_STIM_PERITONEAL_MACROPHAGE_UP	Lmo4:Sesn1:Tubb2a	down	3	1	0.000410248	0.0043076
GSE36891_POLYIC_TLR3_VS_PAM_TLR2_STIM_PERITONEAL_MACROPHAGE_DN	Sh3bgrl2:Gpr34:Prg4	down	3	1	0.000286868	0.0043076
GSE37605_FOXP3_FUSION_GFP_VS_IRES_GFP_TREG_NOD_DN	Ikzf1:S1pr1:St8sia6	down	3	1	0.000311593	0.0043076
GSE37605_C57BL6_VS_NOD_FOXP3_FUSION_GFP_TCONV_UP	Cd27:Sh3bgrl2:Gpr174	down	3	1	0.000311593	0.0043076
GSE37301_HEMATOPOIETIC_STEM_CELL_VS_RAG2_KO_NK_CELL_DN	Gpr34:Dck:Stmn1	down	3	1	0.000344608	0.0043076
GSE37301_PRO_BCELL_VS_CD4_TCELL_UP	Dck:Tcf7:Itm2a	down	3	1	0.000292912	0.0043076
GSE37301_PRO_BCELL_VS_CD4_TCELL_DN	Ephx1:Gpr171:Lef1	down	3	1	0.000275051	0.0043076
GSE32255_WT_UNSTIM_VS_JMJD2D_KNOCKDOWN_4H_LPS_STIM_DC_UP	Dck:Bcl2l11:Nsg2	down	3	1	0.000337814	0.0043076
GSE32255_WT_VS_JMJD2D_KNOCKDOWN_4H_LPS_STIM_DC_UP	Itm2a:Gpr171:Dapl1	down	3	1	0.000263587	0.0043076
GSE37532_TREG_VS_TCONV_PPARG_KO_CD4_TCELL_FROM_LN_UP	Lmo4:Cpm:Bcl2l11	down	3	1	0.000410248	0.0043076
GSE33162_UNTREATED_VS_4H_LPS_STIM_HDAC3_HET_MACROPHAGE_DN	Sesn1:Tcf7:Ephx1	down	3	1	0.000410248	0.0043076
GSE33162_UNTREATED_VS_4H_LPS_STIM_HDAC3_HET_MACROPHAGE_UP	Sh3bgrl2:Sell:Nsg2	down	3	1	0.000410248	0.0043076
GSE40274_CTRL_VS_FOXP3_AND_XBP1_TRANSDUCED_ACTIVATED_CD4_TCELL_DN	Bcl6:Pou2af1:Dapl1	down	3	1	0.000263587	0.0043076
GSE40273_XBP1_KO_VS_WT_TREG_UP	Sell:Itm2a:Bcl6	down	3	1	0.000410248	0.0043076
GSE40274_LEF1_VS_FOXP3_AND_LEF1_TRANSDUCED_ACTIVATED_CD4_TCELL_UP	Sytl2:Sesn1:Cpm	down	3	1	0.000410248	0.0043076
GSE40274_HELIOS_VS_FOXP3_AND_HELIOS_TRANSDUCED_ACTIVATED_CD4_TCELL_DN	Cpm:Ikzf1:Lef1	down	3	1	0.000410248	0.0043076
GSE40277_EOS_AND_LEF1_TRANSDUCED_VS_CTRL_CD4_TCELL_DN	Evi2b:Pou2af1:Stmn1	down	3	1	0.000402546	0.0043076
GSE40274_FOXP3_VS_FOXP3_AND_IRF4_TRANSDUCED_ACTIVATED_CD4_TCELL_DN	Evi2b:Pou2af1:Cpm	down	3	1	0.000410248	0.0043076
GSE40274_FOXP3_VS_FOXP3_AND_GATA1_TRANSDUCED_ACTIVATED_CD4_TCELL_DN	Tcf7:Tubb2a:Ctsw	down	3	1	0.000402546	0.0043076
GSE40274_FOXP3_VS_FOXP3_AND_PBX1_TRANSDUCED_ACTIVATED_CD4_TCELL_UP	Cpm:Sesn1:Pou2af1	down	3	1	0.000410248	0.0043076
GSE40274_FOXP3_VS_FOXP3_AND_GATA1_TRANSDUCED_ACTIVATED_CD4_TCELL_UP	Cd27:Pou2af1:Evi2b	down	3	1	0.000410248	0.0043076
GSE40274_FOXP3_VS_FOXP3_AND_IRF4_TRANSDUCED_ACTIVATED_CD4_TCELL_UP	Prg4:Acsbg1:Gpr34	down	3	1	0.000410248	0.0043076
GSE40443_INDUCED_VS_TOTAL_TREG_DN	St8sia6:Ctsw:S1pr1	down	3	1	0.000410248	0.0043076
GSE40666_NAIVE_VS_EFFECTOR_CD8_TCELL_DN	Evi2b:St8sia6:Ctsw	down	3	1	0.000410248	0.0043076
GSE40666_NAIVE_VS_EFFECTOR_CD8_TCELL_WITH_IFNA_STIM_90MIN_UP	Gpr34:Sesn1:Evi2b	down	3	1	0.000410248	0.0043076
GSE39110_UNTREATED_VS_IL2_TREATED_CD8_TCELL_DAY3_POST_IMMUNIZATION_UP	Gpr34:St8sia6:Dapl1	down	3	1	0.000410248	0.0043076
GSE39110_UNTREATED_VS_IL2_TREATED_CD8_TCELL_DAY6_POST_IMMUNIZATION_UP	Sytl2:Ctsw:Stmn1	down	3	1	0.000410248	0.0043076
GSE11961_FOLLICULAR_BCELL_VS_GERMINAL_CENTER_BCELL_DAY40_UP	Ephx1:Tcf7:Itm2a	down	3	1	0.000410248	0.0043076
GSE11961_FOLLICULAR_BCELL_VS_PLASMA_CELL_DAY7_DN	Dgka:Ikzf1:Lef1	down	3	1	0.000410248	0.0043076
GSE11961_MARGINAL_ZONE_BCELL_VS_GERMINAL_CENTER_BCELL_DAY40_UP	Ugcg:Ikzf1:Ephx1	down	3	1	0.000402546	0.0043076
GSE11961_FOLLICULAR_BCELL_VS_MEMORY_BCELL_DAY7_UP	Tubb2b:Ikzf1:Dck	down	3	1	0.000402546	0.0043076
GSE11961_MEMORY_BCELL_DAY7_VS_GERMINAL_CENTER_BCELL_DAY40_DN	Pou2af1:Dck:Ephx1	down	3	1	0.000402546	0.0043076
GSE11961_FOLLICULAR_BCELL_VS_MARGINAL_ZONE_BCELL_DN	Cpm:Tubb2b:Bcl6	down	3	1	0.000410248	0.0043076
GSE34179_THPOK_KO_VS_WT_VA14I_NKTCELL_UP	Dapl1:Acsbg1:Sesn1	down	3	1	0.000410248	0.0043076
GSE40184_HEALTHY_VS_HCV_INFECTED_DONOR_PBMC_UP	Tubb2a:S1pr1:Nsg2	down	3	1	0.000402546	0.0043076
GSE41867_LCMV_ARMSTRONG_VS_CLONE13_DAY8_EFFECTOR_CD8_TCELL_UP	Itm2a:Ugcg:Pou2af1	down	3	1	0.000410248	0.0043076
GSE41867_DAY6_VS_DAY8_LCMV_CLONE13_EFFECTOR_CD8_TCELL_DN	Lmo4:Ugcg:Tubb2b	down	3	1	0.000410248	0.0043076
GSE41867_DAY6_EFFECTOR_VS_DAY30_EXHAUSTED_CD8_TCELL_LCMV_CLONE13_DN	Gpr171:Ugcg:S1pr1	down	3	1	0.000410248	0.0043076
GSE28408_LY6G_POS_VS_NEG_DC_UP	Gpr171:Bcl6:Itm2a	down	3	1	0.000387453	0.0043076
GSE41978_WT_VS_ID2_KO_AND_BIM_KO_KLRG1_LOW_EFFECTOR_CD8_TCELL_DN	Nsg2:Stmn1:Tcf7	down	3	1	0.000410248	0.0043076
GSE41978_WT_VS_ID2_KO_AND_BIM_KO_KLRG1_LOW_EFFECTOR_CD8_TCELL_UP	Stmn1:Nsg2:Tcf7	down	3	1	0.000410248	0.0043076
GSE43956_WT_VS_SGK1_KO_TH17_DIFFERENTIATED_CD4_TCELL_UP	Tcf7:Ctsw:Pou2af1	down	3	1	0.000410248	0.0043076
GSE43955_TH0_VS_TGFB_IL6_TH17_ACT_CD4_TCELL_52H_UP	Bcl6:Lmo4:Tubb2a	down	3	1	0.000410248	0.0043076
GSE43955_TH0_VS_TGFB_IL6_TH17_ACT_CD4_TCELL_1H_DN	Bcl6:Ctsw:Nsg2	down	3	1	0.000410248	0.0043076
GSE43955_TH0_VS_TGFB_IL6_TH17_ACT_CD4_TCELL_4H_DN	Pou2af1:Nsg2:Bcl2l11	down	3	1	0.000410248	0.0043076
GSE43955_TGFB_IL6_VS_TGFB_IL6_IL23_TH17_ACT_CD4_TCELL_60H_DN	Ctsw:Ikzf1:Dck	down	3	1	0.000410248	0.0043076
GSE43955_TH0_VS_TGFB_IL6_IL23_TH17_ACT_CD4_TCELL_60H_DN	Bcl2l11:Ugcg:Bcl6	down	3	1	0.000410248	0.0043076
GSE43863_NAIVE_VS_MEMORY_TFH_CD4_TCELL_D150_LCMV_UP	Sell:Dgka:Dck	down	3	1	0.000410248	0.0043076
GSE43863_NAIVE_VS_MEMORY_LY6C_INT_CXCR5POS_CD4_TCELL_D150_LCMV_UP	Sesn1:Gpr34:Tcf7	down	3	1	0.000410248	0.0043076
GSE43863_LY6C_INT_CXCR5POS_VS_LY6C_LOW_CXCR5NEG_EFFECTOR_CD4_TCELL_UP	Ugcg:Sell:Bcl6	down	3	1	0.000410248	0.0043076
GSE43863_TH1_VS_TFH_EFFECTOR_CD4_TCELL_DN	Cd27:St8sia6:Cpm	down	3	1	0.000410248	0.0043076
GSE44649_WT_VS_MIR155_KO_ACTIVATED_CD8_TCELL_DN	Ephx1:Itm2a:Gpr34	down	3	1	0.000402546	0.0043076
GSE46606_UNSTIM_VS_CD40L_IL2_IL5_3DAY_STIMULATED_IRF4HIGH_SORTED_BCELL_DN	Pou2af1:Lef1:Tmem158	down	3	1	0.000402546	0.0043076
GSE46606_UNSTIM_VS_CD40L_IL2_IL5_1DAY_STIMULATED_IRF4MID_SORTED_BCELL_UP	Gpr171:Tubb2b:Gpr174	down	3	1	0.000410248	0.0043076
GSE45739_UNSTIM_VS_ACD3_ACD28_STIM_NRAS_KO_CD4_TCELL_UP	Dgka:Lef1:Tcf7	down	3	1	0.000410248	0.0043076
GSE45739_UNSTIM_VS_ACD3_ACD28_STIM_WT_CD4_TCELL_UP	Dgka:Lef1:Sell	down	3	1	0.000410248	0.0043076
GSE41176_UNSTIM_VS_ANTI_IGM_STIM_BCELL_3H_DN	Sesn1:Evi2b:Stmn1	down	3	1	0.000380061	0.0043076
GSE45365_NK_CELL_VS_CD8A_DC_UP	St8sia6:Tcf7:Dck	down	3	1	0.000410248	0.0043076
GSE18804_SPLEEN_MACROPHAGE_VS_COLON_TUMORAL_MACROPHAGE_UP	Ctsw:Acsbg1:B4galnt1	down	3	1	0.000410248	0.0043076
KAECH_NAIVE_VS_MEMORY_CD8_TCELL_DN	Stmn1:Ctsw	down	2	1	0.00519776	0.023689
KAECH_DAY8_EFF_VS_MEMORY_CD8_TCELL_UP	Stmn1:Ugcg	down	2	1	0.00519776	0.023689
GOLDRATH_EFF_VS_MEMORY_CD8_TCELL_UP	Stmn1:Dck	down	2	1	0.00519776	0.023689
GSE10239_NAIVE_VS_MEMORY_CD8_TCELL_UP	Tubb2a:Bcl2l11	down	2	1	0.00519776	0.023689
GSE10239_MEMORY_VS_KLRG1HIGH_EFF_CD8_TCELL_UP	Tcf7:Cd27	down	2	1	0.00512595	0.023689
GSE10325_CD4_TCELL_VS_BCELL_UP	Itm2a:Lef1	down	2	1	0.00505474	0.023689
GSE11057_NAIVE_VS_EFF_MEMORY_CD4_TCELL_UP	Tcf7:Lef1	down	2	1	0.00498414	0.023689
GSE11057_CD4_EFF_MEM_VS_PBMC_UP	Gpr171:Itm2a	down	2	1	0.00505474	0.023689
GSE11057_PBMC_VS_MEM_CD4_TCELL_DN	S1pr1:Itm2a	down	2	1	0.00484474	0.023689
GSE11864_UNTREATED_VS_CSF1_IFNG_IN_MAC_UP	Evi2b:Tcf7	down	2	1	0.00464013	0.023689
GSE11864_CSF1_VS_CSF1_PAM3CYS_IN_MAC_UP	Sell:S1pr1	down	2	1	0.00491414	0.023689
GSE11864_CSF1_IFNG_VS_CSF1_PAM3CYS_IN_MAC_DN	Tubb2a:Ugcg	down	2	1	0.00498414	0.023689
GSE11924_TH1_VS_TH17_CD4_TCELL_UP	B4galnt1:Ugcg	down	2	1	0.00519776	0.023689
GSE11924_TH2_VS_TH17_CD4_TCELL_DN	Tubb2b:B4galnt1	down	2	1	0.00519776	0.023689
GSE12366_GC_BCELL_VS_PLASMA_CELL_UP	Cpm:Tubb2a	down	2	1	0.00491414	0.023689
GSE12366_GC_VS_NAIVE_BCELL_UP	Pou2af1:Bcl6	down	2	1	0.00505474	0.023689
GSE12366_GC_VS_NAIVE_BCELL_DN	Dgka:Sell	down	2	1	0.00484474	0.023689
GSE12366_GC_VS_MEMORY_BCELL_UP	Pou2af1:Tubb2a	down	2	1	0.00505474	0.023689
GSE12366_GC_VS_MEMORY_BCELL_DN	Dgka:Sesn1	down	2	1	0.00498414	0.023689
GSE12845_IGD_POS_VS_NEG_BLOOD_BCELL_UP	Sesn1:Bcl6	down	2	1	0.00512595	0.023689
GSE12845_IGD_POS_BLOOD_VS_NAIVE_TONSIL_BCELL_DN	Ikzf1:Lmo4	down	2	1	0.00505474	0.023689
GSE12845_NAIVE_VS_PRE_GC_TONSIL_BCELL_DN	Bcl6:Cd27	down	2	1	0.00519776	0.023689
GSE13229_IMM_VS_MATURE_NKCELL_UP	Nsg2:Tcf7	down	2	1	0.00519776	0.023689
GSE13229_IMM_VS_INTMATURE_NKCELL_UP	Cd27:Nsg2	down	2	1	0.00519776	0.023689
GSE13306_TREG_VS_TCONV_LAMINA_PROPRIA_UP	Tubb2b:Gpr174	down	2	1	0.00519776	0.023689
GSE13306_TREG_VS_TCONV_SPLEEN_DN	Gpr171:Sytl2	down	2	1	0.00519776	0.023689
GSE13411_NAIVE_VS_IGM_MEMORY_BCELL_DN	Lmo4:Cd27	down	2	1	0.00505474	0.023689
GSE13411_PLASMA_CELL_VS_MEMORY_BCELL_DN	Sell:Dck	down	2	1	0.00498414	0.023689
GSE13484_UNSTIM_VS_12H_YF17D_VACCINE_STIM_PBMC_UP	Dgka:Cd27	down	2	1	0.00512595	0.023689
GSE13484_3H_UNSTIM_VS_YF17D_VACCINE_STIM_PBMC_DN	Gpr171:Bcl6	down	2	1	0.00505474	0.023689
GSE13493_CD4INTCD8POS_VS_CD8POS_THYMOCYTE_DN	Sell:Dgka	down	2	1	0.00512595	0.023689
GSE13738_RESTING_VS_BYSTANDER_ACTIVATED_CD4_TCELL_UP	Sell:Tcf7	down	2	1	0.00457312	0.023689
GSE13738_TCR_VS_BYSTANDER_ACTIVATED_CD4_TCELL_UP	Cd27:Sell	down	2	1	0.00505474	0.023689
GSE14000_UNSTIM_VS_16H_LPS_DC_TRANSLATED_RNA_DN	Tubb2a:Neurl3	down	2	1	0.00498414	0.023689
GSE14026_TH1_VS_TH17_DN	Stmn1:Dck	down	2	1	0.00519776	0.023689
GSE14308_TH1_VS_TH17_UP	Stmn1:S1pr1	down	2	1	0.00519776	0.023689
GSE1448_CTRL_VS_ANTI_VBETA5_DP_THYMOCYTE_UP	Nsg2:Dck	down	2	1	0.00519776	0.023689
GSE1448_ANTI_VALPHA2_VS_VBETA5_DP_THYMOCYTE_UP	Nsg2:Tubb2a	down	2	1	0.00519776	0.023689
GSE1460_INTRATHYMIC_T_PROGENITOR_VS_CD4_THYMOCYTE_DN	S1pr1:Cd27	down	2	1	0.00512595	0.023689
GSE1460_INTRATHYMIC_T_PROGENITOR_VS_THYMIC_STROMAL_CELL_DN	Tubb2a:Tmem158	down	2	1	0.00519776	0.023689
GSE1460_DP_VS_CD4_THYMOCYTE_UP	Stmn1:Acsbg1	down	2	1	0.00519776	0.023689
GSE1460_CD4_THYMOCYTE_VS_NAIVE_CD4_TCELL_CORD_BLOOD_UP	Stmn1:Itm2a	down	2	1	0.00519776	0.023689
GSE1460_CD4_THYMOCYTE_VS_NAIVE_CD4_TCELL_ADULT_BLOOD_UP	Stmn1:Itm2a	down	2	1	0.00512595	0.023689
GSE14769_UNSTIM_VS_80MIN_LPS_BMDM_DN	Bcl6:Bcl2l11	down	2	1	0.00519776	0.023689
GSE14769_UNSTIM_VS_120MIN_LPS_BMDM_DN	Bcl6:Gpr174	down	2	1	0.00519776	0.023689
GSE14769_20MIN_VS_360MIN_LPS_BMDM_DN	Sell:Dgka	down	2	1	0.00519776	0.023689
GSE15324_NAIVE_VS_ACTIVATED_CD8_TCELL_UP	Sytl2:Gpr34	down	2	1	0.00519776	0.023689
GSE15930_NAIVE_VS_24H_IN_VITRO_STIM_IL12_CD8_TCELL_UP	Bcl6:S1pr1	down	2	1	0.00519776	0.023689
GSE15930_NAIVE_VS_72H_IN_VITRO_STIM_CD8_TCELL_DN	Dck:Stmn1	down	2	1	0.00519776	0.023689
GSE15930_NAIVE_VS_72H_IN_VITRO_STIM_TRICHOSTATINA_CD8_TCELL_UP	Bcl6:S1pr1	down	2	1	0.00519776	0.023689
GSE15930_NAIVE_VS_72H_IN_VITRO_STIM_TRICHOSTATINA_CD8_TCELL_DN	Dck:Pou2af1	down	2	1	0.00512595	0.023689
GSE15930_STIM_VS_STIM_AND_IL12_24H_CD8_T_CELL_UP	B4galnt1:S1pr1	down	2	1	0.00519776	0.023689
GSE15930_STIM_VS_STIM_AND_TRICHOSTATINA_72H_CD8_T_CELL_UP	S1pr1:B4galnt1	down	2	1	0.00519776	0.023689
GSE17580_TREG_VS_TEFF_DN	Tcf7:Lef1	down	2	1	0.00519776	0.023689
GSE17721_CTRL_VS_LPS_24H_BMDC_UP	Bcl2l11:Sesn1	down	2	1	0.00512595	0.023689
GSE17721_CTRL_VS_POLYIC_8H_BMDC_UP	Tubb2b:Sesn1	down	2	1	0.00512595	0.023689
GSE17721_CTRL_VS_GARDIQUIMOD_2H_BMDC_DN	Lmo4:Bcl2l11	down	2	1	0.00519776	0.023689
GSE17721_CTRL_VS_GARDIQUIMOD_6H_BMDC_UP	Tubb2b:Sesn1	down	2	1	0.00519776	0.023689
GSE17721_LPS_VS_POLYIC_2H_BMDC_UP	Tubb2a:Lmo4	down	2	1	0.00519776	0.023689
GSE17721_POLYIC_VS_PAM3CSK4_12H_BMDC_DN	Lmo4:S1pr1	down	2	1	0.00519776	0.023689
GSE17721_PAM3CSK4_VS_CPG_4H_BMDC_UP	Tubb2a:Prg4	down	2	1	0.00519776	0.023689
GSE17721_CPG_VS_GARDIQUIMOD_16H_BMDC_UP	Bcl2l11:Tubb2a	down	2	1	0.00519776	0.023689
GSE17721_LPS_VS_PAM3CSK4_2H_BMDC_UP	Sh3bgrl2:Dck	down	2	1	0.00519776	0.023689
GSE17721_LPS_VS_PAM3CSK4_16H_BMDC_DN	Stmn1:Evi2b	down	2	1	0.00519776	0.023689
GSE17721_LPS_VS_PAM3CSK4_24H_BMDC_DN	Stmn1:Bcl6	down	2	1	0.00519776	0.023689
GSE17721_POLYIC_VS_CPG_2H_BMDC_DN	Tubb2a:Bcl2l11	down	2	1	0.00519776	0.023689
GSE17721_PAM3CSK4_VS_GADIQUIMOD_12H_BMDC_UP	Stmn1:B4galnt1	down	2	1	0.00519776	0.023689
GSE17721_PAM3CSK4_VS_GADIQUIMOD_24H_BMDC_DN	Tubb2a:Dck	down	2	1	0.00519776	0.023689
GSE17721_POLYIC_VS_GARDIQUIMOD_2H_BMDC_UP	Evi2b:Tubb2b	down	2	1	0.00519776	0.023689
GSE17721_POLYIC_VS_GARDIQUIMOD_24H_BMDC_UP	Cd27:Nsg2	down	2	1	0.00519776	0.023689
GSE17721_0.5H_VS_4H_PAM3CSK4_BMDC_UP	Tubb2a:Dgka	down	2	1	0.00519776	0.023689
GSE17721_12H_VS_24H_PAM3CSK4_BMDC_DN	Dgka:Prg4	down	2	1	0.00519776	0.023689
GSE17721_0.5H_VS_4H_CPG_BMDC_UP	Dgka:Evi2b	down	2	1	0.00519776	0.023689
GSE17721_0.5H_VS_24H_CPG_BMDC_DN	Lmo4:Dgka	down	2	1	0.00519776	0.023689
GSE17721_12H_VS_24H_GARDIQUIMOD_BMDC_DN	Sh3bgrl2:Stmn1	down	2	1	0.00519776	0.023689
GSE17974_0H_VS_48H_IN_VITRO_ACT_CD4_TCELL_UP	Sell:Evi2b	down	2	1	0.00437565	0.023689
GSE17974_IL4_AND_ANTI_IL12_VS_UNTREATED_1H_ACT_CD4_TCELL_UP	S1pr1:Evi2b	down	2	1	0.00412058	0.023689
GSE17974_IL4_AND_ANTI_IL12_VS_UNTREATED_2H_ACT_CD4_TCELL_UP	Bcl2l11:S1pr1	down	2	1	0.00464013	0.023689
GSE17974_IL4_AND_ANTI_IL12_VS_UNTREATED_48H_ACT_CD4_TCELL_UP	Evi2b:Bcl2l11	down	2	1	0.00484474	0.023689
GSE17974_IL4_AND_ANTI_IL12_VS_UNTREATED_48H_ACT_CD4_TCELL_DN	Lmo4:Tcf7	down	2	1	0.00477594	0.023689
GSE17974_1.5H_VS_72H_IL4_AND_ANTI_IL12_ACT_CD4_TCELL_UP	Tcf7:S1pr1	down	2	1	0.00512595	0.023689
GSE18791_CTRL_VS_NEWCASTLE_VIRUS_DC_14H_DN	Sytl2:Neurl3	down	2	1	0.00450671	0.023689
GSE18791_UNSTIM_VS_NEWCATSLE_VIRUS_DC_1H_UP	Itm2a:Noxa1	down	2	1	0.00424694	0.023689
GSE19825_NAIVE_VS_DAY3_EFF_CD8_TCELL_DN	Stmn1:Tubb2a	down	2	1	0.00519776	0.023689
GSE20366_EX_VIVO_VS_HOMEOSTATIC_CONVERSION_TREG_DN	Stmn1:Lef1	down	2	1	0.00519776	0.023689
GSE20366_EX_VIVO_VS_DEC205_CONVERSION_NAIVE_CD4_TCELL_UP	Nsg2:Gpr34	down	2	1	0.00512595	0.023689
GSE20366_TREG_VS_NAIVE_CD4_TCELL_HOMEOSTATIC_CONVERSION_UP	Sesn1:Sell	down	2	1	0.00519776	0.023689
GSE20366_TREG_VS_NAIVE_CD4_TCELL_DEC205_CONVERSION_DN	Dapl1:Nsg2	down	2	1	0.00519776	0.023689
GSE20366_CD103_POS_VS_CD103_KLRG1_DP_TREG_DN	Sytl2:Cpm	down	2	1	0.00519776	0.023689
GSE20715_0H_VS_6H_OZONE_LUNG_DN	S1pr1:Bcl2l11	down	2	1	0.00519776	0.023689
GSE20715_0H_VS_48H_OZONE_LUNG_UP	Evi2b:Sesn1	down	2	1	0.00519776	0.023689
GSE22886_CD8_VS_CD4_NAIVE_TCELL_UP	Sytl2:Gpr171	down	2	1	0.00512595	0.023689
GSE22886_NAIVE_CD8_TCELL_VS_MEMORY_TCELL_UP	Tcf7:Sytl2	down	2	1	0.00477594	0.023689
GSE22886_NAIVE_CD8_TCELL_VS_MEMORY_TCELL_DN	Sesn1:Evi2b	down	2	1	0.00512595	0.023689
GSE22886_NAIVE_VS_MEMORY_TCELL_DN	Sesn1:Evi2b	down	2	1	0.00512595	0.023689
GSE22886_NAIVE_VS_IGG_IGA_MEMORY_BCELL_DN	Cd27:Lmo4	down	2	1	0.00491414	0.023689
GSE22886_NAIVE_VS_IGM_MEMORY_BCELL_DN	Cd27:Lmo4	down	2	1	0.00498414	0.023689
GSE22886_NAIVE_BCELL_VS_BM_PLASMA_CELL_DN	Cd27:Tubb2a	down	2	1	0.00505474	0.023689
GSE22886_NEUTROPHIL_VS_DC_UP	Pou2af1:Sell	down	2	1	0.00512595	0.023689
GSE22886_NAIVE_BCELL_VS_DC_UP	Sell:Pou2af1	down	2	1	0.00498414	0.023689
GSE22886_NAIVE_CD8_TCELL_VS_NEUTROPHIL_UP	Gpr171:Itm2a	down	2	1	0.00519776	0.023689
GSE22886_TH1_VS_TH2_48H_ACT_UP	Pou2af1:Tubb2b	down	2	1	0.00505474	0.023689
GSE24081_CONTROLLER_VS_PROGRESSOR_HIV_SPECIFIC_CD8_TCELL_UP	Sesn1:Tubb2a	down	2	1	0.00505474	0.023689
GSE24142_DN2_VS_DN3_THYMOCYTE_FETAL_DN	Sh3bgrl2:Gpr34	down	2	1	0.00519776	0.023689
GSE24142_ADULT_VS_FETAL_EARLY_THYMIC_PROGENITOR_UP	Bcl6:Sell	down	2	1	0.00519776	0.023689
GSE24142_ADULT_VS_FETAL_EARLY_THYMIC_PROGENITOR_DN	S1pr1:Tubb2b	down	2	1	0.00519776	0.023689
GSE24142_ADULT_VS_FETAL_DN3_THYMOCYTE_DN	Sh3bgrl2:Gpr34	down	2	1	0.00519776	0.023689
GSE24634_NAIVE_CD4_TCELL_VS_DAY5_IL4_CONV_TREG_UP	Bcl6:Cd27	down	2	1	0.00512595	0.023689
GSE24634_IL4_VS_CTRL_TREATED_NAIVE_CD4_TCELL_DAY3_DN	Tcf7:Sell	down	2	1	0.00519776	0.023689
GSE25087_FETAL_VS_ADULT_TCONV_UP	Bcl2l11:Lmo4	down	2	1	0.00505474	0.023689
GSE25087_TREG_VS_TCONV_ADULT_UP	Gpr174:Bcl2l11	down	2	1	0.00505474	0.023689
GSE26495_NAIVE_VS_PD1HIGH_CD8_TCELL_UP	Lef1:Sell	down	2	1	0.00464013	0.023689
GSE26669_CD4_VS_CD8_TCELL_IN_MLR_UP	Cpm:Itm2a	down	2	1	0.00519776	0.023689
GSE26669_CD4_VS_CD8_TCELL_IN_MLR_COSTIM_BLOCK_UP	Stmn1:Cpm	down	2	1	0.00519776	0.023689
GSE26669_CD4_VS_CD8_TCELL_IN_MLR_COSTIM_BLOCK_DN	Cd27:B4galnt1	down	2	1	0.00519776	0.023689
GSE26928_NAIVE_VS_CXCR5_POS_CD4_TCELL_UP	Ikzf1:Dgka	down	2	1	0.00470774	0.023689
GSE2706_UNSTIM_VS_2H_R848_DC_DN	Tubb2a:Neurl3	down	2	1	0.00464013	0.023689
GSE2706_UNSTIM_VS_8H_R848_DC_DN	Ugcg:Neurl3	down	2	1	0.00491414	0.023689
GSE27786_LSK_VS_BCELL_DN	Ikzf1:Tubb2b	down	2	1	0.00519776	0.023689
GSE27786_LSK_VS_NKCELL_DN	Tubb2a:Lef1	down	2	1	0.00519776	0.023689
GSE27786_LSK_VS_NKTCELL_DN	Cd27:S1pr1	down	2	1	0.00519776	0.023689
GSE27786_LIN_NEG_VS_CD4_TCELL_DN	Ikzf1:Gpr171	down	2	1	0.00519776	0.023689
GSE27786_BCELL_VS_ERYTHROBLAST_UP	Ikzf1:Lmo4	down	2	1	0.00519776	0.023689
GSE27786_CD4_VS_CD8_TCELL_UP	Cpm:Stmn1	down	2	1	0.00519776	0.023689
GSE27786_CD4_VS_CD8_TCELL_DN	B4galnt1:Ctsw	down	2	1	0.00512595	0.023689
GSE27786_NKCELL_VS_NKTCELL_DN	Tcf7:Ikzf1	down	2	1	0.00505474	0.023689
GSE27786_NKTCELL_VS_ERYTHROBLAST_UP	S1pr1:Bcl6	down	2	1	0.00519776	0.023689
GSE27786_NKTCELL_VS_MONO_MAC_DN	Tmem158:St8sia6	down	2	1	0.00519776	0.023689
GSE27786_NEUTROPHIL_VS_MONO_MAC_DN	St8sia6:Ctsw	down	2	1	0.00512595	0.023689
GSE2826_WT_VS_XID_BCELL_UP	Ephx1:Dgka	down	2	1	0.00519776	0.023689
GSE29617_DAY3_VS_DAY7_TIV_FLU_VACCINE_PBMC_2008_DN	Pou2af1:Dgka	down	2	1	0.00450671	0.023689
GSE29618_BCELL_VS_MONOCYTE_UP	Pou2af1:S1pr1	down	2	1	0.00470774	0.023689
GSE29618_BCELL_VS_PDC_DN	Ugcg:Gpr171	down	2	1	0.00505474	0.023689
GSE29618_BCELL_VS_MDC_UP	Pou2af1:S1pr1	down	2	1	0.00470774	0.023689
GSE29618_MONOCYTE_VS_PDC_UP	Evi2b:Bcl6	down	2	1	0.00512595	0.023689
GSE29618_BCELL_VS_MONOCYTE_DAY7_FLU_VACCINE_UP	Pou2af1:Itm2a	down	2	1	0.00484474	0.023689
GSE29618_PRE_VS_DAY7_FLU_VACCINE_PDC_UP	Lef1:Tmem158	down	2	1	0.00505474	0.023689
GSE29618_PRE_VS_DAY7_POST_TIV_FLU_VACCINE_MDC_UP	Ikzf1:Ugcg	down	2	1	0.00512595	0.023689
GSE29618_LAIV_VS_TIV_FLU_VACCINE_DAY7_MDC_DN	Itm2a:Acsbg1	down	2	1	0.00498414	0.023689
GSE30083_SP1_VS_SP3_THYMOCYTE_UP	Sytl2:Itm2a	down	2	1	0.00512595	0.023689
GSE30083_SP2_VS_SP3_THYMOCYTE_UP	Pou2af1:Sytl2	down	2	1	0.00519776	0.023689
GSE30083_SP2_VS_SP4_THYMOCYTE_UP	Itm2a:Sytl2	down	2	1	0.00519776	0.023689
GSE30083_SP3_VS_SP4_THYMOCYTE_UP	Tubb2b:Itm2a	down	2	1	0.00519776	0.023689
GSE30962_PRIMARY_VS_SECONDARY_ACUTE_LCMV_INF_CD8_TCELL_UP	Stmn1:Tcf7	down	2	1	0.00519776	0.023689
GSE30962_ACUTE_VS_CHRONIC_LCMV_PRIMARY_INF_CD8_TCELL_UP	Sesn1:Cpm	down	2	1	0.00519776	0.023689
GSE30962_ACUTE_VS_CHRONIC_LCMV_SECONDARY_INF_CD8_TCELL_UP	Tcf7:Lef1	down	2	1	0.00519776	0.023689
GSE31082_DP_VS_CD8_SP_THYMOCYTE_DN	Dapl1:Cpm	down	2	1	0.00512595	0.023689
GSE32423_MEMORY_VS_NAIVE_CD8_TCELL_IL7_DN	Ephx1:Tubb2b	down	2	1	0.00519776	0.023689
GSE32423_MEMORY_VS_NAIVE_CD8_TCELL_IL7_IL4_DN	Tubb2b:Lef1	down	2	1	0.00519776	0.023689
GSE32423_CTRL_VS_IL4_MEMORY_CD8_TCELL_UP	Cpm:Dapl1	down	2	1	0.00519776	0.023689
GSE32423_IL7_VS_IL7_IL4_NAIVE_CD8_TCELL_DN	Itm2a:Bcl6	down	2	1	0.00519776	0.023689
GSE339_CD4POS_VS_CD8POS_DC_UP	Sesn1:B4galnt1	down	2	1	0.00519776	0.023689
GSE339_CD4POS_VS_CD8POS_DC_IN_CULTURE_UP	Tcf7:B4galnt1	down	2	1	0.00519776	0.023689
GSE34205_HEALTHY_VS_RSV_INF_INFANT_PBMC_DN	Stmn1:Bcl6	down	2	1	0.00519776	0.023689
GSE360_CTRL_VS_L_DONOVANI_DC_DN	Tubb2a:Ugcg	down	2	1	0.00519776	0.023689
GSE360_CTRL_VS_T_GONDII_DC_DN	B4galnt1:Tubb2a	down	2	1	0.00505474	0.023689
GSE360_CTRL_VS_B_MALAYI_HIGH_DOSE_DC_DN	Ugcg:Tubb2a	down	2	1	0.00505474	0.023689
GSE360_DC_VS_MAC_L_DONOVANI_UP	Lef1:Ephx1	down	2	1	0.00519776	0.023689
GSE360_DC_VS_MAC_B_MALAYI_HIGH_DOSE_DN	Tubb2a:Sell	down	2	1	0.00519776	0.023689
GSE360_L_DONOVANI_VS_T_GONDII_DC_DN	Ephx1:Stmn1	down	2	1	0.00498414	0.023689
GSE360_L_DONOVANI_VS_B_MALAYI_HIGH_DOSE_DC_UP	Ugcg:Sell	down	2	1	0.00512595	0.023689
GSE360_L_DONOVANI_VS_B_MALAYI_LOW_DOSE_DC_UP	Tubb2a:Sell	down	2	1	0.00512595	0.023689
GSE360_L_DONOVANI_VS_M_TUBERCULOSIS_DC_DN	Tubb2a:Cd27	down	2	1	0.00498414	0.023689
GSE360_L_MAJOR_VS_T_GONDII_DC_DN	B4galnt1:S1pr1	down	2	1	0.00505474	0.023689
GSE360_HIGH_DOSE_B_MALAYI_VS_M_TUBERCULOSIS_DC_UP	Tmem158:Lmo4	down	2	1	0.00519776	0.023689
GSE360_LOW_DOSE_B_MALAYI_VS_M_TUBERCULOSIS_DC_DN	Tubb2a:Cd27	down	2	1	0.00505474	0.023689
GSE360_L_DONOVANI_VS_B_MALAYI_HIGH_DOSE_MAC_DN	Ephx1:Cd27	down	2	1	0.00519776	0.023689
GSE36476_CTRL_VS_TSST_ACT_16H_MEMORY_CD4_TCELL_YOUNG_UP	Evi2b:Lef1	down	2	1	0.00498414	0.023689
GSE36476_CTRL_VS_TSST_ACT_40H_MEMORY_CD4_TCELL_YOUNG_UP	Evi2b:Lef1	down	2	1	0.00498414	0.023689
GSE36476_CTRL_VS_TSST_ACT_16H_MEMORY_CD4_TCELL_OLD_UP	Lef1:Itm2a	down	2	1	0.00505474	0.023689
GSE36476_CTRL_VS_TSST_ACT_40H_MEMORY_CD4_TCELL_OLD_DN	Stmn1:Bcl2l11	down	2	1	0.00519776	0.023689
GSE36476_CTRL_VS_TSST_ACT_72H_MEMORY_CD4_TCELL_OLD_DN	Stmn1:Tubb2b	down	2	1	0.00519776	0.023689
GSE36476_YOUNG_VS_OLD_DONOR_MEMORY_CD4_TCELL_UP	Pou2af1:Ephx1	down	2	1	0.00450671	0.023689
GSE36476_YOUNG_VS_OLD_DONOR_MEMORY_CD4_TCELL_40H_TSST_ACT_DN	Bcl6:Ugcg	down	2	1	0.00498414	0.023689
GSE3982_CTRL_VS_LPS_1H_NEUTROPHIL_DN	Acsbg1:Tcf7	down	2	1	0.00505474	0.023689
GSE3982_DC_VS_NEUTROPHIL_LPS_STIM_DN	Sytl2:B4galnt1	down	2	1	0.00477594	0.023689
GSE3982_MAC_VS_NEUTROPHIL_LPS_STIM_UP	Dck:Cpm	down	2	1	0.00512595	0.023689
GSE3982_EOSINOPHIL_VS_CENT_MEMORY_CD4_TCELL_UP	Evi2b:Bcl6	down	2	1	0.00519776	0.023689
GSE3982_EOSINOPHIL_VS_NKCELL_UP	Bcl6:Acsbg1	down	2	1	0.00498414	0.023689
GSE3982_EOSINOPHIL_VS_TH2_DN	Pou2af1:Dck	down	2	1	0.00498414	0.023689
GSE3982_MAST_CELL_VS_CENT_MEMORY_CD4_TCELL_DN	Tcf7:Evi2b	down	2	1	0.00498414	0.023689
GSE3982_MAST_CELL_VS_TH2_DN	Dgka:Cd27	down	2	1	0.00512595	0.023689
GSE3982_DC_VS_BCELL_DN	Tcf7:S1pr1	down	2	1	0.00498414	0.023689
GSE3982_DC_VS_TH1_UP	Bcl6:Sesn1	down	2	1	0.00519776	0.023689
GSE3982_MAC_VS_CENT_MEMORY_CD4_TCELL_UP	Cpm:Ephx1	down	2	1	0.00519776	0.023689
GSE3982_MAC_VS_TH1_DN	Stmn1:Dgka	down	2	1	0.00512595	0.023689
GSE3982_MAC_VS_TH2_DN	Dgka:Cd27	down	2	1	0.00512595	0.023689
GSE3982_NEUTROPHIL_VS_BCELL_DN	S1pr1:Dck	down	2	1	0.00512595	0.023689
GSE3982_NEUTROPHIL_VS_BASOPHIL_UP	Bcl6:Tmem158	down	2	1	0.00491414	0.023689
GSE3982_BASOPHIL_VS_TH1_DN	Stmn1:Sytl2	down	2	1	0.00512595	0.023689
GSE3982_BASOPHIL_VS_TH2_DN	Gpr171:Sytl2	down	2	1	0.00512595	0.023689
GSE3982_EFF_MEMORY_CD4_TCELL_VS_NKCELL_DN	Ctsw:Ephx1	down	2	1	0.00498414	0.023689
GSE3982_CENT_MEMORY_CD4_TCELL_VS_TH2_UP	Sesn1:Sell	down	2	1	0.00505474	0.023689
GSE39820_CTRL_VS_TGFBETA1_IL6_IL23A_CD4_TCELL_UP	Sell:Gpr34	down	2	1	0.00512595	0.023689
GSE39820_TGFBETA1_VS_TGFBETA3_IN_IL6_IL23A_TREATED_CD4_TCELL_UP	Tubb2a:Ugcg	down	2	1	0.00519776	0.023689
GSE5463_CTRL_VS_DEXAMETHASONE_TREATED_THYMOCYTE_DN	Lmo4:Dck	down	2	1	0.00512595	0.023689
GSE6269_HEALTHY_VS_STAPH_PNEUMO_INF_PBMC_DN	Ephx1:Bcl6	down	2	1	0.00324612	0.023689
GSE7460_CTRL_VS_TGFB_TREATED_ACT_CD8_TCELL_DN	Gpr171:Gpr34	down	2	1	0.00519776	0.023689
GSE7460_CTRL_VS_TGFB_TREATED_ACT_TREG_DN	Prg4:Ctsw	down	2	1	0.00512595	0.023689
GSE7460_CD8_TCELL_VS_CD4_TCELL_ACT_UP	Ctsw:B4galnt1	down	2	1	0.00519776	0.023689
GSE7460_TREG_VS_TCONV_ACT_WITH_TGFB_UP	Prg4:Tubb2b	down	2	1	0.00512595	0.023689
GSE7460_TREG_VS_TCONV_ACT_WITH_TGFB_DN	Dapl1:Lef1	down	2	1	0.00512595	0.023689
GSE7460_CTRL_VS_TGFB_TREATED_ACT_TCONV_DN	Ctsw:Acsbg1	down	2	1	0.00519776	0.023689
GSE7460_CTRL_VS_TGFB_TREATED_ACT_FOXP3_MUT_TCONV_UP	St8sia6:Gpr174	down	2	1	0.00519776	0.023689
GSE7460_FOXP3_MUT_VS_HET_ACT_TCONV_DN	Ephx1:Tcf7	down	2	1	0.00519776	0.023689
GSE7460_CTRL_VS_FOXP3_OVEREXPR_TCONV_DN	Tmem158:Gpr34	down	2	1	0.00519776	0.023689
GSE7764_NKCELL_VS_SPLENOCYTE_UP	Sytl2:Ugcg	down	2	1	0.00519776	0.023689
GSE7764_NKCELL_VS_SPLENOCYTE_DN	Dgka:Ephx1	down	2	1	0.00519776	0.023689
GSE7764_IL15_TREATED_VS_CTRL_NK_CELL_24H_DN	S1pr1:Lef1	down	2	1	0.00519776	0.023689
GSE7852_TREG_VS_TCONV_LN_UP	Tmem158:Sesn1	down	2	1	0.00519776	0.023689
GSE7852_LN_VS_THYMUS_TREG_UP	Prg4:Cpm	down	2	1	0.00512595	0.023689
GSE7852_LN_VS_THYMUS_TREG_DN	Lmo4:Tcf7	down	2	1	0.00519776	0.023689
GSE7852_LN_VS_FAT_TREG_UP	B4galnt1:S1pr1	down	2	1	0.00512595	0.023689
GSE7852_LN_VS_THYMUS_TCONV_UP	S1pr1:Dapl1	down	2	1	0.00519776	0.023689
GSE7852_LN_VS_THYMUS_TCONV_DN	Itm2a:Cd27	down	2	1	0.00519776	0.023689
GSE7852_THYMUS_VS_FAT_TCONV_UP	Lef1:Itm2a	down	2	1	0.00519776	0.023689
GSE7852_TREG_VS_TCONV_UP	Sh3bgrl2:Tmem158	down	2	1	0.00519776	0.023689
GSE8384_CTRL_VS_B_ABORTUS_4H_MAC_CELL_LINE_UP	Sesn1:Lmo4	down	2	1	0.00512595	0.023689
GSE8678_IL7R_LOW_VS_HIGH_EFF_CD8_TCELL_UP	Tubb2b:Sytl2	down	2	1	0.00512595	0.023689
GSE9006_HEALTHY_VS_TYPE_1_DIABETES_PBMC_AT_DX_DN	Sell:S1pr1	down	2	1	0.00505474	0.023689
GSE9006_TYPE_1_DIABETES_AT_DX_VS_4MONTH_POST_DX_PBMC_DN	Gpr171:Lmo4	down	2	1	0.00477594	0.023689
GSE9037_CTRL_VS_LPS_1H_STIM_IRAK4_KO_BMDM_DN	Tubb2a:Tubb2b	down	2	1	0.00519776	0.023689
GSE9650_NAIVE_VS_MEMORY_CD8_TCELL_DN	Stmn1:Ctsw	down	2	1	0.00519776	0.023689
GSE9650_EFFECTOR_VS_EXHAUSTED_CD8_TCELL_UP	Lef1:Dgka	down	2	1	0.00519776	0.023689
GSE9650_GP33_VS_GP276_LCMV_SPECIFIC_EXHAUSTED_CD8_TCELL_DN	Bcl2l11:Lef1	down	2	1	0.00519776	0.023689
GSE369_SOCS3_KO_VS_WT_LIVER_POST_IL6_INJECTION_DN	S1pr1:Ikzf1	down	2	1	0.00519776	0.023689
GSE369_IFNG_KO_VS_WT_LIVER_UP	Ephx1:Lef1	down	2	1	0.00505474	0.023689
GSE369_PRE_VS_POST_IL6_INJECTION_SOCS3_KO_LIVER_DN	Ikzf1:Ephx1	down	2	1	0.00519776	0.023689
GSE411_UNSTIM_VS_100MIN_IL6_STIM_MACROPHAGE_UP	Tubb2a:Gpr34	down	2	1	0.00519776	0.023689
GSE411_WT_VS_SOCS3_KO_MACROPHAGE_IL6_STIM_400MIN_UP	Gpr171:Gpr34	down	2	1	0.00519776	0.023689
GSE2770_UNTREATED_VS_TGFB_AND_IL4_TREATED_ACT_CD4_TCELL_4H_UP	Ugcg:Ephx1	down	2	1	0.00519776	0.023689
GSE2770_UNTREATED_VS_ACT_CD4_TCELL_2H_UP	S1pr1:B4galnt1	down	2	1	0.00512595	0.023689
GSE2770_UNTREATED_VS_IL4_TREATED_ACT_CD4_TCELL_6H_UP	Stmn1:Sell	down	2	1	0.00519776	0.023689
GSE2770_UNTREATED_VS_IL4_TREATED_ACT_CD4_TCELL_2H_UP	Sytl2:Tmem158	down	2	1	0.00519776	0.023689
GSE2770_IL12_VS_IL4_TREATED_ACT_CD4_TCELL_2H_DN	Stmn1:St8sia6	down	2	1	0.00381483	0.023689
GSE2770_UNTREATED_VS_TGFB_AND_IL4_TREATED_ACT_CD4_TCELL_48H_UP	Prg4:Pou2af1	down	2	1	0.00346683	0.023689
GSE2770_IL4_ACT_VS_ACT_CD4_TCELL_6H_UP	Lmo4:Bcl6	down	2	1	0.00505474	0.023689
GSE2128_C57BL6_VS_NOD_CD4CD8_DP_THYMOCYTE_DN	St8sia6:Dgka	down	2	1	0.00519776	0.023689
GSE2405_HEAT_KILLED_LYSATE_VS_LIVE_A_PHAGOCYTOPHILUM_STIM_NEUTROPHIL_9H_UP	Stmn1:Tcf7	down	2	1	0.00519776	0.023689
GSE2405_S_AUREUS_VS_UNTREATED_NEUTROPHIL_DN	Stmn1:Tubb2a	down	2	1	0.00512595	0.023689
GSE2405_S_AUREUS_VS_A_PHAGOCYTOPHILUM_NEUTROPHIL_UP	Dapl1:Tmem158	down	2	1	0.00519776	0.023689
GSE2405_0H_VS_1.5H_A_PHAGOCYTOPHILUM_STIM_NEUTROPHIL_DN	Tcf7:Nsg2	down	2	1	0.00519776	0.023689
GSE8835_HEALTHY_VS_CLL_CD4_TCELL_DN	Prg4:Gpr171	down	2	1	0.00519776	0.023689
GSE2585_CTEC_VS_THYMIC_DC_DN	B4galnt1:Ephx1	down	2	1	0.00519776	0.023689
GSE2585_THYMIC_DC_VS_THYMIC_MACROPHAGE_DN	Bcl2l11:Cd27	down	2	1	0.00505474	0.023689
GSE1925_3H_VS_24H_IFNG_STIM_MACROPHAGE_DN	Cd27:Dgka	down	2	1	0.00498414	0.023689
GSE1925_CTRL_VS_IFNG_PRIMED_MACROPHAGE_3H_IFNG_STIM_UP	Tcf7:Sell	down	2	1	0.00424694	0.023689
GSE2935_UV_INACTIVATED_VS_LIVE_SENDAI_VIRUS_INF_MACROPHAGE_DN	Ctsw:Sytl2	down	2	1	0.00437565	0.023689
GSE3565_CTRL_VS_LPS_INJECTED_DUSP1_KO_SPLENOCYTES_UP	Sytl2:Ctsw	down	2	1	0.00437565	0.023689
GSE3720_LPS_VS_PMA_STIM_VD1_GAMMADELTA_TCELL_DN	Sell:Neurl3	down	2	1	0.00418347	0.023689
GSE3720_VD1_VS_VD2_GAMMADELTA_TCELL_WITH_LPS_STIM_UP	B4galnt1:Tmem158	down	2	1	0.00519776	0.023689
GSE3720_VD1_VS_VD2_GAMMADELTA_TCELL_WITH_LPS_STIM_DN	Ikzf1:Stmn1	down	2	1	0.00519776	0.023689
GSE3720_VD1_VS_VD2_GAMMADELTA_TCELL_DN	Pou2af1:Stmn1	down	2	1	0.00519776	0.023689
GSE3691_IFN_PRODUCING_KILLER_DC_VS_PLASMACYTOID_DC_SPLEEN_UP	Acsbg1:Sesn1	down	2	1	0.00519776	0.023689
GSE3994_WT_VS_PAC1_KO_ACTIVATED_MAST_CELL_UP	Sh3bgrl2:Prg4	down	2	1	0.00519776	0.023689
GSE3994_WT_VS_PAC1_KO_ACTIVATED_MAST_CELL_DN	Bcl2l11:Sell	down	2	1	0.00519776	0.023689
GSE4142_NAIVE_BCELL_VS_PLASMA_CELL_UP	Ctsw:Prg4	down	2	1	0.00519776	0.023689
GSE8921_UNSTIM_0H_VS_TLR1_2_STIM_MONOCYTE_12H_DN	Tubb2b:Sh3bgrl2	down	2	1	0.00519776	0.023689
GSE3039_CD4_TCELL_VS_NKT_CELL_UP	Lef1:B4galnt1	down	2	1	0.00512595	0.023689
GSE3039_NKT_CELL_VS_ALPHABETA_CD8_TCELL_DN	Tubb2b:Ephx1	down	2	1	0.00519776	0.023689
GSE3039_NKT_CELL_VS_B2_BCELL_UP	Prg4:Pou2af1	down	2	1	0.00519776	0.023689
GSE3039_ALPHAALPHA_CD8_TCELL_VS_B2_BCELL_DN	Bcl2l11:Gpr34	down	2	1	0.00519776	0.023689
GSE3039_B2_VS_B1_BCELL_UP	Tubb2b:Prg4	down	2	1	0.00519776	0.023689
GSE3039_ALPHAALPHA_VS_ALPHABETA_CD8_TCELL_DN	Gpr174:Ctsw	down	2	1	0.00519776	0.023689
GSE4748_CTRL_VS_CYANOBACTERIUM_LPSLIKE_STIM_DC_1H_UP	Bcl2l11:B4galnt1	down	2	1	0.00519776	0.023689
GSE4984_UNTREATED_VS_LPS_TREATED_DC_UP	Sh3bgrl2:Cpm	down	2	1	0.00381483	0.023689
GSE4984_LPS_VS_VEHICLE_CTRL_TREATED_DC_UP	Tcf7:Sell	down	2	1	0.00512595	0.023689
GSE5542_UNTREATED_VS_IFNA_TREATED_EPITHELIAL_CELLS_24H_DN	Dck:Dgka	down	2	1	0.00505474	0.023689
GSE5679_PPARG_LIGAND_ROSIGLITAZONE_VS_ROSIGLITAZONE_AND_RARA_AGONIST_AM580_TREATED_DC_UP	Pou2af1:Bcl6	down	2	1	0.00519776	0.023689
GSE4535_BM_DERIVED_DC_VS_FOLLICULAR_DC_UP	Pou2af1:Bcl6	down	2	1	0.00519776	0.023689
GSE5455_HEALTHY_VS_TUMOR_BEARING_MOUSE_SPLEEN_MONOCYTE_24H_INCUBATION_UP	Tubb2b:Tubb2a	down	2	1	0.00512595	0.023689
GSE5099_DAY3_VS_DAY7_MCSF_TREATED_MACROPHAGE_DN	Lef1:Tcf7	down	2	1	0.00399655	0.023689
GSE5099_CLASSICAL_M1_VS_ALTERNATIVE_M2_MACROPHAGE_UP	S1pr1:Cd27	down	2	1	0.00477594	0.023689
GSE5589_UNSTIM_VS_45MIN_LPS_AND_IL6_STIM_MACROPHAGE_UP	Stmn1:Sesn1	down	2	1	0.00519776	0.023689
GSE5589_LPS_AND_IL10_VS_LPS_AND_IL6_STIM_IL6_KO_MACROPHAGE_45MIN_UP	Evi2b:Dck	down	2	1	0.00519776	0.023689
GSE5589_LPS_VS_LPS_AND_IL10_STIM_IL10_KO_MACROPHAGE_180MIN_DN	Acsbg1:Sell	down	2	1	0.00519776	0.023689
GSE5589_WT_VS_IL6_KO_LPS_AND_IL10_STIM_MACROPHAGE_45MIN_DN	Tmem158:Bcl6	down	2	1	0.00512595	0.023689
GSE5589_WT_VS_IL10_KO_LPS_STIM_MACROPHAGE_45MIN_UP	Evi2b:S1pr1	down	2	1	0.00519776	0.023689
GSE5589_WT_VS_IL10_KO_LPS_STIM_MACROPHAGE_45MIN_DN	Prg4:Tmem158	down	2	1	0.00512595	0.023689
GSE5589_WT_VS_IL10_KO_LPS_AND_IL10_STIM_MACROPHAGE_45MIN_UP	Tubb2b:Ugcg	down	2	1	0.00512595	0.023689
GSE5589_WT_VS_IL10_KO_LPS_AND_IL6_STIM_MACROPHAGE_45MIN_DN	Nsg2:Lmo4	down	2	1	0.00519776	0.023689
GSE5589_IL6_KO_VS_IL10_KO_LPS_AND_IL10_STIM_MACROPHAGE_45MIN_DN	Sh3bgrl2:Prg4	down	2	1	0.00512595	0.023689
GSE5589_WT_VS_IL10_KO_LPS_STIM_MACROPHAGE_180MIN_DN	Ephx1:Stmn1	down	2	1	0.00346683	0.023689
GSE5589_WT_VS_IL6_KO_LPS_AND_IL10_STIM_MACROPHAGE_180MIN_DN	S1pr1:Cpm	down	2	1	0.00308642	0.023689
GSE3920_UNTREATED_VS_IFNB_TREATED_ENDOTHELIAL_CELL_UP	Stmn1:Dck	down	2	1	0.00519776	0.023689
GSE3920_UNTREATED_VS_IFNG_TREATED_FIBROBLAST_UP	Lmo4:Ugcg	down	2	1	0.00418347	0.023689
GSE3920_UNTREATED_VS_IFNG_TREATED_FIBROBLAST_DN	Cpm:Acsbg1	down	2	1	0.00444088	0.023689
GSE6092_B_BURGDOFERI_VS_B_BURGDORFERI_AND_IFNG_STIM_ENDOTHELIAL_CELL_DN	Ikzf1:Lmo4	down	2	1	0.00457312	0.023689
GSE6092_IFNG_VS_IFNG_AND_B_BURGDORFERI_INF_ENDOTHELIAL_CELL_UP	S1pr1:Sesn1	down	2	1	0.00512595	0.023689
GSE6259_33D1_POS_VS_DEC205_POS_SPLENIC_DC_DN	Tubb2a:Tubb2b	down	2	1	0.00498414	0.023689
GSE6259_BCELL_VS_CD8_TCELL_UP	Tubb2a:Tubb2b	down	2	1	0.00457312	0.023689
GSE6259_CD4_TCELL_VS_CD8_TCELL_UP	Tubb2a:Ephx1	down	2	1	0.00477594	0.023689
GSE6259_33D1_POS_DC_VS_CD8_TCELL_UP	Pou2af1:Lef1	down	2	1	0.00288118	0.023689
GSE6259_33D1_POS_DC_VS_CD8_TCELL_DN	Neurl3:Itm2a	down	2	1	0.00263681	0.023689
GSE6259_FLT3L_INDUCED_DEC205_POS_DC_VS_BCELL_DN	Itm2a:Ikzf1	down	2	1	0.00437565	0.023689
GSE6259_DEC205_POS_DC_VS_CD8_TCELL_UP	Cpm:Neurl3	down	2	1	0.00457312	0.023689
GSE3203_HEALTHY_VS_INFLUENZA_INFECTED_LN_BCELL_UP	Ephx1:Cpm	down	2	1	0.00519776	0.023689
GSE6875_TCONV_VS_FOXP3_KO_TREG_UP	Cpm:Bcl6	down	2	1	0.00512595	0.023689
GSE7218_UNSTIM_VS_ANTIGEN_STIM_THROUGH_IGG_BCELL_UP	Ephx1:Tcf7	down	2	1	0.00498414	0.023689
GSE7509_UNSTIM_VS_IFNA_STIM_IMMATURE_DC_DN	Lmo4:Dgka	down	2	1	0.00437565	0.023689
GSE7509_DC_VS_MONOCYTE_UP	Tubb2a:Sesn1	down	2	1	0.00519776	0.023689
GSE7548_NAIVE_VS_DAY28_PCC_IMMUNIZATION_CD4_TCELL_UP	Bcl2l11:Dgka	down	2	1	0.00512595	0.023689
GSE7548_DAY7_VS_DAY28_PCC_IMMUNIZATION_CD4_TCELL_UP	S1pr1:Bcl6	down	2	1	0.00519776	0.023689
GSE7768_OVA_WITH_LPS_VS_OVA_WITH_MPL_IMMUNIZED_MOUSE_WHOLE_SPLEEN_6H_DN	Lmo4:Sell	down	2	1	0.00418347	0.023689
GSE9601_UNTREATED_VS_NFKB_INHIBITOR_TREATED_HCMV_INF_MONOCYTE_UP	Tubb2b:Tubb2a	down	2	1	0.00363827	0.023689
GSE9601_UNTREATED_VS_NFKB_INHIBITOR_TREATED_HCMV_INF_MONOCYTE_DN	Itm2a:Ikzf1	down	2	1	0.004311	0.023689
GSE9601_UNTREATED_VS_PI3K_INHIBITOR_TREATED_HCMV_INF_MONOCYTE_UP	Acsbg1:Tmem158	down	2	1	0.00412058	0.023689
GSE9316_IL6_KO_VS_IFNG_KO_INVIVO_EXPANDED_CD4_TCELL_UP	Pou2af1:Stmn1	down	2	1	0.00519776	0.023689
GSE9509_LPS_VS_LPS_AND_IL10_STIM_IL10_KO_MACROPHAGE_10MIN_UP	Pou2af1:Bcl2l11	down	2	1	0.00512595	0.023689
GSE6674_UNSTIM_VS_ANTI_IGM_AND_CPG_STIM_BCELL_UP	Bcl2l11:Bcl6	down	2	1	0.00519776	0.023689
GSE6674_CPG_VS_PL2_3_STIM_BCELL_UP	Cd27:Tcf7	down	2	1	0.00519776	0.023689
GSE7831_UNSTIM_VS_CPG_STIM_PDC_1H_DN	Tmem158:Cpm	down	2	1	0.00519776	0.023689
GSE8621_LPS_STIM_VS_LPS_PRIMED_AND_LPS_STIM_MACROPHAGE_UP	Tcf7:Dapl1	down	2	1	0.00519776	0.023689
GSE10240_CTRL_VS_IL22_STIM_PRIMARY_BRONCHIAL_EPITHELIAL_CELLS_UP	Bcl2l11:Cd27	down	2	1	0.00519776	0.023689
GSE10273_LOW_IL7_VS_HIGH_IL7_AND_IRF4_IN_IRF4_8_NULL_PRE_BCELL_UP	Pou2af1:Stmn1	down	2	1	0.00519776	0.023689
GSE10273_HIGH_VS_LOW_IL7_TREATED_IRF4_8_NULL_PRE_BCELL_DN	Evi2b:Dapl1	down	2	1	0.00512595	0.023689
GSE8685_IL15_ACT_IL2_STARVED_VS_IL21_ACT_IL2_STARVED_CD4_TCELL_UP	Cd27:Sh3bgrl2	down	2	1	0.00399655	0.023689
GSE10147_IL3_VS_IL3_AND_HIVP17_STIM_PDC_DN	Stmn1:Nsg2	down	2	1	0.00293167	0.023689
GSE10147_IL3_AND_HIVP17_VS_IL3_AND_CPG_STIM_PDC_DN	Neurl3:St8sia6	down	2	1	0.00381483	0.023689
GSE10500_ARTHRITIC_SYNOVIAL_FLUID_VS_HEALTHY_MACROPHAGE_UP	Cpm:Stmn1	down	2	1	0.00324612	0.023689
GSE11386_NAIVE_VS_MEMORY_BCELL_DN	Lef1:Tcf7	down	2	1	0.00363827	0.023689
GSE7219_WT_VS_NIK_NFKB2_KO_DC_UP	Gpr34:Gpr171	down	2	1	0.00457312	0.023689
GSE7219_WT_VS_NIK_NFKB2_KO_LPS_AND_ANTI_CD40_STIM_DC_UP	Stmn1:Tmem158	down	2	1	0.00519776	0.023689
GSE11884_WT_VS_FURIN_KO_NAIVE_CD4_TCELL_UP	Tcf7:Dapl1	down	2	1	0.00303429	0.023689
GSE9946_IMMATURE_VS_PROSTAGLANDINE2_TREATED_MATURE_DC_UP	Tcf7:Lef1	down	2	1	0.00352342	0.023689
GSE13522_WT_VS_IFNAR_KO_SKING_T_CRUZI_Y_STRAIN_INF_DN	Dapl1:Itm2a	down	2	1	0.00512595	0.023689
GSE13522_CTRL_VS_T_CRUZI_BRAZIL_STRAIN_INF_SKIN_DN	Bcl6:Pou2af1	down	2	1	0.00512595	0.023689
GSE13522_WT_VS_IFNAR_KO_SKIN_UP	Cpm:Dapl1	down	2	1	0.00519776	0.023689
GSE14699_NAIVE_VS_ACT_CD8_TCELL_UP	Sh3bgrl2:Acsbg1	down	2	1	0.00512595	0.023689
GSE14415_INDUCED_TREG_VS_TCONV_UP	Stmn1:Dck	down	2	1	0.00437565	0.023689
GSE14415_ACT_VS_CTRL_NATURAL_TREG_UP	Dck:Cpm	down	2	1	0.00418347	0.023689
GSE14415_NATURAL_TREG_VS_TCONV_UP	Bcl2l11:Gpr171	down	2	1	0.00308642	0.023689
GSE13547_2H_VS_12_H_ANTI_IGM_STIM_BCELL_UP	Stmn1:Ephx1	down	2	1	0.00412058	0.023689
GSE13547_2H_VS_12_H_ANTI_IGM_STIM_BCELL_DN	Stmn1:Dck	down	2	1	0.00464013	0.023689
GSE13547_WT_VS_ZFX_KO_BCELL_ANTI_IGM_STIM_12H_DN	Neurl3:Tcf7	down	2	1	0.00363827	0.023689
GSE13547_CTRL_VS_ANTI_IGM_STIM_BCELL_2H_DN	Lef1:Tcf7	down	2	1	0.00369656	0.023689
GSE13547_CTRL_VS_ANTI_IGM_STIM_BCELL_2H_UP	Ephx1:Stmn1	down	2	1	0.00450671	0.023689
GSE13547_2H_VS_12_H_ANTI_IGM_STIM_ZFX_KO_BCELL_DN	Dck:Lef1	down	2	1	0.00405827	0.023689
GSE13547_WT_VS_ZFX_KO_BCELL_UP	Ephx1:Itm2a	down	2	1	0.00381483	0.023689
GSE13547_CTRL_VS_ANTI_IGM_STIM_ZFX_KO_BCELL_2H_UP	Stmn1:Ephx1	down	2	1	0.00358056	0.023689
GSE15330_LYMPHOID_MULTIPOTENT_VS_PRO_BCELL_UP	Evi2b:Itm2a	down	2	1	0.00519776	0.023689
GSE15330_HSC_VS_GRANULOCYTE_MONOCYTE_PROGENITOR_IKAROS_KO_UP	Ctsw:Bcl6	down	2	1	0.00519776	0.023689
GSE15330_MEGAKARYOCYTE_ERYTHROID_PROGENITOR_VS_PRO_BCELL_UP	Acsbg1:S1pr1	down	2	1	0.00512595	0.023689
GSE12198_CTRL_VS_LOW_IL2_STIM_NK_CELL_DN	Acsbg1:Tmem158	down	2	1	0.00512595	0.023689
GSE15624_3H_VS_6H_HALOFUGINONE_TREATED_CD4_TCELL_UP	Cpm:Tcf7	down	2	1	0.00418347	0.023689
GSE9960_HEALTHY_VS_GRAM_POS_SEPSIS_PBMC_DN	Tcf7:Neurl3	down	2	1	0.00470774	0.023689
GSE12392_IFNAR_KO_VS_IFNB_KO_CD8_NEG_SPLEEN_DC_DN	Bcl2l11:Ugcg	down	2	1	0.00519776	0.023689
GSE12392_WT_VS_IFNB_KO_CD8A_POS_SPLEEN_DC_DN	Tmem158:Ugcg	down	2	1	0.00519776	0.023689
GSE12392_WT_VS_IFNB_KO_CD8A_NEG_SPLEEN_DC_DN	B4galnt1:Sesn1	down	2	1	0.00519776	0.023689
GSE15735_CTRL_VS_HDAC_INHIBITOR_TREATED_CD4_TCELL_2H_UP	Tubb2b:Bcl6	down	2	1	0.00519776	0.023689
GSE15735_CTRL_VS_HDAC_INHIBITOR_TREATED_CD4_TCELL_2H_DN	Ctsw:B4galnt1	down	2	1	0.00519776	0.023689
GSE17812_WT_VS_THPOK_KO_MEMORY_CD8_TCELL_UP	Sell:Cpm	down	2	1	0.00512595	0.023689
GSE17186_MEMORY_VS_CD21LOW_TRANSITIONAL_BCELL_DN	B4galnt1:Sell	down	2	1	0.00519776	0.023689
GSE17186_BLOOD_VS_CORD_BLOOD_CD21HIGH_TRANSITIONAL_BCELL_UP	Tubb2a:Evi2b	down	2	1	0.00519776	0.023689
GSE17186_BLOOD_VS_CORD_BLOOD_CD21HIGH_TRANSITIONAL_BCELL_DN	Sell:Itm2a	down	2	1	0.00512595	0.023689
GSE17186_NAIVE_VS_CD21LOW_TRANSITIONAL_BCELL_DN	Sesn1:Acsbg1	down	2	1	0.00519776	0.023689
GSE16266_LPS_VS_HEATSHOCK_AND_LPS_STIM_MEF_UP	Pou2af1:Evi2b	down	2	1	0.00512595	0.023689
GSE16266_CTRL_VS_LPS_STIM_MEF_DN	Sell:Sesn1	down	2	1	0.00519776	0.023689
GSE19198_1H_VS_24H_IL21_TREATED_TCELL_UP	Dgka:Evi2b	down	2	1	0.00519776	0.023689
GSE18281_SUBCAPSULAR_VS_CENTRAL_CORTICAL_REGION_OF_THYMUS_UP	Neurl3:Stmn1	down	2	1	0.00464013	0.023689
GSE18281_MEDULLARY_THYMOCYTE_VS_WHOLE_MEDULLA_THYMUS_DN	Stmn1:Neurl3	down	2	1	0.00505474	0.023689
GSE18281_PERIMEDULLARY_CORTICAL_REGION_VS_WHOLE_MEDULLA_THYMUS_UP	Ephx1:Nsg2	down	2	1	0.00512595	0.023689
GSE19923_WT_VS_E2A_KO_DP_THYMOCYTE_UP	Sesn1:S1pr1	down	2	1	0.00519776	0.023689
GSE19772_CTRL_VS_HCMV_INF_MONOCYTES_UP	Bcl2l11:Bcl6	down	2	1	0.00519776	0.023689
GSE18893_TCONV_VS_TREG_24H_CULTURE_DN	Bcl6:Cpm	down	2	1	0.00519776	0.023689
GSE18893_TCONV_VS_TREG_2H_TNF_STIM_DN	Bcl6:Cd27	down	2	1	0.00477594	0.023689
GSE19888_CTRL_VS_A3R_ACTIVATION_MAST_CELL_DN	Nsg2:S1pr1	down	2	1	0.00519776	0.023689
GSE19888_ADENOSINE_A3R_INH_PRETREAT_AND_ACT_BY_A3R_VS_A3R_INH_AND_TCELL_MEMBRANES_ACT_MAST_CELL_DN	Gpr174:S1pr1	down	2	1	0.00519776	0.023689
GSE20198_UNTREATED_VS_IL12_TREATED_ACT_CD4_TCELL_DN	Dck:Ugcg	down	2	1	0.00505474	0.023689
GSE16450_CTRL_VS_IFNA_6H_STIM_IMMATURE_NEURON_CELL_LINE_DN	Evi2b:Sesn1	down	2	1	0.00477594	0.023689
GSE16451_IMMATURE_VS_MATURE_NEURON_CELL_LINE_WEST_EQUINE_ENC_VIRUS_UP	Tubb2b:Tubb2a	down	2	1	0.00519776	0.023689
GSE16450_CTRL_VS_IFNA_6H_STIM_IMMATURE_NEURON_CELL_LINE_UP	Gpr171:Bcl6	down	2	1	0.00519776	0.023689
GSE21670_UNTREATED_VS_TGFB_IL6_TREATED_STAT3_KO_CD4_TCELL_UP	Gpr171:Stmn1	down	2	1	0.00519776	0.023689
GSE21670_TGFB_VS_IL6_TREATED_STAT3_KO_CD4_TCELL_DN	Nsg2:Evi2b	down	2	1	0.00519776	0.023689
GSE21670_TGFB_VS_TGFB_AND_IL6_TREATED_CD4_TCELL_DN	Dapl1:Lef1	down	2	1	0.00512595	0.023689
GSE21670_TGFB_VS_IL6_TREATED_STAT3_KO_CD4_TCELL_UP	Ctsw:Ephx1	down	2	1	0.00519776	0.023689
GSE21670_IL6_VS_TGFB_AND_IL6_TREATED_STAT3_KO_CD4_TCELL_DN	Itm2a:Gpr34	down	2	1	0.00512595	0.023689
GSE21670_STAT3_KO_VS_WT_CD4_TCELL_TGFB_IL6_TREATED_DN	Cd27:Ephx1	down	2	1	0.00519776	0.023689
GSE21670_STAT3_KO_VS_WT_CD4_TCELL_DN	Bcl6:Ikzf1	down	2	1	0.00512595	0.023689
GSE21670_UNTREATED_VS_IL6_TREATED_STAT3_KO_CD4_TCELL_UP	Cd27:Evi2b	down	2	1	0.00519776	0.023689
GSE21670_UNTREATED_VS_IL6_TREATED_STAT3_KO_CD4_TCELL_DN	Ikzf1:Bcl6	down	2	1	0.00498414	0.023689
GSE21670_UNTREATED_VS_TGFB_TREATED_CD4_TCELL_UP	Gpr174:Ikzf1	down	2	1	0.00519776	0.023689
GSE22229_RENAL_TRANSPLANT_IMMUNOSUPP_THERAPY_VS_HEALTHY_PBMC_UP	Lmo4:B4galnt1	down	2	1	0.00512595	0.023689
GSE21774_CD62L_POS_CD56_BRIGHT_VS_CD62L_NEG_CD56_DIM_NK_CELL_UP	Sell:B4galnt1	down	2	1	0.00519776	0.023689
GSE21774_CD62L_POS_CD56_DIM_VS_CD62L_NEG_CD56_DIM_NK_CELL_DN	Sell:B4galnt1	down	2	1	0.00512595	0.023689
GSE21379_WT_VS_SAP_KO_TFH_CD4_TCELL_DN	Sell:Ikzf1	down	2	1	0.00505474	0.023689
GSE21379_TFH_VS_NON_TFH_CD4_TCELL_UP	Ikzf1:Gpr174	down	2	1	0.00512595	0.023689
GSE21380_NON_TFH_VS_TFH_CD4_TCELL_UP	Stmn1:Sesn1	down	2	1	0.00519776	0.023689
GSE21546_SAP1A_KO_VS_SAP1A_KO_AND_ELK1_KO_ANTI_CD3_STIM_DP_THYMOCYTES_DN	B4galnt1:Bcl6	down	2	1	0.00519776	0.023689
GSE21927_SPLEEN_VS_C26GM_TUMOR_MONOCYTE_BALBC_UP	Gpr174:Gpr34	down	2	1	0.00399655	0.023689
GSE21360_NAIVE_VS_PRIMARY_MEMORY_CD8_TCELL_DN	S1pr1:Dck	down	2	1	0.00491414	0.023689
GSE21360_NAIVE_VS_SECONDARY_MEMORY_CD8_TCELL_UP	Pou2af1:Lmo4	down	2	1	0.00450671	0.023689
GSE22140_GERMFREE_VS_SPF_MOUSE_CD4_TCELL_DN	Tubb2a:Dgka	down	2	1	0.00519776	0.023689
GSE19401_NAIVE_VS_IMMUNIZED_MOUSE_PLN_FOLLICULAR_DC_UP	Itm2a:Tubb2a	down	2	1	0.00512595	0.023689
GSE19401_UNSTIM_VS_RETINOIC_ACID_STIM_FOLLICULAR_DC_DN	Itm2a:Sell	down	2	1	0.00484474	0.023689
GSE19401_UNSTIM_VS_RETINOIC_ACID_AND_PAM2CSK4_STIM_FOLLICULAR_DC_UP	Bcl2l11:Tubb2a	down	2	1	0.00519776	0.023689
GSE19401_PLN_VS_PEYERS_PATCH_FOLLICULAR_DC_DN	Lmo4:Ugcg	down	2	1	0.00512595	0.023689
GSE19401_UNSTIM_VS_PAM2CSK4_STIM_FOLLICULAR_DC_DN	Tubb2a:Cpm	down	2	1	0.00519776	0.023689
GSE19401_RETINOIC_ACID_VS_RETINOIC_ACID_AND_PAM2CSK4_STIM_FOLLICULAR_DC_DN	Ikzf1:Stmn1	down	2	1	0.00505474	0.023689
GSE19401_RETINOIC_ACID_VS_RETINOIC_ACID_AND_PAM2CSK4_STIM_FOLLICULAR_DC_UP	Bcl2l11:Gpr171	down	2	1	0.00477594	0.023689
GSE20152_SPHK1_KO_VS_HTNFA_OVEREXPRESS_ANKLE_UP	Tcf7:Gpr171	down	2	1	0.00484474	0.023689
GSE20152_HTNFA_OVERXPRESS_ANKLE_VS_CTRL_SPHK1_KO_ANKLE_UP	Ugcg:Pou2af1	down	2	1	0.00491414	0.023689
GSE22033_UNTREATED_VS_MRL24_TREATED_MEF_UP	Ikzf1:Acsbg1	down	2	1	0.00519776	0.023689
GSE22033_UNTREATED_VS_ROSIGLITAZONE_TREATED_MEF_DN	Cpm:Bcl2l11	down	2	1	0.00498414	0.023689
GSE22527_ANTI_CD3_INVIVO_VS_UNTREATED_MOUSE_TREG_DN	Ikzf1:Sesn1	down	2	1	0.00519776	0.023689
GSE21033_1H_VS_12H_POLYIC_STIM_DC_UP	Tubb2b:Dck	down	2	1	0.00450671	0.023689
GSE21033_CTRL_VS_POLYIC_STIM_DC_24H_UP	Cpm:Sell	down	2	1	0.00358056	0.023689
GSE23308_CTRL_VS_CORTICOSTERONE_TREATED_MACROPHAGE_MINERALCORTICOID_REC_KO_UP	Tubb2a:S1pr1	down	2	1	0.00519776	0.023689
GSE22935_WT_VS_MYD88_KO_MACROPHAGE_12H_MBOVIS_BCG_STIM_UP	S1pr1:Cd27	down	2	1	0.00519776	0.023689
GSE20754_WT_VS_TCF1_KO_MEMORY_CD8_TCELL_DN	Gpr34:Gpr171	down	2	1	0.00519776	0.023689
GSE23695_CD57_POS_VS_NEG_NK_CELL_DN	Stmn1:Lef1	down	2	1	0.00519776	0.023689
GSE22103_UNSTIM_VS_LPS_STIM_NEUTROPHIL_DN	Bcl2l11:Stmn1	down	2	1	0.00519776	0.023689
GSE22103_LPS_VS_GMCSF_AND_IFNG_STIM_NEUTROPHIL_UP	Stmn1:Lmo4	down	2	1	0.00519776	0.023689
GSE22432_CONVENTIONAL_CDC_VS_PLASMACYTOID_PDC_DN	Ctsw:Prg4	down	2	1	0.00519776	0.023689
GSE22432_CDC_VS_COMMON_DC_PROGENITOR_UP	Pou2af1:S1pr1	down	2	1	0.00519776	0.023689
GSE22432_PDC_VS_TGFB1_TREATEDCOMMON_DC_PROGENITOR_DN	Ctsw:Cpm	down	2	1	0.00519776	0.023689
GSE24210_RESTING_TREG_VS_TCONV_UP	Evi2b:Sesn1	down	2	1	0.00519776	0.023689
GSE23505_IL6_IL1_VS_IL6_IL1_IL23_TREATED_CD4_TCELL_DN	S1pr1:Pou2af1	down	2	1	0.00519776	0.023689
GSE23925_LIGHT_ZONE_VS_NAIVE_BCELL_DN	Lef1:Tubb2a	down	2	1	0.00519776	0.023689
GSE16385_MONOCYTE_VS_12H_IL4_TREATED_MACROPHAGE_UP	Cpm:Ikzf1	down	2	1	0.00512595	0.023689
GSE25123_CTRL_VS_IL4_STIM_MACROPHAGE_DN	Cd27:Gpr34	down	2	1	0.00498414	0.023689
GSE25088_CTRL_VS_IL4_AND_ROSIGLITAZONE_STIM_MACROPHAGE_UP	Tcf7:Sell	down	2	1	0.00470774	0.023689
GSE25088_CTRL_VS_IL4_STIM_STAT6_KO_MACROPHAGE_UP	Gpr34:Tubb2a	down	2	1	0.00477594	0.023689
GSE25123_WT_VS_PPARG_KO_MACROPHAGE_ROSIGLITAZONE_STIM_DN	Itm2a:Evi2b	down	2	1	0.00405827	0.023689
GSE25123_WT_VS_PPARG_KO_MACROPHAGE_UP	Bcl6:Neurl3	down	2	1	0.00505474	0.023689
GSE16385_UNTREATED_VS_12H_IL4_TREATED_MACROPHAGE_DN	Gpr171:Prg4	down	2	1	0.00505474	0.023689
GSE25123_IL4_VS_IL4_AND_ROSIGLITAZONE_STIM_PPARG_KO_MACROPHAGE_DAY10_DN	Evi2b:Sell	down	2	1	0.00477594	0.023689
GSE17301_ACD3_ACD28_VS_ACD3_ACD28_AND_IFNA2_STIM_CD8_TCELL_UP	Acsbg1:Stmn1	down	2	1	0.00512595	0.023689
GSE17301_CTRL_VS_48H_ACD3_ACD28_STIM_CD8_TCELL_UP	Bcl6:Tubb2a	down	2	1	0.00512595	0.023689
GSE17301_CTRL_VS_48H_ACD3_ACD28_IFNA5_STIM_CD8_TCELL_UP	Evi2b:Sesn1	down	2	1	0.00519776	0.023689
GSE22282_HYPOXIA_VS_NORMOXIA_MYELOID_DC_DN	Dapl1:S1pr1	down	2	1	0.00519776	0.023689
GSE25085_FETAL_LIVER_VS_FETAL_BM_SP4_THYMIC_IMPLANT_UP	Evi2b:Sesn1	down	2	1	0.00519776	0.023689
GSE23502_BM_VS_COLON_TUMOR_HDC_KO_MYELOID_DERIVED_SUPPRESSOR_CELL_DN	Gpr171:B4galnt1	down	2	1	0.00519776	0.023689
GSE23502_WT_VS_HDC_KO_MYELOID_DERIVED_SUPPRESSOR_CELL_BM_DN	Pou2af1:Tubb2a	down	2	1	0.00519776	0.023689
GSE24972_MARGINAL_ZONE_BCELL_VS_FOLLICULAR_BCELL_DN	St8sia6:Sesn1	down	2	1	0.00519776	0.023689
GSE19941_UNSTIM_VS_LPS_AND_IL10_STIM_IL10_KO_MACROPHAGE_DN	Dck:Itm2a	down	2	1	0.00512595	0.023689
GSE19941_IL10_KO_VS_IL10_KO_AND_NFKBP50_KO_LPS_AND_IL10_STIM_MACROPHAGE_UP	Acsbg1:Lmo4	down	2	1	0.00512595	0.023689
GSE19941_LPS_VS_LPS_AND_IL10_STIM_IL10_KO_NFKBP50_KO_MACROPHAGE_UP	Ctsw:Acsbg1	down	2	1	0.00505474	0.023689
GSE25147_UNSTIM_VS_HELIOBACTER_PYLORI_LPS_STIM_MKN45_CELL_DN	B4galnt1:Lef1	down	2	1	0.00387483	0.023689
GSE25147_UNSTIM_VS_HELIOBACTER_PYLORI_LPS_STIM_MKN45_CELL_UP	Tmem158:Lef1	down	2	1	0.00412058	0.023689
GSE22342_CD11C_HIGH_VS_LOW_DECIDUAL_MACROPHAGES_UP	Gpr174:Ikzf1	down	2	1	0.00491414	0.023689
GSE26023_PHD3_KO_VS_WT_NEUTROPHIL_HYPOXIA_DN	Ctsw:Gpr171	down	2	1	0.00491414	0.023689
GSE22611_UNSTIM_VS_2H_MDP_STIM_NOD2_TRANSDUCED_HEK293T_CELL_UP	Stmn1:Lef1	down	2	1	0.00484474	0.023689
GSE22611_UNSTIM_VS_2H_MDP_STIM_NOD2_TRANSDUCED_HEK293T_CELL_DN	Nsg2:Ikzf1	down	2	1	0.00498414	0.023689
GSE22611_MUTANT_NOD2_TRANSDUCED_VS_CTRL_HEK293T_STIMULATED_WITH_MDP_6H_UP	Ctsw:Gpr171	down	2	1	0.00484474	0.023689
GSE22611_NOD2_VS_CTRL_TRANSDUCED_HEK293T_CELL_DN	Lmo4:Sell	down	2	1	0.00512595	0.023689
GSE25677_R848_VS_MPL_AND_R848_STIM_BCELL_DN	Sesn1:Ephx1	down	2	1	0.00399655	0.023689
GSE25677_MPL_VS_MPL_AND_R848_STIM_BCELL_UP	Bcl6:Gpr174	down	2	1	0.00346683	0.023689
GSE25677_MPL_VS_R848_STIM_BCELL_UP	S1pr1:Ikzf1	down	2	1	0.004311	0.023689
GSE26488_WT_VS_HDAC7_DELTAP_TG_OT2_THYMOCYTE_WITH_PEPTIDE_INJECTION_UP	B4galnt1:S1pr1	down	2	1	0.00519776	0.023689
GSE22443_IL2_VS_IL12_TREATED_ACT_CD8_TCELL_DN	Sell:Bcl2l11	down	2	1	0.00519776	0.023689
GSE22443_NAIVE_VS_ACT_AND_IL12_TREATED_CD8_TCELL_UP	Lmo4:Ikzf1	down	2	1	0.00519776	0.023689
GSE27241_WT_VS_RORGT_KO_TH17_POLARIZED_CD4_TCELL_TREATED_WITH_DIGOXIN_DN	Bcl2l11:Nsg2	down	2	1	0.00457312	0.023689
GSE27241_WT_CTRL_VS_DIGOXIN_TREATED_RORGT_KO_CD4_TCELL_IN_TH17_POLARIZING_CONDITIONS_DN	Sesn1:Ephx1	down	2	1	0.00450671	0.023689
GSE27241_WT_VS_RORGT_KO_TH17_POLARIZED_CD4_TCELL_DN	Tubb2a:Tubb2b	down	2	1	0.004311	0.023689
GSE21063_CTRL_VS_ANTI_IGM_STIM_BCELL_8H_UP	Itm2a:Gpr174	down	2	1	0.00381483	0.023689
GSE21063_CTRL_VS_ANTI_IGM_STIM_BCELL_3H_UP	Lef1:Tcf7	down	2	1	0.00444088	0.023689
GSE21063_3H_VS_16H_ANTI_IGM_STIM_NFATC1_KOBCELL_UP	Pou2af1:Bcl6	down	2	1	0.00512595	0.023689
GSE21063_CTRL_VS_ANTI_IGM_STIM_BCELL_NFATC1_KO_16H_UP	Bcl2l11:Ephx1	down	2	1	0.00519776	0.023689
GSE21063_WT_VS_NFATC1_KO_BCELL_UP	Bcl2l11:Ctsw	down	2	1	0.00519776	0.023689
GSE21063_CTRL_VS_ANTI_IGM_STIM_BCELL_16H_DN	Acsbg1:Ephx1	down	2	1	0.00519776	0.023689
GSE23114_WT_VS_SLE2C1_MOUSE_SPLEEN_B1A_BCELL_DN	Dgka:Ctsw	down	2	1	0.00512595	0.023689
GSE23114_WT_VS_SLE2C1_MOUSE_SPLEEN_B1A_BCELL_UP	S1pr1:Tubb2a	down	2	1	0.00512595	0.023689
GSE23114_PERITONEAL_CAVITY_B1A_BCELL_VS_SPLEEN_BCELL_IN_SLE2C1_MOUSE_UP	Dgka:Ctsw	down	2	1	0.00512595	0.023689
GSE26156_DOUBLE_POSITIVE_VS_CD4_SINGLE_POSITIVE_THYMOCYTE_UP	Tcf7:Ctsw	down	2	1	0.00512595	0.023689
GSE28726_NAIVE_CD4_TCELL_VS_NAIVE_VA24NEG_NKTCELL_DN	Dgka:Tubb2a	down	2	1	0.00505474	0.023689
GSE24574_BCL6_HIGH_TFH_VS_NAIVE_CD4_TCELL_UP	Prg4:Ctsw	down	2	1	0.00505474	0.023689
GSE24574_BCL6_LOW_TFH_VS_TCONV_CD4_TCELL_UP	Dck:Tmem158	down	2	1	0.00470774	0.023689
GSE22025_TGFB1_VS_TGFB1_AND_PROGESTERONE_TREATED_CD4_TCELL_UP	Pou2af1:Cd27	down	2	1	0.00505474	0.023689
GSE22025_UNTREATED_VS_PROGESTERONE_TREATED_CD4_TCELL_DN	S1pr1:Sell	down	2	1	0.00519776	0.023689
GSE22025_UNTREATED_VS_TGFB1_TREATED_CD4_TCELL_DN	Pou2af1:Cd27	down	2	1	0.00505474	0.023689
GSE29949_MICROGLIA_BRAIN_VS_CD8_POS_DC_SPLEEN_UP	Cd27:Bcl6	down	2	1	0.00512595	0.023689
GSE29949_MICROGLIA_VS_DC_BRAIN_DN	Bcl6:Lmo4	down	2	1	0.00512595	0.023689
GSE30153_LUPUS_VS_HEALTHY_DONOR_BCELL_UP	S1pr1:Evi2b	down	2	1	0.00512595	0.023689
GSE24814_STAT5_KO_VS_WT_PRE_BCELL_UP	Gpr171:B4galnt1	down	2	1	0.00491414	0.023689
GSE23321_CENTRAL_VS_EFFECTOR_MEMORY_CD8_TCELL_DN	Bcl2l11:Lmo4	down	2	1	0.00519776	0.023689
GSE23321_CENTRAL_MEMORY_VS_NAIVE_CD8_TCELL_UP	Sell:Evi2b	down	2	1	0.00512595	0.023689
GSE32533_MIR17_KO_VS_MIR17_OVEREXPRESS_ACT_CD4_TCELL_UP	Ikzf1:Evi2b	down	2	1	0.00519776	0.023689
GSE29164_UNTREATED_VS_CD8_TCELL_TREATED_MELANOMA_DAY3_DN	Sesn1:B4galnt1	down	2	1	0.00519776	0.023689
GSE23568_CTRL_VS_ID3_TRANSDUCED_CD8_TCELL_DN	Stmn1:Ctsw	down	2	1	0.00519776	0.023689
GSE23568_CTRL_VS_ID3_TRANSDUCED_CD8_TCELL_UP	Sell:Dgka	down	2	1	0.00519776	0.023689
GSE33424_CD161_HIGH_VS_INT_CD8_TCELL_UP	Sell:Pou2af1	down	2	1	0.00519776	0.023689
GSE33425_CD161_HIGH_VS_NEG_CD8_TCELL_DN	Sh3bgrl2:Tubb2a	down	2	1	0.00519776	0.023689
GSE32986_UNSTIM_VS_CURDLAN_LOWDOSE_STIM_DC_DN	Bcl6:Lmo4	down	2	1	0.00519776	0.023689
GSE32986_CURDLAN_LOWDOSE_VS_GMCSF_AND_CURDLAN_LOWDOSE_STIM_DC_DN	Dgka:Gpr171	down	2	1	0.00512595	0.023689
GSE32986_CURDLAN_LOWDOSE_VS_CURDLAN_HIGHDOSE_STIM_DC_UP	Sesn1:Bcl2l11	down	2	1	0.00519776	0.023689
GSE26343_UNSTIM_VS_LPS_STIM_MACROPHAGE_DN	Evi2b:Bcl2l11	down	2	1	0.00519776	0.023689
GSE34156_TLR1_TLR2_LIGAND_VS_NOD2_AND_TLR1_TLR2_LIGAND_24H_TREATED_MONOCYTE_DN	Bcl6:Gpr34	down	2	1	0.00519776	0.023689
GSE34156_TLR1_TLR2_LIGAND_VS_NOD2_AND_TLR1_TLR2_LIGAND_6H_TREATED_MONOCYTE_UP	Ikzf1:Tcf7	down	2	1	0.00519776	0.023689
GSE30971_WBP7_HET_VS_KO_MACROPHAGE_UP	Tmem158:Bcl6	down	2	1	0.00519776	0.023689
GSE30971_2H_VS_4H_LPS_STIM_MACROPHAGE_WBP7_KO_UP	Tcf7:Prg4	down	2	1	0.00519776	0.023689
GSE36888_UNTREATED_VS_IL2_TREATED_TCELL_17H_UP	Stmn1:Gpr34	down	2	1	0.00512595	0.023689
GSE36888_UNTREATED_VS_IL2_TREATED_TCELL_17H_DN	Tubb2a:Bcl6	down	2	1	0.00505474	0.023689
GSE36888_UNTREATED_VS_IL2_TREATED_STAT5_AB_KNOCKIN_TCELL_17H_DN	Acsbg1:S1pr1	down	2	1	0.00519776	0.023689
GSE34515_CD16_NEG_MONOCYTE_VS_DC_UP	Sesn1:Evi2b	down	2	1	0.00498414	0.023689
GSE34515_CD16_POS_MONOCYTE_VS_DC_UP	Cd27:Cpm	down	2	1	0.00519776	0.023689
GSE36009_WT_VS_NLRP10_KO_DC_LPS_STIM_DN	Evi2b:S1pr1	down	2	1	0.00519776	0.023689
GSE36891_UNSTIM_VS_POLYIC_TLR3_STIM_PERITONEAL_MACROPHAGE_DN	Ugcg:S1pr1	down	2	1	0.00519776	0.023689
GSE37605_C57BL6_VS_NOD_FOXP3_IRES_GFP_TREG_DN	Cd27:Gpr34	down	2	1	0.00512595	0.023689
GSE37301_LYMPHOID_PRIMED_MPP_VS_COMMON_LYMPHOID_PROGENITOR_DN	Lmo4:Dck	down	2	1	0.00519776	0.023689
GSE37301_LYMPHOID_PRIMED_MPP_VS_PRO_BCELL_UP	Tubb2a:Sh3bgrl2	down	2	1	0.00519776	0.023689
GSE37301_COMMON_LYMPHOID_PROGENITOR_VS_GRAN_MONO_PROGENITOR_DN	Tcf7:Evi2b	down	2	1	0.00498414	0.023689
GSE37301_HEMATOPOIETIC_STEM_CELL_VS_COMMON_LYMPHOID_PROGENITOR_DN	Ephx1:Lef1	down	2	1	0.00519776	0.023689
GSE37301_HEMATOPOIETIC_STEM_CELL_VS_PRO_BCELL_DN	Dapl1:Ephx1	down	2	1	0.0039354	0.023689
GSE37301_HEMATOPOIETIC_STEM_CELL_VS_GRAN_MONO_PROGENITOR_UP	Itm2a:Ephx1	down	2	1	0.00363827	0.023689
GSE37301_PRO_BCELL_VS_RAG2_KO_NK_CELL_DN	Acsbg1:Ctsw	down	2	1	0.00450671	0.023689
GSE37532_WT_VS_PPARG_KO_LN_TREG_UP	Cd27:Bcl6	down	2	1	0.00477594	0.023689
GSE37532_TREG_VS_TCONV_PPARG_KO_CD4_TCELL_FROM_VISCERAL_ADIPOSE_TISSUE_DN	Bcl6:Gpr171	down	2	1	0.00512595	0.023689
GSE37532_WT_VS_PPARG_KO_VISCERAL_ADIPOSE_TISSUE_TREG_UP	Stmn1:Cd27	down	2	1	0.00505474	0.023689
GSE37533_PPARG1_FOXP3_VS_FOXP3_TRANSDUCED_CD4_TCELL_PIOGLITAZONE_TREATED_DN	Bcl6:Sesn1	down	2	1	0.00512595	0.023689
GSE37534_UNTREATED_VS_GW1929_TREATED_CD4_TCELL_PPARG1_AND_FOXP3_TRASDUCED_DN	Bcl6:Cpm	down	2	1	0.00505474	0.023689
GSE37534_UNTREATED_VS_PIOGLITAZONE_TREATED_CD4_TCELL_PPARG1_AND_FOXP3_TRASDUCED_UP	Dck:S1pr1	down	2	1	0.00491414	0.023689
GSE37534_GW1929_VS_PIOGLITAZONE_TREATED_CD4_TCELL_PPARG1_FOXP3_TRANSDUCED_UP	Sell:S1pr1	down	2	1	0.00505474	0.023689
GSE37533_UNTREATED_VS_PIOGLIZATONE_TREATED_CD4_TCELL_PPARG2_AND_FOXP3_TRASDUCED_DN	Tcf7:Ctsw	down	2	1	0.00387483	0.023689
GSE39022_LN_VS_SPLEEN_DC_DN	Dgka:Cpm	down	2	1	0.00512595	0.023689
GSE38681_WT_VS_LYL1_KO_LYMPHOID_PRIMED_MULTIPOTENT_PROGENITOR_UP	Tubb2a:Cd27	down	2	1	0.00519776	0.023689
GSE38681_WT_VS_LYL1_KO_LYMPHOID_PRIMED_MULTIPOTENT_PROGENITOR_DN	Sh3bgrl2:Lmo4	down	2	1	0.00519776	0.023689
GSE36527_CD62L_HIGH_CD69_NEG_VS_CD62L_LOW_CD69_POS_TREG_KLRG1_NEG_UP	Cd27:Tubb2a	down	2	1	0.00519776	0.023689
GSE36527_CD69_NEG_VS_POS_TREG_CD62L_LOS_KLRG1_NEG_DN	Sesn1:Ctsw	down	2	1	0.00519776	0.023689
GSE34006_WT_VS_A2AR_KO_TREG_UP	Sh3bgrl2:Lmo4	down	2	1	0.00519776	0.023689
GSE32034_LY6C_HIGH_VS_LOW_ROSIGLIZATONE_TREATED_MONOCYTE_DN	Ugcg:Ikzf1	down	2	1	0.00519776	0.023689
GSE39152_BRAIN_VS_SPLEEN_CD103_NEG_MEMORY_CD8_TCELL_DN	Ugcg:Bcl6	down	2	1	0.00519776	0.023689
GSE35685_CD34POS_CD38NEG_VS_CD34POS_CD10POS_BONE_MARROW_UP	Ephx1:Sesn1	down	2	1	0.00512595	0.023689
GSE35685_CD34POS_CD38NEG_VS_CD34POS_CD10POS_BONE_MARROW_DN	Ugcg:Dck	down	2	1	0.00519776	0.023689
GSE40274_CTRL_VS_SATB1_TRANSDUCED_ACTIVATED_CD4_TCELL_DN	Tubb2a:Bcl2l11	down	2	1	0.004311	0.023689
GSE40274_CTRL_VS_FOXP3_AND_EOS_TRANSDUCED_ACTIVATED_CD4_TCELL_UP	Dgka:Sell	down	2	1	0.00418347	0.023689
GSE40274_CTRL_VS_FOXP3_AND_PBX1_TRANSDUCED_ACTIVATED_CD4_TCELL_UP	Bcl6:Cpm	down	2	1	0.00387483	0.023689
GSE40274_CTRL_VS_FOXP3_AND_HELIOS_TRANSDUCED_ACTIVATED_CD4_TCELL_UP	Evi2b:Gpr171	down	2	1	0.00512595	0.023689
GSE40274_FOXP3_VS_FOXP3_AND_EOS_TRANSDUCED_ACTIVATED_CD4_TCELL_UP	B4galnt1:Gpr174	down	2	1	0.00519776	0.023689
GSE40273_XBP1_KO_VS_WT_TREG_DN	St8sia6:Gpr34	down	2	1	0.00519776	0.023689
GSE40274_CTRL_VS_FOXP3_TRANSDUCED_ACTIVATED_CD4_TCELL_DN	St8sia6:Evi2b	down	2	1	0.00519776	0.023689
GSE40274_FOXP3_VS_FOXP3_AND_SATB1_TRANSDUCED_ACTIVATED_CD4_TCELL_DN	Tcf7:Dgka	down	2	1	0.00450671	0.023689
GSE40274_FOXP3_VS_FOXP3_AND_XBP1_TRANSDUCED_ACTIVATED_CD4_TCELL_DN	Tcf7:Lef1	down	2	1	0.00375541	0.023689
GSE40274_GATA1_VS_FOXP3_AND_GATA1_TRANSDUCED_ACTIVATED_CD4_TCELL_UP	Gpr34:Sesn1	down	2	1	0.00519776	0.023689
GSE40277_GATA1_AND_SATB1_TRANSDUCED_VS_CTRL_CD4_TCELL_DN	Tubb2b:Tubb2a	down	2	1	0.00512595	0.023689
GSE40274_FOXP3_VS_FOXP3_AND_LEF1_TRANSDUCED_ACTIVATED_CD4_TCELL_DN	Ctsw:Stmn1	down	2	1	0.00519776	0.023689
GSE40666_NAIVE_VS_EFFECTOR_CD8_TCELL_WITH_IFNA_STIM_90MIN_DN	Sytl2:Tubb2b	down	2	1	0.00519776	0.023689
GSE40666_WT_VS_STAT1_KO_CD8_TCELL_WITH_IFNA_STIM_90MIN_UP	Pou2af1:Gpr34	down	2	1	0.00519776	0.023689
GSE40666_WT_VS_STAT1_KO_CD8_TCELL_WITH_IFNA_STIM_90MIN_DN	Ctsw:Gpr171	down	2	1	0.00519776	0.023689
GSE40666_WT_VS_STAT4_KO_CD8_TCELL_WITH_IFNA_STIM_90MIN_DN	Sh3bgrl2:Ctsw	down	2	1	0.00519776	0.023689
GSE40666_WT_VS_STAT4_KO_CD8_TCELL_DN	Gpr34:Sesn1	down	2	1	0.00512595	0.023689
GSE40666_UNTREATED_VS_IFNA_STIM_STAT1_KO_CD8_TCELL_90MIN_DN	Bcl6:Sesn1	down	2	1	0.00498414	0.023689
GSE40666_UNTREATED_VS_IFNA_STIM_EFFECTOR_CD8_TCELL_90MIN_UP	Tcf7:Cd27	down	2	1	0.00519776	0.023689
GSE40666_UNTREATED_VS_IFNA_STIM_STAT4_KO_EFFECTOR_CD8_TCELL_90MIN_DN	Bcl6:Sesn1	down	2	1	0.00512595	0.023689
GSE20727_CTRL_VS_ROS_INH_AND_DNFB_ALLERGEN_TREATED_DC_DN	Bcl2l11:Cd27	down	2	1	0.00498414	0.023689
GSE20727_H2O2_VS_ROS_INHIBITOR_TREATED_DC_UP	Sesn1:Itm2a	down	2	1	0.00519776	0.023689
GSE40068_CXCR5POS_BCL6POS_TFH_VS_CXCR5NEG_BCL6NEG_CD4_TCELL_UP	Sell:S1pr1	down	2	1	0.00519776	0.023689
GSE40068_BCL6_POS_VS_NEG_CXCR5_POS_TFH_DN	Itm2a:Nsg2	down	2	1	0.00512595	0.023689
GSE40068_CXCR5NEG_BCL6NEG_CD4_TCELL_VS_CXCR5POS_BCL6NEG_TFH_UP	Acsbg1:Ctsw	down	2	1	0.00519776	0.023689
GSE40068_CXCR5NEG_BCL6NEG_CD4_TCELL_VS_CXCR5POS_BCL6NEG_TFH_DN	Acsbg1:Ctsw	down	2	1	0.00519776	0.023689
GSE39916_B_CELL_SPLEEN_VS_PLASMA_CELL_BONE_MARROW_DN	Gpr34:Ctsw	down	2	1	0.00519776	0.023689
GSE38304_MYC_NEG_VS_POS_GC_BCELL_DN	Ctsw:Gpr34	down	2	1	0.00512595	0.023689
GSE39110_DAY3_VS_DAY6_POST_IMMUNIZATION_CD8_TCELL_UP	Tcf7:Nsg2	down	2	1	0.00519776	0.023689
GSE36078_WT_VS_IL1R_KO_LUNG_DC_DN	Sytl2:Ctsw	down	2	1	0.00519776	0.023689
GSE11961_MARGINAL_ZONE_BCELL_VS_GERMINAL_CENTER_BCELL_DAY7_DN	Stmn1:Gpr171	down	2	1	0.00519776	0.023689
GSE11961_MARGINAL_ZONE_BCELL_VS_PLASMA_CELL_DAY7_UP	St8sia6:Prg4	down	2	1	0.00519776	0.023689
GSE11961_GERMINAL_CENTER_BCELL_DAY7_VS_GERMINAL_CENTER_BCELL_DAY40_DN	Prg4:Bcl6	down	2	1	0.00519776	0.023689
GSE11961_UNSTIM_VS_ANTI_IGM_AND_CD40_STIM_6H_FOLLICULAR_BCELL_UP	Lmo4:Stmn1	down	2	1	0.00519776	0.023689
GSE11961_UNSTIM_VS_ANTI_IGM_AND_CD40_STIM_6H_FOLLICULAR_BCELL_DN	Tcf7:Ephx1	down	2	1	0.00512595	0.023689
GSE11961_MEMORY_BCELL_DAY7_VS_MEMORY_BCELL_DAY40_DN	Ikzf1:St8sia6	down	2	1	0.00519776	0.023689
GSE28737_BCL6_HET_VS_BCL6_KO_FOLLICULAR_BCELL_DN	Bcl2l11:S1pr1	down	2	1	0.00519776	0.023689
GSE39556_UNTREATED_VS_3H_POLYIC_INJ_MOUSE_NK_CELL_UP	Ctsw:Cpm	down	2	1	0.00519776	0.023689
GSE35543_IN_VIVO_NTREG_VS_IN_VITRO_ITREG_DN	Lef1:Ikzf1	down	2	1	0.00424694	0.023689
GSE24671_CTRL_VS_SENDAI_VIRUS_INFECTED_MOUSE_SPLENOCYTES_DN	Ctsw:Ikzf1	down	2	1	0.00512595	0.023689
GSE41867_DAY6_EFFECTOR_VS_DAY30_MEMORY_CD8_TCELL_LCMV_ARMSTRONG_UP	Evi2b:Gpr34	down	2	1	0.00519776	0.023689
GSE41867_NAIVE_VS_DAY8_LCMV_ARMSTRONG_EFFECTOR_CD8_TCELL_UP	Bcl6:Lmo4	down	2	1	0.00519776	0.023689
GSE41867_NAIVE_VS_DAY8_LCMV_CLONE13_EFFECTOR_CD8_TCELL_UP	Nsg2:Stmn1	down	2	1	0.00519776	0.023689
GSE41087_WT_VS_FOXP3_MUT_ANTI_CD3_CD28_STIM_CD4_TCELL_DN	Tubb2a:Stmn1	down	2	1	0.00519776	0.023689
GSE39382_IL3_VS_IL3_IL33_TREATED_MAST_CELL_DN	Tmem158:Prg4	down	2	1	0.00512595	0.023689
GSE42021_TREG_PLN_VS_CD24HI_TREG_THYMUS_DN	Sesn1:Tubb2a	down	2	1	0.00519776	0.023689
GSE42021_CD24HI_TREG_VS_CD24HI_TCONV_THYMUS_DN	Ugcg:Itm2a	down	2	1	0.00519776	0.023689
GSE27434_WT_VS_DNMT1_KO_TREG_UP	Ctsw:Sesn1	down	2	1	0.00519776	0.023689
GSE43957_UNTREATED_VS_NACL_TREATED_ANTI_CD3_CD28_STIM_CD4_TCELL_DN	Ugcg:Bcl2l11	down	2	1	0.00519776	0.023689
GSE43956_WT_VS_SGK1_KO_TH17_DIFFERENTIATED_CD4_TCELL_DN	Bcl2l11:Ugcg	down	2	1	0.00519776	0.023689
GSE43955_TH0_VS_TGFB_IL6_TH17_ACT_CD4_TCELL_20H_UP	Bcl6:Tubb2a	down	2	1	0.00519776	0.023689
GSE43955_TH0_VS_TGFB_IL6_TH17_ACT_CD4_TCELL_30H_DN	Bcl2l11:Bcl6	down	2	1	0.00519776	0.023689
GSE43955_1H_VS_20H_ACT_CD4_TCELL_DN	Sesn1:Bcl2l11	down	2	1	0.00519776	0.023689
GSE43955_1H_VS_42H_ACT_CD4_TCELL_UP	Ctsw:Ikzf1	down	2	1	0.00519776	0.023689
GSE43955_1H_VS_42H_ACT_CD4_TCELL_DN	S1pr1:Dgka	down	2	1	0.00519776	0.023689
GSE43955_TGFB_IL6_VS_TGFB_IL6_IL23_TH17_ACT_CD4_TCELL_60H_UP	Bcl2l11:Sesn1	down	2	1	0.00519776	0.023689
GSE43955_1H_VS_10H_ACT_CD4_TCELL_WITH_TGFB_IL6_UP	Nsg2:Ephx1	down	2	1	0.00512595	0.023689
GSE43955_1H_VS_10H_ACT_CD4_TCELL_WITH_TGFB_IL6_DN	Tubb2a:Dck	down	2	1	0.00519776	0.023689
GSE43955_1H_VS_60H_ACT_CD4_TCELL_WITH_TGFB_IL6_UP	Ikzf1:Bcl6	down	2	1	0.00519776	0.023689
GSE43955_10H_VS_60H_ACT_CD4_TCELL_WITH_TGFB_IL6_DN	Tubb2a:Bcl6	down	2	1	0.00519776	0.023689
GSE43955_10H_VS_30H_ACT_CD4_TCELL_UP	Lmo4:Pou2af1	down	2	1	0.00519776	0.023689
GSE43863_DAY6_EFF_VS_DAY150_MEM_TH1_CD4_TCELL_DN	Ugcg:Sell	down	2	1	0.00519776	0.023689
GSE43863_DAY6_EFF_VS_DAY150_MEM_TFH_CD4_TCELL_UP	Tubb2b:Dck	down	2	1	0.00512595	0.023689
GSE43863_TFH_VS_LY6C_LOW_CXCR5NEG_EFFECTOR_CD4_TCELL_UP	Sell:Ugcg	down	2	1	0.00519776	0.023689
GSE43863_TFH_VS_LY6C_LOW_CXCR5NEG_EFFECTOR_CD4_TCELL_DN	Cd27:Ephx1	down	2	1	0.00512595	0.023689
GSE43863_TH1_VS_LY6C_INT_CXCR5POS_MEMORY_CD4_TCELL_DN	Dapl1:Cd27	down	2	1	0.00512595	0.023689
GSE42724_NAIVE_VS_B1_BCELL_UP	Sh3bgrl2:Dgka	down	2	1	0.00519776	0.023689
GSE42724_NAIVE_BCELL_VS_PLASMABLAST_DN	Cpm:Gpr34	down	2	1	0.00505474	0.023689
GSE45382_UNTREATED_VS_TGFB_TREATED_MACROPHAGES_DN	Neurl3:S1pr1	down	2	1	0.00470774	0.023689
GSE46606_UNSTIM_VS_CD40L_IL2_IL5_1DAY_STIMULATED_IRF4HIGH_SORTED_BCELL_UP	Ctsw:Cpm	down	2	1	0.00505474	0.023689
GSE46606_UNSTIM_VS_CD40L_IL2_IL5_1DAY_STIMULATED_IRF4MID_SORTED_BCELL_DN	Cpm:Pou2af1	down	2	1	0.00519776	0.023689
GSE46606_DAY1_VS_DAY3_CD40L_IL2_IL5_STIMULATED_IRF4MID_BCELL_UP	St8sia6:Ugcg	down	2	1	0.00519776	0.023689
GSE46606_IRF4MID_VS_WT_CD40L_IL2_IL5_DAY3_STIMULATED_BCELL_DN	Sesn1:Lmo4	down	2	1	0.00519776	0.023689
GSE45739_NRAS_KO_VS_WT_ACD3_ACD28_STIM_CD4_TCELL_DN	Sell:Bcl6	down	2	1	0.00491414	0.023689
GSE45881_CXCR6HI_VS_CXCR1LO_COLONIC_LAMINA_PROPRIA_DN	Ugcg:Pou2af1	down	2	1	0.00512595	0.023689
GSE42088_UNINF_VS_LEISHMANIA_INF_DC_4H_UP	Cpm:Ugcg	down	2	1	0.00519776	0.023689
GSE41176_WT_VS_TAK1_KO_ANTI_IGM_STIM_BCELL_24H_DN	Evi2b:Bcl2l11	down	2	1	0.00519776	0.023689
GSE45365_HEALTHY_VS_MCMV_INFECTION_CD8A_DC_DN	Lef1:Bcl2l11	down	2	1	0.00519776	0.023689
GSE45365_HEALTHY_VS_MCMV_INFECTION_CD11B_DC_UP	Noxa1:Sesn1	down	2	1	0.00437565	0.023689
GSE45365_BCELL_VS_CD8_TCELL_UP	Bcl2l11:Noxa1	down	2	1	0.004311	0.023689
GSE45365_NK_CELL_VS_BCELL_DN	Cd27:Ugcg	down	2	1	0.00324612	0.023689
KAECH_NAIVE_VS_DAY8_EFF_CD8_TCELL_DN	Stmn1	down	1	1	0.0483024	0.0922499
KAECH_NAIVE_VS_DAY15_EFF_CD8_TCELL_DN	Stmn1	down	1	1	0.0483024	0.0922499
KAECH_DAY8_EFF_VS_DAY15_EFF_CD8_TCELL_UP	Stmn1	down	1	1	0.0483024	0.0922499
KAECH_DAY15_EFF_VS_MEMORY_CD8_TCELL_UP	Pou2af1	down	1	1	0.0483024	0.0922499
GOLDRATH_NAIVE_VS_EFF_CD8_TCELL_DN	Stmn1	down	1	1	0.0483024	0.0922499
GOLDRATH_NAIVE_VS_MEMORY_CD8_TCELL_DN	Ctsw	down	1	1	0.0483024	0.0922499
GSE10239_NAIVE_VS_MEMORY_CD8_TCELL_DN	Acsbg1	down	1	1	0.0474418	0.0922499
GSE10239_NAIVE_VS_KLRG1INT_EFF_CD8_TCELL_DN	Stmn1	down	1	1	0.0483024	0.0922499
GSE10239_NAIVE_VS_KLRG1HIGH_EFF_CD8_TCELL_UP	Tcf7	down	1	1	0.0483024	0.0922499
GSE10239_NAIVE_VS_KLRG1HIGH_EFF_CD8_TCELL_DN	Stmn1	down	1	1	0.0483024	0.0922499
GSE10239_MEMORY_VS_KLRG1HIGH_EFF_CD8_TCELL_DN	Tubb2a	down	1	1	0.0483024	0.0922499
GSE10239_KLRG1INT_VS_KLRG1HIGH_EFF_CD8_TCELL_DN	Sytl2	down	1	1	0.0478714	0.0922499
GSE10239_NAIVE_VS_DAY4.5_EFF_CD8_TCELL_UP	Dapl1	down	1	1	0.0483024	0.0922499
GSE10239_NAIVE_VS_DAY4.5_EFF_CD8_TCELL_DN	Stmn1	down	1	1	0.0483024	0.0922499
GSE10239_MEMORY_VS_DAY4.5_EFF_CD8_TCELL_UP	Bcl6	down	1	1	0.0483024	0.0922499
GSE10325_CD4_TCELL_VS_BCELL_DN	Pou2af1	down	1	1	0.0457379	0.0922499
GSE10325_CD4_TCELL_VS_MYELOID_DN	Bcl6	down	1	1	0.0483024	0.0922499
GSE10325_LUPUS_CD4_TCELL_VS_LUPUS_BCELL_DN	Pou2af1	down	1	1	0.0461617	0.0922499
GSE10325_BCELL_VS_LUPUS_BCELL_UP	Tmem158	down	1	1	0.0457379	0.0922499
GSE10325_BCELL_VS_LUPUS_BCELL_DN	Bcl2l11	down	1	1	0.0483024	0.0922499
GSE10325_MYELOID_VS_LUPUS_MYELOID_UP	B4galnt1	down	1	1	0.0465869	0.0922499
GSE10463_CD40L_AND_VA347_VS_CD40L_IN_DC_DN	Dapl1	down	1	1	0.039963	0.0922499
GSE11057_NAIVE_VS_EFF_MEMORY_CD4_TCELL_DN	Evi2b	down	1	1	0.0470136	0.0922499
GSE11057_NAIVE_VS_CENT_MEMORY_CD4_TCELL_DN	Evi2b	down	1	1	0.0474418	0.0922499
GSE11057_NAIVE_CD4_VS_PBMC_CD4_TCELL_UP	Cd27	down	1	1	0.0457379	0.0922499
GSE11057_NAIVE_CD4_VS_PBMC_CD4_TCELL_DN	Pou2af1	down	1	1	0.0470136	0.0922499
GSE11057_NAIVE_VS_MEMORY_CD4_TCELL_DN	Evi2b	down	1	1	0.0470136	0.0922499
GSE11864_UNTREATED_VS_CSF1_IN_MAC_UP	Evi2b	down	1	1	0.0461617	0.0922499
GSE11864_UNTREATED_VS_CSF1_IFNG_PAM3CYS_IN_MAC_UP	Sytl2	down	1	1	0.0465869	0.0922499
GSE11864_CSF1_VS_CSF1_IFNG_IN_MAC_UP	Gpr34	down	1	1	0.0457379	0.0922499
GSE11864_CSF1_VS_CSF1_PAM3CYS_IN_MAC_DN	Ugcg	down	1	1	0.0440577	0.0922499
GSE11864_CSF1_IFNG_VS_CSF1_IFNG_PAM3CYS_IN_MAC_UP	Stmn1	down	1	1	0.0465869	0.0922499
GSE11864_CSF1_PAM3CYS_VS_CSF1_IFNG_PAM3CYS_IN_MAC_UP	Itm2a	down	1	1	0.0453157	0.0922499
GSE11864_CSF1_PAM3CYS_VS_CSF1_IFNG_PAM3CYS_IN_MAC_DN	Evi2b	down	1	1	0.0448949	0.0922499
GSE11924_TFH_VS_TH1_CD4_TCELL_UP	Ugcg	down	1	1	0.0478714	0.0922499
GSE11924_TFH_VS_TH2_CD4_TCELL_UP	Ugcg	down	1	1	0.0478714	0.0922499
GSE11924_TH1_VS_TH2_CD4_TCELL_DN	Itm2a	down	1	1	0.0483024	0.0922499
GSE12366_PLASMA_CELL_VS_NAIVE_BCELL_UP	Bcl2l11	down	1	1	0.0453157	0.0922499
GSE12366_PLASMA_CELL_VS_MEMORY_BCELL_DN	Dck	down	1	1	0.0474418	0.0922499
GSE12366_NAIVE_VS_MEMORY_BCELL_UP	S1pr1	down	1	1	0.0448949	0.0922499
GSE12845_IGD_POS_VS_NEG_BLOOD_BCELL_DN	Bcl2l11	down	1	1	0.0465869	0.0922499
GSE12845_IGD_POS_BLOOD_VS_NAIVE_TONSIL_BCELL_UP	Gpr171	down	1	1	0.0461617	0.0922499
GSE12845_IGD_POS_BLOOD_VS_PRE_GC_TONSIL_BCELL_UP	Sell	down	1	1	0.0478714	0.0922499
GSE12845_IGD_POS_BLOOD_VS_PRE_GC_TONSIL_BCELL_DN	Tubb2a	down	1	1	0.0483024	0.0922499
GSE12845_IGD_POS_BLOOD_VS_DARKZONE_GC_TONSIL_BCELL_UP	Gpr171	down	1	1	0.0465869	0.0922499
GSE12845_IGD_POS_BLOOD_VS_DARKZONE_GC_TONSIL_BCELL_DN	Bcl6	down	1	1	0.0478714	0.0922499
GSE12845_IGD_NEG_BLOOD_VS_PRE_GC_TONSIL_BCELL_UP	Cd27	down	1	1	0.0478714	0.0922499
GSE12845_IGD_NEG_BLOOD_VS_PRE_GC_TONSIL_BCELL_DN	Tubb2a	down	1	1	0.0465869	0.0922499
GSE12845_IGD_NEG_BLOOD_VS_DARKZONE_GC_TONSIL_BCELL_UP	Itm2a	down	1	1	0.0465869	0.0922499
GSE12845_PRE_GC_VS_DARKZONE_GC_TONSIL_BCELL_UP	Ugcg	down	1	1	0.0461617	0.0922499
GSE12845_PRE_GC_VS_DARKZONE_GC_TONSIL_BCELL_DN	Cd27	down	1	1	0.0478714	0.0922499
GSE13229_IMM_VS_MATURE_NKCELL_DN	Ephx1	down	1	1	0.0478714	0.0922499
GSE13229_IMM_VS_INTMATURE_NKCELL_DN	Lef1	down	1	1	0.0483024	0.0922499
GSE13306_TREG_VS_TCONV_LAMINA_PROPRIA_DN	Pou2af1	down	1	1	0.0483024	0.0922499
GSE13306_TREG_VS_TCONV_SPLEEN_UP	Sesn1	down	1	1	0.0483024	0.0922499
GSE13306_TREG_VS_TCONV_DN	Tcf7	down	1	1	0.0483024	0.0922499
GSE13306_RA_VS_UNTREATED_TREG_UP	Tmem158	down	1	1	0.0483024	0.0922499
GSE13306_RA_VS_UNTREATED_TCONV_DN	Dck	down	1	1	0.0483024	0.0922499
GSE13306_RA_VS_UNTREATED_MEM_CD4_TCELL_UP	Ctsw	down	1	1	0.0483024	0.0922499
GSE13411_NAIVE_VS_IGM_MEMORY_BCELL_UP	Bcl6	down	1	1	0.0461617	0.0922499
GSE13411_NAIVE_VS_SWITCHED_MEMORY_BCELL_DN	Pou2af1	down	1	1	0.0474418	0.0922499
GSE13411_IGM_MEMORY_BCELL_VS_PLASMA_CELL_UP	Dgka	down	1	1	0.0474418	0.0922499
GSE13411_SWITCHED_MEMORY_BCELL_VS_PLASMA_CELL_UP	Dgka	down	1	1	0.0483024	0.0922499
GSE13484_UNSTIM_VS_3H_YF17D_VACCINE_STIM_PBMC_UP	Cd27	down	1	1	0.0478714	0.0922499
GSE13484_UNSTIM_VS_12H_YF17D_VACCINE_STIM_PBMC_DN	Cpm	down	1	1	0.0483024	0.0922499
GSE13484_12H_VS_3H_YF17D_VACCINE_STIM_PBMC_UP	Cpm	down	1	1	0.0483024	0.0922499
GSE13484_12H_VS_3H_YF17D_VACCINE_STIM_PBMC_DN	Lmo4	down	1	1	0.0483024	0.0922499
GSE13484_UNSTIM_VS_YF17D_VACCINE_STIM_PBMC_DN	Bcl6	down	1	1	0.0483024	0.0922499
GSE13485_CTRL_VS_DAY21_YF17D_VACCINE_PBMC_DN	Nsg2	down	1	1	0.0403655	0.0922499
GSE13485_DAY1_VS_DAY21_YF17D_VACCINE_PBMC_DN	Nsg2	down	1	1	0.0465869	0.0922499
GSE13493_DP_VS_CD4INTCD8POS_THYMOCYTE_UP	Dck	down	1	1	0.0478714	0.0922499
GSE13493_DP_VS_CD4INTCD8POS_THYMOCYTE_DN	Pou2af1	down	1	1	0.0483024	0.0922499
GSE13493_DP_VS_CD8POS_THYMOCYTE_DN	Pou2af1	down	1	1	0.0483024	0.0922499
GSE13493_CD4INTCD8POS_VS_CD8POS_THYMOCYTE_UP	Cd27	down	1	1	0.0478714	0.0922499
GSE14000_TRANSLATED_RNA_VS_MRNA_16H_LPS_DC_UP	Prg4	down	1	1	0.0424015	0.0922499
GSE14000_UNSTIM_VS_4H_LPS_DC_TRANSLATED_RNA_DN	Neurl3	down	1	1	0.0470136	0.0922499
GSE14000_UNSTIM_VS_4H_LPS_DC_DN	Neurl3	down	1	1	0.0474418	0.0922499
GSE14000_UNSTIM_VS_16H_LPS_DC_DN	Tubb2a	down	1	1	0.0483024	0.0922499
GSE14308_TH2_VS_TH1_UP	Gpr174	down	1	1	0.0478714	0.0922499
GSE14308_TH2_VS_TH1_DN	Bcl6	down	1	1	0.0483024	0.0922499
GSE14308_TH2_VS_TH17_DN	S1pr1	down	1	1	0.0483024	0.0922499
GSE14308_TH2_VS_NAIVE_CD4_TCELL_UP	Gpr174	down	1	1	0.0483024	0.0922499
GSE14308_TH2_VS_NATURAL_TREG_DN	Ikzf1	down	1	1	0.0478714	0.0922499
GSE14308_TH1_VS_TH17_DN	Gpr174	down	1	1	0.0483024	0.0922499
GSE14308_TH1_VS_NATURAL_TREG_UP	Ugcg	down	1	1	0.0474418	0.0922499
GSE14308_TH1_VS_NATURAL_TREG_DN	Gpr174	down	1	1	0.0483024	0.0922499
GSE14308_TH17_VS_INDUCED_TREG_UP	B4galnt1	down	1	1	0.0483024	0.0922499
GSE14308_TH17_VS_INDUCED_TREG_DN	Dapl1	down	1	1	0.0483024	0.0922499
GSE14308_NAIVE_CD4_TCELL_VS_NATURAL_TREG_UP	Evi2b	down	1	1	0.0483024	0.0922499
GSE14308_INDUCED_VS_NATURAL_TREG_UP	Tubb2b	down	1	1	0.0478714	0.0922499
GSE1432_CTRL_VS_IFNG_1H_MICROGLIA_DN	Bcl6	down	1	1	0.0470136	0.0922499
GSE1432_CTRL_VS_IFNG_6H_MICROGLIA_UP	Dgka	down	1	1	0.0483024	0.0922499
GSE1432_CTRL_VS_IFNG_24H_MICROGLIA_DN	Sell	down	1	1	0.0483024	0.0922499
GSE1432_1H_VS_6H_IFNG_MICROGLIA_UP	Sesn1	down	1	1	0.0483024	0.0922499
GSE1432_1H_VS_24H_IFNG_MICROGLIA_DN	Sell	down	1	1	0.0483024	0.0922499
GSE14350_TREG_VS_TEFF_IN_IL2RB_KO_UP	Dgka	down	1	1	0.0483024	0.0922499
GSE14350_IL2RB_KO_VS_WT_TREG_UP	Dapl1	down	1	1	0.0478714	0.0922499
GSE1448_CTRL_VS_ANTI_VALPHA2_DP_THYMOCYTE_DN	Bcl2l11	down	1	1	0.0483024	0.0922499
GSE1460_INTRATHYMIC_T_PROGENITOR_VS_DP_THYMOCYTE_UP	Sell	down	1	1	0.0474418	0.0922499
GSE1460_INTRATHYMIC_T_PROGENITOR_VS_CD4_THYMOCYTE_UP	Stmn1	down	1	1	0.0483024	0.0922499
GSE1460_INTRATHYMIC_T_PROGENITOR_VS_NAIVE_CD4_TCELL_CORD_BLOOD_UP	Stmn1	down	1	1	0.0478714	0.0922499
GSE1460_INTRATHYMIC_T_PROGENITOR_VS_NAIVE_CD4_TCELL_CORD_BLOOD_DN	S1pr1	down	1	1	0.0478714	0.0922499
GSE1460_INTRATHYMIC_T_PROGENITOR_VS_NAIVE_CD4_TCELL_ADULT_BLOOD_DN	Evi2b	down	1	1	0.0470136	0.0922499
GSE1460_INTRATHYMIC_T_PROGENITOR_VS_THYMIC_STROMAL_CELL_UP	Stmn1	down	1	1	0.0465869	0.0922499
GSE1460_DP_THYMOCYTE_VS_NAIVE_CD4_TCELL_CORD_BLOOD_DN	S1pr1	down	1	1	0.0478714	0.0922499
GSE1460_DP_THYMOCYTE_VS_NAIVE_CD4_TCELL_ADULT_BLOOD_DN	S1pr1	down	1	1	0.0470136	0.0922499
GSE1460_DP_THYMOCYTE_VS_THYMIC_STROMAL_CELL_UP	Ikzf1	down	1	1	0.0461617	0.0922499
GSE1460_CD4_THYMOCYTE_VS_THYMIC_STROMAL_CELL_DN	Tubb2a	down	1	1	0.0478714	0.0922499
GSE1460_NAIVE_CD4_TCELL_CORD_BLOOD_VS_THYMIC_STROMAL_CELL_UP	Dgka	down	1	1	0.0453157	0.0922499
GSE1460_NAIVE_CD4_TCELL_ADULT_BLOOD_VS_THYMIC_STROMAL_CELL_UP	Ikzf1	down	1	1	0.0453157	0.0922499
GSE14769_UNSTIM_VS_20MIN_LPS_BMDM_DN	Gpr174	down	1	1	0.0483024	0.0922499
GSE14769_UNSTIM_VS_40MIN_LPS_BMDM_UP	Dapl1	down	1	1	0.0478714	0.0922499
GSE14769_UNSTIM_VS_40MIN_LPS_BMDM_DN	Bcl6	down	1	1	0.0483024	0.0922499
GSE14769_UNSTIM_VS_60MIN_LPS_BMDM_DN	Bcl2l11	down	1	1	0.0483024	0.0922499
GSE14769_UNSTIM_VS_120MIN_LPS_BMDM_UP	Sesn1	down	1	1	0.0483024	0.0922499
GSE14769_UNSTIM_VS_360MIN_LPS_BMDM_UP	Stmn1	down	1	1	0.0483024	0.0922499
GSE14769_40MIN_VS_360MIN_LPS_BMDM_UP	Stmn1	down	1	1	0.0483024	0.0922499
GSE15215_CD2_POS_VS_NEG_PDC_UP	Tcf7	down	1	1	0.0465869	0.0922499
GSE15324_NAIVE_VS_ACTIVATED_ELF4_KO_CD8_TCELL_UP	Bcl2l11	down	1	1	0.0483024	0.0922499
GSE15324_ELF4_KO_VS_WT_NAIVE_CD8_TCELL_UP	Acsbg1	down	1	1	0.0483024	0.0922499
GSE15324_ELF4_KO_VS_WT_NAIVE_CD8_TCELL_DN	Gpr34	down	1	1	0.0474418	0.0922499
GSE15324_ELF4_KO_VS_WT_ACTIVATED_CD8_TCELL_DN	B4galnt1	down	1	1	0.0483024	0.0922499
GSE15659_TREG_VS_TCONV_UP	Cd27	down	1	1	0.0444755	0.0922499
GSE15659_TREG_VS_TCONV_DN	Gpr171	down	1	1	0.0428133	0.0922499
GSE15659_NAIVE_CD4_TCELL_VS_RESTING_TREG_DN	Tmem158	down	1	1	0.0474418	0.0922499
GSE15659_NAIVE_CD4_TCELL_VS_NONSUPPRESSIVE_TCELL_DN	Tmem158	down	1	1	0.0483024	0.0922499
GSE15659_NAIVE_CD4_TCELL_VS_ACTIVATED_TREG_DN	Tmem158	down	1	1	0.0478714	0.0922499
GSE15659_CD45RA_NEG_CD4_TCELL_VS_NONSUPPRESSIVE_TCELL_DN	Tmem158	down	1	1	0.0483024	0.0922499
GSE15659_RESTING_TREG_VS_NONSUPPRESSIVE_TCELL_DN	Tmem158	down	1	1	0.0483024	0.0922499
GSE15733_BM_VS_SPLEEN_MEMORY_CD4_TCELL_UP	Ctsw	down	1	1	0.0483024	0.0922499
GSE15750_DAY6_VS_DAY10_EFF_CD8_TCELL_UP	Stmn1	down	1	1	0.0483024	0.0922499
GSE15750_DAY6_VS_DAY10_TRAF6KO_EFF_CD8_TCELL_UP	Stmn1	down	1	1	0.0483024	0.0922499
GSE15750_DAY6_VS_DAY10_TRAF6KO_EFF_CD8_TCELL_DN	Bcl6	down	1	1	0.0483024	0.0922499
GSE15767_MED_VS_SCS_MAC_LN_UP	Sell	down	1	1	0.0483024	0.0922499
GSE15767_MED_VS_SCS_MAC_LN_DN	Tmem158	down	1	1	0.0483024	0.0922499
GSE15930_NAIVE_VS_24H_IN_VITRO_STIM_CD8_TCELL_UP	Bcl6	down	1	1	0.0483024	0.0922499
GSE15930_NAIVE_VS_24H_IN_VITRO_STIM_CD8_TCELL_DN	Dck	down	1	1	0.0478714	0.0922499
GSE15930_NAIVE_VS_24H_IN_VITRO_STIM_IL12_CD8_TCELL_DN	Dck	down	1	1	0.0478714	0.0922499
GSE15930_NAIVE_VS_24H_IN_VITRO_STIM_INFAB_CD8_TCELL_UP	Bcl6	down	1	1	0.0483024	0.0922499
GSE15930_NAIVE_VS_24H_IN_VITRO_STIM_INFAB_CD8_TCELL_DN	Dck	down	1	1	0.0478714	0.0922499
GSE15930_NAIVE_VS_48H_IN_VITRO_STIM_CD8_TCELL_DN	Stmn1	down	1	1	0.0483024	0.0922499
GSE15930_NAIVE_VS_48H_IN_VITRO_STIM_IL12_CD8_TCELL_UP	Tcf7	down	1	1	0.0483024	0.0922499
GSE15930_NAIVE_VS_48H_IN_VITRO_STIM_IFNAB_CD8_TCELL_DN	Dck	down	1	1	0.0483024	0.0922499
GSE15930_NAIVE_VS_72H_IN_VITRO_STIM_IL12_CD8_TCELL_UP	Pou2af1	down	1	1	0.0483024	0.0922499
GSE15930_NAIVE_VS_72H_IN_VITRO_STIM_IL12_CD8_TCELL_DN	Dck	down	1	1	0.0483024	0.0922499
GSE15930_NAIVE_VS_72H_IN_VITRO_STIM_IFNAB_CD8_TCELL_DN	Dck	down	1	1	0.0483024	0.0922499
GSE15930_STIM_VS_STIM_AND_TRICHOSTATINA_24H_CD8_T_CELL_DN	S1pr1	down	1	1	0.0483024	0.0922499
GSE15930_STIM_VS_STIM_AND_TRICHOSTATINA_48H_CD8_T_CELL_UP	Sell	down	1	1	0.0483024	0.0922499
GSE15930_STIM_VS_STIM_AND_IL12_72H_CD8_T_CELL_UP	B4galnt1	down	1	1	0.0478714	0.0922499
GSE15930_STIM_VS_STIM_AND_IFNAB_72H_CD8_T_CELL_UP	B4galnt1	down	1	1	0.0478714	0.0922499
GSE16755_CTRL_VS_IFNA_TREATED_MAC_DN	Neurl3	down	1	1	0.0478714	0.0922499
GSE17580_TREG_VS_TEFF_S_MANSONI_INF_UP	Tmem158	down	1	1	0.0483024	0.0922499
GSE17580_UNINFECTED_VS_S_MANSONI_INF_TEFF_DN	Ctsw	down	1	1	0.0483024	0.0922499
GSE17721_CTRL_VS_LPS_0.5H_BMDC_UP	Gpr34	down	1	1	0.0483024	0.0922499
GSE17721_CTRL_VS_LPS_0.5H_BMDC_DN	Sytl2	down	1	1	0.0483024	0.0922499
GSE17721_CTRL_VS_LPS_1H_BMDC_UP	Stmn1	down	1	1	0.0483024	0.0922499
GSE17721_CTRL_VS_LPS_2H_BMDC_DN	Lmo4	down	1	1	0.0483024	0.0922499
GSE17721_CTRL_VS_LPS_4H_BMDC_DN	Lmo4	down	1	1	0.0483024	0.0922499
GSE17721_CTRL_VS_LPS_8H_BMDC_DN	Prg4	down	1	1	0.0478714	0.0922499
GSE17721_CTRL_VS_LPS_12H_BMDC_UP	Bcl2l11	down	1	1	0.0478714	0.0922499
GSE17721_CTRL_VS_POLYIC_0.5H_BMDC_DN	Sytl2	down	1	1	0.0478714	0.0922499
GSE17721_CTRL_VS_POLYIC_1H_BMDC_UP	Gpr34	down	1	1	0.0483024	0.0922499
GSE17721_CTRL_VS_POLYIC_4H_BMDC_DN	Cd27	down	1	1	0.0483024	0.0922499
GSE17721_CTRL_VS_POLYIC_8H_BMDC_DN	Lmo4	down	1	1	0.0483024	0.0922499
GSE17721_CTRL_VS_POLYIC_24H_BMDC_UP	Bcl2l11	down	1	1	0.0483024	0.0922499
GSE17721_CTRL_VS_POLYIC_24H_BMDC_DN	Lmo4	down	1	1	0.0483024	0.0922499
GSE17721_CTRL_VS_PAM3CSK4_0.5H_BMDC_DN	Cd27	down	1	1	0.0483024	0.0922499
GSE17721_CTRL_VS_PAM3CSK4_2H_BMDC_UP	Sesn1	down	1	1	0.0483024	0.0922499
GSE17721_CTRL_VS_PAM3CSK4_4H_BMDC_UP	Stmn1	down	1	1	0.0483024	0.0922499
GSE17721_CTRL_VS_PAM3CSK4_4H_BMDC_DN	Lmo4	down	1	1	0.0483024	0.0922499
GSE17721_CTRL_VS_PAM3CSK4_8H_BMDC_DN	Lmo4	down	1	1	0.0483024	0.0922499
GSE17721_CTRL_VS_PAM3CSK4_12H_BMDC_DN	Lmo4	down	1	1	0.0478714	0.0922499
GSE17721_CTRL_VS_CPG_0.5H_BMDC_DN	Dgka	down	1	1	0.0478714	0.0922499
GSE17721_CTRL_VS_CPG_2H_BMDC_DN	Bcl2l11	down	1	1	0.0483024	0.0922499
GSE17721_CTRL_VS_CPG_6H_BMDC_UP	Tubb2b	down	1	1	0.0483024	0.0922499
GSE17721_CTRL_VS_CPG_6H_BMDC_DN	Lmo4	down	1	1	0.0483024	0.0922499
GSE17721_CTRL_VS_CPG_8H_BMDC_UP	Bcl2l11	down	1	1	0.0483024	0.0922499
GSE17721_CTRL_VS_CPG_8H_BMDC_DN	Lmo4	down	1	1	0.0483024	0.0922499
GSE17721_CTRL_VS_CPG_12H_BMDC_DN	Lmo4	down	1	1	0.0478714	0.0922499
GSE17721_CTRL_VS_CPG_24H_BMDC_UP	Gpr34	down	1	1	0.0483024	0.0922499
GSE17721_CTRL_VS_GARDIQUIMOD_1H_BMDC_DN	Bcl6	down	1	1	0.0483024	0.0922499
GSE17721_CTRL_VS_GARDIQUIMOD_2H_BMDC_UP	Tubb2a	down	1	1	0.0483024	0.0922499
GSE17721_LPS_VS_POLYIC_0.5H_BMDC_DN	Sytl2	down	1	1	0.0478714	0.0922499
GSE17721_LPS_VS_POLYIC_1H_BMDC_UP	Bcl2l11	down	1	1	0.0483024	0.0922499
GSE17721_LPS_VS_POLYIC_1H_BMDC_DN	Sell	down	1	1	0.0483024	0.0922499
GSE17721_LPS_VS_POLYIC_2H_BMDC_DN	Sesn1	down	1	1	0.0483024	0.0922499
GSE17721_LPS_VS_POLYIC_4H_BMDC_UP	Sh3bgrl2	down	1	1	0.0483024	0.0922499
GSE17721_LPS_VS_POLYIC_4H_BMDC_DN	Bcl2l11	down	1	1	0.0483024	0.0922499
GSE17721_LPS_VS_POLYIC_6H_BMDC_UP	Sh3bgrl2	down	1	1	0.0483024	0.0922499
GSE17721_LPS_VS_POLYIC_6H_BMDC_DN	Tubb2a	down	1	1	0.0478714	0.0922499
GSE17721_LPS_VS_POLYIC_8H_BMDC_UP	Lmo4	down	1	1	0.0483024	0.0922499
GSE17721_LPS_VS_POLYIC_8H_BMDC_DN	Bcl6	down	1	1	0.0478714	0.0922499
GSE17721_LPS_VS_POLYIC_16H_BMDC_UP	Stmn1	down	1	1	0.0483024	0.0922499
GSE17721_POLYIC_VS_PAM3CSK4_2H_BMDC_UP	Sesn1	down	1	1	0.0483024	0.0922499
GSE17721_POLYIC_VS_PAM3CSK4_2H_BMDC_DN	Nsg2	down	1	1	0.0483024	0.0922499
GSE17721_POLYIC_VS_PAM3CSK4_4H_BMDC_UP	Ikzf1	down	1	1	0.0483024	0.0922499
GSE17721_POLYIC_VS_PAM3CSK4_4H_BMDC_DN	Tubb2a	down	1	1	0.0483024	0.0922499
GSE17721_POLYIC_VS_PAM3CSK4_8H_BMDC_UP	Evi2b	down	1	1	0.0483024	0.0922499
GSE17721_POLYIC_VS_PAM3CSK4_16H_BMDC_UP	Nsg2	down	1	1	0.0483024	0.0922499
GSE17721_POLYIC_VS_PAM3CSK4_24H_BMDC_DN	Stmn1	down	1	1	0.0474418	0.0922499
GSE17721_PAM3CSK4_VS_CPG_1H_BMDC_UP	Nsg2	down	1	1	0.0483024	0.0922499
GSE17721_PAM3CSK4_VS_CPG_1H_BMDC_DN	Stmn1	down	1	1	0.0478714	0.0922499
GSE17721_PAM3CSK4_VS_CPG_2H_BMDC_UP	Sesn1	down	1	1	0.0483024	0.0922499
GSE17721_PAM3CSK4_VS_CPG_4H_BMDC_DN	Dgka	down	1	1	0.0483024	0.0922499
GSE17721_PAM3CSK4_VS_CPG_8H_BMDC_DN	Dgka	down	1	1	0.0483024	0.0922499
GSE17721_PAM3CSK4_VS_CPG_16H_BMDC_UP	Prg4	down	1	1	0.0483024	0.0922499
GSE17721_PAM3CSK4_VS_CPG_16H_BMDC_DN	Tubb2b	down	1	1	0.0483024	0.0922499
GSE17721_PAM3CSK4_VS_CPG_24H_BMDC_DN	Dck	down	1	1	0.0483024	0.0922499
GSE17721_CPG_VS_GARDIQUIMOD_8H_BMDC_UP	Itm2a	down	1	1	0.0478714	0.0922499
GSE17721_CPG_VS_GARDIQUIMOD_12H_BMDC_UP	Stmn1	down	1	1	0.0483024	0.0922499
GSE17721_CPG_VS_GARDIQUIMOD_24H_BMDC_DN	Nsg2	down	1	1	0.0483024	0.0922499
GSE17721_LPS_VS_PAM3CSK4_2H_BMDC_DN	Nsg2	down	1	1	0.0478714	0.0922499
GSE17721_LPS_VS_PAM3CSK4_4H_BMDC_UP	Dgka	down	1	1	0.0483024	0.0922499
GSE17721_LPS_VS_PAM3CSK4_6H_BMDC_UP	Dgka	down	1	1	0.0483024	0.0922499
GSE17721_LPS_VS_PAM3CSK4_12H_BMDC_DN	S1pr1	down	1	1	0.0478714	0.0922499
GSE17721_POLYIC_VS_CPG_0.5H_BMDC_UP	Dgka	down	1	1	0.0478714	0.0922499
GSE17721_POLYIC_VS_CPG_0.5H_BMDC_DN	Dck	down	1	1	0.0483024	0.0922499
GSE17721_POLYIC_VS_CPG_1H_BMDC_DN	Bcl2l11	down	1	1	0.0483024	0.0922499
GSE17721_POLYIC_VS_CPG_4H_BMDC_UP	Stmn1	down	1	1	0.0483024	0.0922499
GSE17721_POLYIC_VS_CPG_6H_BMDC_UP	Lef1	down	1	1	0.0483024	0.0922499
GSE17721_POLYIC_VS_CPG_6H_BMDC_DN	Tmem158	down	1	1	0.0483024	0.0922499
GSE17721_POLYIC_VS_CPG_8H_BMDC_DN	Tubb2a	down	1	1	0.0478714	0.0922499
GSE17721_POLYIC_VS_CPG_12H_BMDC_DN	Lmo4	down	1	1	0.0483024	0.0922499
GSE17721_POLYIC_VS_CPG_16H_BMDC_UP	Nsg2	down	1	1	0.0483024	0.0922499
GSE17721_POLYIC_VS_CPG_16H_BMDC_DN	Stmn1	down	1	1	0.0483024	0.0922499
GSE17721_POLYIC_VS_CPG_24H_BMDC_UP	Nsg2	down	1	1	0.0474418	0.0922499
GSE17721_PAM3CSK4_VS_GADIQUIMOD_1H_BMDC_UP	Nsg2	down	1	1	0.0483024	0.0922499
GSE17721_PAM3CSK4_VS_GADIQUIMOD_2H_BMDC_UP	Nsg2	down	1	1	0.0478714	0.0922499
GSE17721_PAM3CSK4_VS_GADIQUIMOD_2H_BMDC_DN	Itm2a	down	1	1	0.0483024	0.0922499
GSE17721_PAM3CSK4_VS_GADIQUIMOD_4H_BMDC_UP	Tubb2a	down	1	1	0.0483024	0.0922499
GSE17721_PAM3CSK4_VS_GADIQUIMOD_4H_BMDC_DN	Tcf7	down	1	1	0.0483024	0.0922499
GSE17721_PAM3CSK4_VS_GADIQUIMOD_8H_BMDC_DN	Dgka	down	1	1	0.0483024	0.0922499
GSE17721_PAM3CSK4_VS_GADIQUIMOD_12H_BMDC_DN	Dgka	down	1	1	0.0483024	0.0922499
GSE17721_PAM3CSK4_VS_GADIQUIMOD_16H_BMDC_UP	Nsg2	down	1	1	0.0483024	0.0922499
GSE17721_PAM3CSK4_VS_GADIQUIMOD_16H_BMDC_DN	Ikzf1	down	1	1	0.0483024	0.0922499
GSE17721_LPS_VS_CPG_0.5H_BMDC_UP	Dgka	down	1	1	0.0478714	0.0922499
GSE17721_LPS_VS_CPG_1H_BMDC_UP	Nsg2	down	1	1	0.0483024	0.0922499
GSE17721_LPS_VS_CPG_6H_BMDC_UP	Sh3bgrl2	down	1	1	0.0483024	0.0922499
GSE17721_LPS_VS_CPG_8H_BMDC_DN	Tubb2a	down	1	1	0.0483024	0.0922499
GSE17721_LPS_VS_CPG_16H_BMDC_DN	Stmn1	down	1	1	0.0483024	0.0922499
GSE17721_LPS_VS_CPG_24H_BMDC_DN	Lmo4	down	1	1	0.0483024	0.0922499
GSE17721_POLYIC_VS_GARDIQUIMOD_0.5H_BMDC_UP	Dgka	down	1	1	0.0483024	0.0922499
GSE17721_POLYIC_VS_GARDIQUIMOD_4H_BMDC_UP	Stmn1	down	1	1	0.0483024	0.0922499
GSE17721_POLYIC_VS_GARDIQUIMOD_8H_BMDC_UP	Dgka	down	1	1	0.0483024	0.0922499
GSE17721_POLYIC_VS_GARDIQUIMOD_12H_BMDC_UP	Dgka	down	1	1	0.0483024	0.0922499
GSE17721_LPS_VS_GARDIQUIMOD_1H_BMDC_UP	Nsg2	down	1	1	0.0483024	0.0922499
GSE17721_LPS_VS_GARDIQUIMOD_6H_BMDC_DN	Stmn1	down	1	1	0.0478714	0.0922499
GSE17721_LPS_VS_GARDIQUIMOD_12H_BMDC_UP	Dgka	down	1	1	0.0478714	0.0922499
GSE17721_LPS_VS_GARDIQUIMOD_12H_BMDC_DN	Bcl6	down	1	1	0.0478714	0.0922499
GSE17721_LPS_VS_GARDIQUIMOD_16H_BMDC_DN	Stmn1	down	1	1	0.0483024	0.0922499
GSE17721_0.5H_VS_4H_LPS_BMDC_DN	Lmo4	down	1	1	0.0483024	0.0922499
GSE17721_0.5H_VS_8H_LPS_BMDC_UP	Tubb2b	down	1	1	0.0478714	0.0922499
GSE17721_0.5H_VS_8H_LPS_BMDC_DN	Prg4	down	1	1	0.0478714	0.0922499
GSE17721_12H_VS_24H_LPS_BMDC_DN	Sh3bgrl2	down	1	1	0.0483024	0.0922499
GSE17721_0.5H_VS_8H_POLYIC_BMDC_DN	Lmo4	down	1	1	0.0483024	0.0922499
GSE17721_0.5H_VS_24H_POLYIC_BMDC_UP	Sesn1	down	1	1	0.0478714	0.0922499
GSE17721_4H_VS_24H_POLYIC_BMDC_UP	Evi2b	down	1	1	0.0483024	0.0922499
GSE17721_4H_VS_24H_POLYIC_BMDC_DN	Sh3bgrl2	down	1	1	0.0483024	0.0922499
GSE17721_12H_VS_24H_POLYIC_BMDC_DN	Sh3bgrl2	down	1	1	0.0483024	0.0922499
GSE17721_0.5H_VS_12H_PAM3CSK4_BMDC_DN	S1pr1	down	1	1	0.0483024	0.0922499
GSE17721_0.5H_VS_8H_PAM3CSK4_BMDC_UP	Sesn1	down	1	1	0.0483024	0.0922499
GSE17721_ALL_VS_24H_PAM3CSK4_BMDC_UP	Tubb2a	down	1	1	0.0483024	0.0922499
GSE17721_ALL_VS_24H_PAM3CSK4_BMDC_DN	Prg4	down	1	1	0.0483024	0.0922499
GSE17721_0.5H_VS_12H_CPG_BMDC_UP	Ephx1	down	1	1	0.0483024	0.0922499
GSE17721_0.5H_VS_4H_CPG_BMDC_DN	Lmo4	down	1	1	0.0483024	0.0922499
GSE17721_0.5H_VS_8H_CPG_BMDC_DN	Lmo4	down	1	1	0.0483024	0.0922499
GSE17721_4_VS_24H_CPG_BMDC_UP	Stmn1	down	1	1	0.0483024	0.0922499
GSE17721_4_VS_24H_CPG_BMDC_DN	Tubb2b	down	1	1	0.0483024	0.0922499
GSE17721_12H_VS_24H_CPG_BMDC_DN	Stmn1	down	1	1	0.0483024	0.0922499
GSE17721_0.5H_VS_12H_GARDIQUIMOD_BMDC_DN	Dgka	down	1	1	0.0483024	0.0922499
GSE17721_0.5H_VS_24H_GARDIQUIMOD_BMDC_UP	Ephx1	down	1	1	0.0483024	0.0922499
GSE17721_4_VS_24H_GARDIQUIMOD_BMDC_UP	Tubb2a	down	1	1	0.0483024	0.0922499
GSE17721_4_VS_24H_GARDIQUIMOD_BMDC_DN	Lmo4	down	1	1	0.0478714	0.0922499
GSE17974_0H_VS_1H_IN_VITRO_ACT_CD4_TCELL_DN	Evi2b	down	1	1	0.0465869	0.0922499
GSE17974_0H_VS_4H_IN_VITRO_ACT_CD4_TCELL_DN	Pou2af1	down	1	1	0.0478714	0.0922499
GSE17974_CTRL_VS_ACT_IL4_AND_ANTI_IL12_0.5H_CD4_TCELL_DN	S1pr1	down	1	1	0.0432266	0.0922499
GSE17974_CTRL_VS_ACT_IL4_AND_ANTI_IL12_1H_CD4_TCELL_DN	S1pr1	down	1	1	0.0461617	0.0922499
GSE17974_CTRL_VS_ACT_IL4_AND_ANTI_IL12_6H_CD4_TCELL_UP	Sytl2	down	1	1	0.0444755	0.0922499
GSE17974_CTRL_VS_ACT_IL4_AND_ANTI_IL12_6H_CD4_TCELL_DN	Pou2af1	down	1	1	0.0465869	0.0922499
GSE17974_CTRL_VS_ACT_IL4_AND_ANTI_IL12_12H_CD4_TCELL_UP	Sytl2	down	1	1	0.0448949	0.0922499
GSE17974_CTRL_VS_ACT_IL4_AND_ANTI_IL12_24H_CD4_TCELL_UP	Evi2b	down	1	1	0.0453157	0.0922499
GSE17974_CTRL_VS_ACT_IL4_AND_ANTI_IL12_48H_CD4_TCELL_UP	Evi2b	down	1	1	0.0428133	0.0922499
GSE17974_IL4_AND_ANTI_IL12_VS_UNTREATED_0.5H_ACT_CD4_TCELL_UP	Evi2b	down	1	1	0.0436414	0.0922499
GSE17974_IL4_AND_ANTI_IL12_VS_UNTREATED_4H_ACT_CD4_TCELL_DN	Cd27	down	1	1	0.0419912	0.0922499
GSE17974_IL4_AND_ANTI_IL12_VS_UNTREATED_6H_ACT_CD4_TCELL_UP	Tmem158	down	1	1	0.0432266	0.0922499
GSE17974_IL4_AND_ANTI_IL12_VS_UNTREATED_6H_ACT_CD4_TCELL_DN	Sytl2	down	1	1	0.0465869	0.0922499
GSE17974_IL4_AND_ANTI_IL12_VS_UNTREATED_12H_ACT_CD4_TCELL_UP	Evi2b	down	1	1	0.0457379	0.0922499
GSE17974_IL4_AND_ANTI_IL12_VS_UNTREATED_24H_ACT_CD4_TCELL_UP	Bcl2l11	down	1	1	0.0411753	0.0922499
GSE17974_IL4_AND_ANTI_IL12_VS_UNTREATED_72H_ACT_CD4_TCELL_UP	Evi2b	down	1	1	0.0407696	0.0922499
GSE17974_0.5H_VS_72H_UNTREATED_IN_VITRO_CD4_TCELL_UP	S1pr1	down	1	1	0.0453157	0.0922499
GSE17974_1H_VS_72H_UNTREATED_IN_VITRO_CD4_TCELL_UP	Bcl2l11	down	1	1	0.0461617	0.0922499
GSE17974_0.5H_VS_72H_IL4_AND_ANTI_IL12_ACT_CD4_TCELL_UP	S1pr1	down	1	1	0.0470136	0.0922499
GSE17974_0.5H_VS_72H_IL4_AND_ANTI_IL12_ACT_CD4_TCELL_DN	Stmn1	down	1	1	0.0461617	0.0922499
GSE17974_2.5H_VS_72H_IL4_AND_ANTI_IL12_ACT_CD4_TCELL_UP	S1pr1	down	1	1	0.0474418	0.0922499
GSE17974_2.5H_VS_72H_IL4_AND_ANTI_IL12_ACT_CD4_TCELL_DN	Stmn1	down	1	1	0.0461617	0.0922499
GSE18791_CTRL_VS_NEWCASTLE_VIRUS_DC_1H_UP	Itm2a	down	1	1	0.0379738	0.0922499
GSE18791_CTRL_VS_NEWCASTLE_VIRUS_DC_2H_DN	Neurl3	down	1	1	0.0391626	0.0922499
GSE18791_CTRL_VS_NEWCASTLE_VIRUS_DC_16H_DN	Neurl3	down	1	1	0.0453157	0.0922499
GSE18791_CTRL_VS_NEWCASTLE_VIRUS_DC_18H_DN	Neurl3	down	1	1	0.0444755	0.0922499
GSE18791_UNSTIM_VS_NEWCATSLE_VIRUS_DC_6H_UP	Bcl6	down	1	1	0.0461617	0.0922499
GSE18791_UNSTIM_VS_NEWCATSLE_VIRUS_DC_10H_DN	Neurl3	down	1	1	0.0465869	0.0922499
GSE18791_UNSTIM_VS_NEWCATSLE_VIRUS_DC_18H_DN	Neurl3	down	1	1	0.0436414	0.0922499
GSE19825_NAIVE_VS_IL2RAHIGH_DAY3_EFF_CD8_TCELL_UP	Bcl2l11	down	1	1	0.0483024	0.0922499
GSE19825_CD24LOW_VS_IL2RA_HIGH_DAY3_EFF_CD8_TCELL_UP	Gpr171	down	1	1	0.0483024	0.0922499
GSE20151_CTRL_VS_FUSOBACT_NUCLEATUM_NEUTROPHIL_UP	Ephx1	down	1	1	0.0470136	0.0922499
GSE20151_CTRL_VS_FUSOBACT_NUCLEATUM_NEUTROPHIL_DN	Stmn1	down	1	1	0.0478714	0.0922499
GSE20366_TREG_VS_TCONV_DN	Lef1	down	1	1	0.0483024	0.0922499
GSE20366_EX_VIVO_VS_DEC205_CONVERSION_UP	Sytl2	down	1	1	0.0478714	0.0922499
GSE20366_EX_VIVO_VS_DEC205_CONVERSION_DN	St8sia6	down	1	1	0.0483024	0.0922499
GSE20366_EX_VIVO_VS_HOMEOSTATIC_CONVERSION_NAIVE_CD4_TCELL_UP	Cpm	down	1	1	0.0483024	0.0922499
GSE20366_CD103_POS_VS_NEG_TREG_KLRG1NEG_UP	Tubb2b	down	1	1	0.0483024	0.0922499
GSE20366_CD103_KLRG1_DP_VS_DN_TREG_UP	Sell	down	1	1	0.0483024	0.0922499
GSE20366_CD103_KLRG1_DP_VS_DN_TREG_DN	Sytl2	down	1	1	0.0483024	0.0922499
GSE20715_WT_VS_TLR4_KO_LUNG_DN	B4galnt1	down	1	1	0.0478714	0.0922499
GSE20715_WT_VS_TLR4_KO_6H_OZONE_LUNG_UP	Ikzf1	down	1	1	0.0483024	0.0922499
GSE20715_WT_VS_TLR4_KO_24H_OZONE_LUNG_UP	Ephx1	down	1	1	0.0474418	0.0922499
GSE20715_WT_VS_TLR4_KO_24H_OZONE_LUNG_DN	Cd27	down	1	1	0.0483024	0.0922499
GSE20715_WT_VS_TLR4_KO_48H_OZONE_LUNG_UP	S1pr1	down	1	1	0.0483024	0.0922499
GSE20715_0H_VS_6H_OZONE_LUNG_UP	Evi2b	down	1	1	0.0483024	0.0922499
GSE20715_0H_VS_24H_OZONE_TLR4_KO_LUNG_UP	Ephx1	down	1	1	0.0478714	0.0922499
GSE22045_TREG_VS_TCONV_DN	Lef1	down	1	1	0.0436414	0.0922499
GSE22886_UNSTIM_VS_STIM_MEMORY_TCELL_UP	Sesn1	down	1	1	0.0470136	0.0922499
GSE22886_NAIVE_CD4_TCELL_VS_MEMORY_TCELL_DN	Dck	down	1	1	0.0483024	0.0922499
GSE22886_NAIVE_VS_MEMORY_TCELL_UP	Tcf7	down	1	1	0.0457379	0.0922499
GSE22886_CD4_TCELL_VS_BCELL_NAIVE_DN	Pou2af1	down	1	1	0.0465869	0.0922499
GSE22886_NAIVE_VS_IGG_IGA_MEMORY_BCELL_UP	Sesn1	down	1	1	0.0474418	0.0922499
GSE22886_NAIVE_VS_IGM_MEMORY_BCELL_UP	Sesn1	down	1	1	0.0465869	0.0922499
GSE22886_IGA_VS_IGM_MEMORY_BCELL_UP	Tubb2b	down	1	1	0.0465869	0.0922499
GSE22886_IGA_VS_IGM_MEMORY_BCELL_DN	Ugcg	down	1	1	0.0478714	0.0922499
GSE22886_NAIVE_BCELL_VS_BLOOD_PLASMA_CELL_UP	Sell	down	1	1	0.0483024	0.0922499
GSE22886_NAIVE_BCELL_VS_BM_PLASMA_CELL_UP	Sell	down	1	1	0.0483024	0.0922499
GSE22886_IGG_IGA_MEMORY_BCELL_VS_BLOOD_PLASMA_CELL_DN	Cd27	down	1	1	0.0474418	0.0922499
GSE22886_IGG_IGA_MEMORY_BCELL_VS_BM_PLASMA_CELL_DN	Ctsw	down	1	1	0.0461617	0.0922499
GSE22886_IGM_MEMORY_BCELL_VS_BM_PLASMA_CELL_DN	Ctsw	down	1	1	0.0478714	0.0922499
GSE22886_DAY0_VS_DAY1_MONOCYTE_IN_CULTURE_DN	Ugcg	down	1	1	0.0483024	0.0922499
GSE22886_DAY0_VS_DAY7_MONOCYTE_IN_CULTURE_UP	Sell	down	1	1	0.0478714	0.0922499
GSE22886_DAY1_VS_DAY7_MONOCYTE_IN_CULTURE_DN	Sesn1	down	1	1	0.0483024	0.0922499
GSE22886_NEUTROPHIL_VS_MONOCYTE_UP	Pou2af1	down	1	1	0.0474418	0.0922499
GSE22886_DC_VS_MONOCYTE_UP	Sesn1	down	1	1	0.0483024	0.0922499
GSE22886_DC_VS_MONOCYTE_DN	Sell	down	1	1	0.0483024	0.0922499
GSE22886_NAIVE_TCELL_VS_NEUTROPHIL_UP	Dgka	down	1	1	0.0478714	0.0922499
GSE22886_NAIVE_TCELL_VS_NEUTROPHIL_DN	Bcl6	down	1	1	0.0478714	0.0922499
GSE22886_NAIVE_TCELL_VS_MONOCYTE_DN	Bcl6	down	1	1	0.0483024	0.0922499
GSE22886_NAIVE_BCELL_VS_NEUTROPHIL_UP	Pou2af1	down	1	1	0.0478714	0.0922499
GSE22886_NAIVE_BCELL_VS_MONOCYTE_UP	Pou2af1	down	1	1	0.0470136	0.0922499
GSE22886_NAIVE_CD8_TCELL_VS_MONOCYTE_DN	Bcl6	down	1	1	0.0483024	0.0922499
GSE22886_NAIVE_CD4_TCELL_VS_MONOCYTE_DN	Bcl6	down	1	1	0.0483024	0.0922499
GSE22886_TH1_VS_TH2_12H_ACT_UP	Ephx1	down	1	1	0.0478714	0.0922499
GSE22886_IL2_VS_IL15_STIM_NKCELL_UP	Ephx1	down	1	1	0.0461617	0.0922499
GSE22886_IL2_VS_IL15_STIM_NKCELL_DN	Pou2af1	down	1	1	0.0461617	0.0922499
GSE22886_NAIVE_CD4_TCELL_VS_48H_ACT_TH1_UP	Lef1	down	1	1	0.0483024	0.0922499
GSE22886_NAIVE_CD4_TCELL_VS_12H_ACT_TH2_UP	S1pr1	down	1	1	0.0478714	0.0922499
GSE22886_NAIVE_CD4_TCELL_VS_12H_ACT_TH2_DN	Gpr171	down	1	1	0.0478714	0.0922499
GSE22886_UNSTIM_VS_IL15_STIM_NKCELL_UP	Sell	down	1	1	0.0465869	0.0922499
GSE24026_PD1_LIGATION_VS_CTRL_IN_ACT_TCELL_LINE_UP	Itm2a	down	1	1	0.0470136	0.0922499
GSE24102_GRANULOCYSTIC_MDSC_VS_NEUTROPHIL_DN	Tubb2b	down	1	1	0.0483024	0.0922499
GSE24142_EARLY_THYMIC_PROGENITOR_VS_DN2_THYMOCYTE_FETAL_UP	S1pr1	down	1	1	0.0483024	0.0922499
GSE24142_EARLY_THYMIC_PROGENITOR_VS_DN3_THYMOCYTE_FETAL_UP	S1pr1	down	1	1	0.0483024	0.0922499
GSE24634_NAIVE_CD4_TCELL_VS_DAY7_IL4_CONV_TREG_UP	Tcf7	down	1	1	0.0483024	0.0922499
GSE24634_NAIVE_CD4_TCELL_VS_DAY10_IL4_CONV_TREG_UP	Sell	down	1	1	0.0474418	0.0922499
GSE24634_TREG_VS_TCONV_POST_DAY5_IL4_CONVERSION_DN	Bcl6	down	1	1	0.0474418	0.0922499
GSE24634_TREG_VS_TCONV_POST_DAY7_IL4_CONVERSION_UP	Itm2a	down	1	1	0.0478714	0.0922499
GSE24634_TREG_VS_TCONV_POST_DAY7_IL4_CONVERSION_DN	Tcf7	down	1	1	0.0474418	0.0922499
GSE24634_TREG_VS_TCONV_POST_DAY10_IL4_CONVERSION_UP	Gpr171	down	1	1	0.0474418	0.0922499
GSE24634_TEFF_VS_TCONV_DAY3_IN_CULTURE_UP	Stmn1	down	1	1	0.0478714	0.0922499
GSE24634_TEFF_VS_TCONV_DAY5_IN_CULTURE_UP	Stmn1	down	1	1	0.0474418	0.0922499
GSE24634_TEFF_VS_TCONV_DAY5_IN_CULTURE_DN	Lef1	down	1	1	0.0478714	0.0922499
GSE24634_TEFF_VS_TCONV_DAY7_IN_CULTURE_UP	Stmn1	down	1	1	0.0483024	0.0922499
GSE24634_TEFF_VS_TCONV_DAY10_IN_CULTURE_DN	Tcf7	down	1	1	0.0483024	0.0922499
GSE24634_IL4_VS_CTRL_TREATED_NAIVE_CD4_TCELL_DAY3_UP	Stmn1	down	1	1	0.0478714	0.0922499
GSE24634_IL4_VS_CTRL_TREATED_NAIVE_CD4_TCELL_DAY5_DN	Gpr171	down	1	1	0.0478714	0.0922499
GSE24634_IL4_VS_CTRL_TREATED_NAIVE_CD4_TCELL_DAY7_UP	Stmn1	down	1	1	0.0474418	0.0922499
GSE24634_IL4_VS_CTRL_TREATED_NAIVE_CD4_TCELL_DAY7_DN	Lmo4	down	1	1	0.0483024	0.0922499
GSE24634_IL4_VS_CTRL_TREATED_NAIVE_CD4_TCELL_DAY10_DN	Lmo4	down	1	1	0.0478714	0.0922499
GSE25087_TREG_VS_TCONV_FETUS_UP	Ugcg	down	1	1	0.0474418	0.0922499
GSE26495_NAIVE_VS_PD1LOW_CD8_TCELL_UP	Lef1	down	1	1	0.0461617	0.0922499
GSE26495_NAIVE_VS_PD1LOW_CD8_TCELL_DN	Sytl2	down	1	1	0.0478714	0.0922499
GSE26928_NAIVE_VS_EFF_MEMORY_CD4_TCELL_UP	S1pr1	down	1	1	0.0444755	0.0922499
GSE26928_NAIVE_VS_CENT_MEMORY_CD4_TCELL_UP	Ikzf1	down	1	1	0.0444755	0.0922499
GSE26928_CENTR_MEMORY_VS_CXCR5_POS_CD4_TCELL_UP	Ctsw	down	1	1	0.0428133	0.0922499
GSE2706_UNSTIM_VS_2H_LPS_DC_DN	Tubb2a	down	1	1	0.0440577	0.0922499
GSE2706_UNSTIM_VS_8H_LPS_DC_DN	Tubb2a	down	1	1	0.0470136	0.0922499
GSE2706_UNSTIM_VS_2H_LPS_AND_R848_DC_UP	Itm2a	down	1	1	0.0440577	0.0922499
GSE2706_UNSTIM_VS_2H_LPS_AND_R848_DC_DN	Tubb2a	down	1	1	0.0436414	0.0922499
GSE2706_UNSTIM_VS_8H_LPS_AND_R848_DC_DN	Tubb2a	down	1	1	0.0461617	0.0922499
GSE2706_R848_VS_LPS_2H_STIM_DC_UP	Tubb2a	down	1	1	0.0415825	0.0922499
GSE2706_R848_VS_LPS_8H_STIM_DC_UP	Ikzf1	down	1	1	0.0424015	0.0922499
GSE2706_LPS_VS_R848_AND_LPS_2H_STIM_DC_DN	Tubb2a	down	1	1	0.039963	0.0922499
GSE2706_2H_VS_8H_R848_STIM_DC_UP	Ephx1	down	1	1	0.0453157	0.0922499
GSE2706_2H_VS_8H_R848_STIM_DC_DN	Bcl2l11	down	1	1	0.0461617	0.0922499
GSE2706_2H_VS_8H_LPS_STIM_DC_DN	Tubb2a	down	1	1	0.0448949	0.0922499
GSE27786_LSK_VS_LIN_NEG_CELL_UP	Cd27	down	1	1	0.0478714	0.0922499
GSE27786_LSK_VS_CD4_TCELL_DN	Ikzf1	down	1	1	0.0483024	0.0922499
GSE27786_LSK_VS_NKTCELL_UP	Tmem158	down	1	1	0.0483024	0.0922499
GSE27786_LIN_NEG_VS_BCELL_UP	Ctsw	down	1	1	0.0483024	0.0922499
GSE27786_LIN_NEG_VS_BCELL_DN	Ikzf1	down	1	1	0.0483024	0.0922499
GSE27786_LIN_NEG_VS_CD8_TCELL_DN	Itm2a	down	1	1	0.0483024	0.0922499
GSE27786_LIN_NEG_VS_NKCELL_DN	Ikzf1	down	1	1	0.0483024	0.0922499
GSE27786_LIN_NEG_VS_NEUTROPHIL_UP	Gpr174	down	1	1	0.0483024	0.0922499
GSE27786_LIN_NEG_VS_MONO_MAC_UP	Pou2af1	down	1	1	0.0483024	0.0922499
GSE27786_BCELL_VS_CD4_TCELL_UP	Evi2b	down	1	1	0.0483024	0.0922499
GSE27786_BCELL_VS_NKCELL_UP	Dgka	down	1	1	0.0483024	0.0922499
GSE27786_BCELL_VS_NKCELL_DN	Tubb2a	down	1	1	0.0483024	0.0922499
GSE27786_CD4_TCELL_VS_NKTCELL_DN	Evi2b	down	1	1	0.0483024	0.0922499
GSE27786_CD4_TCELL_VS_ERYTHTROBLAST_UP	Ikzf1	down	1	1	0.0483024	0.0922499
GSE27786_CD8_TCELL_VS_NKCELL_UP	Tubb2b	down	1	1	0.0483024	0.0922499
GSE27786_CD8_TCELL_VS_NKTCELL_UP	Ephx1	down	1	1	0.0483024	0.0922499
GSE27786_CD8_TCELL_VS_ERYTHROBLAST_UP	Tubb2b	down	1	1	0.0483024	0.0922499
GSE27786_CD8_TCELL_VS_MONO_MAC_UP	Tubb2b	down	1	1	0.0474418	0.0922499
GSE27786_NKCELL_VS_MONO_MAC_DN	Evi2b	down	1	1	0.0483024	0.0922499
GSE27786_NKTCELL_VS_NEUTROPHIL_UP	S1pr1	down	1	1	0.0478714	0.0922499
GSE27786_ERYTHROBLAST_VS_NEUTROPHIL_UP	Nsg2	down	1	1	0.0483024	0.0922499
GSE27786_ERYTHROBLAST_VS_MONO_MAC_UP	Dck	down	1	1	0.0483024	0.0922499
GSE27786_ERYTHROBLAST_VS_MONO_MAC_DN	St8sia6	down	1	1	0.0478714	0.0922499
GSE2826_WT_VS_BTK_KO_BCELL_DN	Ugcg	down	1	1	0.0483024	0.0922499
GSE2826_XID_VS_BTK_KO_BCELL_DN	Ugcg	down	1	1	0.0483024	0.0922499
GSE29614_CTRL_VS_DAY7_TIV_FLU_VACCINE_PBMC_DN	Pou2af1	down	1	1	0.0453157	0.0922499
GSE29614_DAY3_VS_DAY7_TIV_FLU_VACCINE_PBMC_DN	Pou2af1	down	1	1	0.0436414	0.0922499
GSE29615_DAY3_VS_DAY7_LAIV_FLU_VACCINE_PBMC_UP	Ikzf1	down	1	1	0.0419912	0.0922499
GSE29617_CTRL_VS_TIV_FLU_VACCINE_PBMC_2008_DN	Dck	down	1	1	0.0470136	0.0922499
GSE29618_BCELL_VS_PDC_UP	Pou2af1	down	1	1	0.0461617	0.0922499
GSE29618_PDC_VS_MDC_DN	Bcl6	down	1	1	0.0478714	0.0922499
GSE29618_MONOCYTE_VS_PDC_DAY7_FLU_VACCINE_UP	Bcl6	down	1	1	0.0483024	0.0922499
GSE29618_PDC_VS_MDC_DAY7_FLU_VACCINE_DN	Bcl6	down	1	1	0.0483024	0.0922499
GSE29618_PRE_VS_DAY7_FLU_VACCINE_MONOCYTE_UP	Tmem158	down	1	1	0.0461617	0.0922499
GSE29618_PRE_VS_DAY7_FLU_VACCINE_PDC_DN	Dck	down	1	1	0.0483024	0.0922499
GSE29618_PRE_VS_DAY7_FLU_VACCINE_MDC_UP	Ugcg	down	1	1	0.0465869	0.0922499
GSE29618_PRE_VS_DAY7_FLU_VACCINE_MDC_DN	Dgka	down	1	1	0.0474418	0.0922499
GSE29618_PRE_VS_DAY7_POST_LAIV_FLU_VACCINE_PDC_UP	Lef1	down	1	1	0.0465869	0.0922499
GSE29618_PRE_VS_DAY7_POST_TIV_FLU_VACCINE_PDC_DN	Ikzf1	down	1	1	0.0483024	0.0922499
GSE29618_PRE_VS_DAY7_POST_LAIV_FLU_VACCINE_MDC_UP	Tmem158	down	1	1	0.0465869	0.0922499
GSE29618_PRE_VS_DAY7_POST_TIV_FLU_VACCINE_MDC_DN	Dgka	down	1	1	0.0474418	0.0922499
GSE29618_LAIV_VS_TIV_FLU_VACCINE_DAY7_MONOCYTE_DN	Acsbg1	down	1	1	0.0457379	0.0922499
GSE29618_LAIV_VS_TIV_FLU_VACCINE_DAY7_MDC_UP	Ikzf1	down	1	1	0.0474418	0.0922499
GSE30083_SP1_VS_SP2_THYMOCYTE_DN	St8sia6	down	1	1	0.0483024	0.0922499
GSE30962_PRIMARY_VS_SECONDARY_CHRONIC_LCMV_INF_CD8_TCELL_DN	Gpr34	down	1	1	0.0483024	0.0922499
GSE30962_ACUTE_VS_CHRONIC_LCMV_PRIMARY_INF_CD8_TCELL_DN	Itm2a	down	1	1	0.0483024	0.0922499
GSE30962_ACUTE_VS_CHRONIC_LCMV_SECONDARY_INF_CD8_TCELL_DN	Stmn1	down	1	1	0.0483024	0.0922499
GSE31082_DN_VS_CD4_SP_THYMOCYTE_DN	B4galnt1	down	1	1	0.0483024	0.0922499
GSE31082_DP_VS_CD4_SP_THYMOCYTE_DN	Sell	down	1	1	0.0478714	0.0922499
GSE31082_CD4_VS_CD8_SP_THYMOCYTE_UP	Sytl2	down	1	1	0.0483024	0.0922499
GSE32423_MEMORY_VS_NAIVE_CD8_TCELL_UP	Acsbg1	down	1	1	0.0483024	0.0922499
GSE32423_CTRL_VS_IL7_MEMORY_CD8_TCELL_DN	Gpr34	down	1	1	0.0474418	0.0922499
GSE32423_IL7_VS_IL4_MEMORY_CD8_TCELL_UP	Acsbg1	down	1	1	0.0483024	0.0922499
GSE3337_CTRL_VS_4H_IFNG_IN_CD8POS_DC_UP	Tcf7	down	1	1	0.0483024	0.0922499
GSE339_CD4POS_VS_CD8POS_DC_DN	Tubb2a	down	1	1	0.0483024	0.0922499
GSE339_CD4POS_VS_CD4CD8DN_DC_UP	Sesn1	down	1	1	0.0483024	0.0922499
GSE339_CD8POS_VS_CD4CD8DN_DC_UP	Tubb2a	down	1	1	0.0483024	0.0922499
GSE339_CD4POS_VS_CD8POS_DC_IN_CULTURE_DN	Bcl2l11	down	1	1	0.0483024	0.0922499
GSE339_CD8POS_VS_CD4CD8DN_DC_IN_CULTURE_DN	B4galnt1	down	1	1	0.0483024	0.0922499
GSE339_EX_VIVO_VS_IN_CULTURE_CD4POS_DC_UP	B4galnt1	down	1	1	0.0483024	0.0922499
GSE339_EX_VIVO_VS_IN_CULTURE_CD8POS_DC_UP	Itm2a	down	1	1	0.0483024	0.0922499
GSE339_EX_VIVO_VS_IN_CULTURE_CD8POS_DC_DN	Bcl2l11	down	1	1	0.0483024	0.0922499
GSE339_EX_VIVO_VS_IN_CULTURE_CD4CD8DN_DC_UP	Ikzf1	down	1	1	0.0483024	0.0922499
GSE339_EX_VIVO_VS_IN_CULTURE_CD4CD8DN_DC_DN	Bcl2l11	down	1	1	0.0483024	0.0922499
GSE360_CTRL_VS_M_TUBERCULOSIS_DC_UP	Evi2b	down	1	1	0.0483024	0.0922499
GSE360_CTRL_VS_M_TUBERCULOSIS_DC_DN	Tubb2a	down	1	1	0.0483024	0.0922499
GSE360_CTRL_VS_L_MAJOR_MAC_UP	Tubb2a	down	1	1	0.0483024	0.0922499
GSE360_CTRL_VS_L_MAJOR_MAC_DN	Cd27	down	1	1	0.0470136	0.0922499
GSE360_CTRL_VS_T_GONDII_MAC_DN	Ikzf1	down	1	1	0.0474418	0.0922499
GSE360_CTRL_VS_B_MALAYI_HIGH_DOSE_MAC_DN	Cd27	down	1	1	0.0483024	0.0922499
GSE360_CTRL_VS_B_MALAYI_LOW_DOSE_MAC_DN	Dgka	down	1	1	0.0478714	0.0922499
GSE360_DC_VS_MAC_UP	Bcl6	down	1	1	0.0483024	0.0922499
GSE360_DC_VS_MAC_DN	Ugcg	down	1	1	0.0474418	0.0922499
GSE360_DC_VS_MAC_T_GONDII_UP	B4galnt1	down	1	1	0.0474418	0.0922499
GSE360_DC_VS_MAC_B_MALAYI_LOW_DOSE_UP	Tmem158	down	1	1	0.0478714	0.0922499
GSE360_DC_VS_MAC_M_TUBERCULOSIS_DN	Lmo4	down	1	1	0.0483024	0.0922499
GSE360_L_DONOVANI_VS_T_GONDII_DC_UP	Acsbg1	down	1	1	0.0483024	0.0922499
GSE360_L_DONOVANI_VS_B_MALAYI_LOW_DOSE_DC_DN	Cd27	down	1	1	0.0478714	0.0922499
GSE360_L_MAJOR_VS_B_MALAYI_HIGH_DOSE_DC_UP	Ugcg	down	1	1	0.0483024	0.0922499
GSE360_L_MAJOR_VS_B_MALAYI_LOW_DOSE_DC_UP	Sell	down	1	1	0.0483024	0.0922499
GSE360_L_MAJOR_VS_B_MALAYI_LOW_DOSE_DC_DN	B4galnt1	down	1	1	0.0483024	0.0922499
GSE360_T_GONDII_VS_B_MALAYI_HIGH_DOSE_DC_UP	B4galnt1	down	1	1	0.0474418	0.0922499
GSE360_T_GONDII_VS_B_MALAYI_LOW_DOSE_DC_UP	Tubb2a	down	1	1	0.0474418	0.0922499
GSE360_HIGH_DOSE_B_MALAYI_VS_M_TUBERCULOSIS_DC_DN	Tubb2a	down	1	1	0.0478714	0.0922499
GSE360_LOW_DOSE_B_MALAYI_VS_M_TUBERCULOSIS_DC_UP	Tmem158	down	1	1	0.0483024	0.0922499
GSE360_L_DONOVANI_VS_L_MAJOR_MAC_DN	Cd27	down	1	1	0.0483024	0.0922499
GSE360_L_DONOVANI_VS_T_GONDII_MAC_UP	Cpm	down	1	1	0.0483024	0.0922499
GSE360_L_DONOVANI_VS_B_MALAYI_LOW_DOSE_MAC_UP	Cpm	down	1	1	0.0478714	0.0922499
GSE360_L_DONOVANI_VS_B_MALAYI_LOW_DOSE_MAC_DN	Lmo4	down	1	1	0.0478714	0.0922499
GSE360_L_MAJOR_VS_T_GONDII_MAC_UP	Pou2af1	down	1	1	0.0470136	0.0922499
GSE360_L_MAJOR_VS_B_MALAYI_HIGH_DOSE_MAC_DN	Cd27	down	1	1	0.0478714	0.0922499
GSE360_L_MAJOR_VS_B_MALAYI_LOW_DOSE_MAC_DN	Tubb2a	down	1	1	0.0478714	0.0922499
GSE360_L_MAJOR_VS_M_TUBERCULOSIS_MAC_UP	Pou2af1	down	1	1	0.0465869	0.0922499
GSE360_T_GONDII_VS_B_MALAYI_LOW_DOSE_MAC_UP	Cpm	down	1	1	0.0465869	0.0922499
GSE36392_TYPE_2_MYELOID_VS_EOSINOPHIL_IL25_TREATED_LUNG_DN	Bcl2l11	down	1	1	0.0483024	0.0922499
GSE36392_EOSINOPHIL_VS_NEUTROPHIL_IL25_TREATED_LUNG_UP	Bcl6	down	1	1	0.0483024	0.0922499
GSE36392_MAC_VS_NEUTROPHIL_IL25_TREATED_LUNG_UP	St8sia6	down	1	1	0.0483024	0.0922499
GSE36476_CTRL_VS_TSST_ACT_40H_MEMORY_CD4_TCELL_YOUNG_DN	Stmn1	down	1	1	0.0483024	0.0922499
GSE36476_CTRL_VS_TSST_ACT_72H_MEMORY_CD4_TCELL_YOUNG_DN	Stmn1	down	1	1	0.0478714	0.0922499
GSE36476_CTRL_VS_TSST_ACT_16H_MEMORY_CD4_TCELL_OLD_DN	Tubb2b	down	1	1	0.0483024	0.0922499
GSE36476_CTRL_VS_TSST_ACT_72H_MEMORY_CD4_TCELL_OLD_UP	Lef1	down	1	1	0.0470136	0.0922499
GSE36476_YOUNG_VS_OLD_DONOR_MEMORY_CD4_TCELL_72H_TSST_ACT_DN	Bcl6	down	1	1	0.0470136	0.0922499
GSE37416_CTRL_VS_0H_F_TULARENSIS_LVS_NEUTROPHIL_DN	Sell	down	1	1	0.0424015	0.0922499
GSE37416_CTRL_VS_3H_F_TULARENSIS_LVS_NEUTROPHIL_UP	Sell	down	1	1	0.0436414	0.0922499
GSE37416_CTRL_VS_24H_F_TULARENSIS_LVS_NEUTROPHIL_UP	Sell	down	1	1	0.0453157	0.0922499
GSE37416_CTRL_VS_48H_F_TULARENSIS_LVS_NEUTROPHIL_UP	Tcf7	down	1	1	0.0448949	0.0922499
GSE37416_0H_VS_24H_F_TULARENSIS_LVS_NEUTROPHIL_UP	Lmo4	down	1	1	0.0465869	0.0922499
GSE37416_0H_VS_24H_F_TULARENSIS_LVS_NEUTROPHIL_DN	Dgka	down	1	1	0.0478714	0.0922499
GSE37416_12H_VS_24H_F_TULARENSIS_LVS_NEUTROPHIL_UP	Sell	down	1	1	0.0474418	0.0922499
GSE37416_12H_VS_48H_F_TULARENSIS_LVS_NEUTROPHIL_DN	Stmn1	down	1	1	0.0428133	0.0922499
GSE3982_CTRL_VS_PMA_STIM_EOSINOPHIL_DN	Sell	down	1	1	0.0483024	0.0922499
GSE3982_CTRL_VS_IGE_STIM_MAST_CELL_UP	Evi2b	down	1	1	0.0478714	0.0922499
GSE3982_MEMORY_CD4_TCELL_VS_TH1_UP	Tcf7	down	1	1	0.0470136	0.0922499
GSE3982_MEMORY_CD4_TCELL_VS_TH2_UP	Sesn1	down	1	1	0.0465869	0.0922499
GSE3982_MEMORY_CD4_TCELL_VS_BCELL_UP	Gpr171	down	1	1	0.0478714	0.0922499
GSE3982_MEMORY_CD4_TCELL_VS_BCELL_DN	Pou2af1	down	1	1	0.0470136	0.0922499
GSE3982_DC_VS_MAC_LPS_STIM_DN	Sytl2	down	1	1	0.0478714	0.0922499
GSE3982_MAC_VS_NEUTROPHIL_LPS_STIM_DN	Tcf7	down	1	1	0.0465869	0.0922499
GSE3982_EOSINOPHIL_VS_MAST_CELL_UP	S1pr1	down	1	1	0.0478714	0.0922499
GSE3982_EOSINOPHIL_VS_DC_UP	S1pr1	down	1	1	0.0478714	0.0922499
GSE3982_EOSINOPHIL_VS_DC_DN	Sesn1	down	1	1	0.0483024	0.0922499
GSE3982_EOSINOPHIL_VS_MAC_UP	Acsbg1	down	1	1	0.0465869	0.0922499
GSE3982_EOSINOPHIL_VS_MAC_DN	Ephx1	down	1	1	0.0478714	0.0922499
GSE3982_EOSINOPHIL_VS_NEUTROPHIL_UP	S1pr1	down	1	1	0.0478714	0.0922499
GSE3982_EOSINOPHIL_VS_BCELL_UP	Acsbg1	down	1	1	0.0478714	0.0922499
GSE3982_EOSINOPHIL_VS_BASOPHIL_UP	Sytl2	down	1	1	0.0465869	0.0922499
GSE3982_EOSINOPHIL_VS_EFF_MEMORY_CD4_TCELL_DN	Sesn1	down	1	1	0.0470136	0.0922499
GSE3982_EOSINOPHIL_VS_CENT_MEMORY_CD4_TCELL_DN	Sesn1	down	1	1	0.0470136	0.0922499
GSE3982_MAST_CELL_VS_NEUTROPHIL_DN	Bcl6	down	1	1	0.0470136	0.0922499
GSE3982_MAST_CELL_VS_BASOPHIL_UP	Tubb2a	down	1	1	0.0470136	0.0922499
GSE3982_MAST_CELL_VS_NKCELL_UP	Lmo4	down	1	1	0.0483024	0.0922499
GSE3982_MAST_CELL_VS_NKCELL_DN	Ctsw	down	1	1	0.0478714	0.0922499
GSE3982_MAST_CELL_VS_TH2_UP	Tubb2a	down	1	1	0.0474418	0.0922499
GSE3982_DC_VS_BASOPHIL_DN	S1pr1	down	1	1	0.0478714	0.0922499
GSE3982_DC_VS_CENT_MEMORY_CD4_TCELL_DN	S1pr1	down	1	1	0.0483024	0.0922499
GSE3982_DC_VS_NKCELL_DN	Sell	down	1	1	0.0470136	0.0922499
GSE3982_DC_VS_TH2_UP	Sesn1	down	1	1	0.0483024	0.0922499
GSE3982_MAC_VS_BASOPHIL_DN	Gpr171	down	1	1	0.0470136	0.0922499
GSE3982_MAC_VS_CENT_MEMORY_CD4_TCELL_DN	Ikzf1	down	1	1	0.0461617	0.0922499
GSE3982_MAC_VS_NKCELL_UP	Cpm	down	1	1	0.0483024	0.0922499
GSE3982_MAC_VS_NKCELL_DN	Gpr171	down	1	1	0.0474418	0.0922499
GSE3982_MAC_VS_TH2_UP	Ephx1	down	1	1	0.0478714	0.0922499
GSE3982_NEUTROPHIL_VS_BASOPHIL_DN	S1pr1	down	1	1	0.0483024	0.0922499
GSE3982_NEUTROPHIL_VS_EFF_MEMORY_CD4_TCELL_UP	Bcl6	down	1	1	0.0478714	0.0922499
GSE3982_NEUTROPHIL_VS_EFF_MEMORY_CD4_TCELL_DN	S1pr1	down	1	1	0.0478714	0.0922499
GSE3982_NEUTROPHIL_VS_CENT_MEMORY_CD4_TCELL_UP	Bcl6	down	1	1	0.0483024	0.0922499
GSE3982_NEUTROPHIL_VS_CENT_MEMORY_CD4_TCELL_DN	S1pr1	down	1	1	0.0483024	0.0922499
GSE3982_NEUTROPHIL_VS_NKCELL_DN	S1pr1	down	1	1	0.0478714	0.0922499
GSE3982_NEUTROPHIL_VS_TH2_UP	Evi2b	down	1	1	0.0483024	0.0922499
GSE3982_BCELL_VS_BASOPHIL_UP	Prg4	down	1	1	0.0478714	0.0922499
GSE3982_BCELL_VS_BASOPHIL_DN	Tubb2b	down	1	1	0.0483024	0.0922499
GSE3982_BCELL_VS_EFF_MEMORY_CD4_TCELL_UP	Ephx1	down	1	1	0.0474418	0.0922499
GSE3982_BCELL_VS_CENT_MEMORY_CD4_TCELL_DN	Tcf7	down	1	1	0.0474418	0.0922499
GSE3982_BCELL_VS_NKCELL_UP	Bcl6	down	1	1	0.0470136	0.0922499
GSE3982_BCELL_VS_NKCELL_DN	Itm2a	down	1	1	0.0470136	0.0922499
GSE3982_BCELL_VS_TH1_UP	Tubb2b	down	1	1	0.0474418	0.0922499
GSE3982_BCELL_VS_TH1_DN	Itm2a	down	1	1	0.0474418	0.0922499
GSE3982_BCELL_VS_TH2_UP	Tcf7	down	1	1	0.0470136	0.0922499
GSE3982_BASOPHIL_VS_CENT_MEMORY_CD4_TCELL_UP	Evi2b	down	1	1	0.0478714	0.0922499
GSE3982_BASOPHIL_VS_CENT_MEMORY_CD4_TCELL_DN	Gpr171	down	1	1	0.0483024	0.0922499
GSE3982_BASOPHIL_VS_NKCELL_DN	Tubb2b	down	1	1	0.0470136	0.0922499
GSE3982_BASOPHIL_VS_TH1_UP	Bcl6	down	1	1	0.0478714	0.0922499
GSE3982_BASOPHIL_VS_TH2_UP	Bcl6	down	1	1	0.0483024	0.0922499
GSE3982_EFF_MEMORY_VS_CENT_MEMORY_CD4_TCELL_DN	Sell	down	1	1	0.0470136	0.0922499
GSE3982_CENT_MEMORY_CD4_TCELL_VS_NKCELL_UP	Dgka	down	1	1	0.0470136	0.0922499
GSE3982_CENT_MEMORY_CD4_TCELL_VS_TH1_UP	Tcf7	down	1	1	0.0474418	0.0922499
GSE3982_CENT_MEMORY_CD4_TCELL_VS_TH1_DN	Stmn1	down	1	1	0.0478714	0.0922499
GSE3982_NKCELL_VS_TH2_DN	Gpr171	down	1	1	0.0478714	0.0922499
GSE39820_CTRL_VS_IL1B_IL6_IL23A_CD4_TCELL_DN	Gpr171	down	1	1	0.0483024	0.0922499
GSE39820_CTRL_VS_TGFBETA1_IL6_CD4_TCELL_DN	Acsbg1	down	1	1	0.0483024	0.0922499
GSE39820_CTRL_VS_TGFBETA3_IL6_CD4_TCELL_UP	Gpr34	down	1	1	0.0483024	0.0922499
GSE39820_CTRL_VS_TGFBETA3_IL6_IL23A_CD4_TCELL_UP	Sesn1	down	1	1	0.0483024	0.0922499
GSE39820_IL1B_IL6_VS_IL1B_IL6_IL23A_TREATED_CD4_TCELL_UP	St8sia6	down	1	1	0.0483024	0.0922499
GSE39820_IL1B_IL6_VS_IL1B_IL6_IL23A_TREATED_CD4_TCELL_DN	S1pr1	down	1	1	0.0483024	0.0922499
GSE39820_TGFBETA1_IL6_VS_TGFBETA1_IL6_IL23A_TREATED_CD4_TCELL_UP	Ctsw	down	1	1	0.0483024	0.0922499
GSE39820_TGFBETA3_IL6_VS_TGFBETA3_IL6_IL23A_TREATED_CD4_TCELL_UP	Ugcg	down	1	1	0.0478714	0.0922499
GSE39820_TGFBETA1_VS_TGFBETA3_IN_IL6_TREATED_CD4_TCELL_UP	Dck	down	1	1	0.0483024	0.0922499
GSE39820_TGFBETA1_VS_TGFBETA3_IN_IL6_IL23A_TREATED_CD4_TCELL_DN	Cd27	down	1	1	0.0478714	0.0922499
GSE5960_TH1_VS_ANERGIC_TH1_UP	Sesn1	down	1	1	0.0483024	0.0922499
GSE6269_FLU_VS_STAPH_AUREUS_INF_PBMC_UP	Cd27	down	1	1	0.0411753	0.0922499
GSE6269_FLU_VS_E_COLI_INF_PBMC_DN	Acsbg1	down	1	1	0.0318807	0.0922499
GSE6269_HEALTHY_VS_STAPH_AUREUS_INF_PBMC_UP	Gpr171	down	1	1	0.0360246	0.0922499
GSE6269_HEALTHY_VS_STAPH_AUREUS_INF_PBMC_DN	Acsbg1	down	1	1	0.0387648	0.0922499
GSE6269_FLU_VS_STREP_PNEUMO_INF_PBMC_DN	Acsbg1	down	1	1	0.0367995	0.0922499
GSE6269_E_COLI_VS_STAPH_AUREUS_INF_PBMC_UP	Itm2a	down	1	1	0.0307859	0.0922499
GSE6269_E_COLI_VS_STREP_PNEUMO_INF_PBMC_UP	Itm2a	down	1	1	0.0352563	0.0922499
GSE6269_E_COLI_VS_STREP_PNEUMO_INF_PBMC_DN	Ugcg	down	1	1	0.0352563	0.0922499
GSE6269_STAPH_AUREUS_VS_STREP_PNEUMO_INF_PBMC_DN	Ugcg	down	1	1	0.0403655	0.0922499
GSE7460_TCONV_VS_TREG_THYMUS_DN	Sh3bgrl2	down	1	1	0.0483024	0.0922499
GSE7460_CTRL_VS_TGFB_TREATED_ACT_CD8_TCELL_UP	Dapl1	down	1	1	0.0483024	0.0922499
GSE7460_CD8_TCELL_VS_CD4_TCELL_ACT_DN	Sh3bgrl2	down	1	1	0.0483024	0.0922499
GSE7460_TREG_VS_TCONV_ACT_UP	Tubb2b	down	1	1	0.0483024	0.0922499
GSE7460_TREG_VS_TCONV_ACT_DN	Dapl1	down	1	1	0.0474418	0.0922499
GSE7460_CTRL_VS_TGFB_TREATED_ACT_FOXP3_HET_TCONV_DN	Ctsw	down	1	1	0.0483024	0.0922499
GSE7460_CTRL_VS_TGFB_TREATED_ACT_FOXP3_MUT_TCONV_DN	Ctsw	down	1	1	0.0483024	0.0922499
GSE7460_FOXP3_MUT_VS_WT_ACT_TCONV_UP	Gpr171	down	1	1	0.0483024	0.0922499
GSE7460_FOXP3_MUT_VS_WT_ACT_WITH_TGFB_TCONV_UP	B4galnt1	down	1	1	0.0483024	0.0922499
GSE7460_FOXP3_MUT_VS_HET_ACT_TCONV_UP	Gpr171	down	1	1	0.0483024	0.0922499
GSE7764_IL15_NK_CELL_24H_VS_SPLENOCYTE_UP	Stmn1	down	1	1	0.0483024	0.0922499
GSE7852_TREG_VS_TCONV_THYMUS_UP	Sh3bgrl2	down	1	1	0.0483024	0.0922499
GSE8515_CTRL_VS_IL1_4H_STIM_MAC_UP	Sesn1	down	1	1	0.0478714	0.0922499
GSE8515_CTRL_VS_IL1_4H_STIM_MAC_DN	Gpr171	down	1	1	0.0461617	0.0922499
GSE8515_IL1_VS_IL6_4H_STIM_MAC_UP	Gpr171	down	1	1	0.0483024	0.0922499
GSE9006_HEALTHY_VS_TYPE_1_DIABETES_PBMC_1MONTH_POST_DX_UP	Ugcg	down	1	1	0.0483024	0.0922499
GSE9006_HEALTHY_VS_TYPE_1_DIABETES_PBMC_4MONTH_POST_DX_DN	Gpr171	down	1	1	0.0470136	0.0922499
GSE9006_TYPE_1_DIABETES_AT_DX_VS_1MONTH_POST_DX_PBMC_DN	Gpr171	down	1	1	0.0461617	0.0922499
GSE9006_TYPE_1_DIABETES_AT_DX_VS_4MONTH_POST_DX_PBMC_UP	Bcl6	down	1	1	0.0483024	0.0922499
GSE9006_1MONTH_VS_4MONTH_POST_TYPE_1_DIABETES_DX_PBMC_UP	Bcl6	down	1	1	0.0465869	0.0922499
GSE9006_1MONTH_VS_4MONTH_POST_TYPE_1_DIABETES_DX_PBMC_DN	S1pr1	down	1	1	0.0457379	0.0922499
GSE9037_CTRL_VS_LPS_4H_STIM_BMDM_DN	Cd27	down	1	1	0.0483024	0.0922499
GSE9037_CTRL_VS_LPS_1H_STIM_IRAK4_KO_BMDM_UP	Cd27	down	1	1	0.0483024	0.0922499
GSE9037_CTRL_VS_LPS_4H_STIM_IRAK4_KO_BMDM_UP	S1pr1	down	1	1	0.0483024	0.0922499
GSE9037_WT_VS_IRAK4_KO_BMDM_DN	Cd27	down	1	1	0.0483024	0.0922499
GSE9037_WT_VS_IRAK4_KO_LPS_1H_STIM_BMDM_DN	Itm2a	down	1	1	0.0483024	0.0922499
GSE9650_EXHAUSTED_VS_MEMORY_CD8_TCELL_UP	Bcl2l11	down	1	1	0.0483024	0.0922499
GSE9988_LPS_VS_LPS_AND_ANTI_TREM1_MONOCYTE_UP	Ikzf1	down	1	1	0.0474418	0.0922499
GSE9988_LPS_VS_CTRL_TREATED_MONOCYTE_DN	Evi2b	down	1	1	0.0483024	0.0922499
GSE9988_ANTI_TREM1_AND_LPS_VS_CTRL_TREATED_MONOCYTES_DN	Evi2b	down	1	1	0.0470136	0.0922499
GSE369_SOCS3_KO_VS_WT_LIVER_POST_IL6_INJECTION_UP	Ephx1	down	1	1	0.0474418	0.0922499
GSE369_SOCS3_KO_VS_IFNG_KO_LIVER_UP	Ctsw	down	1	1	0.0478714	0.0922499
GSE411_WT_VS_SOCS3_KO_MACROPHAGE_DN	S1pr1	down	1	1	0.0483024	0.0922499
GSE411_100MIN_VS_400MIN_IL6_STIM_SOCS3_KO_MACROPHAGE_DN	Cpm	down	1	1	0.0483024	0.0922499
GSE411_100MIN_VS_400MIN_IL6_STIM_MACROPHAGE_UP	S1pr1	down	1	1	0.0483024	0.0922499
GSE411_UNSTIM_VS_400MIN_IL6_STIM_MACROPHAGE_UP	Nsg2	down	1	1	0.0483024	0.0922499
GSE411_UNSTIM_VS_400MIN_IL6_STIM_SOCS3_KO_MACROPHAGE_UP	Nsg2	down	1	1	0.0478714	0.0922499
GSE411_100MIN_VS_400MIN_IL6_STIM_SOCS3_KO_MACROPHAGE_UP	Lmo4	down	1	1	0.0483024	0.0922499
GSE557_WT_VS_CIITA_KO_DC_DN	Cpm	down	1	1	0.0478714	0.0922499
GSE2770_IL12_VS_TGFB_AND_IL12_TREATED_ACT_CD4_TCELL_48H_DN	Sh3bgrl2	down	1	1	0.0483024	0.0922499
GSE2770_IL12_VS_IL4_TREATED_ACT_CD4_TCELL_48H_UP	Lmo4	down	1	1	0.0483024	0.0922499
GSE2770_IL12_AND_TGFB_VS_IL4_TREATED_ACT_CD4_TCELL_48H_UP	S1pr1	down	1	1	0.0483024	0.0922499
GSE2770_UNTREATED_VS_IL4_TREATED_ACT_CD4_TCELL_2H_DN	Lmo4	down	1	1	0.0483024	0.0922499
GSE2770_IL4_ACT_VS_ACT_CD4_TCELL_48H_DN	Stmn1	down	1	1	0.0478714	0.0922499
GSE2770_UNTREATED_VS_IL12_TREATED_ACT_CD4_TCELL_48H_UP	Ikzf1	down	1	1	0.0483024	0.0922499
GSE2770_UNTREATED_VS_TGFB_AND_IL12_TREATED_ACT_CD4_TCELL_2H_UP	Tmem158	down	1	1	0.0478714	0.0922499
GSE2770_UNTREATED_VS_TGFB_AND_IL12_TREATED_ACT_CD4_TCELL_6H_UP	Pou2af1	down	1	1	0.0483024	0.0922499
GSE2770_UNTREATED_VS_TGFB_AND_IL12_TREATED_ACT_CD4_TCELL_6H_DN	Gpr171	down	1	1	0.0483024	0.0922499
GSE2770_IL12_VS_IL4_TREATED_ACT_CD4_TCELL_6H_DN	St8sia6	down	1	1	0.0483024	0.0922499
GSE2770_IL12_ACT_VS_ACT_CD4_TCELL_6H_UP	Lmo4	down	1	1	0.0465869	0.0922499
GSE2770_IL12_AND_TGFB_ACT_VS_ACT_CD4_TCELL_6H_UP	Tcf7	down	1	1	0.0478714	0.0922499
GSE2770_UNTREATED_VS_ACT_CD4_TCELL_48H_DN	Bcl6	down	1	1	0.0448949	0.0922499
GSE2770_TGFB_AND_IL4_VS_IL12_TREATED_ACT_CD4_TCELL_2H_DN	Tubb2a	down	1	1	0.0470136	0.0922499
GSE2770_TGFB_AND_IL4_ACT_VS_ACT_CD4_TCELL_2H_UP	Itm2a	down	1	1	0.0465869	0.0922499
GSE2770_TGFB_AND_IL4_ACT_VS_ACT_CD4_TCELL_2H_DN	Tubb2a	down	1	1	0.0457379	0.0922499
GSE2770_IL12_VS_TGFB_AND_IL12_TREATED_ACT_CD4_TCELL_2H_UP	Ctsw	down	1	1	0.0360246	0.0922499
GSE2770_IL12_VS_TGFB_AND_IL12_TREATED_ACT_CD4_TCELL_2H_DN	St8sia6	down	1	1	0.039963	0.0922499
GSE2770_IL12_VS_IL4_TREATED_ACT_CD4_TCELL_2H_UP	Lmo4	down	1	1	0.0360246	0.0922499
GSE2770_UNTREATED_VS_TGFB_AND_IL4_TREATED_ACT_CD4_TCELL_4H_DN	B4galnt1	down	1	1	0.0364112	0.0922499
GSE2770_UNTREATED_VS_TGFB_AND_IL4_TREATED_ACT_CD4_TCELL_48H_DN	Tubb2b	down	1	1	0.0474418	0.0922499
GSE2770_UNTREATED_VS_IL12_TREATED_ACT_CD4_TCELL_2H_UP	Evi2b	down	1	1	0.0483024	0.0922499
GSE2770_UNTREATED_VS_IL12_TREATED_ACT_CD4_TCELL_2H_DN	Cpm	down	1	1	0.0483024	0.0922499
GSE2770_UNTREATED_VS_IL12_TREATED_ACT_CD4_TCELL_6H_UP	Lmo4	down	1	1	0.0483024	0.0922499
GSE2770_IL4_ACT_VS_ACT_CD4_TCELL_2H_UP	Tubb2b	down	1	1	0.0483024	0.0922499
GSE2770_TGFB_AND_IL4_VS_IL4_TREATED_ACT_CD4_TCELL_6H_UP	Tcf7	down	1	1	0.0457379	0.0922499
GSE2770_TGFB_AND_IL4_ACT_VS_ACT_CD4_TCELL_48H_UP	Cpm	down	1	1	0.0483024	0.0922499
GSE2770_TGFB_AND_IL4_ACT_VS_ACT_CD4_TCELL_48H_DN	Bcl6	down	1	1	0.0474418	0.0922499
GSE2770_TGFB_AND_IL4_VS_IL12_TREATED_ACT_CD4_TCELL_48H_UP	Bcl2l11	down	1	1	0.0474418	0.0922499
GSE2770_IL12_AND_TGFB_VS_IL4_TREATED_ACT_CD4_TCELL_48H_DN	Gpr174	down	1	1	0.0453157	0.0922499
GSE2770_IL12_ACT_VS_ACT_CD4_TCELL_2H_UP	Cpm	down	1	1	0.0444755	0.0922499
GSE2770_IL12_AND_TGFB_ACT_VS_ACT_CD4_TCELL_48H_UP	Ephx1	down	1	1	0.0474418	0.0922499
GSE1112_HY_CD8AB_VS_HY_CD8AA_THYMOCYTE_RTOC_CULTURE_DN	Bcl6	down	1	1	0.0440577	0.0922499
GSE1112_OT1_VS_HY_CD8AB_THYMOCYTE_RTOC_CULTURE_UP	Ephx1	down	1	1	0.0483024	0.0922499
GSE1112_OT1_CD8AB_VS_HY_CD8AA_THYMOCYTE_RTOC_CULTURE_DN	Gpr174	down	1	1	0.0457379	0.0922499
GSE1112_OT1_VS_HY_CD8AB_THYMOCYTE_RTOC_CULTURE_DN	Ephx1	down	1	1	0.0483024	0.0922499
GSE1740_UNSTIM_VS_IFNA_STIMULATED_MCSF_DERIVED_MACROPHAGE_DN	Gpr174	down	1	1	0.0444755	0.0922499
GSE1740_MCSF_VS_MCSF_AND_IFNG_DAY2_DERIVED_MACROPHAGE_WITH_IFNA_STIM_UP	Ephx1	down	1	1	0.0483024	0.0922499
GSE1791_CTRL_VS_NEUROMEDINU_IN_T_CELL_LINE_3H_DN	Bcl2l11	down	1	1	0.0457379	0.0922499
GSE1791_CTRL_VS_NEUROMEDINU_IN_T_CELL_LINE_0.8H_UP	B4galnt1	down	1	1	0.0470136	0.0922499
GSE2128_C57BL6_VS_NOD_THYMOCYTE_MIMETOPE_NEGATIVE_SELECTION_DN	Ikzf1	down	1	1	0.0474418	0.0922499
GSE2128_C57BL6_VS_NOD_THYMOCYTE_UP	Ugcg	down	1	1	0.0483024	0.0922499
GSE2128_CTRL_VS_MIMETOPE_NEGATIVE_SELECTION_DP_THYMOCYTE_C57BL6_DN	Sell	down	1	1	0.0483024	0.0922499
GSE2128_CTRL_VS_MIMETOPE_NEGATIVE_SELECTION_DP_THYMOCYTE_NOD_UP	Bcl2l11	down	1	1	0.0483024	0.0922499
GSE2128_C57BL6_VS_NOD_THYMOCYTE_DN	Dapl1	down	1	1	0.0483024	0.0922499
GSE2124_CTRL_VS_LYMPHOTOXIN_BETA_TREATED_MLN_UP	Ikzf1	down	1	1	0.0474418	0.0922499
GSE2405_S_AUREUS_VS_UNTREATED_NEUTROPHIL_UP	Gpr171	down	1	1	0.0478714	0.0922499
GSE2405_HEAT_KILLED_VS_LIVE_A_PHAGOCYTOPHILUM_STIM_NEUTROPHIL_9H_UP	Bcl2l11	down	1	1	0.0483024	0.0922499
GSE2405_0H_VS_9H_A_PHAGOCYTOPHILUM_STIM_NEUTROPHIL_DN	Stmn1	down	1	1	0.0483024	0.0922499
GSE2405_S_AUREUS_VS_A_PHAGOCYTOPHILUM_NEUTROPHIL_DN	B4galnt1	down	1	1	0.0478714	0.0922499
GSE2405_0H_VS_9H_A_PHAGOCYTOPHILUM_STIM_NEUTROPHIL_UP	Tubb2a	down	1	1	0.0474418	0.0922499
GSE22601_DOUBLE_POSITIVE_VS_CD4_SINGLE_POSITIVE_THYMOCYTE_UP	Tubb2a	down	1	1	0.0470136	0.0922499
GSE22601_DOUBLE_NEGATIVE_VS_IMMATURE_CD4_SP_THYMOCYTE_UP	S1pr1	down	1	1	0.0483024	0.0922499
GSE22601_IMMATURE_CD4_SINGLE_POSITIVE_VS_CD4_SINGLE_POSITIVE_THYMOCYTE_DN	Tubb2a	down	1	1	0.0483024	0.0922499
GSE22601_IMMATURE_CD4_SINGLE_POSITIVE_VS_CD8_SINGLE_POSITIVE_THYMOCYTE_DN	Bcl2l11	down	1	1	0.0483024	0.0922499
GSE22601_DOUBLE_POSITIVE_VS_CD4_SINGLE_POSITIVE_THYMOCYTE_DN	Itm2a	down	1	1	0.0483024	0.0922499
GSE8835_CD4_VS_CD8_TCELL_DN	Gpr171	down	1	1	0.0474418	0.0922499
GSE8835_CD4_VS_CD8_TCELL_CLL_PATIENT_UP	Sell	down	1	1	0.0483024	0.0922499
GSE8835_HEALTHY_VS_CLL_CD8_TCELL_UP	Evi2b	down	1	1	0.0483024	0.0922499
GSE2585_AIRE_KO_VS_WT_CD80_HIGH_MTEC_UP	Cd27	down	1	1	0.0483024	0.0922499
GSE2585_THYMIC_DC_VS_THYMIC_MACROPHAGE_UP	Acsbg1	down	1	1	0.0444755	0.0922499
GSE2585_THYMIC_DC_VS_MTEC_UP	S1pr1	down	1	1	0.0478714	0.0922499
GSE1925_CTRL_VS_3H_IFNG_STIM_MACROPHAGE_DN	Tmem158	down	1	1	0.0470136	0.0922499
GSE1925_CTRL_VS_24H_IFNG_STIM_MACROPHAGE_UP	Cd27	down	1	1	0.0465869	0.0922499
GSE1925_CTRL_VS_3H_IFNG_STIM_IFNG_PRIMED_MACROPHAGE_UP	Gpr174	down	1	1	0.0448949	0.0922499
GSE1925_CTRL_VS_24H_IFNG_STIM_IFNG_PRIMED_MACROPHAGE_DN	Sell	down	1	1	0.0483024	0.0922499
GSE1925_3H_VS_24H_IFNG_STIM_IFNG_PRIMED_MACROPHAGE_UP	Lmo4	down	1	1	0.0483024	0.0922499
GSE1925_3H_VS_24H_IFNG_STIM_IFNG_PRIMED_MACROPHAGE_DN	Stmn1	down	1	1	0.0483024	0.0922499
GSE1925_CTRL_VS_IFNG_PRIMED_MACROPHAGE_UP	Sell	down	1	1	0.0483024	0.0922499
GSE1925_CTRL_VS_IFNG_PRIMED_MACROPHAGE_24H_IFNG_STIM_DN	Sell	down	1	1	0.0483024	0.0922499
GSE1925_CTRL_VS_IFNG_PRIMED_MACROPHAGE_DN	Sell	down	1	1	0.0483024	0.0922499
GSE1925_CTRL_VS_24H_IFNG_STIM_IFNG_PRIMED_MACROPHAGE_UP	Lmo4	down	1	1	0.0483024	0.0922499
GSE3565_CTRL_VS_LPS_INJECTED_SPLENOCYTES_UP	Sytl2	down	1	1	0.0432266	0.0922499
GSE3720_LPS_VS_PMA_STIM_VD2_GAMMADELTA_TCELL_UP	Gpr171	down	1	1	0.0318807	0.0922499
GSE3720_VD1_VS_VD2_GAMMADELTA_TCELL_WITH_PMA_STIM_UP	Dck	down	1	1	0.0483024	0.0922499
GSE3720_VD1_VS_VD2_GAMMADELTA_TCELL_UP	Tmem158	down	1	1	0.0474418	0.0922499
GSE3691_IFN_PRODUCING_KILLER_DC_VS_CONVENTIONAL_DC_SPLEEN_UP	Ctsw	down	1	1	0.0478714	0.0922499
GSE3691_IFN_PRODUCING_KILLER_DC_VS_PLASMACYTOID_DC_SPLEEN_DN	Dapl1	down	1	1	0.0478714	0.0922499
GSE3691_IFN_PRODUCING_KILLER_DC_VS_CONVENTIONAL_DC_SPLEEN_DN	Dapl1	down	1	1	0.0483024	0.0922499
GSE4142_NAIVE_BCELL_VS_PLASMA_CELL_DN	Ephx1	down	1	1	0.0483024	0.0922499
GSE4142_NAIVE_VS_GC_BCELL_DN	Dapl1	down	1	1	0.0474418	0.0922499
GSE8921_UNSTIM_0H_VS_TLR1_2_STIM_MONOCYTE_6H_UP	Dapl1	down	1	1	0.0483024	0.0922499
GSE8921_UNSTIM_0H_VS_TLR1_2_STIM_MONOCYTE_24H_DN	Gpr174	down	1	1	0.0483024	0.0922499
GSE8921_UNSTIM_VS_TLR1_2_STIM_MONOCYTE_3H_UP	Ephx1	down	1	1	0.0478714	0.0922499
GSE8921_UNSTIM_VS_TLR1_2_STIM_MONOCYTE_3H_DN	Acsbg1	down	1	1	0.0478714	0.0922499
GSE8921_UNSTIM_VS_TLR1_2_STIM_MONOCYTE_6H_DN	Bcl6	down	1	1	0.0483024	0.0922499
GSE3039_NKT_CELL_VS_ALPHABETA_CD8_TCELL_UP	Stmn1	down	1	1	0.0483024	0.0922499
GSE3039_NKT_CELL_VS_B1_BCELL_DN	Gpr34	down	1	1	0.0483024	0.0922499
GSE3039_ALPHABETA_CD8_TCELL_VS_B2_BCELL_UP	Bcl6	down	1	1	0.0474418	0.0922499
GSE3039_ALPHABETA_CD8_TCELL_VS_B2_BCELL_DN	Stmn1	down	1	1	0.0483024	0.0922499
GSE3039_ALPHABETA_CD8_TCELL_VS_B1_BCELL_UP	Ikzf1	down	1	1	0.0483024	0.0922499
GSE3039_ALPHABETA_CD8_TCELL_VS_B1_BCELL_DN	Gpr171	down	1	1	0.0478714	0.0922499
GSE3039_CD4_TCELL_VS_ALPHABETA_CD8_TCELL_UP	Dapl1	down	1	1	0.0483024	0.0922499
GSE3039_CD4_TCELL_VS_B1_BCELL_UP	Lef1	down	1	1	0.0483024	0.0922499
GSE3039_CD4_TCELL_VS_B1_BCELL_DN	Sh3bgrl2	down	1	1	0.0483024	0.0922499
GSE3039_ALPHAALPHA_VS_ALPHABETA_CD8_TCELL_UP	Gpr171	down	1	1	0.0483024	0.0922499
GSE4748_CTRL_VS_CYANOBACTERIUM_LPSLIKE_STIM_DC_3H_UP	Ikzf1	down	1	1	0.0478714	0.0922499
GSE4748_CTRL_VS_LPS_STIM_DC_3H_UP	Bcl2l11	down	1	1	0.0483024	0.0922499
GSE4748_CTRL_VS_LPS_STIM_DC_3H_DN	Ephx1	down	1	1	0.0483024	0.0922499
GSE4748_CTRL_VS_LPS_AND_CYANOBACTERIUM_LPSLIKE_STIM_DC_3H_UP	Bcl2l11	down	1	1	0.0483024	0.0922499
GSE4748_CTRL_VS_LPS_AND_CYANOBACTERIUM_LPSLIKE_STIM_DC_3H_DN	Prg4	down	1	1	0.0483024	0.0922499
GSE4748_CYANOBACTERIUM_LPSLIKE_VS_LPS_AND_CYANOBACTERIUM_LPSLIKE_STIM_DC_3H_DN	Tubb2a	down	1	1	0.0448949	0.0922499
GSE4748_LPS_VS_LPS_AND_CYANOBACTERIUM_LPSLIKE_STIM_DC_3H_DN	Dgka	down	1	1	0.0432266	0.0922499
GSE4984_UNTREATED_VS_GALECTIN1_TREATED_DC_UP	Tubb2a	down	1	1	0.0444755	0.0922499
GSE4984_UNTREATED_VS_LPS_TREATED_DC_DN	Ctsw	down	1	1	0.0428133	0.0922499
GSE4984_UNTREATED_VS_VEHICLE_CTRL_TREATED_DC_UP	Gpr34	down	1	1	0.0379738	0.0922499
GSE4984_GALECTIN1_VS_LPS_STIM_DC_UP	Sesn1	down	1	1	0.0403655	0.0922499
GSE5542_UNTREATED_VS_IFNG_TREATED_EPITHELIAL_CELLS_6H_UP	Dck	down	1	1	0.0470136	0.0922499
GSE5542_UNTREATED_VS_IFNG_TREATED_EPITHELIAL_CELLS_6H_DN	Bcl6	down	1	1	0.0483024	0.0922499
GSE5542_UNTREATED_VS_IFNA_TREATED_EPITHELIAL_CELLS_6H_DN	Lef1	down	1	1	0.0478714	0.0922499
GSE5542_IFNG_VS_IFNA_AND_IFNG_TREATED_EPITHELIAL_CELLS_24H_DN	St8sia6	down	1	1	0.0483024	0.0922499
GSE5542_IFNA_VS_IFNA_AND_IFNG_TREATED_EPITHELIAL_CELLS_6H_UP	Dck	down	1	1	0.0478714	0.0922499
GSE5542_IFNA_VS_IFNA_AND_IFNG_TREATED_EPITHELIAL_CELLS_6H_DN	Ctsw	down	1	1	0.0483024	0.0922499
GSE5542_IFNA_VS_IFNA_AND_IFNG_TREATED_EPITHELIAL_CELLS_24H_DN	Lmo4	down	1	1	0.0483024	0.0922499
GSE5542_IFNG_VS_IFNA_TREATED_EPITHELIAL_CELLS_6H_UP	Sh3bgrl2	down	1	1	0.0483024	0.0922499
GSE5542_IFNG_VS_IFNA_TREATED_EPITHELIAL_CELLS_6H_DN	Dapl1	down	1	1	0.0483024	0.0922499
GSE5542_IFNG_VS_IFNA_TREATED_EPITHELIAL_CELLS_24H_UP	Sh3bgrl2	down	1	1	0.0483024	0.0922499
GSE5542_IFNG_VS_IFNA_TREATED_EPITHELIAL_CELLS_24H_DN	Gpr174	down	1	1	0.0483024	0.0922499
GSE4811_CLASSSICALY_ACTIVATED_VS_TYPE_2_ACTIVATED_MACROPHAGE_DN	B4galnt1	down	1	1	0.0483024	0.0922499
GSE5142_HTERT_TRANSDUCED_VS_CTRL_CD8_TCELL_LATE_PASSAGE_CLONE_UP	Stmn1	down	1	1	0.0483024	0.0922499
GSE5679_CTRL_VS_PPARG_LIGAND_ROSIGLITAZONE_TREATED_DC_UP	Stmn1	down	1	1	0.0483024	0.0922499
GSE4535_BM_DERIVED_DC_VS_FOLLICULAR_DC_DN	Dgka	down	1	1	0.0483024	0.0922499
GSE5099_UNSTIM_VS_MCSF_TREATED_MONOCYTE_DAY3_UP	Ugcg	down	1	1	0.0478714	0.0922499
GSE5099_UNSTIM_VS_MCSF_TREATED_MONOCYTE_DAY7_DN	Ctsw	down	1	1	0.0483024	0.0922499
GSE5099_MONOCYTE_VS_CLASSICAL_M1_MACROPHAGE_UP	Bcl2l11	down	1	1	0.0483024	0.0922499
GSE5099_MONOCYTE_VS_ALTERNATIVE_M2_MACROPHAGE_DN	Evi2b	down	1	1	0.0436414	0.0922499
GSE5099_CLASSICAL_M1_VS_ALTERNATIVE_M2_MACROPHAGE_DN	Tcf7	down	1	1	0.0424015	0.0922499
GSE5589_UNSTIM_VS_45MIN_LPS_STIM_MACROPHAGE_UP	Dck	down	1	1	0.0483024	0.0922499
GSE5589_UNSTIM_VS_180MIN_LPS_STIM_MACROPHAGE_UP	Ephx1	down	1	1	0.0483024	0.0922499
GSE5589_UNSTIM_VS_180MIN_LPS_STIM_MACROPHAGE_DN	Ctsw	down	1	1	0.0483024	0.0922499
GSE5589_UNSTIM_VS_45MIN_LPS_AND_IL10_STIM_MACROPHAGE_DN	B4galnt1	down	1	1	0.0483024	0.0922499
GSE5589_UNSTIM_VS_180MIN_LPS_AND_IL10_STIM_MACROPHAGE_DN	Sytl2	down	1	1	0.0478714	0.0922499
GSE5589_LPS_AND_IL10_VS_LPS_AND_IL6_STIM_MACROPHAGE_45MIN_DN	Gpr174	down	1	1	0.0483024	0.0922499
GSE5589_LPS_VS_LPS_AND_IL10_STIM_MACROPHAGE_180MIN_DN	B4galnt1	down	1	1	0.0483024	0.0922499
GSE5589_LPS_VS_LPS_AND_IL10_STIM_IL6_KO_MACROPHAGE_45MIN_DN	Gpr174	down	1	1	0.0483024	0.0922499
GSE5589_LPS_AND_IL10_VS_LPS_AND_IL6_STIM_IL6_KO_MACROPHAGE_45MIN_DN	Sh3bgrl2	down	1	1	0.0478714	0.0922499
GSE5589_LPS_VS_LPS_AND_IL10_STIM_IL10_KO_MACROPHAGE_45MIN_DN	Lmo4	down	1	1	0.0483024	0.0922499
GSE5589_WT_VS_IL6_KO_LPS_AND_IL10_STIM_MACROPHAGE_45MIN_UP	Ugcg	down	1	1	0.0483024	0.0922499
GSE5589_IL6_KO_VS_IL10_KO_LPS_STIM_MACROPHAGE_45MIN_UP	Gpr34	down	1	1	0.0483024	0.0922499
GSE5589_IL6_KO_VS_IL10_KO_LPS_STIM_MACROPHAGE_45MIN_DN	Lmo4	down	1	1	0.0478714	0.0922499
GSE5589_IL6_KO_VS_IL10_KO_LPS_AND_IL6_STIM_MACROPHAGE_45MIN_DN	Ephx1	down	1	1	0.0483024	0.0922499
GSE5589_IL6_KO_VS_IL10_KO_LPS_STIM_MACROPHAGE_180MIN_UP	Acsbg1	down	1	1	0.0483024	0.0922499
GSE5589_IL6_KO_VS_IL10_KO_LPS_STIM_MACROPHAGE_180MIN_DN	Bcl2l11	down	1	1	0.0483024	0.0922499
GSE5589_IL6_KO_VS_IL10_KO_LPS_AND_IL10_STIM_MACROPHAGE_180MIN_DN	Tmem158	down	1	1	0.0483024	0.0922499
GSE5589_WT_VS_IL10_KO_LPS_STIM_MACROPHAGE_180MIN_UP	Itm2a	down	1	1	0.0387648	0.0922499
GSE5589_WT_VS_IL10_KO_LPS_AND_IL10_STIM_MACROPHAGE_180MIN_DN	Tcf7	down	1	1	0.0286431	0.0922499
GSE5589_WT_VS_IL6_KO_LPS_AND_IL10_STIM_MACROPHAGE_180MIN_UP	Tmem158	down	1	1	0.0255483	0.0922499
GSE3920_UNTREATED_VS_IFNA_TREATED_ENDOTHELIAL_CELL_DN	Lef1	down	1	1	0.0407696	0.0922499
GSE3920_IFNA_VS_IFNG_TREATED_FIBROBLAST_UP	Sytl2	down	1	1	0.0444755	0.0922499
GSE3920_UNTREATED_VS_IFNA_TREATED_FIBROBLAST_UP	Bcl2l11	down	1	1	0.0411753	0.0922499
GSE6092_CTRL_VS_BORRELIA_BIRGDOFERI_INF_ENDOTHELIAL_CELL_UP	Sesn1	down	1	1	0.0364112	0.0922499
GSE6092_CTRL_VS_BORRELIA_BIRGDOFERI_INF_ENDOTHELIAL_CELL_DN	Acsbg1	down	1	1	0.0367995	0.0922499
GSE6092_B_BURGDOFERI_VS_B_BURGDORFERI_AND_IFNG_STIM_ENDOTHELIAL_CELL_UP	Bcl2l11	down	1	1	0.0444755	0.0922499
GSE6092_IFNG_VS_IFNG_AND_B_BURGDORFERI_INF_ENDOTHELIAL_CELL_DN	Ikzf1	down	1	1	0.0444755	0.0922499
GSE6259_FLT3L_INDUCED_VS_WT_SPLENIC_DC_33D1_POS_DN	Tubb2b	down	1	1	0.0415825	0.0922499
GSE6259_33D1_POS_VS_DEC205_POS_SPLENIC_DC_UP	Bcl6	down	1	1	0.0453157	0.0922499
GSE6259_FLT3L_INDUCED_33D1_POS_DC_VS_BCELL_DN	Ikzf1	down	1	1	0.0483024	0.0922499
GSE6259_33D1_POS_DC_VS_BCELL_DN	Itm2a	down	1	1	0.0379738	0.0922499
GSE6259_33D1_POS_DC_VS_CD4_TCELL_DN	Ephx1	down	1	1	0.0436414	0.0922499
GSE6259_FLT3L_INDUCED_DEC205_POS_DC_VS_CD4_TCELL_UP	Cpm	down	1	1	0.0411753	0.0922499
GSE6259_FLT3L_INDUCED_DEC205_POS_DC_VS_CD8_TCELL_UP	Cpm	down	1	1	0.0367995	0.0922499
GSE6259_DEC205_POS_DC_VS_CD4_TCELL_DN	Gpr174	down	1	1	0.0478714	0.0922499
GSE6259_DEC205_POS_DC_VS_CD8_TCELL_DN	Lef1	down	1	1	0.0364112	0.0922499
GSE6681_DELETED_FOXP3_VS_WT_TREG_UP	Ctsw	down	1	1	0.0483024	0.0922499
GSE3203_INFLUENZA_INF_VS_IFNB_TREATED_LN_BCELL_DN	Bcl6	down	1	1	0.0483024	0.0922499
GSE3203_UNTREATED_VS_IFNB_TREATED_LN_BCELL_DN	Bcl6	down	1	1	0.0483024	0.0922499
GSE3203_WT_VS_IFNAR1_KO_INFLUENZA_INFECTED_LN_BCELL_DN	Bcl6	down	1	1	0.0483024	0.0922499
GSE6875_WT_VS_FOXP3_KO_TREG_UP	Gpr174	down	1	1	0.0483024	0.0922499
GSE7218_IGM_VS_IGG_SIGNAL_THGOUGH_ANTIGEN_BCELL_UP	Ephx1	down	1	1	0.0474418	0.0922499
GSE7509_FCGRIIB_VS_TNFA_IL1B_IL6_PGE_STIM_DC_DN	Nsg2	down	1	1	0.0367995	0.0922499
GSE7548_NAIVE_VS_DAY7_PCC_IMMUNIZATION_CD4_TCELL_UP	Dgka	down	1	1	0.0483024	0.0922499
GSE7548_DAY7_VS_DAY28_PCC_IMMUNIZATION_CD4_TCELL_DN	Sell	down	1	1	0.0478714	0.0922499
GSE7348_UNSTIM_VS_LPS_STIM_MACROPHAGE_UP	S1pr1	down	1	1	0.0415825	0.0922499
GSE7348_UNSTIM_VS_LPS_STIM_MACROPHAGE_DN	Lmo4	down	1	1	0.0411753	0.0922499
GSE7348_UNSTIM_VS_TOLERIZED_AND_LPS_STIM_MACROPHAGE_UP	Sesn1	down	1	1	0.0424015	0.0922499
GSE7348_UNSTIM_VS_TOLERIZED_AND_LPS_STIM_MACROPHAGE_DN	Dck	down	1	1	0.0415825	0.0922499
GSE7768_OVA_ALONE_VS_OVA_WITH_LPS_IMMUNIZED_MOUSE_WHOLE_SPLEEN_6H_DN	Lmo4	down	1	1	0.0419912	0.0922499
GSE7768_OVA_ALONE_VS_OVA_WITH_MPL_IMMUNIZED_MOUSE_WHOLE_SPLEEN_6H_UP	Sesn1	down	1	1	0.0465869	0.0922499
GSE7768_OVA_ALONE_VS_OVA_WITH_MPL_IMMUNIZED_MOUSE_WHOLE_SPLEEN_6H_DN	Ikzf1	down	1	1	0.0411753	0.0922499
GSE4590_PRE_BCELL_VS_LARGE_PRE_BCELL_UP	Neurl3	down	1	1	0.0387648	0.0922499
GSE4590_PRE_BCELL_VS_VPREB_POS_LARGE_PRE_BCELL_UP	Ikzf1	down	1	1	0.0403655	0.0922499
GSE4590_PRE_BCELL_VS_VPREB_POS_LARGE_PRE_BCELL_DN	Sesn1	down	1	1	0.0407696	0.0922499
GSE4590_SMALL_VS_LARGE_PRE_BCELL_UP	Tcf7	down	1	1	0.0428133	0.0922499
GSE4590_SMALL_VS_LARGE_PRE_BCELL_DN	Sell	down	1	1	0.039963	0.0922499
GSE4590_SMALL_VS_VPREB_POS_LARGE_PRE_BCELL_UP	Gpr174	down	1	1	0.0419912	0.0922499
GSE4590_LARGE_PRE_BCELL_VS_VPREB_POS_LARGE_PRE_BCELL_UP	Gpr174	down	1	1	0.0419912	0.0922499
GSE9601_NFKB_INHIBITOR_VS_PI3K_INHIBITOR_TREATED_HCMV_INF_MONOCYTE_DN	Bcl2l11	down	1	1	0.0483024	0.0922499
GSE9316_CD4_TCELL_BALBC_VS_TH17_ENRI_CD4_TCELL_SKG_PMA_IONO_STIM_FR4NEG_DN	Pou2af1	down	1	1	0.0483024	0.0922499
GSE9509_LPS_VS_LPS_AND_IL10_STIM_IL10_KO_MACROPHAGE_20MIN_DN	Stmn1	down	1	1	0.0470136	0.0922499
GSE9509_LPS_VS_LPS_AND_IL10_STIM_IL10_KO_MACROPHAGE_30MIN_UP	Ctsw	down	1	1	0.0465869	0.0922499
GSE9509_10MIN_VS_30MIN_LPS_STIM_IL10_KO_MACROPHAGE_UP	Ugcg	down	1	1	0.0483024	0.0922499
GSE9509_10MIN_VS_30MIN_LPS_AND_IL10_STIM_IL10_KO_MACROPHAGE_DN	Itm2a	down	1	1	0.0407696	0.0922499
GSE6674_UNSTIM_VS_ANTI_IGM_STIM_BCELL_UP	Ephx1	down	1	1	0.0415825	0.0922499
GSE6674_UNSTIM_VS_CPG_STIM_BCELL_DN	S1pr1	down	1	1	0.0415825	0.0922499
GSE6674_UNSTIM_VS_PL2_3_STIM_BCELL_DN	Cpm	down	1	1	0.0436414	0.0922499
GSE6674_ANTI_IGM_VS_CPG_STIM_BCELL_DN	Tmem158	down	1	1	0.0478714	0.0922499
GSE6674_ANTI_IGM_VS_PL2_3_STIM_BCELL_UP	Bcl6	down	1	1	0.0483024	0.0922499
GSE6674_ANTI_IGM_VS_ANTI_IGM_AND_CPG_STIM_BCELL_DN	Tmem158	down	1	1	0.0478714	0.0922499
GSE6674_CPG_VS_CPG_AND_ANTI_IGM_STIM_BCELL_DN	Tmem158	down	1	1	0.0483024	0.0922499
GSE6674_PL2_3_VS_ANTI_IGM_AND_CPG_STIM_BCELL_DN	Tmem158	down	1	1	0.0483024	0.0922499
GSE7831_UNSTIM_VS_INFLUENZA_STIM_PDC_1H_UP	Sesn1	down	1	1	0.0483024	0.0922499
GSE7831_UNSTIM_VS_INFLUENZA_STIM_PDC_1H_DN	Tmem158	down	1	1	0.0483024	0.0922499
GSE7831_CPG_VS_INFLUENZA_STIM_PDC_1H_DN	Sh3bgrl2	down	1	1	0.0483024	0.0922499
GSE7831_UNSTIM_VS_CPG_STIM_PDC_4H_DN	Tubb2a	down	1	1	0.0483024	0.0922499
GSE7831_UNSTIM_VS_INFLUENZA_STIM_PDC_4H_UP	B4galnt1	down	1	1	0.0483024	0.0922499
GSE7831_CPG_VS_INFLUENZA_STIM_PDC_4H_DN	Stmn1	down	1	1	0.0483024	0.0922499
GSE7831_1H_VS_4H_CPG_STIM_PDC_DN	Stmn1	down	1	1	0.0478714	0.0922499
GSE7831_1H_VS_4H_INFLUENZA_STIM_PDC_DN	Bcl2l11	down	1	1	0.0483024	0.0922499
GSE9239_CTRL_VS_TNF_INHIBITOR_TREATED_DC_DN	Dck	down	1	1	0.0483024	0.0922499
GSE8621_LPS_PRIMED_UNSTIM_VS_LPS_PRIMED_AND_LPS_STIM_MACROPHAGE_DN	Dck	down	1	1	0.0483024	0.0922499
GSE8621_UNSTIM_VS_LPS_PRIMED_UNSTIM_MACROPHAGE_DN	Lef1	down	1	1	0.0483024	0.0922499
GSE8621_LPS_STIM_VS_LPS_PRIMED_AND_LPS_STIM_MACROPHAGE_DN	Ikzf1	down	1	1	0.0483024	0.0922499
GSE8621_UNSTIM_VS_LPS_PRIMED_AND_LPS_STIM_MACROPHAGE_DN	Ikzf1	down	1	1	0.0483024	0.0922499
GSE9878_CTRL_VS_EBF_TRANSDUCED_PAX5_KO_PRO_BCELL_UP	Evi2b	down	1	1	0.0483024	0.0922499
GSE9878_CTRL_VS_EBF_TRANSDUCED_PAX5_KO_PRO_BCELL_DN	Ikzf1	down	1	1	0.0483024	0.0922499
GSE5503_LIVER_DC_VS_MLN_DC_ACTIVATED_ALLOGENIC_TCELL_DN	St8sia6	down	1	1	0.0483024	0.0922499
GSE5503_LIVER_DC_VS_SPLEEN_DC_ACTIVATED_ALLOGENIC_TCELL_UP	Cpm	down	1	1	0.0483024	0.0922499
GSE5503_LIVER_DC_VS_SPLEEN_DC_ACTIVATED_ALLOGENIC_TCELL_DN	Tubb2b	down	1	1	0.0483024	0.0922499
GSE5503_MLN_DC_VS_PLN_DC_ACTIVATED_ALLOGENIC_TCELL_UP	Tubb2a	down	1	1	0.0478714	0.0922499
GSE5503_MLN_DC_VS_PLN_DC_ACTIVATED_ALLOGENIC_TCELL_DN	Bcl2l11	down	1	1	0.0483024	0.0922499
GSE5503_MLN_DC_VS_SPLEEN_DC_ACTIVATED_ALLOGENIC_TCELL_DN	St8sia6	down	1	1	0.0483024	0.0922499
GSE5503_PLN_DC_VS_SPLEEN_DC_ACTIVATED_ALLOGENIC_TCELL_DN	Ikzf1	down	1	1	0.0483024	0.0922499
GSE10240_CTRL_VS_IL17_STIM_PRIMARY_BRONCHIAL_EPITHELIAL_CELLS_DN	Ikzf1	down	1	1	0.0478714	0.0922499
GSE10240_IL22_VS_IL22_AND_IL17_STIM_PRIMARY_BRONCHIAL_EPITHELIAL_CELLS_DN	Bcl2l11	down	1	1	0.0483024	0.0922499
GSE10240_IL22_VS_IL17_STIM_PRIMARY_BRONCHIAL_EPITHELIAL_CELLS_DN	Tubb2a	down	1	1	0.0483024	0.0922499
GSE8685_IL2_STARVED_VS_IL2_ACT_IL2_STARVED_CD4_TCELL_UP	Acsbg1	down	1	1	0.0483024	0.0922499
GSE8685_IL2_STARVED_VS_IL15_ACT_IL2_STARVED_CD4_TCELL_DN	Ikzf1	down	1	1	0.0483024	0.0922499
GSE8685_IL2_STARVED_VS_IL21_ACT_IL2_STARVED_CD4_TCELL_DN	Tubb2b	down	1	1	0.0483024	0.0922499
GSE8685_IL2_ACT_IL2_STARVED_VS_IL15_ACT_IL2_STARVED_CD4_TCELL_UP	Ephx1	down	1	1	0.0483024	0.0922499
GSE8685_IL2_ACT_IL2_STARVED_VS_IL15_ACT_IL2_STARVED_CD4_TCELL_DN	Tmem158	down	1	1	0.0483024	0.0922499
GSE8685_IL2_ACT_IL2_STARVED_VS_IL21_ACT_IL2_STARVED_CD4_TCELL_UP	Sesn1	down	1	1	0.0436414	0.0922499
GSE7596_AKT_TRANSD_VS_CTRL_CD4_TCONV_WITH_TGFB_DN	Nsg2	down	1	1	0.0293504	0.0922499
GSE10211_UV_INACT_SENDAI_VS_LIVE_SENDAI_VIRUS_TRACHEAL_EPITHELIAL_CELLS_DN	Sesn1	down	1	1	0.0419912	0.0922499
GSE10147_IL3_AND_HIVP17_VS_IL3_AND_CPG_STIM_PDC_UP	Cpm	down	1	1	0.0371893	0.0922499
GSE10422_WT_VS_BAFF_TRANSGENIC_LN_BCELL_DN	Cpm	down	1	1	0.0297067	0.0922499
GSE7568_CTRL_VS_3H_TGFB_TREATED_MACROPHAGES_WITH_IL4_AND_DEXAMETHASONE_DN	Tcf7	down	1	1	0.0424015	0.0922499
GSE7568_IL4_VS_IL4_AND_TGFB_TREATED_MACROPHAGE_24H_DN	Tubb2a	down	1	1	0.0470136	0.0922499
GSE7568_IL4_VS_IL4_AND_DEXAMETHASONE_TREATED_MACROPHAGE_UP	Tubb2a	down	1	1	0.0428133	0.0922499
GSE7568_IL4_VS_IL4_AND_DEXAMETHASONE_TREATED_MACROPHAGE_DN	Neurl3	down	1	1	0.0364112	0.0922499
GSE11386_NAIVE_VS_MEMORY_BCELL_UP	Tubb2a	down	1	1	0.0474418	0.0922499
GSE12003_MIR223_KO_VS_WT_BM_PROGENITOR_8D_CULTURE_UP	Cd27	down	1	1	0.0311492	0.0922499
GSE12003_4D_VS_8D_CULTURE_BM_PROGENITOR_UP	Itm2a	down	1	1	0.0411753	0.0922499
GSE12003_4D_VS_8D_CULTURE_BM_PROGENITOR_DN	Ctsw	down	1	1	0.0322491	0.0922499
GSE9946_IMMATURE_VS_LISTERIA_INF_MATURE_DC_DN	Pou2af1	down	1	1	0.0300647	0.0922499
GSE9946_MATURE_STIMULATORY_VS_LISTERIA_INF_MATURE_DC_UP	Lef1	down	1	1	0.0341161	0.0922499
GSE9946_MATURE_STIMULATORY_VS_PROSTAGLANDINE2_TREATED_MATURE_DC_UP	Tcf7	down	1	1	0.0329908	0.0922499
GSE12505_WT_VS_E2_2_HET_PDC_UP	Cd27	down	1	1	0.0315141	0.0922499
GSE12505_WT_VS_E2_2_HET_PDC_DN	Pou2af1	down	1	1	0.0407696	0.0922499
GSE7459_UNTREATED_VS_IL6_TREATED_ACT_CD4_TCELL_UP	Lef1	down	1	1	0.0344945	0.0922499
GSE13173_UNTREATED_VS_IL12_TREATED_ACT_CD8_TCELL_DN	Gpr34	down	1	1	0.0348745	0.0922499
GSE13762_CTRL_VS_125_VITAMIND_DAY12_DC_DN	Gpr34	down	1	1	0.0315141	0.0922499
GSE13522_CTRL_VS_T_CRUZI_G_STRAIN_INF_SKIN_DN	Ctsw	down	1	1	0.0326191	0.0922499
GSE13522_WT_VS_IFNG_KO_SKIN_UP	Itm2a	down	1	1	0.0300647	0.0922499
GSE13522_CTRL_VS_T_CRUZI_Y_STRAIN_INF_SKIN_129_MOUSE_DN	Sell	down	1	1	0.0483024	0.0922499
GSE14699_DELETIONAL_TOLERANCE_VS_ACTIVATED_CD8_TCELL_DN	Dck	down	1	1	0.0444755	0.0922499
GSE14415_INDUCED_TREG_VS_TCONV_DN	Tcf7	down	1	1	0.0407696	0.0922499
GSE14415_NATURAL_TREG_VS_TCONV_DN	Stmn1	down	1	1	0.0440577	0.0922499
GSE14415_TCONV_VS_FOXP3_KO_INDUCED_TREG_UP	Dapl1	down	1	1	0.039963	0.0922499
GSE14415_TCONV_VS_FOXP3_KO_INDUCED_TREG_DN	Stmn1	down	1	1	0.0436414	0.0922499
GSE14415_INDUCED_VS_NATURAL_TREG_DN	Stmn1	down	1	1	0.0432266	0.0922499
GSE13547_CTRL_VS_ANTI_IGM_STIM_BCELL_12H_UP	Stmn1	down	1	1	0.0453157	0.0922499
GSE13547_WT_VS_ZFX_KO_BCELL_ANTI_IGM_STIM_2H_UP	Stmn1	down	1	1	0.0432266	0.0922499
GSE13547_WT_VS_ZFX_KO_BCELL_DN	Stmn1	down	1	1	0.0444755	0.0922499
GSE15330_HSC_VS_LYMPHOID_PRIMED_MULTIPOTENT_PROGENITOR_DN	Sytl2	down	1	1	0.0448949	0.0922499
GSE15330_MEGAKARYOCYTE_ERYTHROID_VS_GRANULOCYTE_MONOCYTE_PROGENITOR_UP	Sytl2	down	1	1	0.0444755	0.0922499
GSE15330_LYMPHOID_MULTIPOTENT_VS_MEGAKARYOCYTE_ERYTHROID_PROGENITOR_IKAROS_KO_DN	Sytl2	down	1	1	0.0432266	0.0922499
GSE15330_LYMPHOID_MULTIPOTENT_VS_MEGAKARYOCYTE_ERYTHROID_PROGENITOR_DN	Stmn1	down	1	1	0.0483024	0.0922499
GSE15330_LYMPHOID_MULTIPOTENT_VS_GRANULOCYTE_MONOCYTE_PROGENITOR_UP	Itm2a	down	1	1	0.0478714	0.0922499
GSE15330_LYMPHOID_MULTIPOTENT_VS_MEGAKARYOCYTE_ERYTHROID_PROGENITOR_UP	Tmem158	down	1	1	0.0483024	0.0922499
GSE15330_HSC_VS_LYMPHOID_PRIMED_MULTIPOTENT_PROGENITOR_IKAROS_KO_DN	Ephx1	down	1	1	0.0483024	0.0922499
GSE15330_WT_VS_IKAROS_KO_MEGAKARYOCYTE_ERYTHROID_PROGENITOR_UP	Itm2a	down	1	1	0.0483024	0.0922499
GSE15330_LYMPHOID_MULTIPOTENT_VS_GRANULOCYTE_MONOCYTE_PROGENITOR_IKAROS_KO_UP	Tcf7	down	1	1	0.0478714	0.0922499
GSE15330_HSC_VS_LYMPHOID_PRIMED_MULTIPOTENT_PROGENITOR_IKAROS_KO_UP	Nsg2	down	1	1	0.0478714	0.0922499
GSE15330_HSC_VS_GRANULOCYTE_MONOCYTE_PROGENITOR_UP	Ephx1	down	1	1	0.0483024	0.0922499
GSE14908_RESTING_VS_HDM_STIM_CD4_TCELL_ATOPIC_PATIENT_UP	Tmem158	down	1	1	0.0483024	0.0922499
GSE14908_RESTING_VS_HDM_STIM_CD4_TCELL_NONATOPIC_PATIENT_UP	Bcl6	down	1	1	0.0483024	0.0922499
GSE14908_ATOPIC_VS_NONATOPIC_PATIENT_HDM_STIM_CD4_TCELL_UP	Acsbg1	down	1	1	0.0483024	0.0922499
GSE14908_ATOPIC_VS_NONATOPIC_PATIENT_HDM_STIM_CD4_TCELL_DN	Ctsw	down	1	1	0.0483024	0.0922499
GSE15139_GMCSF_TREATED_VS_UNTREATED_NEUTROPHILS_DN	Cpm	down	1	1	0.0483024	0.0922499
GSE15624_CTRL_VS_3H_HALOFUGINONE_TREATED_CD4_TCELL_DN	Dapl1	down	1	1	0.0383685	0.0922499
GSE9960_HEALTHY_VS_GRAM_POS_SEPSIS_PBMC_UP	Noxa1	down	1	1	0.0461617	0.0922499
GSE9960_HEALTHY_VS_GRAM_NEG_AND_POS_SEPSIS_PBMC_DN	Neurl3	down	1	1	0.0461617	0.0922499
GSE9960_HEALTHY_VS_SEPSIS_PBMC_UP	Itm2a	down	1	1	0.0444755	0.0922499
GSE9960_GRAM_POS_VS_GRAM_NEG_AND_POS_SEPSIS_PBMC_UP	Sh3bgrl2	down	1	1	0.0483024	0.0922499
GSE9960_GRAM_POS_VS_GRAM_NEG_AND_POS_SEPSIS_PBMC_DN	Bcl2l11	down	1	1	0.0483024	0.0922499
GSE12392_CD8A_POS_VS_NEG_SPLEEN_IFNB_KO_DC_DN	Ugcg	down	1	1	0.0483024	0.0922499
GSE12392_IFNAR_KO_VS_IFNB_KO_CD8_NEG_SPLEEN_DC_UP	Tubb2a	down	1	1	0.0474418	0.0922499
GSE12392_CD8A_POS_VS_NEG_SPLEEN_DC_DN	Stmn1	down	1	1	0.0483024	0.0922499
GSE12392_WT_VS_IFNB_KO_CD8A_NEG_SPLEEN_DC_UP	Tubb2a	down	1	1	0.0483024	0.0922499
GSE12392_WT_VS_IFNB_KO_CD8A_POS_SPLEEN_DC_UP	Sell	down	1	1	0.0483024	0.0922499
GSE15735_2H_VS_12H_HDAC_INHIBITOR_TREATED_CD4_TCELL_DN	Dck	down	1	1	0.0483024	0.0922499
GSE15735_CTRL_VS_HDAC_INHIBITOR_TREATED_CD4_TCELL_12H_UP	Ugcg	down	1	1	0.0483024	0.0922499
GSE17812_WT_VS_THPOK_KO_MEMORY_CD8_TCELL_DN	Stmn1	down	1	1	0.0483024	0.0922499
GSE17186_CD21LOW_VS_CD21HIGH_TRANSITIONAL_BCELL_DN	Stmn1	down	1	1	0.0483024	0.0922499
GSE17186_NAIVE_VS_CD21HIGH_TRANSITIONAL_BCELL_DN	Evi2b	down	1	1	0.0483024	0.0922499
GSE17186_NAIVE_VS_CD21HIGH_TRANSITIONAL_BCELL_CORD_BLOOD_DN	Sytl2	down	1	1	0.0483024	0.0922499
GSE17186_CD21LOW_VS_CD21HIGH_TRANSITIONAL_BCELL_CORD_BLOOD_UP	Tubb2b	down	1	1	0.0483024	0.0922499
GSE17186_BLOOD_VS_CORD_BLOOD_NAIVE_BCELL_UP	Tubb2b	down	1	1	0.0483024	0.0922499
GSE16266_CTRL_VS_HEATSHOCK_AND_LPS_STIM_MEF_DN	Itm2a	down	1	1	0.0483024	0.0922499
GSE19198_CTRL_VS_IL21_TREATED_TCELL_24H_DN	Evi2b	down	1	1	0.0483024	0.0922499
GSE19198_1H_VS_6H_IL21_TREATED_TCELL_DN	Sell	down	1	1	0.0483024	0.0922499
GSE19198_CTRL_VS_IL21_TREATED_TCELL_24H_UP	Sesn1	down	1	1	0.0483024	0.0922499
GSE18281_SUBCAPSULAR_VS_CENTRAL_CORTICAL_REGION_OF_THYMUS_DN	Sell	down	1	1	0.0483024	0.0922499
GSE18281_CORTICAL_THYMOCYTE_VS_WHOLE_CORTEX_THYMUS_UP	B4galnt1	down	1	1	0.0465869	0.0922499
GSE18281_CORTICAL_THYMOCYTE_VS_WHOLE_CORTEX_THYMUS_DN	Prg4	down	1	1	0.0483024	0.0922499
GSE18281_CORTEX_VS_MEDULLA_THYMUS_DN	Bcl6	down	1	1	0.0457379	0.0922499
GSE18281_SUBCAPSULAR_CORTICAL_REGION_VS_WHOLE_CORTEX_THYMUS_UP	Sesn1	down	1	1	0.0483024	0.0922499
GSE18281_SUBCAPSULAR_CORTICAL_REGION_VS_WHOLE_MEDULLA_THYMUS_DN	Cd27	down	1	1	0.0465869	0.0922499
GSE18281_PERIMEDULLARY_CORTICAL_REGION_VS_WHOLE_CORTEX_THYMUS_DN	Sell	down	1	1	0.0461617	0.0922499
GSE19923_E2A_KO_VS_HEB_AND_E2A_KO_DP_THYMOCYTE_DN	Ctsw	down	1	1	0.0436414	0.0922499
GSE19923_E2A_KO_VS_E2A_AND_HEB_KO_DP_THYMOCYTE_UP	Stmn1	down	1	1	0.0483024	0.0922499
GSE19923_E2A_KO_VS_E2A_AND_HEB_KO_DP_THYMOCYTE_DN	Ugcg	down	1	1	0.0483024	0.0922499
[truncated: 7,745 more rows]
