# Supplementary material for: Foxp3 depends on Ikaros for control of regulatory T cell gene expression and function
Source: eLife. 2024 Apr 24;12:RP91392. doi: 10.7554/eLife.91392 (PMC11042806; doi:10.7554/eLife.91392)
Supplement: Supplementary file 4. — Differentially accessible regions (DAR) were annotated to the nearest gene TSS. [file elife-91392-supp4.xlsx]

## Sheet: Ikzf1_cko_atac_DE_pairwise
Differentially accessible regions
id	chr	start	end	logFC	logCPM	F	PValue	FDR	comparison	transcript.id	gene_name
OCR_7829	chr1	182333383	182334300	-1.49819	6.47587	264.278	1.08e-23	6.42e-19	Treg_IK_StimVSTreg_IK_Unstim	ENSMUST00000050581	Gm5069-201
OCR_92038	chr6	31076220	31077185	-1.44857	6.38443	242.838	8.53e-23	2.53e-18	Treg_IK_StimVSTreg_IK_Unstim	ENSMUST00000064995	Gm13835-201
OCR_32821	chr13	112790889	112792234	-1.4299	5.88961	222.438	7.01e-22	1.39e-17	Treg_IK_StimVSTreg_IK_Unstim	ENSMUST00000156109	Gm15323-001
OCR_16259	chr11	6594824	6595848	-1.3711	6.21455	212.002	2.19e-21	3.24e-17	Treg_IK_StimVSTreg_IK_Unstim	ENSMUST00000121445	Gm11980-001
OCR_47727	chr16	91458295	91459069	-1.66448	4.90647	208.202	3.34e-21	3.97e-17	Treg_IK_StimVSTreg_IK_Unstim	ENSMUST00000149172	A930006K02Rik-001
OCR_38415	chr14	121752860	121753731	-1.42778	5.85016	206.466	4.07e-21	4.02e-17	Treg_IK_StimVSTreg_IK_Unstim	ENSMUST00000079817	Stk24-201
OCR_83916	chr4	154542722	154543622	-1.77348	4.65985	202.014	6.77e-21	5.74e-17	Treg_IK_StimVSTreg_IK_Unstim	ENSMUST00000129314	Ski-002
OCR_104045	chr7	132724445	132725375	-1.36733	5.93971	198.622	1e-20	7.44e-17	Treg_IK_StimVSTreg_IK_Unstim	ENSMUST00000163585	Il4ra-203
OCR_22472	chr12	17558629	17561386	-1.3027	6.05648	189.087	3.12e-20	2.06e-16	Treg_IK_StimVSTreg_IK_Unstim	ENSMUST00000082493	SNORA42.1-201
OCR_47075	chr16	76336943	76337627	-1.61595	4.8485	184.048	7.49e-20	4.45e-16	Treg_IK_StimVSTreg_IK_Unstim	ENSMUST00000140483	Nrip1-006
OCR_104289	chr7	135519560	135520391	-1.58172	4.92537	181.179	8.28e-20	4.47e-16	Treg_IK_StimVSTreg_IK_Unstim	ENSMUST00000129144	Rgs10-006
OCR_114038	chr9	69152070	69152915	-1.65523	4.47598	180.223	9.34e-20	4.62e-16	Treg_IK_StimVSTreg_IK_Unstim	ENSMUST00000113624	Rora-002
OCR_9732	chr10	18836332	18837437	-1.3953	5.82385	180.547	1.16e-19	5.29e-16	Treg_IK_StimVSTreg_IK_Unstim	ENSMUST00000122863	Tnfaip3-004
OCR_33280	chr14	8826679	8827599	-1.69239	5.35829	206.555	8.73e-19	3.7e-15	Treg_IK_StimVSTreg_IK_Unstim	ENSMUST00000026315	Dnase1l3-001
OCR_45891	chr16	46006373	46006760	-1.58105	5.00634	166.57	1.04e-18	4.12e-15	Treg_IK_StimVSTreg_IK_Unstim	ENSMUST00000130481	Plcxd2-001
OCR_104287	chr7	135517542	135518282	-1.69725	4.54446	159.736	1.38e-18	5.13e-15	Treg_IK_StimVSTreg_IK_Unstim	ENSMUST00000129144	Rgs10-006
OCR_17251	chr11	32435592	32436081	-1.73706	4.50609	158.026	1.96e-18	6.65e-15	Treg_IK_StimVSTreg_IK_Unstim	ENSMUST00000102821	Stk10-001
OCR_26796	chr12	114092866	114093744	-1.2288	5.86757	157.015	2.02e-18	6.65e-15	Treg_IK_StimVSTreg_IK_Unstim	ENSMUST00000021729	Gpr132-201
OCR_77757	chr4	32344657	32345797	-1.21716	6.40761	158.62	2.67e-18	8.35e-15	Treg_IK_StimVSTreg_IK_Unstim	ENSMUST00000133451	Gm11932-001
OCR_69637	chr3	8766547	8767921	-1.19151	6.1609	153.874	3.14e-18	9.3e-15	Treg_IK_StimVSTreg_IK_Unstim	ENSMUST00000157469	SNORA17.375-201
OCR_9730	chr10	18824337	18825385	-1.37919	5.19137	152.872	3.61e-18	1.02e-14	Treg_IK_StimVSTreg_IK_Unstim	ENSMUST00000122863	Tnfaip3-004
OCR_24601	chr12	74704537	74705176	-1.41154	5.44047	163.383	3.88e-18	1.05e-14	Treg_IK_StimVSTreg_IK_Unstim	ENSMUST00000119092	Prkch-002
OCR_78095	chr4	40822642	40823392	-1.42049	4.91698	149.181	6.14e-18	1.58e-14	Treg_IK_StimVSTreg_IK_Unstim	ENSMUST00000030121	B4galt1-001
OCR_4959	chr1	132919093	132919890	-1.66612	3.87421	147.873	7.42e-18	1.83e-14	Treg_IK_StimVSTreg_IK_Unstim	ENSMUST00000016673	Il10-001
OCR_29144	chr13	42198306	42199524	-1.20974	5.55648	146.709	8.79e-18	2.09e-14	Treg_IK_StimVSTreg_IK_Unstim	ENSMUST00000060148	Hivep1-201
OCR_26106	chr12	103890106	103891580	-1.18981	5.85854	145.918	9.87e-18	2.25e-14	Treg_IK_StimVSTreg_IK_Unstim	ENSMUST00000158699	Mir1936-201
OCR_9711	chr10	18718959	18719700	-1.42498	4.79298	145.102	1.11e-17	2.45e-14	Treg_IK_StimVSTreg_IK_Unstim	ENSMUST00000154749	Tnfaip3-006
OCR_15698	chr10	126599753	126600590	-1.29816	5.19296	143.354	1.44e-17	3.01e-14	Treg_IK_StimVSTreg_IK_Unstim	ENSMUST00000006914	B4galnt1-201
OCR_112396	chr9	32401850	32402406	-1.45034	4.71305	143.215	1.47e-17	3.01e-14	Treg_IK_StimVSTreg_IK_Unstim	ENSMUST00000058892	Ets1-203
OCR_67089	chr2	145657464	145658764	-1.17135	5.79113	141.48	1.91e-17	3.78e-14	Treg_IK_StimVSTreg_IK_Unstim	ENSMUST00000149269	Rin2-006
OCR_13824	chr10	93987542	93988259	-1.4515	4.49526	140.746	2.13e-17	4.08e-14	Treg_IK_StimVSTreg_IK_Unstim	ENSMUST00000171392	Tmcc3-201
OCR_83157	chr4	144825713	144826473	-1.2223	6.12739	147.05	3.88e-17	7.2e-14	Treg_IK_StimVSTreg_IK_Unstim	ENSMUST00000030336	Tnfrsf1b-001
OCR_99338	chr7	26492319	26493516	-1.27013	5.21371	136.43	4.7e-17	8.45e-14	Treg_IK_StimVSTreg_IK_Unstim	ENSMUST00000134201	Ccdc97-003
OCR_15230	chr10	119633780	119633993	-2.29544	2.80942	132.776	7.27e-17	1.24e-13	Treg_IK_StimVSTreg_IK_Unstim	ENSMUST00000135106	Irak3-004
OCR_98249	chr6	146219635	146220446	-1.54354	4.5724	132.721	7.33e-17	1.24e-13	Treg_IK_StimVSTreg_IK_Unstim	ENSMUST00000144557	Itpr2-009
OCR_5760	chr1	145847532	145847853	-1.7948	3.79413	130.163	1.1e-16	1.81e-13	Treg_IK_StimVSTreg_IK_Unstim	ENSMUST00000153527	Rgs2-003
OCR_115984	chr9	114349530	114350448	-1.22336	5.3472	129.97	1.13e-16	1.82e-13	Treg_IK_StimVSTreg_IK_Unstim	ENSMUST00000166595	Glb1-203
OCR_7823	chr1	182320331	182320827	-1.39857	4.80676	128.5	1.55e-16	2.42e-13	Treg_IK_StimVSTreg_IK_Unstim	ENSMUST00000050581	Gm5069-201
OCR_96017	chr6	114861513	114862061	-1.66314	4.01248	127.649	1.69e-16	2.57e-13	Treg_IK_StimVSTreg_IK_Unstim	ENSMUST00000032459	Vgll4-001
OCR_114211	chr9	72817603	72818300	-1.21289	5.42526	126.64	1.94e-16	2.87e-13	Treg_IK_StimVSTreg_IK_Unstim	ENSMUST00000083318	U6.278-201
OCR_95032	chr6	94584371	94585750	-1.41364	5.07099	139.091	2.18e-16	3.16e-13	Treg_IK_StimVSTreg_IK_Unstim	ENSMUST00000150811	Lrig1-003
OCR_20910	chr11	108077351	108077927	-1.58121	3.95727	125.585	2.3e-16	3.17e-13	Treg_IK_StimVSTreg_IK_Unstim	ENSMUST00000153899	Gm11655-001
OCR_92034	chr6	31064404	31065302	-1.46759	4.28989	125.639	2.28e-16	3.17e-13	Treg_IK_StimVSTreg_IK_Unstim	ENSMUST00000146766	Gm13833-001
OCR_47742	chr16	91533218	91534536	-1.04042	6.7291	125.979	2.38e-16	3.2e-13	Treg_IK_StimVSTreg_IK_Unstim	ENSMUST00000121190	Gm7860-001
OCR_32819	chr13	112774011	112774923	-1.2949	4.7778	125.244	2.43e-16	3.21e-13	Treg_IK_StimVSTreg_IK_Unstim	ENSMUST00000142621	Gm15322-001
OCR_100217	chr7	51615279	51616248	-1.30732	4.66493	124.919	2.56e-16	3.31e-13	Treg_IK_StimVSTreg_IK_Unstim	ENSMUST00000127164	Shank1-007
OCR_84005	chr4	155404653	155405301	-1.0664	5.91513	124.654	2.68e-16	3.38e-13	Treg_IK_StimVSTreg_IK_Unstim	ENSMUST00000126009	Gm16008-001
OCR_7779	chr1	182129278	182130073	-1.1683	5.75751	128.87	2.94e-16	3.62e-13	Treg_IK_StimVSTreg_IK_Unstim	ENSMUST00000161743	Adck3-014
OCR_39085	chr15	12159351	12160717	-1.11732	5.84476	123.979	2.99e-16	3.62e-13	Treg_IK_StimVSTreg_IK_Unstim	ENSMUST00000173071	Mtmr12-005
OCR_72310	chr3	79646089	79646408	-1.31745	4.59492	122.592	3.76e-16	4.47e-13	Treg_IK_StimVSTreg_IK_Unstim	ENSMUST00000029568	Tmem144-201
OCR_87017	chr5	77573601	77574363	-1.26821	4.77285	121.95	4.19e-16	4.87e-13	Treg_IK_StimVSTreg_IK_Unstim	ENSMUST00000156195	Gm15831-001
OCR_97884	chr6	142865738	142866723	-1.1461	6.41411	133.579	5.85e-16	6.68e-13	Treg_IK_StimVSTreg_IK_Unstim	ENSMUST00000164005	St8sia1-201
OCR_20987	chr11	109281147	109282286	-1.02898	6.1775	119.089	6.77e-16	7.58e-13	Treg_IK_StimVSTreg_IK_Unstim	ENSMUST00000092500	Amz2-201
OCR_116112	chr9	116061860	116062899	-1.28659	4.61784	118.898	6.99e-16	7.68e-13	Treg_IK_StimVSTreg_IK_Unstim	ENSMUST00000035014	Tgfbr2-201
OCR_7812	chr1	182289419	182289911	-1.1993	4.99407	118.08	8.03e-16	8.51e-13	Treg_IK_StimVSTreg_IK_Unstim	ENSMUST00000050581	Gm5069-201
OCR_95245	chr6	98942409	98943558	-1.24751	4.93773	118.132	7.96e-16	8.51e-13	Treg_IK_StimVSTreg_IK_Unstim	ENSMUST00000142164	Foxp1-010
OCR_105888	chr8	14985463	14986372	-1.08544	6.67804	127.229	9.73e-16	1.01e-12	Treg_IK_StimVSTreg_IK_Unstim	ENSMUST00000162444	Arhgef10-006
OCR_49804	chr17	29573807	29574676	-1.12704	5.33142	116.451	1.06e-15	1.09e-12	Treg_IK_StimVSTreg_IK_Unstim	ENSMUST00000024811	Pim1-201
OCR_41143	chr15	66961381	66962016	-1.42859	3.9556	115.825	1.18e-15	1.19e-12	Treg_IK_StimVSTreg_IK_Unstim	ENSMUST00000092640	St3gal1-202
OCR_7828	chr1	182331888	182332223	-1.31774	4.57904	115.718	1.2e-15	1.19e-12	Treg_IK_StimVSTreg_IK_Unstim	ENSMUST00000050581	Gm5069-201
OCR_88090	chr5	106146817	106147928	-1.13451	5.76767	120.088	1.57e-15	1.53e-12	Treg_IK_StimVSTreg_IK_Unstim	ENSMUST00000156630	Lrrc8d-005
OCR_15195	chr10	118731244	118732174	-1.28108	4.60764	113.57	1.75e-15	1.67e-12	Treg_IK_StimVSTreg_IK_Unstim	ENSMUST00000020315	Cand1-001
OCR_23494	chr12	40950462	40950690	-1.3657	4.86709	122.612	1.8e-15	1.7e-12	Treg_IK_StimVSTreg_IK_Unstim	ENSMUST00000171356	Gm7008-003
OCR_23483	chr12	40860936	40861618	-1.62986	4.14168	127.606	1.88e-15	1.72e-12	Treg_IK_StimVSTreg_IK_Unstim	ENSMUST00000002640	Scin-001
OCR_77788	chr4	32430616	32431666	-1.14042	5.37321	113.136	1.89e-15	1.72e-12	Treg_IK_StimVSTreg_IK_Unstim	ENSMUST00000108179	Bach2-202
OCR_23489	chr12	40924921	40927415	-1.09624	5.58441	111.36	2.58e-15	2.27e-12	Treg_IK_StimVSTreg_IK_Unstim	ENSMUST00000164804	Gm17056-001
OCR_58177	chr19	14769763	14770474	-1.54967	4.26808	111.338	2.59e-15	2.27e-12	Treg_IK_StimVSTreg_IK_Unstim	ENSMUST00000122726	U4.32-201
OCR_73462	chr3	100240498	100241241	-1.25356	4.73556	112.327	2.6e-15	2.27e-12	Treg_IK_StimVSTreg_IK_Unstim	ENSMUST00000152827	4930406D18Rik-001
OCR_95045	chr6	94615193	94615634	-1.5951	4.74485	139.426	2.85e-15	2.45e-12	Treg_IK_StimVSTreg_IK_Unstim	ENSMUST00000150811	Lrig1-003
OCR_93019	chr6	51237339	51238507	-1.34389	4.21315	110.704	2.9e-15	2.45e-12	Treg_IK_StimVSTreg_IK_Unstim	ENSMUST00000083571	Mir148a-201
OCR_69023	chr2	173174888	173175945	-1.15353	5.23798	110.568	2.97e-15	2.48e-12	Treg_IK_StimVSTreg_IK_Unstim	ENSMUST00000147357	Gm14642-001
OCR_6721	chr1	163695968	163696465	-1.33232	4.93892	116.949	3.03e-15	2.49e-12	Treg_IK_StimVSTreg_IK_Unstim	ENSMUST00000074892	Fasl-202
OCR_60752	chr2	18880127	18881193	-1.10714	5.36696	110.259	3.13e-15	2.55e-12	Treg_IK_StimVSTreg_IK_Unstim	ENSMUST00000006912	Pip4k2a-001
OCR_27416	chr13	5863492	5863827	-1.17685	4.95234	110.085	3.23e-15	2.59e-12	Treg_IK_StimVSTreg_IK_Unstim	ENSMUST00000000080	Klf6-201
OCR_32817	chr13	112767871	112769056	-1.04551	5.57753	109.132	3.83e-15	3.03e-12	Treg_IK_StimVSTreg_IK_Unstim	ENSMUST00000142621	Gm15322-001
OCR_47735	chr16	91475741	91476626	-1.11096	5.3978	108.329	4.44e-15	3.46e-12	Treg_IK_StimVSTreg_IK_Unstim	ENSMUST00000023689	Ifnar1-001
OCR_9712	chr10	18719746	18720655	-1.33865	4.46447	107.658	5e-15	3.8e-12	Treg_IK_StimVSTreg_IK_Unstim	ENSMUST00000154749	Tnfaip3-006
OCR_9733	chr10	18841938	18842427	-1.25582	4.31969	107.656	5e-15	3.8e-12	Treg_IK_StimVSTreg_IK_Unstim	ENSMUST00000122863	Tnfaip3-004
OCR_51702	chr17	66310723	66311615	-1.14072	5.36478	108.893	5.09e-15	3.82e-12	Treg_IK_StimVSTreg_IK_Unstim	ENSMUST00000139901	Ankrd12-007
OCR_76867	chr4	6902453	6903615	-1.01274	6.21975	108.045	5.36e-15	3.97e-12	Treg_IK_StimVSTreg_IK_Unstim	ENSMUST00000150082	Tox-004
OCR_9664	chr10	17912929	17913596	-1.34451	4.62508	110.584	5.53e-15	4.05e-12	Treg_IK_StimVSTreg_IK_Unstim	ENSMUST00000095817	Ect2l-201
OCR_36985	chr14	79937193	79937712	-1.16378	4.91666	106.546	6.12e-15	4.37e-12	Treg_IK_StimVSTreg_IK_Unstim	ENSMUST00000088767	Elf1-202
OCR_40808	chr15	59973016	59973756	-1.10823	5.81606	112.733	6.08e-15	4.37e-12	Treg_IK_StimVSTreg_IK_Unstim	ENSMUST00000104323	U6.513-201
OCR_95422	chr6	100756785	100757043	-2.08451	2.6491	106.387	6.3e-15	4.45e-12	Treg_IK_StimVSTreg_IK_Unstim	ENSMUST00000063854	Ppp4r2-201
OCR_95736	chr6	108617619	108618767	-1.21865	4.56728	106.31	6.38e-15	4.46e-12	Treg_IK_StimVSTreg_IK_Unstim	ENSMUST00000137478	0610040F04Rik-001
OCR_20347	chr11	99013457	99014227	-1.60494	3.86898	105.894	6.89e-15	4.68e-12	Treg_IK_StimVSTreg_IK_Unstim	ENSMUST00000103134	Ccr7-001
OCR_50957	chr17	50131828	50132864	-1.22503	4.58696	105.852	6.94e-15	4.68e-12	Treg_IK_StimVSTreg_IK_Unstim	ENSMUST00000159471	Gm16554-001
OCR_94078	chr6	72906243	72907014	-1.09804	5.02131	105.897	6.88e-15	4.68e-12	Treg_IK_StimVSTreg_IK_Unstim	ENSMUST00000114049	Tmsb10-002
OCR_54547	chr18	35723062	35723671	-1.4489	3.86392	105.333	7.63e-15	5.09e-12	Treg_IK_StimVSTreg_IK_Unstim	ENSMUST00000041514	Matr3-201
OCR_29230	chr13	43869322	43870009	-1.20654	4.77493	105.196	7.83e-15	5.16e-12	Treg_IK_StimVSTreg_IK_Unstim	ENSMUST00000015540	Cd83-201
OCR_47700	chr16	91056384	91057318	-1.01297	6.01378	105.716	8.36e-15	5.45e-12	Treg_IK_StimVSTreg_IK_Unstim	ENSMUST00000147848	4931406G06Rik-001
OCR_18098	chr11	54771926	54772520	-1.0352	5.40651	104.457	8.97e-15	5.76e-12	Treg_IK_StimVSTreg_IK_Unstim	ENSMUST00000126703	Tnip1-004
OCR_99202	chr7	25242359	25243503	-1.06208	5.53977	104.426	9.02e-15	5.76e-12	Treg_IK_StimVSTreg_IK_Unstim	ENSMUST00000002284	Plaur-201
OCR_23149	chr12	33999758	34000499	-1.09359	5.44742	104.726	9.34e-15	5.89e-12	Treg_IK_StimVSTreg_IK_Unstim	ENSMUST00000154742	Atxn7l1-008
OCR_101766	chr7	86445400	86446189	-1.1505	5.14808	105.173	9.72e-15	6.07e-12	Treg_IK_StimVSTreg_IK_Unstim	ENSMUST00000135333	Abhd2-002
OCR_62734	chr2	58009845	58010055	-1.31648	4.34727	103.368	1.1e-14	6.78e-12	Treg_IK_StimVSTreg_IK_Unstim	ENSMUST00000131443	Cytip-008
OCR_21317	chr11	115881934	115882212	-1.8472	3.00285	102.368	1.32e-14	8e-12	Treg_IK_StimVSTreg_IK_Unstim	ENSMUST00000139378	H3f3b-003
OCR_1240	chr1	39993092	39993816	-1.16081	4.92609	101.705	1.5e-14	8.88e-12	Treg_IK_StimVSTreg_IK_Unstim	ENSMUST00000088000	Map4k4-202
OCR_2305	chr1	64354912	64355854	-1.34314	4.18277	100.694	1.81e-14	1.06e-11	Treg_IK_StimVSTreg_IK_Unstim	ENSMUST00000175487	AC167197.1-201
OCR_12994	chr10	80656763	80657500	-1.23962	5.00984	107.322	2.04e-14	1.19e-11	Treg_IK_StimVSTreg_IK_Unstim	ENSMUST00000129834	2310050B05Rik-003
OCR_22462	chr12	17512478	17513059	-1.32042	4.06732	98.625	2.68e-14	1.52e-11	Treg_IK_StimVSTreg_IK_Unstim	ENSMUST00000171737	Odc1-202
OCR_9367	chr10	12579988	12580987	-1.40444	4.00517	98.4774	2.76e-14	1.54e-11	Treg_IK_StimVSTreg_IK_Unstim	ENSMUST00000076817	Utrn-202
OCR_14702	chr10	110952937	110954458	-1.10859	5.85546	110.155	2.92e-14	1.59e-11	Treg_IK_StimVSTreg_IK_Unstim	ENSMUST00000164773	Phlda1-001
OCR_58530	chr19	29345409	29346135	-1.03613	5.34223	98.1736	2.92e-14	1.59e-11	Treg_IK_StimVSTreg_IK_Unstim	ENSMUST00000025705	Jak2-201
OCR_67472	chr2	150863740	150864264	-1.44001	3.88285	98.2098	2.9e-14	1.59e-11	Treg_IK_StimVSTreg_IK_Unstim	ENSMUST00000140124	Nanp-002
OCR_15246	chr10	119812167	119813544	-1.17018	4.65311	97.9898	3.03e-14	1.63e-11	Treg_IK_StimVSTreg_IK_Unstim	ENSMUST00000161511	1700006J14Rik-004
OCR_89335	chr5	124524803	124525473	-1.02404	5.58235	97.4743	3.35e-14	1.77e-11	Treg_IK_StimVSTreg_IK_Unstim	ENSMUST00000153433	Abcb9-005
OCR_67435	chr2	150575928	150576222	-1.19062	4.54765	97.2206	3.51e-14	1.84e-11	Treg_IK_StimVSTreg_IK_Unstim	ENSMUST00000156476	Gm16962-201
OCR_73497	chr3	100814372	100815076	-1.09347	5.05206	97.1341	3.57e-14	1.84e-11	Treg_IK_StimVSTreg_IK_Unstim	ENSMUST00000167086	Cd101-201
OCR_63707	chr2	74587227	74588238	-1.24903	4.37167	96.9325	3.71e-14	1.89e-11	Treg_IK_StimVSTreg_IK_Unstim	ENSMUST00000100000	6720416L17Rik-201
OCR_2127	chr1	60970019	60970573	-1.0472	5.28123	96.379	4.14e-14	2.06e-11	Treg_IK_StimVSTreg_IK_Unstim	ENSMUST00000144147	Ctla4-003
OCR_92029	chr6	31038086	31039028	-1.3902	3.89915	96.1838	4.29e-14	2.12e-11	Treg_IK_StimVSTreg_IK_Unstim	ENSMUST00000123757	Gm13834-001
OCR_26711	chr12	113006185	113007105	1.49701	3.48908	95.4984	4.91e-14	2.39e-11	Treg_IK_StimVSTreg_IK_Unstim	ENSMUST00000120544	Klc1-004
OCR_35946	chr14	61330764	61331722	-1.11451	5.11645	96.3851	4.95e-14	2.39e-11	Treg_IK_StimVSTreg_IK_Unstim	ENSMUST00000162131	Spata13-009
OCR_109293	chr8	96702695	96703238	-1.34021	4.17285	96.0989	4.93e-14	2.39e-11	Treg_IK_StimVSTreg_IK_Unstim	ENSMUST00000034215	Mt1-201
OCR_15140	chr10	118070414	118071159	-1.09192	4.92832	94.9497	5.46e-14	2.62e-11	Treg_IK_StimVSTreg_IK_Unstim	ENSMUST00000068592	Ifng-201
OCR_19646	chr11	87262052	87262787	-1.48032	3.70535	94.8187	5.61e-14	2.65e-11	Treg_IK_StimVSTreg_IK_Unstim	ENSMUST00000093731	U3.9-201
OCR_61809	chr2	35362157	35363196	-1.13088	4.79765	94.8048	5.62e-14	2.65e-11	Treg_IK_StimVSTreg_IK_Unstim	ENSMUST00000130083	Gm13447-001
OCR_9743	chr10	18905570	18906480	-1.03754	5.79801	99.8467	6e-14	2.81e-11	Treg_IK_StimVSTreg_IK_Unstim	ENSMUST00000053225	Olig3-201
OCR_65984	chr2	125560910	125561958	-1.13898	4.58172	94.4281	6.05e-14	2.81e-11	Treg_IK_StimVSTreg_IK_Unstim	ENSMUST00000157002	Shc4-004
OCR_54214	chr18	24833135	24834370	-1.28489	4.08111	93.9558	6.64e-14	3.02e-11	Treg_IK_StimVSTreg_IK_Unstim	ENSMUST00000122523	n-R5s23-201
OCR_95681	chr6	108274353	108275364	-1.29365	4.1544	93.8737	6.75e-14	3.04e-11	Treg_IK_StimVSTreg_IK_Unstim	ENSMUST00000166013	Itpr1-206
OCR_57731	chr19	5842041	5842469	-1.92408	3.06103	97.2348	8.16e-14	3.6e-11	Treg_IK_StimVSTreg_IK_Unstim	ENSMUST00000173714	Neat1-004
OCR_118392	chrX	156173433	156174574	-1.09574	5.01243	92.325	9.53e-14	4.13e-11	Treg_IK_StimVSTreg_IK_Unstim	ENSMUST00000141354	Sh3kbp1-003
OCR_48093	chr16	96121328	96122446	-1.02266	5.17089	91.9714	9.85e-14	4.21e-11	Treg_IK_StimVSTreg_IK_Unstim	ENSMUST00000144984	Gm15340-001
OCR_92048	chr6	31100456	31100797	-2.28718	2.57644	100.235	9.8e-14	4.21e-11	Treg_IK_StimVSTreg_IK_Unstim	ENSMUST00000118459	Gm13835-001
OCR_72599	chr3	84930754	84931560	-1.11745	4.89071	91.3673	1.11e-13	4.71e-11	Treg_IK_StimVSTreg_IK_Unstim	ENSMUST00000106034	Dear1-201
OCR_25181	chr12	85561959	85562452	-1.48021	3.93495	90.7783	1.25e-13	5.19e-11	Treg_IK_StimVSTreg_IK_Unstim	ENSMUST00000046266	C130039O16Rik-201
OCR_12588	chr10	76261239	76262488	-1.00713	5.12847	90.5231	1.32e-13	5.43e-11	Treg_IK_StimVSTreg_IK_Unstim	ENSMUST00000168240	Pcbp3-005
OCR_113730	chr9	62197002	62197453	-1.3902	4.0772	90.4161	1.47e-13	5.97e-11	Treg_IK_StimVSTreg_IK_Unstim	ENSMUST00000126451	Anp32a-007
OCR_57993	chr19	10806266	10807068	-1.3592	4.05823	90.1708	1.63e-13	6.49e-11	Treg_IK_StimVSTreg_IK_Unstim	ENSMUST00000025571	Cd5-201
OCR_103183	chr7	117094677	117095558	-1.05009	4.94379	89.5172	1.62e-13	6.49e-11	Treg_IK_StimVSTreg_IK_Unstim	ENSMUST00000151923	Dennd5a-004
OCR_111101	chr8	129362905	129363920	-1.05962	5.4437	94.0498	1.63e-13	6.49e-11	Treg_IK_StimVSTreg_IK_Unstim	ENSMUST00000083703	SNORA14.1-201
OCR_31104	chr13	83704839	83705972	-1.1229	4.75713	89.2072	1.72e-13	6.74e-11	Treg_IK_StimVSTreg_IK_Unstim	ENSMUST00000091446	Mef2c-202
OCR_70859	chr3	38179012	38179595	-1.06201	5.05621	89.193	1.73e-13	6.74e-11	Treg_IK_StimVSTreg_IK_Unstim	ENSMUST00000175245	AC162799.1-201
OCR_89258	chr5	123580774	123581149	-1.38356	3.97438	88.9752	1.8e-13	7e-11	Treg_IK_StimVSTreg_IK_Unstim	ENSMUST00000162208	Rhof-002
OCR_10016	chr10	22017938	22018253	-1.37204	3.88475	89.4641	1.85e-13	7.14e-11	Treg_IK_StimVSTreg_IK_Unstim	ENSMUST00000131558	H60b-001
OCR_114385	chr9	77759202	77759952	-1.06759	5.07478	89.3612	1.89e-13	7.24e-11	Treg_IK_StimVSTreg_IK_Unstim	ENSMUST00000034904	Elovl5-001
OCR_36981	chr14	79929804	79930579	-1.15745	4.4577	88.5385	1.97e-13	7.45e-11	Treg_IK_StimVSTreg_IK_Unstim	ENSMUST00000088767	Elf1-202
OCR_112377	chr9	32314621	32315471	-1.03796	5.57633	93.4138	2.02e-13	7.54e-11	Treg_IK_StimVSTreg_IK_Unstim	ENSMUST00000016231	Fli1-201
OCR_105064	chr7	148184695	148185725	-1.40154	3.45523	88.2843	2.08e-13	7.7e-11	Treg_IK_StimVSTreg_IK_Unstim	ENSMUST00000026565	Ifitm3-001
OCR_45437	chr16	36476775	36477585	-1.02074	5.24959	88.2192	2.11e-13	7.76e-11	Treg_IK_StimVSTreg_IK_Unstim	ENSMUST00000068182	Stfa3-201
OCR_55571	chr18	56893393	56894082	-1.0257	5.66155	94.5298	2.16e-13	7.92e-11	Treg_IK_StimVSTreg_IK_Unstim	ENSMUST00000128651	Lmnb1-002
OCR_15196	chr10	118732808	118733285	-1.50185	3.16107	88.0158	2.19e-13	7.94e-11	Treg_IK_StimVSTreg_IK_Unstim	ENSMUST00000020315	Cand1-001
OCR_71331	chr3	52102267	52103173	-1.03776	5.14649	88.2853	2.26e-13	8.07e-11	Treg_IK_StimVSTreg_IK_Unstim	ENSMUST00000174738	Gm20402-001
OCR_51999	chr17	71335781	71337010	-1.03636	6.62119	106.083	2.3e-13	8.18e-11	Treg_IK_StimVSTreg_IK_Unstim	ENSMUST00000131820	Myl12b-002
OCR_104473	chr7	139864171	139864745	-1.25885	4.11744	87.5976	2.39e-13	8.45e-11	Treg_IK_StimVSTreg_IK_Unstim	ENSMUST00000132849	Gm15582-001
OCR_5759	chr1	145847123	145847325	-1.55103	3.4673	87.5595	2.54e-13	8.82e-11	Treg_IK_StimVSTreg_IK_Unstim	ENSMUST00000153527	Rgs2-003
OCR_21504	chr11	117826676	117827391	-1.1408	5.02636	92.3311	2.54e-13	8.82e-11	Treg_IK_StimVSTreg_IK_Unstim	ENSMUST00000054002	Socs3-001
OCR_103077	chr7	114807549	114808645	-1.03688	4.9021	87.3291	2.53e-13	8.82e-11	Treg_IK_StimVSTreg_IK_Unstim	ENSMUST00000060348	5330417H12Rik-201
OCR_19682	chr11	87571826	87573403	-1.1323	4.98043	88.5153	2.67e-13	9.11e-11	Treg_IK_StimVSTreg_IK_Unstim	ENSMUST00000107939	Bzrap1-202
OCR_7064	chr1	169279361	169279678	-1.76684	3.04384	87.3165	2.82e-13	9.57e-11	Treg_IK_StimVSTreg_IK_Unstim	ENSMUST00000082492	U6.19-201
OCR_576	chr1	20902220	20903785	-1.06281	4.89521	86.7048	2.88e-13	9.62e-11	Treg_IK_StimVSTreg_IK_Unstim	ENSMUST00000104126	SNORA17.97-201
OCR_26007	chr12	102121229	102122228	-1.0261	5.20124	87.2053	2.86e-13	9.62e-11	Treg_IK_StimVSTreg_IK_Unstim	ENSMUST00000133970	9030617O03Rik-007
OCR_73543	chr3	101098888	101099753	-1.12848	4.69452	86.5336	2.98e-13	9.88e-11	Treg_IK_StimVSTreg_IK_Unstim	ENSMUST00000029456	Cd2-001
OCR_8049	chr1	185900596	185902165	-1.38061	3.76488	86.2727	3.15e-13	1.02e-10	Treg_IK_StimVSTreg_IK_Unstim	ENSMUST00000048655	Dusp10-001
OCR_101610	chr7	82941141	82941935	-1.09552	5.65825	99.7775	3.26e-13	1.05e-10	Treg_IK_StimVSTreg_IK_Unstim	ENSMUST00000103773	AC158749.1-201
OCR_90859	chr5	150327678	150328290	-1.23206	4.07313	86.0602	3.29e-13	1.05e-10	Treg_IK_StimVSTreg_IK_Unstim	ENSMUST00000110502	Wdr95-001
OCR_18244	chr11	58114459	58115050	-1.1827	4.28463	85.7067	3.54e-13	1.13e-10	Treg_IK_StimVSTreg_IK_Unstim	ENSMUST00000065632	Zfp692-201
OCR_41324	chr15	72967869	72968522	-1.07073	4.96873	85.6329	3.86e-13	1.22e-10	Treg_IK_StimVSTreg_IK_Unstim	ENSMUST00000175696	Eif2c2-001
OCR_112470	chr9	32748629	32749500	-1.25551	4.15039	85.2758	3.87e-13	1.22e-10	Treg_IK_StimVSTreg_IK_Unstim	ENSMUST00000034534	Ets1-201
OCR_21272	chr11	115504599	115505005	-1.28733	3.81651	85.1976	3.94e-13	1.22e-10	Treg_IK_StimVSTreg_IK_Unstim	ENSMUST00000118223	Gm11702-001
OCR_54164	chr18	24071143	24072428	-1.04461	4.60601	85.2195	3.92e-13	1.22e-10	Treg_IK_StimVSTreg_IK_Unstim	ENSMUST00000167150	Rpl19-ps7-201
OCR_44744	chr16	23997194	23998419	1.06896	4.57968	85.0356	4.07e-13	1.24e-10	Treg_IK_StimVSTreg_IK_Unstim	ENSMUST00000023151	Bcl6-001
OCR_77876	chr4	33330921	33331256	-1.01632	4.83376	85.0361	4.07e-13	1.24e-10	Treg_IK_StimVSTreg_IK_Unstim	ENSMUST00000155616	Pnrc1-003
OCR_108729	chr8	87498753	87498937	-1.5379	3.1823	85.0232	4.08e-13	1.24e-10	Treg_IK_StimVSTreg_IK_Unstim	ENSMUST00000127215	Prdx2-007
OCR_42924	chr15	96468533	96469104	-1.03012	5.44156	89.7253	4.11e-13	1.25e-10	Treg_IK_StimVSTreg_IK_Unstim	ENSMUST00000100262	Slc38a1-203
OCR_20346	chr11	99011626	99012125	-1.21338	4.02824	84.8011	4.28e-13	1.27e-10	Treg_IK_StimVSTreg_IK_Unstim	ENSMUST00000103134	Ccr7-001
OCR_27630	chr13	9764704	9765119	-1.27206	4.05177	84.7912	4.29e-13	1.27e-10	Treg_IK_StimVSTreg_IK_Unstim	ENSMUST00000152725	Zmynd11-009
OCR_104064	chr7	132781937	132782724	-1.14159	4.30985	84.8277	4.25e-13	1.27e-10	Treg_IK_StimVSTreg_IK_Unstim	ENSMUST00000084605	Il21r-202
OCR_46236	chr16	52094555	52096236	-1.03793	5.57395	91.5703	4.39e-13	1.28e-10	Treg_IK_StimVSTreg_IK_Unstim	ENSMUST00000158761	SNORA84.3-201
OCR_15336	chr10	120910825	120911551	-1.03082	5.13058	84.0076	5.06e-13	1.47e-10	Treg_IK_StimVSTreg_IK_Unstim	ENSMUST00000026902	Rassf3-201
OCR_87693	chr5	100463258	100463579	-1.53078	3.12108	83.6582	5.44e-13	1.57e-10	Treg_IK_StimVSTreg_IK_Unstim	ENSMUST00000135424	Hnrpdl-007
OCR_9410	chr10	12852760	12853506	-2.06322	2.50488	83.2108	5.98e-13	1.72e-10	Treg_IK_StimVSTreg_IK_Unstim	ENSMUST00000068371	Plagl1-201
OCR_112407	chr9	32459470	32460436	-1.0788	4.59698	83.1423	6.07e-13	1.73e-10	Treg_IK_StimVSTreg_IK_Unstim	ENSMUST00000058892	Ets1-203
OCR_106319	chr8	26242617	26243747	-1.14676	4.21693	82.9129	6.37e-13	1.8e-10	Treg_IK_StimVSTreg_IK_Unstim	ENSMUST00000064883	Plekha2-001
OCR_114045	chr9	69187589	69188137	-1.24962	4.00719	82.6879	6.69e-13	1.88e-10	Treg_IK_StimVSTreg_IK_Unstim	ENSMUST00000169688	Rora-201
OCR_56933	chr18	80881041	80881642	-1.3994	3.16351	82.1876	7.44e-13	2.07e-10	Treg_IK_StimVSTreg_IK_Unstim	ENSMUST00000167977	Nfatc1-203
OCR_54212	chr18	24831885	24832158	-2.49037	1.85275	82.1133	7.56e-13	2.1e-10	Treg_IK_StimVSTreg_IK_Unstim	ENSMUST00000122523	n-R5s23-201
OCR_27689	chr13	10343495	10344132	-1.46522	3.59701	81.9239	7.87e-13	2.17e-10	Treg_IK_StimVSTreg_IK_Unstim	ENSMUST00000128990	Gm16950-201
OCR_114210	chr9	72816168	72816772	-1.26373	3.92008	81.8207	8.05e-13	2.21e-10	Treg_IK_StimVSTreg_IK_Unstim	ENSMUST00000083318	U6.278-201
OCR_63184	chr2	65708836	65709844	-1.23891	4.13662	81.6396	8.37e-13	2.29e-10	Treg_IK_StimVSTreg_IK_Unstim	ENSMUST00000155722	Gm13619-001
OCR_57730	chr19	5841322	5841995	-1.3978	3.53727	81.4579	8.7e-13	2.36e-10	Treg_IK_StimVSTreg_IK_Unstim	ENSMUST00000173714	Neat1-004
OCR_16227	chr11	6422715	6423509	-1.07672	4.86588	82.0155	9.3e-13	2.5e-10	Treg_IK_StimVSTreg_IK_Unstim	ENSMUST00000146536	Myo1g-005
OCR_75071	chr3	135303092	135303666	-1.08721	4.58758	80.8925	9.83e-13	2.63e-10	Treg_IK_StimVSTreg_IK_Unstim	ENSMUST00000106276	Nfkb1-202
OCR_90963	chr5	152054268	152055310	-1.14597	4.33472	80.5885	1.05e-12	2.79e-10	Treg_IK_StimVSTreg_IK_Unstim	ENSMUST00000126770	Stard13-005
OCR_116148	chr9	116277975	116278816	-1.256	4.06312	80.5054	1.07e-12	2.81e-10	Treg_IK_StimVSTreg_IK_Unstim	ENSMUST00000035014	Tgfbr2-201
OCR_44060	chr16	11143944	11144465	1.13417	5.60944	94.2835	1.1e-12	2.88e-10	Treg_IK_StimVSTreg_IK_Unstim	ENSMUST00000102303	mmu-mir-689-2.1-201
OCR_7827	chr1	182328566	182328886	-1.44375	3.2575	80.1836	1.15e-12	2.98e-10	Treg_IK_StimVSTreg_IK_Unstim	ENSMUST00000050581	Gm5069-201
OCR_47702	chr16	91061759	91062463	-1.09046	4.54419	79.7606	1.26e-12	3.25e-10	Treg_IK_StimVSTreg_IK_Unstim	ENSMUST00000035689	4932438H23Rik-001
OCR_116339	chr9	119878144	119880433	-1.10067	4.66138	79.7511	1.26e-12	3.25e-10	Treg_IK_StimVSTreg_IK_Unstim	ENSMUST00000035101	Csrnp1-201
OCR_22471	chr12	17558379	17558578	-1.65521	2.78913	79.3056	1.39e-12	3.51e-10	Treg_IK_StimVSTreg_IK_Unstim	ENSMUST00000082493	SNORA42.1-201
OCR_64578	chr2	93296752	93297162	-1.3888	3.39491	79.3039	1.39e-12	3.51e-10	Treg_IK_StimVSTreg_IK_Unstim	ENSMUST00000163052	Gm10804-002
OCR_97899	chr6	142904909	142905729	-1.22822	4.03854	79.2526	1.4e-12	3.51e-10	Treg_IK_StimVSTreg_IK_Unstim	ENSMUST00000032421	St8sia1-001
OCR_104063	chr7	132778888	132780226	-1.00356	4.84044	79.274	1.4e-12	3.51e-10	Treg_IK_StimVSTreg_IK_Unstim	ENSMUST00000084605	Il21r-202
OCR_4954	chr1	132899570	132900355	-1.10357	4.46559	79.4493	1.43e-12	3.55e-10	Treg_IK_StimVSTreg_IK_Unstim	ENSMUST00000016673	Il10-001
OCR_114614	chr9	83235944	83237020	-1.20891	3.96268	79.092	1.45e-12	3.58e-10	Treg_IK_StimVSTreg_IK_Unstim	ENSMUST00000168848	Lca5-201
OCR_18120	chr11	54944427	54945274	-1.06474	4.471	78.9227	1.51e-12	3.68e-10	Treg_IK_StimVSTreg_IK_Unstim	ENSMUST00000155883	Gm12233-001
OCR_9648	chr10	17779483	17779929	-1.28347	3.61866	78.83	1.54e-12	3.74e-10	Treg_IK_StimVSTreg_IK_Unstim	ENSMUST00000150029	Reps1-002
OCR_83918	chr4	154551980	154553114	-1.07448	4.6021	78.1702	1.78e-12	4.24e-10	Treg_IK_StimVSTreg_IK_Unstim	ENSMUST00000129314	Ski-002
OCR_100573	chr7	56888420	56889360	-1.01948	4.8066	78.1708	1.78e-12	4.24e-10	Treg_IK_StimVSTreg_IK_Unstim	ENSMUST00000032717	Dbx1-001
OCR_75722	chr3	145579272	145580320	-1.0155	4.69141	78.1091	1.8e-12	4.28e-10	Treg_IK_StimVSTreg_IK_Unstim	ENSMUST00000170398	Bcl10-202
OCR_65529	chr2	116797768	116798592	-1.01293	4.84733	77.9327	1.87e-12	4.41e-10	Treg_IK_StimVSTreg_IK_Unstim	ENSMUST00000083860	U1.95-201
OCR_93366	chr6	56881332	56882880	-1.43482	3.29158	77.8984	1.89e-12	4.41e-10	Treg_IK_StimVSTreg_IK_Unstim	ENSMUST00000176838	Vmn1r4-001
OCR_104668	chr7	142733957	142734741	-1.13193	4.24266	77.8007	1.93e-12	4.47e-10	Treg_IK_StimVSTreg_IK_Unstim	ENSMUST00000169654	Ptpre-204
OCR_22857	chr12	29518868	29519726	-1.01041	5.00358	77.7283	1.96e-12	4.52e-10	Treg_IK_StimVSTreg_IK_Unstim	ENSMUST00000035657	Tssc1-201
OCR_53851	chr18	14825334	14826127	-1.07194	4.63413	77.5743	2.03e-12	4.65e-10	Treg_IK_StimVSTreg_IK_Unstim	ENSMUST00000040964	Ss18-202
OCR_9722	chr10	18785074	18785393	-1.27428	3.78659	77.4298	2.09e-12	4.78e-10	Treg_IK_StimVSTreg_IK_Unstim	ENSMUST00000122863	Tnfaip3-004
OCR_26433	chr12	109158803	109160213	-1.02982	4.91446	77.2621	2.17e-12	4.9e-10	Treg_IK_StimVSTreg_IK_Unstim	ENSMUST00000109887	Bcl11b-002
OCR_63560	chr2	72119898	72120694	-1.22849	3.79765	77.1903	2.21e-12	4.96e-10	Treg_IK_StimVSTreg_IK_Unstim	ENSMUST00000090824	B230120H23Rik-001
OCR_41036	chr15	65562673	65563249	-1.26698	3.89611	77.069	2.27e-12	5.06e-10	Treg_IK_StimVSTreg_IK_Unstim	ENSMUST00000104595	U2.25-201
OCR_80558	chr4	100874935	100875776	-1.12781	4.44362	76.9359	2.34e-12	5.19e-10	Treg_IK_StimVSTreg_IK_Unstim	ENSMUST00000122052	Gm12785-001
OCR_95046	chr6	94615738	94616025	-1.57875	3.35716	81.5996	2.41e-12	5.29e-10	Treg_IK_StimVSTreg_IK_Unstim	ENSMUST00000150811	Lrig1-003
OCR_77747	chr4	32304000	32304425	-1.30163	3.59119	76.7613	2.43e-12	5.3e-10	Treg_IK_StimVSTreg_IK_Unstim	ENSMUST00000118175	Gm11929-001
OCR_99062	chr7	19911032	19911584	-1.18066	4.07352	76.7708	2.42e-12	5.3e-10	Treg_IK_StimVSTreg_IK_Unstim	ENSMUST00000003640	Fosb-201
OCR_4868	chr1	130508349	130508824	-1.17191	4.74017	85.3193	2.52e-12	5.47e-10	Treg_IK_StimVSTreg_IK_Unstim	ENSMUST00000142893	Cxcr4-002
OCR_35632	chr14	54845450	54845657	-1.39329	3.41261	76.1392	2.79e-12	5.98e-10	Treg_IK_StimVSTreg_IK_Unstim	ENSMUST00000103740	Trac-201
OCR_14030	chr10	95860956	95861562	-1.09058	4.57347	75.9898	2.89e-12	6.17e-10	Treg_IK_StimVSTreg_IK_Unstim	ENSMUST00000038377	Btg1-201
OCR_107681	chr8	67204643	67205583	1.20419	3.68867	75.9148	2.93e-12	6.24e-10	Treg_IK_StimVSTreg_IK_Unstim	ENSMUST00000140861	Sc4mol-006
OCR_116367	chr9	119991596	119992473	-1.15798	4.25955	75.869	2.96e-12	6.28e-10	Treg_IK_StimVSTreg_IK_Unstim	ENSMUST00000048777	Ccr8-201
OCR_34406	chr14	26674747	26675320	-1.01836	4.76387	75.7906	3.02e-12	6.37e-10	Treg_IK_StimVSTreg_IK_Unstim	ENSMUST00000124704	Anxa11-002
OCR_36266	chr14	66876342	66876957	-1.02219	5.1992	79.6767	3.24e-12	6.8e-10	Treg_IK_StimVSTreg_IK_Unstim	ENSMUST00000111121	Ptk2b-007
OCR_102832	chr7	108614579	108615687	-1.24277	6.20249	116.071	3.25e-12	6.8e-10	Treg_IK_StimVSTreg_IK_Unstim	ENSMUST00000083512	Mir139-201
OCR_112401	chr9	32423417	32423941	-1.46434	4.2533	93.4385	3.27e-12	6.81e-10	Treg_IK_StimVSTreg_IK_Unstim	ENSMUST00000058892	Ets1-203
OCR_8113	chr1	187017275	187017843	-1.25469	3.69876	75.3243	3.35e-12	6.95e-10	Treg_IK_StimVSTreg_IK_Unstim	ENSMUST00000069652	Rab3gap2-201
OCR_47738	chr16	91490906	91491608	-1.12134	4.39284	75.1614	3.79e-12	7.75e-10	Treg_IK_StimVSTreg_IK_Unstim	ENSMUST00000129878	Ifnar1-005
OCR_99649	chr7	31213889	31214658	1.87259	2.35399	74.755	3.81e-12	7.77e-10	Treg_IK_StimVSTreg_IK_Unstim	ENSMUST00000153042	Nfkbid-004
OCR_51998	chr17	71335305	71335713	-1.04815	4.4899	74.7015	3.86e-12	7.84e-10	Treg_IK_StimVSTreg_IK_Unstim	ENSMUST00000131820	Myl12b-002
OCR_3128	chr1	82832834	82833397	-1.07821	4.35649	74.6814	3.87e-12	7.84e-10	Treg_IK_StimVSTreg_IK_Unstim	ENSMUST00000177110	AC138214.1-201
OCR_60091	chr2	6490136	6490751	-1.18262	3.72815	74.6639	3.89e-12	7.85e-10	Treg_IK_StimVSTreg_IK_Unstim	ENSMUST00000168146	Celf2-203
OCR_102588	chr7	105640174	105640774	-1.04382	4.67095	74.51	4.03e-12	8.07e-10	Treg_IK_StimVSTreg_IK_Unstim	ENSMUST00000165205	Lrrc32-201
OCR_114049	chr9	69197027	69197894	-1.15399	4.0092	74.3776	4.15e-12	8.29e-10	Treg_IK_StimVSTreg_IK_Unstim	ENSMUST00000169688	Rora-201
OCR_102306	chr7	97497603	97497976	-1.21908	4.25421	75.0724	4.25e-12	8.46e-10	Treg_IK_StimVSTreg_IK_Unstim	ENSMUST00000032846	Sytl2-201
OCR_7800	chr1	182264660	182265078	-1.47402	3.30683	74.4891	4.43e-12	8.73e-10	Treg_IK_StimVSTreg_IK_Unstim	ENSMUST00000050581	Gm5069-201
OCR_12531	chr10	75301756	75302412	-1.00441	4.86995	74.0607	4.46e-12	8.76e-10	Treg_IK_StimVSTreg_IK_Unstim	ENSMUST00000038257	Gstt2-201
OCR_27417	chr13	5863889	5864122	-1.01087	4.60686	74.0023	4.52e-12	8.85e-10	Treg_IK_StimVSTreg_IK_Unstim	ENSMUST00000000080	Klf6-201
OCR_17888	chr11	51889351	51890350	-1.04454	4.77831	74.4076	4.61e-12	9e-10	Treg_IK_StimVSTreg_IK_Unstim	ENSMUST00000020608	Ppp2ca-001
OCR_111063	chr8	129119999	129120446	-1.17891	4.09566	73.8885	4.64e-12	9.02e-10	Treg_IK_StimVSTreg_IK_Unstim	ENSMUST00000054960	Irf2bp2-201
OCR_12378	chr10	70861986	70862603	-1.14222	4.09587	73.8605	4.66e-12	9.05e-10	Treg_IK_StimVSTreg_IK_Unstim	ENSMUST00000145521	Ipmk-006
OCR_61136	chr2	26478471	26478967	-1.60932	2.88617	73.6463	4.9e-12	9.44e-10	Treg_IK_StimVSTreg_IK_Unstim	ENSMUST00000074240	Fam69b-001
OCR_102898	chr7	109470467	109471137	-1.42214	3.64148	73.6125	4.94e-12	9.48e-10	Treg_IK_StimVSTreg_IK_Unstim	ENSMUST00000033289	Stim1-201
OCR_63561	chr2	72120771	72121320	-1.34671	3.37085	73.58	4.97e-12	9.52e-10	Treg_IK_StimVSTreg_IK_Unstim	ENSMUST00000090824	B230120H23Rik-001
OCR_105890	chr8	14989610	14989863	-1.12382	4.39817	74.1035	4.99e-12	9.53e-10	Treg_IK_StimVSTreg_IK_Unstim	ENSMUST00000162444	Arhgef10-006
OCR_104927	chr7	146336933	146337721	-1.20394	3.79128	73.4839	5.08e-12	9.64e-10	Treg_IK_StimVSTreg_IK_Unstim	ENSMUST00000016125	Stk32c-001
OCR_33670	chr14	15185656	15186374	-1.52108	3.04638	73.3447	5.25e-12	9.86e-10	Treg_IK_StimVSTreg_IK_Unstim	ENSMUST00000170743	Il3ra-203
OCR_111409	chr9	7783668	7784216	-1.3441	3.55006	73.3093	5.29e-12	9.9e-10	Treg_IK_StimVSTreg_IK_Unstim	ENSMUST00000175907	CT030639.1-201
OCR_18640	chr11	68266239	68266624	-1.52654	2.81296	73.0403	5.62e-12	1.05e-09	Treg_IK_StimVSTreg_IK_Unstim	ENSMUST00000141716	Pik3r5-005
OCR_55546	chr18	56663901	56664932	-1.28304	3.69954	73.0436	5.62e-12	1.05e-09	Treg_IK_StimVSTreg_IK_Unstim	ENSMUST00000172902	Aldh7a1-009
OCR_95037	chr6	94596296	94596984	-1.12094	4.12218	72.9854	5.7e-12	1.05e-09	Treg_IK_StimVSTreg_IK_Unstim	ENSMUST00000150811	Lrig1-003
OCR_114046	chr9	69188198	69188687	-1.33186	3.47245	72.9765	5.71e-12	1.05e-09	Treg_IK_StimVSTreg_IK_Unstim	ENSMUST00000169688	Rora-201
OCR_16261	chr11	6604822	6605539	-1.15751	4.45574	75.1206	5.82e-12	1.07e-09	Treg_IK_StimVSTreg_IK_Unstim	ENSMUST00000119236	Gm11976-001
OCR_115080	chr9	95217057	95217706	-1.01269	5.10332	75.5968	5.83e-12	1.07e-09	Treg_IK_StimVSTreg_IK_Unstim	ENSMUST00000036267	Chst2-201
OCR_75072	chr3	135303851	135304522	-1.22775	3.8791	73.2498	5.86e-12	1.07e-09	Treg_IK_StimVSTreg_IK_Unstim	ENSMUST00000106276	Nfkb1-202
OCR_18641	chr11	68266803	68267210	-1.42788	3.14356	72.7441	6.02e-12	1.09e-09	Treg_IK_StimVSTreg_IK_Unstim	ENSMUST00000126876	Pik3r5-004
OCR_112442	chr9	32551917	32552210	-1.56774	3.17229	75.6837	6.02e-12	1.09e-09	Treg_IK_StimVSTreg_IK_Unstim	ENSMUST00000034534	Ets1-201
OCR_15231	chr10	119634042	119634786	-1.32988	5.0016	99.8977	6.36e-12	1.13e-09	Treg_IK_StimVSTreg_IK_Unstim	ENSMUST00000135106	Irak3-004
OCR_5531	chr1	140500279	140501101	-1.25581	3.58912	72.368	6.56e-12	1.16e-09	Treg_IK_StimVSTreg_IK_Unstim	ENSMUST00000166904	Nek7-202
OCR_21679	chr11	119795062	119795875	-1.15747	4.26687	72.3384	6.61e-12	1.16e-09	Treg_IK_StimVSTreg_IK_Unstim	ENSMUST00000143428	Gm11766-001
OCR_85231	chr5	32338026	32338663	1.46555	2.83967	72.3317	6.62e-12	1.16e-09	Treg_IK_StimVSTreg_IK_Unstim	ENSMUST00000130719	Bre-014
OCR_47985	chr16	94822925	94823623	-1.08346	4.87856	77.778	6.65e-12	1.16e-09	Treg_IK_StimVSTreg_IK_Unstim	ENSMUST00000119372	Gm15971-001
OCR_14263	chr10	99023845	99024706	-1.09685	3.96527	71.9927	7.16e-12	1.25e-09	Treg_IK_StimVSTreg_IK_Unstim	ENSMUST00000167243	Gad1-ps-201
OCR_2129	chr1	60976985	60977695	-1.06265	4.2154	71.8208	7.44e-12	1.29e-09	Treg_IK_StimVSTreg_IK_Unstim	ENSMUST00000144147	Ctla4-003
OCR_35635	chr14	54850735	54851180	-1.12188	4.16558	71.4174	8.17e-12	1.4e-09	Treg_IK_StimVSTreg_IK_Unstim	ENSMUST00000103740	Trac-201
OCR_16809	chr11	21063766	21065069	-1.09242	4.9411	78.7322	8.38e-12	1.43e-09	Treg_IK_StimVSTreg_IK_Unstim	ENSMUST00000101477	Peli1-002
OCR_92027	chr6	31035103	31035772	-1.50479	3.63766	78.843	8.36e-12	1.43e-09	Treg_IK_StimVSTreg_IK_Unstim	ENSMUST00000123757	Gm13834-001
OCR_23448	chr12	40375477	40376128	-1.60478	2.94768	71.6238	9.34e-12	1.58e-09	Treg_IK_StimVSTreg_IK_Unstim	ENSMUST00000104081	SNORA17.69-201
OCR_66118	chr2	127978096	127979613	-1.03928	4.97771	70.7676	9.5e-12	1.61e-09	Treg_IK_StimVSTreg_IK_Unstim	ENSMUST00000132201	Bcl2l11-007
OCR_95248	chr6	98975955	98976537	-1.16178	3.94133	70.1024	1.11e-11	1.85e-09	Treg_IK_StimVSTreg_IK_Unstim	ENSMUST00000175670	Foxp1-029
OCR_47851	chr16	92822004	92822545	-1.06548	4.16284	69.9414	1.15e-11	1.91e-09	Treg_IK_StimVSTreg_IK_Unstim	ENSMUST00000113957	Runx1-204
OCR_9385	chr10	12694192	12694869	-1.26069	3.51748	69.8117	1.19e-11	1.95e-09	Treg_IK_StimVSTreg_IK_Unstim	ENSMUST00000042861	Stx11-201
OCR_32501	chr13	108251018	108251808	-1.40059	3.23479	69.77	1.2e-11	1.96e-09	Treg_IK_StimVSTreg_IK_Unstim	ENSMUST00000061241	Apoo-ps-201
OCR_24617	chr12	74742161	74742582	-1.30285	3.43666	69.7237	1.21e-11	1.98e-09	Treg_IK_StimVSTreg_IK_Unstim	ENSMUST00000119092	Prkch-002
OCR_29841	chr13	55545213	55545741	-1.13477	4.1847	69.4096	1.31e-11	2.11e-09	Treg_IK_StimVSTreg_IK_Unstim	ENSMUST00000099482	Grk6-202
OCR_11908	chr10	61740209	61741107	-1.17463	3.95829	69.2958	1.34e-11	2.13e-09	Treg_IK_StimVSTreg_IK_Unstim	ENSMUST00000161160	Hk1-019
OCR_25849	chr12	99840384	99840772	-1.51661	2.71681	69.314	1.34e-11	2.13e-09	Treg_IK_StimVSTreg_IK_Unstim	ENSMUST00000158726	U7.99-201
OCR_112441	chr9	32551163	32551817	-1.37904	5.30112	109.795	1.34e-11	2.13e-09	Treg_IK_StimVSTreg_IK_Unstim	ENSMUST00000034534	Ets1-201
OCR_75067	chr3	135291593	135292232	-1.23388	3.36402	69.1534	1.39e-11	2.19e-09	Treg_IK_StimVSTreg_IK_Unstim	ENSMUST00000129428	Nfkb1-003
OCR_87939	chr5	104189174	104190267	-1.03068	4.4505	69.1172	1.4e-11	2.19e-09	Treg_IK_StimVSTreg_IK_Unstim	ENSMUST00000031256	Aff1-201
OCR_49247	chr17	21611605	21612125	-1.05817	4.76071	72.5385	1.45e-11	2.24e-09	Treg_IK_StimVSTreg_IK_Unstim	ENSMUST00000168167	Gm17372-201
OCR_96958	chr6	128151409	128151732	-1.4216	3.06351	68.9711	1.45e-11	2.24e-09	Treg_IK_StimVSTreg_IK_Unstim	ENSMUST00000071101	Gm10010-201
OCR_58552	chr19	29541131	29542043	-1.06798	4.29334	68.8612	1.49e-11	2.29e-09	Treg_IK_StimVSTreg_IK_Unstim	ENSMUST00000152047	A930007I19Rik-201
OCR_63049	chr2	62228256	62228690	-1.20977	3.92233	69.287	1.54e-11	2.37e-09	Treg_IK_StimVSTreg_IK_Unstim	ENSMUST00000150979	Dpp4-004
OCR_67958	chr2	158543179	158543590	-1.07379	4.105	68.6816	1.55e-11	2.37e-09	Treg_IK_StimVSTreg_IK_Unstim	ENSMUST00000145073	Ppp1r16b-004
OCR_45176	chr16	32111171	32111777	-1.39064	3.19221	68.608	1.58e-11	2.4e-09	Treg_IK_StimVSTreg_IK_Unstim	ENSMUST00000125829	Gm15729-001
OCR_84764	chr5	22919497	22919810	-1.26781	3.32128	68.4899	1.62e-11	2.46e-09	Treg_IK_StimVSTreg_IK_Unstim	ENSMUST00000101522	5031425E22Rik-201
OCR_67596	chr2	152828123	152829178	-1.01597	4.21324	68.3246	1.69e-11	2.55e-09	Treg_IK_StimVSTreg_IK_Unstim	ENSMUST00000150218	Ttll9-006
OCR_101512	chr7	82514255	82514695	-1.67084	2.68088	69.8211	1.69e-11	2.55e-09	Treg_IK_StimVSTreg_IK_Unstim	ENSMUST00000165175	Sv2b-202
OCR_75270	chr3	137807352	137807528	-1.3692	3.21477	67.9708	1.84e-11	2.72e-09	Treg_IK_StimVSTreg_IK_Unstim	ENSMUST00000161141	Rg9mtd2-005
OCR_96011	chr6	114844441	114845111	-1.02133	4.46023	67.896	1.87e-11	2.77e-09	Treg_IK_StimVSTreg_IK_Unstim	ENSMUST00000152710	Vgll4-002
OCR_86720	chr5	72641223	72641925	1.34699	3.12031	67.7553	1.93e-11	2.84e-09	Treg_IK_StimVSTreg_IK_Unstim	ENSMUST00000094710	Atp10d-201
OCR_9412	chr10	12854183	12854619	-2.03447	2.14741	67.5468	2.03e-11	2.97e-09	Treg_IK_StimVSTreg_IK_Unstim	ENSMUST00000068371	Plagl1-201
OCR_87756	chr5	101345441	101345919	-1.23795	3.81354	67.2234	2.2e-11	3.16e-09	Treg_IK_StimVSTreg_IK_Unstim	ENSMUST00000142871	4930458D05Rik-001
OCR_52188	chr17	73596005	73596708	-1.11448	3.93291	67.2029	2.21e-11	3.17e-09	Treg_IK_StimVSTreg_IK_Unstim	ENSMUST00000134149	Lclat1-005
OCR_32528	chr13	108588207	108588812	-1.14719	3.63382	67.0934	2.26e-11	3.24e-09	Treg_IK_StimVSTreg_IK_Unstim	ENSMUST00000175593	AC165250.1-201
OCR_110939	chr8	127223356	127223988	-1.21898	3.80051	66.8942	2.38e-11	3.39e-09	Treg_IK_StimVSTreg_IK_Unstim	ENSMUST00000131633	Ttc13-006
OCR_7831	chr1	182340439	182340801	-1.49221	2.75712	66.7332	2.47e-11	3.51e-09	Treg_IK_StimVSTreg_IK_Unstim	ENSMUST00000136521	6330403A02Rik-001
OCR_5205	chr1	135971144	135971539	-1.54375	2.76003	66.6866	2.5e-11	3.54e-09	Treg_IK_StimVSTreg_IK_Unstim	ENSMUST00000020692	Btg2-001
OCR_92035	chr6	31065388	31065861	-1.55029	2.89488	66.6617	2.51e-11	3.54e-09	Treg_IK_StimVSTreg_IK_Unstim	ENSMUST00000146766	Gm13833-001
OCR_83122	chr4	144487474	144488416	-1.03615	4.59203	67.9741	2.59e-11	3.63e-09	Treg_IK_StimVSTreg_IK_Unstim	ENSMUST00000084184	Dhrs3-003
OCR_100694	chr7	63215809	63216277	-1.17798	3.93367	66.3909	2.68e-11	3.74e-09	Treg_IK_StimVSTreg_IK_Unstim	ENSMUST00000143325	Nipa2-008
OCR_155	chr1	9531384	9531679	-1.03162	4.30321	66.2963	2.74e-11	3.81e-09	Treg_IK_StimVSTreg_IK_Unstim	ENSMUST00000072079	Rrs1-201
OCR_51131	chr17	52307575	52308530	-1.16971	4.06734	66.2719	2.76e-11	3.83e-09	Treg_IK_StimVSTreg_IK_Unstim	ENSMUST00000104873	AC121600.1-201
OCR_95686	chr6	108288204	108288909	-1.15907	3.71115	66.1436	2.85e-11	3.92e-09	Treg_IK_StimVSTreg_IK_Unstim	ENSMUST00000166013	Itpr1-206
OCR_7786	chr1	182194528	182195356	-1.22233	4.64388	78.5385	3.19e-11	4.36e-09	Treg_IK_StimVSTreg_IK_Unstim	ENSMUST00000133340	Psen2-006
OCR_83844	chr4	153532988	153533459	-1.01865	4.30738	65.3858	3.42e-11	4.63e-09	Treg_IK_StimVSTreg_IK_Unstim	ENSMUST00000136374	Tprgl-003
OCR_90782	chr5	149561629	149562293	-1.19663	3.29957	65.2987	3.49e-11	4.72e-09	Treg_IK_StimVSTreg_IK_Unstim	ENSMUST00000122564	n-R5s179-201
OCR_111876	chr9	20414114	20414752	-1.59417	2.72606	65.2265	3.56e-11	4.79e-09	Treg_IK_StimVSTreg_IK_Unstim	ENSMUST00000170938	5730577I03Rik-003
OCR_32304	chr13	104902608	104903128	-1.17489	3.49199	65.1854	3.59e-11	4.82e-09	Treg_IK_StimVSTreg_IK_Unstim	ENSMUST00000159574	Sgtb-003
OCR_59392	chr19	47989709	47990193	-1.15527	3.71108	65.017	3.74e-11	4.99e-09	Treg_IK_StimVSTreg_IK_Unstim	ENSMUST00000175225	AC126679.1-201
OCR_33279	chr14	8821822	8822418	-1.21701	4.13488	72.0284	3.83e-11	5.09e-09	Treg_IK_StimVSTreg_IK_Unstim	ENSMUST00000026315	Dnase1l3-001
OCR_32539	chr13	108647057	108647901	-1.03095	4.26212	64.8688	3.88e-11	5.14e-09	Treg_IK_StimVSTreg_IK_Unstim	ENSMUST00000175593	AC165250.1-201
OCR_91047	chr6	5245092	5245372	-1.05677	3.86442	64.8266	3.92e-11	5.18e-09	Treg_IK_StimVSTreg_IK_Unstim	ENSMUST00000123838	Pon2-002
OCR_19823	chr11	90210810	90212315	-1.38009	3.43066	66.8456	3.93e-11	5.18e-09	Treg_IK_StimVSTreg_IK_Unstim	ENSMUST00000137957	Hlf-005
OCR_16485	chr11	11619789	11620196	-1.32555	3.52045	66.6286	3.98e-11	5.23e-09	Treg_IK_StimVSTreg_IK_Unstim	ENSMUST00000168214	Ikzf1-207
OCR_34135	chr14	22342471	22342975	-1.18056	3.513	64.7587	3.98e-11	5.23e-09	Treg_IK_StimVSTreg_IK_Unstim	ENSMUST00000112458	Myst4-203
OCR_20799	chr11	106425399	106426115	-1.29609	3.54419	65.698	4e-11	5.24e-09	Treg_IK_StimVSTreg_IK_Unstim	ENSMUST00000158896	snosnR60_Z15.1-201
OCR_63047	chr2	62190083	62190866	-1.03824	4.42525	64.8204	4.13e-11	5.4e-09	Treg_IK_StimVSTreg_IK_Unstim	ENSMUST00000136879	Gm13561-001
OCR_115699	chr9	107577974	107579079	-1.05326	4.23657	64.5842	4.16e-11	5.42e-09	Treg_IK_StimVSTreg_IK_Unstim	ENSMUST00000010205	Gnat1-201
OCR_111738	chr9	14799726	14800472	-1.15869	4.97892	81.6398	4.21e-11	5.48e-09	Treg_IK_StimVSTreg_IK_Unstim	ENSMUST00000166933	Panx1-003
OCR_47911	chr16	93780593	93781282	-1.24284	3.68989	64.9071	4.23e-11	5.49e-09	Treg_IK_StimVSTreg_IK_Unstim	ENSMUST00000165796	2310043M15Rik-201
OCR_114063	chr9	69305797	69306451	-1.11003	3.70471	64.2354	4.53e-11	5.83e-09	Treg_IK_StimVSTreg_IK_Unstim	ENSMUST00000175301	Mir3109-201
OCR_20435	chr11	100685242	100685675	-1.20283	3.86833	64.2201	4.55e-11	5.84e-09	Treg_IK_StimVSTreg_IK_Unstim	ENSMUST00000107358	Stat5b-002
OCR_108030	chr8	73387665	73388182	1.40064	3.01112	63.6773	5.2e-11	6.56e-09	Treg_IK_StimVSTreg_IK_Unstim	ENSMUST00000050921	A230052G05Rik-201
OCR_69093	chr2	174159057	174159758	-1.14945	3.73959	63.5888	5.31e-11	6.69e-09	Treg_IK_StimVSTreg_IK_Unstim	ENSMUST00000109083	Gnas-018
OCR_49881	chr17	30655714	30656372	-1.66492	2.76595	63.8496	5.47e-11	6.88e-09	Treg_IK_StimVSTreg_IK_Unstim	ENSMUST00000064223	Gm9874-201
OCR_86801	chr5	73626162	73626744	-1.47557	2.8519	63.3431	5.64e-11	7.04e-09	Treg_IK_StimVSTreg_IK_Unstim	ENSMUST00000148433	Fryl-005
OCR_92031	chr6	31050332	31051158	-1.29372	3.45369	63.5762	5.64e-11	7.04e-09	Treg_IK_StimVSTreg_IK_Unstim	ENSMUST00000146766	Gm13833-001
OCR_19653	chr11	87284803	87285647	-1.35095	3.00842	63.2765	5.74e-11	7.12e-09	Treg_IK_StimVSTreg_IK_Unstim	ENSMUST00000083748	U3.7-201
OCR_84242	chr5	8838766	8839518	-1.01344	4.44495	63.1312	5.95e-11	7.32e-09	Treg_IK_StimVSTreg_IK_Unstim	ENSMUST00000152470	Gm5106-201
OCR_104044	chr7	132724124	132724325	-1.42978	2.96587	63.1445	5.93e-11	7.32e-09	Treg_IK_StimVSTreg_IK_Unstim	ENSMUST00000163585	Il4ra-203
OCR_78066	chr4	40667968	40668387	-1.13471	4.17786	65.5188	6.18e-11	7.57e-09	Treg_IK_StimVSTreg_IK_Unstim	ENSMUST00000139406	Dnaja1-003
OCR_24597	chr12	74691791	74692034	-1.88089	2.09104	62.9354	6.24e-11	7.62e-09	Treg_IK_StimVSTreg_IK_Unstim	ENSMUST00000119092	Prkch-002
OCR_38763	chr15	6079313	6080477	-1.07584	3.99012	62.8861	6.32e-11	7.7e-09	Treg_IK_StimVSTreg_IK_Unstim	ENSMUST00000104217	SNORA17.133-201
OCR_77659	chr4	26274404	26274750	-1.23178	4.16949	69.0954	6.5e-11	7.85e-09	Treg_IK_StimVSTreg_IK_Unstim	ENSMUST00000041374	Manea-001
OCR_49299	chr17	23330528	23330819	-1.06176	4.08084	62.3716	7.18e-11	8.65e-09	Treg_IK_StimVSTreg_IK_Unstim	ENSMUST00000037057	Zfp40-001
OCR_112446	chr9	32557735	32558118	-1.25095	3.2937	62.3156	7.28e-11	8.75e-09	Treg_IK_StimVSTreg_IK_Unstim	ENSMUST00000034534	Ets1-201
OCR_71319	chr3	52066269	52067112	-1.229	3.45694	62.2834	7.34e-11	8.8e-09	Treg_IK_StimVSTreg_IK_Unstim	ENSMUST00000053764	Foxo1-001
OCR_51695	chr17	66278591	66279219	-1.12834	3.56622	62.1591	7.57e-11	9.03e-09	Treg_IK_StimVSTreg_IK_Unstim	ENSMUST00000024906	Twsg1-201
OCR_8039	chr1	185875927	185876540	-1.35706	3.38806	62.518	7.98e-11	9.49e-09	Treg_IK_StimVSTreg_IK_Unstim	ENSMUST00000048655	Dusp10-001
OCR_89231	chr5	123400566	123400982	-1.19787	3.42035	61.731	8.43e-11	9.92e-09	Treg_IK_StimVSTreg_IK_Unstim	ENSMUST00000147544	Kdm2b-014
OCR_39056	chr15	11937681	11938301	-1.09791	4.21644	62.2097	8.55e-11	1e-08	Treg_IK_StimVSTreg_IK_Unstim	ENSMUST00000110504	Sub1-002
OCR_45445	chr16	36602568	36603291	-1.11789	3.91571	62.5141	9.05e-11	1.06e-08	Treg_IK_StimVSTreg_IK_Unstim	ENSMUST00000154485	Cd86-004
OCR_97529	chr6	136893023	136893453	-1.53687	3.60718	73.9691	9.15e-11	1.06e-08	Treg_IK_StimVSTreg_IK_Unstim	ENSMUST00000111891	Arhgdib-003
OCR_7816	chr1	182301049	182301617	-1.22159	3.26657	61.3392	9.3e-11	1.08e-08	Treg_IK_StimVSTreg_IK_Unstim	ENSMUST00000050581	Gm5069-201
OCR_67135	chr2	146431952	146432430	-1.81338	2.13986	61.1609	9.73e-11	1.12e-08	Treg_IK_StimVSTreg_IK_Unstim	ENSMUST00000157276	U3.20-201
OCR_103941	chr7	130115661	130116216	-1.13536	3.79102	61.1484	9.76e-11	1.12e-08	Treg_IK_StimVSTreg_IK_Unstim	ENSMUST00000071590	Rbbp6-002
OCR_29257	chr13	44412891	44413278	-1.57248	2.49137	61.0371	1e-10	1.15e-08	Treg_IK_StimVSTreg_IK_Unstim	ENSMUST00000159595	Gm5083-002
OCR_26111	chr12	103914365	103914744	-1.30084	3.14896	61.0149	1.01e-10	1.15e-08	Treg_IK_StimVSTreg_IK_Unstim	ENSMUST00000158699	Mir1936-201
OCR_14736	chr10	111361171	111361947	-1.15136	3.94997	60.9412	1.03e-10	1.17e-08	Treg_IK_StimVSTreg_IK_Unstim	ENSMUST00000163048	Krr1-001
OCR_92404	chr6	38302422	38302727	-1.21217	3.50266	60.8691	1.05e-10	1.19e-08	Treg_IK_StimVSTreg_IK_Unstim	ENSMUST00000114900	Zc3hav1-004
OCR_29534	chr13	49368217	49368623	-1.32355	3.15884	60.7218	1.09e-10	1.22e-08	Treg_IK_StimVSTreg_IK_Unstim	ENSMUST00000021816	Susd3-002
OCR_24127	chr12	60111569	60111821	-1.34933	3.2174	60.4854	1.15e-10	1.29e-08	Treg_IK_StimVSTreg_IK_Unstim	ENSMUST00000021375	Sec23a-001
OCR_19644	chr11	87256662	87257424	-1.18435	3.97642	64.0083	1.24e-10	1.37e-08	Treg_IK_StimVSTreg_IK_Unstim	ENSMUST00000093738	U3.10-201
OCR_15254	chr10	119992991	119993735	-1.02175	4.06903	60.1262	1.26e-10	1.4e-08	Treg_IK_StimVSTreg_IK_Unstim	ENSMUST00000158299	SNORA17.510-201
OCR_48810	chr17	12556453	12557573	-1.03025	4.14621	60.0352	1.29e-10	1.43e-08	Treg_IK_StimVSTreg_IK_Unstim	ENSMUST00000014578	Plg-201
OCR_32818	chr13	112770405	112770797	-1.20518	3.0995	59.7991	1.37e-10	1.5e-08	Treg_IK_StimVSTreg_IK_Unstim	ENSMUST00000142621	Gm15322-001
OCR_34356	chr14	26295389	26295894	-1.26978	3.31161	59.7564	1.39e-10	1.51e-08	Treg_IK_StimVSTreg_IK_Unstim	ENSMUST00000156682	D930049A15Rik-001
OCR_79967	chr4	87651659	87652121	-1.2556	3.67148	61.421	1.4e-10	1.52e-08	Treg_IK_StimVSTreg_IK_Unstim	ENSMUST00000141526	Mllt3-005
OCR_76991	chr4	8727175	8727472	-1.50044	3.07338	60.9436	1.44e-10	1.55e-08	Treg_IK_StimVSTreg_IK_Unstim	ENSMUST00000130709	Chd7-004
OCR_83078	chr4	142733302	142734010	-1.13516	3.81452	59.835	1.47e-10	1.58e-08	Treg_IK_StimVSTreg_IK_Unstim	ENSMUST00000119886	Gm13038-001
OCR_103431	chr7	121237047	121237663	-1.30066	3.8309	59.5049	1.48e-10	1.58e-08	Treg_IK_StimVSTreg_IK_Unstim	ENSMUST00000069449	Rras2-201
OCR_13717	chr10	92807905	92808720	-1.02838	4.54761	63.6464	1.51e-10	1.6e-08	Treg_IK_StimVSTreg_IK_Unstim	ENSMUST00000008542	Elk3-001
OCR_22561	chr12	21148170	21149044	-1.05988	3.67298	59.3603	1.54e-10	1.63e-08	Treg_IK_StimVSTreg_IK_Unstim	ENSMUST00000050990	Asap2-006
OCR_64564	chr2	93251344	93251952	-1.18382	3.39678	59.2696	1.57e-10	1.66e-08	Treg_IK_StimVSTreg_IK_Unstim	ENSMUST00000137073	Gm13807-001
OCR_39302	chr15	25201748	25202013	1.73167	2.33263	59.9412	1.6e-10	1.67e-08	Treg_IK_StimVSTreg_IK_Unstim	ENSMUST00000056401	9230109A22Rik-201
OCR_97044	chr6	129175216	129175714	1.46728	2.65535	59.1953	1.6e-10	1.67e-08	Treg_IK_StimVSTreg_IK_Unstim	ENSMUST00000131466	2310001H17Rik-201
OCR_93355	chr6	56750250	56750565	-1.35357	3.13451	59.168	1.61e-10	1.68e-08	Treg_IK_StimVSTreg_IK_Unstim	ENSMUST00000114321	Kbtbd2-002
OCR_25828	chr12	99509121	99509516	-1.24465	3.21413	59.149	1.62e-10	1.69e-08	Treg_IK_StimVSTreg_IK_Unstim	ENSMUST00000075072	Gpr65-201
OCR_81676	chr4	122545330	122545727	1.30779	3.0071	59.094	1.64e-10	1.71e-08	Treg_IK_StimVSTreg_IK_Unstim	ENSMUST00000150919	Cap1-007
OCR_99478	chr7	29229376	29230230	-1.26096	3.35288	59.0271	1.67e-10	1.73e-08	Treg_IK_StimVSTreg_IK_Unstim	ENSMUST00000164951	Gmfg-201
OCR_56932	chr18	80879431	80880045	-1.07609	3.84905	59.0187	1.68e-10	1.73e-08	Treg_IK_StimVSTreg_IK_Unstim	ENSMUST00000167977	Nfatc1-203
OCR_110513	chr8	122472166	122472909	-1.03949	3.97398	58.8787	1.74e-10	1.78e-08	Treg_IK_StimVSTreg_IK_Unstim	ENSMUST00000142432	Usp10-006
OCR_67961	chr2	158549552	158549882	-1.12494	3.82704	58.8365	1.76e-10	1.8e-08	Treg_IK_StimVSTreg_IK_Unstim	ENSMUST00000175299	AL663077.1-201
OCR_29058	chr13	40771814	40772628	-1.12513	3.66617	58.777	1.78e-10	1.83e-08	Treg_IK_StimVSTreg_IK_Unstim	ENSMUST00000069457	Gm9979-201
OCR_50267	chr17	35367982	35368498	-1.16878	3.45432	58.7324	1.8e-10	1.84e-08	Treg_IK_StimVSTreg_IK_Unstim	ENSMUST00000146711	Atp6v1g2-002
OCR_92973	chr6	50341984	50342321	-1.26711	3.18148	58.6744	1.83e-10	1.87e-08	Treg_IK_StimVSTreg_IK_Unstim	ENSMUST00000136926	Osbpl3-006
OCR_47630	chr16	89974588	89974971	-1.04064	3.96891	58.637	1.85e-10	1.88e-08	Treg_IK_StimVSTreg_IK_Unstim	ENSMUST00000114124	Tiam1-001
OCR_80676	chr4	102768428	102768922	-1.34366	3.01753	58.5277	1.9e-10	1.92e-08	Treg_IK_StimVSTreg_IK_Unstim	ENSMUST00000119011	Gm12710-001
OCR_66113	chr2	127943034	127943921	-1.1884	3.26576	58.2774	2.03e-10	2.03e-08	Treg_IK_StimVSTreg_IK_Unstim	ENSMUST00000146023	Bcl2l11-002
OCR_50193	chr17	34728972	34729900	1.04485	3.9969	58.2481	2.04e-10	2.05e-08	Treg_IK_StimVSTreg_IK_Unstim	ENSMUST00000038149	Pbx2-001
OCR_9409	chr10	12851922	12852394	-1.79532	2.14096	58.1074	2.12e-10	2.11e-08	Treg_IK_StimVSTreg_IK_Unstim	ENSMUST00000068371	Plagl1-201
OCR_111408	chr9	7779965	7780595	-1.06225	4.08904	58.0541	2.15e-10	2.14e-08	Treg_IK_StimVSTreg_IK_Unstim	ENSMUST00000175907	CT030639.1-201
OCR_113262	chr9	51046785	51047593	-1.18372	3.31098	58.009	2.17e-10	2.16e-08	Treg_IK_StimVSTreg_IK_Unstim	ENSMUST00000034554	Pou2af1-201
OCR_47772	chr16	91826031	91826875	-1.01852	3.86085	57.6731	2.37e-10	2.33e-08	Treg_IK_StimVSTreg_IK_Unstim	ENSMUST00000144101	Itsn1-025
OCR_42083	chr15	81132572	81133161	-1.02073	3.98094	57.5834	2.43e-10	2.37e-08	Treg_IK_StimVSTreg_IK_Unstim	ENSMUST00000023040	Slc25a17-201
OCR_13694	chr10	92705658	92706045	-1.32058	2.86863	57.4196	2.53e-10	2.47e-08	Treg_IK_StimVSTreg_IK_Unstim	ENSMUST00000170355	Cdk17-202
OCR_30882	chr13	78301277	78301785	-1.21584	3.16688	57.3352	2.59e-10	2.51e-08	Treg_IK_StimVSTreg_IK_Unstim	ENSMUST00000135284	Nr2f1-005
OCR_41033	chr15	65468859	65469669	-1.20831	3.53062	57.3021	2.61e-10	2.53e-08	Treg_IK_StimVSTreg_IK_Unstim	ENSMUST00000104595	U2.25-201
OCR_54346	chr18	31787989	31788691	-1.07298	3.76172	56.9971	2.83e-10	2.71e-08	Treg_IK_StimVSTreg_IK_Unstim	ENSMUST00000025109	Sap130-201
OCR_55573	chr18	56897655	56897830	-1.70257	2.53083	60.3813	2.87e-10	2.74e-08	Treg_IK_StimVSTreg_IK_Unstim	ENSMUST00000128651	Lmnb1-002
OCR_99826	chr7	36020347	36020768	-1.05922	3.64647	56.9449	2.87e-10	2.74e-08	Treg_IK_StimVSTreg_IK_Unstim	ENSMUST00000175893	AC150683.1-201
OCR_47077	chr16	76339276	76340019	-1.02027	4.02577	56.674	3.08e-10	2.88e-08	Treg_IK_StimVSTreg_IK_Unstim	ENSMUST00000140483	Nrip1-006
OCR_71798	chr3	61213149	61214275	-1.02409	5.54865	71.4659	3.08e-10	2.88e-08	Treg_IK_StimVSTreg_IK_Unstim	ENSMUST00000158407	U7.79-201
OCR_92024	chr6	31029591	31030053	-1.11863	3.62186	56.6876	3.07e-10	2.88e-08	Treg_IK_StimVSTreg_IK_Unstim	ENSMUST00000123757	Gm13834-001
OCR_54213	chr18	24832331	24833087	-1.40057	2.88514	56.4381	3.27e-10	3.03e-08	Treg_IK_StimVSTreg_IK_Unstim	ENSMUST00000122523	n-R5s23-201
OCR_101573	chr7	82787130	82787636	-1.07168	3.66499	56.4251	3.29e-10	3.03e-08	Treg_IK_StimVSTreg_IK_Unstim	ENSMUST00000137959	Akap13-007
OCR_58436	chr19	25130114	25130404	-1.3841	3.05129	56.63	3.4e-10	3.12e-08	Treg_IK_StimVSTreg_IK_Unstim	ENSMUST00000025831	Dock8-201
OCR_92044	chr6	31093055	31093682	-1.74964	2.22868	55.989	3.68e-10	3.32e-08	Treg_IK_StimVSTreg_IK_Unstim	ENSMUST00000118459	Gm13835-001
OCR_59132	chr19	44357013	44357489	-1.03247	4.13428	56.303	3.84e-10	3.45e-08	Treg_IK_StimVSTreg_IK_Unstim	ENSMUST00000175242	AC123853.1-201
OCR_68647	chr2	168405685	168406328	-1.12584	3.69544	55.802	3.87e-10	3.47e-08	Treg_IK_StimVSTreg_IK_Unstim	ENSMUST00000029057	Nfatc2-005
OCR_68981	chr2	172856039	172856640	-1.10998	4.26285	60.0049	4e-10	3.58e-08	Treg_IK_StimVSTreg_IK_Unstim	ENSMUST00000139677	Gm14453-001
OCR_9402	chr10	12782225	12782579	-1.12352	3.46478	55.655	4.02e-10	3.58e-08	Treg_IK_StimVSTreg_IK_Unstim	ENSMUST00000123135	Plagl1-007
OCR_48843	chr17	12972298	12972731	-1.0157	3.85528	55.6513	4.03e-10	3.58e-08	Treg_IK_StimVSTreg_IK_Unstim	ENSMUST00000158900	7SK.321-201
OCR_77992	chr4	35174084	35174310	-1.30907	3.35498	56.7383	4.08e-10	3.62e-08	Treg_IK_StimVSTreg_IK_Unstim	ENSMUST00000156472	3110043O21Rik-003
OCR_78429	chr4	46584379	46585039	-1.15311	3.47612	55.566	4.12e-10	3.64e-08	Treg_IK_StimVSTreg_IK_Unstim	ENSMUST00000107757	Coro2a-002
OCR_105889	chr8	14989278	14989511	-1.09974	3.80153	55.6848	4.19e-10	3.69e-08	Treg_IK_StimVSTreg_IK_Unstim	ENSMUST00000162444	Arhgef10-006
OCR_1460	chr1	43823158	43823594	1.33068	2.69271	55.4865	4.21e-10	3.7e-08	Treg_IK_StimVSTreg_IK_Unstim	ENSMUST00000163003	Gm16103-001
OCR_20305	chr11	98800883	98801164	-1.1988	3.53536	55.4746	4.22e-10	3.7e-08	Treg_IK_StimVSTreg_IK_Unstim	ENSMUST00000164748	Rara-201
OCR_104125	chr7	133763078	133763621	-1.34372	2.79386	55.4623	4.23e-10	3.71e-08	Treg_IK_StimVSTreg_IK_Unstim	ENSMUST00000032961	Nupr1-001
OCR_33812	chr14	17196577	17196932	-1.06154	4.08834	56.7566	4.4e-10	3.82e-08	Treg_IK_StimVSTreg_IK_Unstim	ENSMUST00000017629	Top2b-001
OCR_101510	chr7	82507114	82507866	-1.03872	4.17241	55.805	4.46e-10	3.87e-08	Treg_IK_StimVSTreg_IK_Unstim	ENSMUST00000165175	Sv2b-202
OCR_53007	chr17	87357282	87357670	-1.09902	3.38825	55.1488	4.6e-10	3.97e-08	Treg_IK_StimVSTreg_IK_Unstim	ENSMUST00000024956	Rhoq-001
OCR_33668	chr14	15180800	15181123	-1.0382	3.84217	55.1221	4.63e-10	4e-08	Treg_IK_StimVSTreg_IK_Unstim	ENSMUST00000170743	Il3ra-203
OCR_59468	chr19	53553826	53554589	1.14904	3.27402	55.0839	4.68e-10	4.03e-08	Treg_IK_StimVSTreg_IK_Unstim	ENSMUST00000166767	5830416P10Rik-203
OCR_26861	chr12	114463019	114463521	-1.40705	2.72915	55.0492	4.72e-10	4.05e-08	Treg_IK_StimVSTreg_IK_Unstim	ENSMUST00000157217	U6.606-201
OCR_111611	chr9	13660763	13661571	1.3688	2.80678	54.9777	4.81e-10	4.1e-08	Treg_IK_StimVSTreg_IK_Unstim	ENSMUST00000130106	Fam76b-003
OCR_64565	chr2	93253530	93254116	-1.17161	3.38216	54.8467	4.99e-10	4.21e-08	Treg_IK_StimVSTreg_IK_Unstim	ENSMUST00000126772	Cd82-010
OCR_54437	chr18	33117799	33118252	-1.40125	2.88768	54.8071	5.04e-10	4.22e-08	Treg_IK_StimVSTreg_IK_Unstim	ENSMUST00000124871	2310026I22Rik-201
OCR_14933	chr10	116367551	116368393	-1.09397	4.81067	67.3899	5.1e-10	4.25e-08	Treg_IK_StimVSTreg_IK_Unstim	ENSMUST00000166934	Rab3ip-202
OCR_102120	chr7	91297412	91297872	-1.1583	3.48134	54.7683	5.09e-10	4.25e-08	Treg_IK_StimVSTreg_IK_Unstim	ENSMUST00000131505	Fam108c-002
OCR_77758	chr4	32349979	32350335	-1.36164	2.79074	54.6805	5.21e-10	4.33e-08	Treg_IK_StimVSTreg_IK_Unstim	ENSMUST00000133451	Gm11932-001
OCR_88106	chr5	106268840	106269524	-1.33371	2.86321	54.6793	5.21e-10	4.33e-08	Treg_IK_StimVSTreg_IK_Unstim	ENSMUST00000055994	D830014E11Rik-201
OCR_41323	chr15	72967571	72967783	-1.1452	3.32726	54.6404	5.27e-10	4.37e-08	Treg_IK_StimVSTreg_IK_Unstim	ENSMUST00000175696	Eif2c2-001
OCR_21099	chr11	113051721	113052255	-1.03621	4.02907	54.5812	5.35e-10	4.43e-08	Treg_IK_StimVSTreg_IK_Unstim	ENSMUST00000145206	2610035D17Rik-004
OCR_8040	chr1	185881209	185881663	-1.30478	3.12117	54.514	5.45e-10	4.5e-08	Treg_IK_StimVSTreg_IK_Unstim	ENSMUST00000048655	Dusp10-001
OCR_40628	chr15	57976611	57977430	-1.00787	3.92966	54.514	5.45e-10	4.5e-08	Treg_IK_StimVSTreg_IK_Unstim	ENSMUST00000116811	SNORA11.1-201
OCR_93390	chr6	57661714	57662488	-1.07457	3.69362	54.5136	5.45e-10	4.5e-08	Treg_IK_StimVSTreg_IK_Unstim	ENSMUST00000153777	Lancl2-003
OCR_3138	chr1	82865824	82866640	-1.18175	3.00428	54.3841	5.64e-10	4.64e-08	Treg_IK_StimVSTreg_IK_Unstim	ENSMUST00000063380	Agfg1-201
OCR_46214	chr16	52038287	52038930	-1.14103	3.53408	54.6445	5.68e-10	4.66e-08	Treg_IK_StimVSTreg_IK_Unstim	ENSMUST00000023313	Cblb-201
OCR_77984	chr4	35077386	35078391	-1.02358	3.88585	54.2998	5.77e-10	4.72e-08	Treg_IK_StimVSTreg_IK_Unstim	ENSMUST00000058595	Ifnk-001
OCR_110824	chr8	125560889	125561312	-1.25649	3.27238	54.286	5.79e-10	4.73e-08	Treg_IK_StimVSTreg_IK_Unstim	ENSMUST00000039345	Ankrd11-201
OCR_16147	chr11	5311523	5312052	-1.09145	3.77602	54.2657	5.82e-10	4.75e-08	Treg_IK_StimVSTreg_IK_Unstim	ENSMUST00000172492	Znrf3-002
OCR_34859	chr14	34257007	34257508	-1.13777	3.25963	53.9903	6.27e-10	5.06e-08	Treg_IK_StimVSTreg_IK_Unstim	ENSMUST00000111944	Mapk8-003
OCR_41333	chr15	72984193	72984381	-1.35185	3.03833	53.9402	6.35e-10	5.1e-08	Treg_IK_StimVSTreg_IK_Unstim	ENSMUST00000044113	Eif2c2-001
OCR_35602	chr14	54497922	54498795	-1.646	2.60326	53.8812	6.45e-10	5.17e-08	Treg_IK_StimVSTreg_IK_Unstim	ENSMUST00000103675	Trav21-dv12-001
OCR_52914	chr17	86063998	86064632	-1.09294	3.42793	53.8452	6.52e-10	5.2e-08	Treg_IK_StimVSTreg_IK_Unstim	ENSMUST00000024947	Six2-201
OCR_20975	chr11	109236158	109237224	-1.12108	3.70885	53.7696	6.65e-10	5.28e-08	Treg_IK_StimVSTreg_IK_Unstim	ENSMUST00000070956	Gm11696-001
OCR_101429	chr7	80756734	80757775	-1.11237	4.24249	55.3628	6.66e-10	5.28e-08	Treg_IK_StimVSTreg_IK_Unstim	ENSMUST00000083795	U6.362-201
OCR_31119	chr13	83868997	83869661	-1.1692	3.54924	54.7151	6.71e-10	5.29e-08	Treg_IK_StimVSTreg_IK_Unstim	ENSMUST00000171323	Gm17547-201
OCR_38204	chr14	119406081	119406277	-1.26723	3.04992	53.681	6.81e-10	5.35e-08	Treg_IK_StimVSTreg_IK_Unstim	ENSMUST00000131424	Uggt2-005
OCR_82378	chr4	133185134	133185550	-1.17158	3.29792	53.6424	6.88e-10	5.39e-08	Treg_IK_StimVSTreg_IK_Unstim	ENSMUST00000084238	Zdhhc18-001
OCR_15180	chr10	118502245	118502902	-1.2344	2.99922	53.5691	7.02e-10	5.47e-08	Treg_IK_StimVSTreg_IK_Unstim	ENSMUST00000148802	Cand1-004
OCR_97586	chr6	137762572	137762999	1.75063	1.95978	53.5556	7.04e-10	5.48e-08	Treg_IK_StimVSTreg_IK_Unstim	ENSMUST00000087675	Dera-201
OCR_39498	chr15	28119348	28120065	-1.02124	4.10941	53.4404	7.53e-10	5.81e-08	Treg_IK_StimVSTreg_IK_Unstim	ENSMUST00000067048	Dnahc5-001
OCR_49320	chr17	23753976	23754511	-1.21786	3.55458	53.1551	7.85e-10	6.03e-08	Treg_IK_StimVSTreg_IK_Unstim	ENSMUST00000133749	Zscan10-011
OCR_43115	chr15	98822896	98823276	-1.216	2.93227	53.1388	7.88e-10	6.04e-08	Treg_IK_StimVSTreg_IK_Unstim	ENSMUST00000142167	4930578M01Rik-201
OCR_32379	chr13	105856795	105858015	-1.07502	3.86031	53.0959	7.97e-10	6.1e-08	Treg_IK_StimVSTreg_IK_Unstim	ENSMUST00000063551	Rgs7bp-201
OCR_97872	chr6	142815856	142816796	-1.09605	4.58347	63.3367	8.13e-10	6.19e-08	Treg_IK_StimVSTreg_IK_Unstim	ENSMUST00000147058	St8sia1-002
OCR_51997	chr17	71334995	71335186	-1.20514	3.35033	53.7958	8.18e-10	6.22e-08	Treg_IK_StimVSTreg_IK_Unstim	ENSMUST00000131820	Myl12b-002
OCR_90224	chr5	139959114	139959412	-1.67446	2.23473	52.921	8.36e-10	6.35e-08	Treg_IK_StimVSTreg_IK_Unstim	ENSMUST00000143889	Zfand2a-004
OCR_6957	chr1	167639190	167639526	-1.17661	3.45826	52.827	8.65e-10	6.53e-08	Treg_IK_StimVSTreg_IK_Unstim	ENSMUST00000040357	Rcsd1-201
OCR_32128	chr13	102433900	102434664	-1.06264	4.15339	56.7253	8.67e-10	6.53e-08	Treg_IK_StimVSTreg_IK_Unstim	ENSMUST00000109325	Gm11016-201
OCR_17580	chr11	45900673	45901125	1.5708	2.45177	52.6916	8.9e-10	6.66e-08	Treg_IK_StimVSTreg_IK_Unstim	ENSMUST00000109251	Adam19-201
OCR_56617	chr18	75648669	75649380	-1.09491	3.65175	52.6229	9.06e-10	6.77e-08	Treg_IK_StimVSTreg_IK_Unstim	ENSMUST00000097524	Gm10532-201
OCR_58528	chr19	29335947	29336694	-1.01737	3.75818	52.4797	9.42e-10	7.01e-08	Treg_IK_StimVSTreg_IK_Unstim	ENSMUST00000025705	Jak2-201
OCR_112379	chr9	32317329	32317791	-1.07849	3.65671	52.4012	9.63e-10	7.13e-08	Treg_IK_StimVSTreg_IK_Unstim	ENSMUST00000016231	Fli1-201
OCR_97949	chr6	143373497	143374633	-1.04788	3.98116	52.1408	1.03e-09	7.58e-08	Treg_IK_StimVSTreg_IK_Unstim	ENSMUST00000104053	SNORA17.53-201
OCR_6709	chr1	163634548	163635715	-1.02964	4.0755	52.0212	1.07e-09	7.79e-08	Treg_IK_StimVSTreg_IK_Unstim	ENSMUST00000151268	Gm15429-001
OCR_109295	chr8	96710263	96710825	-1.10462	3.45316	51.9885	1.08e-09	7.85e-08	Treg_IK_StimVSTreg_IK_Unstim	ENSMUST00000062980	Mt1-202
OCR_9713	chr10	18721652	18721959	-1.33424	3.03807	52.1369	1.1e-09	8e-08	Treg_IK_StimVSTreg_IK_Unstim	ENSMUST00000154749	Tnfaip3-006
OCR_96006	chr6	114823897	114824273	-1.19266	3.07875	51.8887	1.11e-09	8.01e-08	Treg_IK_StimVSTreg_IK_Unstim	ENSMUST00000155620	Vgll4-005
OCR_117140	chrX	38753192	38754238	-1.09588	3.78034	51.8684	1.11e-09	8.05e-08	Treg_IK_StimVSTreg_IK_Unstim	ENSMUST00000128197	Gria3-005
OCR_90858	chr5	150327126	150327485	-1.01281	3.78379	51.8618	1.12e-09	8.05e-08	Treg_IK_StimVSTreg_IK_Unstim	ENSMUST00000110502	Wdr95-001
OCR_30777	chr13	75735490	75736379	1.22218	2.7811	51.8336	1.12e-09	8.1e-08	Treg_IK_StimVSTreg_IK_Unstim	ENSMUST00000099371	Gm4149-201
OCR_102157	chr7	91830113	91830562	-1.14112	3.36115	51.8037	1.13e-09	8.15e-08	Treg_IK_StimVSTreg_IK_Unstim	ENSMUST00000069537	Zfand6-201
OCR_91453	chr6	15676958	15677256	-1.14576	4.16476	60.5167	1.14e-09	8.17e-08	Treg_IK_StimVSTreg_IK_Unstim	ENSMUST00000128849	Mdfic-005
OCR_36980	chr14	79925934	79926426	-1.18636	3.32416	51.6478	1.18e-09	8.43e-08	Treg_IK_StimVSTreg_IK_Unstim	ENSMUST00000088767	Elf1-202
OCR_64126	chr2	83566096	83566482	-1.11122	3.47991	51.4145	1.26e-09	8.9e-08	Treg_IK_StimVSTreg_IK_Unstim	ENSMUST00000111740	Itgav-005
OCR_92062	chr6	31151147	31151957	-1.07891	3.39517	51.3976	1.27e-09	8.92e-08	Treg_IK_StimVSTreg_IK_Unstim	ENSMUST00000115107	AB041803-001
OCR_77799	chr4	32488407	32488780	-1.11917	3.41048	51.3932	1.27e-09	8.92e-08	Treg_IK_StimVSTreg_IK_Unstim	ENSMUST00000108179	Bach2-202
OCR_101925	chr7	87926861	87927687	-1.06167	3.72859	51.3418	1.29e-09	9.01e-08	Treg_IK_StimVSTreg_IK_Unstim	ENSMUST00000032751	Iqgap1-201
OCR_45091	chr16	30769103	30770088	-1.0328	4.78064	60.8596	1.31e-09	9.16e-08	Treg_IK_StimVSTreg_IK_Unstim	ENSMUST00000082820	U6.127-201
OCR_92014	chr6	30999867	31000518	-1.4373	2.82809	51.1891	1.34e-09	9.3e-08	Treg_IK_StimVSTreg_IK_Unstim	ENSMUST00000083676	Mir29a-201
OCR_29140	chr13	42172811	42173511	-1.07669	3.50993	50.9973	1.41e-09	9.73e-08	Treg_IK_StimVSTreg_IK_Unstim	ENSMUST00000060148	Hivep1-201
OCR_22448	chr12	17396902	17397763	-1.01156	3.57319	50.9683	1.43e-09	9.8e-08	Treg_IK_StimVSTreg_IK_Unstim	ENSMUST00000175296	Mir3066-201
OCR_56117	chr18	65955042	65955329	-1.05325	3.634	50.8997	1.45e-09	9.97e-08	Treg_IK_StimVSTreg_IK_Unstim	ENSMUST00000025394	Sec11c-001
OCR_9411	chr10	12853612	12854084	-1.7522	1.98169	50.8819	1.46e-09	9.99e-08	Treg_IK_StimVSTreg_IK_Unstim	ENSMUST00000068371	Plagl1-201
OCR_87424	chr5	92532062	92532465	-1.63895	2.4196	50.8616	1.47e-09	1e-07	Treg_IK_StimVSTreg_IK_Unstim	ENSMUST00000176870	AC122438.1-201
OCR_108648	chr8	86630584	86630860	-1.55316	2.26695	50.7676	1.51e-09	1.02e-07	Treg_IK_StimVSTreg_IK_Unstim	ENSMUST00000041367	Dcaf15-201
OCR_8044	chr1	185889845	185890358	-1.00918	4.19304	50.7632	1.51e-09	1.02e-07	Treg_IK_StimVSTreg_IK_Unstim	ENSMUST00000048655	Dusp10-001
OCR_116608	chr9	123744714	123745547	1.2654	3.60051	58.6609	1.54e-09	1.04e-07	Treg_IK_StimVSTreg_IK_Unstim	ENSMUST00000084715	Fyco1-201
OCR_110699	chr8	124376163	124376834	-1.15897	3.85986	50.9152	1.61e-09	1.09e-07	Treg_IK_StimVSTreg_IK_Unstim	ENSMUST00000104233	U6.507-201
OCR_110899	chr8	126783897	126784602	-1.03808	3.48341	50.5188	1.61e-09	1.09e-07	Treg_IK_StimVSTreg_IK_Unstim	ENSMUST00000142578	Galnt2-004
OCR_102589	chr7	105641134	105641760	-1.03068	3.84947	50.4667	1.64e-09	1.1e-07	Treg_IK_StimVSTreg_IK_Unstim	ENSMUST00000165205	Lrrc32-201
OCR_47856	chr16	92864460	92865045	-1.02818	3.45737	50.4377	1.65e-09	1.11e-07	Treg_IK_StimVSTreg_IK_Unstim	ENSMUST00000023673	Runx1-201
OCR_47076	chr16	76337665	76338018	-1.05669	3.56614	50.3647	1.68e-09	1.13e-07	Treg_IK_StimVSTreg_IK_Unstim	ENSMUST00000140483	Nrip1-006
OCR_75069	chr3	135294088	135294390	-1.28402	2.94524	50.3214	1.7e-09	1.14e-07	Treg_IK_StimVSTreg_IK_Unstim	ENSMUST00000129428	Nfkb1-003
OCR_57732	chr19	5843005	5843189	-1.55525	2.34343	50.1549	1.79e-09	1.19e-07	Treg_IK_StimVSTreg_IK_Unstim	ENSMUST00000173714	Neat1-004
OCR_92013	chr6	30999546	30999811	-2.0937	1.88208	50.0911	1.9e-09	1.25e-07	Treg_IK_StimVSTreg_IK_Unstim	ENSMUST00000083676	Mir29a-201
OCR_22485	chr12	17695802	17696005	-1.64953	2.05554	49.8356	1.95e-09	1.28e-07	Treg_IK_StimVSTreg_IK_Unstim	ENSMUST00000071858	Hpcal1-201
OCR_3199	chr1	84706423	84707322	-1.17004	3.28371	49.6738	2.04e-09	1.33e-07	Treg_IK_StimVSTreg_IK_Unstim	ENSMUST00000049126	Dner-201
OCR_60147	chr2	7191266	7192201	-1.08298	3.69734	49.6704	2.04e-09	1.33e-07	Treg_IK_StimVSTreg_IK_Unstim	ENSMUST00000104208	U6.505-201
OCR_56305	chr18	68851659	68852012	1.44703	3.3407	55.4964	2.27e-09	1.46e-07	Treg_IK_StimVSTreg_IK_Unstim	ENSMUST00000025428	4930546C10Rik-201
OCR_11387	chr10	53148443	53148940	-1.17146	2.92004	49.2571	2.29e-09	1.47e-07	Treg_IK_StimVSTreg_IK_Unstim	ENSMUST00000168554	Gm5423-201
OCR_26664	chr12	112420009	112420560	-1.07624	3.25797	49.2589	2.29e-09	1.47e-07	Treg_IK_StimVSTreg_IK_Unstim	ENSMUST00000121608	4930595D18Rik-001
OCR_110904	chr8	126798290	126798693	-1.27223	3.2563	49.2844	2.29e-09	1.47e-07	Treg_IK_StimVSTreg_IK_Unstim	ENSMUST00000142547	Galnt2-003
OCR_35025	chr14	37948915	37949146	-1.03172	3.60344	49.2196	2.32e-09	1.48e-07	Treg_IK_StimVSTreg_IK_Unstim	ENSMUST00000165649	Ghitm-202
OCR_63718	chr2	74907320	74907806	-1.18068	2.94816	49.1265	2.38e-09	1.52e-07	Treg_IK_StimVSTreg_IK_Unstim	ENSMUST00000143898	Gm13652-001
OCR_6594	chr1	161972454	161972889	-1.42591	3.02652	49.0885	2.4e-09	1.53e-07	Treg_IK_StimVSTreg_IK_Unstim	ENSMUST00000168250	4930523C07Rik-003
OCR_66386	chr2	132205274	132206146	-1.22617	3.12283	49.2674	2.41e-09	1.53e-07	Treg_IK_StimVSTreg_IK_Unstim	ENSMUST00000049997	Prokr2-001
OCR_87711	chr5	100930304	100930661	-1.12758	3.4389	49.3212	2.41e-09	1.53e-07	Treg_IK_StimVSTreg_IK_Unstim	ENSMUST00000094577	Lin54-201
OCR_2126	chr1	60969475	60969822	-1.20074	3.30873	50.4281	2.42e-09	1.53e-07	Treg_IK_StimVSTreg_IK_Unstim	ENSMUST00000144147	Ctla4-003
OCR_63176	chr2	65630059	65631148	-1.01768	3.75071	48.972	2.48e-09	1.57e-07	Treg_IK_StimVSTreg_IK_Unstim	ENSMUST00000112395	Csrnp3-201
OCR_9734	chr10	18844229	18844859	-1.2163	3.25003	48.991	2.57e-09	1.62e-07	Treg_IK_StimVSTreg_IK_Unstim	ENSMUST00000122863	Tnfaip3-004
OCR_9714	chr10	18722021	18722542	-1.09394	3.54702	48.8323	2.58e-09	1.62e-07	Treg_IK_StimVSTreg_IK_Unstim	ENSMUST00000154749	Tnfaip3-006
OCR_16238	chr11	6467847	6468513	-1.0786	3.52047	48.8212	2.59e-09	1.63e-07	Treg_IK_StimVSTreg_IK_Unstim	ENSMUST00000109721	Ccm2-201
OCR_100490	chr7	56045524	56045820	-1.22189	3.01133	48.7309	2.66e-09	1.65e-07	Treg_IK_StimVSTreg_IK_Unstim	ENSMUST00000139125	Zdhhc13-003
OCR_28251	chr13	22087938	22088304	-1.36641	2.46712	48.7117	2.67e-09	1.66e-07	Treg_IK_StimVSTreg_IK_Unstim	ENSMUST00000129665	Prss16-003
OCR_101412	chr7	80691396	80692014	-1.0587	3.67287	48.588	2.79e-09	1.72e-07	Treg_IK_StimVSTreg_IK_Unstim	ENSMUST00000169922	Chd2-001
OCR_84061	chr5	3503879	3504161	-1.38721	2.60288	48.5528	2.8e-09	1.72e-07	Treg_IK_StimVSTreg_IK_Unstim	ENSMUST00000168422	Gm17590-201
OCR_41004	chr15	64082287	64082705	-1.33109	3.21077	52.2582	2.83e-09	1.73e-07	Treg_IK_StimVSTreg_IK_Unstim	ENSMUST00000176358	Asap1-013
OCR_54431	chr18	33100427	33100868	-1.10323	3.65961	49.3128	2.84e-09	1.74e-07	Treg_IK_StimVSTreg_IK_Unstim	ENSMUST00000124871	2310026I22Rik-201
OCR_41099	chr15	66645094	66645345	-1.62219	2.09683	48.4633	2.87e-09	1.75e-07	Treg_IK_StimVSTreg_IK_Unstim	ENSMUST00000100572	Sla-201
OCR_106732	chr8	35874316	35874550	-1.15559	3.12601	48.4465	2.88e-09	1.76e-07	Treg_IK_StimVSTreg_IK_Unstim	ENSMUST00000033930	Dusp4-001
OCR_84766	chr5	22922060	22922332	-1.16758	3.13063	48.4304	2.89e-09	1.76e-07	Treg_IK_StimVSTreg_IK_Unstim	ENSMUST00000101522	5031425E22Rik-201
OCR_112356	chr9	31733324	31734146	-1.00722	3.8672	48.3569	2.95e-09	1.79e-07	Treg_IK_StimVSTreg_IK_Unstim	ENSMUST00000169182	Gm3756-201
OCR_49321	chr17	23757050	23757811	-1.03618	4.48711	51.3366	2.99e-09	1.81e-07	Treg_IK_StimVSTreg_IK_Unstim	ENSMUST00000133749	Zscan10-011
OCR_68260	chr2	163909439	163909680	-1.0724	3.26803	48.2882	3.01e-09	1.82e-07	Treg_IK_StimVSTreg_IK_Unstim	ENSMUST00000153319	Stk4-005
OCR_36872	chr14	78674731	78676540	-1.13325	3.40568	48.7662	3.06e-09	1.85e-07	Treg_IK_StimVSTreg_IK_Unstim	ENSMUST00000116752	AC126690.1-201
OCR_10015	chr10	22017597	22017837	-1.15737	3.31294	48.2439	3.13e-09	1.88e-07	Treg_IK_StimVSTreg_IK_Unstim	ENSMUST00000131558	H60b-001
OCR_76378	chr3	154479544	154480258	-1.11716	3.0711	48.0812	3.19e-09	1.91e-07	Treg_IK_StimVSTreg_IK_Unstim	ENSMUST00000098496	BC007180-001
OCR_56474	chr18	73802561	73803192	-1.3397	3.39824	53.8524	3.32e-09	1.99e-07	Treg_IK_StimVSTreg_IK_Unstim	ENSMUST00000131339	Smad4-004
OCR_89188	chr5	122843789	122844232	-1.40437	2.40703	47.8931	3.37e-09	2.01e-07	Treg_IK_StimVSTreg_IK_Unstim	ENSMUST00000031421	Arpc3-002
OCR_81815	chr4	124793433	124794147	-1.10552	3.23439	47.8737	3.39e-09	2.02e-07	Treg_IK_StimVSTreg_IK_Unstim	ENSMUST00000131685	Zc3h12a-002
OCR_6597	chr1	161976968	161977367	-1.10186	3.35213	47.7698	3.49e-09	2.07e-07	Treg_IK_StimVSTreg_IK_Unstim	ENSMUST00000168359	4930523C07Rik-201
OCR_26292	chr12	106693360	106693908	-1.50353	2.54325	48.6115	3.54e-09	2.09e-07	Treg_IK_StimVSTreg_IK_Unstim	ENSMUST00000001652	Bdkrb2-201
OCR_87706	chr5	100895475	100896223	-1.02245	3.6748	47.7219	3.54e-09	2.09e-07	Treg_IK_StimVSTreg_IK_Unstim	ENSMUST00000134439	Lin54-010
OCR_77898	chr4	33554560	33555004	-1.0371	3.28028	47.7023	3.56e-09	2.1e-07	Treg_IK_StimVSTreg_IK_Unstim	ENSMUST00000118608	Gm11935-001
OCR_44805	chr16	24538861	24539580	-1.04679	3.56316	47.6745	3.59e-09	2.11e-07	Treg_IK_StimVSTreg_IK_Unstim	ENSMUST00000078988	Lpp-202
OCR_68257	chr2	163903003	163903164	-1.5648	2.7005	51.2803	3.65e-09	2.14e-07	Treg_IK_StimVSTreg_IK_Unstim	ENSMUST00000018353	Stk4-001
OCR_116327	chr9	119677751	119678301	-1.46088	2.48303	47.542	3.72e-09	2.18e-07	Treg_IK_StimVSTreg_IK_Unstim	ENSMUST00000070617	Scn11a-201
OCR_99661	chr7	31305098	31306248	1.53964	2.51369	47.5102	3.76e-09	2.19e-07	Treg_IK_StimVSTreg_IK_Unstim	ENSMUST00000124276	Gm1082-001
OCR_54434	chr18	33104933	33105511	-1.09022	3.25791	47.484	3.79e-09	2.21e-07	Treg_IK_StimVSTreg_IK_Unstim	ENSMUST00000124871	2310026I22Rik-201
OCR_104664	chr7	142681387	142682127	-1.02373	3.40304	47.4336	3.84e-09	2.23e-07	Treg_IK_StimVSTreg_IK_Unstim	ENSMUST00000053716	Clrn3-201
OCR_45695	chr16	43696013	43696214	-1.21313	2.81091	47.3259	3.96e-09	2.29e-07	Treg_IK_StimVSTreg_IK_Unstim	ENSMUST00000096065	Tigit-201
OCR_68465	chr2	166497690	166498515	-1.08155	3.50146	47.251	4.05e-09	2.34e-07	Treg_IK_StimVSTreg_IK_Unstim	ENSMUST00000158520	7SK.268-201
OCR_55159	chr18	47157199	47157562	-1.66268	2.09871	47.2462	4.05e-09	2.34e-07	Treg_IK_StimVSTreg_IK_Unstim	ENSMUST00000157232	SNORA17.338-201
OCR_112422	chr9	32508652	32509033	-1.24497	2.94406	47.2131	4.09e-09	2.36e-07	Treg_IK_StimVSTreg_IK_Unstim	ENSMUST00000034534	Ets1-201
OCR_56583	chr18	75439606	75440037	-1.00599	4.21209	47.4073	4.12e-09	2.37e-07	Treg_IK_StimVSTreg_IK_Unstim	ENSMUST00000174338	Gm20544-001
OCR_106664	chr8	35227327	35227917	-1.10065	3.27499	47.0971	4.23e-09	2.43e-07	Treg_IK_StimVSTreg_IK_Unstim	ENSMUST00000033933	Tmem66-201
OCR_92562	chr6	41071176	41071472	-1.29051	2.90461	47.2617	4.27e-09	2.45e-07	Treg_IK_StimVSTreg_IK_Unstim	ENSMUST00000103270	Trbv13-2-201
OCR_74143	chr3	115409625	115410002	-1.22423	3.35045	47.2953	4.3e-09	2.46e-07	Treg_IK_StimVSTreg_IK_Unstim	ENSMUST00000170875	S1pr1-202
OCR_84868	chr5	24192603	24192919	-1.26914	2.72147	46.877	4.5e-09	2.54e-07	Treg_IK_StimVSTreg_IK_Unstim	ENSMUST00000068825	Nub1-201
OCR_92025	chr6	31030658	31031100	-1.00447	3.89371	47.6736	4.63e-09	2.61e-07	Treg_IK_StimVSTreg_IK_Unstim	ENSMUST00000123757	Gm13834-001
OCR_117577	chrX	84483624	84483830	1.4922	2.94133	49.3784	4.69e-09	2.64e-07	Treg_IK_StimVSTreg_IK_Unstim	ENSMUST00000118888	Gm8855-001
OCR_64726	chr2	101312743	101313545	-1.02229	3.85116	46.6627	4.79e-09	2.68e-07	Treg_IK_StimVSTreg_IK_Unstim	ENSMUST00000177431	RP23-325I3.4-001
OCR_4951	chr1	132892900	132893337	-1.03498	3.46443	46.5371	4.96e-09	2.77e-07	Treg_IK_StimVSTreg_IK_Unstim	ENSMUST00000016673	Il10-001
OCR_47848	chr16	92810748	92811518	-1.00936	3.56952	46.5037	5.01e-09	2.79e-07	Treg_IK_StimVSTreg_IK_Unstim	ENSMUST00000113957	Runx1-204
OCR_43228	chr15	100012146	100012773	-1.01811	3.77539	46.4505	5.09e-09	2.83e-07	Treg_IK_StimVSTreg_IK_Unstim	ENSMUST00000135658	Dip2b-003
OCR_25365	chr12	88234723	88235024	-1.22734	2.9068	46.3395	5.25e-09	2.91e-07	Treg_IK_StimVSTreg_IK_Unstim	ENSMUST00000171326	Gm17422-201
OCR_7826	chr1	182327916	182328214	-1.33305	2.87748	46.2573	5.38e-09	2.97e-07	Treg_IK_StimVSTreg_IK_Unstim	ENSMUST00000050581	Gm5069-201
OCR_14266	chr10	99043601	99044142	-1.12979	3.25044	46.1728	5.51e-09	3.04e-07	Treg_IK_StimVSTreg_IK_Unstim	ENSMUST00000167243	Gad1-ps-201
OCR_96034	chr6	115073205	115073767	-1.00387	3.49929	46.1077	5.62e-09	3.09e-07	Treg_IK_StimVSTreg_IK_Unstim	ENSMUST00000167775	Gm17733-201
OCR_68509	chr2	167160489	167161466	-1.10513	3.05751	46.0311	5.74e-09	3.14e-07	Treg_IK_StimVSTreg_IK_Unstim	ENSMUST00000109221	B4galt5-001
OCR_3126	chr1	82830149	82830482	-1.10902	3.23228	45.8933	5.98e-09	3.25e-07	Treg_IK_StimVSTreg_IK_Unstim	ENSMUST00000177110	AC138214.1-201
OCR_10757	chr10	39211808	39212317	-1.09078	3.08899	45.7866	6.16e-09	3.33e-07	Treg_IK_StimVSTreg_IK_Unstim	ENSMUST00000136659	Fyn-008
OCR_83090	chr4	142803427	142803878	-1.12047	3.04048	45.6823	6.35e-09	3.43e-07	Treg_IK_StimVSTreg_IK_Unstim	ENSMUST00000156909	Prdm2-004
OCR_77803	chr4	32510713	32510997	-1.24357	2.8233	45.6654	6.39e-09	3.44e-07	Treg_IK_StimVSTreg_IK_Unstim	ENSMUST00000108179	Bach2-202
OCR_3419	chr1	90115702	90116077	1.15552	3.29166	45.658	6.4e-09	3.45e-07	Treg_IK_StimVSTreg_IK_Unstim	ENSMUST00000173165	Gm20528-001
OCR_31463	chr13	91177551	91178082	1.02429	3.71992	46.8103	6.53e-09	3.51e-07	Treg_IK_StimVSTreg_IK_Unstim	ENSMUST00000166424	Rps23-202
OCR_84768	chr5	22924752	22924965	-1.11311	3.17227	45.5267	6.65e-09	3.56e-07	Treg_IK_StimVSTreg_IK_Unstim	ENSMUST00000101522	5031425E22Rik-201
OCR_115522	chr9	103610730	103611547	-1.00437	3.76655	45.5191	6.66e-09	3.57e-07	Treg_IK_StimVSTreg_IK_Unstim	ENSMUST00000049452	Tmem108-201
OCR_39919	chr15	36724618	36724836	-1.06061	3.27305	45.4933	6.71e-09	3.59e-07	Treg_IK_StimVSTreg_IK_Unstim	ENSMUST00000110359	Ywhaz-004
OCR_53457	chr18	5648612	5649180	-1.62837	2.04183	45.2949	7.11e-09	3.78e-07	Treg_IK_StimVSTreg_IK_Unstim	ENSMUST00000116893	AC127028.1-201
OCR_78812	chr4	55539037	55539639	-1.29533	2.62471	45.2405	7.22e-09	3.82e-07	Treg_IK_StimVSTreg_IK_Unstim	ENSMUST00000129250	Klf4-003
OCR_96057	chr6	115527975	115528449	-1.07733	3.13644	45.1241	7.47e-09	3.93e-07	Treg_IK_StimVSTreg_IK_Unstim	ENSMUST00000143520	Tsen2-005
OCR_71344	chr3	52144127	52144920	-1.06109	3.10299	45.0406	7.66e-09	4.02e-07	Treg_IK_StimVSTreg_IK_Unstim	ENSMUST00000174738	Gm20402-001
OCR_56883	chr18	80395155	80395584	-1.23982	2.85915	44.9638	7.83e-09	4.09e-07	Treg_IK_StimVSTreg_IK_Unstim	ENSMUST00000025462	Rbfa-201
OCR_29109	chr13	41733456	41733903	-1.29764	2.47499	44.7325	8.38e-09	4.32e-07	Treg_IK_StimVSTreg_IK_Unstim	ENSMUST00000067176	Gm5082-201
OCR_77805	chr4	32512052	32512471	-1.02079	3.26218	44.7316	8.38e-09	4.32e-07	Treg_IK_StimVSTreg_IK_Unstim	ENSMUST00000108179	Bach2-202
OCR_92046	chr6	31096798	31097761	-1.09386	3.17549	44.5163	8.93e-09	4.56e-07	Treg_IK_StimVSTreg_IK_Unstim	ENSMUST00000118459	Gm13835-001
OCR_52834	chr17	84713461	84714074	-1.25834	3.05677	44.4952	8.98e-09	4.57e-07	Treg_IK_StimVSTreg_IK_Unstim	ENSMUST00000083798	U6.363-201
OCR_12434	chr10	74388068	74388573	-1.06012	3.22959	44.471	9.05e-09	4.59e-07	Treg_IK_StimVSTreg_IK_Unstim	ENSMUST00000037813	Gnaz-001
OCR_111784	chr9	15338621	15338923	-1.11202	2.95953	44.4652	9.06e-09	4.59e-07	Treg_IK_StimVSTreg_IK_Unstim	ENSMUST00000045620	BC017612-201
OCR_72925	chr3	89674721	89675298	-1.0549	3.89781	46.1037	9.45e-09	4.77e-07	Treg_IK_StimVSTreg_IK_Unstim	ENSMUST00000107401	She-201
OCR_22470	chr12	17556316	17556513	-1.06772	3.33944	44.2321	1.03e-08	5.13e-07	Treg_IK_StimVSTreg_IK_Unstim	ENSMUST00000082493	SNORA42.1-201
OCR_21832	chr12	3359255	3359777	-1.04794	3.36985	44.018	1.03e-08	5.15e-07	Treg_IK_StimVSTreg_IK_Unstim	ENSMUST00000171149	Gm17681-201
OCR_29533	chr13	49367651	49368075	-1.20929	2.92034	43.9477	1.06e-08	5.23e-07	Treg_IK_StimVSTreg_IK_Unstim	ENSMUST00000021816	Susd3-002
OCR_25640	chr12	93884902	93885602	-1.09842	3.06961	43.8688	1.08e-08	5.34e-07	Treg_IK_StimVSTreg_IK_Unstim	ENSMUST00000077660	Gm2228-201
OCR_314	chr1	13378604	13379302	-1.05263	3.49072	44.1427	1.09e-08	5.39e-07	Treg_IK_StimVSTreg_IK_Unstim	ENSMUST00000068304	Ncoa2-201
OCR_63327	chr2	68770072	68770930	-1.06589	3.72661	43.7162	1.13e-08	5.55e-07	Treg_IK_StimVSTreg_IK_Unstim	ENSMUST00000155748	Lass6-004
OCR_66144	chr2	128191371	128191878	-1.06905	3.37915	43.7069	1.13e-08	5.55e-07	Treg_IK_StimVSTreg_IK_Unstim	ENSMUST00000131961	Gm14010-001
OCR_113840	chr9	64627410	64628265	-1.0283	3.34904	43.6712	1.15e-08	5.59e-07	Treg_IK_StimVSTreg_IK_Unstim	ENSMUST00000171136	Dennd4a-203
OCR_58711	chr19	33339478	33340100	-1.24218	2.87579	43.6359	1.16e-08	5.63e-07	Treg_IK_StimVSTreg_IK_Unstim	ENSMUST00000096114	Rnls-001
OCR_110819	chr8	125549823	125550288	-1.19686	3.02254	43.5952	1.17e-08	5.69e-07	Treg_IK_StimVSTreg_IK_Unstim	ENSMUST00000176068	AC121819.1-201
OCR_5019	chr1	133451578	133452267	-1.0182	3.74393	43.6642	1.19e-08	5.76e-07	Treg_IK_StimVSTreg_IK_Unstim	ENSMUST00000068613	Fam72a-001
OCR_11256	chr10	50617796	50618334	-1.02244	3.37136	43.3706	1.25e-08	6e-07	Treg_IK_StimVSTreg_IK_Unstim	ENSMUST00000020071	Sim1-201
OCR_105804	chr8	13630643	13631248	-1.14841	3.02854	43.3118	1.27e-08	6.09e-07	Treg_IK_StimVSTreg_IK_Unstim	ENSMUST00000132637	Rasa3-004
OCR_57113	chr18	83079868	83080141	-1.03891	3.2365	43.2914	1.28e-08	6.12e-07	Treg_IK_StimVSTreg_IK_Unstim	ENSMUST00000171238	Zfp516-202
OCR_106309	chr8	26208445	26208719	-1.00821	3.31954	43.272	1.29e-08	6.14e-07	Treg_IK_StimVSTreg_IK_Unstim	ENSMUST00000098866	Plekha2-003
OCR_92968	chr6	50322998	50323523	-1.25638	2.7869	43.266	1.29e-08	6.14e-07	Treg_IK_StimVSTreg_IK_Unstim	ENSMUST00000090019	Osbpl3-007
OCR_46247	chr16	52142908	52143714	-1.041	5.33423	59.7942	1.31e-08	6.22e-07	Treg_IK_StimVSTreg_IK_Unstim	ENSMUST00000171372	Cblb-203
OCR_55547	chr18	56665039	56665501	-1.26224	2.72903	43.177	1.33e-08	6.27e-07	Treg_IK_StimVSTreg_IK_Unstim	ENSMUST00000172902	Aldh7a1-009
OCR_24628	chr12	74771546	74772244	-1.13219	3.13024	43.1455	1.34e-08	6.31e-07	Treg_IK_StimVSTreg_IK_Unstim	ENSMUST00000119092	Prkch-002
OCR_76941	chr4	8011892	8012581	-1.0051	3.57152	43.1336	1.34e-08	6.33e-07	Treg_IK_StimVSTreg_IK_Unstim	ENSMUST00000120050	Gm11800-001
OCR_107000	chr8	42330538	42331149	1.05232	3.07975	43.1006	1.36e-08	6.37e-07	Treg_IK_StimVSTreg_IK_Unstim	ENSMUST00000045199	Pcm1-201
OCR_58314	chr19	21348719	21348972	-1.01261	3.45858	43.0392	1.38e-08	6.48e-07	Treg_IK_StimVSTreg_IK_Unstim	ENSMUST00000152338	Zfand5-004
OCR_1922	chr1	58357728	58358384	-1.16404	3.16278	42.9804	1.41e-08	6.57e-07	Treg_IK_StimVSTreg_IK_Unstim	ENSMUST00000161126	Gm15759-001
OCR_58262	chr19	18674080	18674682	-1.10516	3.30319	44.487	1.41e-08	6.58e-07	Treg_IK_StimVSTreg_IK_Unstim	ENSMUST00000117398	Gm8250-001
OCR_110878	chr8	126330887	126331338	-1.18366	2.63121	42.9135	1.43e-08	6.67e-07	Treg_IK_StimVSTreg_IK_Unstim	ENSMUST00000117702	Rab4a-002
OCR_47703	chr16	91063907	91064400	-1.00602	3.30334	42.7903	1.49e-08	6.87e-07	Treg_IK_StimVSTreg_IK_Unstim	ENSMUST00000035689	4932438H23Rik-001
OCR_92533	chr6	40382951	40383494	-1.0743	3.30492	42.7698	1.5e-08	6.89e-07	Treg_IK_StimVSTreg_IK_Unstim	ENSMUST00000039008	E330009J07Rik-002
OCR_20961	chr11	109132664	109133235	-1.08013	3.21299	42.7287	1.52e-08	6.96e-07	Treg_IK_StimVSTreg_IK_Unstim	ENSMUST00000103062	Rgs9-004
OCR_88349	chr5	110712842	110713270	-1.17714	3.09328	43.0154	1.52e-08	6.98e-07	Treg_IK_StimVSTreg_IK_Unstim	ENSMUST00000141550	Pxmp2-004
OCR_3417	chr1	90109675	90111537	1.0066	5.1181	53.6836	1.52e-08	6.98e-07	Treg_IK_StimVSTreg_IK_Unstim	ENSMUST00000073049	Ugt1a1-001
OCR_59905	chr2	3681403	3681836	-1.0286	3.1141	42.7114	1.52e-08	6.98e-07	Treg_IK_StimVSTreg_IK_Unstim	ENSMUST00000177037	Fam107b-006
OCR_84478	chr5	15881937	15882724	-1.33641	2.4893	42.6533	1.55e-08	7.08e-07	Treg_IK_StimVSTreg_IK_Unstim	ENSMUST00000030683	Hgf-201
OCR_45428	chr16	35984571	35984884	-1.14291	2.8407	42.558	1.6e-08	7.24e-07	Treg_IK_StimVSTreg_IK_Unstim	ENSMUST00000173555	Kpna1-005
OCR_8047	chr1	185899494	185900175	-1.41536	2.69428	42.6045	1.63e-08	7.36e-07	Treg_IK_StimVSTreg_IK_Unstim	ENSMUST00000048655	Dusp10-001
OCR_29580	chr13	51072841	51073581	1.58362	2.08346	42.4439	1.65e-08	7.45e-07	Treg_IK_StimVSTreg_IK_Unstim	ENSMUST00000122660	Y_RNA.14-201
OCR_45501	chr16	37869816	37870057	-1.34388	2.49438	42.3901	1.68e-08	7.55e-07	Treg_IK_StimVSTreg_IK_Unstim	ENSMUST00000171099	Lrrc58-201
OCR_21540	chr11	118077172	118077826	-1.02212	3.49039	42.2612	1.74e-08	7.81e-07	Treg_IK_StimVSTreg_IK_Unstim	ENSMUST00000131115	Cyth1-004
OCR_1236	chr1	39978942	39979191	-1.41883	2.27739	42.2316	1.76e-08	7.87e-07	Treg_IK_StimVSTreg_IK_Unstim	ENSMUST00000027244	Map4k4-201
OCR_2730	chr1	74397589	74398368	-1.0031	3.25413	42.1791	1.79e-08	7.96e-07	Treg_IK_StimVSTreg_IK_Unstim	ENSMUST00000097697	Gm216-001
OCR_66375	chr2	132087984	132088276	-1.06057	3.18007	42.181	1.79e-08	7.96e-07	Treg_IK_StimVSTreg_IK_Unstim	ENSMUST00000110158	Cds2-003
OCR_3455	chr1	90204602	90204966	1.38518	2.72866	42.1452	1.81e-08	8.03e-07	Treg_IK_StimVSTreg_IK_Unstim	ENSMUST00000040210	Trpm8-002
OCR_63755	chr2	75526983	75527492	-1.01053	3.29636	42.1268	1.82e-08	8.06e-07	Treg_IK_StimVSTreg_IK_Unstim	ENSMUST00000158390	U6.830-201
OCR_61933	chr2	38224063	38224678	-1.0489	3.11392	42.1208	1.82e-08	8.07e-07	Treg_IK_StimVSTreg_IK_Unstim	ENSMUST00000137134	Gm13584-001
OCR_106303	chr8	26179296	26179466	-1.14107	2.74666	42.1039	1.83e-08	8.09e-07	Treg_IK_StimVSTreg_IK_Unstim	ENSMUST00000125466	Plekha2-004
OCR_93011	chr6	51120854	51121270	-1.38058	2.51482	42.0441	1.86e-08	8.22e-07	Treg_IK_StimVSTreg_IK_Unstim	ENSMUST00000083571	Mir148a-201
OCR_21927	chr12	4690403	4691185	1.14898	3.12246	41.9908	1.89e-08	8.34e-07	Treg_IK_StimVSTreg_IK_Unstim	ENSMUST00000080062	Gm17541-201
OCR_58022	chr19	10890204	10890769	-1.0198	3.22941	41.973	1.9e-08	8.37e-07	Treg_IK_StimVSTreg_IK_Unstim	ENSMUST00000174176	Cd6-006
OCR_92015	chr6	31000725	31001224	-1.26727	2.72589	41.8905	1.95e-08	8.56e-07	Treg_IK_StimVSTreg_IK_Unstim	ENSMUST00000083676	Mir29a-201
OCR_7750	chr1	181500621	181501078	1.3505	2.32622	41.8495	1.97e-08	8.64e-07	Treg_IK_StimVSTreg_IK_Unstim	ENSMUST00000143270	Cnst-004
OCR_92008	chr6	30754734	30755728	1.12893	3.59939	42.8086	2.02e-08	8.8e-07	Treg_IK_StimVSTreg_IK_Unstim	ENSMUST00000149496	Mest-011
OCR_84605	chr5	19592747	19593634	-1.11194	3.15899	41.7571	2.03e-08	8.82e-07	Treg_IK_StimVSTreg_IK_Unstim	ENSMUST00000082570	U6.42-201
OCR_20805	chr11	106509538	106510364	-1.02844	3.45165	41.7487	2.03e-08	8.83e-07	Treg_IK_StimVSTreg_IK_Unstim	ENSMUST00000128933	Tex2-003
OCR_9222	chr10	8693368	8694167	-1.02011	3.44655	41.585	2.14e-08	9.2e-07	Treg_IK_StimVSTreg_IK_Unstim	ENSMUST00000015449	Sash1-201
OCR_42105	chr15	81530692	81531451	1.31819	2.42106	41.5703	2.15e-08	9.22e-07	Treg_IK_StimVSTreg_IK_Unstim	ENSMUST00000072910	Chadl-001
OCR_84890	chr5	24415053	24415467	-1.08776	3.22907	41.5332	2.23e-08	9.51e-07	Treg_IK_StimVSTreg_IK_Unstim	ENSMUST00000123749	Prkag2-006
OCR_32324	chr13	105238315	105238766	1.32887	2.4405	41.6946	2.25e-08	9.6e-07	Treg_IK_StimVSTreg_IK_Unstim	ENSMUST00000043424	Adamts6-201
OCR_88100	chr5	106228401	106228920	-1.12796	2.7928	41.3693	2.28e-08	9.72e-07	Treg_IK_StimVSTreg_IK_Unstim	ENSMUST00000132586	Rps15a-ps5-001
OCR_68262	chr2	163913187	163913477	-1.29083	2.52813	41.2545	2.36e-08	1e-06	Treg_IK_StimVSTreg_IK_Unstim	ENSMUST00000153319	Stk4-005
OCR_47081	chr16	76354520	76354949	-1.01614	3.85648	43.2371	2.44e-08	1.03e-06	Treg_IK_StimVSTreg_IK_Unstim	ENSMUST00000141182	Nrip1-005
OCR_92026	chr6	31031370	31031594	-1.28777	2.51903	41.0574	2.51e-08	1.05e-06	Treg_IK_StimVSTreg_IK_Unstim	ENSMUST00000123757	Gm13834-001
OCR_76341	chr3	154235044	154235277	-1.74446	1.78842	41.0331	2.53e-08	1.06e-06	Treg_IK_StimVSTreg_IK_Unstim	ENSMUST00000148680	Tyw3-003
OCR_36523	chr14	71164923	71165248	-1.13799	2.9612	40.978	2.57e-08	1.08e-06	Treg_IK_StimVSTreg_IK_Unstim	ENSMUST00000171481	Dok2-007
OCR_97715	chr6	140576903	140577181	-1.20571	2.68481	40.8503	2.67e-08	1.11e-06	Treg_IK_StimVSTreg_IK_Unstim	ENSMUST00000161335	Aebp2-005
OCR_26797	chr12	114094617	114094827	-1.00023	3.37364	40.8213	2.7e-08	1.12e-06	Treg_IK_StimVSTreg_IK_Unstim	ENSMUST00000021729	Gpr132-201
OCR_25920	chr12	100880865	100881234	1.39097	2.12462	40.7872	2.72e-08	1.13e-06	Treg_IK_StimVSTreg_IK_Unstim	ENSMUST00000137842	Gm16956-201
OCR_2984	chr1	79762394	79762612	1.3582	2.42656	40.718	2.78e-08	1.14e-06	Treg_IK_StimVSTreg_IK_Unstim	ENSMUST00000125641	Wdfy1-004
OCR_3422	chr1	90124706	90125321	1.05644	3.75105	41.3633	2.8e-08	1.15e-06	Treg_IK_StimVSTreg_IK_Unstim	ENSMUST00000113130	Heatr7b1-001
OCR_75084	chr3	135338420	135338847	-1.04028	3.4711	40.7942	2.83e-08	1.16e-06	Treg_IK_StimVSTreg_IK_Unstim	ENSMUST00000164430	Nfkb1-203
OCR_86878	chr5	74932301	74932538	-1.18908	2.64103	40.6405	2.85e-08	1.16e-06	Treg_IK_StimVSTreg_IK_Unstim	ENSMUST00000121950	Fip1l1-008
OCR_26934	chr12	115853811	115854556	-1.17015	3.37586	41.5592	2.9e-08	1.18e-06	Treg_IK_StimVSTreg_IK_Unstim	ENSMUST00000103500	Ighv1-12-201
OCR_18383	chr11	60955025	60955542	-1.24224	2.46682	40.5217	2.95e-08	1.2e-06	Treg_IK_StimVSTreg_IK_Unstim	ENSMUST00000137832	Tnfrsf13b-004
OCR_60309	chr2	11081177	11081762	1.12868	2.90766	40.5224	2.95e-08	1.2e-06	Treg_IK_StimVSTreg_IK_Unstim	ENSMUST00000114853	Prkcq-003
OCR_118452	chrX	159987494	159988483	-1.08264	3.07626	40.5194	2.96e-08	1.2e-06	Treg_IK_StimVSTreg_IK_Unstim	ENSMUST00000033730	Grpr-001
OCR_47751	chr16	91551483	91551836	-1.03118	3.21227	40.2238	3.24e-08	1.3e-06	Treg_IK_StimVSTreg_IK_Unstim	ENSMUST00000127644	Ifngr2-003
OCR_79423	chr4	70038973	70039535	1.08762	3.26805	40.1261	3.33e-08	1.33e-06	Treg_IK_StimVSTreg_IK_Unstim	ENSMUST00000126416	Cdk5rap2-005
OCR_64727	chr2	101313588	101313813	-1.99386	1.40393	40.1184	3.34e-08	1.33e-06	Treg_IK_StimVSTreg_IK_Unstim	ENSMUST00000177431	RP23-325I3.4-001
OCR_43214	chr15	99920051	99920705	-1.03765	2.97216	40.1043	3.36e-08	1.34e-06	Treg_IK_StimVSTreg_IK_Unstim	ENSMUST00000100203	Dip2b-001
OCR_22511	chr12	17880238	17881138	-1.02379	2.9912	40.08	3.38e-08	1.35e-06	Treg_IK_StimVSTreg_IK_Unstim	ENSMUST00000169996	Gm9222-201
OCR_59886	chr2	3632753	3632998	-1.00756	3.23798	40.0436	3.42e-08	1.36e-06	Treg_IK_StimVSTreg_IK_Unstim	ENSMUST00000115053	Fam107b-004
OCR_116477	chr9	121650093	121650675	-1.16581	2.57707	40.0151	3.45e-08	1.37e-06	Treg_IK_StimVSTreg_IK_Unstim	ENSMUST00000164646	E530011L22Rik-201
OCR_60750	chr2	18879041	18879421	-1.02432	3.38378	40.003	3.46e-08	1.37e-06	Treg_IK_StimVSTreg_IK_Unstim	ENSMUST00000006912	Pip4k2a-001
OCR_76862	chr4	6887058	6887479	-1.08623	2.89375	39.9895	3.48e-08	1.38e-06	Treg_IK_StimVSTreg_IK_Unstim	ENSMUST00000150082	Tox-004
OCR_96746	chr6	125188427	125188860	1.25647	2.6339	39.9179	3.55e-08	1.4e-06	Treg_IK_StimVSTreg_IK_Unstim	ENSMUST00000032486	Cd27-001
OCR_94079	chr6	72907105	72907345	-1.01616	3.20358	39.9031	3.57e-08	1.41e-06	Treg_IK_StimVSTreg_IK_Unstim	ENSMUST00000114049	Tmsb10-002
OCR_13552	chr10	90191076	90192027	-1.16906	3.93509	46.5358	3.63e-08	1.43e-06	Treg_IK_StimVSTreg_IK_Unstim	ENSMUST00000099364	Anks1b-203
OCR_20784	chr11	106277269	106278360	-1.01053	3.37563	39.8217	3.8e-08	1.49e-06	Treg_IK_StimVSTreg_IK_Unstim	ENSMUST00000141146	Icam2-003
OCR_3418	chr1	90114653	90114879	1.35165	2.6726	39.566	3.96e-08	1.54e-06	Treg_IK_StimVSTreg_IK_Unstim	ENSMUST00000174821	Gm20528-002
OCR_1042	chr1	36779344	36780589	-1.09283	4.28573	47.6354	3.97e-08	1.54e-06	Treg_IK_StimVSTreg_IK_Unstim	ENSMUST00000160084	Actr1b-007
OCR_19650	chr11	87275705	87276666	-1.02115	3.38359	39.5383	4e-08	1.55e-06	Treg_IK_StimVSTreg_IK_Unstim	ENSMUST00000093680	U3.8-201
OCR_112434	chr9	32534105	32534601	-1.02022	3.71129	41.167	4e-08	1.55e-06	Treg_IK_StimVSTreg_IK_Unstim	ENSMUST00000034534	Ets1-201
OCR_10076	chr10	24012410	24012942	-1.24791	2.75745	39.5149	4.02e-08	1.55e-06	Treg_IK_StimVSTreg_IK_Unstim	ENSMUST00000154916	Moxd1-002
OCR_106735	chr8	35884314	35884908	-1.02566	3.14222	39.4863	4.06e-08	1.57e-06	Treg_IK_StimVSTreg_IK_Unstim	ENSMUST00000033930	Dusp4-001
OCR_118450	chrX	159413957	159414676	-1.32973	2.76536	42.047	4.09e-08	1.58e-06	Treg_IK_StimVSTreg_IK_Unstim	ENSMUST00000112300	Ctps2-013
OCR_16847	chr11	21469552	21469728	-1.15007	3.00814	39.4299	4.34e-08	1.65e-06	Treg_IK_StimVSTreg_IK_Unstim	ENSMUST00000102874	Mdh1-001
OCR_1931	chr1	58472685	58473282	-1.3275	3.03509	43.2079	4.62e-08	1.74e-06	Treg_IK_StimVSTreg_IK_Unstim	ENSMUST00000123580	Clk1-006
OCR_64359	chr2	90387165	90387837	-1.06791	2.92565	39.0275	4.68e-08	1.75e-06	Treg_IK_StimVSTreg_IK_Unstim	ENSMUST00000026352	Ptprj-201
OCR_118593	chrX	164035549	164036286	-1.20981	2.48267	38.99	4.73e-08	1.77e-06	Treg_IK_StimVSTreg_IK_Unstim	ENSMUST00000058979	Frmpd4-201
OCR_51670	chr17	65910608	65911268	-1.18452	2.69115	38.8985	4.87e-08	1.81e-06	Treg_IK_StimVSTreg_IK_Unstim	ENSMUST00000086722	Tmem232-202
OCR_21487	chr11	117689941	117690179	-1.28558	2.50799	38.7476	5.11e-08	1.88e-06	Treg_IK_StimVSTreg_IK_Unstim	ENSMUST00000026661	Tk1-001
OCR_27008	chr12	116902181	116902692	-1.46357	2.12067	38.5362	5.45e-08	1.99e-06	Treg_IK_StimVSTreg_IK_Unstim	ENSMUST00000103540	Ighv8-12-201
OCR_77800	chr4	32492011	32492401	-1.05723	4.13892	46.7027	5.47e-08	2e-06	Treg_IK_StimVSTreg_IK_Unstim	ENSMUST00000108179	Bach2-202
OCR_24394	chr12	71335432	71335690	-1.18086	2.55185	38.4608	5.58e-08	2.03e-06	Treg_IK_StimVSTreg_IK_Unstim	ENSMUST00000161083	Pygl-002
OCR_89941	chr5	135670531	135671169	1.76162	1.99642	42.4996	5.62e-08	2.05e-06	Treg_IK_StimVSTreg_IK_Unstim	ENSMUST00000002825	Baz1b-001
OCR_118402	chrX	156247380	156247872	-1.04686	3.20628	38.4347	5.63e-08	2.05e-06	Treg_IK_StimVSTreg_IK_Unstim	ENSMUST00000112451	Sh3kbp1-007
OCR_50609	chr17	44850985	44851440	-1.07338	2.77619	38.407	5.68e-08	2.06e-06	Treg_IK_StimVSTreg_IK_Unstim	ENSMUST00000161664	9530072K05Rik-001
OCR_23490	chr12	40931843	40932377	-1.42851	2.45972	39.0844	5.98e-08	2.15e-06	Treg_IK_StimVSTreg_IK_Unstim	ENSMUST00000170119	Ifrd1-009
OCR_63014	chr2	61550722	61551011	-1.12482	2.88902	38.2354	5.99e-08	2.15e-06	Treg_IK_StimVSTreg_IK_Unstim	ENSMUST00000153683	Psmd14-003
OCR_10865	chr10	40408081	40408647	-1.11625	2.88655	38.2953	6.11e-08	2.19e-06	Treg_IK_StimVSTreg_IK_Unstim	ENSMUST00000058747	9030224M15Rik-001
OCR_66217	chr2	129855266	129856015	-1.00389	3.06848	38.1516	6.15e-08	2.19e-06	Treg_IK_StimVSTreg_IK_Unstim	ENSMUST00000028886	Tgm3-201
OCR_98040	chr6	144218106	144218634	-1.04065	3.30014	38.6944	6.24e-08	2.22e-06	Treg_IK_StimVSTreg_IK_Unstim	ENSMUST00000150087	Sox5-011
OCR_116338	chr9	119877682	119877889	-1.60249	1.68627	38.0278	6.39e-08	2.26e-06	Treg_IK_StimVSTreg_IK_Unstim	ENSMUST00000161967	Ttc21a-004
OCR_58017	chr19	10875343	10876032	-1.05307	2.98655	37.9651	6.52e-08	2.3e-06	Treg_IK_StimVSTreg_IK_Unstim	ENSMUST00000025572	Cd6-005
OCR_82043	chr4	128933609	128934651	-1.0345	3.06348	37.9322	6.59e-08	2.31e-06	Treg_IK_StimVSTreg_IK_Unstim	ENSMUST00000145261	C77080-004
OCR_89152	chr5	122613150	122613650	-1.02951	2.89494	37.9217	6.61e-08	2.32e-06	Treg_IK_StimVSTreg_IK_Unstim	ENSMUST00000143218	Ppp1cc-003
OCR_99178	chr7	25154072	25154296	-1.215	2.75001	37.8944	6.67e-08	2.34e-06	Treg_IK_StimVSTreg_IK_Unstim	ENSMUST00000067352	Kcnn4-201
OCR_24603	chr12	74710330	74710661	-1.14662	2.85978	37.8811	6.7e-08	2.34e-06	Treg_IK_StimVSTreg_IK_Unstim	ENSMUST00000119092	Prkch-002
OCR_31876	chr13	97960428	97960643	1.26237	2.8934	37.88	6.7e-08	2.34e-06	Treg_IK_StimVSTreg_IK_Unstim	ENSMUST00000022169	Hexb-201
OCR_31005	chr13	81797737	81798030	-1.07064	3.01821	37.8182	6.83e-08	2.38e-06	Treg_IK_StimVSTreg_IK_Unstim	ENSMUST00000049055	Lysmd3-201
OCR_13574	chr10	90585527	90585706	-1.34261	2.28613	37.7904	6.89e-08	2.4e-06	Treg_IK_StimVSTreg_IK_Unstim	ENSMUST00000171960	Slc25a3-006
OCR_87004	chr5	77524633	77524873	-1.04008	3.10371	37.8058	7.12e-08	2.47e-06	Treg_IK_StimVSTreg_IK_Unstim	ENSMUST00000113453	Hopx-002
OCR_109642	chr8	108162474	108162743	-1.45045	2.13873	37.6285	7.25e-08	2.5e-06	Treg_IK_StimVSTreg_IK_Unstim	ENSMUST00000129388	Ctcf-004
OCR_56576	chr18	75406497	75407078	-1.03284	2.94136	37.5599	7.41e-08	2.55e-06	Treg_IK_StimVSTreg_IK_Unstim	ENSMUST00000174338	Gm20544-001
OCR_79105	chr4	59941248	59941631	-1.13355	2.86275	37.5342	7.47e-08	2.56e-06	Treg_IK_StimVSTreg_IK_Unstim	ENSMUST00000030081	Slc46a2-001
OCR_10167	chr10	25340822	25342074	-1.09201	3.03396	37.4287	7.72e-08	2.64e-06	Treg_IK_StimVSTreg_IK_Unstim	ENSMUST00000061084	Epb4.1l2-204
OCR_8845	chr1	196804314	196804488	-1.14954	2.54816	37.3623	7.89e-08	2.68e-06	Treg_IK_StimVSTreg_IK_Unstim	ENSMUST00000133646	Gm16897-201
OCR_65863	chr2	122507030	122508159	1.14288	2.88828	37.3436	7.93e-08	2.69e-06	Treg_IK_StimVSTreg_IK_Unstim	ENSMUST00000142323	4930417H01Rik-004
OCR_74722	chr3	129360071	129360413	-1.37982	2.11405	37.3208	7.99e-08	2.71e-06	Treg_IK_StimVSTreg_IK_Unstim	ENSMUST00000174960	AC098732.1-201
OCR_67957	chr2	158533797	158534292	-1.15681	2.70136	37.3128	8.01e-08	2.71e-06	Treg_IK_StimVSTreg_IK_Unstim	ENSMUST00000145073	Ppp1r16b-004
OCR_73704	chr3	104023003	104023232	-1.05414	2.91462	37.1448	8.45e-08	2.84e-06	Treg_IK_StimVSTreg_IK_Unstim	ENSMUST00000121198	Magi3-002
OCR_118088	chrX	132136036	132136748	-1.16597	2.90493	37.1279	8.49e-08	2.86e-06	Treg_IK_StimVSTreg_IK_Unstim	ENSMUST00000113163	Nxf7-001
OCR_58529	chr19	29344706	29345153	-1.17605	2.65862	36.9611	8.95e-08	2.99e-06	Treg_IK_StimVSTreg_IK_Unstim	ENSMUST00000025705	Jak2-201
OCR_2256	chr1	63032915	63033300	-1.49899	2.01147	36.9565	8.97e-08	2.99e-06	Treg_IK_StimVSTreg_IK_Unstim	ENSMUST00000158328	SNORA17.512-201
OCR_91520	chr6	17010227	17010471	-1.26009	2.33583	36.9049	9.12e-08	3.03e-06	Treg_IK_StimVSTreg_IK_Unstim	ENSMUST00000140746	Gm15473-001
OCR_41013	chr15	64115946	64116508	-1.00506	2.97871	36.8974	9.14e-08	3.03e-06	Treg_IK_StimVSTreg_IK_Unstim	ENSMUST00000176516	Asap1-012
OCR_41983	chr15	80392850	80393341	-1.1692	2.81691	36.8431	9.3e-08	3.07e-06	Treg_IK_StimVSTreg_IK_Unstim	ENSMUST00000096347	Enthd1-201
OCR_106653	chr8	35187884	35188148	-1.23288	2.59632	36.7845	9.47e-08	3.12e-06	Treg_IK_StimVSTreg_IK_Unstim	ENSMUST00000095345	Mboat4-201
OCR_15105	chr10	117631975	117632603	-1.27295	2.395	36.6919	9.75e-08	3.19e-06	Treg_IK_StimVSTreg_IK_Unstim	ENSMUST00000096691	Il22-201
OCR_105035	chr7	147393645	147394530	-1.04887	3.27827	36.6367	9.93e-08	3.23e-06	Treg_IK_StimVSTreg_IK_Unstim	ENSMUST00000051943	Olfr524-201
OCR_110997	chr8	128084669	128085203	-1.01566	3.09065	36.5523	1.02e-07	3.31e-06	Treg_IK_StimVSTreg_IK_Unstim	ENSMUST00000047850	Sipa1l2-201
OCR_33105	chr13	117782524	117782958	-1.02812	2.87075	36.517	1.03e-07	3.33e-06	Treg_IK_StimVSTreg_IK_Unstim	ENSMUST00000022239	Parp8-201
OCR_81266	chr4	115894844	115895030	-1.40801	2.41292	37.8784	1.04e-07	3.35e-06	Treg_IK_StimVSTreg_IK_Unstim	ENSMUST00000106490	Pik3r3-002
OCR_38742	chr15	5707035	5707413	1.32133	2.12356	36.4786	1.04e-07	3.37e-06	Treg_IK_StimVSTreg_IK_Unstim	ENSMUST00000104217	SNORA17.133-201
OCR_101568	chr7	82777866	82778170	-1.13805	2.50973	36.4484	1.05e-07	3.39e-06	Treg_IK_StimVSTreg_IK_Unstim	ENSMUST00000137959	Akap13-007
OCR_86173	chr5	54451111	54451703	-1.0246	2.99995	36.3382	1.09e-07	3.49e-06	Treg_IK_StimVSTreg_IK_Unstim	ENSMUST00000155608	Stim2-003
OCR_94651	chr6	88732784	88733471	-1.1198	2.9509	36.324	1.1e-07	3.5e-06	Treg_IK_StimVSTreg_IK_Unstim	ENSMUST00000089449	Mgll-003
OCR_14506	chr10	107370613	107371011	-1.05025	2.95706	36.3768	1.11e-07	3.53e-06	Treg_IK_StimVSTreg_IK_Unstim	ENSMUST00000165341	Otogl-201
OCR_9413	chr10	12855031	12855787	-1.20347	2.6141	36.1724	1.15e-07	3.65e-06	Treg_IK_StimVSTreg_IK_Unstim	ENSMUST00000068371	Plagl1-201
OCR_31604	chr13	93383154	93383396	-1.02604	2.92829	36.158	1.16e-07	3.66e-06	Treg_IK_StimVSTreg_IK_Unstim	ENSMUST00000049488	Serinc5-201
OCR_92036	chr6	31075315	31075529	-1.01039	3.01343	36.0903	1.18e-07	3.72e-06	Treg_IK_StimVSTreg_IK_Unstim	ENSMUST00000064995	Gm13835-201
OCR_8952	chr10	4897455	4898504	-1.00113	3.57248	36.0788	1.19e-07	3.73e-06	Treg_IK_StimVSTreg_IK_Unstim	ENSMUST00000104408	U6.521-201
OCR_15296	chr10	120416959	120417145	-1.01466	3.14178	36.0376	1.2e-07	3.77e-06	Treg_IK_StimVSTreg_IK_Unstim	ENSMUST00000119944	Lemd3-001
OCR_54384	chr18	32430773	32431455	-1.28494	2.38469	35.9682	1.23e-07	3.83e-06	Treg_IK_StimVSTreg_IK_Unstim	ENSMUST00000129023	Ercc3-003
OCR_70769	chr3	37191457	37191984	-1.339	2.11178	35.9464	1.24e-07	3.85e-06	Treg_IK_StimVSTreg_IK_Unstim	ENSMUST00000164285	Cetn4-201
OCR_3428	chr1	90139199	90139553	1.01789	3.48387	35.9305	1.24e-07	3.86e-06	Treg_IK_StimVSTreg_IK_Unstim	ENSMUST00000142632	Heatr7b1-004
OCR_37742	chr14	104871069	104871349	-1.03002	2.95046	35.8925	1.26e-07	3.9e-06	Treg_IK_StimVSTreg_IK_Unstim	ENSMUST00000053016	Pou4f1-001
OCR_67945	chr2	158499165	158499569	-1.01843	3.05223	35.853	1.28e-07	3.94e-06	Treg_IK_StimVSTreg_IK_Unstim	ENSMUST00000163423	Ppp1r16b-202
OCR_112720	chr9	40920545	40921132	1.36874	2.15815	35.7629	1.31e-07	4.04e-06	Treg_IK_StimVSTreg_IK_Unstim	ENSMUST00000151485	Ubash3b-002
OCR_21014	chr11	109514576	109514793	-1.457	1.74985	35.7529	1.32e-07	4.04e-06	Treg_IK_StimVSTreg_IK_Unstim	ENSMUST00000164771	Prkar1a-202
OCR_47737	chr16	91489992	91490259	-1.19037	2.50688	35.7476	1.32e-07	4.05e-06	Treg_IK_StimVSTreg_IK_Unstim	ENSMUST00000129878	Ifnar1-005
OCR_99203	chr7	25246424	25246721	-1.01938	3.08697	35.6099	1.38e-07	4.2e-06	Treg_IK_StimVSTreg_IK_Unstim	ENSMUST00000002284	Plaur-201
OCR_1974	chr1	59012499	59012969	-1.00028	3.09263	35.5884	1.39e-07	4.23e-06	Treg_IK_StimVSTreg_IK_Unstim	ENSMUST00000174120	Trak2-002
OCR_26608	chr12	111728314	111728527	-1.3025	2.20497	35.5171	1.42e-07	4.31e-06	Treg_IK_StimVSTreg_IK_Unstim	ENSMUST00000017987	Ppp2r5c-201
OCR_80051	chr4	88521431	88522051	-1.01442	2.88106	35.5013	1.43e-07	4.32e-06	Treg_IK_StimVSTreg_IK_Unstim	ENSMUST00000056014	Ifne-001
OCR_2139	chr1	61011513	61011960	-1.00928	3.02468	35.4699	1.44e-07	4.36e-06	Treg_IK_StimVSTreg_IK_Unstim	ENSMUST00000121041	Gm11582-001
OCR_71325	chr3	52084437	52085131	-1.06271	2.89667	35.4514	1.45e-07	4.38e-06	Treg_IK_StimVSTreg_IK_Unstim	ENSMUST00000174738	Gm20402-001
OCR_29184	chr13	43368171	43368449	-1.19872	2.56537	35.6397	1.46e-07	4.39e-06	Treg_IK_StimVSTreg_IK_Unstim	ENSMUST00000055341	Gfod1-201
OCR_30791	chr13	75931732	75932003	1.05632	2.84284	35.4148	1.47e-07	4.42e-06	Treg_IK_StimVSTreg_IK_Unstim	ENSMUST00000104261	SNORA42.11-201
OCR_82762	chr4	137775333	137775609	-1.12597	2.54374	35.3668	1.49e-07	4.48e-06	Treg_IK_StimVSTreg_IK_Unstim	ENSMUST00000130071	Hp1bp3-005
OCR_85371	chr5	35114314	35114949	-1.36423	2.16539	35.326	1.51e-07	4.52e-06	Treg_IK_StimVSTreg_IK_Unstim	ENSMUST00000114300	Htt-201
OCR_54942	chr18	42467604	42468046	1.44657	1.86154	35.2637	1.54e-07	4.6e-06	Treg_IK_StimVSTreg_IK_Unstim	ENSMUST00000175194	AC125110.1-201
OCR_117313	chrX	50283363	50283838	-1.04598	2.79953	35.2388	1.56e-07	4.63e-06	Treg_IK_StimVSTreg_IK_Unstim	ENSMUST00000101587	Phf6-003
OCR_51993	chr17	71318042	71318398	-1.13382	2.51357	35.2021	1.57e-07	4.68e-06	Treg_IK_StimVSTreg_IK_Unstim	ENSMUST00000137537	Myl12b-003
OCR_11969	chr10	62771369	62771704	-1.15111	2.59649	35.184	1.58e-07	4.7e-06	Treg_IK_StimVSTreg_IK_Unstim	ENSMUST00000169827	Gm17291-201
OCR_112421	chr9	32507259	32507521	-1.004	3.10955	35.1655	1.59e-07	4.71e-06	Treg_IK_StimVSTreg_IK_Unstim	ENSMUST00000034534	Ets1-201
OCR_26012	chr12	102139184	102139439	-1.05186	3.03022	35.1182	1.67e-07	4.9e-06	Treg_IK_StimVSTreg_IK_Unstim	ENSMUST00000128306	Gpr68-004
OCR_19324	chr11	79490784	79491308	-1.03837	2.976	35.0104	1.7e-07	4.97e-06	Treg_IK_StimVSTreg_IK_Unstim	ENSMUST00000123067	4930542H20Rik-002
OCR_77981	chr4	35008115	35008721	1.38896	2.26871	36.4091	1.72e-07	5.03e-06	Treg_IK_StimVSTreg_IK_Unstim	ENSMUST00000058595	Ifnk-001
OCR_2978	chr1	79700137	79700559	-1.39603	1.81096	34.8608	1.76e-07	5.11e-06	Treg_IK_StimVSTreg_IK_Unstim	ENSMUST00000127771	Wdfy1-007
OCR_6810	chr1	165833450	165834000	-1.07489	2.78313	34.855	1.76e-07	5.12e-06	Treg_IK_StimVSTreg_IK_Unstim	ENSMUST00000161908	Scyl3-003
OCR_101959	chr7	88151625	88152309	1.29944	2.10022	34.8047	1.79e-07	5.2e-06	Treg_IK_StimVSTreg_IK_Unstim	ENSMUST00000005761	Zfp592-201
OCR_55388	chr18	54097628	54097835	-1.89053	1.58093	36.2518	1.81e-07	5.23e-06	Treg_IK_StimVSTreg_IK_Unstim	ENSMUST00000091897	Gm5507-201
OCR_101723	chr7	85847445	85847929	1.39673	2.30559	35.7293	1.84e-07	5.33e-06	Treg_IK_StimVSTreg_IK_Unstim	ENSMUST00000032841	Mrpl46-001
OCR_11970	chr10	62771767	62772091	-1.01992	2.83915	34.6473	1.88e-07	5.43e-06	Treg_IK_StimVSTreg_IK_Unstim	ENSMUST00000169827	Gm17291-201
OCR_84243	chr5	8839703	8840032	-1.14844	2.79912	34.8214	1.91e-07	5.49e-06	Treg_IK_StimVSTreg_IK_Unstim	ENSMUST00000152470	Gm5106-201
OCR_47978	chr16	94795678	94795873	-1.18864	2.59634	34.5264	1.96e-07	5.61e-06	Treg_IK_StimVSTreg_IK_Unstim	ENSMUST00000155791	Dyrk1a-004
OCR_118024	chrX	127492958	127493472	-1.59135	1.82117	34.6052	1.99e-07	5.67e-06	Treg_IK_StimVSTreg_IK_Unstim	ENSMUST00000104191	SNORA17.122-201
OCR_5580	chr1	141076031	141076822	-1.00574	3.05507	34.4491	2.01e-07	5.72e-06	Treg_IK_StimVSTreg_IK_Unstim	ENSMUST00000129972	Gm16304-001
OCR_67136	chr2	146435947	146436312	-1.42815	2.16396	34.4495	2.01e-07	5.72e-06	Treg_IK_StimVSTreg_IK_Unstim	ENSMUST00000157276	U3.20-201
OCR_62489	chr2	51004464	51004923	-1.06443	3.139	35.681	2.01e-07	5.72e-06	Treg_IK_StimVSTreg_IK_Unstim	ENSMUST00000140864	Rnd3-003
OCR_99250	chr7	25703850	25704532	1.55384	1.9293	34.6253	2.02e-07	5.74e-06	Treg_IK_StimVSTreg_IK_Unstim	ENSMUST00000129928	Arhgef1-012
OCR_98312	chr6	146828563	146829084	-1.12834	2.38666	34.4054	2.04e-07	5.77e-06	Treg_IK_StimVSTreg_IK_Unstim	ENSMUST00000016631	Ppfibp1-001
OCR_42081	chr15	81131207	81131456	-1.09937	2.80666	34.2017	2.18e-07	6.09e-06	Treg_IK_StimVSTreg_IK_Unstim	ENSMUST00000023040	Slc25a17-201
OCR_77753	chr4	32329971	32330238	-1.11014	2.70801	34.1992	2.18e-07	6.09e-06	Treg_IK_StimVSTreg_IK_Unstim	ENSMUST00000165661	D130062J21Rik-201
OCR_104427	chr7	138515430	138515734	-1.27919	2.34313	34.1708	2.2e-07	6.13e-06	Treg_IK_StimVSTreg_IK_Unstim	ENSMUST00000141914	Pstk-004
OCR_102632	chr7	105847085	105847434	-1.07655	2.67879	34.13	2.23e-07	6.19e-06	Treg_IK_StimVSTreg_IK_Unstim	ENSMUST00000148776	Gm15506-001
OCR_47292	chr16	81704873	81705649	1.33217	2.24656	34.0704	2.28e-07	6.29e-06	Treg_IK_StimVSTreg_IK_Unstim	ENSMUST00000099583	Ncam2-201
OCR_11551	chr10	57164743	57165128	1.4904	2.08832	34.0618	2.28e-07	6.3e-06	Treg_IK_StimVSTreg_IK_Unstim	ENSMUST00000150743	4930467K11Rik-201
OCR_111800	chr9	15519647	15519979	-1.36179	2.2324	33.8181	2.47e-07	6.76e-06	Treg_IK_StimVSTreg_IK_Unstim	ENSMUST00000061568	Slc36a4-001
OCR_5564	chr1	140827371	140827951	-1.14505	2.49058	33.8011	2.49e-07	6.79e-06	Treg_IK_StimVSTreg_IK_Unstim	ENSMUST00000070283	Dennd1b-002
OCR_45769	chr16	44772690	44773145	-1.0973	2.80727	34.0312	2.52e-07	6.86e-06	Treg_IK_StimVSTreg_IK_Unstim	ENSMUST00000134625	Cd200r1-002
OCR_8545	chr1	193013865	193014083	-1.15928	2.66433	33.9328	2.54e-07	6.91e-06	Treg_IK_StimVSTreg_IK_Unstim	ENSMUST00000027941	Atf3-001
OCR_29331	chr13	45744474	45745136	-1.07419	3.26857	37.2578	2.63e-07	7.14e-06	Treg_IK_StimVSTreg_IK_Unstim	ENSMUST00000129176	Gmpr-003
OCR_34748	chr14	32561266	32561943	-1.08672	2.66812	33.6124	2.65e-07	7.17e-06	Treg_IK_StimVSTreg_IK_Unstim	ENSMUST00000014640	Ankrd28-201
OCR_29258	chr13	44415774	44416016	-1.20096	2.43562	33.599	2.66e-07	7.19e-06	Treg_IK_StimVSTreg_IK_Unstim	ENSMUST00000159595	Gm5083-002
OCR_106299	chr8	26154488	26155037	-1.08191	2.58214	33.5213	2.73e-07	7.36e-06	Treg_IK_StimVSTreg_IK_Unstim	ENSMUST00000084031	Htra4-001
OCR_30301	chr13	66702364	66703270	1.2906	2.34113	33.4961	2.75e-07	7.41e-06	Treg_IK_StimVSTreg_IK_Unstim	ENSMUST00000071320	Zfp640-201
OCR_30992	chr13	81491319	81491707	-1.24404	2.46091	33.4482	2.79e-07	7.52e-06	Treg_IK_StimVSTreg_IK_Unstim	ENSMUST00000128120	Gpr98-010
OCR_5014	chr1	133357369	133358218	-1.04072	2.79462	33.4026	2.83e-07	7.61e-06	Treg_IK_StimVSTreg_IK_Unstim	ENSMUST00000102332	AC109299.1-201
OCR_103075	chr7	114802645	114803141	-1.07179	3.05669	33.3294	2.9e-07	7.78e-06	Treg_IK_StimVSTreg_IK_Unstim	ENSMUST00000060348	5330417H12Rik-201
OCR_64471	chr2	92032397	92032617	-1.59782	1.73944	33.3266	2.91e-07	7.78e-06	Treg_IK_StimVSTreg_IK_Unstim	ENSMUST00000158014	Mir1955-201
OCR_59085	chr19	43514751	43515501	1.52503	1.95076	33.4304	2.91e-07	7.78e-06	Treg_IK_StimVSTreg_IK_Unstim	ENSMUST00000165311	Cnnm1-202
OCR_20443	chr11	100704699	100704923	-1.42567	2.13581	33.2844	2.95e-07	7.87e-06	Treg_IK_StimVSTreg_IK_Unstim	ENSMUST00000126266	Stat5b-003
OCR_29957	chr13	58218035	58218518	-1.0492	2.72186	33.2507	2.98e-07	7.95e-06	Treg_IK_StimVSTreg_IK_Unstim	ENSMUST00000160860	Klhl3-001
OCR_90942	chr5	151724013	151724595	-1.29862	2.16168	33.2494	2.98e-07	7.95e-06	Treg_IK_StimVSTreg_IK_Unstim	ENSMUST00000157084	U3.16-201
OCR_71229	chr3	51146313	51146693	-1.06138	2.80833	33.2181	3.01e-07	8.02e-06	Treg_IK_StimVSTreg_IK_Unstim	ENSMUST00000135496	Elf2-005
OCR_8085	chr1	186561810	186562062	-1.48674	1.79022	33.1338	3.1e-07	8.22e-06	Treg_IK_StimVSTreg_IK_Unstim	ENSMUST00000048572	Hlx-001
OCR_113691	chr9	61596275	61597391	1.02579	2.95188	33.113	3.12e-07	8.25e-06	Treg_IK_StimVSTreg_IK_Unstim	ENSMUST00000008036	Rplp1-201
OCR_52846	chr17	84808079	84808503	-1.08925	2.70216	33.1004	3.13e-07	8.27e-06	Treg_IK_StimVSTreg_IK_Unstim	ENSMUST00000083222	U6.241-201
OCR_109526	chr8	106502866	106503339	-1.31983	2.213	33.0719	3.16e-07	8.33e-06	Treg_IK_StimVSTreg_IK_Unstim	ENSMUST00000034339	Cdh5-201
OCR_32816	chr13	112765925	112766209	-1.38572	2.10947	33.002	3.24e-07	8.49e-06	Treg_IK_StimVSTreg_IK_Unstim	ENSMUST00000142621	Gm15322-001
OCR_118637	chrX	166579610	166580446	1.34449	2.37498	33.0801	3.27e-07	8.55e-06	Treg_IK_StimVSTreg_IK_Unstim	ENSMUST00000119796	Gm15068-001
OCR_103452	chr7	121375285	121375741	1.1719	2.30039	32.8773	3.37e-07	8.8e-06	Treg_IK_StimVSTreg_IK_Unstim	ENSMUST00000033012	Copb1-201
OCR_90491	chr5	144278342	144278606	-1.16829	2.55738	32.8745	3.38e-07	8.81e-06	Treg_IK_StimVSTreg_IK_Unstim	ENSMUST00000131513	Rac1-004
OCR_111273	chr8	131208533	131208847	-1.1079	2.62568	32.847	3.41e-07	8.88e-06	Treg_IK_StimVSTreg_IK_Unstim	ENSMUST00000090006	Itgb1-001
OCR_94555	chr6	87344642	87345584	-1.02942	2.70264	32.7757	3.49e-07	9.06e-06	Treg_IK_StimVSTreg_IK_Unstim	ENSMUST00000032127	Gkn3-001
OCR_35313	chr14	47504986	47505528	-1.03847	2.72251	32.6849	3.6e-07	9.31e-06	Treg_IK_StimVSTreg_IK_Unstim	ENSMUST00000137543	Samd4-002
OCR_313	chr1	13374383	13374720	-1.36017	2.07755	32.553	3.76e-07	9.66e-06	Treg_IK_StimVSTreg_IK_Unstim	ENSMUST00000068304	Ncoa2-201
OCR_38814	chr15	6675516	6675819	-1.43581	1.84464	32.5542	3.76e-07	9.66e-06	Treg_IK_StimVSTreg_IK_Unstim	ENSMUST00000168540	Rictor-202
OCR_102890	chr7	109397236	109397434	-1.09098	2.59272	32.4886	3.84e-07	9.83e-06	Treg_IK_StimVSTreg_IK_Unstim	ENSMUST00000106923	Rhog-002
OCR_83917	chr4	154546224	154546458	-1.52963	1.93904	32.4452	3.9e-07	9.95e-06	Treg_IK_StimVSTreg_IK_Unstim	ENSMUST00000129314	Ski-002
OCR_90192	chr5	139691097	139691678	1.09273	2.59461	32.4226	3.93e-07	9.98e-06	Treg_IK_StimVSTreg_IK_Unstim	ENSMUST00000129079	Sun1-014
OCR_62746	chr2	58036639	58036986	-1.10104	2.63029	32.3899	3.97e-07	1.01e-05	Treg_IK_StimVSTreg_IK_Unstim	ENSMUST00000144117	Cytip-006
OCR_92039	chr6	31082254	31082755	-1.27727	2.28582	32.3805	3.98e-07	1.01e-05	Treg_IK_StimVSTreg_IK_Unstim	ENSMUST00000064995	Gm13835-201
OCR_101767	chr7	86446243	86446505	-1.14415	2.52862	32.3165	4.07e-07	1.03e-05	Treg_IK_StimVSTreg_IK_Unstim	ENSMUST00000135333	Abhd2-002
OCR_15221	chr10	119560887	119561185	-1.31386	2.19762	32.2963	4.1e-07	1.03e-05	Treg_IK_StimVSTreg_IK_Unstim	ENSMUST00000020449	Helb-001
OCR_61650	chr2	32839175	32839648	-1.04623	2.76429	32.2477	4.16e-07	1.05e-05	Treg_IK_StimVSTreg_IK_Unstim	ENSMUST00000123643	Slc2a8-002
OCR_32888	chr13	113368256	113368600	1.49624	1.96094	32.1799	4.26e-07	1.06e-05	Treg_IK_StimVSTreg_IK_Unstim	ENSMUST00000051756	Il31ra-201
OCR_23492	chr12	40939151	40939537	-1.19248	2.27847	32.1082	4.36e-07	1.09e-05	Treg_IK_StimVSTreg_IK_Unstim	ENSMUST00000165676	Gm17024-001
OCR_112425	chr9	32516135	32516450	-1.01575	2.91456	32.0765	4.41e-07	1.1e-05	Treg_IK_StimVSTreg_IK_Unstim	ENSMUST00000034534	Ets1-201
OCR_114631	chr9	83443401	83443832	-1.1757	2.71503	32.0393	4.46e-07	1.11e-05	Treg_IK_StimVSTreg_IK_Unstim	ENSMUST00000085286	Sh3bgrl2-202
OCR_115387	chr9	100983787	100984036	-1.10621	2.48157	32.0267	4.48e-07	1.11e-05	Treg_IK_StimVSTreg_IK_Unstim	ENSMUST00000085177	Msl2-201
OCR_2513	chr1	69702034	69702326	-1.05971	2.72995	31.9735	4.56e-07	1.13e-05	Treg_IK_StimVSTreg_IK_Unstim	ENSMUST00000027146	Ikzf2-201
OCR_89322	chr5	124465619	124465905	-1.31575	2.13211	31.9317	4.63e-07	1.14e-05	Treg_IK_StimVSTreg_IK_Unstim	ENSMUST00000166684	Hip1r-006
OCR_95985	chr6	114728616	114728945	-1.17495	2.27257	31.9153	4.65e-07	1.15e-05	Treg_IK_StimVSTreg_IK_Unstim	ENSMUST00000123478	Vgll4-006
OCR_36730	chr14	75588964	75589183	-1.19561	2.41858	31.9127	4.66e-07	1.15e-05	Treg_IK_StimVSTreg_IK_Unstim	ENSMUST00000131802	Lcp1-003
OCR_90822	chr5	149829225	149829517	-1.12493	2.59937	32.2038	4.7e-07	1.16e-05	Treg_IK_StimVSTreg_IK_Unstim	ENSMUST00000133243	Gm15411-001
OCR_14072	chr10	96086192	96086392	-1.12528	2.45023	31.7788	4.87e-07	1.19e-05	Treg_IK_StimVSTreg_IK_Unstim	ENSMUST00000038377	Btg1-201
OCR_80987	chr4	108454953	108455553	-1.21169	2.44941	31.7483	4.92e-07	1.2e-05	Treg_IK_StimVSTreg_IK_Unstim	ENSMUST00000106657	Zfyve9-001
OCR_62047	chr2	43584103	43584410	-1.23918	2.27563	31.7318	4.95e-07	1.21e-05	Treg_IK_StimVSTreg_IK_Unstim	ENSMUST00000112824	Arhgap15-002
OCR_42771	chr15	93425247	93425542	-1.02116	2.91938	31.6971	5.01e-07	1.22e-05	Treg_IK_StimVSTreg_IK_Unstim	ENSMUST00000048982	Prickle1-001
OCR_66110	chr2	127913876	127914241	-1.32418	2.15885	31.6421	5.1e-07	1.24e-05	Treg_IK_StimVSTreg_IK_Unstim	ENSMUST00000157550	U1.158-201
OCR_20795	chr11	106407145	106407670	-1.1035	2.48421	31.5151	5.33e-07	1.28e-05	Treg_IK_StimVSTreg_IK_Unstim	ENSMUST00000158896	snosnR60_Z15.1-201
OCR_92066	chr6	31169004	31169194	-1.09328	2.43192	31.4511	5.44e-07	1.31e-05	Treg_IK_StimVSTreg_IK_Unstim	ENSMUST00000115107	AB041803-001
OCR_118089	chrX	132186712	132187315	-1.23486	2.18582	31.4255	5.49e-07	1.32e-05	Treg_IK_StimVSTreg_IK_Unstim	ENSMUST00000113159	Prame-001
OCR_46188	chr16	51698366	51698877	-1.25993	2.16196	31.4117	5.51e-07	1.32e-05	Treg_IK_StimVSTreg_IK_Unstim	ENSMUST00000158778	U7.103-201
OCR_58428	chr19	25058263	25059006	-1.06986	2.80633	31.6715	5.54e-07	1.32e-05	Treg_IK_StimVSTreg_IK_Unstim	ENSMUST00000025831	Dock8-201
OCR_1818	chr1	55108635	55108839	-1.19622	2.29434	31.3921	5.55e-07	1.32e-05	Treg_IK_StimVSTreg_IK_Unstim	ENSMUST00000027125	Coq10b-201
OCR_18476	chr11	62565605	62566078	-1.36767	2.12668	31.3896	5.56e-07	1.33e-05	Treg_IK_StimVSTreg_IK_Unstim	ENSMUST00000101060	Gm10428-201
OCR_25037	chr12	81895956	81896261	-1.00823	2.69762	31.3852	5.56e-07	1.33e-05	Treg_IK_StimVSTreg_IK_Unstim	ENSMUST00000068519	4933426M11Rik-201
OCR_19714	chr11	87916754	87917208	-1.05502	2.48287	31.3302	5.67e-07	1.35e-05	Treg_IK_StimVSTreg_IK_Unstim	ENSMUST00000133149	Cuedc1-003
OCR_43040	chr15	98000810	98001209	-1.17793	2.22828	31.2394	5.85e-07	1.38e-05	Treg_IK_StimVSTreg_IK_Unstim	ENSMUST00000031914	AI836003-201
OCR_102489	chr7	104028717	104029344	-1.03342	2.87931	31.166	5.99e-07	1.41e-05	Treg_IK_StimVSTreg_IK_Unstim	ENSMUST00000158634	5S_rRNA.106-201
OCR_96791	chr6	125448035	125448516	1.32928	1.91668	31.1584	6.01e-07	1.41e-05	Treg_IK_StimVSTreg_IK_Unstim	ENSMUST00000032492	Cd9-001
OCR_112427	chr9	32518703	32518869	-1.3874	1.99305	31.0995	6.13e-07	1.44e-05	Treg_IK_StimVSTreg_IK_Unstim	ENSMUST00000034534	Ets1-201
OCR_26200	chr12	105304549	105304869	-1.04964	2.90012	31.088	6.18e-07	1.44e-05	Treg_IK_StimVSTreg_IK_Unstim	ENSMUST00000166601	Serpina4-ps1-001
OCR_52020	chr17	71545831	71546050	-1.33629	1.73236	31.0306	6.28e-07	1.46e-05	Treg_IK_StimVSTreg_IK_Unstim	ENSMUST00000135589	Lpin2-003
OCR_117203	chrX	45492907	45493325	-1.01125	2.92246	31.0307	6.28e-07	1.46e-05	Treg_IK_StimVSTreg_IK_Unstim	ENSMUST00000033427	Sash3-001
OCR_9710	chr10	18718745	18718905	-1.12151	2.5744	31.0253	6.41e-07	1.49e-05	Treg_IK_StimVSTreg_IK_Unstim	ENSMUST00000154749	Tnfaip3-006
OCR_60101	chr2	6515809	6516090	-1.04622	2.50824	30.9045	6.55e-07	1.51e-05	Treg_IK_StimVSTreg_IK_Unstim	ENSMUST00000168146	Celf2-203
OCR_1751	chr1	53996959	53997544	-1.03187	2.93748	30.8845	6.59e-07	1.52e-05	Treg_IK_StimVSTreg_IK_Unstim	ENSMUST00000157324	U1.150-201
OCR_50119	chr17	34132653	34132973	-1.05249	2.72392	30.839	6.7e-07	1.54e-05	Treg_IK_StimVSTreg_IK_Unstim	ENSMUST00000173543	H2-K1-008
OCR_32998	chr13	115094863	115095458	1.21201	2.28306	30.8127	6.76e-07	1.55e-05	Treg_IK_StimVSTreg_IK_Unstim	ENSMUST00000022286	Ndufs4-201
OCR_26610	chr12	111733600	111733789	-1.34588	1.85657	30.8034	6.78e-07	1.56e-05	Treg_IK_StimVSTreg_IK_Unstim	ENSMUST00000017987	Ppp2r5c-201
OCR_7581	chr1	178642554	178643041	-1.11609	2.6433	30.7893	6.81e-07	1.57e-05	Treg_IK_StimVSTreg_IK_Unstim	ENSMUST00000157250	U6.612-201
OCR_80030	chr4	88360135	88360561	1.13467	2.35134	30.7402	6.93e-07	1.59e-05	Treg_IK_StimVSTreg_IK_Unstim	ENSMUST00000121577	Gm13282-001
OCR_55383	chr18	54063872	54064234	-1.06629	2.76308	30.7875	6.95e-07	1.59e-05	Treg_IK_StimVSTreg_IK_Unstim	ENSMUST00000069597	Csnk1g3-201
OCR_106736	chr8	35885030	35885584	-1.08129	2.54708	30.7072	7.01e-07	1.6e-05	Treg_IK_StimVSTreg_IK_Unstim	ENSMUST00000033930	Dusp4-001
OCR_86937	chr5	76222331	76222892	-1.04062	2.59221	30.6718	7.09e-07	1.62e-05	Treg_IK_StimVSTreg_IK_Unstim	ENSMUST00000158158	AC134903.1-201
OCR_13457	chr10	88189979	88190187	-1.05432	2.63924	30.6473	7.15e-07	1.63e-05	Treg_IK_StimVSTreg_IK_Unstim	ENSMUST00000092231	Gm4925-001
OCR_92089	chr6	31362348	31362913	-1.01	2.86566	30.6266	7.2e-07	1.64e-05	Treg_IK_StimVSTreg_IK_Unstim	ENSMUST00000154954	Mkln1-010
OCR_85265	chr5	33076589	33076931	1.2848	2.82663	33.1077	7.31e-07	1.67e-05	Treg_IK_StimVSTreg_IK_Unstim	ENSMUST00000071829	Pisd-004
OCR_50416	chr17	36962482	36962851	-1.03152	2.74987	30.5733	7.33e-07	1.67e-05	Treg_IK_StimVSTreg_IK_Unstim	ENSMUST00000124307	Trim26-007
OCR_66180	chr2	128658585	128659303	1.2074	2.27305	30.5279	7.45e-07	1.69e-05	Treg_IK_StimVSTreg_IK_Unstim	ENSMUST00000143398	Tmem87b-004
OCR_107711	chr8	67634214	67634956	-1.14207	2.7471	30.3976	7.79e-07	1.76e-05	Treg_IK_StimVSTreg_IK_Unstim	ENSMUST00000175101	AC102287.1-201
OCR_36826	chr14	77482917	77484015	1.29533	2.47681	30.4014	8e-07	1.8e-05	Treg_IK_StimVSTreg_IK_Unstim	ENSMUST00000137110	Ccdc122-003
OCR_35972	chr14	61673714	61674068	-1.24147	2.24915	30.3157	8.01e-07	1.81e-05	Treg_IK_StimVSTreg_IK_Unstim	ENSMUST00000111234	Tnfrsf19-202
OCR_44200	chr16	13435853	13436036	-1.39886	1.66749	30.2936	8.07e-07	1.82e-05	Treg_IK_StimVSTreg_IK_Unstim	ENSMUST00000103784	Mir193b-201
OCR_112403	chr9	32428094	32428454	-1.10495	2.58941	30.2664	8.14e-07	1.83e-05	Treg_IK_StimVSTreg_IK_Unstim	ENSMUST00000058892	Ets1-203
OCR_14223	chr10	98632315	98632721	-1.04412	2.84233	30.1232	8.56e-07	1.91e-05	Treg_IK_StimVSTreg_IK_Unstim	ENSMUST00000162704	Poc1b-005
OCR_89625	chr5	130296523	130296770	-1.28703	2.41131	30.1872	8.63e-07	1.92e-05	Treg_IK_StimVSTreg_IK_Unstim	ENSMUST00000083370	SNORA22.1-201
OCR_88797	chr5	116167205	116167545	-1.33133	2.47426	30.0843	8.67e-07	1.92e-05	Treg_IK_StimVSTreg_IK_Unstim	ENSMUST00000117847	Ccdc64-002
OCR_92933	chr6	49879993	49880516	-1.08314	2.73105	29.9926	8.95e-07	1.98e-05	Treg_IK_StimVSTreg_IK_Unstim	ENSMUST00000031843	Npy-001
OCR_1792	chr1	54929323	54929652	1.31464	2.20292	29.9829	9.05e-07	2e-05	Treg_IK_StimVSTreg_IK_Unstim	ENSMUST00000044359	Ankrd44-201
OCR_84763	chr5	22919239	22919434	-1.12996	2.26997	29.9485	9.08e-07	2e-05	Treg_IK_StimVSTreg_IK_Unstim	ENSMUST00000101522	5031425E22Rik-201
OCR_12930	chr10	80221452	80221763	1.04787	2.51714	29.8062	9.54e-07	2.09e-05	Treg_IK_StimVSTreg_IK_Unstim	ENSMUST00000147579	Dot1l-006
OCR_41923	chr15	79764225	79764856	1.03296	2.86457	29.8445	9.57e-07	2.09e-05	Treg_IK_StimVSTreg_IK_Unstim	ENSMUST00000177061	Cbx7-009
OCR_3427	chr1	90137211	90137659	1.02887	3.6599	32.1798	9.64e-07	2.1e-05	Treg_IK_StimVSTreg_IK_Unstim	ENSMUST00000142632	Heatr7b1-004
OCR_24627	chr12	74765034	74765422	-1.21194	2.07588	29.7729	9.65e-07	2.11e-05	Treg_IK_StimVSTreg_IK_Unstim	ENSMUST00000119092	Prkch-002
OCR_56280	chr18	68374038	68374505	-1.11281	2.40016	29.7593	9.7e-07	2.11e-05	Treg_IK_StimVSTreg_IK_Unstim	ENSMUST00000025426	D18Ertd653e-201
OCR_8045	chr1	185890506	185890757	-1.18129	2.40364	29.7095	9.86e-07	2.15e-05	Treg_IK_StimVSTreg_IK_Unstim	ENSMUST00000048655	Dusp10-001
OCR_87618	chr5	98428324	98429112	-1.21268	2.09629	29.6979	9.9e-07	2.15e-05	Treg_IK_StimVSTreg_IK_Unstim	ENSMUST00000031281	Antxr2-201
OCR_4883	chr1	130620987	130621704	1.09632	2.48199	29.6869	9.94e-07	2.16e-05	Treg_IK_StimVSTreg_IK_Unstim	ENSMUST00000170031	Gm17699-201
OCR_56898	chr18	80665238	80665419	-1.10076	2.41734	29.5753	1.03e-06	2.23e-05	Treg_IK_StimVSTreg_IK_Unstim	ENSMUST00000036229	Ctdp1-001
OCR_49300	chr17	23331880	23332083	-1.31185	1.97924	29.5523	1.04e-06	2.24e-05	Treg_IK_StimVSTreg_IK_Unstim	ENSMUST00000037057	Zfp40-001
OCR_97830	chr6	142334974	142335134	-1.06554	2.66855	29.5341	1.05e-06	2.25e-05	Treg_IK_StimVSTreg_IK_Unstim	ENSMUST00000129694	Recql-009
OCR_47725	chr16	91448411	91448683	-1.14023	2.51243	29.466	1.07e-06	2.29e-05	Treg_IK_StimVSTreg_IK_Unstim	ENSMUST00000149172	A930006K02Rik-001
OCR_2191	chr1	61817842	61818302	-1.11119	2.61753	29.4057	1.1e-06	2.33e-05	Treg_IK_StimVSTreg_IK_Unstim	ENSMUST00000138535	4930448K12Rik-001
OCR_33043	chr13	115885723	115885924	-1.46091	1.61341	29.3914	1.1e-06	2.34e-05	Treg_IK_StimVSTreg_IK_Unstim	ENSMUST00000109226	Pelo-201
OCR_95735	chr6	108615424	108616027	-1.38988	5.62099	67.3728	1.13e-06	2.41e-05	Treg_IK_StimVSTreg_IK_Unstim	ENSMUST00000137478	0610040F04Rik-001
OCR_116895	chrX	11646219	11646768	-1.20274	2.45008	29.2582	1.16e-06	2.46e-05	Treg_IK_StimVSTreg_IK_Unstim	ENSMUST00000065143	Bcor-003
OCR_114078	chr9	69838264	69838485	-1.32452	1.82994	29.2162	1.17e-06	2.47e-05	Treg_IK_StimVSTreg_IK_Unstim	ENSMUST00000154772	Bnip2-004
OCR_43330	chr15	101104251	101104706	1.28701	2.18744	29.1687	1.19e-06	2.51e-05	Treg_IK_StimVSTreg_IK_Unstim	ENSMUST00000023779	Nr4a1-201
OCR_20383	chr11	100185016	100185182	-1.28568	2.05114	29.1488	1.2e-06	2.52e-05	Treg_IK_StimVSTreg_IK_Unstim	ENSMUST00000132618	Eif1-005
OCR_7863	chr1	182741823	182742090	-1.08041	2.49016	29.0977	1.22e-06	2.56e-05	Treg_IK_StimVSTreg_IK_Unstim	ENSMUST00000159789	H3f3a-007
OCR_89324	chr5	124467830	124468079	-1.38491	1.87737	29.0724	1.23e-06	2.58e-05	Treg_IK_StimVSTreg_IK_Unstim	ENSMUST00000040967	Vps37b-201
OCR_92074	chr6	31238412	31239366	1.08253	2.52657	29.0644	1.23e-06	2.58e-05	Treg_IK_StimVSTreg_IK_Unstim	ENSMUST00000138653	2210408F21Rik-012
OCR_92047	chr6	31098309	31098717	-1.27725	1.90886	29.0553	1.24e-06	2.59e-05	Treg_IK_StimVSTreg_IK_Unstim	ENSMUST00000118459	Gm13835-001
OCR_16709	chr11	19893762	19894073	-1.0988	2.61893	29.3327	1.25e-06	2.61e-05	Treg_IK_StimVSTreg_IK_Unstim	ENSMUST00000123036	Spred2-002
OCR_7840	chr1	182365049	182365352	-1.0563	2.59066	28.9472	1.28e-06	2.67e-05	Treg_IK_StimVSTreg_IK_Unstim	ENSMUST00000136521	6330403A02Rik-001
OCR_64566	chr2	93257086	93257333	-1.06556	2.48394	28.949	1.28e-06	2.67e-05	Treg_IK_StimVSTreg_IK_Unstim	ENSMUST00000126772	Cd82-010
OCR_65831	chr2	122128698	122128944	-1.07238	2.52447	28.9303	1.29e-06	2.68e-05	Treg_IK_StimVSTreg_IK_Unstim	ENSMUST00000155561	Duoxa1-003
OCR_29189	chr13	43402028	43402308	-1.26777	2.24794	29.3289	1.3e-06	2.7e-05	Treg_IK_StimVSTreg_IK_Unstim	ENSMUST00000055341	Gfod1-201
OCR_11684	chr10	59173045	59173394	-1.27351	2.15562	28.8991	1.31e-06	2.7e-05	Treg_IK_StimVSTreg_IK_Unstim	ENSMUST00000164702	Gm17148-001
OCR_38993	chr15	10513075	10513535	-1.18657	2.34314	28.8661	1.32e-06	2.73e-05	Treg_IK_StimVSTreg_IK_Unstim	ENSMUST00000064353	Gm8174-001
OCR_9468	chr10	13739227	13739560	-1.24853	1.88975	28.8581	1.33e-06	2.74e-05	Treg_IK_StimVSTreg_IK_Unstim	ENSMUST00000171012	Gm8330-201
OCR_89451	chr5	125924498	125924746	-1.21006	2.20017	28.8553	1.33e-06	2.74e-05	Treg_IK_StimVSTreg_IK_Unstim	ENSMUST00000049040	Bri3bp-201
OCR_17013	chr11	24347520	24348193	-1.23682	2.32114	28.9241	1.33e-06	2.75e-05	Treg_IK_StimVSTreg_IK_Unstim	ENSMUST00000153153	Gm12068-001
OCR_45706	chr16	43805542	43806001	1.19598	2.10787	28.8261	1.34e-06	2.76e-05	Treg_IK_StimVSTreg_IK_Unstim	ENSMUST00000175393	CT025520.1-201
OCR_8048	chr1	185900378	185900592	-1.52187	1.5316	28.7934	1.36e-06	2.79e-05	Treg_IK_StimVSTreg_IK_Unstim	ENSMUST00000048655	Dusp10-001
OCR_31648	chr13	94124854	94125462	-1.06037	2.7407	28.6989	1.4e-06	2.86e-05	Treg_IK_StimVSTreg_IK_Unstim	ENSMUST00000109489	Homer1-201
OCR_88386	chr5	111132873	111133583	1.23311	2.10167	28.5957	1.45e-06	2.94e-05	Treg_IK_StimVSTreg_IK_Unstim	ENSMUST00000125325	Ep400-006
OCR_93107	chr6	52868983	52869590	-1.00697	2.61724	28.4996	1.5e-06	3.03e-05	Treg_IK_StimVSTreg_IK_Unstim	ENSMUST00000136250	Jazf1-002
OCR_101931	chr7	87977919	87978199	-1.04962	2.39511	28.4747	1.52e-06	3.05e-05	Treg_IK_StimVSTreg_IK_Unstim	ENSMUST00000132163	Zscan2-002
OCR_51474	chr17	61098093	61099097	1.21133	2.34744	28.4704	1.52e-06	3.06e-05	Treg_IK_StimVSTreg_IK_Unstim	ENSMUST00000158985	7SK.327-201
OCR_114306	chr9	75288596	75288779	-1.09509	2.28267	28.4253	1.54e-06	3.1e-05	Treg_IK_StimVSTreg_IK_Unstim	ENSMUST00000048937	Leo1-201
OCR_75068	chr3	135292890	135293352	-1.11512	2.68033	29.3207	1.55e-06	3.11e-05	Treg_IK_StimVSTreg_IK_Unstim	ENSMUST00000129428	Nfkb1-003
OCR_89246	chr5	123485504	123485842	-1.32524	2.09705	28.407	1.59e-06	3.19e-05	Treg_IK_StimVSTreg_IK_Unstim	ENSMUST00000129934	Morn3-005
OCR_54153	chr18	24000066	24000284	-1.02562	2.6084	28.2922	1.62e-06	3.23e-05	Treg_IK_StimVSTreg_IK_Unstim	ENSMUST00000158665	U6.881-201
OCR_112430	chr9	32520761	32521070	-1.09507	2.47229	28.2263	1.65e-06	3.29e-05	Treg_IK_StimVSTreg_IK_Unstim	ENSMUST00000034534	Ets1-201
OCR_57857	chr19	7531322	7531908	-1.03929	2.41741	28.216	1.66e-06	3.3e-05	Treg_IK_StimVSTreg_IK_Unstim	ENSMUST00000088169	Rtn3-203
OCR_11921	chr10	61953694	61953976	-1.10274	2.65443	28.2687	1.7e-06	3.38e-05	Treg_IK_StimVSTreg_IK_Unstim	ENSMUST00000105447	Vps26a-203
OCR_9110	chr10	7415148	7415659	-1.04898	2.49707	28.1124	1.72e-06	3.39e-05	Treg_IK_StimVSTreg_IK_Unstim	ENSMUST00000040043	Lats1-201
OCR_47732	chr16	91466442	91466605	-1.20113	2.16292	28.1129	1.72e-06	3.39e-05	Treg_IK_StimVSTreg_IK_Unstim	ENSMUST00000149172	A930006K02Rik-001
OCR_53484	chr18	6055537	6055956	-1.00584	2.54067	28.0757	1.74e-06	3.43e-05	Treg_IK_StimVSTreg_IK_Unstim	ENSMUST00000169809	Arhgap12-202
OCR_47986	chr16	94825109	94825356	-1.09765	2.39489	28.0659	1.75e-06	3.44e-05	Treg_IK_StimVSTreg_IK_Unstim	ENSMUST00000119372	Gm15971-001
OCR_3102	chr1	82290760	82290994	-1.212	1.85368	28.0608	1.75e-06	3.44e-05	Treg_IK_StimVSTreg_IK_Unstim	ENSMUST00000069799	Irs1-001
OCR_33669	chr14	15184507	15184677	-1.2197	2.08572	28.0076	1.79e-06	3.49e-05	Treg_IK_StimVSTreg_IK_Unstim	ENSMUST00000170743	Il3ra-203
OCR_106296	chr8	26128473	26128672	-1.06957	2.51453	27.9491	1.82e-06	3.55e-05	Treg_IK_StimVSTreg_IK_Unstim	ENSMUST00000033961	Tm2d2-201
OCR_104510	chr7	139991157	139991367	-1.00729	2.49587	27.8767	1.87e-06	3.63e-05	Treg_IK_StimVSTreg_IK_Unstim	ENSMUST00000148303	Fam53b-005
OCR_84918	chr5	24961035	24961588	-1.37422	1.62925	27.8304	1.9e-06	3.68e-05	Treg_IK_StimVSTreg_IK_Unstim	ENSMUST00000172802	Gm18343-001
OCR_64366	chr2	90421966	90422259	-1.05896	2.48107	27.7924	1.93e-06	3.72e-05	Treg_IK_StimVSTreg_IK_Unstim	ENSMUST00000026352	Ptprj-201
OCR_37504	chr14	100681943	100682202	-1.19482	2.11895	27.7348	1.97e-06	3.79e-05	Treg_IK_StimVSTreg_IK_Unstim	ENSMUST00000155141	Gm16260-001
OCR_115516	chr9	103526999	103527462	-1.07465	2.63756	27.7034	1.99e-06	3.82e-05	Treg_IK_StimVSTreg_IK_Unstim	ENSMUST00000158872	U6.917-201
OCR_27287	chr13	3371865	3372974	1.05332	3.78996	31.7304	2.04e-06	3.9e-05	Treg_IK_StimVSTreg_IK_Unstim	ENSMUST00000150631	2810429I04Rik-203
OCR_12184	chr10	67756885	67757339	1.23586	1.70464	27.5903	2.07e-06	3.95e-05	Treg_IK_StimVSTreg_IK_Unstim	ENSMUST00000020106	Arid5b-201
OCR_85074	chr5	28723897	28724226	1.2004	2.07939	27.5247	2.12e-06	4.02e-05	Treg_IK_StimVSTreg_IK_Unstim	ENSMUST00000144967	Rbm33-005
OCR_13143	chr10	82453409	82453762	-1.17324	1.94844	27.4431	2.18e-06	4.13e-05	Treg_IK_StimVSTreg_IK_Unstim	ENSMUST00000040110	Chst11-001
OCR_18567	chr11	66706718	66707577	1.5838	2.04077	28.4244	2.22e-06	4.19e-05	Treg_IK_StimVSTreg_IK_Unstim	ENSMUST00000123434	Pirt-001
OCR_63510	chr2	71624213	71624424	-1.0796	2.43013	27.3298	2.27e-06	4.26e-05	Treg_IK_StimVSTreg_IK_Unstim	ENSMUST00000152009	Itga6-003
OCR_106321	chr8	26259427	26260049	-1.2261	2.21158	27.624	2.27e-06	4.26e-05	Treg_IK_StimVSTreg_IK_Unstim	ENSMUST00000064883	Plekha2-001
OCR_96754	chr6	125216689	125216898	-1.14906	2.49007	27.7071	2.29e-06	4.28e-05	Treg_IK_StimVSTreg_IK_Unstim	ENSMUST00000158931	SNORA70.40-201
OCR_38879	chr15	8235917	8236317	-1.13081	2.38161	27.221	2.36e-06	4.41e-05	Treg_IK_StimVSTreg_IK_Unstim	ENSMUST00000128772	2410089E03Rik-002
OCR_53343	chr18	3117926	3118655	1.16628	2.36263	27.1952	2.38e-06	4.44e-05	Treg_IK_StimVSTreg_IK_Unstim	ENSMUST00000165255	Vmn1r238-001
OCR_118391	chrX	156170874	156171203	-1.03374	2.65465	27.1762	2.4e-06	4.47e-05	Treg_IK_StimVSTreg_IK_Unstim	ENSMUST00000141354	Sh3kbp1-003
OCR_15990	chr11	3127052	3127658	1.0172	2.51745	27.1677	2.4e-06	4.48e-05	Treg_IK_StimVSTreg_IK_Unstim	ENSMUST00000132425	Eif4enif1-005
OCR_49368	chr17	24222087	24222344	-1.24853	1.77504	27.136	2.43e-06	4.52e-05	Treg_IK_StimVSTreg_IK_Unstim	ENSMUST00000147199	Pdpk1-011
OCR_81746	chr4	123428074	123428292	-1.03529	2.47414	27.0889	2.47e-06	4.58e-05	Treg_IK_StimVSTreg_IK_Unstim	ENSMUST00000102636	Akirin1-001
OCR_49304	chr17	23570171	23570896	1.08247	2.80186	27.05	2.54e-06	4.69e-05	Treg_IK_StimVSTreg_IK_Unstim	ENSMUST00000176907	Vmn2r-ps134-001
OCR_111532	chr9	11578900	11579428	-1.15695	2.25421	27.0075	2.55e-06	4.69e-05	Treg_IK_StimVSTreg_IK_Unstim	ENSMUST00000104362	CT009748.1-201
OCR_1930	chr1	58472389	58472640	-1.18708	2.28808	26.9704	2.58e-06	4.75e-05	Treg_IK_StimVSTreg_IK_Unstim	ENSMUST00000123580	Clk1-006
OCR_28664	chr13	30967477	30968051	1.01618	2.66289	26.971	2.58e-06	4.75e-05	Treg_IK_StimVSTreg_IK_Unstim	ENSMUST00000102943	Hus1b-001
OCR_22222	chr12	12945781	12946069	-1.29646	2.37843	27.6427	2.58e-06	4.75e-05	Treg_IK_StimVSTreg_IK_Unstim	ENSMUST00000130990	Mycn-002
OCR_69123	chr2	174468994	174470125	1.20129	2.50782	27.0774	2.59e-06	4.76e-05	Treg_IK_StimVSTreg_IK_Unstim	ENSMUST00000059452	Zfp831-001
OCR_88118	chr5	106404454	106405058	-1.16657	1.99026	26.948	2.6e-06	4.78e-05	Treg_IK_StimVSTreg_IK_Unstim	ENSMUST00000147683	Zfp326-005
OCR_61949	chr2	38436609	38437226	1.20529	1.92252	26.9433	2.6e-06	4.78e-05	Treg_IK_StimVSTreg_IK_Unstim	ENSMUST00000121784	Gm13586-001
OCR_4620	chr1	124253420	124253913	1.08998	2.67808	26.9012	2.64e-06	4.84e-05	Treg_IK_StimVSTreg_IK_Unstim	ENSMUST00000158649	U1.197-201
OCR_47584	chr16	89113926	89114616	1.35905	2.11918	26.8904	2.65e-06	4.85e-05	Treg_IK_StimVSTreg_IK_Unstim	ENSMUST00000089101	Gm6358-201
OCR_96755	chr6	125217532	125217758	-1.113	2.3502	26.8866	2.66e-06	4.86e-05	Treg_IK_StimVSTreg_IK_Unstim	ENSMUST00000158931	SNORA70.40-201
OCR_104054	chr7	132751780	132751976	-1.23166	2.09599	26.8567	2.69e-06	4.89e-05	Treg_IK_StimVSTreg_IK_Unstim	ENSMUST00000084605	Il21r-202
OCR_60079	chr2	6394953	6395169	-1.06514	2.56793	26.8488	2.69e-06	4.9e-05	Treg_IK_StimVSTreg_IK_Unstim	ENSMUST00000128589	Gm13391-001
OCR_87576	chr5	97435997	97436437	-1.01045	2.68991	26.9422	2.73e-06	4.95e-05	Treg_IK_StimVSTreg_IK_Unstim	ENSMUST00000112974	Bmp2k-002
OCR_34030	chr14	20831612	20832104	-1.10254	2.54886	26.7726	2.77e-06	5e-05	Treg_IK_StimVSTreg_IK_Unstim	ENSMUST00000159073	Gng2-002
OCR_55866	chr18	61709303	61709714	-1.21646	1.84494	26.7292	2.81e-06	5.06e-05	Treg_IK_StimVSTreg_IK_Unstim	ENSMUST00000165123	Csnk1a1-001
OCR_53062	chr17	87862345	87862834	-1.1453	2.04995	26.7272	2.81e-06	5.06e-05	Treg_IK_StimVSTreg_IK_Unstim	ENSMUST00000158802	SNORA17.585-201
OCR_84018	chr4	155602381	155603172	1.24254	2.17862	26.6412	2.9e-06	5.2e-05	Treg_IK_StimVSTreg_IK_Unstim	ENSMUST00000105571	Plekhn1-201
OCR_86126	chr5	53862073	53862733	1.14857	2.20342	26.6354	2.91e-06	5.21e-05	Treg_IK_StimVSTreg_IK_Unstim	ENSMUST00000158021	5S_rRNA.63-201
OCR_61556	chr2	32036951	32037352	-1.19845	2.15371	26.5144	3.04e-06	5.4e-05	Treg_IK_StimVSTreg_IK_Unstim	ENSMUST00000069817	Prrc2b-201
OCR_70788	chr3	37329232	37329834	1.16645	1.98701	26.4776	3.08e-06	5.45e-05	Treg_IK_StimVSTreg_IK_Unstim	ENSMUST00000124347	Spata5-005
OCR_95205	chr6	97755784	97756005	-1.2488	2.19429	26.4267	3.13e-06	5.53e-05	Treg_IK_StimVSTreg_IK_Unstim	ENSMUST00000148233	Mitf-002
OCR_92781	chr6	47728808	47729014	-1.38016	1.72784	26.3948	3.17e-06	5.58e-05	Treg_IK_StimVSTreg_IK_Unstim	ENSMUST00000083011	Y_RNA.6-201
OCR_64630	chr2	94105425	94105710	-1.26439	1.97764	26.3134	3.26e-06	5.72e-05	Treg_IK_StimVSTreg_IK_Unstim	ENSMUST00000134563	E530001K10Rik-001
OCR_5288	chr1	137271069	137271970	1.22512	2.35232	26.5696	3.27e-06	5.72e-05	Treg_IK_StimVSTreg_IK_Unstim	ENSMUST00000159181	Shisa4-002
OCR_51973	chr17	71193148	71193475	-1.14593	2.23139	26.2874	3.3e-06	5.75e-05	Treg_IK_StimVSTreg_IK_Unstim	ENSMUST00000156484	Tgif1-008
OCR_91376	chr6	13789218	13789742	-1.15938	2.23757	26.2708	3.31e-06	5.78e-05	Treg_IK_StimVSTreg_IK_Unstim	ENSMUST00000127072	Gpr85-004
OCR_69162	chr2	177836598	177837142	-1.0476	3.20564	28.2431	3.34e-06	5.82e-05	Treg_IK_StimVSTreg_IK_Unstim	ENSMUST00000108917	Phactr3-001
OCR_90225	chr5	139959463	139959729	-1.2062	2.03081	26.2379	3.35e-06	5.84e-05	Treg_IK_StimVSTreg_IK_Unstim	ENSMUST00000143889	Zfand2a-004
OCR_35628	chr14	54833430	54833754	-1.09913	2.57642	26.9094	3.39e-06	5.9e-05	Treg_IK_StimVSTreg_IK_Unstim	ENSMUST00000103735	Traj5-201
OCR_89125	chr5	122217382	122217923	1.16881	2.17031	26.161	3.45e-06	5.98e-05	Treg_IK_StimVSTreg_IK_Unstim	ENSMUST00000160821	Atxn2-005
OCR_111683	chr9	14185894	14186064	-1.11132	2.28558	26.1583	3.47e-06	6.01e-05	Treg_IK_StimVSTreg_IK_Unstim	ENSMUST00000163822	Endod1-202
OCR_26134	chr12	104303195	104303800	-1.14294	2.29673	26.0998	3.53e-06	6.08e-05	Treg_IK_StimVSTreg_IK_Unstim	ENSMUST00000085079	Unc79-201
OCR_55750	chr18	60768909	60769778	1.14991	2.29066	26.0398	3.6e-06	6.19e-05	Treg_IK_StimVSTreg_IK_Unstim	ENSMUST00000115318	Synpo-005
OCR_80217	chr4	94665897	94666313	-1.20511	1.9824	26.0289	3.62e-06	6.21e-05	Treg_IK_StimVSTreg_IK_Unstim	ENSMUST00000149367	Gm12694-001
OCR_22846	chr12	29424086	29424822	1.10082	2.27947	26.0268	3.62e-06	6.21e-05	Treg_IK_StimVSTreg_IK_Unstim	ENSMUST00000020954	Ttc15-201
OCR_75517	chr3	143042070	143042592	-1.02883	2.98915	26.284	3.62e-06	6.21e-05	Treg_IK_StimVSTreg_IK_Unstim	ENSMUST00000158226	SNORA4.6-201
OCR_29205	chr13	43594165	43594611	-1.30413	1.62691	25.9267	3.75e-06	6.4e-05	Treg_IK_StimVSTreg_IK_Unstim	ENSMUST00000144326	Ranbp9-202
OCR_38163	chr14	119108997	119109248	-1.00325	2.54004	25.9222	3.76e-06	6.4e-05	Treg_IK_StimVSTreg_IK_Unstim	ENSMUST00000036554	Abcc4-201
OCR_92578	chr6	41146509	41147171	-1.08552	2.24599	25.9075	3.78e-06	6.43e-05	Treg_IK_StimVSTreg_IK_Unstim	ENSMUST00000103278	Trbv21-201
OCR_99061	chr7	19907864	19908036	-1.33211	1.99157	25.9741	3.86e-06	6.54e-05	Treg_IK_StimVSTreg_IK_Unstim	ENSMUST00000003640	Fosb-201
OCR_97545	chr6	137154514	137154866	-1.40443	1.94515	25.8703	3.88e-06	6.57e-05	Treg_IK_StimVSTreg_IK_Unstim	ENSMUST00000032347	Rerg-002
OCR_35590	chr14	54329367	54329617	-1.57721	1.76159	25.8126	3.91e-06	6.61e-05	Treg_IK_StimVSTreg_IK_Unstim	ENSMUST00000103665	Trav6-7-dv9-001
OCR_22677	chr12	26045487	26045752	-1.28766	2.12818	26.4248	4.11e-06	6.89e-05	Treg_IK_StimVSTreg_IK_Unstim	ENSMUST00000020974	Id2-201
OCR_115578	chr9	106014728	106015607	-1.07715	2.35362	25.6678	4.12e-06	6.91e-05	Treg_IK_StimVSTreg_IK_Unstim	ENSMUST00000121963	Col6a4-001
OCR_92028	chr6	31035820	31036127	-1.02099	2.45759	25.6496	4.15e-06	6.94e-05	Treg_IK_StimVSTreg_IK_Unstim	ENSMUST00000123757	Gm13834-001
OCR_3454	chr1	90203190	90203445	1.08429	2.42145	25.6305	4.18e-06	6.98e-05	Treg_IK_StimVSTreg_IK_Unstim	ENSMUST00000040210	Trpm8-002
OCR_33014	chr13	115583393	115583815	-1.19433	2.13908	25.6292	4.18e-06	6.99e-05	Treg_IK_StimVSTreg_IK_Unstim	ENSMUST00000165669	Mocs2-005
OCR_38307	chr14	120722338	120722696	-1.12394	2.01787	25.6081	4.21e-06	7.03e-05	Treg_IK_StimVSTreg_IK_Unstim	ENSMUST00000022738	Mbnl2-201
OCR_109879	chr8	112215605	112215864	-1.03493	2.47205	25.6027	4.22e-06	7.04e-05	Treg_IK_StimVSTreg_IK_Unstim	ENSMUST00000168394	2400003C14Rik-202
OCR_100722	chr7	64438504	64439691	1.05696	2.84229	25.5734	4.27e-06	7.1e-05	Treg_IK_StimVSTreg_IK_Unstim	ENSMUST00000068394	Gabrg3-001
OCR_55339	chr18	53116154	53116637	-1.05622	2.70444	26.0585	4.41e-06	7.3e-05	Treg_IK_StimVSTreg_IK_Unstim	ENSMUST00000163742	Sncaip-203
OCR_60213	chr2	9586214	9586963	1.16302	2.06976	25.4724	4.43e-06	7.31e-05	Treg_IK_StimVSTreg_IK_Unstim	ENSMUST00000128180	Gm13218-001
OCR_8956	chr10	5009703	5010074	-1.44829	1.53946	25.3977	4.55e-06	7.46e-05	Treg_IK_StimVSTreg_IK_Unstim	ENSMUST00000104408	U6.521-201
OCR_10169	chr10	25400990	25401544	-1.04302	2.68527	25.3383	4.65e-06	7.58e-05	Treg_IK_StimVSTreg_IK_Unstim	ENSMUST00000061084	Epb4.1l2-204
OCR_48805	chr17	12468582	12469130	1.04983	2.23446	25.3374	4.65e-06	7.58e-05	Treg_IK_StimVSTreg_IK_Unstim	ENSMUST00000104288	SNORA17.172-201
OCR_97046	chr6	129180430	129180659	1.14431	2.45306	27.1426	4.68e-06	7.62e-05	Treg_IK_StimVSTreg_IK_Unstim	ENSMUST00000131466	2310001H17Rik-201
OCR_2076	chr1	60809861	60810170	1.14013	2.10873	25.2757	4.75e-06	7.71e-05	Treg_IK_StimVSTreg_IK_Unstim	ENSMUST00000153207	Cd28-002
OCR_118598	chrX	165097772	165098066	-1.08118	2.21257	25.2612	4.78e-06	7.74e-05	Treg_IK_StimVSTreg_IK_Unstim	ENSMUST00000145564	Msl3-004
OCR_91545	chr6	17592327	17592615	-1.11229	2.195	25.2516	4.8e-06	7.76e-05	Treg_IK_StimVSTreg_IK_Unstim	ENSMUST00000152005	Capza2-006
OCR_29148	chr13	42208944	42209566	-1.06085	2.51746	25.3794	4.92e-06	7.92e-05	Treg_IK_StimVSTreg_IK_Unstim	ENSMUST00000060148	Hivep1-201
OCR_103670	chr7	124757953	124758247	-1.14996	2.15063	25.1825	4.92e-06	7.92e-05	Treg_IK_StimVSTreg_IK_Unstim	ENSMUST00000161889	Xylt1-003
OCR_43278	chr15	100580172	100580431	-1.07847	2.27503	25.1673	4.95e-06	7.95e-05	Treg_IK_StimVSTreg_IK_Unstim	ENSMUST00000023776	Slc4a8-001
OCR_39862	chr15	36368313	36368894	1.03348	2.43305	25.1107	5.05e-06	8.08e-05	Treg_IK_StimVSTreg_IK_Unstim	ENSMUST00000057486	Ankrd46-201
OCR_113592	chr9	59185751	59186054	-1.19447	1.94205	25.0816	5.1e-06	8.15e-05	Treg_IK_StimVSTreg_IK_Unstim	ENSMUST00000026265	Bbs4-201
OCR_2519	chr1	69713452	69713804	-1.08617	2.28651	24.9937	5.27e-06	8.37e-05	Treg_IK_StimVSTreg_IK_Unstim	ENSMUST00000027146	Ikzf2-201
OCR_11588	chr10	57687917	57688419	1.2958	3.13423	30.793	5.3e-06	8.4e-05	Treg_IK_StimVSTreg_IK_Unstim	ENSMUST00000174056	Dux-001
OCR_111562	chr9	12627624	12628569	1.17766	2.3682	24.9709	5.31e-06	8.42e-05	Treg_IK_StimVSTreg_IK_Unstim	ENSMUST00000158852	5S_rRNA.121-201
OCR_18068	chr11	54578323	54578627	-1.05249	2.28711	24.8378	5.58e-06	8.74e-05	Treg_IK_StimVSTreg_IK_Unstim	ENSMUST00000123424	Cdc42se2-005
OCR_106634	chr8	35078718	35079293	-1.0013	2.62682	24.9676	5.67e-06	8.86e-05	Treg_IK_StimVSTreg_IK_Unstim	ENSMUST00000139529	Gm9951-003
OCR_75237	chr3	137613247	137613426	-1.02624	2.36505	24.7545	5.75e-06	8.97e-05	Treg_IK_StimVSTreg_IK_Unstim	ENSMUST00000124827	Dapp1-004
OCR_99035	chr7	19781575	19782341	1.2009	2.01526	24.7525	5.76e-06	8.97e-05	Treg_IK_StimVSTreg_IK_Unstim	ENSMUST00000146095	Eml2-008
OCR_55820	chr18	61195507	61196254	1.25673	2.17999	24.7271	5.81e-06	9.03e-05	Treg_IK_StimVSTreg_IK_Unstim	ENSMUST00000025521	Cdx1-001
OCR_53456	chr18	5647878	5648554	-1.12026	2.20166	24.7216	5.82e-06	9.05e-05	Treg_IK_StimVSTreg_IK_Unstim	ENSMUST00000116893	AC127028.1-201
OCR_41338	chr15	72987566	72987748	-1.02268	2.57185	24.6451	5.99e-06	9.25e-05	Treg_IK_StimVSTreg_IK_Unstim	ENSMUST00000044113	Eif2c2-001
OCR_15580	chr10	125073357	125074250	-1.0785	2.43946	24.6392	6e-06	9.27e-05	Treg_IK_StimVSTreg_IK_Unstim	ENSMUST00000063318	Slc16a7-201
OCR_36962	chr14	79714268	79714872	-1.11446	2.9055	25.2116	6.05e-06	9.33e-05	Treg_IK_StimVSTreg_IK_Unstim	ENSMUST00000022595	1190002H23Rik-001
OCR_53447	chr18	5607915	5608143	-1.37203	1.56433	24.6056	6.08e-06	9.37e-05	Treg_IK_StimVSTreg_IK_Unstim	ENSMUST00000162143	Gm16147-001
OCR_101407	chr7	80676472	80676722	-1.11165	2.17165	24.6038	6.08e-06	9.37e-05	Treg_IK_StimVSTreg_IK_Unstim	ENSMUST00000172704	Chd2-002
OCR_93611	chr6	64823154	64823743	-1.37471	1.72575	24.6003	6.09e-06	9.38e-05	Treg_IK_StimVSTreg_IK_Unstim	ENSMUST00000137642	Gm15534-001
OCR_114752	chr9	86518375	86518918	-1.05801	2.5738	24.5998	6.09e-06	9.38e-05	Treg_IK_StimVSTreg_IK_Unstim	ENSMUST00000034988	Rwdd2a-201
OCR_51202	chr17	53770581	53771182	1.04884	2.20012	24.574	6.15e-06	9.45e-05	Treg_IK_StimVSTreg_IK_Unstim	ENSMUST00000166525	Kat2b-004
OCR_108263	chr8	78591698	78592103	-1.30163	1.60645	24.5633	6.17e-06	9.48e-05	Treg_IK_StimVSTreg_IK_Unstim	ENSMUST00000104349	SNORA17.197-201
OCR_110801	chr8	125484713	125485351	-1.05126	2.50918	24.5274	6.25e-06	9.58e-05	Treg_IK_StimVSTreg_IK_Unstim	ENSMUST00000174833	Ankrd11-003
OCR_26168	chr12	104769814	104770028	-1.09656	2.57652	25.1305	6.35e-06	9.68e-05	Treg_IK_StimVSTreg_IK_Unstim	ENSMUST00000171281	Ppp4r4-202
OCR_21708	chr11	120206406	120206632	-1.3883	1.75897	24.4627	6.41e-06	9.75e-05	Treg_IK_StimVSTreg_IK_Unstim	ENSMUST00000175523	AL669855.1-201
OCR_34650	chr14	31369777	31370229	1.07011	2.1931	24.4592	6.41e-06	9.76e-05	Treg_IK_StimVSTreg_IK_Unstim	ENSMUST00000162356	Tkt-003
OCR_39182	chr15	15672794	15673389	-1.27019	1.89154	24.4329	6.48e-06	9.84e-05	Treg_IK_StimVSTreg_IK_Unstim	ENSMUST00000158079	SNORA17.461-201
OCR_14929	chr10	116360722	116361023	-1.21224	2.26852	24.5014	6.56e-06	9.95e-05	Treg_IK_StimVSTreg_IK_Unstim	ENSMUST00000166934	Rab3ip-202
OCR_28797	chr13	34023441	34023993	1.15039	2.05199	24.4501	6.57e-06	9.95e-05	Treg_IK_StimVSTreg_IK_Unstim	ENSMUST00000147622	1110046J04Rik-001
OCR_74783	chr3	130582154	130582744	1.12044	2.31139	24.3948	6.57e-06	9.96e-05	Treg_IK_StimVSTreg_IK_Unstim	ENSMUST00000157897	SNORA61.11-201
OCR_38416	chr14	121754747	121754905	-1.14322	2.28686	24.4502	6.6e-06	9.98e-05	Treg_IK_StimVSTreg_IK_Unstim	ENSMUST00000079817	Stk24-201
OCR_16484	chr11	11619403	11619662	-1.07007	2.07475	24.3583	6.66e-06	0.0001005	Treg_IK_StimVSTreg_IK_Unstim	ENSMUST00000168214	Ikzf1-207
OCR_52398	chr17	78647974	78648290	-1.23536	2.31509	25.8685	6.72e-06	0.000101222	Treg_IK_StimVSTreg_IK_Unstim	ENSMUST00000112498	Crim1-201
OCR_24643	chr12	74814617	74814791	-1.07339	2.37833	24.3233	6.74e-06	0.000101446	Treg_IK_StimVSTreg_IK_Unstim	ENSMUST00000119092	Prkch-002
OCR_27152	chr12	118641921	118642594	-1.02896	2.79251	24.7288	6.8e-06	0.000102105	Treg_IK_StimVSTreg_IK_Unstim	ENSMUST00000109691	Rapgef5-201
OCR_54656	chr18	36961894	36962151	-1.15505	2.10922	24.2019	7.05e-06	0.00010535	Treg_IK_StimVSTreg_IK_Unstim	ENSMUST00000083211	Vault.2-201
OCR_20524	chr11	101506470	101507157	-1.0116	2.42587	24.1904	7.08e-06	0.000105722	Treg_IK_StimVSTreg_IK_Unstim	ENSMUST00000083317	U2.14-201
OCR_28832	chr13	34965768	34965951	-1.2954	2.54783	28.9333	7.09e-06	0.000105776	Treg_IK_StimVSTreg_IK_Unstim	ENSMUST00000021850	Prpf4b-201
OCR_72771	chr3	88185728	88186206	-1.00438	2.35619	24.1617	7.16e-06	0.000106585	Treg_IK_StimVSTreg_IK_Unstim	ENSMUST00000107540	Gm6821-201
OCR_91607	chr6	18765515	18765973	1.09147	2.56803	26.0776	7.22e-06	0.000107303	Treg_IK_StimVSTreg_IK_Unstim	ENSMUST00000096101	Gm5874-201
OCR_18266	chr11	58774268	58774489	-1.15718	1.8376	24.1354	7.23e-06	0.000107361	Treg_IK_StimVSTreg_IK_Unstim	ENSMUST00000122447	Gm12260-001
OCR_72001	chr3	68588501	68588719	-1.02998	2.7043	24.6179	7.24e-06	0.000107395	Treg_IK_StimVSTreg_IK_Unstim	ENSMUST00000080726	Gm10040-201
OCR_83211	chr4	145676285	145677158	1.13399	3.15905	27.3166	7.29e-06	0.000108026	Treg_IK_StimVSTreg_IK_Unstim	ENSMUST00000140089	Gm13247-002
OCR_32802	chr13	112594880	112595083	-1.04846	2.41847	24.0858	7.36e-06	0.00010891	Treg_IK_StimVSTreg_IK_Unstim	ENSMUST00000145055	Map3k1-002
OCR_79382	chr4	68615113	68615815	1.18938	2.1666	24.053	7.45e-06	0.000110134	Treg_IK_StimVSTreg_IK_Unstim	ENSMUST00000030036	Dbc1-001
OCR_47813	chr16	92498760	92499513	1.29173	2.10209	24.2531	7.52e-06	0.000110908	Treg_IK_StimVSTreg_IK_Unstim	ENSMUST00000023670	Clic6-001
OCR_3424	chr1	90130467	90130729	1.00872	3.0366	24.4341	7.59e-06	0.000111796	Treg_IK_StimVSTreg_IK_Unstim	ENSMUST00000142632	Heatr7b1-004
OCR_47022	chr16	76002547	76002992	-1.03256	2.32477	23.9101	7.86e-06	0.000115015	Treg_IK_StimVSTreg_IK_Unstim	ENSMUST00000128832	Gm15555-001
OCR_89328	chr5	124473241	124473690	-1.18265	2.35224	24.0802	7.88e-06	0.000115209	Treg_IK_StimVSTreg_IK_Unstim	ENSMUST00000040967	Vps37b-201
OCR_61280	chr2	28951145	28951556	-1.05662	2.5792	23.953	7.9e-06	0.000115347	Treg_IK_StimVSTreg_IK_Unstim	ENSMUST00000120617	Gm13396-001
OCR_92030	chr6	31039402	31039614	-1.27237	1.64172	23.85	8.04e-06	0.000116884	Treg_IK_StimVSTreg_IK_Unstim	ENSMUST00000123757	Gm13834-001
OCR_81816	chr4	124794879	124795101	-1.10548	2.04593	23.8224	8.12e-06	0.000117835	Treg_IK_StimVSTreg_IK_Unstim	ENSMUST00000131685	Zc3h12a-002
OCR_2407	chr1	66908796	66908990	-1.01524	2.31364	23.8128	8.15e-06	0.000118113	Treg_IK_StimVSTreg_IK_Unstim	ENSMUST00000027153	Acadl-001
OCR_7796	chr1	182244843	182245113	-1.14059	2.085	23.8111	8.15e-06	0.000118158	Treg_IK_StimVSTreg_IK_Unstim	ENSMUST00000097449	Itpkb-201
OCR_67468	chr2	150826316	150826838	-1.15943	2.27144	24.0426	8.18e-06	0.000118422	Treg_IK_StimVSTreg_IK_Unstim	ENSMUST00000128564	Ninl-003
OCR_83181	chr4	144895875	144896245	-1.10466	1.95134	23.7354	8.39e-06	0.00012062	Treg_IK_StimVSTreg_IK_Unstim	ENSMUST00000030339	Tnfrsf8-001
OCR_77797	chr4	32480191	32480582	-1.00844	2.68359	23.6962	8.51e-06	0.000122099	Treg_IK_StimVSTreg_IK_Unstim	ENSMUST00000108179	Bach2-202
OCR_100435	chr7	54152898	54153456	1.07687	2.10712	23.6867	8.54e-06	0.000122434	Treg_IK_StimVSTreg_IK_Unstim	ENSMUST00000146130	Tsg101-005
OCR_103065	chr7	114669769	114670316	-1.24133	2.21872	23.6779	8.57e-06	0.000122695	Treg_IK_StimVSTreg_IK_Unstim	ENSMUST00000127444	Syt9-005
OCR_58712	chr19	33441190	33441478	-1.04478	2.31063	23.6718	8.59e-06	0.000122857	Treg_IK_StimVSTreg_IK_Unstim	ENSMUST00000096114	Rnls-001
OCR_20721	chr11	104629449	104629686	-1.34594	1.54087	23.6677	8.6e-06	0.000122956	Treg_IK_StimVSTreg_IK_Unstim	ENSMUST00000120176	Gm11623-001
OCR_65502	chr2	115889826	115890027	-1.10858	2.23319	23.6541	8.64e-06	0.000123401	Treg_IK_StimVSTreg_IK_Unstim	ENSMUST00000133990	Meis2-007
OCR_15893	chr10	128957049	128957992	1.1284	2.39258	23.608	8.79e-06	0.000125	Treg_IK_StimVSTreg_IK_Unstim	ENSMUST00000057477	Olfr791-201
OCR_114010	chr9	68804267	68804695	-1.34468	1.86306	24.4439	8.86e-06	0.00012587	Treg_IK_StimVSTreg_IK_Unstim	ENSMUST00000169267	F830001A07Rik-201
OCR_88741	chr5	115636679	115637046	-1.0965	2.15042	23.5762	8.9e-06	0.000126297	Treg_IK_StimVSTreg_IK_Unstim	ENSMUST00000031519	Cabp1-001
OCR_91151	chr6	6810204	6810697	-1.00636	2.41957	23.5072	9.13e-06	0.000128925	Treg_IK_StimVSTreg_IK_Unstim	ENSMUST00000159827	Dlx6as1-002
OCR_68734	chr2	169581603	169582281	-1.03541	2.35519	23.4987	9.16e-06	0.000129303	Treg_IK_StimVSTreg_IK_Unstim	ENSMUST00000109157	Tshz2-002
OCR_116765	chrX	6885284	6885780	1.07914	1.90421	23.4953	9.17e-06	0.000129438	Treg_IK_StimVSTreg_IK_Unstim	ENSMUST00000132126	Clcn5-005
OCR_34115	chr14	21956193	21956473	-1.20815	1.87391	23.4854	9.21e-06	0.000129793	Treg_IK_StimVSTreg_IK_Unstim	ENSMUST00000045376	Adk-201
OCR_30128	chr13	62571389	62571616	-1.02608	2.50235	23.4185	9.44e-06	0.000132763	Treg_IK_StimVSTreg_IK_Unstim	ENSMUST00000102291	AC122357.1-201
OCR_111001	chr8	128095088	128095255	-1.19102	1.82545	23.3888	9.54e-06	0.000133929	Treg_IK_StimVSTreg_IK_Unstim	ENSMUST00000047850	Sipa1l2-201
OCR_16252	chr11	6564504	6564890	-1.38833	1.66176	23.3612	9.64e-06	0.000135193	Treg_IK_StimVSTreg_IK_Unstim	ENSMUST00000127510	Gm11978-004
OCR_4819	chr1	129576470	129576711	-1.08985	1.97663	23.3514	9.68e-06	0.000135558	Treg_IK_StimVSTreg_IK_Unstim	ENSMUST00000027585	Tmem163-004
OCR_97927	chr6	143123341	143123561	-1.1894	1.76143	23.3292	9.76e-06	0.000136563	Treg_IK_StimVSTreg_IK_Unstim	ENSMUST00000032413	Etnk1-201
OCR_56587	chr18	75483464	75483883	-1.17722	2.20579	23.2896	9.91e-06	0.000138111	Treg_IK_StimVSTreg_IK_Unstim	ENSMUST00000174338	Gm20544-001
OCR_112397	chr9	32403956	32404210	-1.07289	2.38047	23.4739	9.94e-06	0.000138536	Treg_IK_StimVSTreg_IK_Unstim	ENSMUST00000058892	Ets1-203
OCR_16623	chr11	17116539	17116784	1.18844	1.81706	23.33	9.98e-06	0.000138928	Treg_IK_StimVSTreg_IK_Unstim	ENSMUST00000165160	Wdr92-201
OCR_56021	chr18	64499468	64499736	-1.2609	1.6532	23.2698	9.98e-06	0.000138928	Treg_IK_StimVSTreg_IK_Unstim	ENSMUST00000175965	Onecut2-001
OCR_111271	chr8	131176678	131177072	-1.19101	1.85136	23.2493	1.01e-05	0.000139753	Treg_IK_StimVSTreg_IK_Unstim	ENSMUST00000101915	U6.471-201
OCR_81703	chr4	122762369	122762866	-1.30106	1.52183	23.2388	1.01e-05	0.000140008	Treg_IK_StimVSTreg_IK_Unstim	ENSMUST00000127060	Gm12923-001
OCR_71500	chr3	55298356	55298578	-1.239	1.85376	23.2256	1.01e-05	0.000140636	Treg_IK_StimVSTreg_IK_Unstim	ENSMUST00000070418	Dclk1-202
OCR_118257	chrX	147552025	147552285	-1.19628	1.77909	23.1728	1.03e-05	0.000142915	Treg_IK_StimVSTreg_IK_Unstim	ENSMUST00000112683	Tsr2-001
OCR_51085	chr17	51939588	51939907	-1.38982	1.76329	23.1639	1.04e-05	0.000143259	Treg_IK_StimVSTreg_IK_Unstim	ENSMUST00000140727	Satb1-013
OCR_59912	chr2	3701055	3701635	-1.0123	2.42205	23.1342	1.05e-05	0.000144428	Treg_IK_StimVSTreg_IK_Unstim	ENSMUST00000176254	Fam107b-005
OCR_57933	chr19	9911445	9911776	-1.10355	2.12816	23.0157	1.1e-05	0.000150133	Treg_IK_StimVSTreg_IK_Unstim	ENSMUST00000102415	AC132253.1-201
OCR_76887	chr4	7161790	7162421	-1.09989	2.4588	23.2244	1.1e-05	0.000150365	Treg_IK_StimVSTreg_IK_Unstim	ENSMUST00000121663	Gm11804-001
OCR_105039	chr7	147482053	147482909	1.24676	2.15676	23.3375	1.1e-05	0.000150793	Treg_IK_StimVSTreg_IK_Unstim	ENSMUST00000078103	Olfr525-201
OCR_74607	chr3	127025706	127026117	-1.1508	2.02823	22.8758	1.16e-05	0.000156515	Treg_IK_StimVSTreg_IK_Unstim	ENSMUST00000171354	Ank2-209
OCR_113016	chr9	45823045	45823458	-1.01234	2.37871	22.8612	1.16e-05	0.000157121	Treg_IK_StimVSTreg_IK_Unstim	ENSMUST00000120247	Sik3-004
OCR_92032	chr6	31055218	31055514	-1.20986	1.78355	22.8168	1.18e-05	0.000159198	Treg_IK_StimVSTreg_IK_Unstim	ENSMUST00000146766	Gm13833-001
OCR_47987	chr16	94825996	94826275	-1.11111	2.18802	22.8011	1.19e-05	0.000159853	Treg_IK_StimVSTreg_IK_Unstim	ENSMUST00000119372	Gm15971-001
OCR_1570	chr1	51019197	51019496	-1.27217	1.81056	22.773	1.2e-05	0.000161337	Treg_IK_StimVSTreg_IK_Unstim	ENSMUST00000114567	Tmeff2-201
OCR_65962	chr2	124947865	124948269	-1.0013	2.44114	22.7368	1.22e-05	0.00016315	Treg_IK_StimVSTreg_IK_Unstim	ENSMUST00000137091	Myef2-004
OCR_50337	chr17	35863908	35864480	1.17653	2.02575	22.7227	1.23e-05	0.000163842	Treg_IK_StimVSTreg_IK_Unstim	ENSMUST00000173840	Gm20443-001
OCR_73332	chr3	96742681	96743002	-1.0749	2.17909	22.7047	1.23e-05	0.000164842	Treg_IK_StimVSTreg_IK_Unstim	ENSMUST00000062944	Gja8-201
OCR_118178	chrX	137198006	137198430	-1.03283	2.27516	22.6874	1.24e-05	0.000165771	Treg_IK_StimVSTreg_IK_Unstim	ENSMUST00000128809	Mid2-006
OCR_63314	chr2	68582708	68583004	-1.27725	1.7612	22.847	1.25e-05	0.000166536	Treg_IK_StimVSTreg_IK_Unstim	ENSMUST00000135023	4932414N04Rik-004
OCR_17694	chr11	48740214	48741005	1.02726	2.18438	22.6513	1.26e-05	0.000167668	Treg_IK_StimVSTreg_IK_Unstim	ENSMUST00000094476	Gm12185-001
OCR_59687	chr19	58086284	58086755	-1.38382	1.54658	22.6352	1.29e-05	0.000171321	Treg_IK_StimVSTreg_IK_Unstim	ENSMUST00000176631	AC140469.1-201
OCR_29713	chr13	52914195	52914517	1.06356	1.94396	22.5048	1.33e-05	0.000175994	Treg_IK_StimVSTreg_IK_Unstim	ENSMUST00000137064	Auh-006
OCR_78301	chr4	45119223	45119503	-1.1733	1.75228	22.4857	1.34e-05	0.000176957	Treg_IK_StimVSTreg_IK_Unstim	ENSMUST00000107809	Tomm5-002
OCR_46459	chr16	57391246	57391857	1.1117	5.80349	42.5423	1.35e-05	0.000178161	Treg_IK_StimVSTreg_IK_Unstim	ENSMUST00000099667	Filip1l-002
OCR_10689	chr10	38725817	38726271	-1.03433	2.22519	22.4531	1.36e-05	0.000178483	Treg_IK_StimVSTreg_IK_Unstim	ENSMUST00000159580	Lama4-005
OCR_52255	chr17	74754160	74754638	1.08014	2.0974	22.4423	1.36e-05	0.000179013	Treg_IK_StimVSTreg_IK_Unstim	ENSMUST00000024869	Spast-201
OCR_76864	chr4	6896059	6896291	-1.09847	1.89014	22.332	1.42e-05	0.000185103	Treg_IK_StimVSTreg_IK_Unstim	ENSMUST00000150082	Tox-004
OCR_117450	chrX	70738983	70739237	-1.17582	1.59411	22.2878	1.45e-05	0.000187615	Treg_IK_StimVSTreg_IK_Unstim	ENSMUST00000155231	Bgn-006
OCR_24593	chr12	74681878	74682158	-1.09507	2.22299	22.236	1.47e-05	0.000190758	Treg_IK_StimVSTreg_IK_Unstim	ENSMUST00000164444	Prkch-201
OCR_98810	chr7	16573928	16574723	1.23338	1.98823	22.2407	1.48e-05	0.000190776	Treg_IK_StimVSTreg_IK_Unstim	ENSMUST00000094821	Gltscr1-201
OCR_99160	chr7	24889447	24890247	1.27311	2.30985	22.9005	1.48e-05	0.000190776	Treg_IK_StimVSTreg_IK_Unstim	ENSMUST00000120006	Zfp112-002
OCR_96090	chr6	115753539	115753840	-1.01218	2.44687	22.2162	1.49e-05	0.000191824	Treg_IK_StimVSTreg_IK_Unstim	ENSMUST00000082629	Snora7a-201
OCR_43436	chr15	102592281	102592725	-1.06928	2.11628	22.1939	1.5e-05	0.000193122	Treg_IK_StimVSTreg_IK_Unstim	ENSMUST00000023818	Calcoco1-001
OCR_3035	chr1	80599628	80600035	1.06889	1.88249	22.1537	1.52e-05	0.00019537	Treg_IK_StimVSTreg_IK_Unstim	ENSMUST00000057520	Dock10-201
OCR_47731	chr16	91466127	91466388	-1.02817	2.22438	22.1497	1.52e-05	0.000195564	Treg_IK_StimVSTreg_IK_Unstim	ENSMUST00000149172	A930006K02Rik-001
OCR_27435	chr13	6158632	6159279	-1.00154	2.21677	22.1448	1.53e-05	0.000195861	Treg_IK_StimVSTreg_IK_Unstim	ENSMUST00000104778	AC154816.1-201
OCR_4237	chr1	108714957	108715476	-1.02516	2.31387	22.1354	1.53e-05	0.000196481	Treg_IK_StimVSTreg_IK_Unstim	ENSMUST00000094646	Vps4b-001
OCR_95311	chr6	99290251	99290615	-1.11424	2.05749	22.2194	1.58e-05	0.000201359	Treg_IK_StimVSTreg_IK_Unstim	ENSMUST00000177278	RP23-333F8.1-001
OCR_4773	chr1	129108878	129109166	-1.04645	2.10552	22.0435	1.59e-05	0.000202092	Treg_IK_StimVSTreg_IK_Unstim	ENSMUST00000038361	Mgat5-201
OCR_83239	chr4	145753115	145754002	1.27361	2.55003	24.3864	1.59e-05	0.000202099	Treg_IK_StimVSTreg_IK_Unstim	ENSMUST00000105733	Gm13251-001
OCR_23163	chr12	34136652	34137515	1.14746	2.20935	22.0118	1.61e-05	0.000204005	Treg_IK_StimVSTreg_IK_Unstim	ENSMUST00000104562	SNORA17.302-201
OCR_2240	chr1	62769107	62769502	-1.15563	2.19208	21.9289	1.66e-05	0.00020966	Treg_IK_StimVSTreg_IK_Unstim	ENSMUST00000027112	Nrp2-005
OCR_33756	chr14	16579770	16579999	-1.12175	2.11788	21.9031	1.67e-05	0.000211329	Treg_IK_StimVSTreg_IK_Unstim	ENSMUST00000055211	Lrrc3b-201
OCR_33210	chr13	120282526	120282712	1.13078	2.32325	21.9013	1.67e-05	0.000211428	Treg_IK_StimVSTreg_IK_Unstim	ENSMUST00000099147	Gm7120-201
OCR_100482	chr7	55387616	55388044	-1.31466	1.98135	22.1496	1.68e-05	0.000211712	Treg_IK_StimVSTreg_IK_Unstim	ENSMUST00000094389	Mrgprb5-201
OCR_97568	chr6	137672304	137672897	-1.02783	2.51676	21.9933	1.69e-05	0.000212778	Treg_IK_StimVSTreg_IK_Unstim	ENSMUST00000064910	Strap-001
OCR_62518	chr2	51292150	51292435	-1.15931	2.40284	22.2538	1.7e-05	0.000214087	Treg_IK_StimVSTreg_IK_Unstim	ENSMUST00000154530	1700057H21Rik-001
OCR_56060	chr18	65173210	65173444	-1.04947	2.09845	21.7633	1.76e-05	0.000220804	Treg_IK_StimVSTreg_IK_Unstim	ENSMUST00000163809	Nedd4l-205
OCR_102660	chr7	106189950	106190212	-1.14765	1.7308	21.7563	1.77e-05	0.000221169	Treg_IK_StimVSTreg_IK_Unstim	ENSMUST00000037968	Uvrag-201
OCR_55548	chr18	56666995	56667454	-1.17673	2.37465	22.8755	1.79e-05	0.000222845	Treg_IK_StimVSTreg_IK_Unstim	ENSMUST00000172902	Aldh7a1-009
OCR_103683	chr7	125183400	125184035	-1.09633	1.98736	21.6916	1.81e-05	0.000225518	Treg_IK_StimVSTreg_IK_Unstim	ENSMUST00000134270	Rps15a-006
OCR_66133	chr2	128121457	128121776	1.09481	2.17035	21.6863	1.82e-05	0.000225855	Treg_IK_StimVSTreg_IK_Unstim	ENSMUST00000136025	Gm14012-001
OCR_41980	chr15	80390023	80390390	-1.13848	2.00361	21.6709	1.83e-05	0.000226983	Treg_IK_StimVSTreg_IK_Unstim	ENSMUST00000096347	Enthd1-201
OCR_87224	chr5	88937457	88938163	1.0339	2.2505	21.6167	1.87e-05	0.000231024	Treg_IK_StimVSTreg_IK_Unstim	ENSMUST00000164073	Igj-002
OCR_19479	chr11	83222860	83223715	1.06557	2.33889	21.6211	1.87e-05	0.000231693	Treg_IK_StimVSTreg_IK_Unstim	ENSMUST00000175848	Rasl10b-004
OCR_80446	chr4	98849447	98849847	-1.2719	1.80606	21.5687	1.9e-05	0.000234286	Treg_IK_StimVSTreg_IK_Unstim	ENSMUST00000030279	Atg4c-001
OCR_74749	chr3	129778765	129778994	-1.35646	1.29274	21.4578	1.98e-05	0.000242423	Treg_IK_StimVSTreg_IK_Unstim	ENSMUST00000163145	Gm9396-201
OCR_52549	chr17	80620658	80620975	-1.03651	2.04413	21.4259	2.01e-05	0.00024494	Treg_IK_StimVSTreg_IK_Unstim	ENSMUST00000156869	Gemin6-002
OCR_12987	chr10	80632417	80632717	-1.10445	2.28345	21.4614	2.02e-05	0.000246333	Treg_IK_StimVSTreg_IK_Unstim	ENSMUST00000005064	Pias4-001
OCR_89680	chr5	131329273	131329578	-1.14892	2.2826	21.4894	2.03e-05	0.000246799	Treg_IK_StimVSTreg_IK_Unstim	ENSMUST00000158347	U6.818-201
OCR_6459	chr1	158923290	158923580	-1.09324	1.84373	21.373	2.05e-05	0.00024915	Treg_IK_StimVSTreg_IK_Unstim	ENSMUST00000027886	Ralgps2-201
OCR_2201	chr1	62013652	62014225	-1.10323	2.32809	21.278	2.13e-05	0.000256273	Treg_IK_StimVSTreg_IK_Unstim	ENSMUST00000130699	4930448K12Rik-002
OCR_58286	chr19	20419358	20419769	-1.02729	2.45518	21.2719	2.13e-05	0.000256823	Treg_IK_StimVSTreg_IK_Unstim	ENSMUST00000163902	Anxa1-004
OCR_85211	chr5	32011366	32012104	1.05294	2.3008	21.2636	2.14e-05	0.000257454	Treg_IK_StimVSTreg_IK_Unstim	ENSMUST00000078891	Bre-201
OCR_44634	chr16	22526153	22526892	-1.01103	2.42465	21.2524	2.15e-05	0.00025829	Treg_IK_StimVSTreg_IK_Unstim	ENSMUST00000159309	9230117E06Rik-001
OCR_88021	chr5	105774222	105774870	1.04111	1.98817	21.2045	2.19e-05	0.000262459	Treg_IK_StimVSTreg_IK_Unstim	ENSMUST00000171587	Gbp11-201
OCR_1087	chr1	37360455	37360714	-1.02819	2.19815	21.1426	2.24e-05	0.00026761	Treg_IK_StimVSTreg_IK_Unstim	ENSMUST00000140264	Inpp4a-002
OCR_32669	chr13	110526587	110526835	-1.17243	1.45703	21.1319	2.25e-05	0.000268448	Treg_IK_StimVSTreg_IK_Unstim	ENSMUST00000152630	Pde4d-016
OCR_10720	chr10	39106755	39107269	-1.09136	1.83216	21.0339	2.34e-05	0.000277012	Treg_IK_StimVSTreg_IK_Unstim	ENSMUST00000126486	Fyn-003
OCR_60305	chr2	11064405	11064951	1.01935	2.16644	20.9939	2.37e-05	0.000280204	Treg_IK_StimVSTreg_IK_Unstim	ENSMUST00000114853	Prkcq-003
OCR_118629	chrX	166433923	166434137	-1.76895	1.99406	25.3411	2.4e-05	0.000282801	Treg_IK_StimVSTreg_IK_Unstim	ENSMUST00000124513	Gm15247-001
OCR_86404	chr5	64910010	64910638	-1.13361	2.25753	20.917	2.44e-05	0.000287409	Treg_IK_StimVSTreg_IK_Unstim	ENSMUST00000175288	AC122043.1-201
OCR_40225	chr15	44584953	44585478	-1.00014	2.43942	20.9452	2.46e-05	0.000288966	Treg_IK_StimVSTreg_IK_Unstim	ENSMUST00000110267	Sybu-203
OCR_24630	chr12	74774240	74774560	-1.03409	1.93904	20.8935	2.47e-05	0.000289582	Treg_IK_StimVSTreg_IK_Unstim	ENSMUST00000119092	Prkch-002
OCR_85274	chr5	33110147	33110445	-1.11339	1.9722	20.8531	2.51e-05	0.000293111	Treg_IK_StimVSTreg_IK_Unstim	ENSMUST00000138360	Pisd-006
OCR_18280	chr11	59025855	59026157	-1.00994	2.23748	20.8413	2.52e-05	0.000294066	Treg_IK_StimVSTreg_IK_Unstim	ENSMUST00000101158	Gm10434-201
OCR_66360	chr2	131936491	131936841	-1.05132	2.13498	20.8226	2.53e-05	0.000295801	Treg_IK_StimVSTreg_IK_Unstim	ENSMUST00000128899	Slc23a2-003
OCR_117696	chrX	95671606	95672196	-1.06617	2.24124	20.8011	2.58e-05	0.000299708	Treg_IK_StimVSTreg_IK_Unstim	ENSMUST00000117070	Gm14811-001
OCR_38772	chr15	6442323	6442808	1.0475	2.07038	20.8132	2.67e-05	0.000308385	Treg_IK_StimVSTreg_IK_Unstim	ENSMUST00000147905	C9-004
OCR_103109	chr7	115958405	115958787	-1.21765	1.70407	20.6671	2.69e-05	0.000310616	Treg_IK_StimVSTreg_IK_Unstim	ENSMUST00000084754	Olfr514-201
OCR_47623	chr16	89906058	89906901	-1.04172	2.33284	20.6088	2.75e-05	0.00031644	Treg_IK_StimVSTreg_IK_Unstim	ENSMUST00000175038	AC122218.1-201
OCR_53449	chr18	5620946	5621261	-1.00285	2.14964	20.6013	2.76e-05	0.00031703	Treg_IK_StimVSTreg_IK_Unstim	ENSMUST00000116893	AC127028.1-201
OCR_54642	chr18	36847373	36847917	1.12383	1.78049	20.601	2.76e-05	0.00031703	Treg_IK_StimVSTreg_IK_Unstim	ENSMUST00000052890	E230025N22Rik-201
OCR_47841	chr16	92787409	92787646	-1.04994	1.93504	20.5961	2.77e-05	0.000317323	Treg_IK_StimVSTreg_IK_Unstim	ENSMUST00000113957	Runx1-204
OCR_86250	chr5	59068973	59069671	1.04761	2.08624	20.5822	2.78e-05	0.000318858	Treg_IK_StimVSTreg_IK_Unstim	ENSMUST00000158171	SNORA17.480-201
OCR_24865	chr12	79062661	79063563	1.04352	2.32433	20.5676	2.8e-05	0.000320241	Treg_IK_StimVSTreg_IK_Unstim	ENSMUST00000104519	SNORA17.283-201
OCR_26586	chr12	111494750	111495311	1.06102	2.07774	20.3925	3e-05	0.000338917	Treg_IK_StimVSTreg_IK_Unstim	ENSMUST00000165108	Dio3os-201
OCR_36403	chr14	69980730	69981299	1.0698	1.71229	20.3415	3.06e-05	0.000344605	Treg_IK_StimVSTreg_IK_Unstim	ENSMUST00000064846	Entpd4-202
OCR_117596	chrX	90842339	90842838	1.06496	1.86448	20.314	3.09e-05	0.000347404	Treg_IK_StimVSTreg_IK_Unstim	ENSMUST00000157820	SCARNA24.1-201
OCR_22576	chr12	21376265	21376467	-1.06355	1.93107	20.2979	3.11e-05	0.000349323	Treg_IK_StimVSTreg_IK_Unstim	ENSMUST00000175404	AC140457.1-201
OCR_66688	chr2	138293895	138294542	1.18369	2.03502	20.2871	3.12e-05	0.000350401	Treg_IK_StimVSTreg_IK_Unstim	ENSMUST00000117747	Gm14060-001
OCR_95290	chr6	99199494	99200043	-1.00199	2.29939	20.284	3.13e-05	0.000350694	Treg_IK_StimVSTreg_IK_Unstim	ENSMUST00000177208	Foxp1-030
OCR_100548	chr7	56681304	56681736	-1.08282	2.09716	20.275	3.14e-05	0.000351603	Treg_IK_StimVSTreg_IK_Unstim	ENSMUST00000064383	Nav2-202
OCR_18263	chr11	58766974	58767189	-1.02636	2.01351	20.2641	3.15e-05	0.000352774	Treg_IK_StimVSTreg_IK_Unstim	ENSMUST00000117558	Hist3h2bb-ps-001
OCR_5317	chr1	137684437	137684851	-1.0337	2.00765	20.1932	3.24e-05	0.000361108	Treg_IK_StimVSTreg_IK_Unstim	ENSMUST00000132795	Tnni1-005
OCR_114457	chr9	78548560	78548805	-1.17284	1.54997	20.1834	3.25e-05	0.000362355	Treg_IK_StimVSTreg_IK_Unstim	ENSMUST00000171278	4921509A06Rik-001
OCR_115629	chr9	106559000	106559664	1.29954	1.95148	21.5688	3.29e-05	0.000365535	Treg_IK_StimVSTreg_IK_Unstim	ENSMUST00000023959	Grm2-201
OCR_52950	chr17	86699025	86699197	-1.12279	2.03859	20.1499	3.29e-05	0.000366313	Treg_IK_StimVSTreg_IK_Unstim	ENSMUST00000097274	Prkce-003
OCR_87487	chr5	93483152	93483700	-1.04952	2.06964	20.0775	3.39e-05	0.00037478	Treg_IK_StimVSTreg_IK_Unstim	ENSMUST00000061328	Sowahb-201
OCR_39356	chr15	25777599	25777817	-1.09276	2.46374	21.582	3.43e-05	0.000378104	Treg_IK_StimVSTreg_IK_Unstim	ENSMUST00000022881	Fam134b-201
OCR_106737	chr8	35886479	35886842	-1.08019	1.98219	20.0392	3.44e-05	0.000379483	Treg_IK_StimVSTreg_IK_Unstim	ENSMUST00000033930	Dusp4-001
OCR_76856	chr4	6872588	6872844	-1.07935	1.69248	20.0239	3.46e-05	0.000381196	Treg_IK_StimVSTreg_IK_Unstim	ENSMUST00000150082	Tox-004
OCR_87943	chr5	104208886	104209242	-1.12284	1.5575	20.0037	3.49e-05	0.00038376	Treg_IK_StimVSTreg_IK_Unstim	ENSMUST00000152145	Aff1-004
OCR_47936	chr16	94080161	94080552	-1.05573	1.6967	19.9986	3.5e-05	0.000384289	Treg_IK_StimVSTreg_IK_Unstim	ENSMUST00000072182	Sim2-201
OCR_61948	chr2	38429925	38430674	1.03055	2.31407	20.0845	3.51e-05	0.000385456	Treg_IK_StimVSTreg_IK_Unstim	ENSMUST00000121784	Gm13586-001
OCR_72619	chr3	85727902	85728402	-1.01158	2.25636	19.9326	3.59e-05	0.000392118	Treg_IK_StimVSTreg_IK_Unstim	ENSMUST00000054148	Gm9790-201
OCR_118591	chrX	163935713	163936064	-1.01141	2.46176	19.9691	3.64e-05	0.000396641	Treg_IK_StimVSTreg_IK_Unstim	ENSMUST00000119303	Gm6744-001
OCR_19781	chr11	88829101	88830824	1.08518	4.32561	29.1277	3.69e-05	0.000401365	Treg_IK_StimVSTreg_IK_Unstim	ENSMUST00000135325	Coil-003
OCR_107890	chr8	71725975	71726276	-1.0174	1.88481	19.8339	3.73e-05	0.00040425	Treg_IK_StimVSTreg_IK_Unstim	ENSMUST00000172413	Gm7677-201
OCR_67559	chr2	152504094	152504426	-1.00824	1.99309	19.7729	3.82e-05	0.000411668	Treg_IK_StimVSTreg_IK_Unstim	ENSMUST00000062148	Mcts2-001
OCR_118340	chrX	155363069	155363303	-1.29676	1.36841	19.7517	3.85e-05	0.000414586	Treg_IK_StimVSTreg_IK_Unstim	ENSMUST00000118817	Gm5764-001
OCR_18227	chr11	58006938	58007333	1.03994	1.9207	19.9173	3.94e-05	0.000423067	Treg_IK_StimVSTreg_IK_Unstim	ENSMUST00000119467	Gm12250-001
OCR_23703	chr12	46210497	46211345	1.08172	2.41067	19.876	3.96e-05	0.000424913	Treg_IK_StimVSTreg_IK_Unstim	ENSMUST00000158227	SNORA17.489-201
OCR_97622	chr6	138740823	138741496	1.04486	2.11885	19.6225	4.05e-05	0.000432767	Treg_IK_StimVSTreg_IK_Unstim	ENSMUST00000054786	Igbp1b-201
OCR_73532	chr3	101076444	101076595	-1.10598	1.76777	19.561	4.15e-05	0.000441652	Treg_IK_StimVSTreg_IK_Unstim	ENSMUST00000156103	Cd2-003
OCR_4275	chr1	110273316	110274168	1.04807	2.05047	19.4738	4.3e-05	0.000454023	Treg_IK_StimVSTreg_IK_Unstim	ENSMUST00000104049	SNORA17.51-201
OCR_93683	chr6	65948104	65948720	-1.21766	2.07234	19.3731	4.47e-05	0.000468966	Treg_IK_StimVSTreg_IK_Unstim	ENSMUST00000082457	U6.5-201
OCR_47476	chr16	87248810	87249194	-1.18013	1.69246	19.3108	4.58e-05	0.000478388	Treg_IK_StimVSTreg_IK_Unstim	ENSMUST00000054442	N6amt1-001
OCR_15713	chr10	126702787	126702985	-1.03441	2.1212	19.2279	4.74e-05	0.000491765	Treg_IK_StimVSTreg_IK_Unstim	ENSMUST00000026479	Dctn2-201
OCR_5110	chr1	134834919	134835779	1.15453	2.139	19.261	4.75e-05	0.000493201	Treg_IK_StimVSTreg_IK_Unstim	ENSMUST00000159088	Lrrn2-002
OCR_92536	chr6	40391805	40392049	-1.04737	1.91775	19.1885	4.81e-05	0.000498198	Treg_IK_StimVSTreg_IK_Unstim	ENSMUST00000038907	Wee2-001
OCR_7598	chr1	178879889	178880153	-1.30241	1.82439	19.2414	4.84e-05	0.000499717	Treg_IK_StimVSTreg_IK_Unstim	ENSMUST00000150600	Gm15423-001
OCR_3319	chr1	88344272	88344746	1.00826	1.74795	19.1415	4.9e-05	0.00050511	Treg_IK_StimVSTreg_IK_Unstim	ENSMUST00000046004	1700019O17Rik-201
OCR_114468	chr9	79349810	79350239	-1.02924	2.05136	19.1395	4.91e-05	0.000505347	Treg_IK_StimVSTreg_IK_Unstim	ENSMUST00000135009	Col12a1-003
OCR_35608	chr14	54788153	54788396	-1.2937	1.45904	19.136	4.91e-05	0.000505786	Treg_IK_StimVSTreg_IK_Unstim	ENSMUST00000103694	Traj49-201
OCR_116423	chr9	120880119	120880554	-1.03521	1.75102	19.0958	4.99e-05	0.000512174	Treg_IK_StimVSTreg_IK_Unstim	ENSMUST00000139138	Ctnnb1-008
OCR_87384	chr5	91712027	91712449	-1.13664	1.8767	19.0943	4.99e-05	0.000512371	Treg_IK_StimVSTreg_IK_Unstim	ENSMUST00000082599	U6.52-201
OCR_116078	chr9	115474590	115474893	-1.04623	1.73367	19.041	5.1e-05	0.000520623	Treg_IK_StimVSTreg_IK_Unstim	ENSMUST00000083215	n-R5s92-201
OCR_3813	chr1	95346753	95346993	-1.14506	1.5629	19.0069	5.17e-05	0.000526195	Treg_IK_StimVSTreg_IK_Unstim	ENSMUST00000042498	Hdlbp-201
OCR_69611	chr3	8246235	8246638	1.08537	2.48738	18.9376	5.32e-05	0.000538152	Treg_IK_StimVSTreg_IK_Unstim	ENSMUST00000060110	Gm7103-201
OCR_30136	chr13	62865262	62865448	-1.05666	1.80642	18.9036	5.39e-05	0.00054419	Treg_IK_StimVSTreg_IK_Unstim	ENSMUST00000102295	Mir713-201
OCR_965	chr1	35819708	35820382	1.17167	2.02261	18.9121	5.45e-05	0.000549568	Treg_IK_StimVSTreg_IK_Unstim	ENSMUST00000082667	U6.70-201
OCR_92326	chr6	37157597	37158470	-1.05382	2.0604	18.8738	5.45e-05	0.000549568	Treg_IK_StimVSTreg_IK_Unstim	ENSMUST00000042075	Dgki-002
OCR_12185	chr10	67762808	67763303	1.05847	1.73039	18.8708	5.46e-05	0.000550041	Treg_IK_StimVSTreg_IK_Unstim	ENSMUST00000020106	Arid5b-201
OCR_103557	chr7	122758617	122758952	-1.04533	1.93764	18.8696	5.46e-05	0.000550198	Treg_IK_StimVSTreg_IK_Unstim	ENSMUST00000169129	Sox6-205
OCR_20213	chr11	98189488	98190262	1.05761	2.15029	18.8513	5.57e-05	0.000558296	Treg_IK_StimVSTreg_IK_Unstim	ENSMUST00000041685	Neurod2-001
OCR_74190	chr3	115675818	115676063	-1.02309	2.11313	18.7668	5.69e-05	0.000567466	Treg_IK_StimVSTreg_IK_Unstim	ENSMUST00000158636	Mir669n-201
OCR_34619	chr14	30840632	30840932	-1.05956	1.87349	18.6946	5.86e-05	0.000580645	Treg_IK_StimVSTreg_IK_Unstim	ENSMUST00000167454	Chdh-202
OCR_111007	chr8	128204841	128205610	-1.05201	2.03905	18.6438	5.98e-05	0.000590184	Treg_IK_StimVSTreg_IK_Unstim	ENSMUST00000170560	4933403G14Rik-202
OCR_30904	chr13	79014615	79015273	1.05269	2.16505	18.6675	5.99e-05	0.000591514	Treg_IK_StimVSTreg_IK_Unstim	ENSMUST00000157810	SNORA48.17-201
OCR_42248	chr15	84062034	84063002	1.09735	2.24912	18.6193	6.04e-05	0.00059472	Treg_IK_StimVSTreg_IK_Unstim	ENSMUST00000023072	Parvb-001
OCR_57649	chr19	5058845	5059996	1.03848	2.55612	19.4607	6.07e-05	0.000597351	Treg_IK_StimVSTreg_IK_Unstim	ENSMUST00000025818	Rin1-201
OCR_110677	chr8	124103696	124103885	-1.02479	1.73311	18.5969	6.09e-05	0.000598681	Treg_IK_StimVSTreg_IK_Unstim	ENSMUST00000034268	Fbxo31-201
OCR_51466	chr17	60754827	60755411	1.12096	1.94293	18.5728	6.17e-05	0.000605665	Treg_IK_StimVSTreg_IK_Unstim	ENSMUST00000082798	U1.29-201
OCR_109831	chr8	111231657	111232062	-1.10467	1.70695	18.5036	6.32e-05	0.000617746	Treg_IK_StimVSTreg_IK_Unstim	ENSMUST00000043896	Zfhx3-001
OCR_49706	chr17	28712291	28712971	1.2025	2.26806	20.1749	6.41e-05	0.000624973	Treg_IK_StimVSTreg_IK_Unstim	ENSMUST00000080780	Lhfpl5-001
OCR_79449	chr4	71306735	71307597	1.04534	2.16608	18.4415	6.48e-05	0.000630157	Treg_IK_StimVSTreg_IK_Unstim	ENSMUST00000117895	Gm11231-001
OCR_47446	chr16	85998815	85999536	1.10794	2.07189	18.4007	6.64e-05	0.000642595	Treg_IK_StimVSTreg_IK_Unstim	ENSMUST00000023611	Adamts5-201
OCR_9327	chr10	11217851	11219552	1.08872	3.13545	21.3393	6.73e-05	0.000649498	Treg_IK_StimVSTreg_IK_Unstim	ENSMUST00000052902	Gm9797-201
OCR_69412	chr2	180437634	180437875	-1.02356	2.0007	18.3389	6.75e-05	0.00065133	Treg_IK_StimVSTreg_IK_Unstim	ENSMUST00000087517	Dido1-002
OCR_111154	chr8	130024524	130024739	-1.22571	1.76225	18.5831	6.87e-05	0.000660078	Treg_IK_StimVSTreg_IK_Unstim	ENSMUST00000159511	Pard3-025
OCR_47843	chr16	92793213	92793497	-1.01675	1.82583	18.2713	6.94e-05	0.000665212	Treg_IK_StimVSTreg_IK_Unstim	ENSMUST00000113957	Runx1-204
OCR_109839	chr8	111343781	111344075	-1.16813	1.8599	18.2583	7.03e-05	0.000672566	Treg_IK_StimVSTreg_IK_Unstim	ENSMUST00000175846	RP24-302G16.1-001
OCR_66499	chr2	134506979	134507370	-1.08001	2.18016	18.3234	7.25e-05	0.000690555	Treg_IK_StimVSTreg_IK_Unstim	ENSMUST00000038228	Tmx4-001
OCR_26892	chr12	115186309	115186574	-1.02851	2.01174	18.157	7.27e-05	0.000691348	Treg_IK_StimVSTreg_IK_Unstim	ENSMUST00000103464	Ighv4-1-201
OCR_102335	chr7	99122572	99123569	1.01254	2.63883	18.4421	7.27e-05	0.000691348	Treg_IK_StimVSTreg_IK_Unstim	ENSMUST00000098308	Dlg2-004
OCR_66172	chr2	128361850	128362627	1.08194	1.88436	18.0687	7.53e-05	0.000709578	Treg_IK_StimVSTreg_IK_Unstim	ENSMUST00000122132	Gm14006-001
OCR_83229	chr4	145720459	145721093	1.00745	2.26203	18.0623	7.55e-05	0.00071051	Treg_IK_StimVSTreg_IK_Unstim	ENSMUST00000094493	Gm13241-001
OCR_959	chr1	35460576	35461673	1.18579	2.07384	18.0814	7.61e-05	0.000714822	Treg_IK_StimVSTreg_IK_Unstim	ENSMUST00000104043	SNORA17.48-201
OCR_87305	chr5	90109043	90109461	-1.08558	1.97986	18.03	7.65e-05	0.000717771	Treg_IK_StimVSTreg_IK_Unstim	ENSMUST00000122551	7SK.22-201
OCR_93010	chr6	51120499	51120734	-1.01505	1.79317	17.9957	7.75e-05	0.000726525	Treg_IK_StimVSTreg_IK_Unstim	ENSMUST00000083571	Mir148a-201
OCR_17695	chr11	48741358	48741936	1.04263	2.0958	18.5258	7.79e-05	0.000729015	Treg_IK_StimVSTreg_IK_Unstim	ENSMUST00000129318	Gm12185-002
OCR_56491	chr18	73918738	73918919	-1.07863	1.60648	17.9354	7.95e-05	0.000742138	Treg_IK_StimVSTreg_IK_Unstim	ENSMUST00000041138	Elac1-001
OCR_117933	chrX	105732383	105732680	-1.02878	1.94891	17.8603	8.19e-05	0.000760437	Treg_IK_StimVSTreg_IK_Unstim	ENSMUST00000121068	Gm9218-001
OCR_110791	chr8	125452805	125453134	-1.11788	1.74447	17.8694	8.26e-05	0.000764944	Treg_IK_StimVSTreg_IK_Unstim	ENSMUST00000174833	Ankrd11-003
OCR_93821	chr6	67581714	67581941	-1.27006	1.31699	17.8329	8.28e-05	0.00076675	Treg_IK_StimVSTreg_IK_Unstim	ENSMUST00000103303	Igkv1-135-201
OCR_111299	chr9	3025423	3025647	1.02881	2.90284	19.7866	8.34e-05	0.000771092	Treg_IK_StimVSTreg_IK_Unstim	ENSMUST00000075573	Gm10717-201
OCR_23683	chr12	45673736	45674124	-1.15661	1.82796	17.7594	8.53e-05	0.000785045	Treg_IK_StimVSTreg_IK_Unstim	ENSMUST00000165115	Nrcam-205
OCR_47117	chr16	76540673	76541069	-1.00016	1.79964	17.7312	8.63e-05	0.000792711	Treg_IK_StimVSTreg_IK_Unstim	ENSMUST00000052867	Gm9843-201
OCR_118372	chrX	156111495	156111718	-1.13631	1.82938	18.7284	8.65e-05	0.000794205	Treg_IK_StimVSTreg_IK_Unstim	ENSMUST00000123433	Sh3kbp1-012
OCR_19507	chr11	83882555	83882891	-1.02069	2.19565	17.9424	8.71e-05	0.000798245	Treg_IK_StimVSTreg_IK_Unstim	ENSMUST00000138208	Dusp14-003
OCR_50459	chr17	39980015	39983685	1.11712	11.3771	41.9068	8.73e-05	0.000800016	Treg_IK_StimVSTreg_IK_Unstim	ENSMUST00000062783	AY036118-201
OCR_42892	chr15	95722591	95723065	-1.0258	1.69505	17.5881	9.15e-05	0.000829603	Treg_IK_StimVSTreg_IK_Unstim	ENSMUST00000175237	AC113178.1-201
OCR_86347	chr5	64327899	64328627	1.01721	1.91324	17.5793	9.18e-05	0.000832162	Treg_IK_StimVSTreg_IK_Unstim	ENSMUST00000154532	Rell1-004
OCR_35576	chr14	54161389	54161700	-1.03267	2.31369	17.589	9.23e-05	0.000835259	Treg_IK_StimVSTreg_IK_Unstim	ENSMUST00000103651	Trav13-1-201
OCR_65357	chr2	113270962	113271380	-1.04382	2.15902	17.5176	9.41e-05	0.000849425	Treg_IK_StimVSTreg_IK_Unstim	ENSMUST00000081349	Fmn1-002
OCR_44249	chr16	14701486	14701787	-1.05798	1.87733	17.4533	9.66e-05	0.000868258	Treg_IK_StimVSTreg_IK_Unstim	ENSMUST00000023356	Snai2-201
OCR_106125	chr8	19985717	19985989	1.18285	2.10764	18.2588	9.86e-05	0.000882451	Treg_IK_StimVSTreg_IK_Unstim	ENSMUST00000139264	2610005L07Rik-002
OCR_92018	chr6	31008320	31008560	-1.19306	1.53178	17.4327	9.89e-05	0.000884761	Treg_IK_StimVSTreg_IK_Unstim	ENSMUST00000083676	Mir29a-201
OCR_27890	chr13	13706216	13706481	-1.15509	1.73897	17.3696	0.0001	0.000893542	Treg_IK_StimVSTreg_IK_Unstim	ENSMUST00000166697	Lyst-203
OCR_63873	chr2	77041912	77042621	-1.05839	2.28396	17.5673	0.000101216	0.000902258	Treg_IK_StimVSTreg_IK_Unstim	ENSMUST00000145366	Sestd1-004
OCR_79014	chr4	59020035	59020251	-1.00872	1.76806	17.3313	0.000101555	0.000904603	Treg_IK_StimVSTreg_IK_Unstim	ENSMUST00000174664	Gm20503-001
OCR_48350	chr17	3570914	3571365	-1.0038	1.85748	17.325	0.000101817	0.000906806	Treg_IK_StimVSTreg_IK_Unstim	ENSMUST00000041003	Tfb1m-201
OCR_49101	chr17	15952717	15953129	-1.03036	1.85518	17.1708	0.000108435	0.000956132	Treg_IK_StimVSTreg_IK_Unstim	ENSMUST00000057264	Rgmb-201
OCR_10001	chr10	21862099	21862962	1.10406	4.44421	26.0895	0.000109741	0.00096592	Treg_IK_StimVSTreg_IK_Unstim	ENSMUST00000069372	E030030I06Rik-201
OCR_89269	chr5	123616538	123617161	1.15899	2.17776	17.9143	0.000110979	0.000973927	Treg_IK_StimVSTreg_IK_Unstim	ENSMUST00000162839	Setd1b-003
OCR_32371	chr13	105708751	105709073	-1.01453	1.80009	17.1078	0.000111268	0.000976182	Treg_IK_StimVSTreg_IK_Unstim	ENSMUST00000171334	Gm4938-201
OCR_21090	chr11	113014671	113015159	-1.02787	2.22337	17.5328	0.000113582	0.0009931	Treg_IK_StimVSTreg_IK_Unstim	ENSMUST00000136438	2610035D17Rik-002
OCR_90873	chr5	150653589	150653969	-1.0065	2.20327	17.0542	0.000113738	0.000994323	Treg_IK_StimVSTreg_IK_Unstim	ENSMUST00000159581	B3galtl-002
OCR_103132	chr7	116314021	116314271	-1.21377	1.81925	17.0524	0.000115938	0.00100836	Treg_IK_StimVSTreg_IK_Unstim	ENSMUST00000036992	Lmo1-201
OCR_116113	chr9	116062956	116063307	-1.00886	1.88942	16.9637	0.000118039	0.00102213	Treg_IK_StimVSTreg_IK_Unstim	ENSMUST00000035014	Tgfbr2-201
OCR_109588	chr8	107313863	107314129	-1.06015	1.71743	16.9633	0.000118058	0.00102215	Treg_IK_StimVSTreg_IK_Unstim	ENSMUST00000093229	4932416K20Rik-201
OCR_29456	chr13	48209583	48210436	1.11523	2.10716	17.1357	0.000118723	0.00102626	Treg_IK_StimVSTreg_IK_Unstim	ENSMUST00000061899	4931429P17Rik-201
OCR_74268	chr3	117062974	117063621	1.05428	2.21202	16.8484	0.000123762	0.00106333	Treg_IK_StimVSTreg_IK_Unstim	ENSMUST00000061071	D3Bwg0562e-001
OCR_68368	chr2	165217109	165217376	-1.0285	1.63622	16.8396	0.000124213	0.00106688	Treg_IK_StimVSTreg_IK_Unstim	ENSMUST00000103084	Zfp334-001
OCR_53452	chr18	5630490	5631014	-1.01429	1.72726	16.811	0.000125681	0.00107668	Treg_IK_StimVSTreg_IK_Unstim	ENSMUST00000116893	AC127028.1-201
OCR_111884	chr9	20538879	20539443	1.01321	2.03078	16.7642	0.000128124	0.00109334	Treg_IK_StimVSTreg_IK_Unstim	ENSMUST00000034692	Olfm2-201
OCR_118240	chrX	142107399	142107810	-1.12464	1.81268	16.7356	0.000129644	0.00110393	Treg_IK_StimVSTreg_IK_Unstim	ENSMUST00000119550	Gm15060-001
OCR_24207	chr12	65853549	65854459	1.01438	2.26134	16.6066	0.00013785	0.00116032	Treg_IK_StimVSTreg_IK_Unstim	ENSMUST00000104515	SNORA17.282-201
OCR_59676	chr19	57717516	57717773	-1.05547	1.53882	16.5508	0.000139912	0.00117369	Treg_IK_StimVSTreg_IK_Unstim	ENSMUST00000059255	Atrnl1-201
OCR_72857	chr3	89055238	89055772	1.07975	2.02652	16.6542	0.00014493	0.00120539	Treg_IK_StimVSTreg_IK_Unstim	ENSMUST00000132818	Krtcap2-002
OCR_59946	chr2	4440143	4440701	-1.04626	1.69095	16.3602	0.000151387	0.00124682	Treg_IK_StimVSTreg_IK_Unstim	ENSMUST00000153160	Frmd4a-006
OCR_28682	chr13	31174319	31174597	-1.12239	1.56899	16.3492	0.000152102	0.00125201	Treg_IK_StimVSTreg_IK_Unstim	ENSMUST00000120294	Gm11371-001
OCR_64694	chr2	99486603	99487202	1.02823	1.93527	16.3336	0.000153068	0.00125826	Treg_IK_StimVSTreg_IK_Unstim	ENSMUST00000117921	Gm13809-001
OCR_24738	chr12	76918509	76918743	-1.04892	1.62184	16.3297	0.000153315	0.00125994	Treg_IK_StimVSTreg_IK_Unstim	ENSMUST00000142864	Syne2-009
OCR_112402	chr9	32424181	32424438	-1.15873	1.60927	16.3142	0.000154301	0.00126646	Treg_IK_StimVSTreg_IK_Unstim	ENSMUST00000058892	Ets1-203
OCR_86615	chr5	67623783	67624091	-1.08027	1.60693	16.2398	0.000159143	0.00129812	Treg_IK_StimVSTreg_IK_Unstim	ENSMUST00000037918	Tmem33-001
OCR_105030	chr7	147374172	147374788	-1.05984	1.91213	16.3867	0.000160744	0.00130795	Treg_IK_StimVSTreg_IK_Unstim	ENSMUST00000055890	Olfr523-201
OCR_69150	chr2	177282125	177282439	-1.00698	1.66143	16.2076	0.000161284	0.00131126	Treg_IK_StimVSTreg_IK_Unstim	ENSMUST00000142549	Gm14403-002
OCR_67152	chr2	146724720	146725038	-1.11092	1.56068	16.1091	0.000168025	0.00135144	Treg_IK_StimVSTreg_IK_Unstim	ENSMUST00000156232	Plk1s1-002
OCR_107737	chr8	68980895	68981256	-1.09288	1.52439	16.0549	0.000171855	0.00137572	Treg_IK_StimVSTreg_IK_Unstim	ENSMUST00000140669	Gm15356-001
OCR_113297	chr9	51786026	51786560	-1.12361	1.69529	16.319	0.00017509	0.00139694	Treg_IK_StimVSTreg_IK_Unstim	ENSMUST00000098775	Fdx1-202
OCR_87250	chr5	89313112	89313368	-1.10911	1.63275	16.0567	0.000177156	0.00140997	Treg_IK_StimVSTreg_IK_Unstim	ENSMUST00000148750	Slc4a4-001
OCR_28395	chr13	24696066	24696265	-1.00093	2.00348	16.0316	0.00017755	0.00141254	Treg_IK_StimVSTreg_IK_Unstim	ENSMUST00000127863	Gm11346-004
OCR_97581	chr6	137743715	137744306	1	2.07659	15.9991	0.000180785	0.00143348	Treg_IK_StimVSTreg_IK_Unstim	ENSMUST00000087675	Dera-201
OCR_44908	chr16	26598631	26599074	-1.03824	1.80393	15.9195	0.000181835	0.00144045	Treg_IK_StimVSTreg_IK_Unstim	ENSMUST00000023156	Il1rap-004
OCR_72380	chr3	80823548	80824308	-1.17915	2.38514	17.5581	0.000185191	0.00146138	Treg_IK_StimVSTreg_IK_Unstim	ENSMUST00000029652	Pdgfc-001
OCR_67062	chr2	145383199	145383597	-1.02329	2.08389	15.8416	0.000190197	0.00149315	Treg_IK_StimVSTreg_IK_Unstim	ENSMUST00000136794	Gm14092-001
OCR_112777	chr9	42277472	42277748	-1.08507	2.064	15.7856	0.000192294	0.00150562	Treg_IK_StimVSTreg_IK_Unstim	ENSMUST00000128959	Tbcel-002
OCR_106525	chr8	32323044	32323843	1.06026	2.09571	15.7957	0.000192351	0.00150587	Treg_IK_StimVSTreg_IK_Unstim	ENSMUST00000120464	Gm8051-001
OCR_80280	chr4	95197248	95197751	-1.03364	2.04253	15.7822	0.000192564	0.00150734	Treg_IK_StimVSTreg_IK_Unstim	ENSMUST00000083811	U1.88-201
OCR_115979	chr9	114330402	114330653	-1.04792	1.6001	15.7759	0.000193071	0.00151071	Treg_IK_StimVSTreg_IK_Unstim	ENSMUST00000166595	Glb1-203
OCR_55637	chr18	58136348	58136788	-1.03142	2.32804	16.4661	0.000198925	0.00154713	Treg_IK_StimVSTreg_IK_Unstim	ENSMUST00000167134	Slc12a2-202
OCR_107100	chr8	46665449	46666978	1.13076	3.11897	19.5275	0.000209106	0.00160985	Treg_IK_StimVSTreg_IK_Unstim	ENSMUST00000104311	SNORA17.185-201
OCR_114469	chr9	79533913	79534206	-1.0244	1.60257	15.5005	0.000216702	0.00165645	Treg_IK_StimVSTreg_IK_Unstim	ENSMUST00000123894	4930562D21Rik-001
OCR_53450	chr18	5623477	5623834	-1.06212	1.57619	15.4726	0.000219255	0.00167403	Treg_IK_StimVSTreg_IK_Unstim	ENSMUST00000116893	AC127028.1-201
OCR_36227	chr14	66397817	66398037	-1.0234	1.53017	15.4241	0.000223774	0.00170312	Treg_IK_StimVSTreg_IK_Unstim	ENSMUST00000022612	Pbk-001
OCR_109193	chr8	95030779	95031226	-1.19275	2.02639	15.6936	0.00022386	0.00170356	Treg_IK_StimVSTreg_IK_Unstim	ENSMUST00000034184	Irx5-001
OCR_75704	chr3	145290724	145291109	-1.00459	1.87944	15.3749	0.000228455	0.00173142	Treg_IK_StimVSTreg_IK_Unstim	ENSMUST00000029846	Cyr61-201
OCR_60756	chr2	18893289	18893505	-1.05864	1.82877	15.8133	0.00023013	0.001741	Treg_IK_StimVSTreg_IK_Unstim	ENSMUST00000006912	Pip4k2a-001
OCR_35195	chr14	44561620	44562033	-1.06024	2.2933	16.0319	0.000231801	0.00175007	Treg_IK_StimVSTreg_IK_Unstim	ENSMUST00000161871	Ear-ps10-001
OCR_59913	chr2	3701942	3702297	-1.03745	1.84327	15.3203	0.000233769	0.00176246	Treg_IK_StimVSTreg_IK_Unstim	ENSMUST00000176254	Fam107b-005
OCR_102693	chr7	106522898	106523186	-1.02889	1.73642	15.2483	0.000240966	0.00180639	Treg_IK_StimVSTreg_IK_Unstim	ENSMUST00000037528	Gdpd5-201
OCR_30297	chr13	65359610	65361485	1.20236	3.21462	20.7286	0.000242036	0.00181212	Treg_IK_StimVSTreg_IK_Unstim	ENSMUST00000099425	Gm10775-201
OCR_51145	chr17	52442590	52443043	-1.03694	2.00838	15.2123	0.000244661	0.00182648	Treg_IK_StimVSTreg_IK_Unstim	ENSMUST00000104873	AC121600.1-201
OCR_30104	chr13	60861809	60862499	1.08587	2.05635	15.6466	0.000245895	0.00183292	Treg_IK_StimVSTreg_IK_Unstim	ENSMUST00000109808	BC051665-202
OCR_18023	chr11	53953458	53954213	1.35684	4.77517	28.5105	0.000247611	0.00184386	Treg_IK_StimVSTreg_IK_Unstim	ENSMUST00000139315	P4ha2-004
OCR_60660	chr2	17337083	17337354	-1.12061	1.59388	15.1732	0.000248732	0.00185001	Treg_IK_StimVSTreg_IK_Unstim	ENSMUST00000137253	Nebl-007
OCR_60505	chr2	13859840	13860072	-1.19999	1.44695	15.1492	0.000251263	0.00186568	Treg_IK_StimVSTreg_IK_Unstim	ENSMUST00000131730	Ptpla-002
OCR_53547	chr18	7608526	7609047	-1.10605	3.17308	20.6222	0.00025735	0.00190444	Treg_IK_StimVSTreg_IK_Unstim	ENSMUST00000115869	Mpp7-202
OCR_82972	chr4	141002071	141002336	-1.02013	1.41804	15.0433	0.000262778	0.00193735	Treg_IK_StimVSTreg_IK_Unstim	ENSMUST00000144899	Zbtb17-004
OCR_32643	chr13	109980521	109981077	-1.00755	1.74014	14.7939	0.000292097	0.0021082	Treg_IK_StimVSTreg_IK_Unstim	ENSMUST00000153234	Pde4d-005
OCR_1002	chr1	36332701	36332879	-1.01448	1.88735	14.704	0.000303476	0.00217184	Treg_IK_StimVSTreg_IK_Unstim	ENSMUST00000056946	Neurl3-201
OCR_49710	chr17	28755776	28756015	-1.01652	1.70795	14.6754	0.000307196	0.00219396	Treg_IK_StimVSTreg_IK_Unstim	ENSMUST00000145023	Srpk1-003
OCR_118599	chrX	165098230	165098482	-1.08621	1.43304	14.6125	0.000319015	0.0022642	Treg_IK_StimVSTreg_IK_Unstim	ENSMUST00000145564	Msl3-004
OCR_84129	chr5	4948187	4948596	-1.11749	2.12952	15.3574	0.000331909	0.0023345	Treg_IK_StimVSTreg_IK_Unstim	ENSMUST00000157506	SCARNA15.1-201
OCR_109178	chr8	94890726	94891380	-1.00356	2.91356	16.8818	0.000333335	0.00234258	Treg_IK_StimVSTreg_IK_Unstim	ENSMUST00000034184	Irx5-001
OCR_79301	chr4	63529907	63530137	-1.05358	1.55152	14.4644	0.000336139	0.00235698	Treg_IK_StimVSTreg_IK_Unstim	ENSMUST00000030047	Tnfsf8-001
OCR_42694	chr15	92095801	92096088	-1.08371	1.62028	14.4367	0.000340138	0.00237848	Treg_IK_StimVSTreg_IK_Unstim	ENSMUST00000142073	Gm16629-201
OCR_90616	chr5	147072496	147073001	1.07336	5.60221	26.5395	0.000359506	0.00248414	Treg_IK_StimVSTreg_IK_Unstim	ENSMUST00000175336	Mir5105-201
OCR_80408	chr4	97780789	97781005	-1.04933	1.86753	14.2962	0.000361235	0.00249347	Treg_IK_StimVSTreg_IK_Unstim	ENSMUST00000120186	Gm12691-001
OCR_65396	chr2	113706399	113706651	-1.04338	1.3773	14.1602	0.000382941	0.00261411	Treg_IK_StimVSTreg_IK_Unstim	ENSMUST00000110948	Arhgap11a-002
OCR_81301	chr4	116690421	116690667	-1.03091	1.86359	14.4153	0.000408676	0.00275587	Treg_IK_StimVSTreg_IK_Unstim	ENSMUST00000106448	Eif2b3-001
OCR_35045	chr14	39286558	39287579	1.00103	2.18418	13.9899	0.000413521	0.00278317	Treg_IK_StimVSTreg_IK_Unstim	ENSMUST00000176069	RP23-352G2.1-001
OCR_56223	chr18	67771970	67772241	-1.03904	1.53082	13.8329	0.000443074	0.00293906	Treg_IK_StimVSTreg_IK_Unstim	ENSMUST00000091867	Spire1-203
OCR_89703	chr5	131915253	131916128	1.10986	2.38066	15.1127	0.000446814	0.00295727	Treg_IK_StimVSTreg_IK_Unstim	ENSMUST00000162979	Auts2-013
OCR_27242	chr12	120264855	120265122	-1.03585	1.51821	13.6144	0.000484682	0.00315763	Treg_IK_StimVSTreg_IK_Unstim	ENSMUST00000035515	Abcb5-001
OCR_95602	chr6	106699005	106699638	1.00276	2.03259	13.7813	0.000500046	0.00323807	Treg_IK_StimVSTreg_IK_Unstim	ENSMUST00000005497	Il5ra-201
OCR_81644	chr4	121706218	121706734	1.07116	2.07115	13.7431	0.000528741	0.00338584	Treg_IK_StimVSTreg_IK_Unstim	ENSMUST00000117367	Gm12892-001
OCR_92017	chr6	31005525	31005739	-1.01563	1.87935	13.3363	0.000550137	0.00349794	Treg_IK_StimVSTreg_IK_Unstim	ENSMUST00000083676	Mir29a-201
OCR_8755	chr1	195425267	195425854	-1.06869	2.4043	14.8956	0.000567015	0.00358528	Treg_IK_StimVSTreg_IK_Unstim	ENSMUST00000171228	4631405K08Rik-201
OCR_20948	chr11	108872888	108873484	1.18178	7.10486	27.9214	0.000576602	0.00363582	Treg_IK_StimVSTreg_IK_Unstim	ENSMUST00000119655	Gm11668-001
OCR_107614	chr8	64028340	64028983	1.11074	2.00133	14.0554	0.000579759	0.00365035	Treg_IK_StimVSTreg_IK_Unstim	ENSMUST00000136825	Palld-008
OCR_61178	chr2	27123463	27124341	1.24996	1.99151	14.476	0.000590577	0.00370503	Treg_IK_StimVSTreg_IK_Unstim	ENSMUST00000146843	Vav2-007
OCR_35577	chr14	54164434	54164815	-1.04261	1.49942	13.0558	0.000618305	0.00384006	Treg_IK_StimVSTreg_IK_Unstim	ENSMUST00000103651	Trav13-1-201
OCR_54883	chr18	40467631	40468119	1.21517	5.06106	23.7645	0.000627768	0.00388288	Treg_IK_StimVSTreg_IK_Unstim	ENSMUST00000091927	Kctd16-201
OCR_67301	chr2	148384162	148384408	-1.00302	1.76342	12.7384	0.000723795	0.00434863	Treg_IK_StimVSTreg_IK_Unstim	ENSMUST00000158245	SNORA17.493-201
OCR_64280	chr2	85123849	85124391	-1.07668	1.62615	12.8857	0.000734301	0.00440195	Treg_IK_StimVSTreg_IK_Unstim	ENSMUST00000117313	Gm13714-001
OCR_110832	chr8	125625601	125625997	-1.23011	2.74894	17.0839	0.000813072	0.00478712	Treg_IK_StimVSTreg_IK_Unstim	ENSMUST00000000756	Rpl13-001
OCR_68820	chr2	170556992	170557685	1.03969	1.98133	12.422	0.000822623	0.00483041	Treg_IK_StimVSTreg_IK_Unstim	ENSMUST00000029075	Dok5-001
OCR_69492	chr2	181651991	181652904	1.04861	5.09279	20.3546	0.000859736	0.00500475	Treg_IK_StimVSTreg_IK_Unstim	ENSMUST00000119395	Gm5466-001
OCR_91793	chr6	25027491	25028253	1.01107	2.27343	11.9101	0.00142359	0.0074496	Treg_IK_StimVSTreg_IK_Unstim	ENSMUST00000157242	SNORA17.341-201
OCR_11893	chr10	61487207	61488000	1.03811	2.03772	11.5186	0.00171332	0.00860749	Treg_IK_StimVSTreg_IK_Unstim	ENSMUST00000105454	Col13a1-001
OCR_71165	chr3	50104752	50105143	-1.0956	1.85746	11.5509	0.00172704	0.00866348	Treg_IK_StimVSTreg_IK_Unstim	ENSMUST00000029297	Slc7a11-001
OCR_69559	chr3	5860277	5860896	1.03332	5.59874	14.8696	0.00426251	0.0177357	Treg_IK_StimVSTreg_IK_Unstim	ENSMUST00000059021	Pxmp3-201
OCR_3095	chr1	81991311	81992198	1.04538	2.12602	9.11247	0.00543461	0.0213917	Treg_IK_StimVSTreg_IK_Unstim	ENSMUST00000023262	Gm9747-201
OCR_35157	chr14	44040256	44040745	1.16165	2.21263	9.46271	0.00625478	0.0237991	Treg_IK_StimVSTreg_IK_Unstim	ENSMUST00000095918	1700001F09Rik-001
OCR_89711	chr5	132013816	132014844	1.07467	2.59118	9.32054	0.00772592	0.0280376	Treg_IK_StimVSTreg_IK_Unstim	ENSMUST00000159507	Auts2-006
OCR_16312	chr11	8434798	8435238	-1.03074	2.79099	8.78622	0.00994935	0.0340945	Treg_IK_StimVSTreg_IK_Unstim	ENSMUST00000131941	Tns3-002
OCR_19393	chr11	80965439	80966774	1.15585	2.73566	8.71886	0.0123788	0.0403949	Treg_IK_StimVSTreg_IK_Unstim	ENSMUST00000021045	Accn1-001
OCR_16556	chr11	14042401	14043145	-9.9386	2.79489	398.7	1.02e-27	6.03e-23	Treg_IK_StimVSTreg_WT_Stim	ENSMUST00000121451	Gm12005-001
OCR_758	chr1	24619246	24619705	2.67808	5.37236	331.096	1.12e-24	3.31e-20	Treg_IK_StimVSTreg_WT_Stim	ENSMUST00000088336	Gm10222-201
OCR_37155	chr14	87450913	87451580	1.28187	6.12801	131.301	9.17e-17	1.81e-12	Treg_IK_StimVSTreg_WT_Stim	ENSMUST00000172008	Diap3-204
OCR_84387	chr5	14971117	14971980	-2.86707	2.65345	157.198	2.37e-16	3e-12	Treg_IK_StimVSTreg_WT_Stim	ENSMUST00000096953	Gm10354-001
OCR_84396	chr5	14990535	14991106	-2.97749	1.79916	125	2.53e-16	3e-12	Treg_IK_StimVSTreg_WT_Stim	ENSMUST00000096953	Gm10354-001
OCR_63300	chr2	68272498	68273151	1.4474	5.04234	121.812	4.28e-16	4.24e-12	Treg_IK_StimVSTreg_WT_Stim	ENSMUST00000123781	Stk39-002
OCR_1491	chr1	44175179	44177156	1.11547	6.31282	117.806	8.42e-16	6.57e-12	Treg_IK_StimVSTreg_WT_Stim	ENSMUST00000152643	Kdelc1-006
OCR_11434	chr10	53746373	53747091	1.25914	5.8365	117.502	8.86e-16	6.57e-12	Treg_IK_StimVSTreg_WT_Stim	ENSMUST00000105470	Man1a-002
OCR_11083	chr10	43958231	43958862	-3.88112	2.24078	170.654	1.23e-15	8.09e-12	Treg_IK_StimVSTreg_WT_Stim	ENSMUST00000169525	Speer5-ps1-001
OCR_2722	chr1	74341686	74342674	1.38529	5.29117	113.671	1.72e-15	1.02e-11	Treg_IK_StimVSTreg_WT_Stim	ENSMUST00000152603	Tmbim1-004
OCR_62074	chr2	44200190	44201260	1.3691	5.07931	112.752	2.02e-15	1.09e-11	Treg_IK_StimVSTreg_WT_Stim	ENSMUST00000157499	U6.649-201
OCR_55423	chr18	55019497	55020927	1.33727	5.43606	111.364	2.93e-15	1.34e-11	Treg_IK_StimVSTreg_WT_Stim	ENSMUST00000168742	Gm17270-201
OCR_62906	chr2	60208133	60209047	1.55578	5.14921	114.938	2.83e-15	1.34e-11	Treg_IK_StimVSTreg_WT_Stim	ENSMUST00000028362	Ly75-201
OCR_100621	chr7	58979118	58980158	1.22183	5.60849	109.77	3.42e-15	1.45e-11	Treg_IK_StimVSTreg_WT_Stim	ENSMUST00000164238	Gm7336-201
OCR_114964	chr9	92278798	92279890	1.20192	5.70529	108.995	3.93e-15	1.55e-11	Treg_IK_StimVSTreg_WT_Stim	ENSMUST00000135182	1700057G04Rik-005
OCR_17126	chr11	29925609	29926499	1.49286	4.68278	105.839	6.96e-15	2.45e-11	Treg_IK_StimVSTreg_WT_Stim	ENSMUST00000058902	Eml6-001
OCR_54416	chr18	32723732	32724738	1.35283	5.28069	105.801	7.01e-15	2.45e-11	Treg_IK_StimVSTreg_WT_Stim	ENSMUST00000174459	Gypc-001
OCR_4209	chr1	108508827	108509804	1.51987	4.88305	108.27	1.25e-14	4.12e-11	Treg_IK_StimVSTreg_WT_Stim	ENSMUST00000144260	D630008O14Rik-002
OCR_64204	chr2	84490558	84491260	2.26278	3.55543	102.379	1.32e-14	4.12e-11	Treg_IK_StimVSTreg_WT_Stim	ENSMUST00000066177	Ctnnd1-004
OCR_15987	chr11	3099481	3099996	-1.17601	5.32965	106.615	1.69e-14	4.78e-11	Treg_IK_StimVSTreg_WT_Stim	ENSMUST00000020734	Eif4enif1-002
OCR_79087	chr4	59695272	59696080	1.27335	5.53155	100.107	2.3e-14	6.2e-11	Treg_IK_StimVSTreg_WT_Stim	ENSMUST00000152797	E130308A19Rik-002
OCR_54694	chr18	37965560	37967074	1.15538	5.48069	98.3702	2.82e-14	7.27e-11	Treg_IK_StimVSTreg_WT_Stim	ENSMUST00000076807	Pcdhga9-208
OCR_54156	chr18	24003152	24003928	1.28959	5.4747	97.9361	3.44e-14	7.28e-11	Treg_IK_StimVSTreg_WT_Stim	ENSMUST00000158665	U6.881-201
OCR_79813	chr4	84831801	84833047	-1.92555	2.87029	98.8687	3.04e-14	7.28e-11	Treg_IK_StimVSTreg_WT_Stim	ENSMUST00000119153	Gm12417-001
OCR_84385	chr5	14961274	14962066	-3.13483	2.01529	123.723	3.19e-14	7.28e-11	Treg_IK_StimVSTreg_WT_Stim	ENSMUST00000096953	Gm10354-001
OCR_106263	chr8	25269296	25270387	-1.89938	2.70479	97.3883	3.4e-14	7.28e-11	Treg_IK_StimVSTreg_WT_Stim	ENSMUST00000066740	A730045E13Rik-001
OCR_106523	chr8	32297239	32298375	1.38584	4.83125	97.4761	3.34e-14	7.28e-11	Treg_IK_StimVSTreg_WT_Stim	ENSMUST00000066173	Fut10-002
OCR_759	chr1	24619837	24620087	3.66997	5.524	316.447	4.04e-14	8.26e-11	Treg_IK_StimVSTreg_WT_Stim	ENSMUST00000088336	Gm10222-201
OCR_47618	chr16	89848849	89849941	1.18821	5.57627	96.0377	4.42e-14	8.74e-11	Treg_IK_StimVSTreg_WT_Stim	ENSMUST00000114122	Tiam1-009
OCR_23267	chr12	36263221	36264353	1.22114	5.19676	94.7286	5.71e-14	1.03e-10	Treg_IK_StimVSTreg_WT_Stim	ENSMUST00000116436	Ahr-001
OCR_57278	chr18	84896219	84897474	1.33485	4.77699	94.789	5.64e-14	1.03e-10	Treg_IK_StimVSTreg_WT_Stim	ENSMUST00000161033	Fam69c-003
OCR_111386	chr9	7509664	7510502	1.14126	5.64934	94.7619	5.67e-14	1.03e-10	Treg_IK_StimVSTreg_WT_Stim	ENSMUST00000034488	Mmp10-201
OCR_88377	chr5	111023481	111023963	1.5435	4.97958	99.3034	7.1e-14	1.2e-10	Treg_IK_StimVSTreg_WT_Stim	ENSMUST00000165856	Galnt9-202
OCR_55572	chr18	56896917	56897505	1.33593	5.21452	93.2589	7.62e-14	1.26e-10	Treg_IK_StimVSTreg_WT_Stim	ENSMUST00000128651	Lmnb1-002
OCR_84056	chr5	3494132	3495309	1.22116	5.3898	93.0515	7.94e-14	1.27e-10	Treg_IK_StimVSTreg_WT_Stim	ENSMUST00000168422	Gm17590-201
OCR_100483	chr7	55392530	55394125	-1.38403	4.95165	102.73	9.54e-14	1.49e-10	Treg_IK_StimVSTreg_WT_Stim	ENSMUST00000094389	Mrgprb5-201
OCR_38930	chr15	9392580	9394033	1.25677	4.95562	91.5173	1.08e-13	1.63e-10	Treg_IK_StimVSTreg_WT_Stim	ENSMUST00000042360	Capsl-201
OCR_95661	chr6	108114789	108115347	1.31368	5.00781	91.4237	1.1e-13	1.63e-10	Treg_IK_StimVSTreg_WT_Stim	ENSMUST00000171697	Sumf1-004
OCR_100072	chr7	46799240	46800509	1.02955	6.04723	90.579	1.3e-13	1.89e-10	Treg_IK_StimVSTreg_WT_Stim	ENSMUST00000108015	Zfp619-001
OCR_46101	chr16	49982202	49982978	1.48071	4.35404	89.0396	1.78e-13	2.52e-10	Treg_IK_StimVSTreg_WT_Stim	ENSMUST00000113709	Cd47-202
OCR_23263	chr12	36247417	36248079	1.56387	4.4856	87.8844	2.34e-13	3.22e-10	Treg_IK_StimVSTreg_WT_Stim	ENSMUST00000116436	Ahr-001
OCR_3452	chr1	90196964	90198499	-1.13594	5.00873	89.3482	3.12e-13	4.08e-10	Treg_IK_StimVSTreg_WT_Stim	ENSMUST00000113114	Trpm8-001
OCR_14838	chr10	114769157	114770457	1.20462	5.11173	86.2174	3.18e-13	4.08e-10	Treg_IK_StimVSTreg_WT_Stim	ENSMUST00000020343	Rab21-201
OCR_105552	chr8	8984287	8985788	-1.44174	4.08201	86.498	3.31e-13	4.09e-10	Treg_IK_StimVSTreg_WT_Stim	ENSMUST00000048545	Arglu1-201
OCR_50908	chr17	49109367	49110092	-2.27053	2.04489	85.8119	3.46e-13	4.19e-10	Treg_IK_StimVSTreg_WT_Stim	ENSMUST00000163859	Lrfn2-201
OCR_35172	chr14	44075350	44075739	-2.07018	2.30102	84.5881	4.84e-13	5.58e-10	Treg_IK_StimVSTreg_WT_Stim	ENSMUST00000171913	Gm9597-001
OCR_51842	chr17	68353162	68353862	-1.83265	2.92431	85.4627	4.89e-13	5.58e-10	Treg_IK_StimVSTreg_WT_Stim	ENSMUST00000112687	Arhgap28-201
OCR_53351	chr18	3270196	3271260	1.32637	5.43344	96.8922	5.9e-13	6.41e-10	Treg_IK_StimVSTreg_WT_Stim	ENSMUST00000049942	Crem-031
OCR_55249	chr18	50146286	50146894	1.43383	4.9334	89.4811	6.04e-13	6.41e-10	Treg_IK_StimVSTreg_WT_Stim	ENSMUST00000153545	Tnfaip8-013
OCR_84372	chr5	14886725	14887232	-2.13527	2.334	84.8884	6.16e-13	6.41e-10	Treg_IK_StimVSTreg_WT_Stim	ENSMUST00000154544	Gm9758-002
OCR_84429	chr5	15135467	15136114	-2.71783	1.94622	91.7701	6.11e-13	6.41e-10	Treg_IK_StimVSTreg_WT_Stim	ENSMUST00000119100	Speer4d-003
OCR_95543	chr6	103460572	103462618	-1.08046	5.21191	82.3932	7.12e-13	7.29e-10	Treg_IK_StimVSTreg_WT_Stim	ENSMUST00000032163	Chl1-201
OCR_12056	chr10	66562977	66563478	1.23796	5.12538	81.952	7.83e-13	7.61e-10	Treg_IK_StimVSTreg_WT_Stim	ENSMUST00000020023	Reep3-201
OCR_76733	chr4	5002900	5003995	-2.01132	2.41076	82.4266	7.64e-13	7.61e-10	Treg_IK_StimVSTreg_WT_Stim	ENSMUST00000118541	Gm11779-001
OCR_84408	chr5	15025141	15025803	-2.5828	2.05028	90.6556	7.81e-13	7.61e-10	Treg_IK_StimVSTreg_WT_Stim	ENSMUST00000167908	Gm17019-001
OCR_84829	chr5	23895147	23895479	1.61871	3.88047	81.8124	8.06e-13	7.72e-10	Treg_IK_StimVSTreg_WT_Stim	ENSMUST00000138716	Atg9b-003
OCR_84585	chr5	19330266	19330853	-2.18844	1.99712	81.6313	8.38e-13	7.9e-10	Treg_IK_StimVSTreg_WT_Stim	ENSMUST00000101558	Magi2-001
OCR_5805	chr1	146155045	146156023	1.34177	5.59933	98.0915	8.64e-13	8.01e-10	Treg_IK_StimVSTreg_WT_Stim	ENSMUST00000172388	Rgs1-001
OCR_79815	chr4	84850980	84852143	-1.89279	2.85167	87.397	9.08e-13	8.29e-10	Treg_IK_StimVSTreg_WT_Stim	ENSMUST00000107188	Sh3gl2-002
OCR_31878	chr13	97974975	97975735	1.12573	5.1504	80.8615	9.89e-13	8.89e-10	Treg_IK_StimVSTreg_WT_Stim	ENSMUST00000022169	Hexb-201
OCR_14616	chr10	109891992	109893652	-1.40686	3.68278	80.5348	1.06e-12	9.4e-10	Treg_IK_StimVSTreg_WT_Stim	ENSMUST00000173294	E2f7-006
OCR_86323	chr5	63284035	63284981	1.46208	4.80936	90.0787	1.15e-12	9.91e-10	Treg_IK_StimVSTreg_WT_Stim	ENSMUST00000170704	Gm17384-201
OCR_37128	chr14	87261109	87262056	1.30368	4.55294	79.7135	1.27e-12	1.08e-09	Treg_IK_StimVSTreg_WT_Stim	ENSMUST00000172008	Diap3-204
OCR_33209	chr13	120281897	120282334	-1.70923	3.20489	88.3824	1.4e-12	1.17e-09	Treg_IK_StimVSTreg_WT_Stim	ENSMUST00000099147	Gm7120-201
OCR_22464	chr12	17513841	17514592	1.1523	5.43482	79.1704	1.45e-12	1.2e-09	Treg_IK_StimVSTreg_WT_Stim	ENSMUST00000171737	Odc1-202
OCR_77735	chr4	32213451	32214341	1.36379	4.72974	79.0364	1.47e-12	1.2e-09	Treg_IK_StimVSTreg_WT_Stim	ENSMUST00000119323	Gm11928-001
OCR_33212	chr13	120283749	120284272	-1.49909	3.19913	78.8226	1.54e-12	1.24e-09	Treg_IK_StimVSTreg_WT_Stim	ENSMUST00000099147	Gm7120-201
OCR_86186	chr5	54496517	54497285	1.50332	4.15325	78.6903	1.59e-12	1.24e-09	Treg_IK_StimVSTreg_WT_Stim	ENSMUST00000152812	Stim2-002
OCR_106978	chr8	41680164	41681084	1.0403	5.7152	79.168	1.65e-12	1.27e-09	Treg_IK_StimVSTreg_WT_Stim	ENSMUST00000173487	Mtmr7-004
OCR_87849	chr5	102802427	102803117	-1.8589	3.07502	79.2901	1.81e-12	1.38e-09	Treg_IK_StimVSTreg_WT_Stim	ENSMUST00000094559	Arhgap24-001
OCR_36590	chr14	73152411	73153237	1.42434	4.44597	78.0196	1.84e-12	1.38e-09	Treg_IK_StimVSTreg_WT_Stim	ENSMUST00000089017	Fndc3a-001
OCR_11166	chr10	45472171	45473014	-2.0131	2.24938	77.752	1.95e-12	1.43e-09	Treg_IK_StimVSTreg_WT_Stim	ENSMUST00000155368	Hace1-002
OCR_83232	chr4	145739838	145741012	-1.35871	4.13331	84.569	2.08e-12	1.49e-09	Treg_IK_StimVSTreg_WT_Stim	ENSMUST00000105733	Gm13251-001
OCR_93697	chr6	66083042	66083699	-2.15557	2.04964	77.4697	2.08e-12	1.49e-09	Treg_IK_StimVSTreg_WT_Stim	ENSMUST00000082457	U6.5-201
OCR_99161	chr7	24890344	24892341	-1.37919	3.55058	77.6181	2.16e-12	1.53e-09	Treg_IK_StimVSTreg_WT_Stim	ENSMUST00000120006	Zfp112-002
OCR_74563	chr3	126353070	126354627	1.09657	5.27289	77.2324	2.19e-12	1.53e-09	Treg_IK_StimVSTreg_WT_Stim	ENSMUST00000132762	Gm15551-001
OCR_46554	chr16	58701840	58702384	1.11561	5.41442	77.065	2.27e-12	1.53e-09	Treg_IK_StimVSTreg_WT_Stim	ENSMUST00000089318	Gpr15-201
OCR_68185	chr2	162928633	162929506	1.0125	5.43862	77.1302	2.24e-12	1.53e-09	Treg_IK_StimVSTreg_WT_Stim	ENSMUST00000175050	AL591584.1-201
OCR_100727	chr7	64641844	64642803	-1.87509	2.72723	82.6404	2.27e-12	1.53e-09	Treg_IK_StimVSTreg_WT_Stim	ENSMUST00000068394	Gabrg3-001
OCR_28365	chr13	24372228	24373505	1.2014	4.56683	76.2394	2.73e-12	1.78e-09	Treg_IK_StimVSTreg_WT_Stim	ENSMUST00000140042	Lrrc16a-007
OCR_91451	chr6	15672177	15672658	1.66853	4.42543	79.7334	2.73e-12	1.78e-09	Treg_IK_StimVSTreg_WT_Stim	ENSMUST00000120512	Mdfic-004
OCR_30617	chr13	73068156	73068879	-2.09481	2.08654	76.7823	2.85e-12	1.8e-09	Treg_IK_StimVSTreg_WT_Stim	ENSMUST00000172353	Irx2-007
OCR_33365	chr14	10117486	10118638	-1.90318	2.74649	84.7618	2.79e-12	1.8e-09	Treg_IK_StimVSTreg_WT_Stim	ENSMUST00000052615	Gm9800-201
OCR_5931	chr1	150824135	150825363	-1.89839	2.61497	79.1444	3.08e-12	1.89e-09	Treg_IK_StimVSTreg_WT_Stim	ENSMUST00000118947	Gm15443-001
OCR_29259	chr13	44416169	44417081	1.09013	5.49888	75.9196	3.03e-12	1.89e-09	Treg_IK_StimVSTreg_WT_Stim	ENSMUST00000159595	Gm5083-002
OCR_33206	chr13	120278494	120279829	-1.13516	5.17913	86.0312	3.08e-12	1.89e-09	Treg_IK_StimVSTreg_WT_Stim	ENSMUST00000175835	Gm7120-003
OCR_95741	chr6	108638044	108639127	1.03918	5.65093	75.3786	3.31e-12	1.98e-09	Treg_IK_StimVSTreg_WT_Stim	ENSMUST00000137478	0610040F04Rik-001
OCR_17819	chr11	50729164	50729867	-1.42232	3.6957	74.8503	3.73e-12	2.21e-09	Treg_IK_StimVSTreg_WT_Stim	ENSMUST00000150903	Zfp2-006
OCR_91563	chr6	17698474	17699548	1.00797	6.31215	78.2491	3.89e-12	2.26e-09	Treg_IK_StimVSTreg_WT_Stim	ENSMUST00000138726	St7-002
OCR_62791	chr2	58894730	58895681	1.2121	5.07377	74.4864	4.05e-12	2.33e-09	Treg_IK_StimVSTreg_WT_Stim	ENSMUST00000120771	Gm13557-001
OCR_108415	chr8	81674274	81675130	1.28463	4.7486	74.0501	4.47e-12	2.55e-09	Treg_IK_StimVSTreg_WT_Stim	ENSMUST00000155960	Zfp827-005
OCR_104574	chr7	141415481	141417263	-1.5419	3.56811	81.4128	4.51e-12	2.55e-09	Treg_IK_StimVSTreg_WT_Stim	ENSMUST00000067680	Adam12-001
OCR_87446	chr5	92782513	92783015	1.1977	4.63119	73.91	4.61e-12	2.58e-09	Treg_IK_StimVSTreg_WT_Stim	ENSMUST00000118006	Cxcl10-002
OCR_91732	chr6	23788302	23790021	-1.43906	3.51041	74.3891	5.4e-12	2.99e-09	Treg_IK_StimVSTreg_WT_Stim	ENSMUST00000142913	Cadps2-002
OCR_97419	chr6	135741029	135741704	-2.23098	1.95864	74.1893	6e-12	3.24e-09	Treg_IK_StimVSTreg_WT_Stim	ENSMUST00000158638	AC161364.1-201
OCR_109842	chr8	111346499	111347369	-1.61832	3.02752	72.7113	6.06e-12	3.24e-09	Treg_IK_StimVSTreg_WT_Stim	ENSMUST00000175846	RP24-302G16.1-001
OCR_100816	chr7	66005130	66006090	1.0656	6.04882	78.3321	6.2e-12	3.28e-09	Treg_IK_StimVSTreg_WT_Stim	ENSMUST00000117765	Gm6226-001
OCR_95652	chr6	107737994	107738862	-1.89804	2.30945	72.5789	6.25e-12	3.28e-09	Treg_IK_StimVSTreg_WT_Stim	ENSMUST00000049285	Lrrn1-201
OCR_8220	chr1	188855332	188856686	-1.519	2.98907	72.2564	6.73e-12	3.39e-09	Treg_IK_StimVSTreg_WT_Stim	ENSMUST00000160330	Gm15508-001
OCR_35169	chr14	44070103	44070621	-2.14278	2.07064	74.6553	6.71e-12	3.39e-09	Treg_IK_StimVSTreg_WT_Stim	ENSMUST00000171913	Gm9597-001
OCR_37858	chr14	106505366	106506356	-1.66059	2.56797	72.3157	6.64e-12	3.39e-09	Treg_IK_StimVSTreg_WT_Stim	ENSMUST00000022708	Trim52-201
OCR_87819	chr5	102397522	102398001	-2.30586	1.98778	75.0402	6.55e-12	3.39e-09	Treg_IK_StimVSTreg_WT_Stim	ENSMUST00000174598	Wdfy3-004
OCR_96593	chr6	122477253	122478232	1.06808	5.03348	72.1517	6.9e-12	3.44e-09	Treg_IK_StimVSTreg_WT_Stim	ENSMUST00000126357	Mfap5-002
OCR_70129	chr3	21475911	21477238	-1.48345	3.17697	72.1133	6.96e-12	3.44e-09	Treg_IK_StimVSTreg_WT_Stim	ENSMUST00000063988	Tbl1xr1-201
OCR_8952	chr10	4897455	4898504	-1.50628	3.57248	71.637	7.77e-12	3.77e-09	Treg_IK_StimVSTreg_WT_Stim	ENSMUST00000104408	U6.521-201
OCR_75698	chr3	145249157	145250002	-1.96554	2.28667	71.9643	7.81e-12	3.77e-09	Treg_IK_StimVSTreg_WT_Stim	ENSMUST00000098534	Znhit6-201
OCR_70604	chr3	33290515	33291975	-1.64252	3.05392	77.29	8.15e-12	3.9e-09	Treg_IK_StimVSTreg_WT_Stim	ENSMUST00000157635	SNORA48.13-201
OCR_83221	chr4	145703781	145706031	-1.25475	4.58632	82.7363	8.26e-12	3.92e-09	Treg_IK_StimVSTreg_WT_Stim	ENSMUST00000105735	Gm13247-001
OCR_5787	chr1	146090405	146091248	1.18862	4.69	71.0932	8.81e-12	4.15e-09	Treg_IK_StimVSTreg_WT_Stim	ENSMUST00000167812	Rgs1-004
OCR_95694	chr6	108398003	108398910	1.15532	5.0358	71.0635	8.87e-12	4.15e-09	Treg_IK_StimVSTreg_WT_Stim	ENSMUST00000165865	Itpr1-205
OCR_69998	chr3	19510734	19511632	1.50364	3.76837	70.9546	9.1e-12	4.22e-09	Treg_IK_StimVSTreg_WT_Stim	ENSMUST00000119133	1700064H15Rik-001
OCR_67034	chr2	145050966	145052553	-1.29162	4.1631	72.6514	9.3e-12	4.28e-09	Treg_IK_StimVSTreg_WT_Stim	ENSMUST00000137908	Slc24a3-004
OCR_67369	chr2	149656075	149657215	-1.48757	3.14113	70.8308	9.37e-12	4.28e-09	Treg_IK_StimVSTreg_WT_Stim	ENSMUST00000109935	Tmem90b-001
OCR_87877	chr5	103132186	103133080	-1.95105	2.35691	70.6156	9.96e-12	4.51e-09	Treg_IK_StimVSTreg_WT_Stim	ENSMUST00000112853	Arhgap24-005
OCR_71519	chr3	55463436	55464653	-1.44571	3.67956	70.6986	1.01e-11	4.53e-09	Treg_IK_StimVSTreg_WT_Stim	ENSMUST00000082970	U6.163-201
OCR_3428	chr1	90139199	90139553	-1.27942	3.48387	70.3408	1.05e-11	4.66e-09	Treg_IK_StimVSTreg_WT_Stim	ENSMUST00000142632	Heatr7b1-004
OCR_32035	chr13	100560802	100561176	-1.52703	2.89411	70.3355	1.05e-11	4.66e-09	Treg_IK_StimVSTreg_WT_Stim	ENSMUST00000104485	SNORA17.265-201
OCR_80447	chr4	98860322	98861522	-1.23557	4.29728	69.8394	1.18e-11	5.18e-09	Treg_IK_StimVSTreg_WT_Stim	ENSMUST00000030279	Atg4c-001
OCR_84455	chr5	15388545	15389826	-1.6168	2.79578	71.0111	1.19e-11	5.18e-09	Treg_IK_StimVSTreg_WT_Stim	ENSMUST00000122706	U3.15-201
OCR_8	chr1	3661260	3662657	-1.47681	3.09475	69.7965	1.21e-11	5.24e-09	Treg_IK_StimVSTreg_WT_Stim	ENSMUST00000070533	Xkr4-001
OCR_56810	chr18	78817451	78818017	-2.0647	2.08349	69.6958	1.22e-11	5.25e-09	Treg_IK_StimVSTreg_WT_Stim	ENSMUST00000158108	U1.184-201
OCR_3585	chr1	91836236	91836801	-2.32627	2.02047	75.4507	1.25e-11	5.35e-09	Treg_IK_StimVSTreg_WT_Stim	ENSMUST00000036954	Gbx2-001
OCR_639	chr1	21509774	21511008	1.17437	4.55049	69.4427	1.3e-11	5.45e-09	Treg_IK_StimVSTreg_WT_Stim	ENSMUST00000119064	Gm7658-001
OCR_87863	chr5	102909977	102911561	-1.0176	5.07001	69.456	1.29e-11	5.45e-09	Treg_IK_StimVSTreg_WT_Stim	ENSMUST00000094559	Arhgap24-001
OCR_71533	chr3	55586212	55588369	-1.18078	4.73945	72.6371	1.34e-11	5.61e-09	Treg_IK_StimVSTreg_WT_Stim	ENSMUST00000075422	Mab21l1-201
OCR_87323	chr5	90311016	90312980	-1.13551	5.03707	74.8341	1.4e-11	5.76e-09	Treg_IK_StimVSTreg_WT_Stim	ENSMUST00000061427	Adamts3-202
OCR_109193	chr8	95030779	95031226	-2.50122	2.02639	73.4357	1.4e-11	5.76e-09	Treg_IK_StimVSTreg_WT_Stim	ENSMUST00000034184	Irx5-001
OCR_43789	chr16	7767749	7768954	-1.63199	3.61362	81.0341	1.44e-11	5.9e-09	Treg_IK_StimVSTreg_WT_Stim	ENSMUST00000158881	7SK.319-201
OCR_74275	chr3	117277996	117279577	-1.37642	3.15986	68.9594	1.45e-11	5.9e-09	Treg_IK_StimVSTreg_WT_Stim	ENSMUST00000106473	4833424O15Rik-002
OCR_83235	chr4	145742190	145744037	-1.22925	4.93669	86.916	1.53e-11	6.18e-09	Treg_IK_StimVSTreg_WT_Stim	ENSMUST00000105733	Gm13251-001
OCR_91475	chr6	15739904	15740482	1.12085	5.16407	68.758	1.55e-11	6.2e-09	Treg_IK_StimVSTreg_WT_Stim	ENSMUST00000128849	Mdfic-005
OCR_103120	chr7	116164223	116165632	-1.21996	4.07276	68.6521	1.56e-11	6.22e-09	Treg_IK_StimVSTreg_WT_Stim	ENSMUST00000119474	Tub-002
OCR_27504	chr13	7310002	7311122	-1.73308	2.48528	68.5717	1.59e-11	6.3e-09	Treg_IK_StimVSTreg_WT_Stim	ENSMUST00000102452	CT010465.1-201
OCR_74723	chr3	129361130	129362259	1.10852	5.30813	69.1532	1.6e-11	6.3e-09	Treg_IK_StimVSTreg_WT_Stim	ENSMUST00000174960	AC098732.1-201
OCR_43905	chr16	9477388	9478392	-2.05678	2.36256	75.8409	1.65e-11	6.38e-09	Treg_IK_StimVSTreg_WT_Stim	ENSMUST00000165260	Gm17697-201
OCR_84259	chr5	9059084	9059653	1.43094	4.18858	68.4458	1.77e-11	6.82e-09	Treg_IK_StimVSTreg_WT_Stim	ENSMUST00000115365	4930420K17Rik-201
OCR_25481	chr12	91050056	91051257	-1.51185	3.24542	69.2335	1.79e-11	6.85e-09	Treg_IK_StimVSTreg_WT_Stim	ENSMUST00000110133	Nrxn3-010
OCR_72336	chr3	80174725	80175563	-1.82219	2.21828	67.9481	1.85e-11	6.86e-09	Treg_IK_StimVSTreg_WT_Stim	ENSMUST00000145087	Gm6706-001
OCR_80138	chr4	91037805	91038886	-1.51339	2.90336	68.0237	1.82e-11	6.86e-09	Treg_IK_StimVSTreg_WT_Stim	ENSMUST00000176362	Elavl2-015
OCR_112458	chr9	32708743	32709423	-2.11019	2.33405	67.9476	1.85e-11	6.86e-09	Treg_IK_StimVSTreg_WT_Stim	ENSMUST00000034534	Ets1-201
OCR_74891	chr3	132453892	132454855	1.20827	4.79823	68.7022	1.94e-11	7.1e-09	Treg_IK_StimVSTreg_WT_Stim	ENSMUST00000157151	SNORA17.334-201
OCR_77705	chr4	30632202	30633742	-1.35777	3.0687	67.5986	2.01e-11	7.31e-09	Treg_IK_StimVSTreg_WT_Stim	ENSMUST00000118491	Gm11920-001
OCR_100752	chr7	65401941	65403628	-1.38571	3.36383	67.5714	2.02e-11	7.31e-09	Treg_IK_StimVSTreg_WT_Stim	ENSMUST00000104168	SNORA17.114-201
OCR_30527	chr13	71701067	71701969	-1.81007	2.19662	67.527	2.04e-11	7.34e-09	Treg_IK_StimVSTreg_WT_Stim	ENSMUST00000077337	Irx1-001
OCR_93644	chr6	65543778	65544620	1.09243	4.86632	67.4789	2.06e-11	7.38e-09	Treg_IK_StimVSTreg_WT_Stim	ENSMUST00000053641	Tnip3-201
OCR_11461	chr10	53974603	53975542	1.01837	5.40417	67.6985	2.17e-11	7.57e-09	Treg_IK_StimVSTreg_WT_Stim	ENSMUST00000082709	U6.82-201
OCR_12241	chr10	68768828	68770495	-1.46827	3.57372	70.4064	2.14e-11	7.57e-09	Treg_IK_StimVSTreg_WT_Stim	ENSMUST00000165765	Rhobtb1-013
OCR_63402	chr2	69956417	69957661	1.19504	4.7916	67.2716	2.17e-11	7.57e-09	Treg_IK_StimVSTreg_WT_Stim	ENSMUST00000112241	Myo3b-001
OCR_104765	chr7	144068965	144069802	-2.0036	2.20912	69.0518	2.15e-11	7.57e-09	Treg_IK_StimVSTreg_WT_Stim	ENSMUST00000081510	Mgmt-201
OCR_227	chr1	11087370	11088161	-2.00156	2.81238	75.7986	2.21e-11	7.66e-09	Treg_IK_StimVSTreg_WT_Stim	ENSMUST00000104130	SNORA40.1-201
OCR_45985	chr16	48678066	48678680	1.18549	4.64657	66.9706	2.33e-11	8e-09	Treg_IK_StimVSTreg_WT_Stim	ENSMUST00000170861	Trat1-203
OCR_48940	chr17	13737022	13738090	-1.12526	4.84374	73.9327	2.37e-11	8.05e-09	Treg_IK_StimVSTreg_WT_Stim	ENSMUST00000137459	Tcte2-007
OCR_73422	chr3	98744892	98745931	-1.57166	2.73365	66.9142	2.36e-11	8.05e-09	Treg_IK_StimVSTreg_WT_Stim	ENSMUST00000155540	5730437C11Rik-001
OCR_62944	chr2	60715664	60716524	1.14546	4.71444	66.7627	2.45e-11	8.14e-09	Treg_IK_StimVSTreg_WT_Stim	ENSMUST00000164147	Rbms1-202
OCR_71050	chr3	41485657	41486410	1.41991	4.3679	69.5035	2.43e-11	8.14e-09	Treg_IK_StimVSTreg_WT_Stim	ENSMUST00000140373	Sclt1-006
OCR_83233	chr4	145741261	145741629	-1.59545	2.66569	66.7542	2.46e-11	8.14e-09	Treg_IK_StimVSTreg_WT_Stim	ENSMUST00000105733	Gm13251-001
OCR_104633	chr7	142187454	142188022	-2.06041	2.03957	67.0694	2.52e-11	8.29e-09	Treg_IK_StimVSTreg_WT_Stim	ENSMUST00000171394	Fam196a-202
OCR_76542	chr3	156874388	156875311	-1.54508	2.75076	66.5981	2.55e-11	8.36e-09	Treg_IK_StimVSTreg_WT_Stim	ENSMUST00000104393	SNORA17.219-201
OCR_23320	chr12	36763149	36763917	1.27043	4.36769	66.52	2.6e-11	8.47e-09	Treg_IK_StimVSTreg_WT_Stim	ENSMUST00000138393	Tspan13-002
OCR_14508	chr10	107378005	107379060	1.09009	5.08128	66.4831	2.62e-11	8.5e-09	Treg_IK_StimVSTreg_WT_Stim	ENSMUST00000165341	Otogl-201
OCR_57431	chr18	89402810	89403696	1.18038	4.53311	66.7113	2.74e-11	8.7e-09	Treg_IK_StimVSTreg_WT_Stim	ENSMUST00000166314	Cd226-201
OCR_93629	chr6	65414970	65415848	1.3179	4.47417	69.1495	2.97e-11	9.26e-09	Treg_IK_StimVSTreg_WT_Stim	ENSMUST00000136016	C130060K24Rik-002
OCR_38743	chr15	5708359	5709380	1.28346	4.03544	65.7642	3.12e-11	9.64e-09	Treg_IK_StimVSTreg_WT_Stim	ENSMUST00000104217	SNORA17.133-201
OCR_40778	chr15	59559689	59560315	1.2671	4.31016	65.658	3.2e-11	9.84e-09	Treg_IK_StimVSTreg_WT_Stim	ENSMUST00000118228	Trib1-002
OCR_8379	chr1	191167299	191168071	-2.05331	2.51997	77.019	3.31e-11	1.01e-08	Treg_IK_StimVSTreg_WT_Stim	ENSMUST00000110920	Kcnk2-202
OCR_83252	chr4	146609016	146610461	-1.23452	3.51337	65.4989	3.33e-11	1.01e-08	Treg_IK_StimVSTreg_WT_Stim	ENSMUST00000125785	Gm13147-002
OCR_63950	chr2	78801685	78802341	1.18597	4.87178	68.6629	3.52e-11	1.05e-08	Treg_IK_StimVSTreg_WT_Stim	ENSMUST00000153266	Ube2e3-005
OCR_57012	chr18	81765070	81766185	-1.32555	3.60357	65.2388	3.54e-11	1.05e-08	Treg_IK_StimVSTreg_WT_Stim	ENSMUST00000104411	SNORA17.230-201
OCR_100087	chr7	47235237	47236290	-1.6791	2.45072	65.1541	3.62e-11	1.06e-08	Treg_IK_StimVSTreg_WT_Stim	ENSMUST00000155574	Gm6851-002
OCR_3864	chr1	96447847	96448646	-1.83078	2.31514	64.6482	4.09e-11	1.19e-08	Treg_IK_StimVSTreg_WT_Stim	ENSMUST00000104225	SNORD30.2-201
OCR_80037	chr4	88406381	88406685	1.61937	3.52429	64.6438	4.1e-11	1.19e-08	Treg_IK_StimVSTreg_WT_Stim	ENSMUST00000107140	Gm13283-001
OCR_55715	chr18	60370934	60371860	1.42777	3.58639	64.6051	4.14e-11	1.19e-08	Treg_IK_StimVSTreg_WT_Stim	ENSMUST00000031549	Gm4951-001
OCR_32391	chr13	106011908	106013079	-1.63912	3.05051	71.3237	4.2e-11	1.2e-08	Treg_IK_StimVSTreg_WT_Stim	ENSMUST00000104390	SNORA17.217-201
OCR_80193	chr4	93245974	93247271	-1.55807	2.95304	66.4674	4.28e-11	1.22e-08	Treg_IK_StimVSTreg_WT_Stim	ENSMUST00000120097	Gm12640-001
OCR_13345	chr10	85758504	85759363	-1.49213	3.25494	64.3937	4.36e-11	1.23e-08	Treg_IK_StimVSTreg_WT_Stim	ENSMUST00000020234	Timp3-001
OCR_77118	chr4	10594243	10595405	-1.77177	2.44549	65.431	4.32e-11	1.23e-08	Treg_IK_StimVSTreg_WT_Stim	ENSMUST00000145856	1700123O12Rik-004
OCR_93845	chr6	68051533	68052760	-1.56701	2.66726	64.4036	4.35e-11	1.23e-08	Treg_IK_StimVSTreg_WT_Stim	ENSMUST00000103317	Igkv1-117-201
OCR_12025	chr10	65946618	65947497	-1.80396	2.30412	64.2874	4.53e-11	1.27e-08	Treg_IK_StimVSTreg_WT_Stim	ENSMUST00000104251	SNORA17.149-201
OCR_3420	chr1	90116897	90117617	-1.17209	3.88251	64.2247	4.75e-11	1.32e-08	Treg_IK_StimVSTreg_WT_Stim	ENSMUST00000173165	Gm20528-001
OCR_64856	chr2	102796680	102797642	1.08096	4.94246	64.0158	4.78e-11	1.32e-08	Treg_IK_StimVSTreg_WT_Stim	ENSMUST00000111194	Cd44-202
OCR_28449	chr13	25654550	25655785	-1.57313	2.91479	64.3247	4.87e-11	1.34e-08	Treg_IK_StimVSTreg_WT_Stim	ENSMUST00000122209	Gm11349-001
OCR_91603	chr6	18463977	18465236	-1.36579	3.14121	63.8985	4.92e-11	1.35e-08	Treg_IK_StimVSTreg_WT_Stim	ENSMUST00000148602	Cttnbp2-001
OCR_40874	chr15	62021118	62022299	1.00586	5.11048	63.8511	4.98e-11	1.36e-08	Treg_IK_StimVSTreg_WT_Stim	ENSMUST00000151919	H2afy3-001
OCR_3429	chr1	90142598	90142983	-1.22601	3.52149	63.7621	5.09e-11	1.36e-08	Treg_IK_StimVSTreg_WT_Stim	ENSMUST00000142632	Heatr7b1-004
OCR_38638	chr14	124591134	124592421	-1.47047	3.09765	64.6262	5.06e-11	1.36e-08	Treg_IK_StimVSTreg_WT_Stim	ENSMUST00000026631	Fgf14-001
OCR_51639	chr17	65103306	65104150	1.06382	4.98038	63.8145	5.02e-11	1.36e-08	Treg_IK_StimVSTreg_WT_Stim	ENSMUST00000170636	Gm17133-001
OCR_75922	chr3	148425185	148426437	-1.3388	3.86534	64.6442	5.13e-11	1.36e-08	Treg_IK_StimVSTreg_WT_Stim	ENSMUST00000168352	Lphn2-205
OCR_32401	chr13	106083733	106084941	-1.2709	3.87698	63.5117	5.41e-11	1.42e-08	Treg_IK_StimVSTreg_WT_Stim	ENSMUST00000062286	Rnf180-202
OCR_81157	chr4	114196417	114197208	-1.92143	2.37642	67.814	5.41e-11	1.42e-08	Treg_IK_StimVSTreg_WT_Stim	ENSMUST00000094894	Gm12824-001
OCR_52540	chr17	80567073	80568052	1.12861	4.85722	63.8767	5.44e-11	1.42e-08	Treg_IK_StimVSTreg_WT_Stim	ENSMUST00000133955	Galm-002
OCR_97130	chr6	130162144	130162872	-1.87752	2.20785	63.4365	5.51e-11	1.43e-08	Treg_IK_StimVSTreg_WT_Stim	ENSMUST00000112012	Klra7-201
OCR_102257	chr7	96665542	96666546	-1.5986	2.63994	63.4054	5.56e-11	1.43e-08	Treg_IK_StimVSTreg_WT_Stim	ENSMUST00000041761	Prss23-201
OCR_77908	chr4	33682035	33683161	-1.63753	3.09308	63.3183	5.68e-11	1.45e-08	Treg_IK_StimVSTreg_WT_Stim	ENSMUST00000121474	Gm12398-001
OCR_37811	chr14	105897905	105899338	-1.31143	3.34008	63.2649	5.75e-11	1.46e-08	Treg_IK_StimVSTreg_WT_Stim	ENSMUST00000022711	4930449E01Rik-201
OCR_80382	chr4	97527449	97528320	1.08167	4.79749	63.2422	5.79e-11	1.46e-08	Treg_IK_StimVSTreg_WT_Stim	ENSMUST00000148930	Nfia-007
OCR_2479	chr1	69590537	69591221	1.05934	5.05571	63.1956	5.85e-11	1.47e-08	Treg_IK_StimVSTreg_WT_Stim	ENSMUST00000027146	Ikzf2-201
OCR_30606	chr13	72857992	72858663	-1.95792	2.09367	65.0148	5.93e-11	1.49e-08	Treg_IK_StimVSTreg_WT_Stim	ENSMUST00000172353	Irx2-007
OCR_86867	chr5	74744201	74745124	1.39741	4.26688	64.7446	6.14e-11	1.53e-08	Treg_IK_StimVSTreg_WT_Stim	ENSMUST00000121681	Gm15982-001
OCR_23701	chr12	46174639	46175655	-1.55794	2.7848	63.5023	6.27e-11	1.56e-08	Treg_IK_StimVSTreg_WT_Stim	ENSMUST00000120531	Stxbp6-002
OCR_83272	chr4	146775483	146776628	-1.15603	3.78931	62.8931	6.31e-11	1.56e-08	Treg_IK_StimVSTreg_WT_Stim	ENSMUST00000121570	Gm8178-001
OCR_44895	chr16	26371312	26372143	-1.59177	2.87571	62.9602	6.43e-11	1.58e-08	Treg_IK_StimVSTreg_WT_Stim	ENSMUST00000023154	Cldn1-001
OCR_27848	chr13	12981719	12982347	-1.4993	2.70722	62.7796	6.49e-11	1.58e-08	Treg_IK_StimVSTreg_WT_Stim	ENSMUST00000099805	Prl2c3-201
OCR_16533	chr11	12364917	12365659	-2.03483	1.98292	65.0199	6.78e-11	1.64e-08	Treg_IK_StimVSTreg_WT_Stim	ENSMUST00000046755	Cobl-001
OCR_87271	chr5	89550150	89550875	-1.93152	2.00964	62.5071	6.94e-11	1.67e-08	Treg_IK_StimVSTreg_WT_Stim	ENSMUST00000134303	Slc4a4-008
OCR_36396	chr14	69902186	69903502	1.12948	6.88036	93.4396	7.06e-11	1.69e-08	Treg_IK_StimVSTreg_WT_Stim	ENSMUST00000037064	Slc25a37-201
OCR_33832	chr14	17603156	17603750	-2.11151	2.00661	66.7007	7.13e-11	1.7e-08	Treg_IK_StimVSTreg_WT_Stim	ENSMUST00000037779	Rarb-201
OCR_22198	chr12	12587258	12588052	-1.77964	3.13943	71.6307	7.27e-11	1.73e-08	Treg_IK_StimVSTreg_WT_Stim	ENSMUST00000101943	U6.473-201
OCR_38938	chr15	9459274	9459777	1.26865	4.50924	62.4782	7.63e-11	1.79e-08	Treg_IK_StimVSTreg_WT_Stim	ENSMUST00000003981	Il7r-201
OCR_87274	chr5	89576235	89577001	-1.95076	2.35524	63.2235	7.6e-11	1.79e-08	Treg_IK_StimVSTreg_WT_Stim	ENSMUST00000134303	Slc4a4-008
OCR_70523	chr3	31208308	31209360	-1.74833	2.34562	62.8901	7.79e-11	1.82e-08	Treg_IK_StimVSTreg_WT_Stim	ENSMUST00000091259	Slc7a14-001
OCR_5744	chr1	145700711	145701700	1.05223	5.3046	64.3668	8.03e-11	1.85e-08	Treg_IK_StimVSTreg_WT_Stim	ENSMUST00000157698	snoU109.2-201
OCR_64651	chr2	94773464	94774524	-1.61259	2.52505	61.925	8.03e-11	1.85e-08	Treg_IK_StimVSTreg_WT_Stim	ENSMUST00000104093	SNORA17.77-201
OCR_75866	chr3	148006627	148007477	-1.77836	2.50829	61.9451	7.99e-11	1.85e-08	Treg_IK_StimVSTreg_WT_Stim	ENSMUST00000104253	SNORA17.150-201
OCR_83105	chr4	143993801	143994906	-1.70991	2.97712	68.9926	8.21e-11	1.88e-08	Treg_IK_StimVSTreg_WT_Stim	ENSMUST00000133334	D530049N12Rik-001
OCR_30590	chr13	72729615	72730220	-2.10079	1.92411	66.9175	8.4e-11	1.91e-08	Treg_IK_StimVSTreg_WT_Stim	ENSMUST00000177421	Gm20554-001
OCR_69611	chr3	8246235	8246638	-1.63355	2.48738	61.7471	8.4e-11	1.91e-08	Treg_IK_StimVSTreg_WT_Stim	ENSMUST00000060110	Gm7103-201
OCR_63128	chr2	64999264	65000390	1.13673	4.88812	62.8471	8.64e-11	1.95e-08	Treg_IK_StimVSTreg_WT_Stim	ENSMUST00000155768	Cobll1-012
OCR_87165	chr5	86495604	86495939	1.12465	4.82244	61.6175	8.67e-11	1.95e-08	Treg_IK_StimVSTreg_WT_Stim	ENSMUST00000031170	Cenpc1-201
OCR_74267	chr3	117025048	117025941	-1.72509	2.39047	61.7185	9.08e-11	2.03e-08	Treg_IK_StimVSTreg_WT_Stim	ENSMUST00000174925	AC165162.1-201
OCR_75411	chr3	141624164	141624984	-1.81115	2.26716	61.306	9.38e-11	2.09e-08	Treg_IK_StimVSTreg_WT_Stim	ENSMUST00000029948	Bmpr1b-001
OCR_37218	chr14	88114323	88115387	-1.46189	2.67307	61.2425	9.53e-11	2.12e-08	Treg_IK_StimVSTreg_WT_Stim	ENSMUST00000163714	Tdrd3-005
OCR_14811	chr10	114237744	114239166	-1.2697	3.11773	61.2083	9.61e-11	2.13e-08	Treg_IK_StimVSTreg_WT_Stim	ENSMUST00000061632	Trhde-001
OCR_111604	chr9	13505966	13506646	1.20362	4.49862	62.1643	9.75e-11	2.15e-08	Treg_IK_StimVSTreg_WT_Stim	ENSMUST00000161245	Maml2-002
OCR_5810	chr1	146184447	146185236	1.17587	4.40745	61.1291	9.81e-11	2.16e-08	Treg_IK_StimVSTreg_WT_Stim	ENSMUST00000172388	Rgs1-001
OCR_63331	chr2	68797582	68798631	-1.13236	4.4179	61.1142	9.84e-11	2.16e-08	Treg_IK_StimVSTreg_WT_Stim	ENSMUST00000141498	Lass6-003
OCR_10051	chr10	23068764	23069663	-1.73152	2.38237	61.1488	1.02e-10	2.23e-08	Treg_IK_StimVSTreg_WT_Stim	ENSMUST00000074366	Eya4-201
OCR_60123	chr2	6616444	6617136	1.21093	4.53027	61.0094	1.02e-10	2.23e-08	Treg_IK_StimVSTreg_WT_Stim	ENSMUST00000002176	Celf2-001
OCR_12057	chr10	66563537	66563876	1.37141	4.19516	60.7761	1.07e-10	2.32e-08	Treg_IK_StimVSTreg_WT_Stim	ENSMUST00000020023	Reep3-201
OCR_60637	chr2	17018969	17019689	-1.89865	2.1056	61.7943	1.08e-10	2.33e-08	Treg_IK_StimVSTreg_WT_Stim	ENSMUST00000118746	Gm13325-001
OCR_106968	chr8	41507337	41507998	1.16515	4.95373	63.283	1.11e-10	2.39e-08	Treg_IK_StimVSTreg_WT_Stim	ENSMUST00000049389	Zdhhc2-001
OCR_19846	chr11	92758190	92759040	-1.91737	2.08149	60.5893	1.14e-10	2.43e-08	Treg_IK_StimVSTreg_WT_Stim	ENSMUST00000157185	SNORA48.5-201
OCR_34974	chr14	36851252	36852271	-1.89372	2.30488	64.9214	1.16e-10	2.47e-08	Treg_IK_StimVSTreg_WT_Stim	ENSMUST00000100708	Gm7853-201
OCR_44461	chr16	18733097	18734217	1.0038	5.28358	60.5438	1.2e-10	2.53e-08	Treg_IK_StimVSTreg_WT_Stim	ENSMUST00000043577	Cldn5-201
OCR_105568	chr8	9233206	9233793	-1.6325	2.80657	60.6242	1.21e-10	2.53e-08	Treg_IK_StimVSTreg_WT_Stim	ENSMUST00000082684	n-R5s95-201
OCR_111684	chr9	14190102	14190558	1.67749	3.24385	60.3095	1.21e-10	2.53e-08	Treg_IK_StimVSTreg_WT_Stim	ENSMUST00000163822	Endod1-202
OCR_65485	chr2	115678127	115678856	-1.65045	2.46126	60.2736	1.22e-10	2.54e-08	Treg_IK_StimVSTreg_WT_Stim	ENSMUST00000177493	Meis2-019
OCR_96951	chr6	127984353	127986366	-1.08497	4.23544	60.2264	1.23e-10	2.57e-08	Treg_IK_StimVSTreg_WT_Stim	ENSMUST00000123786	Tspan9-009
OCR_16522	chr11	12190982	12191883	-1.61786	2.75178	60.1442	1.26e-10	2.61e-08	Treg_IK_StimVSTreg_WT_Stim	ENSMUST00000153794	Gm12002-001
OCR_30796	chr13	75969613	75970677	1.28173	3.99866	59.9985	1.31e-10	2.68e-08	Treg_IK_StimVSTreg_WT_Stim	ENSMUST00000022082	Glrx-001
OCR_33574	chr14	13440913	13441437	-2.0272	1.95413	62.4388	1.33e-10	2.71e-08	Treg_IK_StimVSTreg_WT_Stim	ENSMUST00000122592	n-R5s45-201
OCR_92080	chr6	31274699	31275305	1.2306	4.47712	59.8746	1.35e-10	2.75e-08	Treg_IK_StimVSTreg_WT_Stim	ENSMUST00000124811	2210408F21Rik-006
OCR_45800	chr16	45124310	45125504	1.0272	5.27488	60.4568	1.36e-10	2.76e-08	Treg_IK_StimVSTreg_WT_Stim	ENSMUST00000152364	Slc35a5-003
OCR_16739	chr11	20377188	20378041	1.02258	5.15384	59.793	1.38e-10	2.78e-08	Treg_IK_StimVSTreg_WT_Stim	ENSMUST00000119032	Gm12034-001
OCR_105529	chr8	8488496	8489303	-1.70206	2.37553	59.7007	1.41e-10	2.81e-08	Treg_IK_StimVSTreg_WT_Stim	ENSMUST00000152698	Efnb2-002
OCR_13353	chr10	85961064	85962008	-1.50531	3.0095	59.6527	1.43e-10	2.83e-08	Treg_IK_StimVSTreg_WT_Stim	ENSMUST00000120638	Syn3-001
OCR_80330	chr4	96257689	96258937	-1.42742	3.15848	59.7804	1.45e-10	2.88e-08	Treg_IK_StimVSTreg_WT_Stim	ENSMUST00000171246	Cyp2j9-201
OCR_48294	chr16	98182304	98183058	1.00566	5.00759	59.5363	1.47e-10	2.89e-08	Treg_IK_StimVSTreg_WT_Stim	ENSMUST00000052089	Zfp295-201
OCR_24081	chr12	58785862	58786639	-1.91125	2.08831	61.0622	1.47e-10	2.89e-08	Treg_IK_StimVSTreg_WT_Stim	ENSMUST00000061000	Ttc6-201
OCR_107274	chr8	49640353	49641492	-1.53385	2.89565	62.1822	1.5e-10	2.92e-08	Treg_IK_StimVSTreg_WT_Stim	ENSMUST00000110346	Odz3-002
OCR_71824	chr3	63099087	63100239	-1.37777	2.82919	59.3587	1.54e-10	2.97e-08	Treg_IK_StimVSTreg_WT_Stim	ENSMUST00000029400	Mme-201
OCR_116168	chr9	117309048	117310075	-1.25312	3.63992	59.3158	1.55e-10	2.99e-08	Treg_IK_StimVSTreg_WT_Stim	ENSMUST00000173358	Gm20396-001
OCR_100878	chr7	69522641	69523863	-1.38415	2.91578	59.2884	1.56e-10	3e-08	Treg_IK_StimVSTreg_WT_Stim	ENSMUST00000080403	Magel2-201
OCR_31075	chr13	83413309	83414048	-1.80694	2.19172	59.2137	1.59e-10	3.04e-08	Treg_IK_StimVSTreg_WT_Stim	ENSMUST00000005722	Mef2c-201
OCR_31544	chr13	91908213	91909366	1.04104	4.95997	59.1136	1.64e-10	3.11e-08	Treg_IK_StimVSTreg_WT_Stim	ENSMUST00000159214	Acot12-003
OCR_16665	chr11	18926583	18927659	-1.42521	3.03352	59.4342	1.68e-10	3.19e-08	Treg_IK_StimVSTreg_WT_Stim	ENSMUST00000068264	Meis1-001
OCR_790	chr1	26742819	26743556	-1.25059	3.29181	58.9387	1.71e-10	3.22e-08	Treg_IK_StimVSTreg_WT_Stim	ENSMUST00000097801	4931408C20Rik-001
OCR_3456	chr1	90205519	90207304	-1.09769	4.5167	64.7614	1.77e-10	3.33e-08	Treg_IK_StimVSTreg_WT_Stim	ENSMUST00000040210	Trpm8-002
OCR_51209	chr17	53803084	53803994	1.39803	3.437	58.7063	1.82e-10	3.38e-08	Treg_IK_StimVSTreg_WT_Stim	ENSMUST00000171072	Kat2b-006
OCR_107416	chr8	58013062	58013774	-1.88323	2.26265	60.3399	1.82e-10	3.38e-08	Treg_IK_StimVSTreg_WT_Stim	ENSMUST00000171406	Gm7360-201
OCR_28453	chr13	25974571	25975714	-1.6272	2.529	59.0467	1.89e-10	3.48e-08	Treg_IK_StimVSTreg_WT_Stim	ENSMUST00000139335	Gm11351-001
OCR_86679	chr5	69731194	69733063	-1.24019	3.64114	58.8908	1.89e-10	3.48e-08	Treg_IK_StimVSTreg_WT_Stim	ENSMUST00000175388	AC107770.1-201
OCR_97402	chr6	135534647	135535366	-1.65747	2.45683	58.8903	1.89e-10	3.48e-08	Treg_IK_StimVSTreg_WT_Stim	ENSMUST00000083253	SNORA36.5-201
OCR_76621	chr3	159027040	159028273	-1.50352	2.70859	58.5021	1.91e-10	3.51e-08	Treg_IK_StimVSTreg_WT_Stim	ENSMUST00000120272	Depdc1a-001
OCR_60354	chr2	11351143	11351703	1.25481	4.39028	58.4633	1.93e-10	3.53e-08	Treg_IK_StimVSTreg_WT_Stim	ENSMUST00000117854	Gm13296-001
OCR_106230	chr8	24739221	24740083	-1.94541	2.56484	68.6761	1.94e-10	3.53e-08	Treg_IK_StimVSTreg_WT_Stim	ENSMUST00000131410	Zmat4-003
OCR_107417	chr8	58015045	58015765	-1.73505	2.51504	62.1559	1.95e-10	3.53e-08	Treg_IK_StimVSTreg_WT_Stim	ENSMUST00000171406	Gm7360-201
OCR_84560	chr5	17953454	17954511	-1.50379	2.63465	58.3026	2.02e-10	3.62e-08	Treg_IK_StimVSTreg_WT_Stim	ENSMUST00000074694	Gnai1-201
OCR_92602	chr6	41508315	41508666	1.02833	5.01214	58.305	2.01e-10	3.62e-08	Treg_IK_StimVSTreg_WT_Stim	ENSMUST00000103300	Trbv31-201
OCR_55308	chr18	52338868	52339649	-1.85396	2.32012	62.332	2.09e-10	3.73e-08	Treg_IK_StimVSTreg_WT_Stim	ENSMUST00000083316	U6.277-201
OCR_69496	chr2	181665348	181666111	-1.19463	3.84291	59.5258	2.12e-10	3.76e-08	Treg_IK_StimVSTreg_WT_Stim	ENSMUST00000119395	Gm5466-001
OCR_80415	chr4	97948558	97949724	1.07067	5.08733	59.8125	2.17e-10	3.81e-08	Treg_IK_StimVSTreg_WT_Stim	ENSMUST00000082949	Y_RNA.5-201
OCR_12232	chr10	68631015	68632161	-1.19587	3.83948	57.9142	2.23e-10	3.9e-08	Treg_IK_StimVSTreg_WT_Stim	ENSMUST00000167286	Rhobtb1-010
OCR_97418	chr6	135682734	135683309	-2.00346	1.97085	60.6192	2.25e-10	3.93e-08	Treg_IK_StimVSTreg_WT_Stim	ENSMUST00000136027	Gm14329-001
OCR_34925	chr14	35633063	35633835	-1.74461	2.18658	57.7772	2.31e-10	4.02e-08	Treg_IK_StimVSTreg_WT_Stim	ENSMUST00000043349	Grid1-001
OCR_83228	chr4	145716974	145717646	-1.23728	3.4083	57.6858	2.36e-10	4.1e-08	Treg_IK_StimVSTreg_WT_Stim	ENSMUST00000119646	Gm13245-001
OCR_8427	chr1	191619043	191620076	-1.35494	3.43764	57.6451	2.39e-10	4.12e-08	Treg_IK_StimVSTreg_WT_Stim	ENSMUST00000027899	Ptpn14-201
OCR_83263	chr4	146710768	146711984	-1.26739	3.72562	61.9155	2.43e-10	4.17e-08	Treg_IK_StimVSTreg_WT_Stim	ENSMUST00000166764	Gm13151-201
OCR_35156	chr14	44037666	44038104	-2.51004	2.17455	77.991	2.46e-10	4.21e-08	Treg_IK_StimVSTreg_WT_Stim	ENSMUST00000095918	1700001F09Rik-001
OCR_84322	chr5	12383020	12384191	-1.25977	3.27443	57.496	2.48e-10	4.22e-08	Treg_IK_StimVSTreg_WT_Stim	ENSMUST00000030868	Sema3d-201
OCR_113093	chr9	47339631	47340122	-1.84062	1.98701	57.4849	2.49e-10	4.22e-08	Treg_IK_StimVSTreg_WT_Stim	ENSMUST00000151624	Cadm1-008
OCR_3867	chr1	96489253	96490275	-1.82064	2.36131	59.707	2.5e-10	4.22e-08	Treg_IK_StimVSTreg_WT_Stim	ENSMUST00000104225	SNORD30.2-201
OCR_12124	chr10	67180090	67180999	1.14033	4.49897	58.2639	2.52e-10	4.25e-08	Treg_IK_StimVSTreg_WT_Stim	ENSMUST00000099661	Gm10797-201
OCR_47546	chr16	88204452	88205212	-1.41036	3.13475	57.3165	2.6e-10	4.36e-08	Treg_IK_StimVSTreg_WT_Stim	ENSMUST00000165675	Grik1-204
OCR_33211	chr13	120282763	120283361	-1.4081	3.59227	67.0097	2.62e-10	4.38e-08	Treg_IK_StimVSTreg_WT_Stim	ENSMUST00000099147	Gm7120-201
OCR_84383	chr5	14955938	14956580	-3.76252	2.03863	111.661	2.64e-10	4.38e-08	Treg_IK_StimVSTreg_WT_Stim	ENSMUST00000159973	Speer4e-001
OCR_71532	chr3	55584378	55584938	-1.59084	2.58997	57.2233	2.67e-10	4.38e-08	Treg_IK_StimVSTreg_WT_Stim	ENSMUST00000075422	Mab21l1-201
OCR_106129	chr8	22623071	22623989	-1.69114	2.28104	57.2256	2.67e-10	4.38e-08	Treg_IK_StimVSTreg_WT_Stim	ENSMUST00000084042	Defa20-001
OCR_6934	chr1	167539348	167540426	1.13462	4.98638	61.2443	2.68e-10	4.39e-08	Treg_IK_StimVSTreg_WT_Stim	ENSMUST00000068705	Mpzl1-201
OCR_37762	chr14	105122204	105123453	-1.39251	2.87286	57.1493	2.72e-10	4.42e-08	Treg_IK_StimVSTreg_WT_Stim	ENSMUST00000104531	SNORA17.290-201
OCR_57048	chr18	82202963	82203911	-1.25651	3.50156	57.1566	2.71e-10	4.42e-08	Treg_IK_StimVSTreg_WT_Stim	ENSMUST00000175295	Mir5127-201
OCR_100736	chr7	64845816	64847414	-1.30207	3.74937	61.2576	2.72e-10	4.42e-08	Treg_IK_StimVSTreg_WT_Stim	ENSMUST00000085240	Gabrb3-002
OCR_18530	chr11	64249050	64249950	-1.62203	2.45468	57.1091	2.75e-10	4.44e-08	Treg_IK_StimVSTreg_WT_Stim	ENSMUST00000065935	F930015N05Rik-201
OCR_100880	chr7	69563401	69565256	-1.35334	3.36032	60.4991	2.79e-10	4.5e-08	Treg_IK_StimVSTreg_WT_Stim	ENSMUST00000094340	Mkrn3-201
OCR_43659	chr16	5863367	5864049	-2.0731	2.0197	65.0644	2.81e-10	4.51e-08	Treg_IK_StimVSTreg_WT_Stim	ENSMUST00000122624	n-R5s30-201
OCR_75329	chr3	138556138	138557039	1.0905	4.98927	57.8757	2.92e-10	4.66e-08	Treg_IK_StimVSTreg_WT_Stim	ENSMUST00000121826	Tspan5-004
OCR_106134	chr8	22652249	22652988	-1.69855	2.17526	56.8411	2.95e-10	4.7e-08	Treg_IK_StimVSTreg_WT_Stim	ENSMUST00000101982	U6.481-201
OCR_40635	chr15	58025734	58027094	1.00381	5.15092	56.7093	3.05e-10	4.85e-08	Treg_IK_StimVSTreg_WT_Stim	ENSMUST00000147638	Gm15943-001
OCR_107540	chr8	62984318	62985282	-1.43541	2.95099	56.6966	3.06e-10	4.85e-08	Treg_IK_StimVSTreg_WT_Stim	ENSMUST00000079472	Aadat-201
OCR_37223	chr14	88264340	88265262	-1.54022	2.45379	56.6377	3.11e-10	4.92e-08	Treg_IK_StimVSTreg_WT_Stim	ENSMUST00000074245	Gm10119-201
OCR_39111	chr15	12360277	12361026	1.47128	3.10522	56.5941	3.14e-10	4.96e-08	Treg_IK_StimVSTreg_WT_Stim	ENSMUST00000165551	Golph3-202
OCR_87048	chr5	77801662	77802288	1.12795	4.54286	56.4576	3.26e-10	5.11e-08	Treg_IK_StimVSTreg_WT_Stim	ENSMUST00000150191	Polr2b-004
OCR_69609	chr3	8245105	8245686	-1.30606	3.41889	58.971	3.3e-10	5.17e-08	Treg_IK_StimVSTreg_WT_Stim	ENSMUST00000060110	Gm7103-201
OCR_5964	chr1	151807755	151809084	-1.56253	3.56229	63.1339	3.35e-10	5.2e-08	Treg_IK_StimVSTreg_WT_Stim	ENSMUST00000134676	Pla2g4a-005
OCR_7076	chr1	169567049	169567601	-1.71613	2.58733	57.1985	3.39e-10	5.24e-08	Treg_IK_StimVSTreg_WT_Stim	ENSMUST00000111380	Rxrg-004
OCR_26925	chr12	115801168	115802248	-1.59006	2.53226	56.2689	3.42e-10	5.24e-08	Treg_IK_StimVSTreg_WT_Stim	ENSMUST00000103497	Ighv15-2-201
OCR_46556	chr16	58703449	58703814	1.19185	4.22946	56.2565	3.43e-10	5.24e-08	Treg_IK_StimVSTreg_WT_Stim	ENSMUST00000089318	Gpr15-201
OCR_46624	chr16	60604503	60606405	-1.25773	3.58329	58.4184	3.42e-10	5.24e-08	Treg_IK_StimVSTreg_WT_Stim	ENSMUST00000160040	Gm9017-001
OCR_118470	chrX	160450928	160451892	1.27466	4.27885	56.2677	3.43e-10	5.24e-08	Treg_IK_StimVSTreg_WT_Stim	ENSMUST00000126650	Car5b-002
OCR_2925	chr1	78213058	78214453	-1.37545	3.15395	56.8064	3.5e-10	5.27e-08	Treg_IK_StimVSTreg_WT_Stim	ENSMUST00000087086	Pax3-001
OCR_8793	chr1	196048865	196049626	-1.5233	2.99952	57.1968	3.49e-10	5.27e-08	Treg_IK_StimVSTreg_WT_Stim	ENSMUST00000027952	Plxna2-001
OCR_22942	chr12	30787580	30788403	-2.00715	2.23633	64.6511	3.51e-10	5.27e-08	Treg_IK_StimVSTreg_WT_Stim	ENSMUST00000140875	Tpo-003
OCR_23747	chr12	50485519	50486813	-1.41779	2.97589	57.1113	3.49e-10	5.27e-08	Treg_IK_StimVSTreg_WT_Stim	ENSMUST00000110746	3110039M20Rik-001
OCR_57325	chr18	85866948	85867753	-1.16404	3.46339	56.1782	3.51e-10	5.27e-08	Treg_IK_StimVSTreg_WT_Stim	ENSMUST00000082733	U6.90-201
OCR_62269	chr2	48328543	48329419	1.02483	4.63235	56.1771	3.51e-10	5.27e-08	Treg_IK_StimVSTreg_WT_Stim	ENSMUST00000127672	Gm13481-001
OCR_2355	chr1	65596572	65597501	-1.70845	2.34471	56.6468	3.55e-10	5.31e-08	Treg_IK_StimVSTreg_WT_Stim	ENSMUST00000120125	Gm5255-001
OCR_44930	chr16	27349129	27349995	1.03203	4.63836	56.1244	3.56e-10	5.31e-08	Treg_IK_StimVSTreg_WT_Stim	ENSMUST00000160623	Gm15970-001
OCR_76391	chr3	154768566	154769327	-1.77631	2.13951	56.0147	3.66e-10	5.46e-08	Treg_IK_StimVSTreg_WT_Stim	ENSMUST00000163510	Lrriq3-203
OCR_23567	chr12	42073961	42075090	-1.43114	2.97581	56.2462	3.7e-10	5.46e-08	Treg_IK_StimVSTreg_WT_Stim	ENSMUST00000104425	SNORA17.238-201
OCR_54981	chr18	43552247	43552941	-1.59938	2.53854	55.9781	3.7e-10	5.46e-08	Treg_IK_StimVSTreg_WT_Stim	ENSMUST00000025379	Dpysl3-002
OCR_55571	chr18	56893393	56894082	1.01509	5.66155	58.8455	3.69e-10	5.46e-08	Treg_IK_StimVSTreg_WT_Stim	ENSMUST00000128651	Lmnb1-002
OCR_101332	chr7	78850170	78851006	-1.6706	2.25031	55.9927	3.68e-10	5.46e-08	Treg_IK_StimVSTreg_WT_Stim	ENSMUST00000094315	Gm10295-201
OCR_115442	chr9	102256668	102257559	-1.51126	3.37789	63.304	3.71e-10	5.46e-08	Treg_IK_StimVSTreg_WT_Stim	ENSMUST00000035129	Ephb1-001
OCR_59219	chr19	45724451	45724775	-1.69069	2.49272	59.3378	3.72e-10	5.47e-08	Treg_IK_StimVSTreg_WT_Stim	ENSMUST00000159590	Fbxw4-003
OCR_52333	chr17	75960295	75961090	-1.93435	2.16726	58.8976	3.78e-10	5.54e-08	Treg_IK_StimVSTreg_WT_Stim	ENSMUST00000112507	Fam98a-001
OCR_11891	chr10	61429988	61430964	-1.59445	2.50358	56.485	3.85e-10	5.61e-08	Treg_IK_StimVSTreg_WT_Stim	ENSMUST00000051826	Col13a1-002
OCR_87891	chr5	103303552	103304358	-1.62597	2.63629	55.8203	3.94e-10	5.73e-08	Treg_IK_StimVSTreg_WT_Stim	ENSMUST00000112849	Arhgap24-202
OCR_48189	chr16	97311563	97312322	-2.0413	2.08691	59.0526	4.02e-10	5.83e-08	Treg_IK_StimVSTreg_WT_Stim	ENSMUST00000056102	Dscam-001
OCR_104617	chr7	142050327	142051061	-2.1272	2.1511	66.9446	4.03e-10	5.83e-08	Treg_IK_StimVSTreg_WT_Stim	ENSMUST00000097984	Fam196a-201
OCR_9227	chr10	8740103	8740890	-1.83522	2.12555	55.5948	4.09e-10	5.84e-08	Treg_IK_StimVSTreg_WT_Stim	ENSMUST00000015449	Sash1-201
OCR_22500	chr12	17756931	17757972	1.17306	4.27467	55.5801	4.1e-10	5.84e-08	Treg_IK_StimVSTreg_WT_Stim	ENSMUST00000071858	Hpcal1-201
OCR_30547	chr13	72100414	72101058	-1.88073	2.32453	62.6804	4.1e-10	5.84e-08	Treg_IK_StimVSTreg_WT_Stim	ENSMUST00000077337	Irx1-001
OCR_34180	chr14	23067330	23068161	-1.90964	2.09191	58.8749	4.1e-10	5.84e-08	Treg_IK_StimVSTreg_WT_Stim	ENSMUST00000159107	1700112E06Rik-005
OCR_95479	chr6	101471274	101471895	-1.76838	2.1578	55.6676	4.05e-10	5.84e-08	Treg_IK_StimVSTreg_WT_Stim	ENSMUST00000075994	Pdzrn3-001
OCR_76074	chr3	150980376	150981174	-1.71543	2.22887	55.7678	4.17e-10	5.89e-08	Treg_IK_StimVSTreg_WT_Stim	ENSMUST00000046977	Eltd1-001
OCR_89843	chr5	134729104	134729994	-1.3664	3.22915	55.5332	4.16e-10	5.89e-08	Treg_IK_StimVSTreg_WT_Stim	ENSMUST00000174003	Gtf2i-020
OCR_4262	chr1	109451937	109452820	-1.82754	2.23368	57.6958	4.18e-10	5.89e-08	Treg_IK_StimVSTreg_WT_Stim	ENSMUST00000173667	Serpinb10-ps-001
OCR_13404	chr10	86955309	86956048	-1.92664	2.22508	58.081	4.19e-10	5.89e-08	Treg_IK_StimVSTreg_WT_Stim	ENSMUST00000020243	Ascl1-001
OCR_72367	chr3	80725122	80726057	-1.61226	2.68064	59.0972	4.22e-10	5.92e-08	Treg_IK_StimVSTreg_WT_Stim	ENSMUST00000169147	Gm17731-201
OCR_80335	chr4	96324109	96325001	-1.78507	2.14827	55.6493	4.23e-10	5.92e-08	Treg_IK_StimVSTreg_WT_Stim	ENSMUST00000030299	Cyp2j5-001
OCR_27976	chr13	15937412	15938781	-1.36132	3.58437	58.6717	4.3e-10	6e-08	Treg_IK_StimVSTreg_WT_Stim	ENSMUST00000166941	Gm17394-201
OCR_94985	chr6	93666792	93667666	-1.71381	2.45045	56.0872	4.3e-10	6e-08	Treg_IK_StimVSTreg_WT_Stim	ENSMUST00000158002	U6.748-201
OCR_82682	chr4	136391420	136392582	-1.36395	3.41766	57.0238	4.34e-10	6.03e-08	Treg_IK_StimVSTreg_WT_Stim	ENSMUST00000105846	Ephb2-003
OCR_86705	chr5	72294472	72295393	-1.55181	3.35667	55.8013	4.35e-10	6.03e-08	Treg_IK_StimVSTreg_WT_Stim	ENSMUST00000118973	Gm15617-001
OCR_31319	chr13	88960968	88962353	-1.27172	3.37191	55.3047	4.41e-10	6.09e-08	Treg_IK_StimVSTreg_WT_Stim	ENSMUST00000118731	Edil3-008
OCR_32265	chr13	104123648	104124850	-1.34621	3.40802	56.5765	4.42e-10	6.09e-08	Treg_IK_StimVSTreg_WT_Stim	ENSMUST00000166726	Mast4-003
OCR_62531	chr2	51374719	51375584	-2.02206	2.06886	60.5787	4.42e-10	6.09e-08	Treg_IK_StimVSTreg_WT_Stim	ENSMUST00000120828	Gm13494-001
OCR_26909	chr12	115531042	115532206	-1.50364	2.72146	56.1579	4.45e-10	6.11e-08	Treg_IK_StimVSTreg_WT_Stim	ENSMUST00000103481	Ighv3-6-201
OCR_45699	chr16	43701912	43702578	1.13712	4.23639	55.2427	4.49e-10	6.14e-08	Treg_IK_StimVSTreg_WT_Stim	ENSMUST00000096065	Tigit-201
OCR_27125	chr12	118390880	118391450	-2.06639	2.14999	64.1671	4.54e-10	6.2e-08	Treg_IK_StimVSTreg_WT_Stim	ENSMUST00000083604	Mir153-201
OCR_431	chr1	15276372	15277337	-1.83663	2.62453	65.304	4.57e-10	6.21e-08	Treg_IK_StimVSTreg_WT_Stim	ENSMUST00000175681	Kcnb2-001
OCR_84180	chr5	7343950	7345374	-1.43562	2.96146	55.9097	4.6e-10	6.22e-08	Treg_IK_StimVSTreg_WT_Stim	ENSMUST00000159546	4921511H03Rik-002
OCR_10611	chr10	37365878	37366669	-1.7088	2.29677	55.0462	4.73e-10	6.34e-08	Treg_IK_StimVSTreg_WT_Stim	ENSMUST00000175235	AC155948.1-201
OCR_79838	chr4	85433032	85433733	-1.96435	1.87626	57.1969	4.72e-10	6.34e-08	Treg_IK_StimVSTreg_WT_Stim	ENSMUST00000157497	7SK.138-201
OCR_86702	chr5	72048762	72049751	-1.54581	2.88065	55.8929	4.73e-10	6.34e-08	Treg_IK_StimVSTreg_WT_Stim	ENSMUST00000031121	Gabra4-201
OCR_65362	chr2	113309271	113310329	-1.46043	3.09058	55.2449	4.74e-10	6.34e-08	Treg_IK_StimVSTreg_WT_Stim	ENSMUST00000148420	Gm13966-001
OCR_48946	chr17	13754591	13755462	-1.59032	2.32097	54.9804	4.81e-10	6.42e-08	Treg_IK_StimVSTreg_WT_Stim	ENSMUST00000137459	Tcte2-007
OCR_73049	chr3	92802570	92803071	-1.7834	2.16682	54.939	4.86e-10	6.47e-08	Treg_IK_StimVSTreg_WT_Stim	ENSMUST00000090863	Lce3f-201
OCR_27681	chr13	10233707	10234303	-1.91569	2.17012	54.9107	4.9e-10	6.51e-08	Treg_IK_StimVSTreg_WT_Stim	ENSMUST00000128990	Gm16950-201
OCR_84168	chr5	5913845	5914690	-1.75615	2.2492	56.3671	5.16e-10	6.82e-08	Treg_IK_StimVSTreg_WT_Stim	ENSMUST00000158067	U1.179-201
OCR_55492	chr18	55852154	55853587	-1.21533	3.78772	54.6358	5.27e-10	6.93e-08	Treg_IK_StimVSTreg_WT_Stim	ENSMUST00000174961	AC149599.1-201
OCR_83262	chr4	146709547	146710405	-1.20047	3.12744	54.6308	5.28e-10	6.93e-08	Treg_IK_StimVSTreg_WT_Stim	ENSMUST00000166764	Gm13151-201
OCR_84574	chr5	18733184	18734222	-1.48774	2.55919	54.5986	5.33e-10	6.98e-08	Treg_IK_StimVSTreg_WT_Stim	ENSMUST00000088516	Magi2-003
OCR_14871	chr10	115454897	115456002	-1.51446	2.83356	56.2284	5.39e-10	7.04e-08	Treg_IK_StimVSTreg_WT_Stim	ENSMUST00000063470	Ptprr-001
OCR_116759	chrX	5193248	5193873	-1.76163	2.16657	54.9987	5.4e-10	7.04e-08	Treg_IK_StimVSTreg_WT_Stim	ENSMUST00000121970	Gm14366-001
OCR_107409	chr8	56208342	56208600	-1.66872	2.46855	57.6372	5.5e-10	7.13e-08	Treg_IK_StimVSTreg_WT_Stim	ENSMUST00000033915	Gpm6a-201
OCR_74905	chr3	132741115	132741962	1.33278	3.64349	54.462	5.52e-10	7.14e-08	Treg_IK_StimVSTreg_WT_Stim	ENSMUST00000161577	Gstcd-005
OCR_28421	chr13	24870391	24871621	1.10171	4.69729	54.4274	5.64e-10	7.28e-08	Treg_IK_StimVSTreg_WT_Stim	ENSMUST00000110382	Gmnn-001
OCR_65896	chr2	123915628	123916910	-1.4136	3.1881	59.6191	5.67e-10	7.28e-08	Treg_IK_StimVSTreg_WT_Stim	ENSMUST00000137172	Sema6d-002
OCR_84592	chr5	19479349	19480196	-1.72413	2.29824	54.4026	5.66e-10	7.28e-08	Treg_IK_StimVSTreg_WT_Stim	ENSMUST00000115267	Magi2-002
OCR_79113	chr4	61469473	61470127	-1.60622	2.71516	59.0273	5.69e-10	7.29e-08	Treg_IK_StimVSTreg_WT_Stim	ENSMUST00000098035	Gm13775-201
OCR_40324	chr15	50484662	50485356	1.13494	4.6338	55.2052	5.73e-10	7.33e-08	Treg_IK_StimVSTreg_WT_Stim	ENSMUST00000080683	Trps1-204
OCR_87264	chr5	89464957	89465845	-1.57662	2.66836	54.3118	5.75e-10	7.34e-08	Treg_IK_StimVSTreg_WT_Stim	ENSMUST00000134303	Slc4a4-008
OCR_46946	chr16	73233483	73234840	-1.25158	2.97461	54.2562	5.84e-10	7.43e-08	Treg_IK_StimVSTreg_WT_Stim	ENSMUST00000082896	U1.36-201
OCR_77286	chr4	13669909	13671120	-1.63999	2.93522	64.5978	5.85e-10	7.44e-08	Treg_IK_StimVSTreg_WT_Stim	ENSMUST00000006761	Runx1t1-001
OCR_22917	chr12	30460398	30460955	-1.9163	2.04079	57.887	5.99e-10	7.56e-08	Treg_IK_StimVSTreg_WT_Stim	ENSMUST00000076157	Myt1l-203
OCR_22262	chr12	13539427	13540110	-1.69852	2.37731	54.1178	6.06e-10	7.63e-08	Treg_IK_StimVSTreg_WT_Stim	ENSMUST00000097247	U6.451-201
OCR_105361	chr7	152296462	152297955	-1.08261	4.28342	54.1632	6.07e-10	7.63e-08	Treg_IK_StimVSTreg_WT_Stim	ENSMUST00000093962	Ccnd1-001
OCR_14204	chr10	98544192	98544888	1.49893	3.42209	54.0835	6.11e-10	7.65e-08	Treg_IK_StimVSTreg_WT_Stim	ENSMUST00000020113	Poc1b-001
OCR_47470	chr16	87060386	87061791	-1.35114	3.12462	55.9801	6.11e-10	7.65e-08	Treg_IK_StimVSTreg_WT_Stim	ENSMUST00000158627	SNORA17.549-201
OCR_33325	chr14	9498218	9499330	-1.0629	4.35124	54.0598	6.15e-10	7.68e-08	Treg_IK_StimVSTreg_WT_Stim	ENSMUST00000166616	4930452B06Rik-201
OCR_51898	chr17	69190998	69191592	-1.8128	2.22772	57.1501	6.21e-10	7.74e-08	Treg_IK_StimVSTreg_WT_Stim	ENSMUST00000024843	Epb4.1l3-201
OCR_33998	chr14	19805511	19807109	-1.70986	2.99173	67.3143	6.36e-10	7.86e-08	Treg_IK_StimVSTreg_WT_Stim	ENSMUST00000124353	Ube2e2-004
OCR_8954	chr10	4961609	4962442	-1.42861	3.19346	53.9086	6.41e-10	7.88e-08	Treg_IK_StimVSTreg_WT_Stim	ENSMUST00000104408	U6.521-201
OCR_42248	chr15	84062034	84063002	-1.57824	2.24912	53.9113	6.4e-10	7.88e-08	Treg_IK_StimVSTreg_WT_Stim	ENSMUST00000023072	Parvb-001
OCR_103518	chr7	122360065	122361209	-1.37427	4.36307	69.0451	6.41e-10	7.88e-08	Treg_IK_StimVSTreg_WT_Stim	ENSMUST00000158723	7SK.300-201
OCR_27860	chr13	13017874	13018717	-1.23394	3.31924	53.937	6.7e-10	8.22e-08	Treg_IK_StimVSTreg_WT_Stim	ENSMUST00000070564	Prl2c2-201
OCR_67036	chr2	145059272	145060519	-1.46314	3.38718	58.3406	6.88e-10	8.4e-08	Treg_IK_StimVSTreg_WT_Stim	ENSMUST00000137908	Slc24a3-004
OCR_73007	chr3	91884371	91885869	-1.31567	3.28873	54.1077	6.87e-10	8.4e-08	Treg_IK_StimVSTreg_WT_Stim	ENSMUST00000058150	Lor-201
OCR_65878	chr2	122906387	122907314	-1.76009	2.25714	55.0288	6.91e-10	8.42e-08	Treg_IK_StimVSTreg_WT_Stim	ENSMUST00000120883	Gm13989-001
OCR_46552	chr16	58694191	58694792	1.17502	3.94307	53.6084	6.94e-10	8.44e-08	Treg_IK_StimVSTreg_WT_Stim	ENSMUST00000060077	Cpox-201
OCR_8456	chr1	191796678	191797417	-1.26691	3.6625	53.515	7.12e-10	8.64e-08	Treg_IK_StimVSTreg_WT_Stim	ENSMUST00000027897	Smyd2-001
OCR_83220	chr4	145703164	145703735	-1.42227	2.74521	53.4505	7.25e-10	8.77e-08	Treg_IK_StimVSTreg_WT_Stim	ENSMUST00000105735	Gm13247-001
OCR_26939	chr12	116008421	116008997	-1.82146	2.06956	53.415	7.32e-10	8.84e-08	Treg_IK_StimVSTreg_WT_Stim	ENSMUST00000103509	Ighv1-24-201
OCR_15545	chr10	124832700	124833326	-2.17767	1.92361	60.4472	7.4e-10	8.93e-08	Treg_IK_StimVSTreg_WT_Stim	ENSMUST00000063318	Slc16a7-201
OCR_65938	chr2	124530008	124531118	-1.15016	4.05437	54.2886	7.44e-10	8.96e-08	Treg_IK_StimVSTreg_WT_Stim	ENSMUST00000137397	Gm13994-001
OCR_687	chr1	22811886	22813343	-1.26832	3.52134	55.1989	7.52e-10	8.99e-08	Treg_IK_StimVSTreg_WT_Stim	ENSMUST00000097808	Rims1-203
OCR_76863	chr4	6890604	6891144	1.19488	4.09016	53.3081	7.53e-10	8.99e-08	Treg_IK_StimVSTreg_WT_Stim	ENSMUST00000150082	Tox-004
OCR_52919	chr17	86199029	86200582	-1.36051	3.37267	57.2538	7.64e-10	9.09e-08	Treg_IK_StimVSTreg_WT_Stim	ENSMUST00000163568	Six2-001
OCR_50507	chr17	43153257	43154649	-1.15412	3.83955	53.2122	7.73e-10	9.15e-08	Treg_IK_StimVSTreg_WT_Stim	ENSMUST00000024708	Tnfrsf21-201
OCR_79391	chr4	69423278	69424154	-1.53646	2.30433	53.1861	7.78e-10	9.2e-08	Treg_IK_StimVSTreg_WT_Stim	ENSMUST00000117230	Gm11221-001
OCR_93496	chr6	60778235	60779287	-1.41267	2.8274	53.1788	7.8e-10	9.2e-08	Treg_IK_StimVSTreg_WT_Stim	ENSMUST00000114268	Snca-201
OCR_73785	chr3	105606471	105606959	1.38856	4.07666	53.1307	7.9e-10	9.31e-08	Treg_IK_StimVSTreg_WT_Stim	ENSMUST00000090678	Rap1a-201
OCR_46358	chr16	55733783	55734339	1.45406	4.49796	67.4599	7.94e-10	9.33e-08	Treg_IK_StimVSTreg_WT_Stim	ENSMUST00000157825	U6.711-201
OCR_22535	chr12	19887935	19888834	-1.64241	2.17949	53.0548	8.06e-10	9.46e-08	Treg_IK_StimVSTreg_WT_Stim	ENSMUST00000103822	AC134254.1-201
OCR_54970	chr18	43366692	43367479	-1.54799	2.32102	53.0303	8.12e-10	9.48e-08	Treg_IK_StimVSTreg_WT_Stim	ENSMUST00000045477	Stk32a-201
OCR_85681	chr5	39955070	39955859	-2.11232	1.90921	61.2406	8.19e-10	9.55e-08	Treg_IK_StimVSTreg_WT_Stim	ENSMUST00000104334	SNORA17.194-201
OCR_103129	chr7	116282545	116283338	-1.46459	2.92023	53.1511	8.34e-10	9.65e-08	Treg_IK_StimVSTreg_WT_Stim	ENSMUST00000036992	Lmo1-201
OCR_108311	chr8	79669166	79670046	-1.63401	2.44808	53.4098	8.38e-10	9.67e-08	Treg_IK_StimVSTreg_WT_Stim	ENSMUST00000158684	SNORA17.562-201
OCR_40165	chr15	42269303	42270325	-1.39826	2.86968	52.8859	8.44e-10	9.71e-08	Treg_IK_StimVSTreg_WT_Stim	ENSMUST00000163363	Gm17473-201
OCR_23130	chr12	33855698	33856157	1.3208	4.18575	54.8611	8.49e-10	9.72e-08	Treg_IK_StimVSTreg_WT_Stim	ENSMUST00000136644	Atxn7l1-003
OCR_51507	chr17	62808206	62808692	-1.90841	1.91686	52.8654	8.49e-10	9.72e-08	Treg_IK_StimVSTreg_WT_Stim	ENSMUST00000082636	SNORA9.3-201
OCR_54984	chr18	43597203	43598249	-1.56461	2.63524	56.0704	8.73e-10	9.98e-08	Treg_IK_StimVSTreg_WT_Stim	ENSMUST00000121805	Dpysl3-001
OCR_31101	chr13	83662577	83663711	-1.26806	3.36639	52.674	8.94e-10	1.02e-07	Treg_IK_StimVSTreg_WT_Stim	ENSMUST00000091446	Mef2c-202
OCR_37205	chr14	87897467	87898704	-1.02289	4.27187	52.6496	9e-10	1.02e-07	Treg_IK_StimVSTreg_WT_Stim	ENSMUST00000163714	Tdrd3-005
OCR_75942	chr3	148512981	148514441	-1.11308	4.45106	53.0856	8.97e-10	1.02e-07	Treg_IK_StimVSTreg_WT_Stim	ENSMUST00000168352	Lphn2-205
OCR_76546	chr3	156909238	156910080	-2.18549	2.10408	63.259	9.11e-10	1.03e-07	Treg_IK_StimVSTreg_WT_Stim	ENSMUST00000083238	U6.251-201
OCR_96548	chr6	121422996	121423863	-1.44412	2.67821	52.6044	9.11e-10	1.03e-07	Treg_IK_StimVSTreg_WT_Stim	ENSMUST00000051049	Iqsec3-201
OCR_103496	chr7	122065631	122066126	-1.82152	2.00723	52.6129	9.09e-10	1.03e-07	Treg_IK_StimVSTreg_WT_Stim	ENSMUST00000059737	Gm6816-201
OCR_81624	chr4	121646865	121647597	-1.45536	2.67129	52.7619	9.13e-10	1.03e-07	Treg_IK_StimVSTreg_WT_Stim	ENSMUST00000121732	Gm12893-001
OCR_31893	chr13	98176273	98177181	-1.27198	3.77594	52.5455	9.26e-10	1.03e-07	Treg_IK_StimVSTreg_WT_Stim	ENSMUST00000109431	Gm11019-201
OCR_62657	chr2	54288246	54289636	-1.33689	3.07097	53.7136	9.23e-10	1.03e-07	Treg_IK_StimVSTreg_WT_Stim	ENSMUST00000112636	Galnt13-001
OCR_85683	chr5	40005892	40006543	-1.7519	2.12379	52.8843	9.28e-10	1.03e-07	Treg_IK_StimVSTreg_WT_Stim	ENSMUST00000152057	Hs3st1-004
OCR_88242	chr5	108185049	108185678	1.1625	4.20397	52.8092	9.28e-10	1.03e-07	Treg_IK_StimVSTreg_WT_Stim	ENSMUST00000162148	A430072P03Rik-002
OCR_9310	chr10	10408967	10409649	-1.78917	2.175	52.7778	9.35e-10	1.04e-07	Treg_IK_StimVSTreg_WT_Stim	ENSMUST00000100068	Gm10828-201
OCR_46753	chr16	65165175	65166078	-1.95152	2.0399	55.9506	9.42e-10	1.04e-07	Treg_IK_StimVSTreg_WT_Stim	ENSMUST00000158553	SNORA17.541-201
OCR_50462	chr17	40190803	40191507	-1.70027	2.04368	52.4255	9.56e-10	1.06e-07	Treg_IK_StimVSTreg_WT_Stim	ENSMUST00000104784	AC188608.1-201
OCR_91606	chr6	18762409	18763072	1.10821	4.1608	52.3594	9.74e-10	1.08e-07	Treg_IK_StimVSTreg_WT_Stim	ENSMUST00000096101	Gm5874-201
OCR_100050	chr7	46545511	46546404	-1.53267	2.90652	57.5479	9.88e-10	1.09e-07	Treg_IK_StimVSTreg_WT_Stim	ENSMUST00000093553	U6.424-201
OCR_3918	chr1	97520742	97521493	1.45147	3.17559	52.2388	1.01e-09	1.11e-07	Treg_IK_StimVSTreg_WT_Stim	ENSMUST00000043336	St8sia4-201
OCR_81638	chr4	121683213	121684054	-1.69991	2.31257	53.8463	1.01e-09	1.11e-07	Treg_IK_StimVSTreg_WT_Stim	ENSMUST00000117367	Gm12892-001
OCR_107668	chr8	66684006	66685032	-1.53063	2.61265	52.4287	1.03e-09	1.12e-07	Treg_IK_StimVSTreg_WT_Stim	ENSMUST00000066166	Tll1-201
OCR_60526	chr2	14525064	14526404	-1.1527	3.8766	52.1351	1.04e-09	1.13e-07	Treg_IK_StimVSTreg_WT_Stim	ENSMUST00000114723	Cacnb2-004
OCR_48249	chr16	97733645	97734365	-1.64368	2.30213	52.122	1.04e-09	1.13e-07	Treg_IK_StimVSTreg_WT_Stim	ENSMUST00000049721	Fam3b-001
OCR_47367	chr16	84713016	84714105	1.10902	5.55892	66.3067	1.04e-09	1.13e-07	Treg_IK_StimVSTreg_WT_Stim	ENSMUST00000164314	Mir155-202
OCR_54103	chr18	22702795	22703694	-1.9367	2.28808	59.0658	1.05e-09	1.14e-07	Treg_IK_StimVSTreg_WT_Stim	ENSMUST00000117001	AC103351.1-201
OCR_57058	chr18	82390320	82390889	-1.42844	2.67486	52.0799	1.05e-09	1.14e-07	Treg_IK_StimVSTreg_WT_Stim	ENSMUST00000078739	Gm17383-201
OCR_72356	chr3	80604111	80605334	-1.72257	3.16916	66.4812	1.05e-09	1.14e-07	Treg_IK_StimVSTreg_WT_Stim	ENSMUST00000075316	Gria2-201
OCR_16647	chr11	18771244	18771974	-1.63742	2.43458	52.7041	1.07e-09	1.15e-07	Treg_IK_StimVSTreg_WT_Stim	ENSMUST00000128654	8430419K02Rik-001
OCR_51530	chr17	63133033	63134075	-1.15712	4.03225	52.0515	1.07e-09	1.15e-07	Treg_IK_StimVSTreg_WT_Stim	ENSMUST00000078839	Efna5-002
OCR_10601	chr10	37245441	37246272	-1.59239	2.29981	51.9997	1.07e-09	1.15e-07	Treg_IK_StimVSTreg_WT_Stim	ENSMUST00000156892	Gm16988-201
OCR_23383	chr12	37403908	37405359	-1.3316	3.08674	52.3398	1.07e-09	1.15e-07	Treg_IK_StimVSTreg_WT_Stim	ENSMUST00000175257	Mir5099-201
OCR_5867	chr1	147003096	147003961	-1.6543	2.2996	51.9348	1.09e-09	1.16e-07	Treg_IK_StimVSTreg_WT_Stim	ENSMUST00000157954	SNORA17.446-201
OCR_54871	chr18	40037321	40037875	1.15985	4.04057	51.9061	1.1e-09	1.17e-07	Treg_IK_StimVSTreg_WT_Stim	ENSMUST00000063219	Pabpc2-001
OCR_51904	chr17	69289558	69290486	-1.91772	2.16414	57.6338	1.11e-09	1.17e-07	Treg_IK_StimVSTreg_WT_Stim	ENSMUST00000024843	Epb4.1l3-201
OCR_73013	chr3	91999447	92001139	-1.44674	3.12244	59.0246	1.1e-09	1.17e-07	Treg_IK_StimVSTreg_WT_Stim	ENSMUST00000074449	Sprr2a1-201
OCR_76664	chr4	3154975	3156144	-1.04372	3.83657	51.8861	1.11e-09	1.17e-07	Treg_IK_StimVSTreg_WT_Stim	ENSMUST00000141405	AI838599-001
OCR_4411	chr1	120916320	120916789	-2.21174	1.96404	65.683	1.11e-09	1.17e-07	Treg_IK_StimVSTreg_WT_Stim	ENSMUST00000159839	Gli2-007
OCR_3430	chr1	90146138	90146556	-1.30157	3.62371	59.4936	1.12e-09	1.18e-07	Treg_IK_StimVSTreg_WT_Stim	ENSMUST00000135948	Heatr7b1-003
OCR_100681	chr7	63107775	63108769	1.22368	4.23729	51.8249	1.13e-09	1.18e-07	Treg_IK_StimVSTreg_WT_Stim	ENSMUST00000163845	Cyfip1-006
OCR_58355	chr19	21937811	21938542	1.06733	4.40692	51.711	1.16e-09	1.22e-07	Treg_IK_StimVSTreg_WT_Stim	ENSMUST00000060477	Gm5514-201
OCR_84618	chr5	19805618	19806590	-1.53477	3.06338	53.1583	1.17e-09	1.22e-07	Treg_IK_StimVSTreg_WT_Stim	ENSMUST00000157143	U6.590-201
OCR_23072	chr12	33459022	33460173	1.04767	5.39794	58.3371	1.18e-09	1.23e-07	Treg_IK_StimVSTreg_WT_Stim	ENSMUST00000020886	Nampt-201
OCR_9939	chr10	21077626	21078667	1.39732	3.62965	51.6135	1.19e-09	1.24e-07	Treg_IK_StimVSTreg_WT_Stim	ENSMUST00000042699	Aldh8a1-001
OCR_54268	chr18	25885135	25885765	-1.83812	2.83103	64.6763	1.19e-09	1.24e-07	Treg_IK_StimVSTreg_WT_Stim	ENSMUST00000025117	Celf4-201
OCR_75966	chr3	148664339	148664829	-1.80227	1.92061	51.582	1.2e-09	1.25e-07	Treg_IK_StimVSTreg_WT_Stim	ENSMUST00000098518	Lphn2-202
OCR_15604	chr10	125402931	125404166	-1.56089	3.42546	65.4724	1.21e-09	1.25e-07	Treg_IK_StimVSTreg_WT_Stim	ENSMUST00000074807	Lrig3-201
OCR_108219	chr8	77070990	77071705	-1.709	1.99949	51.5303	1.22e-09	1.26e-07	Treg_IK_StimVSTreg_WT_Stim	ENSMUST00000137218	Gm11033-002
OCR_107087	chr8	46443308	46444181	-1.66833	2.53328	55.778	1.23e-09	1.27e-07	Treg_IK_StimVSTreg_WT_Stim	ENSMUST00000155230	Fam149a-003
OCR_11302	chr10	51608375	51609884	-1.74852	2.94407	66.7742	1.24e-09	1.27e-07	Treg_IK_StimVSTreg_WT_Stim	ENSMUST00000157573	SNORA17.392-201
OCR_55294	chr18	51276956	51278803	-1.19593	3.32314	51.4793	1.24e-09	1.27e-07	Treg_IK_StimVSTreg_WT_Stim	ENSMUST00000097576	Prr16-201
OCR_62977	chr2	61332039	61332741	1.03275	5.44386	60.7903	1.24e-09	1.27e-07	Treg_IK_StimVSTreg_WT_Stim	ENSMUST00000157715	SNORA75.3-201
OCR_97554	chr6	137403865	137404869	-1.20557	3.6368	51.4527	1.25e-09	1.27e-07	Treg_IK_StimVSTreg_WT_Stim	ENSMUST00000095376	Ptpro-202
OCR_48260	chr16	97832320	97833102	-1.51186	2.37677	51.4304	1.26e-09	1.28e-07	Treg_IK_StimVSTreg_WT_Stim	ENSMUST00000000395	Tmprss2-201
OCR_77616	chr4	24496133	24496727	1.1213	4.06039	51.3913	1.27e-09	1.28e-07	Treg_IK_StimVSTreg_WT_Stim	ENSMUST00000123984	Mms22l-010
OCR_103065	chr7	114669769	114670316	-1.91947	2.21872	51.3793	1.27e-09	1.28e-07	Treg_IK_StimVSTreg_WT_Stim	ENSMUST00000127444	Syt9-005
OCR_118004	chrX	126815565	126816494	1.14895	3.96541	51.3795	1.27e-09	1.28e-07	Treg_IK_StimVSTreg_WT_Stim	ENSMUST00000120343	Gm14984-001
OCR_435	chr1	15355669	15356359	-1.69879	2.10083	51.3641	1.28e-09	1.29e-07	Treg_IK_StimVSTreg_WT_Stim	ENSMUST00000171715	Kcnb2-203
OCR_8944	chr10	4795418	4796647	-1.16389	3.91035	51.3172	1.29e-09	1.29e-07	Treg_IK_StimVSTreg_WT_Stim	ENSMUST00000041639	Syne1-201
OCR_33977	chr14	19503113	19503653	-1.48485	3.16281	51.6066	1.29e-09	1.29e-07	Treg_IK_StimVSTreg_WT_Stim	ENSMUST00000135381	Ube2e2-002
OCR_38826	chr15	7079219	7080062	-1.59824	2.63521	53.2059	1.3e-09	1.29e-07	Treg_IK_StimVSTreg_WT_Stim	ENSMUST00000067190	Lifr-201
OCR_54215	chr18	24867478	24868876	-1.3611	2.97216	52.034	1.3e-09	1.29e-07	Treg_IK_StimVSTreg_WT_Stim	ENSMUST00000067987	Gm9955-201
OCR_63089	chr2	63936070	63937050	-1.41293	2.82457	51.5655	1.3e-09	1.29e-07	Treg_IK_StimVSTreg_WT_Stim	ENSMUST00000102728	Fign-002
OCR_113092	chr9	47337690	47339603	-1.03203	4.57116	53.526	1.3e-09	1.29e-07	Treg_IK_StimVSTreg_WT_Stim	ENSMUST00000114548	Cadm1-001
OCR_87854	chr5	102845310	102846251	-1.8377	2.39391	59.4239	1.32e-09	1.31e-07	Treg_IK_StimVSTreg_WT_Stim	ENSMUST00000094559	Arhgap24-001
OCR_86318	chr5	63245463	63246085	1.18316	4.57072	54.3622	1.33e-09	1.31e-07	Treg_IK_StimVSTreg_WT_Stim	ENSMUST00000170704	Gm17384-201
OCR_112084	chr9	22813966	22814924	-1.51654	2.66375	51.4348	1.33e-09	1.31e-07	Treg_IK_StimVSTreg_WT_Stim	ENSMUST00000071982	Bmper-201
OCR_103535	chr7	122596886	122597175	-1.77104	1.9487	51.1708	1.35e-09	1.32e-07	Treg_IK_StimVSTreg_WT_Stim	ENSMUST00000169129	Sox6-205
OCR_45626	chr16	42305875	42306810	-1.35999	2.91027	51.141	1.36e-09	1.33e-07	Treg_IK_StimVSTreg_WT_Stim	ENSMUST00000125187	Gap43-002
OCR_81212	chr4	114761112	114761985	1.1605	4.06382	51.1404	1.36e-09	1.33e-07	Treg_IK_StimVSTreg_WT_Stim	ENSMUST00000171877	Pdzk1ip1-201
OCR_101329	chr7	78713429	78714237	-1.77311	2.07678	52.5735	1.36e-09	1.33e-07	Treg_IK_StimVSTreg_WT_Stim	ENSMUST00000094315	Gm10295-201
OCR_38051	chr14	116941156	116942478	-1.25942	3.0358	51.0789	1.38e-09	1.35e-07	Treg_IK_StimVSTreg_WT_Stim	ENSMUST00000078849	Gpc6-001
OCR_70931	chr3	39607898	39608992	-1.87457	2.71158	67.961	1.39e-09	1.35e-07	Treg_IK_StimVSTreg_WT_Stim	ENSMUST00000084011	U1.111-201
OCR_81632	chr4	121665738	121666598	-1.81443	2.37186	56.9896	1.39e-09	1.35e-07	Treg_IK_StimVSTreg_WT_Stim	ENSMUST00000121732	Gm12893-001
OCR_97616	chr6	138296105	138297064	-1.66759	2.20862	51.2888	1.4e-09	1.36e-07	Treg_IK_StimVSTreg_WT_Stim	ENSMUST00000163065	Lmo3-004
OCR_109177	chr8	94888073	94888853	-1.27638	3.35896	51.0343	1.4e-09	1.36e-07	Treg_IK_StimVSTreg_WT_Stim	ENSMUST00000034184	Irx5-001
OCR_64358	chr2	90382727	90383432	1.3143	3.68439	52.6679	1.41e-09	1.36e-07	Treg_IK_StimVSTreg_WT_Stim	ENSMUST00000026352	Ptprj-201
OCR_45790	chr16	45025422	45025967	1.02148	4.52225	50.979	1.42e-09	1.37e-07	Treg_IK_StimVSTreg_WT_Stim	ENSMUST00000163358	Cd200r3-010
OCR_62640	chr2	53496265	53497039	-1.75723	1.98246	50.9341	1.44e-09	1.39e-07	Treg_IK_StimVSTreg_WT_Stim	ENSMUST00000121574	Gm13502-001
OCR_108377	chr8	80247731	80248672	-1.52266	2.53547	51.1548	1.45e-09	1.39e-07	Treg_IK_StimVSTreg_WT_Stim	ENSMUST00000034029	Ednra-001
OCR_85651	chr5	39637348	39638254	-2.17154	2.4422	71.3525	1.51e-09	1.44e-07	Treg_IK_StimVSTreg_WT_Stim	ENSMUST00000157220	7SK.92-201
OCR_15527	chr10	124726633	124727201	-1.81719	2.03568	51.1674	1.56e-09	1.48e-07	Treg_IK_StimVSTreg_WT_Stim	ENSMUST00000105257	Slc16a7-202
OCR_66409	chr2	132495817	132496453	1.15667	4.10242	50.5956	1.58e-09	1.5e-07	Treg_IK_StimVSTreg_WT_Stim	ENSMUST00000117769	Gm14099-001
OCR_27709	chr13	10577264	10578006	-1.56875	2.11954	50.5114	1.62e-09	1.52e-07	Treg_IK_StimVSTreg_WT_Stim	ENSMUST00000175519	AC122824.1-201
OCR_39740	chr15	33476012	33476838	-1.71693	2.08635	50.7649	1.62e-09	1.52e-07	Treg_IK_StimVSTreg_WT_Stim	ENSMUST00000157437	5S_rRNA.25-201
OCR_107292	chr8	49928036	49929202	-1.25988	2.98926	50.4686	1.64e-09	1.54e-07	Treg_IK_StimVSTreg_WT_Stim	ENSMUST00000158923	SNORA17.603-201
OCR_48751	chr17	11633724	11634608	-1.90026	2.37571	60.9282	1.65e-09	1.55e-07	Treg_IK_StimVSTreg_WT_Stim	ENSMUST00000115696	Park2-202
OCR_65325	chr2	113039349	113040162	-1.40828	2.59777	50.4127	1.66e-09	1.55e-07	Treg_IK_StimVSTreg_WT_Stim	ENSMUST00000099579	Ryr3-202
OCR_9622	chr10	17491579	17492810	1.01631	5.95841	63.625	1.7e-09	1.58e-07	Treg_IK_StimVSTreg_WT_Stim	ENSMUST00000175676	Txlnb-002
OCR_111294	chr9	2999932	3000708	-1.08478	3.69892	50.3044	1.71e-09	1.59e-07	Treg_IK_StimVSTreg_WT_Stim	ENSMUST00000151376	Gm10722-201
OCR_65387	chr2	113598440	113599455	-1.43332	2.57174	50.2758	1.73e-09	1.6e-07	Treg_IK_StimVSTreg_WT_Stim	ENSMUST00000099575	Grem1-001
OCR_101343	chr7	79241450	79242158	-1.67873	2.06259	50.2786	1.72e-09	1.6e-07	Treg_IK_StimVSTreg_WT_Stim	ENSMUST00000079323	Mctp2-201
OCR_48265	chr16	97895707	97896698	-1.55024	2.65235	52.5183	1.75e-09	1.62e-07	Treg_IK_StimVSTreg_WT_Stim	ENSMUST00000000395	Tmprss2-201
OCR_1367	chr1	42752569	42754040	-1.43622	3.17612	55.2468	1.76e-09	1.62e-07	Treg_IK_StimVSTreg_WT_Stim	ENSMUST00000054883	Pou3f3-001
OCR_107090	chr8	46466531	46467187	-1.77341	2.18151	52.0713	1.76e-09	1.62e-07	Treg_IK_StimVSTreg_WT_Stim	ENSMUST00000093526	Fam149a-001
OCR_93269	chr6	55206435	55207591	-1.37279	2.88642	50.1739	1.78e-09	1.63e-07	Treg_IK_StimVSTreg_WT_Stim	ENSMUST00000175067	AC083946.1-201
OCR_28536	chr13	29302076	29302936	-1.41997	3.17703	50.5931	1.79e-09	1.64e-07	Treg_IK_StimVSTreg_WT_Stim	ENSMUST00000137593	Gm11364-001
OCR_26926	chr12	115821544	115822241	-1.61474	2.17472	50.0897	1.82e-09	1.66e-07	Treg_IK_StimVSTreg_WT_Stim	ENSMUST00000103498	Ighv1-9-201
OCR_14423	chr10	104576398	104577182	-1.63065	2.44641	52.8474	1.84e-09	1.68e-07	Treg_IK_StimVSTreg_WT_Stim	ENSMUST00000104219	SNORA17.134-201
OCR_7039	chr1	168930573	168932086	-1.364	3.88342	60.7567	1.89e-09	1.72e-07	Treg_IK_StimVSTreg_WT_Stim	ENSMUST00000149894	Gm16701-202
OCR_106876	chr8	38125018	38125835	-1.48487	2.65229	49.9395	1.9e-09	1.72e-07	Treg_IK_StimVSTreg_WT_Stim	ENSMUST00000098825	AI429214-201
OCR_38739	chr15	5644925	5645430	1.30809	3.38639	49.874	1.93e-09	1.75e-07	Treg_IK_StimVSTreg_WT_Stim	ENSMUST00000047379	Ptger4-001
OCR_67065	chr2	145413819	145414993	-1.32168	3.24062	49.8629	1.95e-09	1.77e-07	Treg_IK_StimVSTreg_WT_Stim	ENSMUST00000131123	Slc24a3-003
OCR_13439	chr10	87868123	87868999	1.00498	4.8664	49.9776	2e-09	1.8e-07	Treg_IK_StimVSTreg_WT_Stim	ENSMUST00000166745	Gm17338-201
OCR_54253	chr18	25712829	25713639	-1.37733	3.31788	53.668	2e-09	1.8e-07	Treg_IK_StimVSTreg_WT_Stim	ENSMUST00000122588	7SK.31-201
OCR_75962	chr3	148622304	148622937	-1.65098	2.37013	49.9647	2e-09	1.8e-07	Treg_IK_StimVSTreg_WT_Stim	ENSMUST00000037655	Lphn2-201
OCR_108376	chr8	80237386	80238052	-1.52362	2.67968	49.7546	2e-09	1.8e-07	Treg_IK_StimVSTreg_WT_Stim	ENSMUST00000034029	Ednra-001
OCR_52087	chr17	72529021	72529633	-1.81806	2.34212	53.2507	2.01e-09	1.8e-07	Treg_IK_StimVSTreg_WT_Stim	ENSMUST00000158862	U1.203-201
OCR_49307	chr17	23655757	23656560	-1.40503	2.76303	50.6668	2.02e-09	1.8e-07	Treg_IK_StimVSTreg_WT_Stim	ENSMUST00000088673	Gm5146-201
OCR_76667	chr4	3163330	3163939	-1.68357	2.04803	49.7047	2.02e-09	1.8e-07	Treg_IK_StimVSTreg_WT_Stim	ENSMUST00000141405	AI838599-001
OCR_75552	chr3	143370667	143371367	-1.93279	2.20214	53.7339	2.04e-09	1.81e-07	Treg_IK_StimVSTreg_WT_Stim	ENSMUST00000158226	SNORA4.6-201
OCR_75517	chr3	143042070	143042592	-1.52874	2.98915	50.4977	2.05e-09	1.82e-07	Treg_IK_StimVSTreg_WT_Stim	ENSMUST00000158226	SNORA4.6-201
OCR_28550	chr13	29432107	29433317	-1.31872	2.87276	49.6383	2.06e-09	1.82e-07	Treg_IK_StimVSTreg_WT_Stim	ENSMUST00000137593	Gm11364-001
OCR_93683	chr6	65948104	65948720	-2.0178	2.07234	49.6233	2.07e-09	1.83e-07	Treg_IK_StimVSTreg_WT_Stim	ENSMUST00000082457	U6.5-201
OCR_79120	chr4	61484153	61484586	-1.78476	2.08139	53.1934	2.08e-09	1.83e-07	Treg_IK_StimVSTreg_WT_Stim	ENSMUST00000117871	Gm12572-001
OCR_96000	chr6	114811037	114811750	1.11711	4.44262	49.5691	2.1e-09	1.84e-07	Treg_IK_StimVSTreg_WT_Stim	ENSMUST00000123478	Vgll4-006
OCR_83354	chr4	147407979	147408320	1.26524	3.96561	49.5559	2.11e-09	1.85e-07	Treg_IK_StimVSTreg_WT_Stim	ENSMUST00000119862	Gm13207-001
OCR_76855	chr4	6867768	6868742	1.07365	4.59647	50.7522	2.14e-09	1.87e-07	Treg_IK_StimVSTreg_WT_Stim	ENSMUST00000150082	Tox-004
OCR_7070	chr1	169481291	169482456	-1.23081	3.34669	49.487	2.15e-09	1.88e-07	Treg_IK_StimVSTreg_WT_Stim	ENSMUST00000015987	Rxrg-001
OCR_103992	chr7	131290123	131291217	-1.82656	2.39164	58.2491	2.16e-09	1.89e-07	Treg_IK_StimVSTreg_WT_Stim	ENSMUST00000103988	SNORA17.21-201
OCR_45968	chr16	48464609	48465638	-1.58662	2.34161	49.455	2.18e-09	1.9e-07	Treg_IK_StimVSTreg_WT_Stim	ENSMUST00000023330	Morc1-201
OCR_73691	chr3	103711223	103712064	1.19796	4.20362	49.4046	2.2e-09	1.91e-07	Treg_IK_StimVSTreg_WT_Stim	ENSMUST00000116162	Gm15602-001
OCR_66780	chr2	140496802	140497414	-1.59562	2.74375	49.8265	2.22e-09	1.92e-07	Treg_IK_StimVSTreg_WT_Stim	ENSMUST00000056760	Flrt3-002
OCR_54157	chr18	24006677	24007284	1.22545	4.02087	49.3307	2.25e-09	1.94e-07	Treg_IK_StimVSTreg_WT_Stim	ENSMUST00000158665	U6.881-201
OCR_74268	chr3	117062974	117063621	-1.54078	2.21202	49.3248	2.25e-09	1.94e-07	Treg_IK_StimVSTreg_WT_Stim	ENSMUST00000061071	D3Bwg0562e-001
OCR_27852	chr13	13000702	13001649	-1.24733	3.22934	50.2338	2.27e-09	1.95e-07	Treg_IK_StimVSTreg_WT_Stim	ENSMUST00000070564	Prl2c2-201
OCR_53639	chr18	11054383	11055255	-1.39868	2.73055	49.4395	2.27e-09	1.95e-07	Treg_IK_StimVSTreg_WT_Stim	ENSMUST00000133759	1010001N08Rik-201
OCR_13598	chr10	90781909	90782782	-1.41904	2.35931	49.2678	2.29e-09	1.96e-07	Treg_IK_StimVSTreg_WT_Stim	ENSMUST00000170969	Gm16484-201
OCR_35191	chr14	44510638	44511120	-1.80188	2.33445	49.3615	2.3e-09	1.97e-07	Treg_IK_StimVSTreg_WT_Stim	ENSMUST00000161130	Gm9550-001
OCR_46283	chr16	52595388	52596912	-1.19357	3.23847	49.2229	2.32e-09	1.98e-07	Treg_IK_StimVSTreg_WT_Stim	ENSMUST00000023312	Alcam-001
OCR_23709	chr12	46296297	46297072	-1.65676	2.16248	49.5562	2.34e-09	1.99e-07	Treg_IK_StimVSTreg_WT_Stim	ENSMUST00000158227	SNORA17.489-201
OCR_107711	chr8	67634214	67634956	-1.56955	2.7471	49.1826	2.34e-09	1.99e-07	Treg_IK_StimVSTreg_WT_Stim	ENSMUST00000175101	AC102287.1-201
OCR_38223	chr14	119659470	119660319	-1.48363	2.56265	49.1697	2.35e-09	2e-07	Treg_IK_StimVSTreg_WT_Stim	ENSMUST00000065904	Hs6st3-201
OCR_59585	chr19	56142636	56144022	-1.30761	3.18804	49.1698	2.35e-09	2e-07	Treg_IK_StimVSTreg_WT_Stim	ENSMUST00000148666	Tcf7l2-015
OCR_62608	chr2	52716357	52717883	-1.15941	3.49841	49.1557	2.36e-09	2e-07	Treg_IK_StimVSTreg_WT_Stim	ENSMUST00000090952	Fmnl2-001
OCR_95468	chr6	101327060	101328014	-1.4716	2.76226	51.8335	2.36e-09	2e-07	Treg_IK_StimVSTreg_WT_Stim	ENSMUST00000151175	Pdzrn3-003
OCR_10544	chr10	35984614	35985382	-1.55705	2.16891	49.0673	2.42e-09	2.03e-07	Treg_IK_StimVSTreg_WT_Stim	ENSMUST00000167191	Hs3st5-002
OCR_80448	chr4	98866375	98867065	-1.60004	2.46518	49.2159	2.42e-09	2.03e-07	Treg_IK_StimVSTreg_WT_Stim	ENSMUST00000030279	Atg4c-001
OCR_32608	chr13	109436966	109437982	-1.43575	2.91554	49.2262	2.44e-09	2.04e-07	Treg_IK_StimVSTreg_WT_Stim	ENSMUST00000122041	Pde4d-001
OCR_42858	chr15	94815994	94817139	-1.53094	2.61686	52.5971	2.47e-09	2.06e-07	Treg_IK_StimVSTreg_WT_Stim	ENSMUST00000104259	SNORA17.154-201
OCR_87883	chr5	103206316	103207562	-1.47555	3.64322	57.8949	2.46e-09	2.06e-07	Treg_IK_StimVSTreg_WT_Stim	ENSMUST00000112852	Arhgap24-003
OCR_15104	chr10	117609100	117610132	1.10082	4.37365	48.9702	2.49e-09	2.07e-07	Treg_IK_StimVSTreg_WT_Stim	ENSMUST00000020437	Mdm1-201
OCR_68840	chr2	170958331	170958944	-1.79018	1.98234	48.9421	2.51e-09	2.08e-07	Treg_IK_StimVSTreg_WT_Stim	ENSMUST00000125631	Gm14266-002
OCR_109232	chr8	95535248	95535703	-1.79205	2.52349	53.1448	2.51e-09	2.09e-07	Treg_IK_StimVSTreg_WT_Stim	ENSMUST00000095211	Ces1a-201
OCR_679	chr1	22540020	22540895	-1.44815	2.4861	48.9115	2.53e-09	2.09e-07	Treg_IK_StimVSTreg_WT_Stim	ENSMUST00000081544	Rims1-201
OCR_102425	chr7	103299850	103300275	-1.73772	2.11344	48.9334	2.55e-09	2.1e-07	Treg_IK_StimVSTreg_WT_Stim	ENSMUST00000107162	Odz4-001
OCR_46785	chr16	65815000	65816440	-1.22539	3.32752	49.2439	2.58e-09	2.12e-07	Treg_IK_StimVSTreg_WT_Stim	ENSMUST00000168064	Vgll3-201
OCR_66782	chr2	140512498	140513129	-1.73903	2.01029	48.8435	2.6e-09	2.13e-07	Treg_IK_StimVSTreg_WT_Stim	ENSMUST00000110057	Flrt3-001
OCR_68045	chr2	160192464	160194121	-1.00624	4.58064	50.1491	2.62e-09	2.14e-07	Treg_IK_StimVSTreg_WT_Stim	ENSMUST00000099126	Mafb-001
OCR_81001	chr4	108777723	108778432	1.20348	4.21881	48.7954	2.61e-09	2.14e-07	Treg_IK_StimVSTreg_WT_Stim	ENSMUST00000153714	Osbpl9-007
OCR_40856	chr15	61875114	61875906	1.04968	4.28174	48.7604	2.64e-09	2.14e-07	Treg_IK_StimVSTreg_WT_Stim	ENSMUST00000165627	Pvt1-202
OCR_60645	chr2	17123655	17124312	-1.77553	1.93307	49.0062	2.63e-09	2.14e-07	Treg_IK_StimVSTreg_WT_Stim	ENSMUST00000152803	Gm13322-001
OCR_71127	chr3	48391140	48392226	-1.3262	2.69219	48.7645	2.63e-09	2.14e-07	Treg_IK_StimVSTreg_WT_Stim	ENSMUST00000036023	1700018B24Rik-201
OCR_45539	chr16	38403304	38404154	1.06639	4.82915	49.2924	2.65e-09	2.14e-07	Treg_IK_StimVSTreg_WT_Stim	ENSMUST00000002926	Pla1a-201
OCR_96161	chr6	116603825	116604782	-1.19363	3.49455	48.7187	2.67e-09	2.16e-07	Treg_IK_StimVSTreg_WT_Stim	ENSMUST00000067354	8430408G22Rik-201
OCR_103137	chr7	116374045	116374647	-1.70468	2.28288	48.7033	2.68e-09	2.16e-07	Treg_IK_StimVSTreg_WT_Stim	ENSMUST00000036992	Lmo1-201
OCR_112245	chr9	28068830	28069507	-1.35021	3.03061	48.93	2.68e-09	2.16e-07	Treg_IK_StimVSTreg_WT_Stim	ENSMUST00000139851	Gm15606-002
OCR_69161	chr2	177832375	177833207	-1.18891	3.78435	49.3061	2.69e-09	2.17e-07	Treg_IK_StimVSTreg_WT_Stim	ENSMUST00000108923	Zfp931-001
OCR_102335	chr7	99122572	99123569	-1.4515	2.63883	50.4447	2.7e-09	2.17e-07	Treg_IK_StimVSTreg_WT_Stim	ENSMUST00000098308	Dlg2-004
OCR_47552	chr16	88289373	88290100	-1.73153	2.19718	49.5983	2.74e-09	2.2e-07	Treg_IK_StimVSTreg_WT_Stim	ENSMUST00000165675	Grik1-204
OCR_22445	chr12	17384442	17384891	1.41518	3.37458	48.6102	2.75e-09	2.2e-07	Treg_IK_StimVSTreg_WT_Stim	ENSMUST00000175296	Mir3066-201
OCR_9424	chr10	13144101	13144794	1.27256	4.00073	48.5436	2.8e-09	2.24e-07	Treg_IK_StimVSTreg_WT_Stim	ENSMUST00000079698	Phactr2-002
OCR_67175	chr2	147199167	147199719	-1.68131	2.0449	48.5057	2.83e-09	2.26e-07	Treg_IK_StimVSTreg_WT_Stim	ENSMUST00000156584	Pax1-003
OCR_27844	chr13	12973113	12973624	-1.49221	2.36476	48.4811	2.85e-09	2.27e-07	Treg_IK_StimVSTreg_WT_Stim	ENSMUST00000099805	Prl2c3-201
OCR_104796	chr7	144388986	144389798	-1.58095	2.19258	48.4717	2.86e-09	2.27e-07	Treg_IK_StimVSTreg_WT_Stim	ENSMUST00000169486	Ebf3-204
OCR_14131	chr10	97155666	97157101	-1.58872	2.8497	56.2386	2.87e-09	2.28e-07	Treg_IK_StimVSTreg_WT_Stim	ENSMUST00000060703	4921510H08Rik-201
OCR_62538	chr2	51442006	51442620	-1.90283	2.15856	53.7311	2.9e-09	2.29e-07	Treg_IK_StimVSTreg_WT_Stim	ENSMUST00000118267	Gm13491-001
OCR_93086	chr6	52528054	52528842	1.00606	4.36095	48.4276	2.9e-09	2.29e-07	Treg_IK_StimVSTreg_WT_Stim	ENSMUST00000149471	Hibadh-002
OCR_107767	chr8	69800712	69802392	-1.49943	3.29035	61.4306	2.91e-09	2.3e-07	Treg_IK_StimVSTreg_WT_Stim	ENSMUST00000158755	SNORA17.578-201
OCR_55399	chr18	54452643	54453920	-1.33439	3.06298	48.7917	2.92e-09	2.3e-07	Treg_IK_StimVSTreg_WT_Stim	ENSMUST00000139348	9430076G02Rik-201
OCR_70269	chr3	26350868	26351926	-1.43667	2.57847	48.6082	2.94e-09	2.31e-07	Treg_IK_StimVSTreg_WT_Stim	ENSMUST00000099182	A830092H15Rik-201
OCR_108854	chr8	90060420	90060923	-1.77992	2.68113	57.0633	2.94e-09	2.31e-07	Treg_IK_StimVSTreg_WT_Stim	ENSMUST00000093342	4933402J07Rik-001
OCR_3556	chr1	91456691	91457303	-1.84184	1.98662	52.1586	2.95e-09	2.31e-07	Treg_IK_StimVSTreg_WT_Stim	ENSMUST00000157746	5S_rRNA.43-201
OCR_26913	chr12	115604341	115605167	-1.30946	3.21455	48.3292	2.98e-09	2.32e-07	Treg_IK_StimVSTreg_WT_Stim	ENSMUST00000103485	Ighv12-3-201
OCR_33986	chr14	19647143	19648427	-1.34786	3.06162	51.6765	2.97e-09	2.32e-07	Treg_IK_StimVSTreg_WT_Stim	ENSMUST00000104501	SNORA17.274-201
OCR_59711	chr19	58528694	58530699	-1.017	4.37265	48.7458	2.98e-09	2.32e-07	Treg_IK_StimVSTreg_WT_Stim	ENSMUST00000169850	Gfra1-202
OCR_5686	chr1	144896350	144897297	-1.60444	2.30672	48.3844	3.01e-09	2.33e-07	Treg_IK_StimVSTreg_WT_Stim	ENSMUST00000105081	Cdc73-201
OCR_12248	chr10	68861349	68862360	-1.57125	2.79032	54.2682	3.01e-09	2.33e-07	Treg_IK_StimVSTreg_WT_Stim	ENSMUST00000020099	Cdk1-001
OCR_25632	chr12	93819983	93821041	-1.67749	2.45079	50.834	3.01e-09	2.33e-07	Treg_IK_StimVSTreg_WT_Stim	ENSMUST00000077660	Gm2228-201
OCR_89518	chr5	128003065	128003785	-1.53623	2.25316	48.3	3e-09	2.33e-07	Treg_IK_StimVSTreg_WT_Stim	ENSMUST00000128068	Tmem132c-003
OCR_75920	chr3	148391988	148392522	-1.60914	2.34299	48.2597	3.04e-09	2.34e-07	Treg_IK_StimVSTreg_WT_Stim	ENSMUST00000168352	Lphn2-205
OCR_22517	chr12	18393737	18395092	-1.3997	2.81243	51.1328	3.06e-09	2.35e-07	Treg_IK_StimVSTreg_WT_Stim	ENSMUST00000080502	Gm9590-201
OCR_84558	chr5	17865480	17866505	-1.44124	2.72094	48.9312	3.06e-09	2.35e-07	Treg_IK_StimVSTreg_WT_Stim	ENSMUST00000074694	Gnai1-201
OCR_81661	chr4	121784815	121785510	-1.38833	2.57277	48.2276	3.06e-09	2.35e-07	Treg_IK_StimVSTreg_WT_Stim	ENSMUST00000117367	Gm12892-001
OCR_32407	chr13	106170183	106170839	-1.87703	2.01308	49.5837	3.08e-09	2.36e-07	Treg_IK_StimVSTreg_WT_Stim	ENSMUST00000022235	Htr1a-201
OCR_25411	chr12	89606790	89607420	-1.75782	2.01531	48.156	3.13e-09	2.39e-07	Treg_IK_StimVSTreg_WT_Stim	ENSMUST00000166940	Adck1-202
OCR_85997	chr5	50420810	50421388	-1.66999	2.43152	48.9109	3.14e-09	2.39e-07	Treg_IK_StimVSTreg_WT_Stim	ENSMUST00000087390	Gpr125-202
OCR_95016	chr6	94232740	94233293	-1.5867	2.18432	48.1335	3.15e-09	2.39e-07	Treg_IK_StimVSTreg_WT_Stim	ENSMUST00000055224	Magi1-201
OCR_9226	chr10	8732555	8733217	-1.61317	2.57325	48.809	3.23e-09	2.45e-07	Treg_IK_StimVSTreg_WT_Stim	ENSMUST00000015449	Sash1-201
OCR_106116	chr8	19929734	19930314	-1.59811	2.37739	48.7566	3.25e-09	2.46e-07	Treg_IK_StimVSTreg_WT_Stim	ENSMUST00000084046	Gm15319-001
OCR_7533	chr1	177422033	177423068	-1.27377	2.99009	47.976	3.29e-09	2.48e-07	Treg_IK_StimVSTreg_WT_Stim	ENSMUST00000027812	Rgs7-201
OCR_79828	chr4	85159731	85160700	-1.37239	2.5919	48.0458	3.3e-09	2.49e-07	Treg_IK_StimVSTreg_WT_Stim	ENSMUST00000147066	Gm12680-001
OCR_93630	chr6	65422328	65423103	1.21684	4.42146	54.9425	3.3e-09	2.49e-07	Treg_IK_StimVSTreg_WT_Stim	ENSMUST00000136016	C130060K24Rik-002
OCR_86231	chr5	58259693	58260733	-1.68437	2.57156	50.6316	3.33e-09	2.5e-07	Treg_IK_StimVSTreg_WT_Stim	ENSMUST00000094783	Pcdh7-202
OCR_27841	chr13	12955867	12957511	-1.08197	3.6647	48.0653	3.38e-09	2.53e-07	Treg_IK_StimVSTreg_WT_Stim	ENSMUST00000099805	Prl2c3-201
OCR_83045	chr4	141805189	141805713	-1.68038	2.25336	47.8782	3.38e-09	2.53e-07	Treg_IK_StimVSTreg_WT_Stim	ENSMUST00000070792	Kazn-201
OCR_107489	chr8	60067824	60068639	1.75456	4.23591	68.6734	3.43e-09	2.55e-07	Treg_IK_StimVSTreg_WT_Stim	ENSMUST00000145057	Gm10284-001
OCR_39595	chr15	31095777	31097236	-1.0249	4.04687	47.7546	3.5e-09	2.6e-07	Treg_IK_StimVSTreg_WT_Stim	ENSMUST00000104280	SNORA17.166-201
OCR_62650	chr2	53937127	53938397	-1.25026	3.40835	50.0335	3.58e-09	2.64e-07	Treg_IK_StimVSTreg_WT_Stim	ENSMUST00000100089	Rprm-001
OCR_71444	chr3	54203186	54204545	-1.13895	3.48984	47.6797	3.58e-09	2.64e-07	Treg_IK_StimVSTreg_WT_Stim	ENSMUST00000150868	Postn-009
OCR_111017	chr8	128347420	128348013	-1.51115	2.60629	47.6818	3.58e-09	2.64e-07	Treg_IK_StimVSTreg_WT_Stim	ENSMUST00000120589	Pcnxl2-003
OCR_85951	chr5	48374088	48375835	-1.18235	3.69321	50.7363	3.61e-09	2.65e-07	Treg_IK_StimVSTreg_WT_Stim	ENSMUST00000174061	Slit2-019
OCR_72401	chr3	81080656	81081373	-1.79987	2.20958	51.6313	3.64e-09	2.67e-07	Treg_IK_StimVSTreg_WT_Stim	ENSMUST00000146657	Gm16000-001
OCR_100733	chr7	64791685	64792459	-1.45923	2.4072	47.6143	3.65e-09	2.67e-07	Treg_IK_StimVSTreg_WT_Stim	ENSMUST00000068456	Gabra5-201
OCR_71769	chr3	60406975	60407883	1.14522	4.25062	47.5436	3.72e-09	2.72e-07	Treg_IK_StimVSTreg_WT_Stim	ENSMUST00000076983	Mbnl1-202
OCR_27863	chr13	13023683	13024712	-1.142	3.60665	48.9703	3.75e-09	2.73e-07	Treg_IK_StimVSTreg_WT_Stim	ENSMUST00000070564	Prl2c2-201
OCR_7990	chr1	184693645	184695241	-1.01118	4.27494	47.3576	3.92e-09	2.83e-07	Treg_IK_StimVSTreg_WT_Stim	ENSMUST00000155229	Susd4-002
OCR_3563	chr1	91543121	91543698	-1.42843	2.96542	48.5765	3.95e-09	2.84e-07	Treg_IK_StimVSTreg_WT_Stim	ENSMUST00000158150	7SK.230-201
OCR_33372	chr14	10225732	10226282	-1.55022	2.5918	47.3614	3.95e-09	2.84e-07	Treg_IK_StimVSTreg_WT_Stim	ENSMUST00000162465	Gm16543-001
OCR_34827	chr14	33912290	33913077	-1.44406	2.57293	47.3257	3.96e-09	2.84e-07	Treg_IK_StimVSTreg_WT_Stim	ENSMUST00000132153	Wdfy4-002
OCR_35164	chr14	44058022	44058810	-2.21955	3.14097	88.3895	4.05e-09	2.9e-07	Treg_IK_StimVSTreg_WT_Stim	ENSMUST00000171913	Gm9597-001
OCR_34587	chr14	30243542	30244251	-1.87772	2.03225	52.9864	4.08e-09	2.92e-07	Treg_IK_StimVSTreg_WT_Stim	ENSMUST00000099961	Gm6043-201
OCR_4395	chr1	120655844	120656732	-1.59173	2.92648	53.7003	4.14e-09	2.95e-07	Treg_IK_StimVSTreg_WT_Stim	ENSMUST00000157738	U1.168-201
OCR_107777	chr8	69955121	69955652	-1.45058	3.48728	52.7573	4.28e-09	3.04e-07	Treg_IK_StimVSTreg_WT_Stim	ENSMUST00000026677	Nat1-201
OCR_108318	chr8	79746577	79747518	-1.40067	2.65187	47.0124	4.33e-09	3.07e-07	Treg_IK_StimVSTreg_WT_Stim	ENSMUST00000158317	U2.48-201
OCR_112552	chr9	35302662	35303697	1.19463	4.12785	47.02	4.37e-09	3.1e-07	Treg_IK_StimVSTreg_WT_Stim	ENSMUST00000157980	5S_rRNA.59-201
OCR_81645	chr4	121713672	121714821	-1.52925	3.3313	62.2738	4.39e-09	3.11e-07	Treg_IK_StimVSTreg_WT_Stim	ENSMUST00000117367	Gm12892-001
OCR_23706	chr12	46284149	46285003	-1.67763	2.2514	49.6139	4.43e-09	3.13e-07	Treg_IK_StimVSTreg_WT_Stim	ENSMUST00000158227	SNORA17.489-201
OCR_40682	chr15	58758944	58759588	1.35017	4.09748	52.2214	4.43e-09	3.13e-07	Treg_IK_StimVSTreg_WT_Stim	ENSMUST00000089937	Tatdn1-201
OCR_100722	chr7	64438504	64439691	-1.2663	2.84229	46.9238	4.45e-09	3.13e-07	Treg_IK_StimVSTreg_WT_Stim	ENSMUST00000068394	Gabrg3-001
OCR_66800	chr2	140644937	140645950	-1.40565	3.06436	46.8995	4.47e-09	3.15e-07	Treg_IK_StimVSTreg_WT_Stim	ENSMUST00000121776	Gm14078-001
OCR_102451	chr7	103617479	103618536	-1.30108	3.17478	47.7592	4.48e-09	3.15e-07	Treg_IK_StimVSTreg_WT_Stim	ENSMUST00000117302	Gm8329-001
OCR_34964	chr14	36550357	36551238	-1.58959	2.36648	49.1134	4.55e-09	3.18e-07	Treg_IK_StimVSTreg_WT_Stim	ENSMUST00000158743	U7.101-201
OCR_87816	chr5	102366983	102367752	-1.66085	2.53968	50.2724	4.57e-09	3.19e-07	Treg_IK_StimVSTreg_WT_Stim	ENSMUST00000172512	Wdfy3-007
OCR_42663	chr15	91567283	91567753	-1.8149	2.02903	46.7979	4.61e-09	3.21e-07	Treg_IK_StimVSTreg_WT_Stim	ENSMUST00000140734	Lrrk2-002
OCR_68820	chr2	170556992	170557685	-1.67046	1.98133	46.9653	4.6e-09	3.21e-07	Treg_IK_StimVSTreg_WT_Stim	ENSMUST00000029075	Dok5-001
OCR_84125	chr5	4917860	4918877	-1.41842	3.42858	53.6679	4.62e-09	3.21e-07	Treg_IK_StimVSTreg_WT_Stim	ENSMUST00000175418	AC026231.1-201
OCR_8276	chr1	189485519	189486339	-1.64274	2.22344	47.2168	4.69e-09	3.25e-07	Treg_IK_StimVSTreg_WT_Stim	ENSMUST00000152927	Esrrg-005
[truncated: 19,332 more rows]

## Sheet: ex vivo
id	chr	start	end	logFC	logCPM	F	PValue	FDR	comparison	transcript.gene	transcript.id	gene_name
OCR_759	chr1	24619837	24620087	3.48574	5.524	356.898	1.23e-14	1.49e-11	Treg_IK_UnstimVSTreg_WT_Unstim	ENSMUST00000088336+Gm10222-201	ENSMUST00000088336	Gm10222-201
OCR_758	chr1	24619246	24619705	2.47587	5.37236	353.588	2.41e-25	7.14e-21	Treg_IK_UnstimVSTreg_WT_Unstim	ENSMUST00000088336+Gm10222-201	ENSMUST00000088336	Gm10222-201
OCR_43191	chr15	99642552	99643051	2.45562	2.92376	131.233	9.27e-17	2.9e-13	Treg_IK_UnstimVSTreg_WT_Unstim	ENSMUST00000170206+Gm4468-001	ENSMUST00000170206	Gm4468-001
OCR_64204	chr2	84490558	84491260	2.43815	3.55543	172.773	2.42e-19	3.26e-15	Treg_IK_UnstimVSTreg_WT_Unstim	ENSMUST00000066177+Ctnnd1-004	ENSMUST00000066177	Ctnnd1-004
OCR_32818	chr13	112770405	112770797	2.3389	3.0995	144.538	1.21e-17	7.18e-14	Treg_IK_UnstimVSTreg_WT_Unstim	ENSMUST00000142621+Gm15322-001	ENSMUST00000142621	Gm15322-001
OCR_16766	chr11	20706682	20707092	2.15351	1.78524	39.4177	4.25e-08	2.69e-06	Treg_IK_UnstimVSTreg_WT_Unstim	ENSMUST00000144441+1110067D22Rik-003	ENSMUST00000144441	1110067D22Rik-003
OCR_60122	chr2	6611216	6611616	2.12413	2.94057	93.0044	2.95e-13	2.04e-10	Treg_IK_UnstimVSTreg_WT_Unstim	ENSMUST00000002176+Celf2-001	ENSMUST00000002176	Celf2-001
OCR_94555	chr6	87344642	87345584	2.0762	2.70264	85.2895	3.86e-13	2.47e-10	Treg_IK_UnstimVSTreg_WT_Unstim	ENSMUST00000032127+Gkn3-001	ENSMUST00000032127	Gkn3-001
OCR_90923	chr5	151416777	151417196	2.025	2.52292	78.8627	1.53e-12	7.29e-10	Treg_IK_UnstimVSTreg_WT_Unstim	ENSMUST00000016279+N4bp2l1-201	ENSMUST00000016279	N4bp2l1-201
OCR_32588	chr13	109218923	109219334	2.02238	2.4427	76.2444	2.73e-12	1.14e-09	Treg_IK_UnstimVSTreg_WT_Unstim	ENSMUST00000133929+Pde4d-002	ENSMUST00000133929	Pde4d-002
OCR_118548	chrX	163556961	163557887	1.99325	3.73408	147.832	7.46e-18	5.66e-14	Treg_IK_UnstimVSTreg_WT_Unstim	ENSMUST00000146929+Gm15232-001	ENSMUST00000146929	Gm15232-001
OCR_5301	chr1	137560484	137560986	1.96562	2.13006	51.0984	1.38e-09	1.83e-07	Treg_IK_UnstimVSTreg_WT_Unstim	ENSMUST00000112103+Nav1-203	ENSMUST00000112103	Nav1-203
OCR_34084	chr14	21615446	21615793	1.94649	2.7448	82.688	6.69e-13	3.64e-10	Treg_IK_UnstimVSTreg_WT_Unstim	ENSMUST00000071816+Camk2g-201	ENSMUST00000071816	Camk2g-201
OCR_25234	chr12	86549390	86550252	1.92321	3.70215	135.901	4.47e-17	1.77e-13	Treg_IK_UnstimVSTreg_WT_Unstim	ENSMUST00000004910+Eif2b2-001	ENSMUST00000004910	Eif2b2-001
OCR_108355	chr8	79958773	79959397	1.92112	3.59335	93.5473	1.5e-11	4.44e-09	Treg_IK_UnstimVSTreg_WT_Unstim	ENSMUST00000035678+Arhgap10-201	ENSMUST00000035678	Arhgap10-201
OCR_29109	chr13	41733456	41733903	1.91693	2.47499	70.094	1.11e-11	3.4e-09	Treg_IK_UnstimVSTreg_WT_Unstim	ENSMUST00000067176+Gm5082-201	ENSMUST00000067176	Gm5082-201
OCR_108911	chr8	90820814	90821190	1.90688	2.46498	66.0297	2.93e-11	7.55e-09	Treg_IK_UnstimVSTreg_WT_Unstim	ENSMUST00000098521+Adcy7-201	ENSMUST00000098521	Adcy7-201
OCR_64578	chr2	93296752	93297162	1.87599	3.39491	111.026	2.73e-15	4.39e-12	Treg_IK_UnstimVSTreg_WT_Unstim	ENSMUST00000163052+Gm10804-002	ENSMUST00000163052	Gm10804-002
OCR_64222	chr2	84640546	84640869	1.87261	2.43818	47.5854	3.68e-09	4e-07	Treg_IK_UnstimVSTreg_WT_Unstim	ENSMUST00000150325+Ube2l6-002	ENSMUST00000150325	Ube2l6-002
OCR_56484	chr18	73853010	73854069	1.86203	3.66959	25.2074	0.00065974	0.0044959	Treg_IK_UnstimVSTreg_WT_Unstim	ENSMUST00000025393+Smad4-001	ENSMUST00000025393	Smad4-001
OCR_56933	chr18	80881041	80881642	1.85012	3.16351	110.208	3.16e-15	4.81e-12	Treg_IK_UnstimVSTreg_WT_Unstim	ENSMUST00000167977+Nfatc1-203	ENSMUST00000167977	Nfatc1-203
OCR_87052	chr5	77815736	77816300	1.84259	2.59921	62.404	7.12e-11	1.57e-08	Treg_IK_UnstimVSTreg_WT_Unstim	ENSMUST00000072884+Igfbp7-202	ENSMUST00000072884	Igfbp7-202
OCR_45540	chr16	38406804	38407370	1.83899	3.94786	144.75	1.17e-17	7.18e-14	Treg_IK_UnstimVSTreg_WT_Unstim	ENSMUST00000002926+Pla1a-201	ENSMUST00000002926	Pla1a-201
OCR_117842	chrX	102009082	102009531	1.80886	1.80143	42.2935	1.73e-08	1.33e-06	Treg_IK_UnstimVSTreg_WT_Unstim	ENSMUST00000033575+Magee2-001	ENSMUST00000033575	Magee2-001
OCR_110878	chr8	126330887	126331338	1.80827	2.63121	72.3392	6.61e-12	2.2e-09	Treg_IK_UnstimVSTreg_WT_Unstim	ENSMUST00000117702+Rab4a-002	ENSMUST00000117702	Rab4a-002
OCR_63760	chr2	75600734	75601856	1.80639	3.3711	107.283	5.35e-15	7.38e-12	Treg_IK_UnstimVSTreg_WT_Unstim	ENSMUST00000135682+Gm13657-001	ENSMUST00000135682	Gm13657-001
OCR_14204	chr10	98544192	98544888	1.80482	3.42209	107.343	5.29e-15	7.38e-12	Treg_IK_UnstimVSTreg_WT_Unstim	ENSMUST00000020113+Poc1b-001	ENSMUST00000020113	Poc1b-001
OCR_102855	chr7	108787518	108787943	1.78822	1.97097	36.3735	1.08e-07	5.55e-06	Treg_IK_UnstimVSTreg_WT_Unstim	ENSMUST00000137214+Clpb-002	ENSMUST00000137214	Clpb-002
OCR_87009	chr5	77552076	77552335	1.77407	2.2263	46.9827	4.37e-09	4.6e-07	Treg_IK_UnstimVSTreg_WT_Unstim	ENSMUST00000156195+Gm15831-001	ENSMUST00000156195	Gm15831-001
OCR_105064	chr7	148184695	148185725	1.77124	3.45523	111.865	2.36e-15	3.99e-12	Treg_IK_UnstimVSTreg_WT_Unstim	ENSMUST00000026565+Ifitm3-001	ENSMUST00000026565	Ifitm3-001
OCR_101573	chr7	82787130	82787636	1.7487	3.66499	113.048	1.91e-15	3.44e-12	Treg_IK_UnstimVSTreg_WT_Unstim	ENSMUST00000137959+Akap13-007	ENSMUST00000137959	Akap13-007
OCR_36886	chr14	78756223	78757148	1.74324	3.87838	140.058	2.37e-17	1.28e-13	Treg_IK_UnstimVSTreg_WT_Unstim	ENSMUST00000175033+AC126690.2-201	ENSMUST00000175033	AC126690.2-201
OCR_57916	chr19	9069713	9069975	1.74209	1.95123	38.7696	5.07e-08	3.1e-06	Treg_IK_UnstimVSTreg_WT_Unstim	ENSMUST00000043246+Ahnak-201	ENSMUST00000043246	Ahnak-201
OCR_104610	chr7	141967194	141967771	1.74087	2.59054	35.8105	1.49e-06	4.36e-05	Treg_IK_UnstimVSTreg_WT_Unstim	ENSMUST00000084488+Dock1-201	ENSMUST00000084488	Dock1-201
OCR_14263	chr10	99023845	99024706	1.74065	3.96527	139.451	2.59e-17	1.28e-13	Treg_IK_UnstimVSTreg_WT_Unstim	ENSMUST00000167243+Gad1-ps-201	ENSMUST00000167243	Gad1-ps-201
OCR_23002	chr12	31986860	31988750	1.73927	3.92267	119.44	6.38e-16	1.51e-12	Treg_IK_UnstimVSTreg_WT_Unstim	ENSMUST00000172134+Lamb1-007	ENSMUST00000172134	Lamb1-007
OCR_63070	chr2	62486748	62487019	1.73143	2.46252	48.2495	3.05e-09	3.4e-07	Treg_IK_UnstimVSTreg_WT_Unstim	ENSMUST00000176431+Ifih1-005	ENSMUST00000176431	Ifih1-005
OCR_84829	chr5	23895147	23895479	1.73121	3.88047	117.667	8.62e-16	1.83e-12	Treg_IK_UnstimVSTreg_WT_Unstim	ENSMUST00000138716+Atg9b-003	ENSMUST00000138716	Atg9b-003
OCR_16086	chr11	4398799	4399109	1.72901	1.86882	34.5175	1.97e-07	9e-06	Treg_IK_UnstimVSTreg_WT_Unstim	ENSMUST00000144242+Mtmr3-006	ENSMUST00000144242	Mtmr3-006
OCR_9939	chr10	21077626	21078667	1.71062	3.62965	99.8875	2.11e-14	2.23e-11	Treg_IK_UnstimVSTreg_WT_Unstim	ENSMUST00000042699+Aldh8a1-001	ENSMUST00000042699	Aldh8a1-001
OCR_80069	chr4	88769060	88770230	1.70756	4.04483	115.178	2.15e-15	3.75e-12	Treg_IK_UnstimVSTreg_WT_Unstim	ENSMUST00000138655+Gm12602-002	ENSMUST00000138655	Gm12602-002
OCR_87470	chr5	93053341	93053917	1.70053	2.01788	27.3316	2.87e-06	7.16e-05	Treg_IK_UnstimVSTreg_WT_Unstim	ENSMUST00000136004+Ccdc158-003	ENSMUST00000136004	Ccdc158-003
OCR_32204	chr13	103342882	103343866	1.69639	3.29619	93.5599	7.18e-14	6.77e-11	Treg_IK_UnstimVSTreg_WT_Unstim	ENSMUST00000022124+Cd180-001	ENSMUST00000022124	Cd180-001
OCR_54629	chr18	36652106	36652730	1.69619	2.22088	38.7355	5.12e-08	3.13e-06	Treg_IK_UnstimVSTreg_WT_Unstim	ENSMUST00000025363+Hbegf-201	ENSMUST00000025363	Hbegf-201
OCR_97249	chr6	134155623	134156199	1.69191	3.22417	70.7616	1.25e-11	3.78e-09	Treg_IK_UnstimVSTreg_WT_Unstim	ENSMUST00000169529+Etv6-004	ENSMUST00000169529	Etv6-004
OCR_8876	chr10	3231281	3231654	1.67924	2.03378	37.9114	6.75e-08	3.84e-06	Treg_IK_UnstimVSTreg_WT_Unstim	ENSMUST00000150282+Cnksr3-002	ENSMUST00000150282	Cnksr3-002
OCR_73785	chr3	105606471	105606959	1.67494	4.07666	125.037	2.52e-16	6.5e-13	Treg_IK_UnstimVSTreg_WT_Unstim	ENSMUST00000090678+Rap1a-201	ENSMUST00000090678	Rap1a-201
OCR_63402	chr2	69956417	69957661	1.67411	4.7916	188.526	3.34e-20	6.61e-16	Treg_IK_UnstimVSTreg_WT_Unstim	ENSMUST00000112241+Myo3b-001	ENSMUST00000112241	Myo3b-001
OCR_80078	chr4	88809182	88810143	1.672	3.90321	109.719	3.45e-15	5.12e-12	Treg_IK_UnstimVSTreg_WT_Unstim	ENSMUST00000120724+Gm12607-001	ENSMUST00000120724	Gm12607-001
OCR_41143	chr15	66961381	66962016	1.66398	3.9556	131.512	8.87e-17	2.9e-13	Treg_IK_UnstimVSTreg_WT_Unstim	ENSMUST00000092640+St3gal1-202	ENSMUST00000092640	St3gal1-202
OCR_95421	chr6	100752467	100752867	1.65466	3.0133	64.599	4.39e-11	1.05e-08	Treg_IK_UnstimVSTreg_WT_Unstim	ENSMUST00000063854+Ppp4r2-201	ENSMUST00000063854	Ppp4r2-201
OCR_17126	chr11	29925609	29926499	1.65346	4.68278	160.488	1.25e-18	1.23e-14	Treg_IK_UnstimVSTreg_WT_Unstim	ENSMUST00000058902+Eml6-001	ENSMUST00000058902	Eml6-001
OCR_73357	chr3	97465196	97465390	1.64723	2.11781	40.1241	3.34e-08	2.22e-06	Treg_IK_UnstimVSTreg_WT_Unstim	ENSMUST00000130924+Prkab2-003	ENSMUST00000130924	Prkab2-003
OCR_39111	chr15	12360277	12361026	1.64483	3.10522	72.7228	6.05e-12	2.07e-09	Treg_IK_UnstimVSTreg_WT_Unstim	ENSMUST00000165551+Golph3-202	ENSMUST00000165551	Golph3-202
OCR_5534	chr1	140505507	140506181	1.63076	2.49752	52.8033	8.63e-10	1.26e-07	Treg_IK_UnstimVSTreg_WT_Unstim	ENSMUST00000166904+Nek7-202	ENSMUST00000166904	Nek7-202
OCR_78082	chr4	40768529	40769031	1.6218	2.80441	63.2157	5.82e-11	1.31e-08	Treg_IK_UnstimVSTreg_WT_Unstim	ENSMUST00000175068+Mir5123-201	ENSMUST00000175068	Mir5123-201
OCR_93980	chr6	71843201	71843585	1.61558	1.81721	31.4836	5.38e-07	1.97e-05	Treg_IK_UnstimVSTreg_WT_Unstim	ENSMUST00000116815+SNORD94.1-201	ENSMUST00000116815	SNORD94.1-201
OCR_50978	chr17	50320217	50320646	1.61211	2.39331	51.2113	1.33e-09	1.79e-07	Treg_IK_UnstimVSTreg_WT_Unstim	ENSMUST00000156094+Rftn1-003	ENSMUST00000156094	Rftn1-003
OCR_29727	chr13	52998857	53000463	1.6065	3.80088	89.8852	2.79e-13	1.95e-10	Treg_IK_UnstimVSTreg_WT_Unstim	ENSMUST00000137064+Auh-006	ENSMUST00000137064	Auh-006
OCR_33229	chr14	6092592	6093015	1.60214	1.70548	30.8368	6.7e-07	2.35e-05	Treg_IK_UnstimVSTreg_WT_Unstim	ENSMUST00000163885+Gm3248-001	ENSMUST00000163885	Gm3248-001
OCR_29152	chr13	42323927	42324785	1.59699	2.80136	58.6293	1.85e-10	3.45e-08	Treg_IK_UnstimVSTreg_WT_Unstim	ENSMUST00000021796+Edn1-201	ENSMUST00000021796	Edn1-201
OCR_74556	chr3	126317818	126318081	1.5905	1.71331	30.7791	6.84e-07	2.38e-05	Treg_IK_UnstimVSTreg_WT_Unstim	ENSMUST00000066452+Camk2d-015	ENSMUST00000066452	Camk2d-015
OCR_98550	chr7	3658578	3658877	1.58984	2.07059	32.6988	3.58e-07	1.42e-05	Treg_IK_UnstimVSTreg_WT_Unstim	ENSMUST00000136858+Rps9-010	ENSMUST00000136858	Rps9-010
OCR_108340	chr8	79865240	79865656	1.5872	1.70163	23.9869	9.84e-06	0.000183586	Treg_IK_UnstimVSTreg_WT_Unstim	ENSMUST00000158317+U2.48-201	ENSMUST00000158317	U2.48-201
OCR_13874	chr10	94585437	94586130	1.58705	2.6454	45.5451	6.61e-09	6.25e-07	Treg_IK_UnstimVSTreg_WT_Unstim	ENSMUST00000158521+7SK.269-201	ENSMUST00000158521	7SK.269-201
OCR_28365	chr13	24372228	24373505	1.58683	4.56683	147.673	7.64e-18	5.66e-14	Treg_IK_UnstimVSTreg_WT_Unstim	ENSMUST00000140042+Lrrc16a-007	ENSMUST00000140042	Lrrc16a-007
OCR_100349	chr7	52847125	52847819	1.56514	3.52247	76.351	2.66e-12	1.12e-09	Treg_IK_UnstimVSTreg_WT_Unstim	ENSMUST00000123549+0610005C13Rik-003	ENSMUST00000123549	0610005C13Rik-003
OCR_92172	chr6	32745862	32746847	1.56356	3.80587	88.3755	2.75e-13	1.95e-10	Treg_IK_UnstimVSTreg_WT_Unstim	ENSMUST00000129654+Chchd3-010	ENSMUST00000129654	Chchd3-010
OCR_53040	chr17	87701582	87702112	1.55744	3.23821	64.3098	4.45e-11	1.06e-08	Treg_IK_UnstimVSTreg_WT_Unstim	ENSMUST00000127970+Ttc7-004	ENSMUST00000127970	Ttc7-004
OCR_108936	chr8	91173915	91174860	1.55555	4.13908	105.803	7.76e-15	1e-11	Treg_IK_UnstimVSTreg_WT_Unstim	ENSMUST00000109634+Nod2-002	ENSMUST00000109634	Nod2-002
OCR_50979	chr17	50321331	50322253	1.54939	4.06615	111.718	2.42e-15	3.99e-12	Treg_IK_UnstimVSTreg_WT_Unstim	ENSMUST00000156094+Rftn1-003	ENSMUST00000156094	Rftn1-003
OCR_101923	chr7	87922107	87922485	1.54275	1.82469	28.3458	1.59e-06	4.54e-05	Treg_IK_UnstimVSTreg_WT_Unstim	ENSMUST00000032751+Iqgap1-201	ENSMUST00000032751	Iqgap1-201
OCR_44655	chr16	22919981	22920635	1.53988	2.08756	36.3009	1.11e-07	5.64e-06	Treg_IK_UnstimVSTreg_WT_Unstim	ENSMUST00000023587+Fetub-201	ENSMUST00000023587	Fetub-201
OCR_68633	chr2	168317285	168317816	1.53841	2.17623	33.5726	2.68e-07	1.15e-05	Treg_IK_UnstimVSTreg_WT_Unstim	ENSMUST00000151292+Nfatc2-003	ENSMUST00000151292	Nfatc2-003
OCR_37575	chr14	101958312	101959527	1.53657	3.06579	52.6195	1.12e-09	1.58e-07	Treg_IK_UnstimVSTreg_WT_Unstim	ENSMUST00000110796+Tbc1d4-202	ENSMUST00000110796	Tbc1d4-202
OCR_41118	chr15	66722410	66723351	1.53545	4.27439	115.181	1.32e-15	2.61e-12	Treg_IK_UnstimVSTreg_WT_Unstim	ENSMUST00000005255+Wisp1-001	ENSMUST00000005255	Wisp1-001
OCR_22500	chr12	17756931	17757972	1.53531	4.27467	113.76	1.69e-15	3.15e-12	Treg_IK_UnstimVSTreg_WT_Unstim	ENSMUST00000071858+Hpcal1-201	ENSMUST00000071858	Hpcal1-201
OCR_60137	chr2	6650939	6651378	1.53512	2.67913	51.2022	1.34e-09	1.79e-07	Treg_IK_UnstimVSTreg_WT_Unstim	ENSMUST00000126742+Celf2-003	ENSMUST00000126742	Celf2-003
OCR_54186	chr18	24275240	24275499	1.53476	2.40871	36.2454	1.12e-07	5.73e-06	Treg_IK_UnstimVSTreg_WT_Unstim	ENSMUST00000125169+Ino80c-003	ENSMUST00000125169	Ino80c-003
OCR_22458	chr12	17457721	17458123	1.53163	2.43996	44.9458	7.87e-09	7.2e-07	Treg_IK_UnstimVSTreg_WT_Unstim	ENSMUST00000171737+Odc1-202	ENSMUST00000171737	Odc1-202
OCR_96386	chr6	119582714	119583247	1.53154	2.43999	38.7946	5.03e-08	3.08e-06	Treg_IK_UnstimVSTreg_WT_Unstim	ENSMUST00000119369+Wnt5b-001	ENSMUST00000119369	Wnt5b-001
OCR_114614	chr9	83235944	83237020	1.53131	3.96268	104.571	8.78e-15	1.09e-11	Treg_IK_UnstimVSTreg_WT_Unstim	ENSMUST00000168848+Lca5-201	ENSMUST00000168848	Lca5-201
OCR_64568	chr2	93260153	93260432	1.53044	2.54182	46.9141	4.45e-09	4.67e-07	Treg_IK_UnstimVSTreg_WT_Unstim	ENSMUST00000126772+Cd82-010	ENSMUST00000126772	Cd82-010
OCR_29984	chr13	58723839	58724698	1.52846	3.2537	72.3139	6.64e-12	2.2e-09	Treg_IK_UnstimVSTreg_WT_Unstim	ENSMUST00000022036+Slc28a3-001	ENSMUST00000022036	Slc28a3-001
OCR_113944	chr9	66468349	66469139	1.52829	2.48451	40.2157	3.24e-08	2.17e-06	Treg_IK_UnstimVSTreg_WT_Unstim	ENSMUST00000127569+Usp3-001	ENSMUST00000127569	Usp3-001
OCR_117130	chrX	35814061	35814651	1.52716	2.19253	33.9743	2.35e-07	1.04e-05	Treg_IK_UnstimVSTreg_WT_Unstim	ENSMUST00000074913+Lamp2-003	ENSMUST00000074913	Lamp2-003
OCR_54538	chr18	35627219	35627790	1.52643	2.16902	36.5866	1.01e-07	5.25e-06	Treg_IK_UnstimVSTreg_WT_Unstim	ENSMUST00000025215+Sil1-201	ENSMUST00000025215	Sil1-201
OCR_98312	chr6	146828563	146829084	1.5257	2.38666	48.1354	3.15e-09	3.5e-07	Treg_IK_UnstimVSTreg_WT_Unstim	ENSMUST00000016631+Ppfibp1-001	ENSMUST00000016631	Ppfibp1-001
OCR_47221	chr16	78537562	78538032	1.52174	3.949	54.0743	2.4e-07	1.05e-05	Treg_IK_UnstimVSTreg_WT_Unstim	ENSMUST00000114220+D16Ertd472e-001	ENSMUST00000114220	D16Ertd472e-001
OCR_58305	chr19	21180670	21181469	1.52158	3.04108	69.3647	1.32e-11	3.96e-09	Treg_IK_UnstimVSTreg_WT_Unstim	ENSMUST00000039500+Tmc1-202	ENSMUST00000039500	Tmc1-202
OCR_2722	chr1	74341686	74342674	1.52076	5.29117	171.811	2.74e-19	3.26e-15	Treg_IK_UnstimVSTreg_WT_Unstim	ENSMUST00000152603+Tmbim1-004	ENSMUST00000152603	Tmbim1-004
OCR_64359	chr2	90387165	90387837	1.51457	2.92565	59.9564	1.32e-10	2.6e-08	Treg_IK_UnstimVSTreg_WT_Unstim	ENSMUST00000026352+Ptprj-201	ENSMUST00000026352	Ptprj-201
OCR_113021	chr9	45854520	45855458	1.51303	3.05998	72.7402	6.02e-12	2.07e-09	Treg_IK_UnstimVSTreg_WT_Unstim	ENSMUST00000120247+Sik3-004	ENSMUST00000120247	Sik3-004
OCR_41144	chr15	66969992	66971046	1.5124	4.6889	130.88	9.81e-17	2.9e-13	Treg_IK_UnstimVSTreg_WT_Unstim	ENSMUST00000092640+St3gal1-202	ENSMUST00000092640	St3gal1-202
OCR_61794	chr2	35271575	35272580	1.50999	3.21986	58.757	1.83e-10	3.43e-08	Treg_IK_UnstimVSTreg_WT_Unstim	ENSMUST00000171846+Ggta1-205	ENSMUST00000171846	Ggta1-205
OCR_41141	chr15	66947726	66949077	1.5079	4.26932	105.482	8.23e-15	1.04e-11	Treg_IK_UnstimVSTreg_WT_Unstim	ENSMUST00000092640+St3gal1-202	ENSMUST00000092640	St3gal1-202
OCR_98041	chr6	144218785	144219421	1.50513	3.83139	101.297	1.62e-14	1.84e-11	Treg_IK_UnstimVSTreg_WT_Unstim	ENSMUST00000150087+Sox5-011	ENSMUST00000150087	Sox5-011
OCR_79279	chr4	63405893	63406937	1.50447	3.26934	64.4498	4.3e-11	1.03e-08	Treg_IK_UnstimVSTreg_WT_Unstim	ENSMUST00000166244+Tnfsf15-201	ENSMUST00000166244	Tnfsf15-201
OCR_95678	chr6	108259733	108260297	1.5039	2.9936	60.8947	1.04e-10	2.15e-08	Treg_IK_UnstimVSTreg_WT_Unstim	ENSMUST00000166013+Itpr1-206	ENSMUST00000166013	Itpr1-206
OCR_117843	chrX	102009690	102010201	1.50206	2.56749	50.9301	1.44e-09	1.9e-07	Treg_IK_UnstimVSTreg_WT_Unstim	ENSMUST00000033575+Magee2-001	ENSMUST00000033575	Magee2-001
OCR_25288	chr12	87019644	87020449	1.50197	1.98641	28.9489	1.28e-06	3.9e-05	Treg_IK_UnstimVSTreg_WT_Unstim	ENSMUST00000040536+Batf-001	ENSMUST00000040536	Batf-001
OCR_90782	chr5	149561629	149562293	1.49881	3.29957	82.3459	7.19e-13	3.81e-10	Treg_IK_UnstimVSTreg_WT_Unstim	ENSMUST00000122564+n-R5s179-201	ENSMUST00000122564	n-R5s179-201
OCR_46430	chr16	56842984	56843536	1.49638	2.40122	44.9616	7.84e-09	7.19e-07	Treg_IK_UnstimVSTreg_WT_Unstim	ENSMUST00000135672+Tmem45a-002	ENSMUST00000135672	Tmem45a-002
OCR_73373	chr3	97741612	97742180	1.49451	3.52651	83.8937	5.18e-13	3.04e-10	Treg_IK_UnstimVSTreg_WT_Unstim	ENSMUST00000098828+Gm5544-001	ENSMUST00000098828	Gm5544-001
OCR_72850	chr3	89035299	89035807	1.49402	3.68723	81.2977	9.01e-13	4.57e-10	Treg_IK_UnstimVSTreg_WT_Unstim	ENSMUST00000139206+Muc1-003	ENSMUST00000139206	Muc1-003
OCR_12605	chr10	76551943	76552702	1.48502	2.57622	39.1453	5.87e-08	3.44e-06	Treg_IK_UnstimVSTreg_WT_Unstim	ENSMUST00000156009+Col18a1-004	ENSMUST00000156009	Col18a1-004
OCR_70702	chr3	35819821	35820503	1.48269	2.10252	34.4971	1.98e-07	9.04e-06	Treg_IK_UnstimVSTreg_WT_Unstim	ENSMUST00000121632+Dcun1d1-002	ENSMUST00000121632	Dcun1d1-002
OCR_51993	chr17	71318042	71318398	1.48207	2.51357	46.6177	4.85e-09	5e-07	Treg_IK_UnstimVSTreg_WT_Unstim	ENSMUST00000137537+Myl12b-003	ENSMUST00000137537	Myl12b-003
OCR_79731	chr4	83590325	83591027	1.48164	3.52407	75.2275	3.42e-12	1.3e-09	Treg_IK_UnstimVSTreg_WT_Unstim	ENSMUST00000128214+Gm11415-001	ENSMUST00000128214	Gm11415-001
OCR_100369	chr7	53020891	53022070	1.48149	4.02125	100.741	1.79e-14	1.97e-11	Treg_IK_UnstimVSTreg_WT_Unstim	ENSMUST00000075571+Sult2b1-001	ENSMUST00000075571	Sult2b1-001
OCR_115181	chr9	96672458	96672874	1.48006	2.65916	47.5007	3.77e-09	4.07e-07	Treg_IK_UnstimVSTreg_WT_Unstim	ENSMUST00000152594+Zbtb38-003	ENSMUST00000152594	Zbtb38-003
OCR_91213	chr6	8358190	8358735	1.47574	2.3192	35.0528	1.65e-07	7.77e-06	Treg_IK_UnstimVSTreg_WT_Unstim	ENSMUST00000160253+Gm16039-003	ENSMUST00000160253	Gm16039-003
OCR_110014	chr8	114182683	114183296	1.47506	3.21151	49.4405	6.18e-09	5.98e-07	Treg_IK_UnstimVSTreg_WT_Unstim	ENSMUST00000109143+Zfp1-202	ENSMUST00000109143	Zfp1-202
OCR_2390	chr1	66695732	66696517	1.47168	4.1437	87.9239	3.37e-12	1.29e-09	Treg_IK_UnstimVSTreg_WT_Unstim	ENSMUST00000152844+Unc80-002	ENSMUST00000152844	Unc80-002
OCR_40783	chr15	59577728	59578500	1.47124	2.18042	30.4509	7.65e-07	2.6e-05	Treg_IK_UnstimVSTreg_WT_Unstim	ENSMUST00000118228+Trib1-002	ENSMUST00000118228	Trib1-002
OCR_93736	chr6	66487961	66488242	1.47031	3.30179	72.5477	6.3e-12	2.14e-09	Treg_IK_UnstimVSTreg_WT_Unstim	ENSMUST00000135411+Mad2l1-004	ENSMUST00000135411	Mad2l1-004
OCR_4954	chr1	132899570	132900355	1.46991	4.46559	118.338	8.42e-16	1.83e-12	Treg_IK_UnstimVSTreg_WT_Unstim	ENSMUST00000016673+Il10-001	ENSMUST00000016673	Il10-001
OCR_117947	chrX	106315018	106315701	1.46888	2.9764	55.0285	4.75e-10	7.52e-08	Treg_IK_UnstimVSTreg_WT_Unstim	ENSMUST00000119007+Gm14869-001	ENSMUST00000119007	Gm14869-001
OCR_73462	chr3	100240498	100241241	1.46022	4.73556	132.492	9.38e-17	2.9e-13	Treg_IK_UnstimVSTreg_WT_Unstim	ENSMUST00000152827+4930406D18Rik-001	ENSMUST00000152827	4930406D18Rik-001
OCR_12188	chr10	67818431	67819231	1.45685	3.42257	75.5907	3.16e-12	1.25e-09	Treg_IK_UnstimVSTreg_WT_Unstim	ENSMUST00000020106+Arid5b-201	ENSMUST00000020106	Arid5b-201
OCR_1626	chr1	52109805	52110212	1.45588	2.40964	41.5671	2.15e-08	1.57e-06	Treg_IK_UnstimVSTreg_WT_Unstim	ENSMUST00000105087+Gm3940-201	ENSMUST00000105087	Gm3940-201
OCR_56254	chr18	68194107	68195187	1.45563	3.56929	69.0623	2.24e-11	6.08e-09	Treg_IK_UnstimVSTreg_WT_Unstim	ENSMUST00000063775+D18Ertd653e-202	ENSMUST00000063775	D18Ertd653e-202
OCR_100563	chr7	56750064	56750437	1.45134	2.32496	35.6163	1.38e-07	6.76e-06	Treg_IK_UnstimVSTreg_WT_Unstim	ENSMUST00000064383+Nav2-202	ENSMUST00000064383	Nav2-202
OCR_22448	chr12	17396902	17397763	1.44996	3.57319	83.0366	6.21e-13	3.51e-10	Treg_IK_UnstimVSTreg_WT_Unstim	ENSMUST00000175296+Mir3066-201	ENSMUST00000175296	Mir3066-201
OCR_5338	chr1	137826044	137827192	1.44929	2.96	50.83	1.48e-09	1.94e-07	Treg_IK_UnstimVSTreg_WT_Unstim	ENSMUST00000027667+Pkp1-001	ENSMUST00000027667	Pkp1-001
OCR_30025	chr13	59610786	59611814	1.44928	2.81866	49.5691	2.1e-09	2.55e-07	Treg_IK_UnstimVSTreg_WT_Unstim	ENSMUST00000151827+Agtpbp1-022	ENSMUST00000151827	Agtpbp1-022
OCR_79659	chr4	82496451	82496917	1.44803	3.57349	76.0423	2.85e-12	1.16e-09	Treg_IK_UnstimVSTreg_WT_Unstim	ENSMUST00000139401+Zdhhc21-003	ENSMUST00000139401	Zdhhc21-003
OCR_114844	chr9	89100370	89100562	1.44765	1.54647	24.932	5.39e-06	0.000115742	Treg_IK_UnstimVSTreg_WT_Unstim	ENSMUST00000127438+Mthfs-005	ENSMUST00000127438	Mthfs-005
OCR_78343	chr4	45599071	45599640	1.44731	3.00998	65.278	3.51e-11	8.75e-09	Treg_IK_UnstimVSTreg_WT_Unstim	ENSMUST00000119140+Gm12411-001	ENSMUST00000119140	Gm12411-001
OCR_64202	chr2	84475732	84476223	1.44592	2.16946	31.0343	6.27e-07	2.23e-05	Treg_IK_UnstimVSTreg_WT_Unstim	ENSMUST00000126092+Ctnnd1-025	ENSMUST00000126092	Ctnnd1-025
OCR_101917	chr7	87907223	87907528	1.44325	1.963	28.8624	1.32e-06	3.98e-05	Treg_IK_UnstimVSTreg_WT_Unstim	ENSMUST00000032751+Iqgap1-201	ENSMUST00000032751	Iqgap1-201
OCR_99069	chr7	19946374	19946667	1.44129	3.34584	63.4339	5.52e-11	1.25e-08	Treg_IK_UnstimVSTreg_WT_Unstim	ENSMUST00000047621+Ppp1r13l-001	ENSMUST00000047621	Ppp1r13l-001
OCR_39026	chr15	11163444	11164718	1.44084	4.05128	99.4614	2.29e-14	2.38e-11	Treg_IK_UnstimVSTreg_WT_Unstim	ENSMUST00000158679+SNORA17.560-201	ENSMUST00000158679	SNORA17.560-201
OCR_9927	chr10	21024487	21025262	1.44001	3.17751	50.0132	1.86e-09	2.32e-07	Treg_IK_UnstimVSTreg_WT_Unstim	ENSMUST00000092674+Hbs1l-202	ENSMUST00000092674	Hbs1l-202
OCR_73243	chr3	95897424	95897823	1.43996	2.19014	30.3655	7.87e-07	2.65e-05	Treg_IK_UnstimVSTreg_WT_Unstim	ENSMUST00000132980+Otud7b-004	ENSMUST00000132980	Otud7b-004
OCR_52539	chr17	80565190	80565547	1.43017	2.89337	52.5061	9.36e-10	1.36e-07	Treg_IK_UnstimVSTreg_WT_Unstim	ENSMUST00000133955+Galm-002	ENSMUST00000133955	Galm-002
OCR_60025	chr2	5771820	5772687	1.42661	2.32141	28.915	1.32e-06	3.98e-05	Treg_IK_UnstimVSTreg_WT_Unstim	ENSMUST00000128604+Nudt5-004	ENSMUST00000128604	Nudt5-004
OCR_66409	chr2	132495817	132496453	1.42569	4.10242	102.174	1.37e-14	1.63e-11	Treg_IK_UnstimVSTreg_WT_Unstim	ENSMUST00000117769+Gm14099-001	ENSMUST00000117769	Gm14099-001
OCR_23265	chr12	36251269	36251481	1.425	1.25513	17.8132	8.35e-05	0.000920175	Treg_IK_UnstimVSTreg_WT_Unstim	ENSMUST00000116436+Ahr-001	ENSMUST00000116436	Ahr-001
OCR_8618	chr1	193718188	193718770	1.42142	2.56052	40.0553	3.41e-08	2.26e-06	Treg_IK_UnstimVSTreg_WT_Unstim	ENSMUST00000154116+1700034H15Rik-004	ENSMUST00000154116	1700034H15Rik-004
OCR_114804	chr9	88203985	88204712	1.42039	3.60561	73.9495	4.57e-12	1.67e-09	Treg_IK_UnstimVSTreg_WT_Unstim	ENSMUST00000034992+Nt5e-201	ENSMUST00000034992	Nt5e-201
OCR_32578	chr13	109127947	109129097	1.42017	3.2253	62.4675	7.01e-11	1.55e-08	Treg_IK_UnstimVSTreg_WT_Unstim	ENSMUST00000167413+Depdc1b-005	ENSMUST00000167413	Depdc1b-005
OCR_42925	chr15	96470128	96470301	1.41926	2.26714	32.5771	3.73e-07	1.46e-05	Treg_IK_UnstimVSTreg_WT_Unstim	ENSMUST00000100262+Slc38a1-203	ENSMUST00000100262	Slc38a1-203
OCR_41149	chr15	66984849	66985777	1.41812	3.21865	62.228	7.44e-11	1.61e-08	Treg_IK_UnstimVSTreg_WT_Unstim	ENSMUST00000092640+St3gal1-202	ENSMUST00000092640	St3gal1-202
OCR_118490	chrX	162610073	162610419	1.41774	2.57011	38.5771	5.38e-08	3.23e-06	Treg_IK_UnstimVSTreg_WT_Unstim	ENSMUST00000087169+Gemin8-002	ENSMUST00000087169	Gemin8-002
OCR_39904	chr15	36659315	36659543	1.41687	1.83843	21.9469	1.65e-05	0.00026968	Treg_IK_UnstimVSTreg_WT_Unstim	ENSMUST00000126184+Ywhaz-006	ENSMUST00000126184	Ywhaz-006
OCR_88552	chr5	113537046	113537893	1.41393	3.70065	82.9708	6.3e-13	3.52e-10	Treg_IK_UnstimVSTreg_WT_Unstim	ENSMUST00000119627+Crybb3-001	ENSMUST00000119627	Crybb3-001
OCR_81795	chr4	124446078	124446721	1.4136	2.92394	53.452	7.24e-10	1.08e-07	Treg_IK_UnstimVSTreg_WT_Unstim	ENSMUST00000145359+Inpp5b-006	ENSMUST00000145359	Inpp5b-006
OCR_74722	chr3	129360071	129360413	1.41324	2.11405	32.8294	3.43e-07	1.38e-05	Treg_IK_UnstimVSTreg_WT_Unstim	ENSMUST00000174960+AC098732.1-201	ENSMUST00000174960	AC098732.1-201
OCR_9388	chr10	12700708	12701258	1.4102	3.36419	69.4959	1.28e-11	3.86e-09	Treg_IK_UnstimVSTreg_WT_Unstim	ENSMUST00000042861+Stx11-201	ENSMUST00000042861	Stx11-201
OCR_13870	chr10	94574710	94576101	1.40896	3.90979	85.7914	3.48e-13	2.29e-10	Treg_IK_UnstimVSTreg_WT_Unstim	ENSMUST00000158521+7SK.269-201	ENSMUST00000158521	7SK.269-201
OCR_50590	chr17	44745844	44746359	1.40839	2.72099	45.1335	7.45e-09	6.9e-07	Treg_IK_UnstimVSTreg_WT_Unstim	ENSMUST00000093699+n-R5s27-201	ENSMUST00000093699	n-R5s27-201
OCR_11699	chr10	59372356	59372552	1.40553	1.8678	23.1093	1.06e-05	0.00019363	Treg_IK_UnstimVSTreg_WT_Unstim	ENSMUST00000020309+Dnajb12-005	ENSMUST00000020309	Dnajb12-005
OCR_21864	chr12	3759402	3759803	1.40464	2.54695	37.4162	7.75e-08	4.29e-06	Treg_IK_UnstimVSTreg_WT_Unstim	ENSMUST00000173847+Gm20448-001	ENSMUST00000173847	Gm20448-001
OCR_36872	chr14	78674731	78676540	1.40463	3.40568	60.2406	1.5e-10	2.88e-08	Treg_IK_UnstimVSTreg_WT_Unstim	ENSMUST00000116752+AC126690.1-201	ENSMUST00000116752	AC126690.1-201
OCR_95682	chr6	108275865	108276294	1.40388	2.88893	49.0244	2.55e-09	2.96e-07	Treg_IK_UnstimVSTreg_WT_Unstim	ENSMUST00000166013+Itpr1-206	ENSMUST00000166013	Itpr1-206
OCR_106523	chr8	32297239	32298375	1.40225	4.83125	138.219	3.13e-17	1.43e-13	Treg_IK_UnstimVSTreg_WT_Unstim	ENSMUST00000066173+Fut10-002	ENSMUST00000066173	Fut10-002
OCR_66951	chr2	144039555	144039908	1.4019	2.04907	28.147	1.7e-06	4.8e-05	Treg_IK_UnstimVSTreg_WT_Unstim	ENSMUST00000099292+Gm5535-001	ENSMUST00000099292	Gm5535-001
OCR_39110	chr15	12359438	12360041	1.40185	2.57152	41.4098	2.25e-08	1.62e-06	Treg_IK_UnstimVSTreg_WT_Unstim	ENSMUST00000165551+Golph3-202	ENSMUST00000165551	Golph3-202
OCR_24324	chr12	70537778	70538601	1.39976	2.8935	41.5265	3.13e-08	2.11e-06	Treg_IK_UnstimVSTreg_WT_Unstim	ENSMUST00000053451+Gm9887-201	ENSMUST00000053451	Gm9887-201
OCR_57278	chr18	84896219	84897474	1.39955	4.77699	115.774	1.19e-15	2.44e-12	Treg_IK_UnstimVSTreg_WT_Unstim	ENSMUST00000161033+Fam69c-003	ENSMUST00000161033	Fam69c-003
OCR_41119	chr15	66723848	66724175	1.39877	1.8093	26.4969	3.06e-06	7.53e-05	Treg_IK_UnstimVSTreg_WT_Unstim	ENSMUST00000118823+Wisp1-003	ENSMUST00000118823	Wisp1-003
OCR_73691	chr3	103711223	103712064	1.39725	4.20362	98.9522	2.52e-14	2.58e-11	Treg_IK_UnstimVSTreg_WT_Unstim	ENSMUST00000116162+Gm15602-001	ENSMUST00000116162	Gm15602-001
OCR_103117	chr7	116134040	116135174	1.3967	3.5906	48.8975	2.01e-08	1.5e-06	Treg_IK_UnstimVSTreg_WT_Unstim	ENSMUST00000033341+Tub-001	ENSMUST00000033341	Tub-001
OCR_42243	chr15	83999034	83999544	1.39529	2.85545	46.4494	5.09e-09	5.16e-07	Treg_IK_UnstimVSTreg_WT_Unstim	ENSMUST00000045289+Pnpla3-201	ENSMUST00000045289	Pnpla3-201
OCR_91045	chr6	5205379	5206699	1.39455	4.11856	90.5112	1.32e-13	1.06e-10	Treg_IK_UnstimVSTreg_WT_Unstim	ENSMUST00000176039+Pon3-006	ENSMUST00000176039	Pon3-006
OCR_29957	chr13	58218035	58218518	1.39353	2.72186	46.0403	5.73e-09	5.71e-07	Treg_IK_UnstimVSTreg_WT_Unstim	ENSMUST00000160860+Klhl3-001	ENSMUST00000160860	Klhl3-001
OCR_10757	chr10	39211808	39212317	1.39347	3.08899	59.7615	1.39e-10	2.7e-08	Treg_IK_UnstimVSTreg_WT_Unstim	ENSMUST00000136659+Fyn-008	ENSMUST00000136659	Fyn-008
OCR_13885	chr10	94672589	94673165	1.39076	2.25195	32.3305	4.05e-07	1.57e-05	Treg_IK_UnstimVSTreg_WT_Unstim	ENSMUST00000099332+Cradd-202	ENSMUST00000099332	Cradd-202
OCR_89381	chr5	124930221	124930486	1.38888	2.18241	24.3983	6.56e-06	0.000134369	Treg_IK_UnstimVSTreg_WT_Unstim	ENSMUST00000031347+Rilpl2-001	ENSMUST00000031347	Rilpl2-001
OCR_56961	chr18	81055144	81055818	1.38766	2.94611	48.6768	2.7e-09	3.1e-07	Treg_IK_UnstimVSTreg_WT_Unstim	ENSMUST00000175232+AC117949.1-201	ENSMUST00000175232	AC117949.1-201
OCR_53057	chr17	87817084	87818116	1.38718	3.55281	76.0614	2.84e-12	1.16e-09	Treg_IK_UnstimVSTreg_WT_Unstim	ENSMUST00000040609+1700011E24Rik-201	ENSMUST00000040609	1700011E24Rik-201
OCR_50817	chr17	47701249	47702030	1.38539	2.92084	45.5997	6.51e-09	6.19e-07	Treg_IK_UnstimVSTreg_WT_Unstim	ENSMUST00000037333+Ccnd3-201	ENSMUST00000037333	Ccnd3-201
OCR_91455	chr6	15687621	15687875	1.38315	1.86959	25.2227	4.85e-06	0.000106812	Treg_IK_UnstimVSTreg_WT_Unstim	ENSMUST00000128849+Mdfic-005	ENSMUST00000128849	Mdfic-005
OCR_108912	chr8	90821787	90822502	1.38268	4.02924	76.4724	2.59e-12	1.1e-09	Treg_IK_UnstimVSTreg_WT_Unstim	ENSMUST00000098521+Adcy7-201	ENSMUST00000098521	Adcy7-201
OCR_42774	chr15	93431368	93431725	1.38049	3.02145	52.1093	1.04e-09	1.49e-07	Treg_IK_UnstimVSTreg_WT_Unstim	ENSMUST00000048982+Prickle1-001	ENSMUST00000048982	Prickle1-001
OCR_52972	chr17	86906623	86907366	1.37823	2.77671	48.0273	3.24e-09	3.6e-07	Treg_IK_UnstimVSTreg_WT_Unstim	ENSMUST00000095186+Gm10309-201	ENSMUST00000095186	Gm10309-201
OCR_15114	chr10	117877676	117878516	1.37815	2.87913	50.8379	1.48e-09	1.94e-07	Treg_IK_UnstimVSTreg_WT_Unstim	ENSMUST00000068592+Ifng-201	ENSMUST00000068592	Ifng-201
OCR_62352	chr2	49599855	49600802	1.37532	3.53849	64.7766	3.97e-11	9.69e-09	Treg_IK_UnstimVSTreg_WT_Unstim	ENSMUST00000127245+Kif5c-005	ENSMUST00000127245	Kif5c-005
OCR_117002	chrX	19803527	19804414	1.37441	2.47027	34.6002	1.96e-07	8.99e-06	Treg_IK_UnstimVSTreg_WT_Unstim	ENSMUST00000120423+Gm9083-001	ENSMUST00000120423	Gm9083-001
OCR_71782	chr3	60615860	60616217	1.37407	1.68215	21.9772	1.63e-05	0.000267797	Treg_IK_UnstimVSTreg_WT_Unstim	ENSMUST00000099086+Gm8325-201	ENSMUST00000099086	Gm8325-201
OCR_45532	chr16	38371877	38372341	1.36987	2.31967	25.5281	7.81e-06	0.000153965	Treg_IK_UnstimVSTreg_WT_Unstim	ENSMUST00000146342+Popdc2-005	ENSMUST00000146342	Popdc2-005
OCR_117767	chrX	98932516	98933094	1.36979	2.86867	49.1975	2.33e-09	2.75e-07	Treg_IK_UnstimVSTreg_WT_Unstim	ENSMUST00000056614+Cxcr3-001	ENSMUST00000056614	Cxcr3-001
OCR_96567	chr6	122220120	122220598	1.36852	2.80614	37.1759	2.08e-07	9.36e-06	Treg_IK_UnstimVSTreg_WT_Unstim	ENSMUST00000032207+Klrg1-001	ENSMUST00000032207	Klrg1-001
OCR_51630	chr17	64971057	64972316	1.36755	4.09507	87.4801	2.45e-13	1.8e-10	Treg_IK_UnstimVSTreg_WT_Unstim	ENSMUST00000086723+Man2a1-001	ENSMUST00000086723	Man2a1-001
OCR_101721	chr7	85829597	85830252	1.36744	2.62817	40.9408	2.6e-08	1.82e-06	Treg_IK_UnstimVSTreg_WT_Unstim	ENSMUST00000032841+Mrpl46-001	ENSMUST00000032841	Mrpl46-001
OCR_88557	chr5	113561500	113561932	1.36729	2.11836	27.0623	2.5e-06	6.45e-05	Treg_IK_UnstimVSTreg_WT_Unstim	ENSMUST00000050125+2900026A02Rik-001	ENSMUST00000050125	2900026A02Rik-001
OCR_15055	chr10	117304349	117304715	1.3654	1.79678	26.7757	2.77e-06	6.96e-05	Treg_IK_UnstimVSTreg_WT_Unstim	ENSMUST00000064667+Rap1b-201	ENSMUST00000064667	Rap1b-201
OCR_65835	chr2	122181945	122182290	1.36466	1.74041	21.4873	1.96e-05	0.000307619	Treg_IK_UnstimVSTreg_WT_Unstim	ENSMUST00000143484+Shf-009	ENSMUST00000143484	Shf-009
OCR_55837	chr18	61383703	61384329	1.36458	2.32652	27.8835	1.87e-06	5.15e-05	Treg_IK_UnstimVSTreg_WT_Unstim	ENSMUST00000163174+Pde6a-201	ENSMUST00000163174	Pde6a-201
OCR_45302	chr16	33756145	33756441	1.3644	1.92799	23.2572	1e-05	0.000185808	Treg_IK_UnstimVSTreg_WT_Unstim	ENSMUST00000146518+Heg1-004	ENSMUST00000146518	Heg1-004
OCR_15775	chr10	127196517	127197012	1.36355	2.95186	50.0853	1.82e-09	2.3e-07	Treg_IK_UnstimVSTreg_WT_Unstim	ENSMUST00000073639+Rdh1-001	ENSMUST00000073639	Rdh1-001
OCR_36893	chr14	78816886	78817208	1.36113	1.97483	23.421	9.43e-06	0.00017729	Treg_IK_UnstimVSTreg_WT_Unstim	ENSMUST00000175033+AC126690.2-201	ENSMUST00000175033	AC126690.2-201
OCR_50609	chr17	44850985	44851440	1.3606	2.77619	48.9603	2.49e-09	2.9e-07	Treg_IK_UnstimVSTreg_WT_Unstim	ENSMUST00000161664+9530072K05Rik-001	ENSMUST00000161664	9530072K05Rik-001
OCR_109352	chr8	97327427	97327833	1.35752	2.11615	28.303	1.61e-06	4.59e-05	Treg_IK_UnstimVSTreg_WT_Unstim	ENSMUST00000034232+Ccl17-201	ENSMUST00000034232	Ccl17-201
OCR_80563	chr4	100896354	100896672	1.35716	1.78336	19.3371	4.7e-05	0.000595539	Treg_IK_UnstimVSTreg_WT_Unstim	ENSMUST00000122052+Gm12785-001	ENSMUST00000122052	Gm12785-001
OCR_36895	chr14	78819739	78820797	1.35703	3.81735	77.417	2.1e-12	9.1e-10	Treg_IK_UnstimVSTreg_WT_Unstim	ENSMUST00000175033+AC126690.2-201	ENSMUST00000175033	AC126690.2-201
OCR_95932	chr6	113593087	113593323	1.35564	2.11332	27.1484	2.42e-06	6.28e-05	Treg_IK_UnstimVSTreg_WT_Unstim	ENSMUST00000089022+Irak2-004	ENSMUST00000089022	Irak2-004
OCR_95366	chr6	99783367	99783882	1.3549	1.99839	24.0582	7.44e-06	0.000148185	Treg_IK_UnstimVSTreg_WT_Unstim	ENSMUST00000121046+Tpt1-ps3-001	ENSMUST00000121046	Tpt1-ps3-001
OCR_80105	chr4	89171937	89172588	1.35464	3.38465	63.9243	4.89e-11	1.15e-08	Treg_IK_UnstimVSTreg_WT_Unstim	ENSMUST00000122013+Gm12608-001	ENSMUST00000122013	Gm12608-001
OCR_60087	chr2	6478633	6479389	1.35456	3.31098	64.6212	4.12e-11	9.98e-09	Treg_IK_UnstimVSTreg_WT_Unstim	ENSMUST00000168146+Celf2-203	ENSMUST00000168146	Celf2-203
OCR_59626	chr19	57130010	57130672	1.35404	3.25353	57.9427	2.21e-10	3.99e-08	Treg_IK_UnstimVSTreg_WT_Unstim	ENSMUST00000137389+Ablim1-011	ENSMUST00000137389	Ablim1-011
OCR_96570	chr6	122233362	122234101	1.35362	3.00113	49.8891	1.92e-09	2.38e-07	Treg_IK_UnstimVSTreg_WT_Unstim	ENSMUST00000032207+Klrg1-001	ENSMUST00000032207	Klrg1-001
OCR_1427	chr1	43528132	43528501	1.35257	3.3987	67.1892	2.21e-11	6.02e-09	Treg_IK_UnstimVSTreg_WT_Unstim	ENSMUST00000124817+Nck2-004	ENSMUST00000124817	Nck2-004
OCR_2120	chr1	60959982	60960138	1.35222	1.90809	26.8186	2.72e-06	6.88e-05	Treg_IK_UnstimVSTreg_WT_Unstim	ENSMUST00000121555+Rpl18-ps1-001	ENSMUST00000121555	Rpl18-ps1-001
OCR_88867	chr5	117916981	117917838	1.35139	3.32887	60.9948	1.01e-10	2.11e-08	Treg_IK_UnstimVSTreg_WT_Unstim	ENSMUST00000103237+Ksr2-202	ENSMUST00000103237	Ksr2-202
OCR_22462	chr12	17512478	17513059	1.34897	4.06732	90.821	1.24e-13	1.02e-10	Treg_IK_UnstimVSTreg_WT_Unstim	ENSMUST00000171737+Odc1-202	ENSMUST00000171737	Odc1-202
OCR_7168	chr1	172014119	172014921	1.3486	3.09697	30.1981	8.19e-06	0.000159666	Treg_IK_UnstimVSTreg_WT_Unstim	ENSMUST00000170800+Ddr2-202	ENSMUST00000170800	Ddr2-202
OCR_12181	chr10	67738118	67738481	1.34851	3.38354	58.2814	2.03e-10	3.71e-08	Treg_IK_UnstimVSTreg_WT_Unstim	ENSMUST00000020106+Arid5b-201	ENSMUST00000020106	Arid5b-201
OCR_32931	chr13	114035174	114035825	1.34844	2.79739	45.8157	6.11e-09	5.95e-07	Treg_IK_UnstimVSTreg_WT_Unstim	ENSMUST00000122399+Gzmk-002	ENSMUST00000122399	Gzmk-002
OCR_12057	chr10	66563537	66563876	1.3452	4.19516	100.782	1.78e-14	1.97e-11	Treg_IK_UnstimVSTreg_WT_Unstim	ENSMUST00000020023+Reep3-201	ENSMUST00000020023	Reep3-201
OCR_27438	chr13	6190786	6191607	1.3423	3.1534	41.8053	3.59e-08	2.35e-06	Treg_IK_UnstimVSTreg_WT_Unstim	ENSMUST00000104778+AC154816.1-201	ENSMUST00000104778	AC154816.1-201
OCR_24932	chr12	80701083	80701740	1.34137	3.53493	68.1307	1.77e-11	5.02e-09	Treg_IK_UnstimVSTreg_WT_Unstim	ENSMUST00000167126+Rad51l1-203	ENSMUST00000167126	Rad51l1-203
OCR_33097	chr13	117751349	117751849	1.34099	2.61288	33.627	3.15e-07	1.3e-05	Treg_IK_UnstimVSTreg_WT_Unstim	ENSMUST00000022239+Parp8-201	ENSMUST00000022239	Parp8-201
OCR_63474	chr2	71112383	71112956	1.34067	2.72849	41.7177	2.05e-08	1.52e-06	Treg_IK_UnstimVSTreg_WT_Unstim	ENSMUST00000130715+Slc25a12-006	ENSMUST00000130715	Slc25a12-006
OCR_110208	chr8	118266374	118267102	1.33663	3.89074	80.1574	1.15e-12	5.75e-10	Treg_IK_UnstimVSTreg_WT_Unstim	ENSMUST00000109104+Maf-002	ENSMUST00000109104	Maf-002
OCR_11369	chr10	53063620	53064052	1.33311	2.39268	29.6534	1.31e-06	3.95e-05	Treg_IK_UnstimVSTreg_WT_Unstim	ENSMUST00000105471+Gm10942-201	ENSMUST00000105471	Gm10942-201
OCR_113027	chr9	45918319	45919067	1.33209	2.96986	51.4768	1.24e-09	1.71e-07	Treg_IK_UnstimVSTreg_WT_Unstim	ENSMUST00000122865+Sik3-002	ENSMUST00000122865	Sik3-002
OCR_107489	chr8	60067824	60068639	1.33053	4.23591	57.2794	2.17e-08	1.58e-06	Treg_IK_UnstimVSTreg_WT_Unstim	ENSMUST00000145057+Gm10284-001	ENSMUST00000145057	Gm10284-001
OCR_58320	chr19	21581717	21582697	1.32987	3.63973	74.5062	4.03e-12	1.5e-09	Treg_IK_UnstimVSTreg_WT_Unstim	ENSMUST00000121725+Gda-003	ENSMUST00000121725	Gda-003
OCR_93777	chr6	67077757	67078329	1.32981	2.53647	38.6768	5.22e-08	3.16e-06	Treg_IK_UnstimVSTreg_WT_Unstim	ENSMUST00000169018+A430010J10Rik-202	ENSMUST00000169018	A430010J10Rik-202
OCR_88627	chr5	114424300	114425701	1.32814	3.543	56.4113	3.3e-10	5.51e-08	Treg_IK_UnstimVSTreg_WT_Unstim	ENSMUST00000162396+Ssh1-005	ENSMUST00000162396	Ssh1-005
OCR_36400	chr14	69954852	69955938	1.32644	5.44879	132.775	8.47e-17	2.9e-13	Treg_IK_UnstimVSTreg_WT_Unstim	ENSMUST00000134997+Gm16677-201	ENSMUST00000134997	Gm16677-201
OCR_58354	chr19	21892427	21893055	1.32616	1.81586	19.8403	3.72e-05	0.000497505	Treg_IK_UnstimVSTreg_WT_Unstim	ENSMUST00000025663+Tmem2-201	ENSMUST00000025663	Tmem2-201
OCR_82062	chr4	129185050	129185847	1.3232	3.38285	54.5738	5.36e-10	8.31e-08	Treg_IK_UnstimVSTreg_WT_Unstim	ENSMUST00000145488+Gm12979-001	ENSMUST00000145488	Gm12979-001
OCR_99853	chr7	36527223	36527978	1.32187	3.24873	49.3095	2.26e-09	2.69e-07	Treg_IK_UnstimVSTreg_WT_Unstim	ENSMUST00000124116+Dpy19l3-002	ENSMUST00000124116	Dpy19l3-002
OCR_91254	chr6	8727354	8728692	1.31917	4.54449	101.637	1.52e-14	1.76e-11	Treg_IK_UnstimVSTreg_WT_Unstim	ENSMUST00000115521+Ica1-201	ENSMUST00000115521	Ica1-201
OCR_27076	chr12	117832290	117832642	1.31832	2.61255	35.3735	1.49e-07	7.19e-06	Treg_IK_UnstimVSTreg_WT_Unstim	ENSMUST00000084823+Ptprn2-202	ENSMUST00000084823	Ptprn2-202
OCR_28435	chr13	25054005	25054429	1.31746	2.91643	46.0724	5.68e-09	5.68e-07	Treg_IK_UnstimVSTreg_WT_Unstim	ENSMUST00000128315+Gpld1-002	ENSMUST00000128315	Gpld1-002
OCR_37128	chr14	87261109	87262056	1.31639	4.55294	108.77	4.09e-15	5.92e-12	Treg_IK_UnstimVSTreg_WT_Unstim	ENSMUST00000172008+Diap3-204	ENSMUST00000172008	Diap3-204
OCR_63586	chr2	72706082	72707027	1.31187	3.03222	41.1674	2.43e-08	1.72e-06	Treg_IK_UnstimVSTreg_WT_Unstim	ENSMUST00000148327+6430710C18Rik-002	ENSMUST00000148327	6430710C18Rik-002
OCR_111785	chr9	15343433	15343961	1.31172	2.68909	34.2492	2.87e-07	1.21e-05	Treg_IK_UnstimVSTreg_WT_Unstim	ENSMUST00000045620+BC017612-201	ENSMUST00000045620	BC017612-201
OCR_29084	chr13	41451022	41451226	1.31053	2.44158	36.5974	1.01e-07	5.24e-06	Treg_IK_UnstimVSTreg_WT_Unstim	ENSMUST00000172137+Nedd9-204	ENSMUST00000172137	Nedd9-204
OCR_40856	chr15	61875114	61875906	1.31032	4.28174	94.8963	5.52e-14	5.46e-11	Treg_IK_UnstimVSTreg_WT_Unstim	ENSMUST00000165627+Pvt1-202	ENSMUST00000165627	Pvt1-202
OCR_26628	chr12	111941157	111941892	1.30881	3.28568	53.3466	7.45e-10	1.11e-07	Treg_IK_UnstimVSTreg_WT_Unstim	ENSMUST00000155242+Hsp90aa1-006	ENSMUST00000155242	Hsp90aa1-006
OCR_36396	chr14	69902186	69903502	1.30707	6.88036	134.871	7.88e-13	4.14e-10	Treg_IK_UnstimVSTreg_WT_Unstim	ENSMUST00000037064+Slc25a37-201	ENSMUST00000037064	Slc25a37-201
OCR_36884	chr14	78751348	78751894	1.30652	3.06882	53.9899	6.27e-10	9.61e-08	Treg_IK_UnstimVSTreg_WT_Unstim	ENSMUST00000175033+AC126690.2-201	ENSMUST00000175033	AC126690.2-201
OCR_9941	chr10	21085409	21086794	1.30637	4.47057	92.7099	8.52e-14	7.77e-11	Treg_IK_UnstimVSTreg_WT_Unstim	ENSMUST00000042699+Aldh8a1-001	ENSMUST00000042699	Aldh8a1-001
OCR_61575	chr2	32278725	32279947	1.305	5.32836	137.45	3.52e-17	1.49e-13	Treg_IK_UnstimVSTreg_WT_Unstim	ENSMUST00000113307+Slc25a25-003	ENSMUST00000113307	Slc25a25-003
OCR_87050	chr5	77812923	77813864	1.30451	3.67112	66.8707	2.39e-11	6.43e-09	Treg_IK_UnstimVSTreg_WT_Unstim	ENSMUST00000072884+Igfbp7-202	ENSMUST00000072884	Igfbp7-202
OCR_59879	chr2	3581183	3581888	1.30316	2.53954	33.6365	2.62e-07	1.13e-05	Treg_IK_UnstimVSTreg_WT_Unstim	ENSMUST00000118615+Gm13183-001	ENSMUST00000118615	Gm13183-001
OCR_117041	chrX	23400497	23401189	1.30307	1.96891	22.9264	1.14e-05	0.00020365	Treg_IK_UnstimVSTreg_WT_Unstim	ENSMUST00000062738+Gm4907-201	ENSMUST00000062738	Gm4907-201
OCR_32344	chr13	105416801	105417030	1.30099	2.34618	29.4712	1.07e-06	3.37e-05	Treg_IK_UnstimVSTreg_WT_Unstim	ENSMUST00000131215+2610204G07Rik-001	ENSMUST00000131215	2610204G07Rik-001
OCR_86140	chr5	53990346	53990766	1.30005	2.56358	37.8254	6.81e-08	3.87e-06	Treg_IK_UnstimVSTreg_WT_Unstim	ENSMUST00000113865+Rbpj-203	ENSMUST00000113865	Rbpj-203
OCR_117629	chrX	91787080	91787905	1.29945	3.4724	60.9561	1.02e-10	2.13e-08	Treg_IK_UnstimVSTreg_WT_Unstim	ENSMUST00000153386+Maged1-002	ENSMUST00000153386	Maged1-002
OCR_90065	chr5	137428684	137429447	1.29783	4.27615	90.4602	1.33e-13	1.06e-10	Treg_IK_UnstimVSTreg_WT_Unstim	ENSMUST00000111094+Fis1-002	ENSMUST00000111094	Fis1-002
OCR_45690	chr16	43661626	43662049	1.29671	3.9976	70.685	1.89e-11	5.3e-09	Treg_IK_UnstimVSTreg_WT_Unstim	ENSMUST00000096065+Tigit-201	ENSMUST00000096065	Tigit-201
OCR_14203	chr10	98538702	98539505	1.29554	2.42517	29.28	1.14e-06	3.55e-05	Treg_IK_UnstimVSTreg_WT_Unstim	ENSMUST00000020113+Poc1b-001	ENSMUST00000020113	Poc1b-001
OCR_40377	chr15	51562201	51562953	1.29483	2.87943	41.7372	2.04e-08	1.51e-06	Treg_IK_UnstimVSTreg_WT_Unstim	ENSMUST00000090034+Eif3h-202	ENSMUST00000090034	Eif3h-202
OCR_45698	chr16	43700753	43701100	1.29466	3.39033	53.4096	9.92e-10	1.43e-07	Treg_IK_UnstimVSTreg_WT_Unstim	ENSMUST00000096065+Tigit-201	ENSMUST00000096065	Tigit-201
OCR_46359	chr16	55734392	55734937	1.29385	3.49776	47.3749	1.81e-08	1.38e-06	Treg_IK_UnstimVSTreg_WT_Unstim	ENSMUST00000157825+U6.711-201	ENSMUST00000157825	U6.711-201
OCR_96565	chr6	122212504	122213229	1.29104	3.12439	50.1351	1.8e-09	2.29e-07	Treg_IK_UnstimVSTreg_WT_Unstim	ENSMUST00000032207+Klrg1-001	ENSMUST00000032207	Klrg1-001
OCR_96353	chr6	119180904	119181412	1.29032	2.00185	22.695	1.24e-05	0.000217475	Treg_IK_UnstimVSTreg_WT_Unstim	ENSMUST00000037434+Cacna2d4-201	ENSMUST00000037434	Cacna2d4-201
OCR_5172	chr1	135641631	135642459	1.2888	2.59683	35.2201	1.56e-07	7.46e-06	Treg_IK_UnstimVSTreg_WT_Unstim	ENSMUST00000112264+Atp2b4-002	ENSMUST00000112264	Atp2b4-002
OCR_50267	chr17	35367982	35368498	1.28829	3.45432	60.4298	1.17e-10	2.33e-08	Treg_IK_UnstimVSTreg_WT_Unstim	ENSMUST00000146711+Atp6v1g2-002	ENSMUST00000146711	Atp6v1g2-002
OCR_101512	chr7	82514255	82514695	1.28732	2.68088	39.1626	5.3e-08	3.2e-06	Treg_IK_UnstimVSTreg_WT_Unstim	ENSMUST00000165175+Sv2b-202	ENSMUST00000165175	Sv2b-202
OCR_47823	chr16	92654079	92654472	1.28728	2.39711	30.8291	6.72e-07	2.36e-05	Treg_IK_UnstimVSTreg_WT_Unstim	ENSMUST00000148919+Gm16801-201	ENSMUST00000148919	Gm16801-201
OCR_75326	chr3	138531344	138531749	1.28593	2.14506	20.5643	2.8e-05	0.000404901	Treg_IK_UnstimVSTreg_WT_Unstim	ENSMUST00000121826+Tspan5-004	ENSMUST00000121826	Tspan5-004
OCR_36875	chr14	78689845	78690293	1.28201	1.67383	14.891	0.000364262	0.0028431	Treg_IK_UnstimVSTreg_WT_Unstim	ENSMUST00000110858+Tnfsf11-202	ENSMUST00000110858	Tnfsf11-202
OCR_71282	chr3	51576075	51577010	1.28137	3.24079	51.4441	1.25e-09	1.71e-07	Treg_IK_UnstimVSTreg_WT_Unstim	ENSMUST00000118075+Maml3-002	ENSMUST00000118075	Maml3-002
OCR_29093	chr13	41548643	41549322	1.28085	3.57105	60.4936	1.15e-10	2.32e-08	Treg_IK_UnstimVSTreg_WT_Unstim	ENSMUST00000169127+Nedd9-203	ENSMUST00000169127	Nedd9-203
OCR_109632	chr8	108097329	108097767	1.28083	1.77754	20.2534	3.16e-05	0.000442196	Treg_IK_UnstimVSTreg_WT_Unstim	ENSMUST00000166485+Gm17380-201	ENSMUST00000166485	Gm17380-201
OCR_32457	chr13	107670817	107671225	1.28039	1.91036	23.1697	1.04e-05	0.000190174	Treg_IK_UnstimVSTreg_WT_Unstim	ENSMUST00000057427+Ipo11-204	ENSMUST00000057427	Ipo11-204
OCR_81212	chr4	114761112	114761985	1.27977	4.06382	70.1998	1.09e-11	3.34e-09	Treg_IK_UnstimVSTreg_WT_Unstim	ENSMUST00000171877+Pdzk1ip1-201	ENSMUST00000171877	Pdzk1ip1-201
OCR_64019	chr2	79406449	79406916	1.27872	2.08369	24.9571	5.34e-06	0.000115097	Treg_IK_UnstimVSTreg_WT_Unstim	ENSMUST00000111785+Ssfa2-001	ENSMUST00000111785	Ssfa2-001
OCR_67510	chr2	151788233	151788578	1.27747	2.72261	34.6572	1.96e-07	8.98e-06	Treg_IK_UnstimVSTreg_WT_Unstim	ENSMUST00000157866+Mir1953-201	ENSMUST00000157866	Mir1953-201
OCR_99338	chr7	26492319	26493516	1.27618	5.21371	126.336	2.3e-16	6.2e-13	Treg_IK_UnstimVSTreg_WT_Unstim	ENSMUST00000134201+Ccdc97-003	ENSMUST00000134201	Ccdc97-003
OCR_9648	chr10	17779483	17779929	1.27521	3.61866	68.3117	1.69e-11	4.93e-09	Treg_IK_UnstimVSTreg_WT_Unstim	ENSMUST00000150029+Reps1-002	ENSMUST00000150029	Reps1-002
OCR_93266	chr6	55152856	55153927	1.27452	4.14781	82.5019	6.96e-13	3.75e-10	Treg_IK_UnstimVSTreg_WT_Unstim	ENSMUST00000053094+Fam188b-201	ENSMUST00000053094	Fam188b-201
OCR_108812	chr8	89362627	89363382	1.27344	3.14463	53.5977	6.96e-10	1.05e-07	Treg_IK_UnstimVSTreg_WT_Unstim	ENSMUST00000080846+N4bp1-202	ENSMUST00000080846	N4bp1-202
OCR_82272	chr4	132304639	132305164	1.272	2.36449	30.7025	7.02e-07	2.44e-05	Treg_IK_UnstimVSTreg_WT_Unstim	ENSMUST00000030709+Smpdl3b-001	ENSMUST00000030709	Smpdl3b-001
OCR_112835	chr9	43839953	43840386	1.27178	2.31885	23.2596	1e-05	0.000185808	Treg_IK_UnstimVSTreg_WT_Unstim	ENSMUST00000114840+Thy1-001	ENSMUST00000114840	Thy1-001
OCR_22447	chr12	17394388	17395187	1.27011	3.15645	44.4036	1.09e-08	9.26e-07	Treg_IK_UnstimVSTreg_WT_Unstim	ENSMUST00000175296+Mir3066-201	ENSMUST00000175296	Mir3066-201
OCR_2241	chr1	62782492	62783733	1.26903	3.26926	48.2581	3.04e-09	3.4e-07	Treg_IK_UnstimVSTreg_WT_Unstim	ENSMUST00000027112+Nrp2-005	ENSMUST00000027112	Nrp2-005
OCR_108558	chr8	84385239	84385629	1.26869	1.86264	23.2557	1e-05	0.000185808	Treg_IK_UnstimVSTreg_WT_Unstim	ENSMUST00000109851+Inpp4b-007	ENSMUST00000109851	Inpp4b-007
OCR_95740	chr6	108635979	108636240	1.26807	2.11962	22.8738	1.43e-05	0.000243223	Treg_IK_UnstimVSTreg_WT_Unstim	ENSMUST00000137478+0610040F04Rik-001	ENSMUST00000137478	0610040F04Rik-001
OCR_36389	chr14	69875102	69875856	1.26714	3.10569	38.8378	4.99e-08	3.06e-06	Treg_IK_UnstimVSTreg_WT_Unstim	ENSMUST00000037064+Slc25a37-201	ENSMUST00000037064	Slc25a37-201
OCR_38507	chr14	122401337	122401789	1.26547	2.99202	43.8776	1.08e-08	9.2e-07	Treg_IK_UnstimVSTreg_WT_Unstim	ENSMUST00000045976+Timm8a2-001	ENSMUST00000045976	Timm8a2-001
OCR_96573	chr6	122243793	122244266	1.26496	4.30502	78.6108	1.61e-12	7.46e-10	Treg_IK_UnstimVSTreg_WT_Unstim	ENSMUST00000032207+Klrg1-001	ENSMUST00000032207	Klrg1-001
OCR_69848	chr3	14978574	14979662	1.26327	3.29557	47.2946	4e-09	4.28e-07	Treg_IK_UnstimVSTreg_WT_Unstim	ENSMUST00000029078+Car2-201	ENSMUST00000029078	Car2-201
OCR_93194	chr6	54276395	54277489	1.26226	2.86433	32.8416	3.6e-07	1.42e-05	Treg_IK_UnstimVSTreg_WT_Unstim	ENSMUST00000059138+Prr15-201	ENSMUST00000059138	Prr15-201
OCR_87726	chr5	101050682	101051998	1.26184	4.64433	92.573	9.96e-14	8.69e-11	Treg_IK_UnstimVSTreg_WT_Unstim	ENSMUST00000135801+Coq2-005	ENSMUST00000135801	Coq2-005
OCR_22504	chr12	17783777	17784430	1.26132	2.18875	23.7172	8.44e-06	0.000163319	Treg_IK_UnstimVSTreg_WT_Unstim	ENSMUST00000071858+Hpcal1-201	ENSMUST00000071858	Hpcal1-201
OCR_55715	chr18	60370934	60371860	1.26131	3.58639	48.57	2.78e-09	3.16e-07	Treg_IK_UnstimVSTreg_WT_Unstim	ENSMUST00000031549+Gm4951-001	ENSMUST00000031549	Gm4951-001
OCR_68345	chr2	164880635	164882178	1.26126	3.96744	71.1392	8.72e-12	2.78e-09	Treg_IK_UnstimVSTreg_WT_Unstim	ENSMUST00000154443+Cd40-004	ENSMUST00000154443	Cd40-004
OCR_86120	chr5	53804811	53805497	1.26118	3.95964	70.4602	1.02e-11	3.19e-09	Treg_IK_UnstimVSTreg_WT_Unstim	ENSMUST00000158021+5S_rRNA.63-201	ENSMUST00000158021	5S_rRNA.63-201
OCR_94281	chr6	83223669	83224189	1.26063	2.42068	30.2865	8.09e-07	2.71e-05	Treg_IK_UnstimVSTreg_WT_Unstim	ENSMUST00000141863+Slc4a5-005	ENSMUST00000141863	Slc4a5-005
OCR_17922	chr11	52137891	52138848	1.26015	2.89305	40.4845	2.99e-08	2.02e-06	Treg_IK_UnstimVSTreg_WT_Unstim	ENSMUST00000102758+Vdac1-001	ENSMUST00000102758	Vdac1-001
OCR_87448	chr5	92802191	92802569	1.25952	2.38407	28.1055	1.73e-06	4.85e-05	Treg_IK_UnstimVSTreg_WT_Unstim	ENSMUST00000120781+Art3-009	ENSMUST00000120781	Art3-009
OCR_73624	chr3	102542106	102542953	1.25938	4.0793	77.0996	2.25e-12	9.69e-10	Treg_IK_UnstimVSTreg_WT_Unstim	ENSMUST00000146624+2410057H14Rik-001	ENSMUST00000146624	2410057H14Rik-001
OCR_53475	chr18	5740235	5740856	1.25771	2.65172	31.6297	5.12e-07	1.88e-05	Treg_IK_UnstimVSTreg_WT_Unstim	ENSMUST00000177030+Zeb1-003	ENSMUST00000177030	Zeb1-003
OCR_23138	chr12	33905157	33906020	1.25677	3.63897	53.7385	6.71e-10	1.02e-07	Treg_IK_UnstimVSTreg_WT_Unstim	ENSMUST00000155877+Gm11052-001	ENSMUST00000155877	Gm11052-001
OCR_43040	chr15	98000810	98001209	1.25573	2.22828	29.6044	1.02e-06	3.26e-05	Treg_IK_UnstimVSTreg_WT_Unstim	ENSMUST00000031914+AI836003-201	ENSMUST00000031914	AI836003-201
OCR_74938	chr3	133212818	133213145	1.25514	2.00499	25.3831	4.57e-06	0.000102107	Treg_IK_UnstimVSTreg_WT_Unstim	ENSMUST00000098603+Tet2-202	ENSMUST00000098603	Tet2-202
OCR_92816	chr6	48529150	48529695	1.2547	2.44608	29.7284	9.8e-07	3.14e-05	Treg_IK_UnstimVSTreg_WT_Unstim	ENSMUST00000009425+Rarres2-201	ENSMUST00000009425	Rarres2-201
OCR_86867	chr5	74744201	74745124	1.25461	4.26688	73.1818	8.96e-12	2.84e-09	Treg_IK_UnstimVSTreg_WT_Unstim	ENSMUST00000121681+Gm15982-001	ENSMUST00000121681	Gm15982-001
OCR_1639	chr1	52189814	52190664	1.25391	4.05636	79.3268	1.38e-12	6.78e-10	Treg_IK_UnstimVSTreg_WT_Unstim	ENSMUST00000070968+Stat1-201	ENSMUST00000070968	Stat1-201
OCR_56932	chr18	80879431	80880045	1.25388	3.84905	68.2135	1.73e-11	4.97e-09	Treg_IK_UnstimVSTreg_WT_Unstim	ENSMUST00000167977+Nfatc1-203	ENSMUST00000167977	Nfatc1-203
OCR_64888	chr2	103410060	103410260	1.25234	2.50432	31.6171	5.15e-07	1.89e-05	Treg_IK_UnstimVSTreg_WT_Unstim	ENSMUST00000076212+Abtb2-001	ENSMUST00000076212	Abtb2-001
OCR_46448	chr16	57281271	57281922	1.25111	2.64101	27.9736	2.07e-06	5.58e-05	Treg_IK_UnstimVSTreg_WT_Unstim	ENSMUST00000023434+Tmem30c-201	ENSMUST00000023434	Tmem30c-201
OCR_53049	chr17	87763551	87763993	1.24894	2.00149	21.0071	2.36e-05	0.000355482	Treg_IK_UnstimVSTreg_WT_Unstim	ENSMUST00000159031+0610012D04Rik-001	ENSMUST00000159031	0610012D04Rik-001
OCR_90617	chr5	147098501	147099036	1.24474	2.00709	22.1451	1.53e-05	0.000254625	Treg_IK_UnstimVSTreg_WT_Unstim	ENSMUST00000159615+Cdk8-004	ENSMUST00000159615	Cdk8-004
OCR_36041	chr14	62966060	62966788	1.24384	3.37619	53.6241	6.91e-10	1.04e-07	Treg_IK_UnstimVSTreg_WT_Unstim	ENSMUST00000156608+Rnaseh2b-002	ENSMUST00000156608	Rnaseh2b-002
OCR_79674	chr4	82911894	82912635	1.24327	3.21808	40.8583	3.41e-08	2.26e-06	Treg_IK_UnstimVSTreg_WT_Unstim	ENSMUST00000146519+Ttc39b-005	ENSMUST00000146519	Ttc39b-005
OCR_44729	chr16	23844661	23845433	1.24292	3.03526	47.3445	3.94e-09	4.23e-07	Treg_IK_UnstimVSTreg_WT_Unstim	ENSMUST00000004480+Sst-201	ENSMUST00000004480	Sst-201
OCR_62772	chr2	58432415	58433044	1.24229	2.52109	32.8968	3.35e-07	1.36e-05	Treg_IK_UnstimVSTreg_WT_Unstim	ENSMUST00000071543+Upp2-003	ENSMUST00000071543	Upp2-003
OCR_96574	chr6	122244399	122244706	1.24143	3.4459	49.1985	2.35e-09	2.76e-07	Treg_IK_UnstimVSTreg_WT_Unstim	ENSMUST00000032207+Klrg1-001	ENSMUST00000032207	Klrg1-001
OCR_34101	chr14	21789570	21790000	1.24077	1.77107	17.5858	9.98e-05	0.00105585	Treg_IK_UnstimVSTreg_WT_Unstim	ENSMUST00000022369+Vcl-201	ENSMUST00000022369	Vcl-201
OCR_61576	chr2	32283537	32284132	1.24027	3.76879	58.957	1.7e-10	3.22e-08	Treg_IK_UnstimVSTreg_WT_Unstim	ENSMUST00000113308+Slc25a25-005	ENSMUST00000113308	Slc25a25-005
OCR_92476	chr6	39233684	39234431	1.24004	2.71669	31.2427	5.84e-07	2.1e-05	Treg_IK_UnstimVSTreg_WT_Unstim	ENSMUST00000158797+U6.900-201	ENSMUST00000158797	U6.900-201
OCR_23816	chr12	53103902	53104095	1.2399	1.53116	18.1109	7.4e-05	0.000840405	Treg_IK_UnstimVSTreg_WT_Unstim	ENSMUST00000085404+6530401N04Rik-002	ENSMUST00000085404	6530401N04Rik-002
OCR_116930	chrX	12434650	12435476	1.23984	3.5353	60.05	1.29e-10	2.55e-08	Treg_IK_UnstimVSTreg_WT_Unstim	ENSMUST00000104666+AL662925.1-201	ENSMUST00000104666	AL662925.1-201
OCR_45541	chr16	38407695	38408003	1.23772	2.70835	36.303	1.1e-07	5.64e-06	Treg_IK_UnstimVSTreg_WT_Unstim	ENSMUST00000002926+Pla1a-201	ENSMUST00000002926	Pla1a-201
OCR_14262	chr10	99018138	99019069	1.23771	3.39221	60.1328	1.26e-10	2.5e-08	Treg_IK_UnstimVSTreg_WT_Unstim	ENSMUST00000167243+Gad1-ps-201	ENSMUST00000167243	Gad1-ps-201
OCR_70815	chr3	37637047	37637848	1.23703	4.36604	84.8473	4.24e-13	2.67e-10	Treg_IK_UnstimVSTreg_WT_Unstim	ENSMUST00000099128+Gm5148-003	ENSMUST00000099128	Gm5148-003
OCR_88554	chr5	113547693	113548062	1.23621	2.49467	29.5163	1.05e-06	3.33e-05	Treg_IK_UnstimVSTreg_WT_Unstim	ENSMUST00000119627+Crybb3-001	ENSMUST00000119627	Crybb3-001
OCR_100679	chr7	63102088	63102475	1.23571	2.54663	27.6984	2.21e-06	5.84e-05	Treg_IK_UnstimVSTreg_WT_Unstim	ENSMUST00000163845+Cyfip1-006	ENSMUST00000163845	Cyfip1-006
OCR_27404	chr13	5788113	5789002	1.23457	3.21471	39.542	3.99e-08	2.57e-06	Treg_IK_UnstimVSTreg_WT_Unstim	ENSMUST00000000080+Klf6-201	ENSMUST00000000080	Klf6-201
OCR_92340	chr6	37350761	37351348	1.23343	3.56575	58.6098	1.86e-10	3.45e-08	Treg_IK_UnstimVSTreg_WT_Unstim	ENSMUST00000041093+Creb3l2-001	ENSMUST00000041093	Creb3l2-001
OCR_54564	chr18	35904835	35905335	1.23252	2.92196	32.4756	3.86e-07	1.5e-05	Treg_IK_UnstimVSTreg_WT_Unstim	ENSMUST00000115728+Tmem173-202	ENSMUST00000115728	Tmem173-202
OCR_28362	chr13	24322246	24323441	1.23132	3.12794	42.8209	1.47e-08	1.17e-06	Treg_IK_UnstimVSTreg_WT_Unstim	ENSMUST00000136517+Lrrc16a-008	ENSMUST00000136517	Lrrc16a-008
OCR_87046	chr5	77789091	77789396	1.2313	2.24683	23.3305	9.75e-06	0.000182263	Treg_IK_UnstimVSTreg_WT_Unstim	ENSMUST00000150191+Polr2b-004	ENSMUST00000150191	Polr2b-004
OCR_75327	chr3	138537485	138537886	1.23064	2.622	34.3605	2.07e-07	9.34e-06	Treg_IK_UnstimVSTreg_WT_Unstim	ENSMUST00000121826+Tspan5-004	ENSMUST00000121826	Tspan5-004
OCR_36450	chr14	70394296	70395213	1.23059	3.22369	45.3649	6.97e-09	6.5e-07	Treg_IK_UnstimVSTreg_WT_Unstim	ENSMUST00000035908+Egr3-201	ENSMUST00000035908	Egr3-201
OCR_57276	chr18	84879011	84879761	1.22703	2.86856	36.6123	1e-07	5.22e-06	Treg_IK_UnstimVSTreg_WT_Unstim	ENSMUST00000161429+Fam69c-002	ENSMUST00000161429	Fam69c-002
OCR_50445	chr17	37322430	37322794	1.22634	1.7162	15.5994	0.000207889	0.00184541	Treg_IK_UnstimVSTreg_WT_Unstim	ENSMUST00000174025+Gm20497-001	ENSMUST00000174025	Gm20497-001
OCR_27075	chr12	117823191	117823956	1.22602	3.07617	43.0551	1.38e-08	1.11e-06	Treg_IK_UnstimVSTreg_WT_Unstim	ENSMUST00000084823+Ptprn2-202	ENSMUST00000084823	Ptprn2-202
OCR_38726	chr15	5462627	5462832	1.22598	1.68496	17.9214	7.99e-05	0.000889685	Treg_IK_UnstimVSTreg_WT_Unstim	ENSMUST00000047379+Ptger4-001	ENSMUST00000047379	Ptger4-001
OCR_39872	chr15	36390165	36390703	1.22594	2.92878	40.5058	2.97e-08	2.02e-06	Treg_IK_UnstimVSTreg_WT_Unstim	ENSMUST00000057486+Ankrd46-201	ENSMUST00000057486	Ankrd46-201
OCR_82833	chr4	139134908	139135374	1.22586	4.17273	75.4104	3.29e-12	1.27e-09	Treg_IK_UnstimVSTreg_WT_Unstim	ENSMUST00000040023+Iffo2-201	ENSMUST00000040023	Iffo2-201
OCR_41121	chr15	66730438	66730877	1.22523	2.1045	19.4383	4.39e-05	0.000565424	Treg_IK_UnstimVSTreg_WT_Unstim	ENSMUST00000118823+Wisp1-003	ENSMUST00000118823	Wisp1-003
OCR_45669	chr16	43591145	43591540	1.22418	1.94296	21.4066	2.02e-05	0.000314866	Treg_IK_UnstimVSTreg_WT_Unstim	ENSMUST00000033479+Zbtb20-202	ENSMUST00000033479	Zbtb20-202
OCR_50162	chr17	34355138	34356391	1.2234	4.39915	76.182	2.76e-12	1.14e-09	Treg_IK_UnstimVSTreg_WT_Unstim	ENSMUST00000121995+Gm15821-001	ENSMUST00000121995	Gm15821-001
OCR_107149	chr8	47737070	47737797	1.22311	3.57541	57.5687	2.44e-10	4.36e-08	Treg_IK_UnstimVSTreg_WT_Unstim	ENSMUST00000093517+Casp3-201	ENSMUST00000093517	Casp3-201
OCR_114063	chr9	69305797	69306451	1.22218	3.70471	66.6293	2.53e-11	6.71e-09	Treg_IK_UnstimVSTreg_WT_Unstim	ENSMUST00000175301+Mir3109-201	ENSMUST00000175301	Mir3109-201
OCR_74202	chr3	115831760	115833001	1.21814	2.86769	37.4882	7.58e-08	4.22e-06	Treg_IK_UnstimVSTreg_WT_Unstim	ENSMUST00000106493+Vcam1-202	ENSMUST00000106493	Vcam1-202
OCR_56148	chr18	66588818	66589510	1.21808	3.43872	51.9401	1.09e-09	1.55e-07	Treg_IK_UnstimVSTreg_WT_Unstim	ENSMUST00000025399+Pmaip1-201	ENSMUST00000025399	Pmaip1-201
OCR_24597	chr12	74691791	74692034	1.21797	2.09104	26.6977	2.84e-06	7.11e-05	Treg_IK_UnstimVSTreg_WT_Unstim	ENSMUST00000119092+Prkch-002	ENSMUST00000119092	Prkch-002
OCR_15872	chr10	128216513	128216876	1.21639	1.98772	23.0666	1.08e-05	0.000195676	Treg_IK_UnstimVSTreg_WT_Unstim	ENSMUST00000059546+Rpsa-ps2-201	ENSMUST00000059546	Rpsa-ps2-201
OCR_99062	chr7	19911032	19911584	1.21558	4.07352	72.0545	7.05e-12	2.31e-09	Treg_IK_UnstimVSTreg_WT_Unstim	ENSMUST00000003640+Fosb-201	ENSMUST00000003640	Fosb-201
OCR_24608	chr12	74718413	74719056	1.21536	3.24913	45.9871	5.82e-09	5.77e-07	Treg_IK_UnstimVSTreg_WT_Unstim	ENSMUST00000119092+Prkch-002	ENSMUST00000119092	Prkch-002
OCR_86123	chr5	53820990	53821821	1.21498	4.00616	65.4658	3.35e-11	8.51e-09	Treg_IK_UnstimVSTreg_WT_Unstim	ENSMUST00000158021+5S_rRNA.63-201	ENSMUST00000158021	5S_rRNA.63-201
OCR_66920	chr2	143729170	143729967	1.21394	2.76069	35.4693	1.44e-07	7e-06	Treg_IK_UnstimVSTreg_WT_Unstim	ENSMUST00000103172+Dstn-001	ENSMUST00000103172	Dstn-001
OCR_99340	chr7	26496762	26497273	1.21293	3.19336	40.9076	2.71e-08	1.88e-06	Treg_IK_UnstimVSTreg_WT_Unstim	ENSMUST00000134201+Ccdc97-003	ENSMUST00000134201	Ccdc97-003
OCR_100681	chr7	63107775	63108769	1.21163	4.23729	74.8487	3.73e-12	1.4e-09	Treg_IK_UnstimVSTreg_WT_Unstim	ENSMUST00000163845+Cyfip1-006	ENSMUST00000163845	Cyfip1-006
OCR_61490	chr2	31467963	31468942	1.20954	3.80339	64.0637	4.72e-11	1.12e-08	Treg_IK_UnstimVSTreg_WT_Unstim	ENSMUST00000150473+Fubp3-008	ENSMUST00000150473	Fubp3-008
OCR_64203	chr2	84489745	84490388	1.20917	2.37639	25.5942	4.28e-06	9.71e-05	Treg_IK_UnstimVSTreg_WT_Unstim	ENSMUST00000036811+Ctnnd1-003	ENSMUST00000036811	Ctnnd1-003
OCR_27752	chr13	11957405	11957834	1.20895	2.52036	28.7392	1.38e-06	4.12e-05	Treg_IK_UnstimVSTreg_WT_Unstim	ENSMUST00000021750+Ryr2-201	ENSMUST00000021750	Ryr2-201
OCR_29269	chr13	44564995	44565564	1.20868	1.98113	18.0426	7.61e-05	0.00085715	Treg_IK_UnstimVSTreg_WT_Unstim	ENSMUST00000174394+Jarid2-009	ENSMUST00000174394	Jarid2-009
OCR_88741	chr5	115636679	115637046	1.20806	2.15042	23.6993	8.5e-06	0.000164039	Treg_IK_UnstimVSTreg_WT_Unstim	ENSMUST00000031519+Cabp1-001	ENSMUST00000031519	Cabp1-001
OCR_87912	chr5	103867987	103868774	1.20774	3.78298	65.9258	3e-11	7.71e-09	Treg_IK_UnstimVSTreg_WT_Unstim	ENSMUST00000094553+Ptpn13-202	ENSMUST00000094553	Ptpn13-202
OCR_40489	chr15	53323067	53324146	1.20726	3.37526	45.2938	7.11e-09	6.63e-07	Treg_IK_UnstimVSTreg_WT_Unstim	ENSMUST00000104379+SNORA17.212-201	ENSMUST00000104379	SNORA17.212-201
OCR_60102	chr2	6519486	6520249	1.20656	3.85557	60.4572	1.16e-10	2.32e-08	Treg_IK_UnstimVSTreg_WT_Unstim	ENSMUST00000168146+Celf2-203	ENSMUST00000168146	Celf2-203
OCR_34852	chr14	34153463	34154085	1.20654	2.0633	19.6911	3.94e-05	0.000520088	Treg_IK_UnstimVSTreg_WT_Unstim	ENSMUST00000140711+Arhgap22-005	ENSMUST00000140711	Arhgap22-005
OCR_91233	chr6	8533834	8534386	1.20611	2.20926	24.1588	7.17e-06	0.000144074	Treg_IK_UnstimVSTreg_WT_Unstim	ENSMUST00000162206+Glcci1-010	ENSMUST00000162206	Glcci1-010
OCR_117860	chrX	103141624	103142359	1.20589	3.01882	36.4926	1.04e-07	5.37e-06	Treg_IK_UnstimVSTreg_WT_Unstim	ENSMUST00000113573+Atrx-001	ENSMUST00000113573	Atrx-001
OCR_59970	chr2	4957421	4958141	1.20561	2.2496	23.6883	8.53e-06	0.000164442	Treg_IK_UnstimVSTreg_WT_Unstim	ENSMUST00000145501+Optn-004	ENSMUST00000145501	Optn-004
OCR_50971	chr17	50281529	50282726	1.20423	3.70305	55.0268	4.75e-10	7.52e-08	Treg_IK_UnstimVSTreg_WT_Unstim	ENSMUST00000156094+Rftn1-003	ENSMUST00000156094	Rftn1-003
OCR_110876	chr8	126321657	126322519	1.20411	3.23121	47.9488	3.32e-09	3.66e-07	Treg_IK_UnstimVSTreg_WT_Unstim	ENSMUST00000118535+Rab4a-001	ENSMUST00000118535	Rab4a-001
OCR_9940	chr10	21083138	21083349	1.2037	1.71039	19.0278	5.13e-05	0.000636713	Treg_IK_UnstimVSTreg_WT_Unstim	ENSMUST00000042699+Aldh8a1-001	ENSMUST00000042699	Aldh8a1-001
OCR_84260	chr5	9059717	9059972	1.20337	2.01824	21.7804	1.75e-05	0.000283508	Treg_IK_UnstimVSTreg_WT_Unstim	ENSMUST00000115365+4930420K17Rik-201	ENSMUST00000115365	4930420K17Rik-201
OCR_12684	chr10	77555390	77555950	1.20268	2.45114	22.2372	1.75e-05	0.000283508	Treg_IK_UnstimVSTreg_WT_Unstim	ENSMUST00000105393+Icosl-202	ENSMUST00000105393	Icosl-202
OCR_1667	chr1	52511268	52512087	1.20206	3.76448	60.4785	1.16e-10	2.32e-08	Treg_IK_UnstimVSTreg_WT_Unstim	ENSMUST00000083258+U6.254-201	ENSMUST00000083258	U6.254-201
OCR_86152	chr5	54337466	54339382	1.20158	4.18478	72.1249	6.94e-12	2.29e-09	Treg_IK_UnstimVSTreg_WT_Unstim	ENSMUST00000117661+Stim2-001	ENSMUST00000117661	Stim2-001
OCR_63281	chr2	68172936	68173520	1.20135	2.43154	27.557	2.09e-06	5.61e-05	Treg_IK_UnstimVSTreg_WT_Unstim	ENSMUST00000126663+Stk39-008	ENSMUST00000126663	Stk39-008
OCR_62102	chr2	44811785	44812210	1.20104	2.73808	31.0973	7.91e-07	2.66e-05	Treg_IK_UnstimVSTreg_WT_Unstim	ENSMUST00000148279+Gtdc1-003	ENSMUST00000148279	Gtdc1-003
OCR_78342	chr4	45598191	45598837	1.20102	3.30215	42.7395	1.51e-08	1.2e-06	Treg_IK_UnstimVSTreg_WT_Unstim	ENSMUST00000119140+Gm12411-001	ENSMUST00000119140	Gm12411-001
OCR_79163	chr4	62224128	62224394	1.20072	1.73998	16.5508	0.000139913	0.00136356	Treg_IK_UnstimVSTreg_WT_Unstim	ENSMUST00000065870+Rgs3-001	ENSMUST00000065870	Rgs3-001
OCR_9602	chr10	17269786	17270576	1.20052	3.50482	51.1989	1.34e-09	1.79e-07	Treg_IK_UnstimVSTreg_WT_Unstim	ENSMUST00000038107+Cited2-201	ENSMUST00000038107	Cited2-201
OCR_106321	chr8	26259427	26260049	1.20035	2.21158	22.6942	1.34e-05	0.000231289	Treg_IK_UnstimVSTreg_WT_Unstim	ENSMUST00000064883+Plekha2-001	ENSMUST00000064883	Plekha2-001
OCR_60111	chr2	6567525	6568484	1.19811	2.97915	34.181	3.05e-07	1.27e-05	Treg_IK_UnstimVSTreg_WT_Unstim	ENSMUST00000148321+Celf2-007	ENSMUST00000148321	Celf2-007
OCR_64352	chr2	90330513	90331297	1.19803	2.7381	35.5147	1.42e-07	6.94e-06	Treg_IK_UnstimVSTreg_WT_Unstim	ENSMUST00000126953+4933423P22Rik-001	ENSMUST00000126953	4933423P22Rik-001
OCR_23478	chr12	40845917	40846547	1.19784	2.97224	31.1331	6.13e-07	2.19e-05	Treg_IK_UnstimVSTreg_WT_Unstim	ENSMUST00000164063+Scin-201	ENSMUST00000164063	Scin-201
OCR_62791	chr2	58894730	58895681	1.1975	5.07377	105.533	7.36e-15	9.7e-12	Treg_IK_UnstimVSTreg_WT_Unstim	ENSMUST00000120771+Gm13557-001	ENSMUST00000120771	Gm13557-001
OCR_58262	chr19	18674080	18674682	1.19451	3.30319	44.2795	1.5e-08	1.19e-06	Treg_IK_UnstimVSTreg_WT_Unstim	ENSMUST00000117398+Gm8250-001	ENSMUST00000117398	Gm8250-001
OCR_98580	chr7	4454365	4454595	1.19377	2.22981	24.1648	7.15e-06	0.000144042	Treg_IK_UnstimVSTreg_WT_Unstim	ENSMUST00000013886+Ppp1r12c-001	ENSMUST00000013886	Ppp1r12c-001
OCR_16480	chr11	11610031	11610681	1.19319	2.85026	31.0922	6.15e-07	2.19e-05	Treg_IK_UnstimVSTreg_WT_Unstim	ENSMUST00000168214+Ikzf1-207	ENSMUST00000168214	Ikzf1-207
OCR_45855	chr16	45644571	45644952	1.19301	1.97268	20.452	2.93e-05	0.000418001	Treg_IK_UnstimVSTreg_WT_Unstim	ENSMUST00000036732+BC016579-201	ENSMUST00000036732	BC016579-201
OCR_1305	chr1	40585700	40587086	1.19263	3.83295	53.9346	6.73e-10	1.02e-07	Treg_IK_UnstimVSTreg_WT_Unstim	ENSMUST00000160468+Il18rap-004	ENSMUST00000160468	Il18rap-004
OCR_25332	chr12	88033953	88034683	1.19248	2.4335	26.4998	3.05e-06	7.52e-05	Treg_IK_UnstimVSTreg_WT_Unstim	ENSMUST00000167272+Angel1-005	ENSMUST00000167272	Angel1-005
OCR_118503	chrX	162745292	162745724	1.19143	1.7482	17.9597	7.87e-05	0.000879831	Treg_IK_UnstimVSTreg_WT_Unstim	ENSMUST00000123408+Gpm6b-010	ENSMUST00000123408	Gpm6b-010
OCR_13143	chr10	82453409	82453762	1.19129	1.94844	23.7511	8.34e-06	0.0001618	Treg_IK_UnstimVSTreg_WT_Unstim	ENSMUST00000040110+Chst11-001	ENSMUST00000040110	Chst11-001
OCR_45197	chr16	32379329	32380129	1.19093	3.26371	39.424	4.14e-08	2.63e-06	Treg_IK_UnstimVSTreg_WT_Unstim	ENSMUST00000115149+Tm4sf19-201	ENSMUST00000115149	Tm4sf19-201
OCR_19324	chr11	79490784	79491308	1.19068	2.976	38.0673	6.43e-08	3.69e-06	Treg_IK_UnstimVSTreg_WT_Unstim	ENSMUST00000123067+4930542H20Rik-002	ENSMUST00000123067	4930542H20Rik-002
OCR_24567	chr12	74425741	74426038	1.18958	1.84938	16.9105	0.000120648	0.00121512	Treg_IK_UnstimVSTreg_WT_Unstim	ENSMUST00000134247+Slc38a6-007	ENSMUST00000134247	Slc38a6-007
OCR_100067	chr7	46704579	46705596	1.18951	4.69249	91.7317	1.03e-13	8.89e-11	Treg_IK_UnstimVSTreg_WT_Unstim	ENSMUST00000059110+Gm5590-201	ENSMUST00000059110	Gm5590-201
OCR_99873	chr7	36880194	36881057	1.18914	2.62887	30.3269	7.98e-07	2.68e-05	Treg_IK_UnstimVSTreg_WT_Unstim	ENSMUST00000085520+Gm10166-201	ENSMUST00000085520	Gm10166-201
OCR_83000	chr4	141322113	141322605	1.18911	1.9817	20.0546	3.42e-05	0.000468688	Treg_IK_UnstimVSTreg_WT_Unstim	ENSMUST00000138654+Dnajc16-003	ENSMUST00000138654	Dnajc16-003
OCR_48559	chr17	8614552	8615359	1.18818	2.36683	25.3931	4.56e-06	0.000101814	Treg_IK_UnstimVSTreg_WT_Unstim	ENSMUST00000074667+T-001	ENSMUST00000074667	T-001
OCR_99609	chr7	30968820	30969564	1.1877	4.38811	70.3928	1.04e-11	3.22e-09	Treg_IK_UnstimVSTreg_WT_Unstim	ENSMUST00000098594+Cox7a1-201	ENSMUST00000098594	Cox7a1-201
OCR_604	chr1	21246456	21246850	1.18729	1.82036	13.3378	0.000560088	0.00396762	Treg_IK_UnstimVSTreg_WT_Unstim	ENSMUST00000061136+Gm7094-201	ENSMUST00000061136	Gm7094-201
OCR_56999	chr18	81601342	81601929	1.18686	3.74752	54.7428	5.13e-10	7.98e-08	Treg_IK_UnstimVSTreg_WT_Unstim	ENSMUST00000158632+U6.875-201	ENSMUST00000158632	U6.875-201
OCR_75248	chr3	137636288	137636631	1.18681	3.34358	47.4182	3.86e-09	4.15e-07	Treg_IK_UnstimVSTreg_WT_Unstim	ENSMUST00000154716+Dapp1-005	ENSMUST00000154716	Dapp1-005
OCR_23483	chr12	40860936	40861618	1.18635	4.14168	66.0645	9.59e-11	2e-08	Treg_IK_UnstimVSTreg_WT_Unstim	ENSMUST00000002640+Scin-001	ENSMUST00000002640	Scin-001
OCR_29400	chr13	46610305	46610933	1.18579	1.92494	20.5144	2.86e-05	0.000410011	Treg_IK_UnstimVSTreg_WT_Unstim	ENSMUST00000157288+5S_rRNA.16-201	ENSMUST00000157288	5S_rRNA.16-201
OCR_1287	chr1	40469236	40469650	1.18571	2.39959	25.1402	5e-06	0.000108986	Treg_IK_UnstimVSTreg_WT_Unstim	ENSMUST00000174335+Il1rl1-003	ENSMUST00000174335	Il1rl1-003
OCR_41148	chr15	66982660	66983172	1.18549	2.45819	25.1759	4.93e-06	0.000107922	Treg_IK_UnstimVSTreg_WT_Unstim	ENSMUST00000092640+St3gal1-202	ENSMUST00000092640	St3gal1-202
OCR_4122	chr1	107644953	107645382	1.18469	1.96889	17.7064	8.72e-05	0.000950486	Treg_IK_UnstimVSTreg_WT_Unstim	ENSMUST00000086719+Gm10193-201	ENSMUST00000086719	Gm10193-201
OCR_56085	chr18	65486619	65487185	1.18421	3.90683	62.4693	7.01e-11	1.55e-08	Treg_IK_UnstimVSTreg_WT_Unstim	ENSMUST00000148078+Alpk2-002	ENSMUST00000148078	Alpk2-002
OCR_86186	chr5	54496517	54497285	1.18407	4.15325	67.1915	2.21e-11	6.02e-09	Treg_IK_UnstimVSTreg_WT_Unstim	ENSMUST00000152812+Stim2-002	ENSMUST00000152812	Stim2-002
OCR_86523	chr5	66258527	66258947	1.1822	3.21639	45.9515	5.88e-09	5.8e-07	Treg_IK_UnstimVSTreg_WT_Unstim	ENSMUST00000031106+Rhoh-201	ENSMUST00000031106	Rhoh-201
OCR_99171	chr7	25054884	25055734	1.18201	3.18439	34.8663	1.76e-07	8.2e-06	Treg_IK_UnstimVSTreg_WT_Unstim	ENSMUST00000108438+Zfp93-001	ENSMUST00000108438	Zfp93-001
OCR_48004	chr16	94965295	94966229	1.18183	3.02362	41.7882	2.01e-08	1.5e-06	Treg_IK_UnstimVSTreg_WT_Unstim	ENSMUST00000134383+Dyrk1a-005	ENSMUST00000134383	Dyrk1a-005
OCR_62792	chr2	58905610	58906325	1.18182	3.53558	45.8324	6.23e-09	5.99e-07	Treg_IK_UnstimVSTreg_WT_Unstim	ENSMUST00000118185+Gm13550-001	ENSMUST00000118185	Gm13550-001
OCR_28257	chr13	22112692	22113163	1.18101	2.1851	20.2302	3.54e-05	0.00048105	Treg_IK_UnstimVSTreg_WT_Unstim	ENSMUST00000147811+Gm11291-001	ENSMUST00000147811	Gm11291-001
OCR_113336	chr9	53212630	53212858	1.1809	1.56444	16.6887	0.000132175	0.00130551	Treg_IK_UnstimVSTreg_WT_Unstim	ENSMUST00000005262+4930550C14Rik-201	ENSMUST00000005262	4930550C14Rik-201
OCR_87447	chr5	92792141	92792696	1.1809	3.01296	38.04	6.37e-08	3.67e-06	Treg_IK_UnstimVSTreg_WT_Unstim	ENSMUST00000077820+Cxcl11-201	ENSMUST00000077820	Cxcl11-201
OCR_98224	chr6	145947060	145947612	1.18054	2.23351	21.8714	1.69e-05	0.000276072	Treg_IK_UnstimVSTreg_WT_Unstim	ENSMUST00000139089+Gm15705-001	ENSMUST00000139089	Gm15705-001
OCR_96578	chr6	122253453	122253768	1.17995	1.83123	20.5251	2.85e-05	0.000409121	Treg_IK_UnstimVSTreg_WT_Unstim	ENSMUST00000007602+M6pr-001	ENSMUST00000007602	M6pr-001
OCR_7370	chr1	174137407	174137689	1.17986	1.92118	19.2228	4.75e-05	0.000600971	Treg_IK_UnstimVSTreg_WT_Unstim	ENSMUST00000013842+Pea15a-001	ENSMUST00000013842	Pea15a-001
OCR_8625	chr1	193810705	193811059	1.17894	2.32593	24.6322	6.02e-06	0.000125706	Treg_IK_UnstimVSTreg_WT_Unstim	ENSMUST00000175680+Rd3-001	ENSMUST00000175680	Rd3-001
OCR_113311	chr9	52069553	52070240	1.17869	2.23591	23.0697	1.08e-05	0.000195611	Treg_IK_UnstimVSTreg_WT_Unstim	ENSMUST00000104608+SNORA17.322-201	ENSMUST00000104608	SNORA17.322-201
OCR_46366	chr16	55776363	55777071	1.17838	2.97311	41.537	2.17e-08	1.58e-06	Treg_IK_UnstimVSTreg_WT_Unstim	ENSMUST00000157825+U6.711-201	ENSMUST00000157825	U6.711-201
OCR_106783	chr8	36676844	36677745	1.17822	3.14544	38.339	5.8e-08	3.4e-06	Treg_IK_UnstimVSTreg_WT_Unstim	ENSMUST00000154989+Mfhas1-002	ENSMUST00000154989	Mfhas1-002
OCR_17781	chr11	50026526	50027228	1.17806	3.62991	57.5025	2.48e-10	4.41e-08	Treg_IK_UnstimVSTreg_WT_Unstim	ENSMUST00000147468+Mgat4b-002	ENSMUST00000147468	Mgat4b-002
OCR_55572	chr18	56896917	56897505	1.17803	5.21452	110.672	2.91e-15	4.55e-12	Treg_IK_UnstimVSTreg_WT_Unstim	ENSMUST00000128651+Lmnb1-002	ENSMUST00000128651	Lmnb1-002
OCR_163	chr1	9795468	9796335	1.1772	3.00606	38.9313	4.82e-08	2.98e-06	Treg_IK_UnstimVSTreg_WT_Unstim	ENSMUST00000063059+Gm6195-201	ENSMUST00000063059	Gm6195-201
OCR_19282	chr11	78948293	78948507	1.17665	1.9208	19.9413	3.57e-05	0.00048411	Treg_IK_UnstimVSTreg_WT_Unstim	ENSMUST00000100745+Ksr1-202	ENSMUST00000100745	Ksr1-202
OCR_99337	chr7	26490770	26491087	1.17618	2.14622	22.9717	1.12e-05	0.000200998	Treg_IK_UnstimVSTreg_WT_Unstim	ENSMUST00000134201+Ccdc97-003	ENSMUST00000134201	Ccdc97-003
OCR_117340	chrX	53635136	53635683	1.17495	1.74168	16.7243	0.000130246	0.00128968	Treg_IK_UnstimVSTreg_WT_Unstim	ENSMUST00000129981+Ncrna00086-002	ENSMUST00000129981	Ncrna00086-002
OCR_92344	chr6	37381263	37381689	1.17421	2.28963	22.1945	1.5e-05	0.000251491	Treg_IK_UnstimVSTreg_WT_Unstim	ENSMUST00000041093+Creb3l2-001	ENSMUST00000041093	Creb3l2-001
OCR_58401	chr19	24248161	24249143	1.17237	4.50928	81.5757	8.48e-13	4.34e-10	Treg_IK_UnstimVSTreg_WT_Unstim	ENSMUST00000170948+Tjp2-202	ENSMUST00000170948	Tjp2-202
OCR_22190	chr12	12345600	12345998	1.17232	1.8108	18.4983	6.33e-05	0.00074929	Treg_IK_UnstimVSTreg_WT_Unstim	ENSMUST00000069005+Fam49a-201	ENSMUST00000069005	Fam49a-201
OCR_1187	chr1	39291542	39292420	1.17188	3.78412	62.3836	7.16e-11	1.57e-08	Treg_IK_UnstimVSTreg_WT_Unstim	ENSMUST00000056815+Npas2-001	ENSMUST00000056815	Npas2-001
OCR_97250	chr6	134157414	134158475	1.17179	4.50018	82.8695	6.43e-13	3.57e-10	Treg_IK_UnstimVSTreg_WT_Unstim	ENSMUST00000169529+Etv6-004	ENSMUST00000169529	Etv6-004
OCR_75324	chr3	138526971	138527462	1.17172	2.55379	30.7574	6.89e-07	2.4e-05	Treg_IK_UnstimVSTreg_WT_Unstim	ENSMUST00000121826+Tspan5-004	ENSMUST00000121826	Tspan5-004
OCR_39109	chr15	12354812	12355428	1.17103	3.76032	50.0535	2.38e-09	2.79e-07	Treg_IK_UnstimVSTreg_WT_Unstim	ENSMUST00000165551+Golph3-202	ENSMUST00000165551	Golph3-202
OCR_18383	chr11	60955025	60955542	1.171	2.46682	31.3499	5.63e-07	2.04e-05	Treg_IK_UnstimVSTreg_WT_Unstim	ENSMUST00000137832+Tnfrsf13b-004	ENSMUST00000137832	Tnfrsf13b-004
OCR_109758	chr8	109793164	109793920	1.17059	2.26996	25.3013	4.71e-06	0.000104349	Treg_IK_UnstimVSTreg_WT_Unstim	ENSMUST00000151582+Nfat5-003	ENSMUST00000151582	Nfat5-003
OCR_11398	chr10	53245169	53245960	1.17003	4.72287	83.5351	6.13e-13	3.5e-10	Treg_IK_UnstimVSTreg_WT_Unstim	ENSMUST00000168554+Gm5423-201	ENSMUST00000168554	Gm5423-201
OCR_1439	chr1	43578746	43579399	1.17002	3.97159	62.4592	7.03e-11	1.55e-08	Treg_IK_UnstimVSTreg_WT_Unstim	ENSMUST00000124817+Nck2-004	ENSMUST00000124817	Nck2-004
OCR_39613	chr15	31286465	31287110	1.16848	2.51071	28.6472	1.43e-06	4.23e-05	Treg_IK_UnstimVSTreg_WT_Unstim	ENSMUST00000156679+Ankrd33b-004	ENSMUST00000156679	Ankrd33b-004
OCR_22464	chr12	17513841	17514592	1.16841	5.43482	113.87	1.7e-15	3.15e-12	Treg_IK_UnstimVSTreg_WT_Unstim	ENSMUST00000171737+Odc1-202	ENSMUST00000171737	Odc1-202
OCR_58261	chr19	18672829	18673963	1.16793	4.64945	91.9698	9.85e-14	8.69e-11	Treg_IK_UnstimVSTreg_WT_Unstim	ENSMUST00000117398+Gm8250-001	ENSMUST00000117398	Gm8250-001
OCR_118546	chrX	163548726	163549086	1.16725	1.83207	17.1014	0.000118141	0.00119657	Treg_IK_UnstimVSTreg_WT_Unstim	ENSMUST00000146929+Gm15232-001	ENSMUST00000146929	Gm15232-001
OCR_85502	chr5	37117648	37118041	1.16712	1.92086	20.7054	2.65e-05	0.000388701	Treg_IK_UnstimVSTreg_WT_Unstim	ENSMUST00000071949+Cno-201	ENSMUST00000071949	Cno-201
OCR_4893	chr1	130705011	130705629	1.16631	3.23466	40.2663	3.19e-08	2.14e-06	Treg_IK_UnstimVSTreg_WT_Unstim	ENSMUST00000170031+Gm17699-201	ENSMUST00000170031	Gm17699-201
OCR_38739	chr15	5644925	5645430	1.1656	3.38639	46.8784	4.5e-09	4.7e-07	Treg_IK_UnstimVSTreg_WT_Unstim	ENSMUST00000047379+Ptger4-001	ENSMUST00000047379	Ptger4-001
OCR_33095	chr13	117740230	117740533	1.16309	1.87251	21.448	1.99e-05	0.000311032	Treg_IK_UnstimVSTreg_WT_Unstim	ENSMUST00000168215+Parp8-202	ENSMUST00000168215	Parp8-202
OCR_7346	chr1	173912885	173913475	1.16302	2.65465	31.8089	4.82e-07	1.79e-05	Treg_IK_UnstimVSTreg_WT_Unstim	ENSMUST00000148363+Vangl2-005	ENSMUST00000148363	Vangl2-005
OCR_2391	chr1	66696578	66696958	1.16231	3.0697	44.4137	9.2e-09	8.17e-07	Treg_IK_UnstimVSTreg_WT_Unstim	ENSMUST00000152844+Unc80-002	ENSMUST00000152844	Unc80-002
OCR_19109	chr11	76386323	76386838	1.16211	3.08427	41.0525	2.51e-08	1.76e-06	Treg_IK_UnstimVSTreg_WT_Unstim	ENSMUST00000072740+Abr-001	ENSMUST00000072740	Abr-001
OCR_660	chr1	21819675	21820794	1.16189	4.55609	89.2114	1.72e-13	1.29e-10	Treg_IK_UnstimVSTreg_WT_Unstim	ENSMUST00000134505+Kcnq5-004	ENSMUST00000134505	Kcnq5-004
OCR_87722	chr5	101019522	101020103	1.16187	2.25719	25.0624	5.14e-06	0.000111559	Treg_IK_UnstimVSTreg_WT_Unstim	ENSMUST00000031264+Plac8-001	ENSMUST00000031264	Plac8-001
OCR_118048	chrX	130908514	130909489	1.16109	3.20522	47.2503	4.05e-09	4.33e-07	Treg_IK_UnstimVSTreg_WT_Unstim	ENSMUST00000125604+Cenpi-005	ENSMUST00000125604	Cenpi-005
OCR_64231	chr2	84684606	84684834	1.16077	1.88388	19.32	4.57e-05	0.000583041	Treg_IK_UnstimVSTreg_WT_Unstim	ENSMUST00000111625+Slc43a1-004	ENSMUST00000111625	Slc43a1-004
OCR_95425	chr6	100760111	100760391	1.1592	2.24956	24.0289	7.52e-06	0.000149251	Treg_IK_UnstimVSTreg_WT_Unstim	ENSMUST00000063854+Ppp4r2-201	ENSMUST00000063854	Ppp4r2-201
OCR_70126	chr3	21461691	21462148	1.15909	2.50019	27.4827	2.15e-06	5.73e-05	Treg_IK_UnstimVSTreg_WT_Unstim	ENSMUST00000117148+Gm7488-001	ENSMUST00000117148	Gm7488-001
OCR_23369	chr12	37194328	37195845	1.15836	3.62122	47.2523	4.17e-09	4.43e-07	Treg_IK_UnstimVSTreg_WT_Unstim	ENSMUST00000171007+D630036H23Rik-201	ENSMUST00000171007	D630036H23Rik-201
OCR_103712	chr7	125622689	125623380	1.15834	2.62543	30.6561	7.13e-07	2.47e-05	Treg_IK_UnstimVSTreg_WT_Unstim	ENSMUST00000098092+Itpripl2-202	ENSMUST00000098092	Itpripl2-202
OCR_22454	chr12	17434393	17434729	1.15828	2.27622	16.35	0.000204803	0.00182484	Treg_IK_UnstimVSTreg_WT_Unstim	ENSMUST00000175296+Mir3066-201	ENSMUST00000175296	Mir3066-201
OCR_9906	chr10	20920151	20920424	1.15822	1.93472	20.8609	2.5e-05	0.000371268	Treg_IK_UnstimVSTreg_WT_Unstim	ENSMUST00000104712+AC153556.1-201	ENSMUST00000104712	AC153556.1-201
OCR_47856	chr16	92864460	92865045	1.1576	3.45737	54.249	5.85e-10	9.01e-08	Treg_IK_UnstimVSTreg_WT_Unstim	ENSMUST00000023673+Runx1-201	ENSMUST00000023673	Runx1-201
OCR_52610	chr17	81472063	81472825	1.15742	2.30889	21.0463	2.37e-05	0.000355936	Treg_IK_UnstimVSTreg_WT_Unstim	ENSMUST00000025093+Thumpd2-201	ENSMUST00000025093	Thumpd2-201
OCR_71406	chr3	52669985	52670710	1.15703	2.79705	33.4103	2.83e-07	1.2e-05	Treg_IK_UnstimVSTreg_WT_Unstim	ENSMUST00000083992+U6.414-201	ENSMUST00000083992	U6.414-201
OCR_971	chr1	35926191	35927028	1.15624	2.84188	36.3452	1.09e-07	5.6e-06	Treg_IK_UnstimVSTreg_WT_Unstim	ENSMUST00000082667+U6.70-201	ENSMUST00000082667	U6.70-201
OCR_63665	chr2	73423207	73423890	1.1562	2.31549	20.8648	2.5e-05	0.000371268	Treg_IK_UnstimVSTreg_WT_Unstim	ENSMUST00000147235+Gm13705-001	ENSMUST00000147235	Gm13705-001
OCR_96504	chr6	121008110	121008385	1.15489	2.79219	32.8621	3.39e-07	1.37e-05	Treg_IK_UnstimVSTreg_WT_Unstim	ENSMUST00000163703+Gm4651-201	ENSMUST00000163703	Gm4651-201
OCR_38378	chr14	121501769	121502262	1.15379	2.76079	31.0217	6.29e-07	2.23e-05	Treg_IK_UnstimVSTreg_WT_Unstim	ENSMUST00000153607+Farp1-003	ENSMUST00000153607	Farp1-003
OCR_23133	chr12	33860832	33861366	1.15338	3.85487	51.93	1.4e-09	1.86e-07	Treg_IK_UnstimVSTreg_WT_Unstim	ENSMUST00000136644+Atxn7l1-003	ENSMUST00000136644	Atxn7l1-003
OCR_108415	chr8	81674274	81675130	1.15207	4.7486	86.5146	2.99e-13	2.04e-10	Treg_IK_UnstimVSTreg_WT_Unstim	ENSMUST00000155960+Zfp827-005	ENSMUST00000155960	Zfp827-005
OCR_112552	chr9	35302662	35303697	1.15195	4.12785	62.3648	7.32e-11	1.59e-08	Treg_IK_UnstimVSTreg_WT_Unstim	ENSMUST00000157980+5S_rRNA.59-201	ENSMUST00000157980	5S_rRNA.59-201
OCR_67892	chr2	157713073	157713823	1.15148	2.54462	27.2532	2.33e-06	6.09e-05	Treg_IK_UnstimVSTreg_WT_Unstim	ENSMUST00000121302+Gm14176-001	ENSMUST00000121302	Gm14176-001
OCR_45222	chr16	32672264	32672793	1.15062	2.81884	33.4906	2.75e-07	1.17e-05	Treg_IK_UnstimVSTreg_WT_Unstim	ENSMUST00000115122+Tnk2-015	ENSMUST00000115122	Tnk2-015
OCR_96960	chr6	128235698	128236505	1.15024	3.00604	32.797	3.47e-07	1.39e-05	Treg_IK_UnstimVSTreg_WT_Unstim	ENSMUST00000130454+Tead4-002	ENSMUST00000130454	Tead4-002
OCR_103344	chr7	119642741	119643622	1.14978	2.91764	29.3966	1.55e-06	4.47e-05	Treg_IK_UnstimVSTreg_WT_Unstim	ENSMUST00000123185+Parva-005	ENSMUST00000123185	Parva-005
OCR_100678	chr7	63101401	63101831	1.14927	2.46986	26.4688	3.09e-06	7.58e-05	Treg_IK_UnstimVSTreg_WT_Unstim	ENSMUST00000163845+Cyfip1-006	ENSMUST00000163845	Cyfip1-006
OCR_117573	chrX	83119178	83119804	1.1477	2.24421	20.0298	3.45e-05	0.00047217	Treg_IK_UnstimVSTreg_WT_Unstim	ENSMUST00000113976+5430427O19Rik-001	ENSMUST00000113976	5430427O19Rik-001
OCR_107152	chr8	47740915	47741816	1.14757	4.15821	69.0971	1.41e-11	4.19e-09	Treg_IK_UnstimVSTreg_WT_Unstim	ENSMUST00000093517+Casp3-201	ENSMUST00000093517	Casp3-201
OCR_104503	chr7	139977423	139978050	1.14713	3.17461	43.3857	1.25e-08	1.02e-06	Treg_IK_UnstimVSTreg_WT_Unstim	ENSMUST00000065371+Fam53b-006	ENSMUST00000065371	Fam53b-006
OCR_6315	chr1	156968516	156969443	1.14702	3.46169	40.5481	2.93e-08	2e-06	Treg_IK_UnstimVSTreg_WT_Unstim	ENSMUST00000055322+Ier5-201	ENSMUST00000055322	Ier5-201
OCR_1283	chr1	40443012	40443438	1.14643	1.93684	19.6414	4.02e-05	0.000528124	Treg_IK_UnstimVSTreg_WT_Unstim	ENSMUST00000174335+Il1rl1-003	ENSMUST00000174335	Il1rl1-003
OCR_45445	chr16	36602568	36603291	1.14618	3.91571	58.1891	2.65e-10	4.65e-08	Treg_IK_UnstimVSTreg_WT_Unstim	ENSMUST00000154485+Cd86-004	ENSMUST00000154485	Cd86-004
OCR_82762	chr4	137775333	137775609	1.14598	2.54374	31.1249	6.08e-07	2.17e-05	Treg_IK_UnstimVSTreg_WT_Unstim	ENSMUST00000130071+Hp1bp3-005	ENSMUST00000130071	Hp1bp3-005
OCR_47075	chr16	76336943	76337627	1.14382	4.8485	91.2114	1.3e-13	1.06e-10	Treg_IK_UnstimVSTreg_WT_Unstim	ENSMUST00000140483+Nrip1-006	ENSMUST00000140483	Nrip1-006
OCR_36416	chr14	70065868	70067276	1.14225	3.19029	19.0946	0.000167755	0.00156524	Treg_IK_UnstimVSTreg_WT_Unstim	ENSMUST00000137838+Gm16867-202	ENSMUST00000137838	Gm16867-202
OCR_88646	chr5	114625534	114626398	1.14045	3.45164	43.0302	1.39e-08	1.11e-06	Treg_IK_UnstimVSTreg_WT_Unstim	ENSMUST00000146841+Acacb-002	ENSMUST00000146841	Acacb-002
OCR_86368	chr5	64547439	64547735	1.14042	3.10327	38.0749	6.3e-08	3.63e-06	Treg_IK_UnstimVSTreg_WT_Unstim	ENSMUST00000043893+Tbc1d1-001	ENSMUST00000043893	Tbc1d1-001
OCR_87054	chr5	77836241	77837325	1.13972	4.06199	61.9369	8.01e-11	1.72e-08	Treg_IK_UnstimVSTreg_WT_Unstim	ENSMUST00000072884+Igfbp7-202	ENSMUST00000072884	Igfbp7-202
OCR_11695	chr10	59360369	59360606	1.13873	2.78301	34.3104	2.1e-07	9.44e-06	Treg_IK_UnstimVSTreg_WT_Unstim	ENSMUST00000020309+Dnajb12-005	ENSMUST00000020309	Dnajb12-005
OCR_99168	chr7	24992615	24993351	1.13864	2.74797	26.544	3.11e-06	7.61e-05	Treg_IK_UnstimVSTreg_WT_Unstim	ENSMUST00000160563+Zfp111-005	ENSMUST00000160563	Zfp111-005
OCR_12213	chr10	68257454	68258671	1.13864	4.21237	68.222	1.73e-11	4.97e-09	Treg_IK_UnstimVSTreg_WT_Unstim	ENSMUST00000166611+Tmem26-202	ENSMUST00000166611	Tmem26-202
OCR_82453	chr4	133909853	133910290	1.13795	2.90051	34.4707	2e-07	9.1e-06	Treg_IK_UnstimVSTreg_WT_Unstim	ENSMUST00000081094+Slc30a2-002	ENSMUST00000081094	Slc30a2-002
OCR_95743	chr6	108654295	108655227	1.1379	4.04144	66.6215	2.54e-11	6.71e-09	Treg_IK_UnstimVSTreg_WT_Unstim	ENSMUST00000137478+0610040F04Rik-001	ENSMUST00000137478	0610040F04Rik-001
OCR_18606	chr11	67905349	67906301	1.13664	2.88866	35.0899	1.63e-07	7.7e-06	Treg_IK_UnstimVSTreg_WT_Unstim	ENSMUST00000120312+Gm12304-001	ENSMUST00000120312	Gm12304-001
OCR_53138	chr17	88673446	88674599	1.13579	3.73434	57.9092	2.23e-10	4.01e-08	Treg_IK_UnstimVSTreg_WT_Unstim	ENSMUST00000158166+U6.781-201	ENSMUST00000158166	U6.781-201
OCR_54047	chr18	21115050	21116083	1.13526	4.45906	79.3209	1.38e-12	6.78e-10	Treg_IK_UnstimVSTreg_WT_Unstim	ENSMUST00000035927+Rnf125-201	ENSMUST00000035927	Rnf125-201
OCR_13960	chr10	95376772	95377983	1.13514	4.25828	66.5679	2.57e-11	6.75e-09	Treg_IK_UnstimVSTreg_WT_Unstim	ENSMUST00000104080+SNORA17.68-201	ENSMUST00000104080	SNORA17.68-201
OCR_16043	chr11	4095407	4096035	1.13446	3.3011	43.9505	1.05e-08	9.07e-07	Treg_IK_UnstimVSTreg_WT_Unstim	ENSMUST00000147485+Tbc1d10a-002	ENSMUST00000147485	Tbc1d10a-002
OCR_116286	chr9	118996993	118998032	1.13352	4.06691	59.0729	1.65e-10	3.15e-08	Treg_IK_UnstimVSTreg_WT_Unstim	ENSMUST00000010804+Plcd1-201	ENSMUST00000010804	Plcd1-201
OCR_96603	chr6	122548241	122548790	1.13325	3.10416	41.5335	2.17e-08	1.58e-06	Treg_IK_UnstimVSTreg_WT_Unstim	ENSMUST00000112587+Apobec1-201	ENSMUST00000112587	Apobec1-201
OCR_94558	chr6	87397190	87397638	1.13235	2.47365	28.6356	1.43e-06	4.24e-05	Treg_IK_UnstimVSTreg_WT_Unstim	ENSMUST00000032125+Bmp10-201	ENSMUST00000032125	Bmp10-201
OCR_36598	chr14	73286582	73287214	1.13224	2.84988	28.8899	1.57e-06	4.51e-05	Treg_IK_UnstimVSTreg_WT_Unstim	ENSMUST00000044664+Cysltr2-201	ENSMUST00000044664	Cysltr2-201
OCR_32539	chr13	108647057	108647901	1.13186	4.26212	68.7335	1.53e-11	4.49e-09	Treg_IK_UnstimVSTreg_WT_Unstim	ENSMUST00000175593+AC165250.1-201	ENSMUST00000175593	AC165250.1-201
OCR_71289	chr3	51738613	51739382	1.13173	2.6551	30.391	7.8e-07	2.64e-05	Treg_IK_UnstimVSTreg_WT_Unstim	ENSMUST00000099103+Gm10728-201	ENSMUST00000099103	Gm10728-201
OCR_117572	chrX	83115340	83116133	1.13171	2.81504	33.6503	2.61e-07	1.13e-05	Treg_IK_UnstimVSTreg_WT_Unstim	ENSMUST00000113976+5430427O19Rik-001	ENSMUST00000113976	5430427O19Rik-001
OCR_63830	chr2	76525955	76526851	1.1314	2.74813	29.2498	1.16e-06	3.59e-05	Treg_IK_UnstimVSTreg_WT_Unstim	ENSMUST00000125119+Plekha3-002	ENSMUST00000125119	Plekha3-002
OCR_73992	chr3	108584395	108584805	1.1309	1.84615	14.7853	0.00033508	0.00266939	Treg_IK_UnstimVSTreg_WT_Unstim	ENSMUST00000124903+Stxbp3a-006	ENSMUST00000124903	Stxbp3a-006
OCR_59352	chr19	47433615	47434135	1.13003	2.07064	13.3333	0.000595013	0.00414818	Treg_IK_UnstimVSTreg_WT_Unstim	ENSMUST00000081619+Sh3pxd2a-201	ENSMUST00000081619	Sh3pxd2a-201
OCR_58944	chr19	40740283	40740775	1.1298	2.21065	19.1691	4.85e-05	0.000610005	Treg_IK_UnstimVSTreg_WT_Unstim	ENSMUST00000144080+Entpd1-006	ENSMUST00000144080	Entpd1-006
OCR_58322	chr19	21623532	21624808	1.12978	3.18477	45.5479	6.61e-09	6.25e-07	Treg_IK_UnstimVSTreg_WT_Unstim	ENSMUST00000112772+Gm3443-201	ENSMUST00000112772	Gm3443-201
OCR_38216	chr14	119626763	119627503	1.12865	2.15872	18.52	6.28e-05	0.000745202	Treg_IK_UnstimVSTreg_WT_Unstim	ENSMUST00000065904+Hs6st3-201	ENSMUST00000065904	Hs6st3-201
OCR_30310	chr13	67100007	67100775	1.12825	2.63415	27.3925	2.22e-06	5.86e-05	Treg_IK_UnstimVSTreg_WT_Unstim	ENSMUST00000167565+Zfp712-201	ENSMUST00000167565	Zfp712-201
OCR_75768	chr3	145859227	145859820	1.12788	2.59977	29.6628	1e-06	3.2e-05	Treg_IK_UnstimVSTreg_WT_Unstim	ENSMUST00000169984+Mcoln2-004	ENSMUST00000169984	Mcoln2-004
OCR_66554	chr2	135518043	135519051	1.12696	3.66908	50.0192	1.85e-09	2.32e-07	Treg_IK_UnstimVSTreg_WT_Unstim	ENSMUST00000152250+Gm14211-001	ENSMUST00000152250	Gm14211-001
OCR_32054	chr13	101087338	101087797	1.12688	2.27584	23.2832	9.93e-06	0.000184709	Treg_IK_UnstimVSTreg_WT_Unstim	ENSMUST00000118574+Naip6-001	ENSMUST00000118574	Naip6-001
OCR_80077	chr4	88808450	88808803	1.12671	1.90778	15.7536	0.000194884	0.00175517	Treg_IK_UnstimVSTreg_WT_Unstim	ENSMUST00000120724+Gm12607-001	ENSMUST00000120724	Gm12607-001
OCR_116100	chr9	116010370	116011412	1.12636	2.85707	31.3419	5.65e-07	2.04e-05	Treg_IK_UnstimVSTreg_WT_Unstim	ENSMUST00000117563+Gm9385-001	ENSMUST00000117563	Gm9385-001
OCR_63754	chr2	75523473	75524042	1.12621	4.13161	41.8083	4.24e-07	1.62e-05	Treg_IK_UnstimVSTreg_WT_Unstim	ENSMUST00000158390+U6.830-201	ENSMUST00000158390	U6.830-201
OCR_49809	chr17	29614234	29615022	1.12597	3.02361	35.3694	1.49e-07	7.19e-06	Treg_IK_UnstimVSTreg_WT_Unstim	ENSMUST00000024811+Pim1-201	ENSMUST00000024811	Pim1-201
OCR_101583	chr7	82825894	82826363	1.1253	2.66713	28.0516	1.76e-06	4.94e-05	Treg_IK_UnstimVSTreg_WT_Unstim	ENSMUST00000157271+U6.614-201	ENSMUST00000157271	U6.614-201
OCR_71297	chr3	51821395	51822261	1.12526	2.91538	30.544	7.41e-07	2.54e-05	Treg_IK_UnstimVSTreg_WT_Unstim	ENSMUST00000121440+Maml3-001	ENSMUST00000121440	Maml3-001
OCR_58851	chr19	37407538	37408360	1.12481	2.99227	34.02	2.64e-07	1.13e-05	Treg_IK_UnstimVSTreg_WT_Unstim	ENSMUST00000131070+Ide-001	ENSMUST00000131070	Ide-001
OCR_33102	chr13	117779119	117779530	1.12458	3.43044	48.678	2.7e-09	3.1e-07	Treg_IK_UnstimVSTreg_WT_Unstim	ENSMUST00000022239+Parp8-201	ENSMUST00000022239	Parp8-201
OCR_50582	chr17	44693839	44694667	1.12359	3.13445	43.4592	1.22e-08	1e-06	Treg_IK_UnstimVSTreg_WT_Unstim	ENSMUST00000160203+Gm16317-001	ENSMUST00000160203	Gm16317-001
OCR_36285	chr14	67464195	67465125	1.1235	2.63714	27.7311	1.97e-06	5.37e-05	Treg_IK_UnstimVSTreg_WT_Unstim	ENSMUST00000022629+Dpysl2-001	ENSMUST00000022629	Dpysl2-001
OCR_52540	chr17	80567073	80568052	1.12246	4.85722	79.1549	1.62e-12	7.46e-10	Treg_IK_UnstimVSTreg_WT_Unstim	ENSMUST00000133955+Galm-002	ENSMUST00000133955	Galm-002
OCR_24146	chr12	60288841	60289895	1.12154	2.69908	24.5918	6.11e-06	0.000127109	Treg_IK_UnstimVSTreg_WT_Unstim	ENSMUST00000175685+Ctage5-020	ENSMUST00000175685	Ctage5-020
OCR_83713	chr4	151561457	151561689	1.12138	2.3714	26.2768	3.31e-06	7.94e-05	Treg_IK_UnstimVSTreg_WT_Unstim	ENSMUST00000030779+Acot7-002	ENSMUST00000030779	Acot7-002
OCR_117078	chrX	34148969	34149594	1.12113	2.25896	24.7327	5.8e-06	0.000122438	Treg_IK_UnstimVSTreg_WT_Unstim	ENSMUST00000166283+Pgrmc1-201	ENSMUST00000166283	Pgrmc1-201
OCR_22465	chr12	17516185	17516409	1.12069	3.03695	31.5328	1.11e-06	3.46e-05	Treg_IK_UnstimVSTreg_WT_Unstim	ENSMUST00000171737+Odc1-202	ENSMUST00000171737	Odc1-202
OCR_88377	chr5	111023481	111023963	1.1205	4.97958	82.9977	1.55e-12	7.29e-10	Treg_IK_UnstimVSTreg_WT_Unstim	ENSMUST00000165856+Galnt9-202	ENSMUST00000165856	Galnt9-202
OCR_117674	chrX	93317927	93318284	1.12038	2.2937	23.5952	8.84e-06	0.000168924	Treg_IK_UnstimVSTreg_WT_Unstim	ENSMUST00000135027+Msn-003	ENSMUST00000135027	Msn-003
OCR_65629	chr2	118484797	118485308	1.12	2.904	30.1396	9.18e-07	2.98e-05	Treg_IK_UnstimVSTreg_WT_Unstim	ENSMUST00000099557+Pak6-001	ENSMUST00000099557	Pak6-001
OCR_100684	chr7	63114530	63115329	1.11975	3.02781	32.7224	3.55e-07	1.41e-05	Treg_IK_UnstimVSTreg_WT_Unstim	ENSMUST00000163845+Cyfip1-006	ENSMUST00000163845	Cyfip1-006
OCR_19596	chr11	86465927	86466565	1.11922	3.22598	39.521	4.02e-08	2.58e-06	Treg_IK_UnstimVSTreg_WT_Unstim	ENSMUST00000127267+Vmp1-006	ENSMUST00000127267	Vmp1-006
OCR_83711	chr4	151559230	151560403	1.11894	5.43874	106.848	5.79e-15	7.81e-12	Treg_IK_UnstimVSTreg_WT_Unstim	ENSMUST00000124548+Acot7-004	ENSMUST00000124548	Acot7-004
OCR_87051	chr5	77815327	77815651	1.11866	1.67885	14.9506	0.000273304	0.00228621	Treg_IK_UnstimVSTreg_WT_Unstim	ENSMUST00000072884+Igfbp7-202	ENSMUST00000072884	Igfbp7-202
OCR_17173	chr11	31637877	31638345	1.11825	1.79116	16.1146	0.000167638	0.00156507	Treg_IK_UnstimVSTreg_WT_Unstim	ENSMUST00000109417+Bod1-201	ENSMUST00000109417	Bod1-201
OCR_13882	chr10	94654620	94654904	1.11711	1.7728	14.8896	0.000280462	0.00232872	Treg_IK_UnstimVSTreg_WT_Unstim	ENSMUST00000099332+Cradd-202	ENSMUST00000099332	Cradd-202
OCR_104321	chr7	135815430	135816519	1.11671	2.90779	29.3039	1.35e-06	4.04e-05	Treg_IK_UnstimVSTreg_WT_Unstim	ENSMUST00000130789+Inpp5f-008	ENSMUST00000130789	Inpp5f-008
OCR_29331	chr13	45744474	45745136	1.11602	3.26857	34.7111	5.35e-07	1.96e-05	Treg_IK_UnstimVSTreg_WT_Unstim	ENSMUST00000129176+Gmpr-003	ENSMUST00000129176	Gmpr-003
OCR_106968	chr8	41507337	41507998	1.11577	4.95373	79.3879	3.24e-12	1.26e-09	Treg_IK_UnstimVSTreg_WT_Unstim	ENSMUST00000049389+Zdhhc2-001	ENSMUST00000049389	Zdhhc2-001
OCR_94488	chr6	86497329	86497653	1.11527	2.18212	21.6779	1.82e-05	0.000291982	Treg_IK_UnstimVSTreg_WT_Unstim	ENSMUST00000128779+1600020E01Rik-202	ENSMUST00000128779	1600020E01Rik-202
OCR_52535	chr17	80547368	80548083	1.11491	2.89006	29.9562	9.06e-07	2.96e-05	Treg_IK_UnstimVSTreg_WT_Unstim	ENSMUST00000133955+Galm-002	ENSMUST00000133955	Galm-002
OCR_97858	chr6	142758833	142759286	1.1147	2.255	23.0225	1.09e-05	0.000198364	Treg_IK_UnstimVSTreg_WT_Unstim	ENSMUST00000100821+Gm7457-001	ENSMUST00000100821	Gm7457-001
OCR_113149	chr9	48794795	48795134	1.11449	2.8411	31.7001	5e-07	1.84e-05	Treg_IK_UnstimVSTreg_WT_Unstim	ENSMUST00000047349+Usp28-202	ENSMUST00000047349	Usp28-202
OCR_7741	chr1	181441807	181442568	1.11395	2.88143	32.4777	3.85e-07	1.5e-05	Treg_IK_UnstimVSTreg_WT_Unstim	ENSMUST00000111133+Smyd3-201	ENSMUST00000111133	Smyd3-201
OCR_98531	chr7	3411440	3412070	1.11395	2.38417	22.887	1.15e-05	0.000205949	Treg_IK_UnstimVSTreg_WT_Unstim	ENSMUST00000108647+Cacng6-201	ENSMUST00000108647	Cacng6-201
OCR_64569	chr2	93264565	93265541	1.1128	5.84306	120.082	5.72e-16	1.42e-12	Treg_IK_UnstimVSTreg_WT_Unstim	ENSMUST00000126772+Cd82-010	ENSMUST00000126772	Cd82-010
OCR_29257	chr13	44412891	44413278	1.11212	2.49137	29.3298	1.12e-06	3.5e-05	Treg_IK_UnstimVSTreg_WT_Unstim	ENSMUST00000159595+Gm5083-002	ENSMUST00000159595	Gm5083-002
OCR_25419	chr12	89646447	89647455	1.11206	4.89347	83.6105	5.5e-13	3.17e-10	Treg_IK_UnstimVSTreg_WT_Unstim	ENSMUST00000166940+Adck1-202	ENSMUST00000166940	Adck1-202
OCR_105606	chr8	10006122	10007641	1.11094	4.66067	71.1418	8.71e-12	2.78e-09	Treg_IK_UnstimVSTreg_WT_Unstim	ENSMUST00000164629+Tnfsf13b-202	ENSMUST00000164629	Tnfsf13b-202
OCR_20985	chr11	109274469	109274833	1.11066	1.84993	14.4284	0.000341357	0.00270813	Treg_IK_UnstimVSTreg_WT_Unstim	ENSMUST00000055404+9930022D16Rik-001	ENSMUST00000055404	9930022D16Rik-001
OCR_95985	chr6	114728616	114728945	1.11034	2.27257	24.7451	5.77e-06	0.000122145	Treg_IK_UnstimVSTreg_WT_Unstim	ENSMUST00000123478+Vgll4-006	ENSMUST00000123478	Vgll4-006
OCR_103964	chr7	130416360	130417231	1.1103	3.6538	52.5078	9.35e-10	1.36e-07	Treg_IK_UnstimVSTreg_WT_Unstim	ENSMUST00000131209+Slc5a11-007	ENSMUST00000131209	Slc5a11-007
OCR_36395	chr14	69896058	69896602	1.10959	2.24397	16.5005	0.00014285	0.00138355	Treg_IK_UnstimVSTreg_WT_Unstim	ENSMUST00000037064+Slc25a37-201	ENSMUST00000037064	Slc25a37-201
OCR_17351	chr11	34001760	34002354	1.10917	3.01648	35.6865	1.35e-07	6.64e-06	Treg_IK_UnstimVSTreg_WT_Unstim	ENSMUST00000141450+4930469K13Rik-001	ENSMUST00000141450	4930469K13Rik-001
OCR_67511	chr2	151793442	151793922	1.10897	2.74976	30.4987	7.52e-07	2.57e-05	Treg_IK_UnstimVSTreg_WT_Unstim	ENSMUST00000157866+Mir1953-201	ENSMUST00000157866	Mir1953-201
OCR_29369	chr13	46012584	46013047	1.10787	2.08756	19.9531	3.56e-05	0.000482925	Treg_IK_UnstimVSTreg_WT_Unstim	ENSMUST00000167708+Atxn1-202	ENSMUST00000167708	Atxn1-202
OCR_37417	chr14	99431479	99432446	1.10734	2.85055	32.9033	3.35e-07	1.36e-05	Treg_IK_UnstimVSTreg_WT_Unstim	ENSMUST00000042662+Mzt1-201	ENSMUST00000042662	Mzt1-201
OCR_81550	chr4	119955814	119956040	1.10723	2.91186	33.131	3.1e-07	1.28e-05	Treg_IK_UnstimVSTreg_WT_Unstim	ENSMUST00000102656+Foxo6-001	ENSMUST00000102656	Foxo6-001
OCR_80383	chr4	97537958	97538940	1.10694	3.35537	42.441	1.65e-08	1.28e-06	Treg_IK_UnstimVSTreg_WT_Unstim	ENSMUST00000148930+Nfia-007	ENSMUST00000148930	Nfia-007
OCR_77160	chr4	11062267	11062940	1.10677	3.67575	41.3579	3.75e-08	2.43e-06	Treg_IK_UnstimVSTreg_WT_Unstim	ENSMUST00000121003+Gm11829-001	ENSMUST00000121003	Gm11829-001
OCR_62074	chr2	44200190	44201260	1.10658	5.07931	94.0448	6.53e-14	6.31e-11	Treg_IK_UnstimVSTreg_WT_Unstim	ENSMUST00000157499+U6.649-201	ENSMUST00000157499	U6.649-201
OCR_9150	chr10	7664008	7664590	1.10615	2.43978	23.2062	1.02e-05	0.000188052	Treg_IK_UnstimVSTreg_WT_Unstim	ENSMUST00000147938+Tab2-002	ENSMUST00000147938	Tab2-002
OCR_36727	chr14	75586082	75586463	1.10603	3.10045	31.3805	5.87e-07	2.11e-05	Treg_IK_UnstimVSTreg_WT_Unstim	ENSMUST00000131802+Lcp1-003	ENSMUST00000131802	Lcp1-003
OCR_63622	chr2	73184190	73185030	1.10594	2.37788	20.435	2.95e-05	0.000419968	Treg_IK_UnstimVSTreg_WT_Unstim	ENSMUST00000150705+Gm13703-001	ENSMUST00000150705	Gm13703-001
OCR_59451	chr19	53478716	53479437	1.10589	2.33669	18.7149	7.13e-05	0.000815143	Treg_IK_UnstimVSTreg_WT_Unstim	ENSMUST00000025997+Smndc1-201	ENSMUST00000025997	Smndc1-201
OCR_36075	chr14	63742462	63743135	1.10576	3.09446	33.4629	2.78e-07	1.18e-05	Treg_IK_UnstimVSTreg_WT_Unstim	ENSMUST00000006235+Ctsb-201	ENSMUST00000006235	Ctsb-201
OCR_70488	chr3	30663930	30665137	1.10566	3.22878	41.7805	2.02e-08	1.5e-06	Treg_IK_UnstimVSTreg_WT_Unstim	ENSMUST00000172593+Samd7-003	ENSMUST00000172593	Samd7-003
OCR_112348	chr9	31409886	31410907	1.10529	2.95957	28.5728	1.46e-06	4.31e-05	Treg_IK_UnstimVSTreg_WT_Unstim	ENSMUST00000048050+Tmem45b-201	ENSMUST00000048050	Tmem45b-201
OCR_97479	chr6	136491711	136492089	1.10508	1.63569	14.9887	0.000268924	0.00225753	Treg_IK_UnstimVSTreg_WT_Unstim	ENSMUST00000032335+Atf7ip-201	ENSMUST00000032335	Atf7ip-201
OCR_111604	chr9	13505966	13506646	1.10426	4.49862	61.8524	1.05e-10	2.17e-08	Treg_IK_UnstimVSTreg_WT_Unstim	ENSMUST00000161245+Maml2-002	ENSMUST00000161245	Maml2-002
OCR_40005	chr15	38174417	38175310	1.10392	4.12529	56.128	3.55e-10	5.86e-08	Treg_IK_UnstimVSTreg_WT_Unstim	ENSMUST00000164546+Gm8705-201	ENSMUST00000164546	Gm8705-201
OCR_24846	chr12	78391903	78392486	1.10312	2.9307	36.2252	1.13e-07	5.75e-06	Treg_IK_UnstimVSTreg_WT_Unstim	ENSMUST00000062804+Fut8-201	ENSMUST00000062804	Fut8-201
OCR_39752	chr15	33976071	33976708	1.10162	3.11017	32.3498	4.02e-07	1.56e-05	Treg_IK_UnstimVSTreg_WT_Unstim	ENSMUST00000172082+Mtdh-002	ENSMUST00000172082	Mtdh-002
OCR_55735	chr18	60541751	60542462	1.10142	3.60914	41.7734	2.02e-08	1.5e-06	Treg_IK_UnstimVSTreg_WT_Unstim	ENSMUST00000032473+Iigp1-201	ENSMUST00000032473	Iigp1-201
OCR_38432	chr14	121834846	121835605	1.10133	2.94708	32.2666	4.14e-07	1.59e-05	Treg_IK_UnstimVSTreg_WT_Unstim	ENSMUST00000079817+Stk24-201	ENSMUST00000079817	Stk24-201
OCR_78341	chr4	45596777	45597366	1.10112	2.69005	28.7853	1.36e-06	4.06e-05	Treg_IK_UnstimVSTreg_WT_Unstim	ENSMUST00000119140+Gm12411-001	ENSMUST00000119140	Gm12411-001
OCR_24781	chr12	77638445	77638814	1.10002	2.21536	16.5898	0.000138419	0.00135278	Treg_IK_UnstimVSTreg_WT_Unstim	ENSMUST00000075249+Plekhg3-201	ENSMUST00000075249	Plekhg3-201
OCR_56775	chr18	78224703	78225190	1.09989	2.38571	25.5794	4.26e-06	9.68e-05	Treg_IK_UnstimVSTreg_WT_Unstim	ENSMUST00000170760+Siglec15-001	ENSMUST00000170760	Siglec15-001
OCR_107486	chr8	60056644	60056849	1.09974	2.65539	30.5889	7.29e-07	2.51e-05	Treg_IK_UnstimVSTreg_WT_Unstim	ENSMUST00000145057+Gm10284-001	ENSMUST00000145057	Gm10284-001
OCR_26003	chr12	102109460	102109835	1.09952	2.01394	18.1007	7.43e-05	0.000843213	Treg_IK_UnstimVSTreg_WT_Unstim	ENSMUST00000124957+9030617O03Rik-006	ENSMUST00000124957	9030617O03Rik-006
OCR_6816	chr1	165960917	165961638	1.09935	2.80787	34.0961	2.26e-07	1e-05	Treg_IK_UnstimVSTreg_WT_Unstim	ENSMUST00000027874+Sele-201	ENSMUST00000027874	Sele-201
OCR_80382	chr4	97527449	97528320	1.09921	4.79749	80.1694	1.15e-12	5.75e-10	Treg_IK_UnstimVSTreg_WT_Unstim	ENSMUST00000148930+Nfia-007	ENSMUST00000148930	Nfia-007
OCR_78827	chr4	55788553	55789557	1.0989	3.60483	43.6531	1.15e-08	9.65e-07	Treg_IK_UnstimVSTreg_WT_Unstim	ENSMUST00000123620+Gm12506-001	ENSMUST00000123620	Gm12506-001
OCR_92205	chr6	33754767	33755353	1.09842	2.86618	32.8318	3.43e-07	1.38e-05	Treg_IK_UnstimVSTreg_WT_Unstim	ENSMUST00000134653+Exoc4-010	ENSMUST00000134653	Exoc4-010
OCR_84826	chr5	23890181	23890685	1.09713	3.45139	40.3564	3.11e-08	2.1e-06	Treg_IK_UnstimVSTreg_WT_Unstim	ENSMUST00000156403+Gm15587-002	ENSMUST00000156403	Gm15587-002
OCR_23347	chr12	36914337	36915142	1.09697	3.4693	43.9927	1.04e-08	9e-07	Treg_IK_UnstimVSTreg_WT_Unstim	ENSMUST00000020853+1700108M19Rik-001	ENSMUST00000020853	1700108M19Rik-001
OCR_73586	chr3	101721536	101722055	1.09669	3.91593	54.8622	4.97e-10	7.82e-08	Treg_IK_UnstimVSTreg_WT_Unstim	ENSMUST00000106928+Slc22a15-202	ENSMUST00000106928	Slc22a15-202
OCR_98888	chr7	17264547	17264925	1.09656	1.85718	16.1808	0.000163086	0.00152981	Treg_IK_UnstimVSTreg_WT_Unstim	ENSMUST00000108498+Ceacam15-201	ENSMUST00000108498	Ceacam15-201
OCR_88019	chr5	105742301	105742826	1.09655	1.9687	15.5312	0.000213921	0.00188597	Treg_IK_UnstimVSTreg_WT_Unstim	ENSMUST00000050011+Gbp6-201	ENSMUST00000050011	Gbp6-201
OCR_39870	chr15	36386186	36386483	1.09643	2.09181	16.9823	0.000117143	0.0011891	Treg_IK_UnstimVSTreg_WT_Unstim	ENSMUST00000057486+Ankrd46-201	ENSMUST00000057486	Ankrd46-201
OCR_90731	chr5	149184798	149185353	1.09578	3.61307	51.4355	1.25e-09	1.71e-07	Treg_IK_UnstimVSTreg_WT_Unstim	ENSMUST00000138596+Slc7a1-003	ENSMUST00000138596	Slc7a1-003
OCR_52556	chr17	80759500	80760211	1.09568	3.1308	38.166	6.12e-08	3.54e-06	Treg_IK_UnstimVSTreg_WT_Unstim	ENSMUST00000086549+Gm10190-201	ENSMUST00000086549	Gm10190-201
OCR_639	chr1	21509774	21511008	1.09346	4.55049	70.9583	9.09e-12	2.87e-09	Treg_IK_UnstimVSTreg_WT_Unstim	ENSMUST00000119064+Gm7658-001	ENSMUST00000119064	Gm7658-001
OCR_41150	chr15	66990162	66990475	1.09315	2.20011	20.062	3.41e-05	0.000467761	Treg_IK_UnstimVSTreg_WT_Unstim	ENSMUST00000092640+St3gal1-202	ENSMUST00000092640	St3gal1-202
OCR_26162	chr12	104683294	104683622	1.09298	2.74614	31.8782	4.71e-07	1.76e-05	Treg_IK_UnstimVSTreg_WT_Unstim	ENSMUST00000055071+Ifi27l2a-001	ENSMUST00000055071	Ifi27l2a-001
OCR_18119	chr11	54941397	54941779	1.09272	2.94994	37.0946	8.58e-08	4.62e-06	Treg_IK_UnstimVSTreg_WT_Unstim	ENSMUST00000121611+Mup-ps22-001	ENSMUST00000121611	Mup-ps22-001
OCR_22456	chr12	17447008	17448004	1.09243	3.92182	50.0932	1.82e-09	2.3e-07	Treg_IK_UnstimVSTreg_WT_Unstim	ENSMUST00000175296+Mir3066-201	ENSMUST00000175296	Mir3066-201
OCR_22445	chr12	17384442	17384891	1.09217	3.37458	41.2108	2.39e-08	1.7e-06	Treg_IK_UnstimVSTreg_WT_Unstim	ENSMUST00000175296+Mir3066-201	ENSMUST00000175296	Mir3066-201
OCR_70014	chr3	19885991	19886825	1.09196	3.10195	38.2309	6e-08	3.49e-06	Treg_IK_UnstimVSTreg_WT_Unstim	ENSMUST00000172860+Cp-012	ENSMUST00000172860	Cp-012
OCR_10409	chr10	30498084	30498497	1.09136	2.15251	19.0568	5.07e-05	0.000631524	Treg_IK_UnstimVSTreg_WT_Unstim	ENSMUST00000068567+Ncoa7-201	ENSMUST00000068567	Ncoa7-201
OCR_58264	chr19	18682361	18682854	1.09125	2.50819	22.8923	1.18e-05	0.000209151	Treg_IK_UnstimVSTreg_WT_Unstim	ENSMUST00000138860+Ostf1-003	ENSMUST00000138860	Ostf1-003
OCR_19714	chr11	87916754	87917208	1.09106	2.48287	28.3347	1.59e-06	4.56e-05	Treg_IK_UnstimVSTreg_WT_Unstim	ENSMUST00000133149+Cuedc1-003	ENSMUST00000133149	Cuedc1-003
OCR_8098	chr1	186677146	186677726	1.09046	3.40149	41.5102	2.19e-08	1.58e-06	Treg_IK_UnstimVSTreg_WT_Unstim	ENSMUST00000157937+7SK.204-201	ENSMUST00000157937	7SK.204-201
OCR_117841	chrX	101955595	101956643	1.09019	2.88704	32.6995	3.58e-07	1.42e-05	Treg_IK_UnstimVSTreg_WT_Unstim	ENSMUST00000122247+Gm14822-001	ENSMUST00000122247	Gm14822-001
OCR_13795	chr10	93534901	93536265	1.09013	3.85543	56.7523	3.02e-10	5.07e-08	Treg_IK_UnstimVSTreg_WT_Unstim	ENSMUST00000141143+Fgd6-002	ENSMUST00000141143	Fgd6-002
OCR_83565	chr4	149780325	149781262	1.09006	4.13218	59.6373	1.43e-10	2.78e-08	Treg_IK_UnstimVSTreg_WT_Unstim	ENSMUST00000037916+Rere-201	ENSMUST00000037916	Rere-201
OCR_62906	chr2	60208133	60209047	1.08995	5.14921	85.2688	6.54e-13	3.59e-10	Treg_IK_UnstimVSTreg_WT_Unstim	ENSMUST00000028362+Ly75-201	ENSMUST00000028362	Ly75-201
OCR_78244	chr4	43986329	43986874	1.08941	3.14724	38.0309	6.39e-08	3.67e-06	Treg_IK_UnstimVSTreg_WT_Unstim	ENSMUST00000095107+Ccin-001	ENSMUST00000095107	Ccin-001
OCR_55922	chr18	62345415	62345910	1.08938	2.3344	22.3991	1.39e-05	0.000237134	Treg_IK_UnstimVSTreg_WT_Unstim	ENSMUST00000067743+Gm9949-201	ENSMUST00000067743	Gm9949-201
OCR_74130	chr3	115344335	115344682	1.08915	2.23832	22.7063	1.23e-05	0.000216934	Treg_IK_UnstimVSTreg_WT_Unstim	ENSMUST00000170875+S1pr1-202	ENSMUST00000170875	S1pr1-202
OCR_117482	chrX	71353886	71354267	1.08889	1.57903	13.1242	0.00060006	0.00417257	Treg_IK_UnstimVSTreg_WT_Unstim	ENSMUST00000033771+Opn1mw-001	ENSMUST00000033771	Opn1mw-001
OCR_95681	chr6	108274353	108275364	1.08877	4.1544	61.6491	8.6e-11	1.82e-08	Treg_IK_UnstimVSTreg_WT_Unstim	ENSMUST00000166013+Itpr1-206	ENSMUST00000166013	Itpr1-206
OCR_75051	chr3	135218960	135219622	1.08862	3.09642	34.3521	2.08e-07	9.34e-06	Treg_IK_UnstimVSTreg_WT_Unstim	ENSMUST00000134478+Manba-010	ENSMUST00000134478	Manba-010
OCR_95694	chr6	108398003	108398910	1.08844	5.0358	89.9533	1.48e-13	1.15e-10	Treg_IK_UnstimVSTreg_WT_Unstim	ENSMUST00000165865+Itpr1-205	ENSMUST00000165865	Itpr1-205
OCR_99064	chr7	19912443	19912857	1.08826	2.5882	21.9811	1.64e-05	0.00026968	Treg_IK_UnstimVSTreg_WT_Unstim	ENSMUST00000003640+Fosb-201	ENSMUST00000003640	Fosb-201
OCR_55925	chr18	62352063	62352475	1.08775	1.9257	16.442	0.000146346	0.00140895	Treg_IK_UnstimVSTreg_WT_Unstim	ENSMUST00000067743+Gm9949-201	ENSMUST00000067743	Gm9949-201
OCR_41085	chr15	66618275	66618653	1.08708	2.25266	19.4876	4.27e-05	0.000554677	Treg_IK_UnstimVSTreg_WT_Unstim	ENSMUST00000166403+Tg-002	ENSMUST00000166403	Tg-002
OCR_29612	chr13	51713838	51714295	1.08693	1.72325	13.4506	0.000520418	0.00374789	Treg_IK_UnstimVSTreg_WT_Unstim	ENSMUST00000075853+Cks2-001	ENSMUST00000075853	Cks2-001
OCR_75325	chr3	138530063	138530741	1.08651	2.5365	20.1737	3.32e-05	0.000458982	Treg_IK_UnstimVSTreg_WT_Unstim	ENSMUST00000121826+Tspan5-004	ENSMUST00000121826	Tspan5-004
OCR_7717	chr1	180954809	180956074	1.08586	4.36678	65.7213	3.15e-11	8.03e-09	Treg_IK_UnstimVSTreg_WT_Unstim	ENSMUST00000129393+Smyd3-006	ENSMUST00000129393	Smyd3-006
OCR_17857	chr11	51650633	51650920	1.0855	2.0104	19.4642	4.31e-05	0.000557618	Treg_IK_UnstimVSTreg_WT_Unstim	ENSMUST00000151277+Phf15-003	ENSMUST00000151277	Phf15-003
OCR_74026	chr3	108975909	108976329	1.08535	1.75333	15.5792	0.000209655	0.00185616	Treg_IK_UnstimVSTreg_WT_Unstim	ENSMUST00000120957+Gm13865-001	ENSMUST00000120957	Gm13865-001
OCR_24956	chr12	80870579	80871201	1.08525	2.10442	18.1485	7.29e-05	0.000830148	Treg_IK_UnstimVSTreg_WT_Unstim	ENSMUST00000171051+Gm17591-201	ENSMUST00000171051	Gm17591-201
OCR_102127	chr7	91344440	91345298	1.085	3.62839	48.1767	3.11e-09	3.47e-07	Treg_IK_UnstimVSTreg_WT_Unstim	ENSMUST00000175002+AC101659.1-201	ENSMUST00000175002	AC101659.1-201
OCR_11387	chr10	53148443	53148940	1.08457	2.92004	37.2111	8.27e-08	4.5e-06	Treg_IK_UnstimVSTreg_WT_Unstim	ENSMUST00000168554+Gm5423-201	ENSMUST00000168554	Gm5423-201
OCR_16017	chr11	3439010	3439764	1.08431	4.4071	63.2079	5.83e-11	1.31e-08	Treg_IK_UnstimVSTreg_WT_Unstim	ENSMUST00000075118+Smtn-003	ENSMUST00000075118	Smtn-003
OCR_111626	chr9	13845931	13846985	1.08424	3.54098	42.5251	1.61e-08	1.26e-06	Treg_IK_UnstimVSTreg_WT_Unstim	ENSMUST00000130106+Fam76b-003	ENSMUST00000130106	Fam76b-003
OCR_44299	chr16	15984383	15984827	1.08384	1.61478	13.4203	0.000527324	0.00378889	Treg_IK_UnstimVSTreg_WT_Unstim	ENSMUST00000104162+n-R5s31-201	ENSMUST00000104162	n-R5s31-201
OCR_108162	chr8	74887330	74887685	1.08377	1.94057	17.4998	9.48e-05	0.00101586	Treg_IK_UnstimVSTreg_WT_Unstim	ENSMUST00000006439+Eps15l1-201	ENSMUST00000006439	Eps15l1-201
OCR_55423	chr18	55019497	55020927	1.0837	5.43606	94.5442	6.59e-14	6.31e-11	Treg_IK_UnstimVSTreg_WT_Unstim	ENSMUST00000168742+Gm17270-201	ENSMUST00000168742	Gm17270-201
OCR_55718	chr18	60398223	60399094	1.08316	2.61679	21.7139	1.8e-05	0.000288837	Treg_IK_UnstimVSTreg_WT_Unstim	ENSMUST00000131638+Gm5970-001	ENSMUST00000131638	Gm5970-001
OCR_78224	chr4	43835573	43836356	1.08296	3.02389	32.1332	4.33e-07	1.65e-05	Treg_IK_UnstimVSTreg_WT_Unstim	ENSMUST00000079465+Olfr156-001	ENSMUST00000079465	Olfr156-001
OCR_88869	chr5	117931033	117932298	1.08287	4.988	84.5738	4.49e-13	2.77e-10	Treg_IK_UnstimVSTreg_WT_Unstim	ENSMUST00000103237+Ksr2-202	ENSMUST00000103237	Ksr2-202
OCR_33658	chr14	14898730	14899010	1.08285	2.73248	30.0491	8.78e-07	2.89e-05	Treg_IK_UnstimVSTreg_WT_Unstim	ENSMUST00000153237+Psmd6-004	ENSMUST00000153237	Psmd6-004
OCR_99351	chr7	26573167	26574095	1.08247	3.01907	20.4725	6.63e-05	0.000774364	Treg_IK_UnstimVSTreg_WT_Unstim	ENSMUST00000163542+Axl-201	ENSMUST00000163542	Axl-201
OCR_43157	chr15	99194540	99195204	1.08234	2.32494	19.2382	4.72e-05	0.000597695	Treg_IK_UnstimVSTreg_WT_Unstim	ENSMUST00000082789+U6.114-201	ENSMUST00000082789	U6.114-201
OCR_58400	chr19	24240696	24241776	1.08215	4.90364	76.1031	4.12e-12	1.53e-09	Treg_IK_UnstimVSTreg_WT_Unstim	ENSMUST00000170948+Tjp2-202	ENSMUST00000170948	Tjp2-202
OCR_51623	chr17	64949376	64949593	1.08212	3.5083	45.8054	6.13e-09	5.95e-07	Treg_IK_UnstimVSTreg_WT_Unstim	ENSMUST00000086723+Man2a1-001	ENSMUST00000086723	Man2a1-001
OCR_5514	chr1	140438770	140439701	1.08211	3.26571	38.9868	4.74e-08	2.95e-06	Treg_IK_UnstimVSTreg_WT_Unstim	ENSMUST00000166904+Nek7-202	ENSMUST00000166904	Nek7-202
OCR_108416	chr8	81679382	81679967	1.08187	3.09309	37.1303	8.49e-08	4.59e-06	Treg_IK_UnstimVSTreg_WT_Unstim	ENSMUST00000155960+Zfp827-005	ENSMUST00000155960	Zfp827-005
OCR_106590	chr8	34554977	34555484	1.08128	1.91138	16.5458	0.000140202	0.00136526	Treg_IK_UnstimVSTreg_WT_Unstim	ENSMUST00000059351+5930422O12Rik-201	ENSMUST00000059351	5930422O12Rik-201
OCR_97252	chr6	134170148	134170971	1.0811	3.57742	45.9883	5.81e-09	5.77e-07	Treg_IK_UnstimVSTreg_WT_Unstim	ENSMUST00000169529+Etv6-004	ENSMUST00000169529	Etv6-004
OCR_4959	chr1	132919093	132919890	1.08106	3.87421	62.2483	7.41e-11	1.6e-08	Treg_IK_UnstimVSTreg_WT_Unstim	ENSMUST00000016673+Il10-001	ENSMUST00000016673	Il10-001
OCR_20942	chr11	108759596	108760213	1.08049	1.99603	14.0454	0.000402315	0.00306709	Treg_IK_UnstimVSTreg_WT_Unstim	ENSMUST00000052915+Axin2-001	ENSMUST00000052915	Axin2-001
OCR_83444	chr4	148773527	148773924	1.08005	2.1785	19.5127	4.23e-05	0.000550152	Treg_IK_UnstimVSTreg_WT_Unstim	ENSMUST00000131986+Ube4b-004	ENSMUST00000131986	Ube4b-004
OCR_63814	chr2	76217171	76217470	1.07979	1.64765	14.5615	0.000322484	0.00259272	Treg_IK_UnstimVSTreg_WT_Unstim	ENSMUST00000046389+Rbm45-001	ENSMUST00000046389	Rbm45-001
OCR_84827	chr5	23893147	23893351	1.0791	2.45681	27.1646	2.41e-06	6.25e-05	Treg_IK_UnstimVSTreg_WT_Unstim	ENSMUST00000128831+Atg9b-002	ENSMUST00000128831	Atg9b-002
OCR_99522	chr7	29648281	29648918	1.07862	3.33016	40.4914	2.98e-08	2.02e-06	Treg_IK_UnstimVSTreg_WT_Unstim	ENSMUST00000138272+Lgals7-003	ENSMUST00000138272	Lgals7-003
OCR_106656	chr8	35203747	35204394	1.07823	4.2663	72.4116	6.5e-12	2.19e-09	Treg_IK_UnstimVSTreg_WT_Unstim	ENSMUST00000033910+Leprotl1-001	ENSMUST00000033910	Leprotl1-001
OCR_98307	chr6	146743809	146745138	1.07697	3.8662	50.755	1.51e-09	1.97e-07	Treg_IK_UnstimVSTreg_WT_Unstim	ENSMUST00000123444+Arntl2-002	ENSMUST00000123444	Arntl2-002
OCR_5807	chr1	146161431	146162007	1.07691	2.53801	24.7133	5.84e-06	0.000123097	Treg_IK_UnstimVSTreg_WT_Unstim	ENSMUST00000172388+Rgs1-001	ENSMUST00000172388	Rgs1-001
OCR_36902	chr14	78847287	78848408	1.07635	2.96959	27.6119	2.05e-06	5.55e-05	Treg_IK_UnstimVSTreg_WT_Unstim	ENSMUST00000123853+Akap11-001	ENSMUST00000123853	Akap11-001
OCR_32471	chr13	107823876	107824586	1.07611	3.031	36.1077	1.18e-07	5.92e-06	Treg_IK_UnstimVSTreg_WT_Unstim	ENSMUST00000095459+3830408C21Rik-201	ENSMUST00000095459	3830408C21Rik-201
OCR_60121	chr2	6610621	6611078	1.07611	2.47869	25.8307	3.89e-06	9.02e-05	Treg_IK_UnstimVSTreg_WT_Unstim	ENSMUST00000002176+Celf2-001	ENSMUST00000002176	Celf2-001
OCR_109107	chr8	93919332	93920262	1.07588	4.69135	75.7835	3.02e-12	1.2e-09	Treg_IK_UnstimVSTreg_WT_Unstim	ENSMUST00000149913+Fto-006	ENSMUST00000149913	Fto-006
OCR_2129	chr1	60976985	60977695	1.07563	4.2154	65.7672	3.12e-11	7.97e-09	Treg_IK_UnstimVSTreg_WT_Unstim	ENSMUST00000144147+Ctla4-003	ENSMUST00000144147	Ctla4-003
OCR_74905	chr3	132741115	132741962	1.07557	3.64349	47.484	3.79e-09	4.08e-07	Treg_IK_UnstimVSTreg_WT_Unstim	ENSMUST00000161577+Gstcd-005	ENSMUST00000161577	Gstcd-005
OCR_91530	chr6	17233898	17234225	1.07552	2.87572	27.8766	1.9e-06	5.22e-05	Treg_IK_UnstimVSTreg_WT_Unstim	ENSMUST00000115462+Cav2-003	ENSMUST00000115462	Cav2-003
OCR_44692	chr16	23272250	23272825	1.07523	3.75514	52.4723	9.44e-10	1.37e-07	Treg_IK_UnstimVSTreg_WT_Unstim	ENSMUST00000128050+St6gal1-003	ENSMUST00000128050	St6gal1-003
OCR_116538	chr9	122784157	122784729	1.07517	2.35947	24.0728	7.4e-06	0.000147536	Treg_IK_UnstimVSTreg_WT_Unstim	ENSMUST00000063980+Zfp167-201	ENSMUST00000063980	Zfp167-201
OCR_2727	chr1	74388519	74389216	1.07507	2.88285	30.5557	7.38e-07	2.53e-05	Treg_IK_UnstimVSTreg_WT_Unstim	ENSMUST00000087225+Pnkd-004	ENSMUST00000087225	Pnkd-004
OCR_82735	chr4	137409458	137410240	1.07489	3.62635	45.3831	6.93e-09	6.48e-07	Treg_IK_UnstimVSTreg_WT_Unstim	ENSMUST00000102518+Ece1-001	ENSMUST00000102518	Ece1-001
OCR_9389	chr10	12701424	12701898	1.0742	2.31488	23.4696	9.26e-06	0.000174731	Treg_IK_UnstimVSTreg_WT_Unstim	ENSMUST00000042861+Stx11-201	ENSMUST00000042861	Stx11-201
OCR_116560	chr9	123144624	123145119	1.0728	2.92651	23.6604	1.55e-05	0.000257236	Treg_IK_UnstimVSTreg_WT_Unstim	ENSMUST00000039229+Cdcp1-001	ENSMUST00000039229	Cdcp1-001
OCR_90658	chr5	147867270	147867910	1.07279	4.70919	78.0699	1.82e-12	8.11e-10	Treg_IK_UnstimVSTreg_WT_Unstim	ENSMUST00000016664+Lnx2-001	ENSMUST00000016664	Lnx2-001
OCR_114032	chr9	69012892	69013802	1.0726	4.05153	57.398	2.55e-10	4.5e-08	Treg_IK_UnstimVSTreg_WT_Unstim	ENSMUST00000132355+Rora-005	ENSMUST00000132355	Rora-005
OCR_103322	chr7	119381280	119382784	1.07214	3.54694	38.7288	5.14e-08	3.13e-06	Treg_IK_UnstimVSTreg_WT_Unstim	ENSMUST00000106647+Mical2-002	ENSMUST00000106647	Mical2-002
OCR_54055	chr18	21140826	21141570	1.07154	3.06216	32.5568	3.75e-07	1.47e-05	Treg_IK_UnstimVSTreg_WT_Unstim	ENSMUST00000052396+Rnf138-201	ENSMUST00000052396	Rnf138-201
OCR_49115	chr17	17200469	17201668	1.07148	3.01515	33.0362	3.2e-07	1.31e-05	Treg_IK_UnstimVSTreg_WT_Unstim	ENSMUST00000127027+Zfp960-001	ENSMUST00000127027	Zfp960-001
OCR_5014	chr1	133357369	133358218	1.07131	2.79462	30.1741	8.41e-07	2.8e-05	Treg_IK_UnstimVSTreg_WT_Unstim	ENSMUST00000102332+AC109299.1-201	ENSMUST00000102332	AC109299.1-201
OCR_60962	chr2	24190531	24191606	1.07107	3.09579	34.6712	1.87e-07	8.63e-06	Treg_IK_UnstimVSTreg_WT_Unstim	ENSMUST00000114487+Il1rn-001	ENSMUST00000114487	Il1rn-001
OCR_47505	chr16	87642425	87642929	1.07063	2.09742	20.8136	2.54e-05	0.000376247	Treg_IK_UnstimVSTreg_WT_Unstim	ENSMUST00000082736+U6.92-201	ENSMUST00000082736	U6.92-201
OCR_29112	chr13	41757907	41758741	1.06984	2.78563	25.8588	3.92e-06	9.09e-05	Treg_IK_UnstimVSTreg_WT_Unstim	ENSMUST00000067176+Gm5082-201	ENSMUST00000067176	Gm5082-201
OCR_35221	chr14	45698365	45699076	1.06959	2.91177	30.7009	7.02e-07	2.44e-05	Treg_IK_UnstimVSTreg_WT_Unstim	ENSMUST00000168000+Gm17173-001	ENSMUST00000168000	Gm17173-001
OCR_81478	chr4	119398551	119399153	1.06935	2.31289	18.2186	7.09e-05	0.000812955	Treg_IK_UnstimVSTreg_WT_Unstim	ENSMUST00000144907+Hivep3-003	ENSMUST00000144907	Hivep3-003
OCR_2006	chr1	59795682	59796341	1.06904	2.93366	26.0619	3.57e-06	8.45e-05	Treg_IK_UnstimVSTreg_WT_Unstim	ENSMUST00000087435+Bmpr2-201	ENSMUST00000087435	Bmpr2-201
OCR_40758	chr15	59424710	59425010	1.06853	3.0785	36.1454	1.16e-07	5.87e-06	Treg_IK_UnstimVSTreg_WT_Unstim	ENSMUST00000067543+Trib1-001	ENSMUST00000067543	Trib1-001
OCR_28251	chr13	22087938	22088304	1.06731	2.46712	27.441	2.18e-06	5.78e-05	Treg_IK_UnstimVSTreg_WT_Unstim	ENSMUST00000129665+Prss16-003	ENSMUST00000129665	Prss16-003
OCR_26150	chr12	104585103	104585578	1.06729	3.14234	35.1463	1.6e-07	7.58e-06	Treg_IK_UnstimVSTreg_WT_Unstim	ENSMUST00000149431+Asb2-002	ENSMUST00000149431	Asb2-002
OCR_68646	chr2	168405100	168405361	1.06706	2.42579	23.3036	9.85e-06	0.000183703	Treg_IK_UnstimVSTreg_WT_Unstim	ENSMUST00000029057+Nfatc2-005	ENSMUST00000029057	Nfatc2-005
OCR_24286	chr12	70202755	70203773	1.06691	4.26952	64.1213	4.66e-11	1.11e-08	Treg_IK_UnstimVSTreg_WT_Unstim	ENSMUST00000119887+Gm15571-001	ENSMUST00000119887	Gm15571-001
OCR_2694	chr1	74009219	74010039	1.06677	2.85411	25.6832	4.1e-06	9.4e-05	Treg_IK_UnstimVSTreg_WT_Unstim	ENSMUST00000068832+Tns1-202	ENSMUST00000068832	Tns1-202
OCR_58229	chr19	16853165	16853397	1.06614	2.13191	20.7551	2.6e-05	0.00038268	Treg_IK_UnstimVSTreg_WT_Unstim	ENSMUST00000051080+Gm9806-201	ENSMUST00000051080	Gm9806-201
OCR_2171	chr1	61197817	61198159	1.06596	2.26908	13.6743	0.000472416	0.00347	Treg_IK_UnstimVSTreg_WT_Unstim	ENSMUST00000118999+Gm11590-001	ENSMUST00000118999	Gm11590-001
OCR_63638	chr2	73297487	73298514	1.06591	4.24232	58.2218	2.06e-10	3.76e-08	Treg_IK_UnstimVSTreg_WT_Unstim	ENSMUST00000145170+Gm13708-001	ENSMUST00000145170	Gm13708-001
OCR_97001	chr6	128785719	128787243	1.06589	5.01428	81.8061	8.07e-13	4.18e-10	Treg_IK_UnstimVSTreg_WT_Unstim	ENSMUST00000166515+Gm17395-201	ENSMUST00000166515	Gm17395-201
OCR_96516	chr6	121053403	121054033	1.06588	2.75653	21.0017	3.16e-05	0.000441988	Treg_IK_UnstimVSTreg_WT_Unstim	ENSMUST00000088567+Mical3-202	ENSMUST00000088567	Mical3-202
OCR_44599	chr16	21995283	21996045	1.0657	3.07763	33.5471	2.7e-07	1.15e-05	Treg_IK_UnstimVSTreg_WT_Unstim	ENSMUST00000060673+Liph-201	ENSMUST00000060673	Liph-201
OCR_54673	chr18	37815420	37815729	1.06463	1.77955	13.3595	0.000541482	0.00386814	Treg_IK_UnstimVSTreg_WT_Unstim	ENSMUST00000097608+3222401L13Rik-201	ENSMUST00000097608	3222401L13Rik-201
OCR_1642	chr1	52201698	52202000	1.06462	1.75273	13.6591	0.00047538	0.00348616	Treg_IK_UnstimVSTreg_WT_Unstim	ENSMUST00000087717+Stat1-202	ENSMUST00000087717	Stat1-202
OCR_45650	chr16	43303332	43304232	1.06453	3.64865	48.6274	2.74e-09	3.12e-07	Treg_IK_UnstimVSTreg_WT_Unstim	ENSMUST00000118889+Gm15711-001	ENSMUST00000118889	Gm15711-001
OCR_15113	chr10	117872255	117872928	1.06431	2.22086	16.8189	0.000125272	0.00124982	Treg_IK_UnstimVSTreg_WT_Unstim	ENSMUST00000068592+Ifng-201	ENSMUST00000068592	Ifng-201
OCR_92588	chr6	41454791	41455684	1.06365	3.29426	40.8042	2.71e-08	1.88e-06	Treg_IK_UnstimVSTreg_WT_Unstim	ENSMUST00000070380+Prss2-001	ENSMUST00000070380	Prss2-001
OCR_108823	chr8	89411863	89412343	1.06314	3.68523	47.2345	4.06e-09	4.33e-07	Treg_IK_UnstimVSTreg_WT_Unstim	ENSMUST00000034074+N4bp1-201	ENSMUST00000034074	N4bp1-201
OCR_632	chr1	21415746	21416295	1.06181	2.45556	23.1817	1.03e-05	0.000189491	Treg_IK_UnstimVSTreg_WT_Unstim	ENSMUST00000126985+Gm16328-001	ENSMUST00000126985	Gm16328-001
OCR_40488	chr15	53320536	53321043	1.06181	2.03705	15.5876	0.000208918	0.00185162	Treg_IK_UnstimVSTreg_WT_Unstim	ENSMUST00000104379+SNORA17.212-201	ENSMUST00000104379	SNORA17.212-201
OCR_41093	chr15	66635358	66635840	1.06173	4.41912	65.361	3.44e-11	8.69e-09	Treg_IK_UnstimVSTreg_WT_Unstim	ENSMUST00000164939+Sla-002	ENSMUST00000164939	Sla-002
OCR_94814	chr6	90759636	90760440	1.06004	4.56761	66.8637	2.39e-11	6.43e-09	Treg_IK_UnstimVSTreg_WT_Unstim	ENSMUST00000101151+Iqsec1-202	ENSMUST00000101151	Iqsec1-202
OCR_77749	chr4	32305395	32305707	1.05948	2.17383	18.8087	5.6e-05	0.000681537	Treg_IK_UnstimVSTreg_WT_Unstim	ENSMUST00000118175+Gm11929-001	ENSMUST00000118175	Gm11929-001
OCR_104407	chr7	137955842	137956505	1.05893	2.76923	27.1991	2.38e-06	6.19e-05	Treg_IK_UnstimVSTreg_WT_Unstim	ENSMUST00000175357+Mir5102-201	ENSMUST00000175357	Mir5102-201
OCR_93477	chr6	59374478	59374934	1.05876	3.58106	44.5534	8.83e-09	7.93e-07	Treg_IK_UnstimVSTreg_WT_Unstim	ENSMUST00000051065+Gprin3-201	ENSMUST00000051065	Gprin3-201
OCR_92080	chr6	31274699	31275305	1.05855	4.47712	66.3697	2.69e-11	7.01e-09	Treg_IK_UnstimVSTreg_WT_Unstim	ENSMUST00000124811+2210408F21Rik-006	ENSMUST00000124811	2210408F21Rik-006
OCR_113237	chr9	50730280	50731127	1.05846	3.90463	49.6252	2.07e-09	2.52e-07	Treg_IK_UnstimVSTreg_WT_Unstim	ENSMUST00000158083+U6.765-201	ENSMUST00000158083	U6.765-201
OCR_6892	chr1	166905666	166906568	1.05802	4.1064	52.0475	1.31e-09	1.78e-07	Treg_IK_UnstimVSTreg_WT_Unstim	ENSMUST00000027860+Xcl1-001	ENSMUST00000027860	Xcl1-001
OCR_97292	chr6	134528005	134528369	1.05795	1.78168	14.2653	0.000366093	0.00285251	Treg_IK_UnstimVSTreg_WT_Unstim	ENSMUST00000126836+Lrp6-002	ENSMUST00000126836	Lrp6-002
OCR_55758	chr18	60808483	60809197	1.0579	2.49898	21.347	2.07e-05	0.000320442	Treg_IK_UnstimVSTreg_WT_Unstim	ENSMUST00000143275+Synpo-008	ENSMUST00000143275	Synpo-008
OCR_55267	chr18	50225249	50226078	1.05769	3.71849	44.0919	1.01e-08	8.79e-07	Treg_IK_UnstimVSTreg_WT_Unstim	ENSMUST00000129164+C030005K06Rik-004	ENSMUST00000129164	C030005K06Rik-004
OCR_1223	chr1	39903889	39904379	1.05766	3.90159	39.8621	1.49e-07	7.19e-06	Treg_IK_UnstimVSTreg_WT_Unstim	ENSMUST00000171319+Gm3646-201	ENSMUST00000171319	Gm3646-201
OCR_9601	chr10	17268443	17269433	1.05659	4.54023	73.8042	4.73e-12	1.71e-09	Treg_IK_UnstimVSTreg_WT_Unstim	ENSMUST00000038107+Cited2-201	ENSMUST00000038107	Cited2-201
OCR_100173	chr7	50694074	50694369	1.05654	2.39203	24.1611	7.16e-06	0.000144048	Treg_IK_UnstimVSTreg_WT_Unstim	ENSMUST00000004731+Nkg7-201	ENSMUST00000004731	Nkg7-201
OCR_90968	chr5	152179418	152180330	1.05586	2.83906	27.0616	2.5e-06	6.45e-05	Treg_IK_UnstimVSTreg_WT_Unstim	ENSMUST00000067770+D730045B01Rik-201	ENSMUST00000067770	D730045B01Rik-201
OCR_33279	chr14	8821822	8822418	1.0558	4.13488	50.0886	5.37e-09	5.41e-07	Treg_IK_UnstimVSTreg_WT_Unstim	ENSMUST00000026315+Dnase1l3-001	ENSMUST00000026315	Dnase1l3-001
OCR_117850	chrX	102911146	102911692	1.05573	2.68577	27.8681	1.88e-06	5.18e-05	Treg_IK_UnstimVSTreg_WT_Unstim	ENSMUST00000117758+Gm14854-001	ENSMUST00000117758	Gm14854-001
OCR_7410	chr1	174520145	174521001	1.05511	2.45578	20.3426	3.05e-05	0.000431127	Treg_IK_UnstimVSTreg_WT_Unstim	ENSMUST00000065679+Slamf8-201	ENSMUST00000065679	Slamf8-201
OCR_32128	chr13	102433900	102434664	1.0549	4.15339	50.0449	4.5e-09	4.7e-07	Treg_IK_UnstimVSTreg_WT_Unstim	ENSMUST00000109325+Gm11016-201	ENSMUST00000109325	Gm11016-201
OCR_28649	chr13	30869575	30870290	1.05479	3.11283	33.6406	2.62e-07	1.13e-05	Treg_IK_UnstimVSTreg_WT_Unstim	ENSMUST00000021784+Irf4-001	ENSMUST00000021784	Irf4-001
OCR_75064	chr3	135273123	135273560	1.05399	3.3098	39.4714	4.08e-08	2.61e-06	Treg_IK_UnstimVSTreg_WT_Unstim	ENSMUST00000129428+Nfkb1-003	ENSMUST00000129428	Nfkb1-003
OCR_92322	chr6	37005063	37005957	1.05345	3.21483	33.0436	3.19e-07	1.31e-05	Treg_IK_UnstimVSTreg_WT_Unstim	ENSMUST00000146656+Dgki-008	ENSMUST00000146656	Dgki-008
OCR_12374	chr10	70826132	70826884	1.05311	3.6713	49.2504	2.3e-09	2.72e-07	Treg_IK_UnstimVSTreg_WT_Unstim	ENSMUST00000141153+Ipmk-007	ENSMUST00000141153	Ipmk-007
OCR_14506	chr10	107370613	107371011	1.05297	2.95706	31.6638	5.18e-07	1.9e-05	Treg_IK_UnstimVSTreg_WT_Unstim	ENSMUST00000165341+Otogl-201	ENSMUST00000165341	Otogl-201
OCR_54705	chr18	38036826	38037952	1.05282	4.36722	62.3052	7.3e-11	1.59e-08	Treg_IK_UnstimVSTreg_WT_Unstim	ENSMUST00000164201+Diap1-204	ENSMUST00000164201	Diap1-204
OCR_92339	chr6	37348818	37349578	1.0526	5.21778	28.4695	0.000165611	0.00154913	Treg_IK_UnstimVSTreg_WT_Unstim	ENSMUST00000041093+Creb3l2-001	ENSMUST00000041093	Creb3l2-001
OCR_117173	chrX	39835367	39835900	1.05247	2.34311	21.6142	1.87e-05	0.000296101	Treg_IK_UnstimVSTreg_WT_Unstim	ENSMUST00000129855+Sh2d1a-003	ENSMUST00000129855	Sh2d1a-003
OCR_14256	chr10	98910630	98911103	1.05243	1.87826	15.5476	0.000212459	0.00187625	Treg_IK_UnstimVSTreg_WT_Unstim	ENSMUST00000167243+Gad1-ps-201	ENSMUST00000167243	Gad1-ps-201
OCR_31388	chr13	89632908	89633915	1.05175	4.25361	56.4487	3.54e-10	5.85e-08	Treg_IK_UnstimVSTreg_WT_Unstim	ENSMUST00000175608+AC154460.1-201	ENSMUST00000175608	AC154460.1-201
OCR_52168	chr17	73500515	73501090	1.05158	3.09036	28.7409	1.38e-06	4.12e-05	Treg_IK_UnstimVSTreg_WT_Unstim	ENSMUST00000131335+Lclat1-004	ENSMUST00000131335	Lclat1-004
OCR_77735	chr4	32213451	32214341	1.05125	4.72974	73.2441	5.37e-12	1.91e-09	Treg_IK_UnstimVSTreg_WT_Unstim	ENSMUST00000119323+Gm11928-001	ENSMUST00000119323	Gm11928-001
OCR_90822	chr5	149829225	149829517	1.05122	2.59937	24.6481	6.42e-06	0.000132355	Treg_IK_UnstimVSTreg_WT_Unstim	ENSMUST00000133243+Gm15411-001	ENSMUST00000133243	Gm15411-001
OCR_81570	chr4	120389740	120390317	1.05102	2.80866	30.2925	8.07e-07	2.71e-05	Treg_IK_UnstimVSTreg_WT_Unstim	ENSMUST00000030376+Kcnq4-001	ENSMUST00000030376	Kcnq4-001
OCR_82060	chr4	129173549	129174295	1.05087	3.30541	35.2639	1.54e-07	7.38e-06	Treg_IK_UnstimVSTreg_WT_Unstim	ENSMUST00000135698+1700125D06Rik-002	ENSMUST00000135698	1700125D06Rik-002
OCR_80101	chr4	89145359	89146268	1.04965	3.79738	41.6748	2.08e-08	1.53e-06	Treg_IK_UnstimVSTreg_WT_Unstim	ENSMUST00000122013+Gm12608-001	ENSMUST00000122013	Gm12608-001
OCR_74204	chr3	115902596	115903665	1.04958	3.70046	47.5181	3.75e-09	4.06e-07	Treg_IK_UnstimVSTreg_WT_Unstim	ENSMUST00000170081+Gm17730-201	ENSMUST00000170081	Gm17730-201
OCR_46730	chr16	64868491	64868752	1.04951	1.92208	15.254	0.000240395	0.00207017	Treg_IK_UnstimVSTreg_WT_Unstim	ENSMUST00000136532+Cggbp1-002	ENSMUST00000136532	Cggbp1-002
OCR_54412	chr18	32711636	32712226	1.04932	2.39007	15.7652	0.000274467	0.00229249	Treg_IK_UnstimVSTreg_WT_Unstim	ENSMUST00000174000+Gypc-002	ENSMUST00000174000	Gypc-002
OCR_117765	chrX	98929103	98929764	1.04925	2.5233	21.554	1.91e-05	0.000301375	Treg_IK_UnstimVSTreg_WT_Unstim	ENSMUST00000056614+Cxcr3-001	ENSMUST00000056614	Cxcr3-001
OCR_12511	chr10	75104570	75104916	1.04915	2.6611	25.5643	4.28e-06	9.72e-05	Treg_IK_UnstimVSTreg_WT_Unstim	ENSMUST00000077610+Susd2-201	ENSMUST00000077610	Susd2-201
OCR_44825	chr16	24861150	24861835	1.04904	1.95182	16.3095	0.000154607	0.00146847	Treg_IK_UnstimVSTreg_WT_Unstim	ENSMUST00000104414+SNORA17.232-201	ENSMUST00000104414	SNORA17.232-201
OCR_89570	chr5	129084967	129085929	1.04844	3.4766	36.5163	1.03e-07	5.35e-06	Treg_IK_UnstimVSTreg_WT_Unstim	ENSMUST00000140028+5930412G12Rik-004	ENSMUST00000140028	5930412G12Rik-004
OCR_87535	chr5	96650344	96650701	1.04832	2.16491	18.8327	5.54e-05	0.000676015	Treg_IK_UnstimVSTreg_WT_Unstim	ENSMUST00000121477+Mrpl1-002	ENSMUST00000121477	Mrpl1-002
OCR_94489	chr6	86497812	86498443	1.04829	4.43772	63.814	5.02e-11	1.16e-08	Treg_IK_UnstimVSTreg_WT_Unstim	ENSMUST00000128779+1600020E01Rik-202	ENSMUST00000128779	1600020E01Rik-202
OCR_53682	chr18	12289879	12290118	1.04806	2.23553	18.867	5.47e-05	0.000667912	Treg_IK_UnstimVSTreg_WT_Unstim	ENSMUST00000025270+Riok3-201	ENSMUST00000025270	Riok3-201
OCR_46098	chr16	49965444	49966104	1.04795	3.70113	37.062	1.19e-07	5.98e-06	Treg_IK_UnstimVSTreg_WT_Unstim	ENSMUST00000113709+Cd47-202	ENSMUST00000113709	Cd47-202
OCR_90200	chr5	139776347	139776810	1.0475	2.72922	26.9159	2.63e-06	6.71e-05	Treg_IK_UnstimVSTreg_WT_Unstim	ENSMUST00000075389+Adap1-201	ENSMUST00000075389	Adap1-201
OCR_55721	chr18	60432370	60433754	1.04719	3.86046	44.9264	7.92e-09	7.23e-07	Treg_IK_UnstimVSTreg_WT_Unstim	ENSMUST00000090260+Gm4841-201	ENSMUST00000090260	Gm4841-201
OCR_10732	chr10	39153791	39154034	1.04717	2.40421	24.9804	5.3e-06	0.000114329	Treg_IK_UnstimVSTreg_WT_Unstim	ENSMUST00000147879+Gm6963-001	ENSMUST00000147879	Gm6963-001
OCR_86397	chr5	64862989	64864245	1.04697	4.27252	63.449	5.5e-11	1.25e-08	Treg_IK_UnstimVSTreg_WT_Unstim	ENSMUST00000136099+Tbc1d1-008	ENSMUST00000136099	Tbc1d1-008
OCR_100685	chr7	63123519	63124939	1.04684	3.40447	36.014	1.21e-07	6.07e-06	Treg_IK_UnstimVSTreg_WT_Unstim	ENSMUST00000163845+Cyfip1-006	ENSMUST00000163845	Cyfip1-006
OCR_45530	chr16	38359779	38360267	1.04682	2.40708	19.0238	5.14e-05	0.000637456	Treg_IK_UnstimVSTreg_WT_Unstim	ENSMUST00000023494+Popdc2-003	ENSMUST00000023494	Popdc2-003
OCR_25224	chr12	86391802	86392780	1.04644	3.41842	31.0009	9.27e-07	3.01e-05	Treg_IK_UnstimVSTreg_WT_Unstim	ENSMUST00000165803+Ylpm1-007	ENSMUST00000165803	Ylpm1-007
OCR_46120	chr16	50289453	50290313	1.04606	3.24034	33.8812	2.42e-07	1.06e-05	Treg_IK_UnstimVSTreg_WT_Unstim	ENSMUST00000114488+Bbx-006	ENSMUST00000114488	Bbx-006
OCR_78972	chr4	57927079	57927497	1.0458	2.56033	24.5649	6.17e-06	0.000128225	Treg_IK_UnstimVSTreg_WT_Unstim	ENSMUST00000063816+D630039A03Rik-001	ENSMUST00000063816	D630039A03Rik-001
[truncated: 686 more rows]
