# Supplementary material for: Foxp3 depends on Ikaros for control of regulatory T cell gene expression and function
Source: eLife. 2024 Apr 24;12:RP91392. doi: 10.7554/eLife.91392 (PMC11042806; doi:10.7554/eLife.91392)
Supplement: Supplementary file 5. [file elife-91392-supp5.xlsx]

## Sheet: H3K27ac_IK_Treg.vs.WT_Treg.DE_e
Differential analysis of H3K27 acetylation
chr	start	end	id	logFC	logCPM	F	PValue	FDR
chr10	94574360	94577126	H3K27ac_28997	3.2249	4.17664	357.388	7.18264e-17	1.53321e-12
chr11	70406734	70412709	H3K27ac_31686	2.06638	6.36513	283.586	1.21382e-15	8.7791e-12
chr15	99641664	99644117	H3K27ac_42014	2.8012	3.62159	283.204	1.23383e-15	8.7791e-12
chr2	32278039	32281471	H3K27ac_4629	1.83098	5.85005	258.715	3.67509e-15	1.12069e-11
chr2	84489717	84491318	H3K27ac_5633	3.5866	3.16248	261.21	3.27445e-15	1.12069e-11
chr11	5906127	5909930	H3K27ac_30123	-4.67129	4.47723	378.518	2.23421e-15	1.12069e-11
chr15	99647836	99650681	H3K27ac_42015	2.94387	3.25713	261.76	3.19265e-15	1.12069e-11
chr5	113565349	113567870	H3K27ac_14849	2.22183	4.54324	224.816	1.96653e-14	5.10492e-11
chr5	114422369	114426360	H3K27ac_14869	2.16002	5.14331	223.11	2.15236e-14	5.10492e-11
chr8	97325352	97329293	H3K27ac_23203	2.29981	4.67426	220.068	2.53243e-14	5.40572e-11
chr15	66946556	66953976	H3K27ac_41098	2.08952	5.00832	215.703	3.20931e-14	6.22781e-11
chr10	80760007	80764287	H3K27ac_28647	1.65451	6.83879	213.514	3.62006e-14	6.43948e-11
chr5	54338228	54340475	H3K27ac_13728	2.93019	3.08572	206.177	5.4645e-14	7.90772e-11
chr5	113547342	113550112	H3K27ac_14846	2.53456	3.63609	204.755	5.92727e-14	7.90772e-11
chr8	91173042	91176679	H3K27ac_23121	1.81441	5.43162	207.551	5.05379e-14	7.90772e-11
chr9	57788641	57792353	H3K27ac_25151	3.05052	4.3492	244.634	5.58205e-14	7.90772e-11
chr10	94578106	94583290	H3K27ac_28998	2.82359	4.82059	248.259	6.9527e-14	8.73014e-11
chr6	113591919	113595957	H3K27ac_17925	1.88524	4.76017	199.126	8.21927e-14	9.31545e-11
chr15	66721990	66726195	H3K27ac_41077	3.02093	5.57694	276.776	8.29165e-14	9.31545e-11
chr2	35270482	35273399	H3K27ac_4774	2.03792	4.10431	197.447	9.07577e-14	9.68657e-11
chr5	123616548	123622770	H3K27ac_15266	-2.00793	6.56044	198.278	1.01611e-13	1.03286e-10
chr19	10915865	10918508	H3K27ac_48070	1.81343	5.2684	193.615	1.14113e-13	1.10721e-10
chr1	137559604	137560818	H3K27ac_2254	2.68416	2.57921	192.631	1.21106e-13	1.12396e-10
chr11	86719882	86723311	H3K27ac_32322	2.22013	4.34085	190.69	1.36275e-13	1.21205e-10
chr11	5398666	5404018	H3K27ac_30094	2.07803	4.75266	188.988	1.51279e-13	1.29168e-10
chr3	51905355	51908179	H3K27ac_8076	1.67633	6.68599	186.168	1.80177e-13	1.47925e-10
chr16	29843944	29849352	H3K27ac_42681	2.22807	3.98452	184.882	1.9528e-13	1.54387e-10
chr6	48790023	48792187	H3K27ac_16705	2.26101	3.81824	180.773	2.53395e-13	1.93177e-10
chr4	45596569	45600340	H3K27ac_10921	2.41695	3.07017	173.731	4.00943e-13	2.88803e-10
chr9	57788013	57788554	H3K27ac_25150	2.49927	3.43844	173.547	4.05889e-13	2.88803e-10
chr18	32711116	32712822	H3K27ac_46628	2.49534	2.5615	170.608	4.94007e-13	3.40164e-10
chr5	23893799	23895962	H3K27ac_13275	1.86656	4.61703	169.712	5.24826e-13	3.50092e-10
chr15	59404477	59406682	H3K27ac_40817	2.38097	3.584	167.68	6.02614e-13	3.898e-10
chr11	69230703	69233822	H3K27ac_31604	1.51998	5.72354	165.15	7.17263e-13	4.50315e-10
chr8	108714788	108718558	H3K27ac_23331	2.60429	3.11387	164.697	7.40191e-13	4.51432e-10
chr6	121003053	121008839	H3K27ac_18148	1.64999	5.08052	162.961	8.35481e-13	4.95394e-10
chr14	78754952	78757780	H3K27ac_39726	2.26106	3.52101	161.096	9.52844e-13	5.35248e-10
chr14	119055811	119058253	H3K27ac_39959	2.18514	3.50033	161.195	9.46158e-13	5.35248e-10
chr19	53631041	53632383	H3K27ac_49012	2.16991	2.97708	158.674	1.13232e-12	6.19759e-10
chr17	26712870	26714135	H3K27ac_44532	2.35106	2.88702	156.743	1.30155e-12	6.94572e-10
chr2	181144100	181147106	H3K27ac_7573	-1.56491	4.99642	155.88	1.38583e-12	7.21511e-10
chr2	84683832	84685198	H3K27ac_5647	3.53693	2.55232	171.877	1.44423e-12	7.34013e-10
chr7	111367199	111368045	H3K27ac_20902	2.62972	2.30473	151.808	1.87067e-12	9.28633e-10
chr12	33837722	33838723	H3K27ac_34383	2.6114	2.21642	150.452	2.07039e-12	1.00442e-09
chr9	70688263	70691748	H3K27ac_25660	2.6884	3.43651	159.33	2.31565e-12	1.09844e-09
chr12	113830897	113834151	H3K27ac_35920	1.79588	5.02124	149.366	2.44415e-12	1.13419e-09
chr16	33793595	33798176	H3K27ac_42897	2.18356	4.48989	159.701	2.73362e-12	1.24153e-09
chr5	113536429	113538533	H3K27ac_14842	2.11438	3.59925	145.305	3.06503e-12	1.36304e-09
chr5	113561251	113562275	H3K27ac_14848	2.40846	2.05076	144.93	3.15524e-12	1.37453e-09
chr8	129394315	129401512	H3K27ac_23938	1.5658	6.28138	144.636	3.22809e-12	1.37814e-09
chr5	77812176	77816892	H3K27ac_14185	2.00494	3.70436	143.888	3.42159e-12	1.40456e-09
chr10	94674464	94677377	H3K27ac_29007	2.34044	4.10114	156.444	3.41196e-12	1.40456e-09
chr2	145021622	145024648	H3K27ac_6631	-2.13742	4.25036	145.761	3.48949e-12	1.40541e-09
chr7	135671120	135673624	H3K27ac_21540	2.10183	3.57383	142.68	3.76102e-12	1.48672e-09
chr4	129173243	129174893	H3K27ac_12101	2.02549	3.37057	141.806	4.02918e-12	1.53869e-09
chr6	113590250	113591779	H3K27ac_17924	2.4486	2.77175	141.383	4.16601e-12	1.53869e-09
chr9	69012111	69014619	H3K27ac_25559	1.79844	4.0182	141.547	4.11251e-12	1.53869e-09
chr11	19736757	19738419	H3K27ac_30269	-4.06132	2.48353	160.813	4.2213e-12	1.53869e-09
chr17	29602978	29605599	H3K27ac_44725	1.87157	4.29019	141.123	4.25291e-12	1.53869e-09
chr2	84680564	84681320	H3K27ac_5645	2.36409	2.74252	140.076	4.62232e-12	1.63124e-09
chr5	23892910	23893739	H3K27ac_13274	2.08147	3.28925	139.97	4.66157e-12	1.63124e-09
chr4	129185029	129186353	H3K27ac_12103	2.37594	2.40533	139.432	4.8665e-12	1.67549e-09
chr2	167159826	167164535	H3K27ac_7264	1.6446	4.62299	139.176	4.9674e-12	1.68308e-09
chr9	32707294	32710333	H3K27ac_24489	-2.25258	3.6986	138.76	5.13632e-12	1.68677e-09
chr15	66957327	66961752	H3K27ac_41100	1.7793	5.21503	144.601	5.07114e-12	1.68677e-09
chr10	75104954	75106722	H3K27ac_28432	1.73569	4.07957	135.598	6.64048e-12	2.14769e-09
chr1	132637259	132638345	H3K27ac_2064	3.11002	2.23682	140.377	7.00621e-12	2.19933e-09
chr11	88310418	88312727	H3K27ac_32428	2.23527	2.81523	135.116	6.90922e-12	2.19933e-09
chr2	28387463	28388813	H3K27ac_4402	1.80982	3.56184	134.319	7.37836e-12	2.28259e-09
chr2	112149058	112150143	H3K27ac_5960	2.34011	2.23891	132.002	8.94928e-12	2.72902e-09
chr13	52098443	52100307	H3K27ac_37156	2.24048	2.82145	130.924	9.79944e-12	2.94618e-09
chr4	133909238	133912873	H3K27ac_12414	1.76742	4.60729	130.378	1.08067e-11	3.20388e-09
chr11	97106968	97108956	H3K27ac_32674	2.88759	2.8527	139.786	1.1334e-11	3.26941e-09
chr17	29330226	29331150	H3K27ac_44701	2.49792	2.34298	129.304	1.12449e-11	3.26941e-09
chr4	133916797	133919560	H3K27ac_12415	1.58716	4.87013	127.601	1.30151e-11	3.63034e-09
chr5	23889413	23891974	H3K27ac_13273	1.55428	5.51927	127.53	1.30955e-11	3.63034e-09
chr18	37983902	37985664	H3K27ac_46769	1.8657	3.3753	127.73	1.2872e-11	3.63034e-09
chr5	115636961	115638566	H3K27ac_14950	1.72573	4.05044	126.83	1.39143e-11	3.80788e-09
chr8	126329371	126331885	H3K27ac_23817	1.72433	4.61563	126.291	1.45815e-11	3.84268e-09
chr16	24192261	24194447	H3K27ac_42635	1.95807	3.12901	126.408	1.44332e-11	3.84268e-09
chr19	46596429	46599572	H3K27ac_48887	1.54724	4.47864	126.384	1.44635e-11	3.84268e-09
chr19	9153402	9155460	H3K27ac_48004	2.17767	2.80835	125.911	1.50718e-11	3.92345e-09
chr11	119541578	119547543	H3K27ac_33816	1.73797	4.31677	125.373	1.57986e-11	4.06309e-09
chr5	77785812	77787923	H3K27ac_14179	2.09177	2.94379	125.03	1.6281e-11	4.13731e-09
chr2	20889657	20891747	H3K27ac_4218	1.29813	5.90422	124.16	1.75776e-11	4.33226e-09
chr7	146433608	146434814	H3K27ac_21696	1.41597	4.93777	124.125	1.76313e-11	4.33226e-09
chr9	24988692	24991970	H3K27ac_24388	-1.69214	4.54507	124.109	1.7657e-11	4.33226e-09
chr11	88335573	88339678	H3K27ac_32432	1.71028	4.36377	123.098	1.93131e-11	4.68475e-09
chr4	132514720	132516022	H3K27ac_12276	2.68463	2.13845	122.811	2.00535e-11	4.70397e-09
chr11	98307321	98312718	H3K27ac_32737	1.49002	5.76213	122.795	1.98403e-11	4.70397e-09
chr18	82676949	82683489	H3K27ac_47646	1.21167	6.16388	122.876	1.96981e-11	4.70397e-09
chr7	148232441	148235360	H3K27ac_21787	1.65248	4.75405	122.382	2.05859e-11	4.76114e-09
chr11	94134850	94139021	H3K27ac_32538	1.68254	5.30065	127.654	2.07433e-11	4.76114e-09
chr4	8951894	8956103	H3K27ac_10421	1.83473	5.06978	132.326	2.28934e-11	4.93882e-09
chr6	125209499	125212103	H3K27ac_18290	-1.75252	4.32369	121.192	2.29056e-11	4.93882e-09
chr8	97544013	97545541	H3K27ac_23215	2.04173	3.22038	121.303	2.26775e-11	4.93882e-09
chr11	78905847	78908744	H3K27ac_32041	1.96225	4.04771	124.345	2.20139e-11	4.93882e-09
chr15	12359311	12361290	H3K27ac_40325	2.68959	2.47953	125.705	2.21225e-11	4.93882e-09
chr17	64970392	64972313	H3K27ac_45766	2.08691	2.86823	121.521	2.22381e-11	4.93882e-09
chr14	78704756	78707983	H3K27ac_39718	1.37624	5.85739	121.018	2.32677e-11	4.96672e-09
chr14	32480676	32483970	H3K27ac_38693	1.23113	5.30229	120.686	2.39775e-11	5.06756e-09
chr4	40765429	40773509	H3K27ac_10797	1.28264	6.00435	120.045	2.54106e-11	5.31779e-09
chr7	87519886	87520368	H3K27ac_20339	2.50458	2.42703	120.184	2.58518e-11	5.32153e-09
chr18	68223601	68226662	H3K27ac_47294	1.75021	3.88466	119.824	2.59271e-11	5.32153e-09
chr2	49599018	49601296	H3K27ac_4917	2.3337	3.54209	128.455	2.71004e-11	5.4574e-09
chr7	146468627	146471060	H3K27ac_21700	2.56942	2.65451	122.823	2.70564e-11	5.4574e-09
chr5	114439521	114442224	H3K27ac_14874	1.59184	3.80951	118.607	2.89758e-11	5.78053e-09
chr6	134154799	134159010	H3K27ac_18495	2.13404	4.29099	132.77	3.05532e-11	5.98338e-09
chr12	36261995	36264642	H3K27ac_34443	1.74114	3.88808	118.09	3.03835e-11	5.98338e-09
chr16	11008094	11009318	H3K27ac_42344	3.03423	2.26693	128.513	3.10164e-11	6.01237e-09
chr17	21703394	21704402	H3K27ac_44375	1.4923	4.35931	117.78	3.12646e-11	6.01237e-09
chr11	51729210	51730809	H3K27ac_30982	2.4121	3.75877	132.797	3.15564e-11	6.01432e-09
chr9	107884319	107886228	H3K27ac_26292	2.05664	3.62824	117.488	3.21213e-11	6.06781e-09
chr2	168341046	168343736	H3K27ac_7343	1.98647	4.06173	122.401	3.24459e-11	6.07535e-09
chr11	75944026	75945426	H3K27ac_31880	2.40093	2.74077	116.588	3.4917e-11	6.48121e-09
chr16	10757348	10760576	H3K27ac_42323	2.3425	3.89556	133.039	3.5992e-11	6.62314e-09
chr7	87918578	87929099	H3K27ac_20384	1.29441	6.5333	115.727	3.78395e-11	6.8451e-09
chr15	103195900	103196860	H3K27ac_42181	1.8533	3.40368	115.791	3.76132e-11	6.8451e-09
chr15	12367700	12369401	H3K27ac_40327	2.68316	2.04003	115.546	3.86895e-11	6.94005e-09
chr1	40415149	40418849	H3K27ac_418	3.37825	4.26362	185.537	4.11535e-11	7.17878e-09
chr12	17697612	17699642	H3K27ac_34173	1.27822	5.43907	114.872	4.10004e-11	7.17878e-09
chr15	66968293	66987225	H3K27ac_41103	1.42494	6.94632	114.825	4.1184e-11	7.17878e-09
chr19	29536048	29545449	H3K27ac_48450	1.29585	5.88787	114.778	4.13656e-11	7.17878e-09
chr8	97329359	97332268	H3K27ac_23204	2.64935	3.24618	129.229	4.28484e-11	7.37614e-09
chr6	124867422	124868623	H3K27ac_18263	1.26842	5.22017	114.204	4.36681e-11	7.45711e-09
chr2	35299123	35306808	H3K27ac_4781	1.50295	5.84498	114.916	4.65369e-11	7.88394e-09
chr11	19861884	19866127	H3K27ac_30276	1.38539	4.82446	112.722	5.02852e-11	8.45187e-09
chr7	133496565	133503839	H3K27ac_21368	1.30539	5.85996	112.463	5.15436e-11	8.59571e-09
chr7	26564238	26573966	H3K27ac_19342	1.40986	7.28202	111.841	5.47174e-11	9.05425e-09
chr2	127153709	127155376	H3K27ac_6318	1.89026	3.70101	111.337	5.74419e-11	9.43197e-09
chr2	152732249	152733280	H3K27ac_6770	1.99249	2.48367	111.021	5.92283e-11	9.50591e-09
chr5	139863165	139866409	H3K27ac_15647	1.45912	5.37988	111.1	5.87783e-11	9.50591e-09
chr9	83464628	83468959	H3K27ac_25883	-1.77562	3.62191	111.039	5.91251e-11	9.50591e-09
chr11	4207527	4210428	H3K27ac_29984	2.17944	4.07168	125.817	6.11166e-11	9.73578e-09
chr14	67462991	67466789	H3K27ac_39412	1.6817	4.30867	110.534	6.20946e-11	9.8183e-09
chr7	82965249	82968876	H3K27ac_20222	1.40246	5.40386	110.404	6.28851e-11	9.87019e-09
chr2	35261284	35270131	H3K27ac_4773	1.20115	5.92841	110.065	6.49954e-11	1.00536e-08
chr10	94583710	94587115	H3K27ac_28999	3.23923	5.11258	201.556	6.49338e-11	1.00536e-08
chr3	95453341	95457254	H3K27ac_8933	1.40016	5.59958	109.708	6.72998e-11	1.03351e-08
chr8	11779117	11780518	H3K27ac_21992	2.16973	2.37998	109.599	6.8023e-11	1.03716e-08
chr7	139507321	139509542	H3K27ac_21598	1.1535	5.98324	109.422	6.92146e-11	1.04784e-08
chr7	16596456	16599523	H3K27ac_19102	1.77608	4.08076	109.21	7.06671e-11	1.05169e-08
chr10	94761441	94765760	H3K27ac_29018	2.53099	4.83921	156.615	7.03642e-11	1.05169e-08
chr16	38402169	38408407	H3K27ac_42998	1.42897	5.24229	109.169	7.09472e-11	1.05169e-08
chr9	63520081	63523868	H3K27ac_25326	1.80518	3.99517	109.249	7.36356e-11	1.08402e-08
chr3	51575441	51577822	H3K27ac_8055	2.58522	2.92595	117.685	7.80917e-11	1.13398e-08
chr11	113068889	113070910	H3K27ac_33480	1.47615	4.65973	108.214	7.79539e-11	1.13398e-08
chr14	55051385	55053121	H3K27ac_39017	1.91751	3.5353	107.726	8.18152e-11	1.18002e-08
chr16	38370124	38378096	H3K27ac_42990	1.84067	5.93596	129.622	8.40223e-11	1.20372e-08
chr17	80547018	80548721	H3K27ac_46060	1.70886	3.26362	106.793	8.97835e-11	1.27768e-08
chr12	17445474	17448495	H3K27ac_34152	1.5459	3.85711	106.715	9.04863e-11	1.27915e-08
chr8	90816853	90824910	H3K27ac_23113	1.27836	6.54844	106.613	9.14154e-11	1.28378e-08
chr7	73341360	73343146	H3K27ac_19945	1.63263	4.13277	106.465	9.2776e-11	1.29438e-08
chr3	102541778	102543163	H3K27ac_9166	1.92662	2.85469	106.306	9.42628e-11	1.30658e-08
chr9	57837339	57839461	H3K27ac_25155	2.22146	2.89065	105.991	9.72976e-11	1.33994e-08
chr9	70695107	70697069	H3K27ac_25661	2.28127	3.09416	109.563	9.8675e-11	1.3416e-08
chr11	87538365	87540746	H3K27ac_32381	1.48138	4.16038	105.896	9.8232e-11	1.3416e-08
chr12	86970009	86971483	H3K27ac_35345	1.82277	3.25975	105.612	1.01086e-10	1.36569e-08
chr4	132312446	132314352	H3K27ac_12255	1.60822	3.8833	105.516	1.02063e-10	1.36884e-08
chr11	69284808	69286770	H3K27ac_31605	1.52309	3.98496	105.464	1.02602e-10	1.36884e-08
chr19	53628606	53630749	H3K27ac_49011	1.97237	3.25339	104.579	1.12232e-10	1.48801e-08
chr13	30848899	30855076	H3K27ac_36525	1.37037	5.54	103.939	1.19788e-10	1.57839e-08
chr8	129183038	129191925	H3K27ac_23907	1.29669	7.8144	103.404	1.26537e-10	1.65666e-08
chr17	50281016	50283299	H3K27ac_45459	1.82984	3.21458	103.347	1.27281e-10	1.65666e-08
chr2	32731657	32733777	H3K27ac_4671	1.40187	4.39328	103.086	1.30745e-10	1.69144e-08
chr10	120133634	120135140	H3K27ac_29668	1.94396	2.96439	102.864	1.3376e-10	1.72002e-08
chr11	86806011	86809361	H3K27ac_32336	1.18228	6.49343	102.3	1.4179e-10	1.80781e-08
chr15	102207851	102209282	H3K27ac_42155	1.90022	3.35431	102.266	1.4228e-10	1.80781e-08
chr7	28262963	28264057	H3K27ac_19357	2.07496	2.6322	102.069	1.4521e-10	1.83412e-08
chr7	134261144	134263139	H3K27ac_21437	1.98245	3.02236	101.966	1.4678e-10	1.84304e-08
chr2	18862294	18866678	H3K27ac_4187	1.39682	4.94365	101.884	1.48036e-10	1.84794e-08
chr11	70002938	70003614	H3K27ac_31644	1.85266	2.53893	101.815	1.49087e-10	1.84848e-08
chr15	66934091	66936300	H3K27ac_41096	2.09362	2.93049	101.769	1.49811e-10	1.84848e-08
chr14	8919735	8922773	H3K27ac_38296	1.85284	3.17624	101.543	1.53376e-10	1.87725e-08
chr15	101091353	101092272	H3K27ac_42120	2.04102	2.58284	101.51	1.53902e-10	1.87725e-08
chr9	45853099	45855658	H3K27ac_24845	1.46564	4.45731	101.213	1.5874e-10	1.91439e-08
chr17	87107907	87111025	H3K27ac_46292	-1.3365	4.67032	101.226	1.58526e-10	1.91439e-08
chr2	128245251	128247083	H3K27ac_6391	2.04494	2.38617	100.879	1.64378e-10	1.97125e-08
chr14	62435877	62438445	H3K27ac_39256	1.68526	3.79485	100.421	1.72459e-10	2.0566e-08
chr16	10812742	10815939	H3K27ac_42331	1.59362	3.99545	99.9441	1.81341e-10	2.1505e-08
chr6	82702834	82704600	H3K27ac_17175	2.04299	2.71201	99.8514	1.83123e-10	2.15964e-08
chr1	158391757	158394994	H3K27ac_2695	1.94654	3.48942	100.812	1.9269e-10	2.25998e-08
chr2	93310011	93311612	H3K27ac_5786	1.52664	3.69454	98.4864	2.11658e-10	2.44219e-08
chr12	87386111	87389488	H3K27ac_35371	-1.47366	4.9069	98.5174	2.1096e-10	2.44219e-08
chr16	32671283	32673800	H3K27ac_42827	1.44664	4.45322	98.4909	2.11556e-10	2.44219e-08
chr19	36629160	36629790	H3K27ac_48656	1.58844	4.02691	98.3392	2.1501e-10	2.46752e-08
chr1	140503069	140506808	H3K27ac_2395	2.18488	4.83288	129.932	2.1915e-10	2.50159e-08
chr6	49157649	49159244	H3K27ac_16723	1.96292	2.46337	97.9298	2.24636e-10	2.52373e-08
chr10	21407349	21408800	H3K27ac_27400	2.56776	2.54933	106.639	2.23313e-10	2.52373e-08
chr18	32701706	32703825	H3K27ac_46627	1.7258	3.38299	97.9499	2.24153e-10	2.52373e-08
chr5	113556007	113557352	H3K27ac_14847	1.92014	2.13434	97.6299	2.31982e-10	2.57879e-08
chr11	97139742	97141961	H3K27ac_32679	1.2855	6.01081	97.6326	2.31916e-10	2.57879e-08
chr17	7012086	7014009	H3K27ac_44161	2.24339	2.24807	97.5827	2.33162e-10	2.57879e-08
chr7	16826859	16828152	H3K27ac_19126	2.60248	2.24632	103.902	2.35989e-10	2.59661e-08
chr14	26261083	26262623	H3K27ac_38495	2.00299	2.44041	96.7428	2.55265e-10	2.7943e-08
chr6	121059635	121060572	H3K27ac_18156	1.217	5.31252	96.3614	2.66039e-10	2.89738e-08
chr2	168356849	168359226	H3K27ac_7348	1.43236	5.30242	98.8714	2.67516e-10	2.89867e-08
chr11	78815530	78818003	H3K27ac_32029	1.90756	3.02647	96.1781	2.71389e-10	2.92579e-08
chr14	48159878	48162091	H3K27ac_38848	-1.43667	3.93287	96.0555	2.75034e-10	2.95018e-08
chr3	51908338	51908927	H3K27ac_8077	1.60749	3.95206	95.7517	2.84288e-10	3.01911e-08
chr6	37368868	37370025	H3K27ac_16400	1.75045	2.22126	95.786	2.83227e-10	3.01911e-08
chr2	25352844	25354069	H3K27ac_4315	1.83929	2.97748	95.4467	2.9392e-10	3.0755e-08
chr12	86972448	86973491	H3K27ac_35346	2.04242	2.75614	95.4886	2.92575e-10	3.0755e-08
chr18	24274225	24275901	H3K27ac_46584	2.29403	2.82384	99.9624	2.93082e-10	3.0755e-08
chr5	104449588	104452001	H3K27ac_14504	1.4616	4.02163	95.1606	3.03274e-10	3.14256e-08
chr7	87545057	87551236	H3K27ac_20343	1.21922	7.47481	95.1778	3.02701e-10	3.14256e-08
chr10	94759159	94761169	H3K27ac_29017	2.64573	2.57254	105.97	3.08817e-10	3.18455e-08
chr17	80463045	80463896	H3K27ac_46052	2.01193	2.64887	94.9316	3.1099e-10	3.19154e-08
chr1	140406524	140409404	H3K27ac_2366	1.77579	3.61976	94.7785	3.16268e-10	3.23017e-08
chr14	70740185	70742499	H3K27ac_39474	1.58253	3.87518	94.7174	3.184e-10	3.23646e-08
chr15	82182127	82183205	H3K27ac_41625	1.99316	2.46177	94.2321	3.35903e-10	3.39819e-08
chr4	133441496	133442868	H3K27ac_12380	1.885	3.00774	93.9228	3.47597e-10	3.47886e-08
chr8	125088411	125089183	H3K27ac_23738	1.89747	2.59616	93.8925	3.48766e-10	3.47886e-08
chr15	36382714	36387187	H3K27ac_40499	1.24252	5.24126	93.9092	3.48122e-10	3.47886e-08
chr8	109777103	109779675	H3K27ac_23368	1.40502	3.99751	93.6146	3.59685e-10	3.57109e-08
chr16	29838767	29840190	H3K27ac_42678	1.69833	2.74142	93.4372	3.66847e-10	3.62534e-08
chr11	95239571	95241745	H3K27ac_32586	1.52161	3.93902	93.0623	3.82493e-10	3.76253e-08
chr2	90405162	90407862	H3K27ac_5678	1.70934	3.22675	92.8809	3.90321e-10	3.80447e-08
chr3	30955115	30956512	H3K27ac_7822	1.22972	4.4189	92.9042	3.89305e-10	3.80447e-08
chr17	87701054	87702493	H3K27ac_46330	2.04491	2.97122	92.9324	4.03769e-10	3.91766e-08
chr9	70698683	70701838	H3K27ac_25662	1.75361	3.34415	92.226	4.20046e-10	4.03887e-08
chr12	113825576	113828437	H3K27ac_35919	1.1098	6.12442	92.228	4.19949e-10	4.03887e-08
chr14	78751291	78753987	H3K27ac_39725	1.72967	3.65057	92.1517	4.23569e-10	4.05448e-08
chr5	125532570	125533783	H3K27ac_15375	1.77203	2.8682	91.8474	4.38333e-10	4.17708e-08
chr17	56091573	56093513	H3K27ac_45670	1.59256	3.68746	91.783	4.41523e-10	4.18878e-08
chr7	29647144	29653206	H3K27ac_19424	1.2839	7.51893	91.6078	4.50347e-10	4.25358e-08
chr2	151792483	151795578	H3K27ac_6717	1.44447	4.58917	91.2642	4.68196e-10	4.40269e-08
chr14	78718260	78721768	H3K27ac_39719	1.40141	4.58532	91.1817	4.72597e-10	4.42458e-08
chr11	3209107	3214857	H3K27ac_29940	1.47387	4.94867	90.8498	4.90745e-10	4.57443e-08
chr13	30839487	30843994	H3K27ac_36523	1.06816	6.47385	90.4775	5.12002e-10	4.75017e-08
chr16	33781450	33783553	H3K27ac_42894	2.21788	2.5097	92.7579	5.1405e-10	4.75017e-08
chr2	72839067	72842925	H3K27ac_5372	1.55391	5.40686	96.2904	5.21131e-10	4.79485e-08
chr13	55283550	55285090	H3K27ac_37248	1.66738	2.81759	90.1271	5.32918e-10	4.88226e-08
chr12	53604346	53606067	H3K27ac_34552	1.06815	5.40713	89.3863	5.80221e-10	5.2929e-08
chr5	122673945	122675373	H3K27ac_15160	1.8138	2.91725	89.0782	6.01209e-10	5.41377e-08
chr6	115953434	115954536	H3K27ac_18019	1.66126	3.46652	89.1502	5.9623e-10	5.41377e-08
chr10	94871087	94872939	H3K27ac_29034	2.14728	2.15034	89.0595	6.02506e-10	5.41377e-08
chr11	51762554	51764031	H3K27ac_30987	2.08425	2.52283	89.0436	6.03616e-10	5.41377e-08
chr10	94784641	94785771	H3K27ac_29022	1.88768	3.17336	88.919	6.12373e-10	5.46934e-08
chr2	120484972	120486405	H3K27ac_6146	2.12052	2.3443	88.496	6.43132e-10	5.60339e-08
chr6	94594130	94600559	H3K27ac_17505	1.19814	4.75378	88.5296	6.40624e-10	5.60339e-08
chr11	59938913	59940291	H3K27ac_31388	1.81699	2.2802	88.6588	6.31101e-10	5.60339e-08
chr14	32474052	32477541	H3K27ac_38690	1.17312	6.2724	88.5054	6.42426e-10	5.60339e-08
chr14	121756904	121762323	H3K27ac_40057	1.10632	5.34484	88.5227	6.41142e-10	5.60339e-08
chr15	36302863	36306096	H3K27ac_40484	1.11112	5.52212	88.6137	6.34405e-10	5.60339e-08
chr9	57815578	57822933	H3K27ac_25153	2.74931	6.07521	156.608	6.49185e-10	5.63313e-08
chrX	34630455	34633012	H3K27ac_49360	-1.97087	2.96162	88.2468	6.62022e-10	5.72127e-08
chr7	63097584	63098717	H3K27ac_19783	1.21597	4.77949	87.9259	6.87243e-10	5.91528e-08
chr9	62485279	62487989	H3K27ac_25294	-1.74398	3.70856	88.5929	7.29288e-10	6.25196e-08
chr6	37389739	37392262	H3K27ac_16405	1.18984	5.73005	87.2874	7.40547e-10	6.32309e-08
chr11	51635548	51638125	H3K27ac_30965	1.82246	3.19365	86.5333	8.0929e-10	6.88251e-08
chr7	125622270	125626666	H3K27ac_21180	1.98478	4.08823	101.134	8.17054e-10	6.92097e-08
chr7	87931438	87933766	H3K27ac_20388	1.41171	4.1722	86.2925	8.32663e-10	7.02531e-08
chr11	115053162	115054267	H3K27ac_33521	1.99028	3.05311	86.9172	8.85114e-10	7.43844e-08
chr1	140403440	140404972	H3K27ac_2364	1.9447	2.77049	85.737	8.89408e-10	7.44522e-08
chr2	169958378	169960157	H3K27ac_7391	1.32981	4.64893	85.6587	8.97735e-10	7.48557e-08
chr9	43847461	43850729	H3K27ac_24670	1.15464	5.70238	85.4267	9.229e-10	7.66545e-08
chr12	36218573	36219694	H3K27ac_34434	1.15064	5.07127	85.2891	9.38184e-10	7.7622e-08
chr7	73259257	73264099	H3K27ac_19923	1.90335	5.2603	111.043	9.51962e-10	7.84578e-08
chr5	151259013	151262219	H3K27ac_15986	-1.74708	4.59669	91.1319	9.87443e-10	8.1069e-08
chr17	29576638	29580378	H3K27ac_44721	2.05173	4.03179	100.353	1.06087e-09	8.6764e-08
chr16	92697719	92699016	H3K27ac_43848	1.29472	4.90829	84.0815	1.08463e-09	8.83686e-08
chr8	113448959	113451335	H3K27ac_23410	1.56529	3.50677	84.0013	1.0952e-09	8.889e-08
chr3	137630809	137636830	H3K27ac_9946	1.55455	5.36561	95.0235	1.10526e-09	8.91815e-08
chr7	86443778	86446003	H3K27ac_20282	1.23683	4.94769	83.9115	1.10714e-09	8.91815e-08
chr3	10258328	10261190	H3K27ac_7649	-1.80847	2.74506	83.8286	1.11831e-09	8.97419e-08
chr17	36994716	36996929	H3K27ac_45171	1.85519	3.24476	84.7298	1.14474e-09	9.1519e-08
chr12	78338922	78340994	H3K27ac_35025	1.21489	6.42361	83.5461	1.15726e-09	9.2175e-08
chr7	146314131	146317815	H3K27ac_21689	1.43631	4.73289	85.9377	1.17619e-09	9.30016e-08
chr10	69582120	69585119	H3K27ac_28354	2.62739	4.04511	119.39	1.17635e-09	9.30016e-08
chr1	59820278	59821802	H3K27ac_902	1.43732	5.22307	88.3748	1.21318e-09	9.52547e-08
chr7	108691434	108693722	H3K27ac_20829	1.60559	3.13965	83.154	1.21378e-09	9.52547e-08
chr3	100913458	100914417	H3K27ac_9119	1.29003	4.35195	83.0157	1.23441e-09	9.65191e-08
chr14	35175420	35177789	H3K27ac_38735	1.24864	4.86363	82.8563	1.25867e-09	9.80565e-08
chr2	153351768	153352997	H3K27ac_6813	1.52553	3.3583	82.7388	1.27687e-09	9.90296e-08
chr5	31217326	31218865	H3K27ac_13370	1.66954	3.15281	82.716	1.28044e-09	9.90296e-08
chr19	43993360	43996874	H3K27ac_48807	1.30581	4.57306	82.645	1.2916e-09	9.95323e-08
chr12	81160379	81163176	H3K27ac_35147	1.5884	3.57906	82.5522	1.30636e-09	1.00308e-07
chr4	136018143	136018818	H3K27ac_12537	1.40242	3.99538	82.4579	1.32154e-09	1.0111e-07
chr12	17392562	17395750	H3K27ac_34135	1.46611	3.81134	82.2973	1.34784e-09	1.02754e-07
chr1	129259571	129261536	H3K27ac_1947	1.96192	2.39238	82.2635	1.35345e-09	1.02814e-07
chr7	133741124	133743008	H3K27ac_21383	2.29081	3.00778	91.6933	1.43751e-09	1.08813e-07
chr4	154608694	154609923	H3K27ac_12982	1.60021	3.4297	81.6125	1.46648e-09	1.10613e-07
chr11	115640229	115641031	H3K27ac_33607	2.04266	1.97797	81.3225	1.52007e-09	1.14251e-07
chr16	93153060	93154180	H3K27ac_43883	2.18509	1.81049	81.1799	1.54718e-09	1.15881e-07
chr6	121024127	121025472	H3K27ac_18154	2.11662	1.92361	81.1337	1.55606e-09	1.16139e-07
chr11	97010652	97011946	H3K27ac_32669	1.9191	3.46882	85.8609	1.6067e-09	1.19501e-07
chr2	84776664	84780260	H3K27ac_5648	1.35991	5.13493	83.7858	1.6496e-09	1.22265e-07
chr8	60067880	60069418	H3K27ac_22507	1.65667	2.29237	80.6245	1.65786e-09	1.22452e-07
chr2	28377007	28378142	H3K27ac_4399	1.80681	2.74814	80.548	1.67376e-09	1.22777e-07
chr12	17782516	17784849	H3K27ac_34188	2.00669	2.42243	80.5543	1.67244e-09	1.22777e-07
chr11	4166465	4168692	H3K27ac_29978	1.10687	5.19023	80.4202	1.70069e-09	1.24325e-07
chr11	4746271	4747813	H3K27ac_30050	1.57999	2.95054	80.1659	1.75568e-09	1.27907e-07
chr2	173207160	173208791	H3K27ac_7461	1.75352	2.81219	80.1012	1.76997e-09	1.2851e-07
chr11	81992533	81994525	H3K27ac_32140	1.67725	2.51106	79.8886	1.81781e-09	1.31536e-07
chr4	137429909	137432521	H3K27ac_12568	1.272	4.84055	79.7238	1.85588e-09	1.33836e-07
chr2	93278382	93282297	H3K27ac_5783	1.4496	4.81593	84.3554	1.86274e-09	1.33879e-07
chr16	33696623	33698401	H3K27ac_42877	1.80481	2.96751	79.4953	1.91006e-09	1.36819e-07
chr4	133376259	133377251	H3K27ac_12368	2.0101	1.83479	79.3056	1.95634e-09	1.39666e-07
chr4	154955752	154957418	H3K27ac_13006	1.37021	3.46782	79.1464	1.9961e-09	1.42029e-07
chr11	115086420	115093964	H3K27ac_33524	1.23703	6.21976	79.0096	2.03097e-09	1.4403e-07
chr5	76225692	76227087	H3K27ac_14129	2.07881	2.40044	80.311	2.09137e-09	1.47822e-07
chr1	132980006	132982313	H3K27ac_2092	1.76403	2.99718	78.681	2.11743e-09	1.48643e-07
chr5	149825832	149829147	H3K27ac_15952	1.08781	5.12474	78.6899	2.11503e-09	1.48643e-07
chr13	51732160	51734177	H3K27ac_37109	1.6014	3.38905	78.6571	2.12388e-09	1.48643e-07
chr10	94856756	94860463	H3K27ac_29028	1.57355	4.04832	80.6091	2.21535e-09	1.54036e-07
chr11	79423908	79428977	H3K27ac_32066	1.17313	5.92149	78.3283	2.21466e-09	1.54036e-07
chr15	77692882	77695702	H3K27ac_41318	1.5224	3.79088	78.2532	2.23597e-09	1.54964e-07
chr8	96964181	96970544	H3K27ac_23181	1.18322	4.64249	78.1645	2.26144e-09	1.56222e-07
chr11	69580636	69581193	H3K27ac_31620	1.92226	1.7783	78.002	2.3089e-09	1.58987e-07
chr6	38764516	38766762	H3K27ac_16484	1.9134	2.7475	78.5822	2.31677e-09	1.59015e-07
chr10	94766131	94767451	H3K27ac_29019	2.60463	2.18395	89.8164	2.33714e-09	1.599e-07
chr9	57873980	57876415	H3K27ac_25161	3.15171	2.62847	104.185	2.39372e-09	1.63247e-07
chr7	53020256	53022525	H3K27ac_19685	1.47619	4.17528	78.4219	2.40968e-09	1.63812e-07
chr7	29715288	29718490	H3K27ac_19426	1.52993	3.30829	77.5479	2.44729e-09	1.65841e-07
chr18	37966094	37966551	H3K27ac_46767	1.67431	2.46365	77.2492	2.54318e-09	1.71793e-07
chr6	15692719	15694240	H3K27ac_16099	1.53883	2.77552	77.1326	2.58172e-09	1.73847e-07
chr4	8942213	8943549	H3K27ac_10420	1.88971	2.17882	76.8891	2.66421e-09	1.78837e-07
chr13	102432785	102434813	H3K27ac_37878	1.52838	3.24947	76.8262	2.68596e-09	1.79732e-07
chr8	123275189	123276798	H3K27ac_23694	1.47978	3.94412	76.687	2.7348e-09	1.82428e-07
chr2	180171354	180173120	H3K27ac_7547	1.76241	3.02707	76.0586	2.96753e-09	1.93721e-07
chr3	137696424	137698228	H3K27ac_9959	1.78678	2.76046	76.1486	2.93294e-09	1.93721e-07
chr7	125634823	125635516	H3K27ac_21181	1.43114	3.73993	76.1818	2.92028e-09	1.93721e-07
chr11	117993446	117995604	H3K27ac_33733	1.84348	3.28474	78.676	2.96314e-09	1.93721e-07
chr14	26278667	26281732	H3K27ac_38498	1.11843	6.76875	76.0754	2.96107e-09	1.93721e-07
chr16	92697046	92697585	H3K27ac_43847	1.63941	3.34094	76.0584	2.96761e-09	1.93721e-07
chr17	29580544	29583059	H3K27ac_44722	1.70167	2.82703	76.0902	2.95536e-09	1.93721e-07
chr6	39067874	39068771	H3K27ac_16515	1.12728	4.79607	75.9579	3.0068e-09	1.9568e-07
chr3	96379139	96382364	H3K27ac_9007	1.10872	5.85135	75.7809	3.0771e-09	1.99647e-07
chr5	121224866	121230027	H3K27ac_15090	1.09925	5.98348	75.7486	3.09015e-09	1.99886e-07
chr19	46431436	46431836	H3K27ac_48870	1.68023	2.76063	75.633	3.13723e-09	2.02318e-07
chr8	114181964	114183629	H3K27ac_23471	2.16144	1.94759	76.8362	3.16356e-09	2.03402e-07
chr9	57801229	57805532	H3K27ac_25152	2.47169	4.60177	115.63	3.19584e-09	2.0486e-07
chr19	29496167	29498055	H3K27ac_48443	2.009	3.44588	84.5316	3.27072e-09	2.09033e-07
chr2	32752611	32754123	H3K27ac_4676	1.66261	3.06058	75.232	3.30671e-09	2.10702e-07
chr9	50361413	50363955	H3K27ac_24951	1.71736	3.81495	80.0273	3.3511e-09	2.12895e-07
chr7	148126631	148135310	H3K27ac_21755	1.23682	7.55686	75.1627	3.42863e-09	2.17174e-07
chr17	32227968	32229740	H3K27ac_44862	1.41659	4.01955	74.8104	3.49553e-09	2.20756e-07
chr12	17755852	17758210	H3K27ac_34187	1.65908	3.23131	74.7526	3.52231e-09	2.21791e-07
chr7	17490766	17494510	H3K27ac_19173	1.22986	5.30187	75.3091	3.59245e-09	2.24955e-07
chr14	26413516	26414687	H3K27ac_38515	1.68658	2.18467	74.601	3.59363e-09	2.24955e-07
chr10	20912754	20914273	H3K27ac_27352	1.93517	2.54444	74.2375	3.77095e-09	2.35365e-07
chr4	133906988	133908965	H3K27ac_12413	1.55595	3.34608	74.156	3.812e-09	2.35858e-07
chr15	12365377	12367503	H3K27ac_40326	1.85115	3.17436	75.0642	3.80788e-09	2.35858e-07
chrX	133525422	133528930	H3K27ac_49886	-1.19493	4.45487	74.1669	3.80652e-09	2.35858e-07
chr6	134101143	134103032	H3K27ac_18477	1.57374	2.7742	73.9638	3.91071e-09	2.40571e-07
chr7	148191535	148198268	H3K27ac_21778	1.92831	5.51189	103.157	3.90447e-09	2.40571e-07
chr15	81990302	81992189	H3K27ac_41614	1.82476	2.59084	73.8145	3.9893e-09	2.43999e-07
chr19	5805679	5807335	H3K27ac_47869	1.32383	4.22051	73.8356	3.97812e-09	2.43999e-07
chr10	20915430	20917341	H3K27ac_27353	1.4697	3.60709	73.7475	4.02512e-09	2.45486e-07
chr16	43590710	43592603	H3K27ac_43049	1.61566	2.52675	73.656	4.07458e-09	2.47795e-07
chr7	133481364	133484936	H3K27ac_21362	1.29432	5.64123	75.5333	4.08709e-09	2.4785e-07
chr5	123947387	123948723	H3K27ac_15275	1.65492	2.44231	73.5753	4.11874e-09	2.49061e-07
chr12	113181890	113183148	H3K27ac_35914	1.6714	2.96987	73.4456	4.19086e-09	2.52706e-07
chr6	115938887	115940264	H3K27ac_18017	1.47948	3.70969	73.3425	4.24907e-09	2.55495e-07
chr3	90250209	90251325	H3K27ac_8819	1.80074	2.22641	73.2194	4.31978e-09	2.59017e-07
chr5	101026032	101027850	H3K27ac_14421	1.77145	2.56176	73.1979	4.33227e-09	2.59038e-07
chr2	31582170	31584358	H3K27ac_4583	-1.29324	4.19772	73.1381	4.3672e-09	2.60398e-07
chr4	149779902	149781910	H3K27ac_12856	1.36767	4.43599	73.9528	4.40477e-09	2.61178e-07
chr14	26289777	26298062	H3K27ac_38501	1.04901	6.67977	73.0829	4.39967e-09	2.61178e-07
chr1	140433808	140435970	H3K27ac_2372	1.40661	3.80172	73.0191	4.43759e-09	2.62395e-07
chr11	20933030	20935123	H3K27ac_30320	1.48768	4.10134	74.163	4.46907e-09	2.63527e-07
chr19	21178872	21180003	H3K27ac_48264	1.63934	2.74863	72.8361	4.54823e-09	2.67456e-07
chr12	86938991	86940423	H3K27ac_35342	1.62923	4.14583	78.0269	4.62317e-09	2.71116e-07
chr11	5408393	5411072	H3K27ac_30096	1.43299	3.96088	72.5805	4.70771e-09	2.75317e-07
chr2	33724008	33725222	H3K27ac_4704	1.77203	2.0158	72.5483	4.72822e-09	2.75761e-07
chr1	43224935	43226612	H3K27ac_463	1.99218	2.56271	74.9381	4.82351e-09	2.80552e-07
chr15	93425311	93426219	H3K27ac_41789	1.25445	4.08148	72.3189	4.87719e-09	2.82904e-07
chr12	17709103	17710398	H3K27ac_34178	2.25047	2.0054	75.0031	4.96872e-09	2.87432e-07
chr5	76187094	76188880	H3K27ac_14123	1.5291	2.47352	72.125	5.00709e-09	2.8809e-07
chr11	94858288	94862706	H3K27ac_32570	1.13853	5.20414	72.1286	5.00466e-09	2.8809e-07
chr10	80759370	80759908	H3K27ac_28646	1.54699	2.51454	72.086	5.03367e-09	2.88841e-07
chr19	53575147	53576122	H3K27ac_48998	1.71462	2.67329	72.0381	5.06651e-09	2.89946e-07
chr8	129361652	129364963	H3K27ac_23933	1.03283	5.6355	72.0096	5.0861e-09	2.90288e-07
chr4	62244619	62246599	H3K27ac_11169	1.26612	3.73929	71.9571	5.12253e-09	2.91588e-07
chr3	51847475	51853692	H3K27ac_8073	1.28996	6.67025	75.9617	5.19234e-09	2.94776e-07
chr1	167122525	167123061	H3K27ac_2971	1.91731	2.04702	71.8338	5.20915e-09	2.94946e-07
chr14	62299726	62303464	H3K27ac_39246	0.964092	7.24007	71.7772	5.24943e-09	2.9644e-07
chr17	50320575	50322879	H3K27ac_45471	1.38659	2.8976	71.4836	5.46387e-09	3.07736e-07
chr9	13228136	13229392	H3K27ac_24113	1.5457	2.75746	71.3939	5.53124e-09	3.1071e-07
chr13	113299742	113302401	H3K27ac_38136	-1.1317	4.26214	71.2302	5.6565e-09	3.16913e-07
chr17	33917721	33919469	H3K27ac_44939	1.34098	4.78197	73.408	5.69651e-09	3.18318e-07
chr15	66793112	66795186	H3K27ac_41082	1.53086	2.88975	70.8755	5.93859e-09	3.30979e-07
chr2	105236556	105237967	H3K27ac_5937	1.67537	2.48715	70.7885	6.01007e-09	3.34091e-07
chr17	84547736	84549225	H3K27ac_46177	1.22915	4.14318	70.6199	6.15121e-09	3.41048e-07
chr4	132302389	132306278	H3K27ac_12254	0.993553	6.06581	70.4309	6.31371e-09	3.48735e-07
chr11	59921211	59923410	H3K27ac_31384	1.18758	5.5736	71.5496	6.32252e-09	3.48735e-07
chr8	109637421	109639369	H3K27ac_23364	1.43629	3.07525	70.3871	6.35195e-09	3.49456e-07
chr10	41599241	41602475	H3K27ac_27773	-1.73007	3.85561	71.7469	6.38196e-09	3.50204e-07
chr7	134944003	134944926	H3K27ac_21488	1.80803	2.44439	70.2589	6.46561e-09	3.53884e-07
chr2	153319461	153321023	H3K27ac_6811	1.33792	4.0293	70.1295	6.58245e-09	3.57529e-07
chr6	119148390	119149930	H3K27ac_18052	-1.8781	2.51475	70.1478	6.56577e-09	3.57529e-07
chr11	100581767	100584289	H3K27ac_32886	1.52247	3.61442	70.1623	6.5526e-09	3.57529e-07
chr19	10882397	10885255	H3K27ac_48066	1.51558	4.07174	72.7528	6.67413e-09	3.61589e-07
chr5	139640264	139644282	H3K27ac_15625	-1.1673	5.68486	69.9286	6.76833e-09	3.65764e-07
chr5	143762065	143763515	H3K27ac_15760	1.57245	2.28473	69.7516	6.93689e-09	3.73926e-07
chr1	193255402	193256847	H3K27ac_3626	1.27409	3.65742	69.6542	7.0315e-09	3.78072e-07
chr18	82691221	82693038	H3K27ac_47648	1.65195	2.83441	69.236	7.45404e-09	3.99784e-07
chr1	10246631	10248877	H3K27ac_31	-1.6927	2.8309	69.0986	7.59877e-09	4.05145e-07
chr4	8830471	8831310	H3K27ac_10404	2.82795	2.07116	84.6033	7.58693e-09	4.05145e-07
chr5	115983621	115986142	H3K27ac_14973	1.36635	4.69252	72.0711	7.61094e-09	4.05145e-07
chr10	86278240	86279880	H3K27ac_28773	1.45194	2.91883	69.0133	7.69016e-09	4.08344e-07
chr12	88199501	88202275	H3K27ac_35388	1.13009	4.80487	68.9825	7.72344e-09	4.09093e-07
chr13	113077557	113081170	H3K27ac_38109	-0.984826	6.15905	68.9429	7.76636e-09	4.10348e-07
chr6	17231469	17232579	H3K27ac_16120	1.68464	2.53065	68.826	7.89493e-09	4.15247e-07
chr8	122858192	122860591	H3K27ac_23677	1.66938	4.16333	77.1644	7.89799e-09	4.15247e-07
chr9	107887405	107888111	H3K27ac_26293	1.24153	3.67503	68.7645	7.9634e-09	4.17658e-07
chr11	68931458	68932368	H3K27ac_31586	1.24311	3.99203	68.6853	8.05255e-09	4.20439e-07
chr19	53477818	53480196	H3K27ac_48989	1.98693	3.96679	83.9999	8.05582e-09	4.20439e-07
chr19	46431921	46433270	H3K27ac_48871	1.91823	2.80245	71.1832	8.18905e-09	4.2635e-07
chr11	59918448	59920862	H3K27ac_31383	1.07894	7.27938	68.5118	8.2517e-09	4.27526e-07
chr14	71361984	71364307	H3K27ac_39489	1.75384	3.73943	74.9156	8.24724e-09	4.27526e-07
chr10	82466178	82469641	H3K27ac_28713	1.23013	4.65535	68.4555	8.31745e-09	4.29556e-07
chr12	70637648	70641520	H3K27ac_34726	1.12562	6.63552	68.4438	8.33113e-09	4.29556e-07
chr2	32734920	32735926	H3K27ac_4672	1.44435	2.34739	68.3977	8.38558e-09	4.30285e-07
chr4	149062833	149068661	H3K27ac_12823	1.11202	5.71564	68.4024	8.37997e-09	4.30285e-07
chr11	79429036	79430036	H3K27ac_32067	1.70978	2.44155	68.3461	8.44682e-09	4.32388e-07
chr11	76637438	76640087	H3K27ac_31920	1.92238	3.12833	73.3018	8.55981e-09	4.37124e-07
chr10	94602294	94610613	H3K27ac_29000	1.9765	5.92726	100.339	8.67149e-09	4.4177e-07
chr8	131223590	131225138	H3K27ac_24040	1.50832	2.30386	68.1049	8.73982e-09	4.44191e-07
chr10	77046555	77047233	H3K27ac_28492	1.5057	2.15974	68.0791	8.77171e-09	4.44753e-07
chr1	37642471	37643329	H3K27ac_293	1.56641	2.13516	67.8969	9.00117e-09	4.53634e-07
chr3	52669441	52671364	H3K27ac_8180	1.61591	2.67396	67.8564	9.05312e-09	4.53634e-07
chr8	109815396	109818515	H3K27ac_23372	1.00998	6.67645	67.8986	8.99909e-09	4.53634e-07
chr9	108940784	108942136	H3K27ac_26357	1.23345	4.15619	67.862	9.04586e-09	4.53634e-07
chr13	43330452	43331689	H3K27ac_36782	1.91215	1.99975	67.8785	9.02478e-09	4.53634e-07
chr7	73362757	73365435	H3K27ac_19948	2.04222	2.82736	73.5	9.08256e-09	4.54043e-07
chr3	51892127	51893333	H3K27ac_8075	1.59304	3.48523	67.7297	9.21742e-09	4.58636e-07
chr17	87764209	87765367	H3K27ac_46336	1.41769	3.0676	67.7372	9.20763e-09	4.58636e-07
chr12	87019279	87021571	H3K27ac_35354	1.43128	3.51558	67.6067	9.38013e-09	4.65647e-07
chr6	99470368	99473900	H3K27ac_17714	0.98915	7.06983	67.5634	9.43812e-09	4.66357e-07
chr19	43990936	43992723	H3K27ac_48805	1.17091	3.88686	67.5761	9.42101e-09	4.66357e-07
chr7	135814627	135816792	H3K27ac_21561	1.70567	2.80299	67.4033	9.65589e-09	4.75464e-07
chr9	43850832	43858532	H3K27ac_24671	1.14838	7.50526	67.3952	9.66698e-09	4.75464e-07
chr16	97755804	97759187	H3K27ac_44052	1.123	4.83352	67.2216	9.9096e-09	4.86277e-07
chr14	26285563	26287066	H3K27ac_38500	1.58483	2.57724	67.1631	9.99277e-09	4.89233e-07
chr16	36631610	36634129	H3K27ac_42939	-1.56929	3.15896	67.0091	1.02154e-08	4.9899e-07
chr1	40108713	40116845	H3K27ac_410	-0.979949	5.63987	66.8872	1.03955e-08	5.03995e-07
chr2	152729414	152731346	H3K27ac_6768	1.66419	3.70247	70.6699	1.04087e-08	5.03995e-07
chr2	165682716	165684022	H3K27ac_7147	1.90814	3.01671	70.3489	1.04123e-08	5.03995e-07
chr16	3820283	3821388	H3K27ac_42191	2.13267	2.25257	71.8052	1.03486e-08	5.03995e-07
chr17	19103474	19106996	H3K27ac_44336	-1.10565	5.46766	66.8568	1.0441e-08	5.04238e-07
chr8	131176788	131179092	H3K27ac_24029	1.72962	3.88941	74.7513	1.05143e-08	5.06632e-07
chr3	90407067	90410560	H3K27ac_8827	1.18023	5.55084	68.4854	1.06327e-08	5.08889e-07
chr3	96382418	96384412	H3K27ac_9008	1.46426	4.46424	71.3477	1.06163e-08	5.08889e-07
chr5	77796289	77799754	H3K27ac_14182	2.07482	3.53733	79.6482	1.06172e-08	5.08889e-07
chr16	14361655	14362906	H3K27ac_42413	0.991828	4.97399	66.6324	1.0783e-08	5.14932e-07
chr1	89545344	89548996	H3K27ac_1510	1.10258	3.99808	66.3184	1.1282e-08	5.31921e-07
chr2	30121113	30122897	H3K27ac_4484	1.36497	2.95925	66.3059	1.13024e-08	5.31921e-07
chr6	137505277	137508694	H3K27ac_18664	1.37074	4.13789	66.9625	1.11825e-08	5.31921e-07
chr11	116114730	116118188	H3K27ac_33627	1.13251	5.94756	66.988	1.13132e-08	5.31921e-07
chr12	56563295	56569418	H3K27ac_34626	1.02387	7.13696	66.3359	1.12536e-08	5.31921e-07
chr15	93080811	93084022	H3K27ac_41769	-0.994278	5.06346	66.3425	1.12428e-08	5.31921e-07
chr15	101980376	101981981	H3K27ac_42140	1.45243	4.27085	69.9011	1.12976e-08	5.31921e-07
chr14	20996404	21000972	H3K27ac_38411	1.08898	5.18189	66.1389	1.15784e-08	5.43192e-07
chr17	32254938	32255671	H3K27ac_44866	1.728	2.26242	66.0501	1.17281e-08	5.49008e-07
chr10	43723052	43724028	H3K27ac_27847	1.00397	5.09632	66.02	1.17793e-08	5.50197e-07
chr11	76659301	76660509	H3K27ac_31925	1.13617	5.12552	65.9685	1.18676e-08	5.53111e-07
chr16	38394788	38396118	H3K27ac_42994	1.70513	2.53134	65.944	1.19097e-08	5.53864e-07
chr16	10688976	10691948	H3K27ac_42314	1.15488	4.55862	65.8354	1.20988e-08	5.61435e-07
chr11	18856862	18858590	H3K27ac_30267	1.8761	2.33379	67.0617	1.22758e-08	5.67186e-07
chr17	79273811	79275785	H3K27ac_46019	-1.73886	2.7714	65.9406	1.22741e-08	5.67186e-07
chr13	30877210	30879263	H3K27ac_36531	1.03989	4.96893	65.7061	1.2328e-08	5.68367e-07
chr2	35361631	35363400	H3K27ac_4791	1.32701	3.36054	65.6806	1.23738e-08	5.69248e-07
chr17	34346453	34349376	H3K27ac_44999	1.01345	5.43633	65.578	1.25597e-08	5.76559e-07
chr2	18818623	18820376	H3K27ac_4172	1.72874	3.1784	67.1923	1.27159e-08	5.82457e-07
chr4	8617000	8619442	H3K27ac_10370	1.10159	6.47825	65.4593	1.27787e-08	5.82457e-07
chr6	125444052	125445016	H3K27ac_18308	1.21115	4.17659	65.4493	1.27973e-08	5.82457e-07
chr8	36490962	36494153	H3K27ac_22326	-1.29465	3.58255	65.471	1.27569e-08	5.82457e-07
chr12	79328255	79328642	H3K27ac_35034	1.42288	2.76298	65.268	1.31403e-08	5.96792e-07
chr1	157005720	157006602	H3K27ac_2660	0.885825	6.40835	65.0156	1.36343e-08	6.17913e-07
chr2	11626704	11628346	H3K27ac_4077	1.05085	5.14128	64.8517	1.39658e-08	6.31597e-07
chr6	126757571	126763450	H3K27ac_18311	-1.49868	5.31757	69.8111	1.40986e-08	6.34999e-07
chr11	100758308	100761037	H3K27ac_32913	1.05214	4.34176	64.7862	1.41005e-08	6.34999e-07
chr2	77007881	77008880	H3K27ac_5494	1.67422	2.51321	64.7201	1.42382e-08	6.39376e-07
chr7	53644137	53648052	H3K27ac_19702	-1.1718	5.43429	64.7108	1.42576e-08	6.39376e-07
chr11	67371963	67374898	H3K27ac_31531	2.00666	3.39772	75.3845	1.44513e-08	6.46705e-07
chr14	70732441	70737030	H3K27ac_39473	1.459	4.18911	68.011	1.45476e-08	6.49651e-07
chr12	17716923	17719300	H3K27ac_34179	1.82203	2.93624	66.5666	1.46112e-08	6.5113e-07
chr16	76002271	76003004	H3K27ac_43588	1.56288	2.56764	64.5127	1.46791e-08	6.52793e-07
chr7	87520464	87521471	H3K27ac_20340	1.95424	2.79349	68.5932	1.50615e-08	6.68407e-07
chr10	94775288	94777378	H3K27ac_29021	1.24603	3.95371	64.2977	1.51518e-08	6.71017e-07
chr10	84230900	84232540	H3K27ac_28745	-1.42514	3.14626	64.2208	1.53248e-08	6.77275e-07
chr16	93571127	93577066	H3K27ac_43892	-1.16312	6.18718	64.0544	1.57065e-08	6.92708e-07
chr16	36665138	36668119	H3K27ac_42945	-1.08555	4.58272	63.9944	1.58467e-08	6.9745e-07
chr4	100907501	100908442	H3K27ac_11534	1.7624	2.35165	63.9435	1.59666e-08	7.01284e-07
chr10	44712972	44715449	H3K27ac_27884	1.62168	2.56944	63.9241	1.60126e-08	7.01858e-07
chr5	77800036	77802981	H3K27ac_14183	1.75079	4.24119	75.8335	1.61589e-08	7.06821e-07
chr4	8936165	8937913	H3K27ac_10416	1.54976	3.89252	64.9028	1.65456e-08	7.22255e-07
chr8	36488296	36490674	H3K27ac_22325	-1.5141	2.7495	63.6652	1.664e-08	7.23893e-07
chr12	56543795	56545316	H3K27ac_34623	1.46527	2.74489	63.6607	1.6651e-08	7.23893e-07
chr11	86770691	86773186	H3K27ac_32327	1.27549	3.29113	63.6222	1.67466e-08	7.26573e-07
chr9	40974829	40978626	H3K27ac_24616	-1.30356	3.23915	63.5234	1.69948e-08	7.35842e-07
chr14	65992417	65993817	H3K27ac_39374	1.59457	2.91522	63.2496	1.77029e-08	7.64953e-07
chr1	58357098	58359808	H3K27ac_820	-1.37257	3.93345	63.192	1.7856e-08	7.66912e-07
chr5	143672860	143674926	H3K27ac_15753	1.33487	3.70935	63.195	1.78478e-08	7.66912e-07
chr10	19838086	19840752	H3K27ac_27304	-1.48396	3.53941	63.2122	1.78022e-08	7.66912e-07
chr3	100874627	100877668	H3K27ac_9117	1.50391	3.39002	63.1431	1.7987e-08	7.69743e-07
chr4	32834350	32836988	H3K27ac_10692	-1.41688	3.4265	63.1338	1.8012e-08	7.69743e-07
chr6	43215608	43216126	H3K27ac_16622	1.38795	2.96368	63.127	1.80301e-08	7.69743e-07
chr17	27926376	27928411	H3K27ac_44593	1.5411	2.97589	63.105	1.80898e-08	7.70749e-07
chr4	124385612	124387773	H3K27ac_11962	1.06131	5.00245	63.0636	1.8202e-08	7.73508e-07
chr13	117779459	117782655	H3K27ac_38223	1.20338	3.79919	63.0545	1.8227e-08	7.73508e-07
chr7	108218775	108221945	H3K27ac_20796	1.25191	4.27999	62.9368	1.85511e-08	7.85697e-07
chr6	134297523	134299986	H3K27ac_18520	-1.42303	2.95853	62.7843	1.89805e-08	8.01181e-07
chr9	107171308	107175244	H3K27ac_26253	1.31874	3.12029	62.7803	1.89917e-08	8.01181e-07
chr17	27928984	27930708	H3K27ac_44594	1.58768	2.98038	62.73	1.91358e-08	8.05667e-07
chr11	79489295	79492524	H3K27ac_32077	1.07216	4.97547	62.5953	1.95273e-08	8.2053e-07
chr13	41917676	41919842	H3K27ac_36747	1.54179	2.34813	62.5363	1.97015e-08	8.26225e-07
chr1	39817643	39819404	H3K27ac_362	1.47975	3.38523	62.4506	1.99576e-08	8.35324e-07
chr5	114435481	114437820	H3K27ac_14873	1.23355	4.28015	62.3798	2.01717e-08	8.42631e-07
chr14	55050025	55051132	H3K27ac_39016	1.73644	3.56338	67.7936	2.03163e-08	8.47016e-07
chr11	119531135	119534615	H3K27ac_33813	0.953783	5.24693	62.2687	2.0513e-08	8.53549e-07
chr7	31758559	31758831	H3K27ac_19514	1.5384	2.65197	62.2402	2.06014e-08	8.55558e-07
chr7	135667114	135668036	H3K27ac_21539	1.0396	4.76186	62.1929	2.0749e-08	8.60017e-07
chr9	65404560	65405963	H3K27ac_25425	1.41447	2.43495	62.1364	2.09273e-08	8.65724e-07
chr5	113542800	113544119	H3K27ac_14845	1.3498	3.4704	62.0764	2.11181e-08	8.71242e-07
chr10	117303724	117304508	H3K27ac_29519	2.04635	2.13386	65.2864	2.11423e-08	8.71242e-07
chr4	151558433	151566100	H3K27ac_12927	1.10412	7.80443	61.96	2.14936e-08	8.84013e-07
chr7	73254741	73256521	H3K27ac_19922	1.32815	4.71177	65.5534	2.18927e-08	8.98695e-07
chr12	114103270	114103770	H3K27ac_35940	1.58569	1.97384	61.758	2.21626e-08	9.0803e-07
chr12	17455752	17458560	H3K27ac_34153	1.29586	3.49583	61.7264	2.22693e-08	9.10652e-07
chr6	86427205	86429150	H3K27ac_17283	1.49491	2.32216	61.6857	2.24077e-08	9.12813e-07
chr9	42016352	42019249	H3K27ac_24641	1.32698	3.91689	61.696	2.23727e-08	9.12813e-07
chr2	52159136	52161518	H3K27ac_4935	-1.94029	3.09418	68.248	2.24918e-08	9.14497e-07
chr1	157069814	157072021	H3K27ac_2667	1.09197	4.30921	61.6212	2.26287e-08	9.18311e-07
chr12	17511831	17519283	H3K27ac_34158	1.03125	6.82627	61.5352	2.2927e-08	9.28653e-07
chr8	93400110	93401732	H3K27ac_23131	1.11771	3.99867	61.5186	2.29849e-08	9.29233e-07
chr9	123993953	123995744	H3K27ac_26880	-1.40646	3.44355	61.4645	2.31752e-08	9.3311e-07
chr11	115048753	115051068	H3K27ac_33520	0.910376	5.49089	61.4584	2.31969e-08	9.3311e-07
chr12	104786042	104789478	H3K27ac_35666	-1.35324	3.47428	61.4541	2.32119e-08	9.3311e-07
chr16	38346971	38348893	H3K27ac_42980	0.91873	5.17202	61.3055	2.37443e-08	9.5073e-07
chr16	38457684	38464136	H3K27ac_43004	1.32376	4.92121	66.6113	2.37588e-08	9.5073e-07
chr19	45089035	45091057	H3K27ac_48832	1.12253	4.28385	61.2946	2.37838e-08	9.5073e-07
chr18	82701017	82707150	H3K27ac_47651	1.20279	5.88658	64.4972	2.38725e-08	9.52491e-07
chr9	120024622	120026074	H3K27ac_26699	1.69802	3.13934	63.691	2.39534e-08	9.53934e-07
chr7	116133866	116135260	H3K27ac_20954	1.55426	2.29942	61.0807	2.4575e-08	9.76868e-07
chr19	47433409	47434444	H3K27ac_48929	1.5853	2.28632	61.0665	2.46281e-08	9.7716e-07
chr11	113055142	113057389	H3K27ac_33474	1.41262	3.39287	61.0313	2.47614e-08	9.7881e-07
chrX	7339167	7341797	H3K27ac_49181	0.879745	5.61838	61.0348	2.47483e-08	9.7881e-07
chr15	78858156	78858820	H3K27ac_41383	1.09495	4.79316	61.0024	2.48713e-08	9.81335e-07
chr11	57833456	57835909	H3K27ac_31298	1.33637	2.68823	60.9338	2.51343e-08	9.87414e-07
chr11	88551926	88554040	H3K27ac_32460	1.45973	2.50714	60.9268	2.51614e-08	9.87414e-07
chr14	78809101	78810477	H3K27ac_39732	1.76512	2.5314	62.316	2.51641e-08	9.87414e-07
chr18	12289269	12291520	H3K27ac_46499	1.35634	3.66907	60.8305	2.5536e-08	1.00017e-06
chr14	26298941	26302297	H3K27ac_38502	0.937636	5.71043	60.6933	2.60803e-08	1.01962e-06
chr12	56586775	56589443	H3K27ac_34629	1.20973	4.16281	60.5817	2.65322e-08	1.0339e-06
chr17	84554777	84557476	H3K27ac_46178	1.50251	3.99726	60.5792	2.65425e-08	1.0339e-06
chr2	61400308	61403060	H3K27ac_5111	-1.4472	3.50417	60.5607	2.6618e-08	1.03495e-06
chr7	52466390	52467400	H3K27ac_19648	1.41452	2.51802	60.4862	2.69257e-08	1.04501e-06
chr13	30882363	30886221	H3K27ac_36532	1.04311	5.44625	60.3009	2.7707e-08	1.07338e-06
chr10	127195459	127197710	H3K27ac_29809	1.34546	2.67348	60.2294	2.80149e-08	1.08334e-06
chr17	87461482	87463622	H3K27ac_46314	1.55461	2.46672	60.1902	2.81854e-08	1.08797e-06
chr11	51645171	51652893	H3K27ac_30966	1.12272	6.16796	62.05	2.84602e-08	1.09659e-06
chr2	11608094	11613717	H3K27ac_4074	1.18043	4.17991	60.0463	2.88203e-08	1.10846e-06
chr11	62633487	62634911	H3K27ac_31463	1.30486	3.80238	59.9904	2.90711e-08	1.1161e-06
chr10	20919788	20921120	H3K27ac_27355	1.54339	3.19198	60.1089	2.93349e-08	1.1242e-06
chr5	65093026	65093607	H3K27ac_13850	1.62516	1.85648	59.8337	2.97873e-08	1.13566e-06
chr17	27219663	27221598	H3K27ac_44564	1.54239	3.88659	63.8893	2.97688e-08	1.13566e-06
chr19	42043234	42045098	H3K27ac_48777	-1.54129	2.69512	59.8324	2.97934e-08	1.13566e-06
chr11	4094138	4096504	H3K27ac_29964	1.23537	3.60989	59.8068	2.99118e-08	1.13814e-06
chr11	86738069	86739950	H3K27ac_32324	1.29981	3.51503	59.793	2.99764e-08	1.13857e-06
chr7	87589448	87591607	H3K27ac_20347	1.28407	4.11316	59.7676	3.00947e-08	1.13995e-06
chr16	38360100	38361391	H3K27ac_42988	1.48889	2.36117	59.7623	3.01195e-08	1.13995e-06
chr11	51686159	51689157	H3K27ac_30975	1.40054	3.96584	61.4088	3.02684e-08	1.14356e-06
chr2	83583877	83586623	H3K27ac_5594	1.24461	5.22726	64.2372	3.05659e-08	1.14723e-06
chr6	114816300	114817529	H3K27ac_17955	1.36305	2.57248	59.6925	3.04485e-08	1.14723e-06
chr7	150239911	150245540	H3K27ac_21853	1.80003	4.75463	79.0598	3.05806e-08	1.14723e-06
chr17	29477426	29479734	H3K27ac_44709	1.00624	4.38315	59.674	3.05363e-08	1.14723e-06
chr6	115945108	115946753	H3K27ac_18018	1.1464	4.18446	59.5416	3.11729e-08	1.16461e-06
chr11	75468638	75470483	H3K27ac_31842	1.00345	5.3017	59.5457	3.11529e-08	1.16461e-06
chr18	5932097	5933014	H3K27ac_46448	1.71268	2.35475	59.5345	3.12076e-08	1.16461e-06
chr11	74359353	74362177	H3K27ac_31770	1.28781	3.66963	59.4637	3.15538e-08	1.17548e-06
chr8	60054145	60056409	H3K27ac_22504	1.34244	3.87565	59.4886	3.22848e-08	1.20061e-06
chr2	101636963	101638305	H3K27ac_5812	1.08973	4.02144	59.2682	3.25326e-08	1.20772e-06
chr2	34831088	34834803	H3K27ac_4742	1.00342	5.09625	59.2508	3.26216e-08	1.20892e-06
chr5	34880448	34882187	H3K27ac_13516	1.24906	3.55966	59.2124	3.28179e-08	1.21199e-06
chr6	119584896	119586571	H3K27ac_18076	1.49212	2.40199	59.2199	3.27794e-08	1.21199e-06
chr16	89993025	89995079	H3K27ac_43746	1.25953	4.21043	59.2887	3.33659e-08	1.22798e-06
chr16	95370867	95375020	H3K27ac_43970	-1.08892	4.36584	59.1116	3.33404e-08	1.22798e-06
chr12	86980812	86982912	H3K27ac_35349	1.58596	3.21231	60.2783	3.37241e-08	1.23903e-06
chr6	39265341	39267573	H3K27ac_16527	-1.09755	4.28614	58.9336	3.42848e-08	1.24888e-06
chr9	13708051	13709115	H3K27ac_24146	1.57058	2.16074	58.9389	3.42561e-08	1.24888e-06
chr12	33904842	33906487	H3K27ac_34393	1.63414	3.11783	60.6111	3.40968e-08	1.24888e-06
chr13	102566353	102568226	H3K27ac_37904	1.41616	2.38159	58.946	3.42178e-08	1.24888e-06
chr16	10654786	10657423	H3K27ac_42306	1.32143	3.21049	58.9431	3.42332e-08	1.24888e-06
chr12	70537285	70539219	H3K27ac_34710	1.48944	2.72579	58.834	3.48253e-08	1.26641e-06
chr1	132985573	132988085	H3K27ac_2094	1.26115	3.44653	58.7694	3.51813e-08	1.2766e-06
chr4	140422244	140424665	H3K27ac_12642	1.3277	4.48139	61.8619	3.52851e-08	1.2766e-06
chr11	117110397	117112192	H3K27ac_33675	1.55924	3.31415	60.0986	3.52598e-08	1.2766e-06
chr12	17701420	17702243	H3K27ac_34175	1.64589	2.03337	58.7156	3.54802e-08	1.28149e-06
chr1	90974859	90976540	H3K27ac_1593	1.26979	2.75688	58.5393	3.64803e-08	1.31317e-06
chr11	94857006	94857693	H3K27ac_32569	1.54579	2.39666	58.5473	3.64346e-08	1.31317e-06
chr19	7044749	7046261	H3K27ac_47918	1.21089	3.965	58.4023	3.72784e-08	1.33964e-06
chr11	67390738	67393164	H3K27ac_31533	2.00312	2.5835	64.6977	3.74009e-08	1.34178e-06
chr11	119536756	119540022	H3K27ac_33814	1.05679	5.31781	58.3691	3.75464e-08	1.34249e-06
chr13	31077281	31078419	H3K27ac_36558	1.58321	2.66467	58.3656	3.74951e-08	1.34249e-06
chr15	66961806	66966824	H3K27ac_41101	1.17636	4.42768	58.2931	3.79277e-08	1.35386e-06
chr1	40492292	40494813	H3K27ac_433	1.45066	3.70898	60.0514	3.83133e-08	1.36306e-06
chr12	25951663	25954901	H3K27ac_34254	1.03443	5.0473	58.2318	3.82977e-08	1.36306e-06
chr3	103207327	103211310	H3K27ac_9184	-1.3455	4.05813	58.4224	3.84816e-08	1.3645e-06
chr14	66883420	66885792	H3K27ac_39401	1.3685	2.77135	58.2116	3.84207e-08	1.3645e-06
chr14	122421691	122430556	H3K27ac_40108	1.04106	5.49139	58.1691	3.86802e-08	1.36927e-06
chr14	32477611	32479489	H3K27ac_38691	1.17505	3.94255	58.1333	3.89001e-08	1.37477e-06
chr4	94881164	94883400	H3K27ac_11462	-1.58617	3.55302	59.9287	3.90279e-08	1.37701e-06
chr11	114733663	114739059	H3K27ac_33502	-1.34537	5.31346	60.3383	3.9222e-08	1.38157e-06
chr3	95448517	95450313	H3K27ac_8930	1.09957	3.81692	58.0468	3.94378e-08	1.38233e-06
chr4	147414826	147416397	H3K27ac_12773	1.09682	3.87221	58.0516	3.94079e-08	1.38233e-06
chr10	68243400	68245415	H3K27ac_28330	-1.45277	3.19159	58.0558	3.93812e-08	1.38233e-06
chr2	28400888	28403518	H3K27ac_4408	1.40604	3.91758	59.9991	3.9626e-08	1.38418e-06
chr3	51363440	51365957	H3K27ac_8036	0.987313	7.50425	58.0116	3.96586e-08	1.38418e-06
chr7	86507355	86509810	H3K27ac_20287	1.2541	4.70295	58.3162	3.96852e-08	1.38418e-06
chr13	24637396	24643773	H3K27ac_36408	-1.24578	5.31152	58.8095	3.97902e-08	1.38558e-06
chr6	94865914	94867579	H3K27ac_17519	1.47206	2.55663	57.9143	4.02766e-08	1.40023e-06
chr7	3657539	3659248	H3K27ac_19009	1.59409	2.74685	57.8838	4.04726e-08	1.40476e-06
chr2	33070794	33073222	H3K27ac_4693	1.05371	4.26891	57.7681	4.12251e-08	1.42856e-06
chr11	69228777	69230012	H3K27ac_31603	1.15628	4.15091	57.7486	4.13534e-08	1.43068e-06
chr6	134133657	134135284	H3K27ac_18487	1.71253	2.58672	57.7993	4.2084e-08	1.4536e-06
chr7	87906828	87909721	H3K27ac_20379	1.2779	3.8066	57.6005	4.23416e-08	1.45778e-06
chr14	21614430	21616596	H3K27ac_38440	1.07433	5.97388	58.7735	4.23004e-08	1.45778e-06
chr16	11369190	11371266	H3K27ac_42363	2.52684	2.88672	75.1555	4.27085e-08	1.46804e-06
chr11	20232774	20233525	H3K27ac_30301	0.984305	4.4862	57.5009	4.30201e-08	1.47638e-06
chr13	55290519	55292165	H3K27ac_37251	0.97369	5.14517	57.4619	4.32894e-08	1.48323e-06
chr3	104591590	104592530	H3K27ac_9248	1.17298	4.10148	57.4304	4.35079e-08	1.48833e-06
chr12	85546218	85548761	H3K27ac_35256	0.955353	5.29174	57.3459	4.41002e-08	1.50618e-06
chr11	120370948	120372957	H3K27ac_33855	1.43888	3.67522	58.1794	4.43355e-08	1.5118e-06
chr1	39988370	39991352	H3K27ac_378	1.23322	3.61028	57.2746	4.46067e-08	1.51862e-06
chr4	128940876	128941753	H3K27ac_12091	1.89092	2.30939	60.34	4.49368e-08	1.52257e-06
chr14	122439999	122442489	H3K27ac_40110	1.21699	4.18904	57.2391	4.48613e-08	1.52257e-06
chr15	36389860	36391831	H3K27ac_40502	1.39732	3.49663	57.2332	4.49041e-08	1.52257e-06
chr5	134716332	134724825	H3K27ac_15451	-1.03227	6.27283	57.2131	4.50489e-08	1.52395e-06
chr1	129755394	129756761	H3K27ac_1963	-1.83497	2.00895	57.1693	4.53668e-08	1.52825e-06
chr2	33346212	33348215	H3K27ac_4698	-1.5205	2.46406	57.166	4.53907e-08	1.52825e-06
chr8	129380829	129385043	H3K27ac_23936	0.978544	4.92693	57.1845	4.52557e-08	1.52825e-06
chr11	113057455	113058280	H3K27ac_33475	1.51442	2.02569	57.1466	4.5532e-08	1.53059e-06
chr9	45917606	45919799	H3K27ac_24858	1.62229	2.88434	57.93	4.56426e-08	1.5319e-06
chr13	25012379	25014518	H3K27ac_36450	-1.33148	4.13995	57.1023	4.58571e-08	1.53427e-06
chrX	68617634	68619157	H3K27ac_49529	1.00065	4.67409	57.1068	4.58239e-08	1.53427e-06
chr4	149775155	149777083	H3K27ac_12855	1.69988	2.65294	57.0584	4.61813e-08	1.53789e-06
chr9	40196281	40199218	H3K27ac_24566	1.15847	3.99068	57.0657	4.61272e-08	1.53789e-06
chr18	32722983	32724948	H3K27ac_46630	1.1327	4.04055	57.0733	4.60712e-08	1.53789e-06
chr2	28389598	28390312	H3K27ac_4404	1.6895	2.12055	57.0333	4.6368e-08	1.5417e-06
chr10	66558792	66564310	H3K27ac_28190	0.92985	7.26465	56.9461	4.70227e-08	1.56104e-06
chr2	118484173	118486143	H3K27ac_6079	1.39224	3.58638	57.0857	4.71874e-08	1.56407e-06
chr1	43502285	43505148	H3K27ac_473	0.972721	6.89266	56.8289	4.79189e-08	1.58585e-06
chr14	119089638	119092409	H3K27ac_39964	1.32132	3.99228	57.3742	4.81825e-08	1.59211e-06
chr9	40905912	40930833	H3K27ac_24605	-0.922745	7.49764	56.6942	4.89711e-08	1.61567e-06
chr16	10991957	10993196	H3K27ac_42343	0.942342	4.5316	56.6769	4.9108e-08	1.61768e-06
chr19	3935357	3936524	H3K27ac_47766	1.16499	3.52001	56.6674	4.91836e-08	1.61768e-06
chr10	92723746	92727292	H3K27ac_28882	1.01368	4.24645	56.6063	4.96707e-08	1.63119e-06
chr1	88336868	88340793	H3K27ac_1472	0.95493	7.57914	56.5811	4.98739e-08	1.63534e-06
chr5	136115304	136116576	H3K27ac_15516	1.65236	3.20841	58.7128	5.00882e-08	1.63985e-06
chr2	72650489	72654171	H3K27ac_5345	1.31524	3.34396	56.5142	5.04158e-08	1.64805e-06
chr1	182872031	182873960	H3K27ac_3418	1.00129	6.23816	56.5043	5.04965e-08	1.64805e-06
chr2	28372130	28376685	H3K27ac_4398	0.953207	6.4626	56.4953	5.05703e-08	1.64805e-06
chr12	17729367	17735587	H3K27ac_34181	1.04722	5.82415	56.4305	5.11032e-08	1.66035e-06
chr17	74251308	74253048	H3K27ac_45969	-2.02942	2.2877	56.434	5.1075e-08	1.66035e-06
chr2	165684078	165685297	H3K27ac_7148	1.65388	2.15069	56.3433	5.18308e-08	1.68143e-06
chr1	140445164	140447852	H3K27ac_2376	1.73596	4.27039	69.6286	5.29599e-08	1.71545e-06
chr4	8992868	8994814	H3K27ac_10423	1.3927	3.35898	56.1824	5.3202e-08	1.72068e-06
chr10	80764803	80766899	H3K27ac_28648	0.981495	4.37896	56.1219	5.37272e-08	1.73504e-06
chr14	21197441	21200160	H3K27ac_38417	-0.998943	4.82489	56.0575	5.4293e-08	1.75066e-06
chr16	33784394	33786700	H3K27ac_42895	1.62158	3.03212	57.6436	5.50683e-08	1.77298e-06
chr15	83097320	83099408	H3K27ac_41649	1.87734	2.81688	61.1518	5.61535e-08	1.8052e-06
chr6	37348101	37352369	H3K27ac_16396	1.06426	4.46481	55.8274	5.63666e-08	1.80933e-06
chr11	20376563	20378399	H3K27ac_30303	1.09423	4.08743	55.7968	5.66487e-08	1.81565e-06
chr9	121361034	121367349	H3K27ac_26745	-1.19581	7.11558	56.6018	5.72494e-08	1.83215e-06
chr15	79763702	79764576	H3K27ac_41436	1.36564	3.33304	55.7047	5.75071e-08	1.83764e-06
chr8	89411448	89412777	H3K27ac_23095	1.37497	2.97987	55.6521	5.80032e-08	1.85073e-06
chr17	85253291	85256914	H3K27ac_46244	-1.12335	6.65298	57.437	5.86581e-08	1.86747e-06
chr19	43603999	43606549	H3K27ac_48800	-1.09071	4.73519	55.5788	5.87028e-08	1.86747e-06
chr1	140483286	140491919	H3K27ac_2391	1.3315	6.19674	64.6743	6.05093e-08	1.91637e-06
chr8	14965434	14969390	H3K27ac_22046	1.26192	5.79769	62.1436	6.04537e-08	1.91637e-06
chr17	28647056	28650097	H3K27ac_44646	1.44743	4.31794	61.4939	6.04469e-08	1.91637e-06
chr16	93192259	93194528	H3K27ac_43885	1.46074	2.49456	55.2947	6.15011e-08	1.94489e-06
chr3	88986128	88988768	H3K27ac_8728	1.20193	5.34148	59.116	6.17365e-08	1.94945e-06
chr4	134868501	134871181	H3K27ac_12476	0.92671	5.44532	55.2073	6.23915e-08	1.96722e-06
chr3	88312797	88318941	H3K27ac_8699	0.91607	7.7623	55.1902	6.25669e-08	1.96984e-06
chr9	53192010	53192780	H3K27ac_25012	1.12653	3.6969	55.1219	6.32732e-08	1.98915e-06
chr11	94851890	94856852	H3K27ac_32568	0.848944	6.30095	54.9822	6.47465e-08	2.02994e-06
chr15	67004305	67008446	H3K27ac_41108	0.897294	7.13203	54.9808	6.47611e-08	2.02994e-06
chr11	87824503	87826092	H3K27ac_32397	1.63348	2.57835	55.7064	6.50054e-08	2.03461e-06
chr7	148144632	148145413	H3K27ac_21758	1.68773	2.70005	56.7019	6.57684e-08	2.05248e-06
chr9	65393279	65395239	H3K27ac_25422	1.24707	3.5348	54.8895	6.57438e-08	2.05248e-06
chr1	60935576	60942391	H3K27ac_953	-1.03784	5.88216	55.5169	6.70244e-08	2.08862e-06
chr9	48289156	48289834	H3K27ac_24892	-1.41867	2.82947	54.5871	6.91162e-08	2.15066e-06
chr2	128189443	128195761	H3K27ac_6370	0.907301	6.27508	54.5701	6.93108e-08	2.15358e-06
chr5	101049731	101053758	H3K27ac_14423	1.46778	5.71422	68.4069	6.9615e-08	2.15989e-06
chr13	52986751	52988530	H3K27ac_37193	1.54453	3.40993	57.0227	7.08077e-08	2.19353e-06
chr17	34229065	34230713	H3K27ac_44969	1.29817	3.70932	54.433	7.09048e-08	2.19353e-06
chr4	114746720	114748939	H3K27ac_11742	1.11907	4.37774	54.3971	7.13288e-08	2.20345e-06
chr9	115526543	115528027	H3K27ac_26554	1.54449	2.28353	54.3448	7.19511e-08	2.21678e-06
chr15	78858883	78859821	H3K27ac_41384	1.02815	4.60077	54.3434	7.19679e-08	2.21678e-06
chr7	71049840	71053987	H3K27ac_19849	1.14983	4.14043	54.2902	7.26076e-08	2.23326e-06
chr2	84638446	84640780	H3K27ac_5641	1.0786	4.34267	54.0641	7.53942e-08	2.31276e-06
chr19	24248678	24249976	H3K27ac_48310	1.12884	4.12483	54.0629	7.54089e-08	2.31276e-06
chr12	83331646	83333653	H3K27ac_35211	1.30632	3.28548	54.0442	7.56441e-08	2.31664e-06
chr1	59795121	59797276	H3K27ac_899	1.93126	3.98056	69.9997	7.60223e-08	2.32489e-06
chr9	100964773	100967238	H3K27ac_26163	-1.21345	5.04318	55.0759	7.73242e-08	2.36132e-06
chr7	26495093	26498166	H3K27ac_19332	1.13772	4.9135	55.6529	7.75763e-08	2.36563e-06
chr11	93768805	93770577	H3K27ac_32510	1.45887	3.08036	53.7254	7.97858e-08	2.42954e-06
chr6	145073290	145074735	H3K27ac_18835	1.44113	2.56413	53.7076	8.0024e-08	2.43039e-06
chr7	91299047	91300564	H3K27ac_20497	1.04953	4.90124	53.7063	8.00415e-08	2.43039e-06
chr6	108259262	108261582	H3K27ac_17784	1.6335	2.97177	55.8713	8.17046e-08	2.47737e-06
chr4	88768432	88770901	H3K27ac_11410	1.88827	3.28487	62.3244	8.19325e-08	2.48075e-06
chr7	124536862	124538879	H3K27ac_21131	1.62968	3.41521	57.7743	8.21513e-08	2.48385e-06
chr11	106243600	106245515	H3K27ac_33136	1.66592	2.29465	53.961	8.26275e-08	2.49472e-06
chr12	74865375	74866931	H3K27ac_34876	1.32422	2.88238	53.4407	8.3689e-08	2.5232e-06
chr11	20432089	20432620	H3K27ac_30304	1.40401	2.85703	53.4218	8.39567e-08	2.5277e-06
chr12	85514897	85520179	H3K27ac_35253	0.927098	6.7502	53.3142	8.54899e-08	2.57024e-06
chr17	87645180	87646954	H3K27ac_46324	1.25768	2.88499	53.295	8.57663e-08	2.57492e-06
chr11	94251536	94254437	H3K27ac_32551	1.69763	3.6945	61.4341	8.62134e-08	2.58471e-06
chr5	107716526	107718847	H3K27ac_14671	0.957399	5.37743	53.2241	8.67982e-08	2.59859e-06
chr11	82027037	82029546	H3K27ac_32147	1.09268	4.50545	53.1915	8.72767e-08	2.60925e-06
chr12	106236792	106244187	H3K27ac_35689	1.1303	5.61929	56.3232	8.7462e-08	2.61114e-06
chr11	58018079	58020922	H3K27ac_31323	1.13791	3.78621	53.1348	8.81152e-08	2.62404e-06
chr15	80636513	80638589	H3K27ac_41509	1.42504	2.6619	53.1331	8.81399e-08	2.62404e-06
chr13	33056453	33059579	H3K27ac_36579	0.826516	5.14047	53.1142	8.84219e-08	2.62877e-06
chr16	32550083	32551107	H3K27ac_42812	1.8641	2.08752	55.6573	8.95533e-08	2.6587e-06
chr2	33725329	33726637	H3K27ac_4705	1.58747	2.56892	52.9594	9.07663e-08	2.6903e-06
chr2	69955715	69958109	H3K27ac_5243	1.12582	4.56777	53.4266	9.08697e-08	2.6903e-06
chr1	134313864	134314681	H3K27ac_2162	1.04674	4.21816	52.9343	9.11515e-08	2.69349e-06
chr7	139953623	139970327	H3K27ac_21637	0.948634	8.25855	52.9293	9.12299e-08	2.69349e-06
chr9	110599115	110600746	H3K27ac_26406	1.3849	2.65839	52.8753	9.20675e-08	2.71447e-06
chr2	104655791	104657158	H3K27ac_5928	0.949902	4.49952	52.8428	9.2576e-08	2.72569e-06
chr1	44175119	44177052	H3K27ac_532	0.955585	4.66247	52.7923	9.33705e-08	2.7453e-06
chr16	38476321	38477608	H3K27ac_43015	1.10846	3.78535	52.7615	9.38596e-08	2.75588e-06
chr10	82646253	82647711	H3K27ac_28720	1.42078	3.01426	52.7207	9.45116e-08	2.77121e-06
chr4	134827288	134828680	H3K27ac_12474	1.01401	4.66052	52.5737	9.6901e-08	2.83738e-06
chr3	105601515	105607479	H3K27ac_9300	0.882187	7.39963	52.5276	9.76638e-08	2.8558e-06
chr1	43417075	43419383	H3K27ac_470	1.14635	3.37318	52.503	9.80733e-08	2.85603e-06
chr2	18857017	18862004	H3K27ac_4186	1.14822	5.25081	53.0154	9.80006e-08	2.85603e-06
chr12	37108123	37108805	H3K27ac_34478	1.07769	3.97687	52.5076	9.79977e-08	2.85603e-06
chr5	121632744	121636107	H3K27ac_15109	1.24486	3.25876	52.4744	9.85524e-08	2.86608e-06
chr3	35618369	35623576	H3K27ac_7871	-1.03427	6.58205	52.8851	1.00795e-07	2.92729e-06
chr17	56272934	56274243	H3K27ac_45681	1.17537	3.86903	52.2069	1.03153e-07	2.99171e-06
chr1	74340694	74344556	H3K27ac_1204	1.15064	6.13664	56.5171	1.03714e-07	3.0039e-06
chr10	21073267	21076219	H3K27ac_27382	-1.24254	3.32845	52.1549	1.04074e-07	3.01023e-06
chr11	76687107	76689079	H3K27ac_31927	1.52209	2.57096	52.1193	1.04708e-07	3.02448e-06
chr14	55501768	55502909	H3K27ac_39039	1.26949	3.52916	51.9509	1.07771e-07	3.10875e-06
chr18	68193481	68195499	H3K27ac_47287	1.10301	3.58217	51.9198	1.08347e-07	3.12116e-06
chr6	48986478	48987852	H3K27ac_16712	1.06399	4.09654	51.7811	1.10958e-07	3.19206e-06
chr10	93534854	93536172	H3K27ac_28950	1.35764	2.46301	51.6789	1.12925e-07	3.24427e-06
chr19	36550892	36553776	H3K27ac_48651	1.12324	4.33743	51.65	1.13487e-07	3.25603e-06
chr3	88305901	88307236	H3K27ac_8697	1.07658	4.46171	51.5332	1.15793e-07	3.31775e-06
chr2	28389032	28389434	H3K27ac_4403	1.427	3.14586	51.5108	1.16241e-07	3.32612e-06
chr15	85907957	85910986	H3K27ac_41713	1.16159	3.95448	51.4807	1.16845e-07	3.33891e-06
chr4	150119793	150122029	H3K27ac_12884	1.03204	4.20071	51.4557	1.17351e-07	3.34342e-06
chr10	96094459	96098610	H3K27ac_29167	1.19135	4.16108	51.541	1.17429e-07	3.34342e-06
chr16	33690549	33692736	H3K27ac_42876	1.38595	2.86623	51.4497	1.17472e-07	3.34342e-06
chr1	35276356	35278380	H3K27ac_201	-1.72356	2.34459	52.9816	1.18372e-07	3.36007e-06
chr12	114104894	114105725	H3K27ac_35942	1.36504	2.36291	51.4098	1.18284e-07	3.36007e-06
chr1	69559100	69560883	H3K27ac_1093	1.36825	3.23627	51.3921	1.18645e-07	3.36334e-06
chr5	115762211	115764685	H3K27ac_14959	1.20989	4.20233	52.2712	1.19312e-07	3.37778e-06
chr19	11541193	11544860	H3K27ac_48118	1.34885	4.37142	55.546	1.20045e-07	3.394e-06
chr8	129136522	129141811	H3K27ac_23900	0.960999	6.18629	51.2977	1.20597e-07	3.40183e-06
chr11	87491056	87493194	H3K27ac_32371	1.53932	2.41528	51.2956	1.2064e-07	3.40183e-06
chr12	36762514	36763963	H3K27ac_34464	1.07711	3.80117	51.2348	1.21916e-07	3.43326e-06
chr16	32516013	32517735	H3K27ac_42803	1.12507	3.75468	51.2263	1.22094e-07	3.43376e-06
chr7	85881791	85883127	H3K27ac_20263	-2.15866	2.47277	54.5583	1.22986e-07	3.45429e-06
chr7	26490145	26494407	H3K27ac_19330	0.996931	6.08847	51.8038	1.2392e-07	3.47594e-06
chr17	5088321	5090878	H3K27ac_44095	-1.09327	5.01535	51.1108	1.24562e-07	3.48938e-06
chr9	58122863	58124415	H3K27ac_25185	1.48786	3.91087	55.8034	1.26296e-07	3.53332e-06
chr19	32461255	32464189	H3K27ac_48554	0.96425	6.12616	50.9183	1.28793e-07	3.59846e-06
chr13	44411667	44420355	H3K27ac_36854	0.835969	5.96857	50.8947	1.29322e-07	3.6085e-06
chr9	55949843	55954218	H3K27ac_25058	1.09946	5.53025	53.5376	1.30426e-07	3.63456e-06
chrX	12434433	12435782	H3K27ac_49256	1.45477	2.93476	50.7605	1.32376e-07	3.68409e-06
chr5	137429109	137429763	H3K27ac_15563	1.46907	2.21636	50.7123	1.33492e-07	3.7103e-06
chr9	43816232	43823310	H3K27ac_24664	0.854983	6.74014	50.6779	1.34296e-07	3.7278e-06
chr2	93257933	93273555	H3K27ac_5779	1.00481	7.94865	50.6565	1.34797e-07	3.73684e-06
chr4	14790932	14792149	H3K27ac_10520	0.896263	4.55829	50.5631	1.37012e-07	3.78841e-06
chr16	32740792	32742696	H3K27ac_42830	-1.43464	2.69975	50.5688	1.36876e-07	3.78841e-06
chr13	33084493	33086344	H3K27ac_36583	1.0634	3.705	50.4788	1.39044e-07	3.83963e-06
chr10	21711099	21715171	H3K27ac_27415	0.86488	6.64432	50.3327	1.42643e-07	3.93394e-06
chr4	124444946	124447208	H3K27ac_11970	1.13391	3.58794	50.239	1.45004e-07	3.99388e-06
chr6	82693872	82695374	H3K27ac_17172	1.46106	2.37733	50.2223	1.4543e-07	4.00044e-06
chr4	8849869	8851482	H3K27ac_10410	2.10488	2.43585	58.0517	1.46975e-07	4.03776e-06
chr3	20122926	20123625	H3K27ac_7706	-1.82994	1.9391	50.1041	1.48478e-07	4.0738e-06
chr15	59402744	59404124	H3K27ac_40816	1.42091	2.67232	50.0728	1.49297e-07	4.09099e-06
chr15	82171379	82173402	H3K27ac_41620	0.923815	5.37114	50.0512	1.49864e-07	4.10127e-06
chr4	86314119	86316328	H3K27ac_11325	1.20489	4.18175	50.68	1.51506e-07	4.14089e-06
chr8	125070767	125075585	H3K27ac_23735	0.884483	7.08417	49.8793	1.54467e-07	4.21642e-06
chr3	54202974	54204990	H3K27ac_8206	-2.01216	2.66242	49.857	1.55075e-07	4.22335e-06
chr6	42299110	42301317	H3K27ac_16617	0.78943	5.80806	49.8555	1.55116e-07	4.22335e-06
chr1	64351595	64352956	H3K27ac_1034	1.47177	3.36162	51.873	1.55753e-07	4.22989e-06
chr9	110585552	110589907	H3K27ac_26405	1.29766	6.44873	58.5187	1.55586e-07	4.22989e-06
chr5	138297586	138300714	H3K27ac_15604	1.57192	3.01783	52.0447	1.56003e-07	4.23132e-06
chr6	108656875	108660967	H3K27ac_17863	1.0212	4.97073	50.085	1.56666e-07	4.2439e-06
chr1	60622930	60623741	H3K27ac_924	1.00741	4.40893	49.7124	1.59081e-07	4.30386e-06
chr3	83644925	83645566	H3K27ac_8539	1.1918	2.98884	49.6594	1.6058e-07	4.3389e-06
chr2	154438246	154441777	H3K27ac_6829	0.923659	7.06037	49.6415	1.61088e-07	4.34394e-06
chr4	33018085	33020104	H3K27ac_10705	-1.32568	3.4138	49.6385	1.61173e-07	4.34394e-06
chr9	70738358	70740342	H3K27ac_25665	1.24891	3.02033	49.5662	1.63248e-07	4.3943e-06
chr16	29855593	29857782	H3K27ac_42683	2.12632	2.47731	58.2668	1.63464e-07	4.39458e-06
chr6	136912440	136917531	H3K27ac_18655	0.895195	5.83579	49.5178	1.6465e-07	4.41536e-06
chr11	98322240	98323763	H3K27ac_32739	1.04815	4.00933	49.5185	1.6463e-07	4.41536e-06
chr17	32250821	32251589	H3K27ac_44864	1.34569	3.03992	49.4795	1.65773e-07	4.43988e-06
chr5	107506454	107510534	H3K27ac_14638	1.09288	5.59176	49.3055	1.70966e-07	4.57322e-06
chr10	117088373	117089542	H3K27ac_29477	-1.48141	2.46259	49.2392	1.72991e-07	4.62161e-06
chr1	58359938	58361849	H3K27ac_821	-0.992583	4.39479	49.2053	1.74036e-07	4.6381e-06
chr7	87594202	87596163	H3K27ac_20348	1.03806	4.40779	49.2051	1.74043e-07	4.6381e-06
chr10	117084054	117085773	H3K27ac_29475	-1.34007	2.6004	49.1144	1.76876e-07	4.70772e-06
chr1	39769781	39772469	H3K27ac_356	1.00292	4.3798	49.0705	1.78264e-07	4.73875e-06
chr8	97951450	97953036	H3K27ac_23226	1.38225	3.06928	49.0474	1.78998e-07	4.75236e-06
chr11	77604926	77608010	H3K27ac_31971	0.814254	5.55531	49.0136	1.8008e-07	4.77513e-06
chr12	8852843	8854610	H3K27ac_34022	-1.30325	3.12616	48.9888	1.80877e-07	4.79032e-06
chr9	45079713	45081089	H3K27ac_24823	1.41086	2.17582	48.9632	1.81703e-07	4.80624e-06
chr5	149676851	149680779	H3K27ac_15945	-1.00573	6.80637	48.9216	1.83057e-07	4.83605e-06
chr3	97746164	97746743	H3K27ac_9050	1.63882	2.06758	49.4997	1.84255e-07	4.8617e-06
chr15	93426791	93427398	H3K27ac_41790	1.29232	2.55821	48.8662	1.84879e-07	4.87213e-06
chr17	29595931	29597665	H3K27ac_44723	0.986609	4.05715	48.8493	1.85436e-07	4.87477e-06
chrX	34634899	34636427	H3K27ac_49361	-1.48945	2.66118	48.856	1.85216e-07	4.87477e-06
chr1	36613330	36613912	H3K27ac_239	1.26948	2.70472	48.8218	1.86349e-07	4.88673e-06
chr3	37646206	37648041	H3K27ac_7949	1.09928	3.54633	48.825	1.86244e-07	4.88673e-06
chr2	59856494	59858427	H3K27ac_5047	-1.01746	4.89388	48.8067	1.86853e-07	4.89393e-06
chr2	18835328	18843771	H3K27ac_4180	0.972985	6.47274	48.7967	1.87189e-07	4.89673e-06
chr3	65725385	65727640	H3K27ac_8374	-1.72219	2.57009	51.2745	1.88172e-07	4.91643e-06
chr16	29864773	29866026	H3K27ac_42684	1.27063	2.38759	48.6867	1.9091e-07	4.97577e-06
chr19	3905036	3907332	H3K27ac_47765	0.972927	4.52454	48.6919	1.90732e-07	4.97577e-06
chr1	74344638	74347146	H3K27ac_1205	1.07679	3.63083	48.6335	1.92737e-07	5.00508e-06
chr9	69304256	69308130	H3K27ac_25600	0.928914	5.13285	48.635	1.92684e-07	5.00508e-06
chr12	17721284	17725323	H3K27ac_34180	1.101	5.16718	50.8986	1.9257e-07	5.00508e-06
chr18	82644532	82651337	H3K27ac_47630	0.839118	7.1492	48.6185	1.93256e-07	5.01245e-06
chr16	23982508	23983899	H3K27ac_42614	1.20183	3.27667	48.4328	1.99804e-07	5.17599e-06
chr3	52421320	52427187	H3K27ac_8147	-1.22389	6.0673	52.8711	2.01431e-07	5.21181e-06
chr9	50308187	50309580	H3K27ac_24939	1.40475	2.33488	48.3506	2.02778e-07	5.24031e-06
chr15	82016114	82019320	H3K27ac_41616	-0.989549	5.83535	48.5238	2.03119e-07	5.24277e-06
chr6	133984795	133987716	H3K27ac_18439	0.842547	7.19067	48.3311	2.03492e-07	5.24407e-06
chr10	76673168	76675655	H3K27ac_28468	1.8872	3.81651	62.0528	2.03906e-07	5.24407e-06
chr11	32002398	32005941	H3K27ac_30570	-1.04649	3.80963	48.3221	2.03821e-07	5.24407e-06
chr15	76406772	76410484	H3K27ac_41256	1.11047	6.01078	52.1934	2.0541e-07	5.27005e-06
chr16	30186009	30189179	H3K27ac_42686	0.985538	5.76567	49.1034	2.05291e-07	5.27005e-06
chr16	11077597	11079519	H3K27ac_42350	1.23535	3.40839	48.124	2.11228e-07	5.41282e-06
chr13	55117456	55122745	H3K27ac_37240	-1.08279	5.45292	48.0959	2.12302e-07	5.43382e-06
chr12	17696137	17696960	H3K27ac_34171	1.36054	2.39604	48.0857	2.12694e-07	5.43732e-06
chr5	91567564	91569200	H3K27ac_14249	-1.27259	3.979	49.7113	2.13872e-07	5.46091e-06
chr15	83262619	83264127	H3K27ac_41653	1.41451	2.38764	48.038	2.14534e-07	5.47126e-06
chr15	74503287	74503860	H3K27ac_41179	1.28393	2.62131	48.0086	2.15676e-07	5.49381e-06
chr8	10994033	10996667	H3K27ac_21971	1.09698	3.68515	47.9913	2.1635e-07	5.50443e-06
chr8	131208844	131210595	H3K27ac_24031	0.910231	6.14637	47.9674	2.17288e-07	5.52171e-06
chr9	21261032	21262223	H3K27ac_24330	1.37772	2.42857	47.9371	2.18482e-07	5.54543e-06
chr5	37103537	37104838	H3K27ac_13572	1.34396	3.3234	48.0558	2.19061e-07	5.55355e-06
chr11	70325231	70327995	H3K27ac_31672	1.06147	4.36264	47.9082	2.19626e-07	5.56124e-06
chr13	43398098	43399636	H3K27ac_36796	0.881106	5.46847	47.8978	2.20039e-07	5.56512e-06
chr3	95511178	95513907	H3K27ac_8940	1.09881	3.46916	47.8893	2.20381e-07	5.56716e-06
chr15	66989415	66995311	H3K27ac_41105	1.13626	4.10283	47.8207	2.23133e-07	5.63003e-06
chr4	132633612	132636641	H3K27ac_12286	0.891492	5.8037	47.7712	2.25145e-07	5.67408e-06
chr12	35244588	35245910	H3K27ac_34412	-1.44387	2.57387	47.7362	2.26579e-07	5.70347e-06
chr1	182845414	182847980	H3K27ac_3415	-1.15041	4.07197	47.721	2.27206e-07	5.71253e-06
chr6	125201983	125203592	H3K27ac_18289	-1.33583	2.75839	47.6779	2.28992e-07	5.75065e-06
chr7	35769302	35771203	H3K27ac_19541	1.09876	3.75944	47.6596	2.29751e-07	5.76293e-06
chr3	51592420	51594347	H3K27ac_8056	1.52259	3.4491	51.1826	2.30887e-07	5.78464e-06
chr1	195246579	195249927	H3K27ac_3703	-1.53601	4.03528	48.3764	2.32105e-07	5.80835e-06
chr19	25151089	25154027	H3K27ac_48341	1.06593	3.91931	47.5886	2.32737e-07	5.81733e-06
chr15	78259320	78260304	H3K27ac_41339	1.23591	2.97416	47.5596	2.33965e-07	5.84119e-06
chr2	4479843	4481697	H3K27ac_3770	1.21614	3.64645	47.5152	2.35861e-07	5.88165e-06
chr1	184031692	184034777	H3K27ac_3451	1.43175	2.8784	47.6429	2.37122e-07	5.90619e-06
chr8	109495953	109499233	H3K27ac_23358	1.20756	3.69245	47.4488	2.38733e-07	5.9394e-06
chr5	87221391	87224033	H3K27ac_14204	-1.30463	2.33626	47.4181	2.40072e-07	5.96575e-06
chr8	129149235	129153800	H3K27ac_23903	1.01948	5.16756	47.4078	2.40523e-07	5.97e-06
chr4	128410541	128413586	H3K27ac_12062	0.891048	4.42994	47.3802	2.41735e-07	5.98617e-06
chr17	32244493	32247973	H3K27ac_44863	1.42326	5.06298	58.5127	2.41461e-07	5.98617e-06
chr10	94653873	94659249	H3K27ac_29004	1.26263	4.76754	53.0758	2.44771e-07	6.05433e-06
chr2	131735708	131736119	H3K27ac_6490	1.10761	3.59526	47.1761	2.50909e-07	6.17856e-06
chr6	98976829	98979198	H3K27ac_17599	0.830267	7.16018	47.1752	2.50952e-07	6.17856e-06
chr10	80845088	80845559	H3K27ac_28657	1.65773	2.26677	48.5391	2.50892e-07	6.17856e-06
chr13	41757547	41758541	H3K27ac_36738	1.30721	2.33292	47.1867	2.50427e-07	6.17856e-06
chr11	97880496	97882379	H3K27ac_32725	0.935052	4.41275	47.156	2.51836e-07	6.1932e-06
chr7	148137122	148143795	H3K27ac_21756	1.88477	6.83207	72.1641	2.52507e-07	6.20235e-06
chr10	66567251	66568933	H3K27ac_28194	1.40006	2.63625	47.1353	2.5279e-07	6.20235e-06
chr14	122221124	122225571	H3K27ac_40076	1.16505	4.52946	49.2299	2.5485e-07	6.24574e-06
chr4	129177673	129178575	H3K27ac_12102	0.99299	4.15649	47.0404	2.57222e-07	6.29663e-06
chr4	130459658	130462072	H3K27ac_12187	1.42016	3.8294	50.3672	2.63485e-07	6.44256e-06
chr14	79579625	79581120	H3K27ac_39775	1.40306	2.58094	46.8848	2.64666e-07	6.46402e-06
chr19	29222943	29225359	H3K27ac_48374	1.22234	2.97254	46.8433	2.66689e-07	6.50599e-06
chr8	109971599	109974550	H3K27ac_23377	-1.29659	3.64212	47.582	2.68675e-07	6.54696e-06
chr18	80818867	80822666	H3K27ac_47557	1.05406	4.12648	46.7875	2.69437e-07	6.5547e-06
chr19	4133851	4137139	H3K27ac_47782	0.802889	5.84666	46.7841	2.69607e-07	6.5547e-06
chr18	81051626	81053009	H3K27ac_47589	2.11316	2.52948	56.6555	2.70933e-07	6.57945e-06
chr1	193960710	193962559	H3K27ac_3664	0.807244	5.47343	46.7055	2.73534e-07	6.63506e-06
chr3	51505465	51506205	H3K27ac_8044	1.52034	2.99264	48.3935	2.74647e-07	6.6545e-06
chr1	140400669	140402235	H3K27ac_2362	1.58852	2.83232	48.9152	2.75802e-07	6.66735e-06
chr11	50037930	50040327	H3K27ac_30930	1.01857	5.29605	48.0344	2.75725e-07	6.66735e-06
chr2	170168496	170172262	H3K27ac_7415	1.66396	4.94381	63.1115	2.76136e-07	6.66788e-06
chr5	134703128	134715769	H3K27ac_15450	-0.923897	8.33114	46.6209	2.77828e-07	6.70116e-06
chr1	137179700	137180625	H3K27ac_2247	0.90009	4.52058	46.6111	2.78333e-07	6.70279e-06
chr6	124849460	124852899	H3K27ac_18257	0.896704	5.3386	46.6073	2.78524e-07	6.70279e-06
chr6	120966364	120968639	H3K27ac_18147	0.899562	5.01191	46.5826	2.79795e-07	6.7258e-06
chr10	75243474	75244233	H3K27ac_28436	1.23639	2.84028	46.5556	2.81194e-07	6.75183e-06
chr17	71539519	71542416	H3K27ac_45858	1.20807	3.59536	46.5405	2.81976e-07	6.76298e-06
chr9	44525042	44525743	H3K27ac_24754	1.57295	2.19133	47.0652	2.85471e-07	6.83913e-06
chr14	119079914	119082995	H3K27ac_39963	1.0713	3.87011	46.4231	2.88155e-07	6.89569e-06
chr2	62483329	62484876	H3K27ac_5141	0.803192	5.21552	46.3737	2.908e-07	6.92792e-06
chr8	125098482	125100779	H3K27ac_23740	0.970383	4.75053	46.3741	2.90777e-07	6.92792e-06
chr17	31925452	31927811	H3K27ac_44844	0.904815	4.83453	46.3845	2.9022e-07	6.92792e-06
chr19	10789081	10791310	H3K27ac_48042	0.888742	4.44359	46.3753	2.90715e-07	6.92792e-06
chr11	75280976	75281777	H3K27ac_31820	1.4196	2.26782	46.3672	2.91148e-07	6.92848e-06
chr5	52503396	52504431	H3K27ac_13638	1.08043	3.57066	46.3561	2.91749e-07	6.93504e-06
chr7	87219366	87220976	H3K27ac_20303	1.01276	3.77239	46.3392	2.92659e-07	6.94895e-06
chr19	53581611	53582965	H3K27ac_49000	1.13836	3.44971	46.3132	2.9407e-07	6.97468e-06
chr11	75966473	75968659	H3K27ac_31883	1.50086	2.70634	46.9033	3.00108e-07	7.11e-06
chr8	84377699	84381081	H3K27ac_22921	0.89459	5.74552	46.1789	3.01479e-07	7.12665e-06
chr9	14727561	14732902	H3K27ac_24209	-1.08817	5.16371	48.1334	3.01335e-07	7.12665e-06
chr4	124380423	124383042	H3K27ac_11961	1.02109	4.87089	46.7248	3.0215e-07	7.13461e-06
chr6	134136256	134137515	H3K27ac_18489	1.42852	2.14498	46.0995	3.05954e-07	7.21647e-06
chr11	77310388	77311312	H3K27ac_31960	1.35198	2.87953	46.0409	3.093e-07	7.28733e-06
chr3	67266927	67268133	H3K27ac_8386	1.04277	3.65539	46.0325	3.09784e-07	7.29069e-06
chr3	69177479	69178882	H3K27ac_8472	-1.29526	2.70207	46.0193	3.10543e-07	7.3005e-06
chr5	101036043	101038952	H3K27ac_14422	1.35999	3.70786	48.3815	3.15616e-07	7.40584e-06
chr18	50145485	50147240	H3K27ac_46928	0.92431	4.58085	45.9304	3.15718e-07	7.40584e-06
chr9	106377502	106379260	H3K27ac_26241	0.831839	4.53308	45.7898	3.241e-07	7.59411e-06
chr18	75582894	75587229	H3K27ac_47458	-0.895412	5.91898	45.6995	3.29606e-07	7.71466e-06
chr17	48061848	48062819	H3K27ac_45408	0.904852	4.33442	45.6847	3.30515e-07	7.72746e-06
chr15	66675573	66678106	H3K27ac_41071	1.23619	3.01851	45.675	3.31115e-07	7.73301e-06
chr16	89985419	89987936	H3K27ac_43745	0.941618	5.00975	45.6406	3.33249e-07	7.77434e-06
chr1	129119585	129123127	H3K27ac_1919	1.37804	2.9193	45.6294	3.33946e-07	7.78211e-06
chr1	88399690	88402273	H3K27ac_1477	0.75376	6.27034	45.6124	3.35011e-07	7.78755e-06
chr1	108580591	108581760	H3K27ac_1825	1.23633	2.47704	45.6016	3.35685e-07	7.78755e-06
chr1	182874874	182875997	H3K27ac_3420	1.45974	2.62311	45.6161	3.3478e-07	7.78755e-06
chr9	57858943	57861616	H3K27ac_25158	3.65032	3.04826	80.1342	3.36278e-07	7.78755e-06
chr10	12587095	12589468	H3K27ac_27045	0.879406	5.88671	45.5908	3.36368e-07	7.78755e-06
chr15	85989985	85992633	H3K27ac_41720	1.04396	4.21023	45.5938	3.36174e-07	7.78755e-06
chr2	70396047	70397760	H3K27ac_5251	-1.10097	4.08792	45.5132	3.41284e-07	7.89279e-06
chr7	87551486	87551992	H3K27ac_20344	1.33643	2.3957	45.495	3.4245e-07	7.91118e-06
chr11	78935617	78937602	H3K27ac_32045	1.10904	3.89536	45.4712	3.43977e-07	7.93788e-06
chr15	61970055	61971658	H3K27ac_40906	1.47188	2.60937	45.4645	3.44411e-07	7.93931e-06
chr11	68007625	68010496	H3K27ac_31545	1.46082	3.85566	50.8566	3.4499e-07	7.94408e-06
chr9	119242995	119244149	H3K27ac_26667	1.59116	2.31468	46.3803	3.47437e-07	7.99179e-06
chrX	71192121	71195265	H3K27ac_49563	1.10741	4.49393	46.7064	3.48796e-07	8.01442e-06
chr6	114726949	114729074	H3K27ac_17941	1.0077	3.99344	45.3909	3.49197e-07	8.015e-06
chr18	4348861	4354730	H3K27ac_46429	0.731171	6.43207	45.3489	3.51954e-07	8.06961e-06
chr13	46000949	46004433	H3K27ac_36954	1.03115	5.1642	47.208	3.52836e-07	8.08115e-06
chr4	8833048	8835157	H3K27ac_10405	1.8839	3.39761	55.594	3.54096e-07	8.10131e-06
chr3	68673122	68674631	H3K27ac_8405	1.03847	5.04305	46.2174	3.55136e-07	8.11642e-06
chr9	110583532	110585085	H3K27ac_26404	1.50642	2.6446	46.1741	3.57942e-07	8.16483e-06
chr14	26283893	26285392	H3K27ac_38499	1.41293	3.10088	46.1714	3.5802e-07	8.16483e-06
chr4	57313348	57314668	H3K27ac_11058	1.03948	3.79322	45.2278	3.60054e-07	8.20246e-06
chr2	31314419	31316760	H3K27ac_4576	-0.910097	5.03053	45.1435	3.65804e-07	8.32457e-06
chr5	151413261	151417724	H3K27ac_15990	0.821408	5.79052	45.1304	3.6671e-07	8.3363e-06
chr13	33094168	33098209	H3K27ac_36586	0.86602	5.88303	45.0835	3.69958e-07	8.40119e-06
chr7	148210415	148213318	H3K27ac_21783	1.44524	3.31051	47.2483	3.71716e-07	8.43214e-06
chr15	53176303	53177788	H3K27ac_40674	0.843508	4.64938	45.0487	3.72392e-07	8.43851e-06
chr7	26170595	26172580	H3K27ac_19316	0.987593	4.42176	45.0212	3.74328e-07	8.47339e-06
chr2	18849168	18851642	H3K27ac_4184	0.840186	5.10581	44.9409	3.80038e-07	8.59088e-06
chr9	61666915	61669299	H3K27ac_25255	-1.17045	2.87355	44.937	3.80324e-07	8.59088e-06
chr10	55834642	55835748	H3K27ac_27961	0.976458	4.89885	44.9693	3.80823e-07	8.59308e-06
chr10	80709750	80712405	H3K27ac_28640	-0.953571	6.80492	45.281	3.81403e-07	8.59706e-06
chr2	52194667	52198643	H3K27ac_4942	-1.12342	4.03486	44.9247	3.89002e-07	8.75912e-06
chr17	33915911	33917606	H3K27ac_44938	1.97328	2.89994	53.3831	3.91558e-07	8.80737e-06
chr7	16586309	16589403	H3K27ac_19099	1.07836	4.07724	44.6761	3.99556e-07	8.97782e-06
chr2	30479413	30483243	H3K27ac_4500	-0.861804	6.79386	44.6626	4.0058e-07	8.98214e-06
chr7	148202540	148204278	H3K27ac_21780	1.2879	2.62404	44.6569	4.01011e-07	8.98214e-06
chr11	106423338	106427227	H3K27ac_33171	0.819659	4.97113	44.6597	4.00798e-07	8.98214e-06
chr9	114375306	114378263	H3K27ac_26483	1.29212	4.37096	49.6451	4.05458e-07	9.07223e-06
chr7	29586828	29588855	H3K27ac_19417	0.970085	4.38977	44.5671	4.07895e-07	9.11721e-06
chr9	64075433	64076655	H3K27ac_25357	1.44619	2.16447	44.515	4.11948e-07	9.19816e-06
chr2	32281717	32285045	H3K27ac_4630	1.01993	4.26763	44.5032	4.12872e-07	9.20916e-06
chr1	135693939	135698554	H3K27ac_2205	0.860284	6.53241	44.4649	4.15894e-07	9.26688e-06
chr5	53979603	53983216	H3K27ac_13712	0.821028	7.80348	44.4243	4.19117e-07	9.30504e-06
chr12	113866578	113868149	H3K27ac_35923	0.991437	3.60668	44.4289	4.18743e-07	9.30504e-06
chr15	25552343	25553047	H3K27ac_40344	1.17575	3.21898	44.4296	4.18691e-07	9.30504e-06
chr15	98862380	98863561	H3K27ac_41983	1.31768	2.93707	44.4213	4.1935e-07	9.30504e-06
chr4	8852312	8856985	H3K27ac_10411	0.880895	6.38715	44.4001	4.21044e-07	9.32381e-06
chr12	70353314	70362621	H3K27ac_34685	-1.23414	6.76743	49.5545	4.21507e-07	9.32381e-06
chr16	90196836	90198941	H3K27ac_43749	0.910519	5.09645	44.397	4.21297e-07	9.32381e-06
chr14	79713316	79716912	H3K27ac_39793	-1.05147	5.27353	44.3877	4.22042e-07	9.32599e-06
chr5	73147300	73151846	H3K27ac_14030	0.946377	4.54614	44.3732	4.23206e-07	9.34204e-06
chr3	94394493	94396018	H3K27ac_8865	-1.32231	2.67254	44.3587	4.24376e-07	9.34853e-06
chr15	76036866	76038812	H3K27ac_41232	0.952801	4.88114	44.3622	4.24092e-07	9.34853e-06
chr2	102738902	102742189	H3K27ac_5856	0.766643	6.24001	44.3442	4.25551e-07	9.36475e-06
chr5	92917430	92921415	H3K27ac_14292	-0.990637	4.21211	44.2787	4.30889e-07	9.47246e-06
chr12	81060345	81061843	H3K27ac_35139	1.30225	2.45759	44.2376	4.34281e-07	9.53719e-06
chr13	70882507	70886453	H3K27ac_37475	-1.11451	3.69134	44.2035	4.37117e-07	9.58962e-06
chr5	101064079	101068553	H3K27ac_14428	0.908303	5.91931	44.3065	4.38214e-07	9.60381e-06
chr6	22360467	22364211	H3K27ac_16156	-1.32012	3.64668	44.1556	4.41128e-07	9.63848e-06
chr9	21039507	21040970	H3K27ac_24309	1.02301	4.44924	44.1553	4.4115e-07	9.63848e-06
chr17	5975015	5978835	H3K27ac_44124	0.805547	7.28391	44.1606	4.40709e-07	9.63848e-06
chr2	9280599	9282369	H3K27ac_3931	-1.43682	3.24039	45.9387	4.43064e-07	9.67039e-06
chr3	135302064	135305201	H3K27ac_9837	0.958409	4.80565	44.1111	4.44891e-07	9.70036e-06
chr6	124866110	124867339	H3K27ac_18262	1.07346	4.30467	44.1995	4.46282e-07	9.72076e-06
chr1	36828475	36830067	H3K27ac_248	1.08489	3.41737	44.0454	4.50508e-07	9.8028e-06
chr13	34056299	34058141	H3K27ac_36592	1.04086	3.892	44.014	4.53222e-07	9.85181e-06
chr2	152827911	152829063	H3K27ac_6772	1.25974	2.66954	43.9848	4.55763e-07	9.89697e-06
chr9	7828929	7830723	H3K27ac_24086	0.925431	4.22557	43.938	4.59868e-07	9.97595e-06
chr5	8424826	8426729	H3K27ac_13121	-1.61938	3.8921	49.1577	4.64865e-07	1.00741e-05
chr3	107561519	107563977	H3K27ac_9378	0.897352	4.8517	43.8535	4.67369e-07	1.01181e-05
chr11	57829335	57833147	H3K27ac_31297	0.996452	4.20497	43.8115	4.71152e-07	1.01897e-05
chr11	116943072	116944734	H3K27ac_33664	1.173	3.35572	43.796	4.72559e-07	1.02098e-05
chr10	39872102	39873926	H3K27ac_27686	1.87046	2.2058	46.771	4.73918e-07	1.02215e-05
chr14	66858465	66864225	H3K27ac_39394	0.83381	4.7269	43.7795	4.74059e-07	1.02215e-05
chr7	104230296	104230851	H3K27ac_20608	1.29836	3.4111	44.418	4.76881e-07	1.0272e-05
chr4	107980717	107984794	H3K27ac_11677	-1.10347	4.51021	43.7079	4.80618e-07	1.03316e-05
chr9	114384078	114387838	H3K27ac_26486	1.23258	5.03393	49.9168	4.8015e-07	1.03316e-05
chr4	149055018	149060557	H3K27ac_12820	0.976249	4.50204	43.6635	4.84737e-07	1.04096e-05
chr16	27388671	27391118	H3K27ac_42672	0.82434	5.09637	43.6203	4.88782e-07	1.0486e-05
chr1	43537794	43540254	H3K27ac_484	1.50781	2.5682	44.5411	4.91112e-07	1.04956e-05
chr9	122037198	122041028	H3K27ac_26767	-1.35804	4.55292	49.0668	4.8997e-07	1.04956e-05
chr12	33832555	33836615	H3K27ac_34381	0.792486	5.80751	43.5949	4.91174e-07	1.04956e-05
chr17	56083622	56085602	H3K27ac_45669	0.74944	6.56638	43.5947	4.91199e-07	1.04956e-05
chr5	23866437	23867661	H3K27ac_13271	1.26696	2.77068	43.5512	4.9533e-07	1.05733e-05
chr7	90764410	90766152	H3K27ac_20470	1.25909	2.88457	43.4735	5.02798e-07	1.0722e-05
chr15	100248142	100248974	H3K27ac_42060	1.45028	2.19879	43.4655	5.03575e-07	1.07279e-05
chr2	118571430	118572797	H3K27ac_6081	0.94559	4.24463	43.4044	5.09544e-07	1.08442e-05
chr11	78953249	78960012	H3K27ac_32050	0.955567	6.24922	44.5987	5.11277e-07	1.08594e-05
chr15	6472620	6474256	H3K27ac_40187	0.931097	4.66723	43.3905	5.10914e-07	1.08594e-05
chr14	66875638	66880723	H3K27ac_39398	0.769382	5.7121	43.365	5.13435e-07	1.08918e-05
chr16	10980995	10982797	H3K27ac_42340	1.35942	2.38097	43.3611	5.13824e-07	1.08918e-05
chr2	35359003	35360403	H3K27ac_4790	1.44918	2.30837	43.2856	5.2138e-07	1.10209e-05
chr10	69594590	69597389	H3K27ac_28357	1.92473	3.15755	52.7657	5.20752e-07	1.10209e-05
chr17	27498620	27503036	H3K27ac_44573	1.1508	4.67092	46.2165	5.21463e-07	1.10209e-05
chr19	10912892	10914589	H3K27ac_48069	1.07262	3.55076	43.2766	5.22283e-07	1.10273e-05
chr8	131173279	131175373	H3K27ac_24028	1.40731	2.58592	43.4617	5.2822e-07	1.11417e-05
chrX	106314189	106317861	H3K27ac_49826	0.870043	4.7085	43.1461	5.35645e-07	1.12871e-05
chr13	52997978	53001018	H3K27ac_37194	1.79402	4.76422	61.4449	5.37602e-07	1.13172e-05
chr12	16900808	16902451	H3K27ac_34115	0.819192	6.12115	43.0974	5.40729e-07	1.13687e-05
chr15	61815664	61820177	H3K27ac_40886	0.891047	7.12995	43.0937	5.41111e-07	1.13687e-05
chr10	66577074	66578990	H3K27ac_28197	1.237	3.09161	43.0306	5.4778e-07	1.14749e-05
chr11	78941459	78950468	H3K27ac_32049	1.20411	7.44219	49.0132	5.47334e-07	1.14749e-05
chr11	109582459	109582886	H3K27ac_33443	1.20561	2.66799	43.032	5.4763e-07	1.14749e-05
chr3	87951873	87956405	H3K27ac_8682	0.834707	5.70445	43.0242	5.48457e-07	1.14778e-05
chr5	74798062	74802115	H3K27ac_14106	-0.855406	4.8822	42.9886	5.52258e-07	1.1546e-05
chr9	31090189	31092223	H3K27ac_24420	-1.28391	3.27331	43.1446	5.53116e-07	1.15527e-05
chr19	34578072	34580753	H3K27ac_48609	-1.55051	3.54878	47.4485	5.55367e-07	1.15883e-05
chr4	107989456	107993553	H3K27ac_11681	-0.910795	7.31185	42.9212	5.59543e-07	1.16641e-05
chr10	110943489	110945361	H3K27ac_29365	0.807031	6.40076	42.9034	5.61486e-07	1.16931e-05
chr19	29302095	29303248	H3K27ac_48389	1.33131	2.68006	42.8768	5.64392e-07	1.17422e-05
chr1	39956945	39960400	H3K27ac_369	0.901951	7.64073	42.8662	5.6556e-07	1.1755e-05
chr10	77861745	77863329	H3K27ac_28522	-1.26584	3.5045	42.7408	5.79537e-07	1.20339e-05
chr2	34871028	34872171	H3K27ac_4745	1.26739	2.39641	42.7264	5.81164e-07	1.20559e-05
chr8	131213613	131214669	H3K27ac_24033	1.35354	2.29931	42.6813	5.86299e-07	1.21506e-05
chr3	142248562	142251508	H3K27ac_10032	-1.25901	4.10816	45.5968	5.92768e-07	1.22728e-05
chr11	75849634	75854795	H3K27ac_31878	-1.39105	6.2753	48.5187	5.93474e-07	1.22755e-05
chr9	92123920	92125360	H3K27ac_26007	1.04759	3.66576	42.5887	5.97001e-07	1.23365e-05
chr18	65535097	65536512	H3K27ac_47185	1.37014	2.817	42.6566	6.00537e-07	1.23976e-05
chr6	116623949	116624736	H3K27ac_18027	1.27882	2.12648	42.5433	6.02325e-07	1.24224e-05
chr18	82661613	82662563	H3K27ac_47636	1.35115	1.83634	42.4962	6.07893e-07	1.25252e-05
chr6	114836601	114837711	H3K27ac_17961	1.2409	2.55711	42.4751	6.10413e-07	1.2565e-05
chr9	114363771	114367202	H3K27ac_26480	1.10164	3.9814	42.5482	6.13407e-07	1.26144e-05
chr2	167182972	167186068	H3K27ac_7271	1.18929	4.83938	47.4011	6.16304e-07	1.26606e-05
chr5	151025357	151026926	H3K27ac_15982	-1.07587	3.76644	42.4216	6.1684e-07	1.26606e-05
chr8	119680427	119682549	H3K27ac_23606	0.762216	6.15546	42.3991	6.19556e-07	1.27018e-05
chr13	98672136	98673799	H3K27ac_37810	1.35168	2.65101	42.3952	6.20035e-07	1.27018e-05
chr14	20987073	20989243	H3K27ac_38408	1.31391	2.55356	42.3853	6.21233e-07	1.27141e-05
chr6	134064656	134067803	H3K27ac_18464	1.66739	3.49757	49.5108	6.22148e-07	1.27207e-05
chr9	50277773	50279904	H3K27ac_24935	1.36153	3.22671	42.4444	6.25684e-07	1.27807e-05
chr6	108653920	108656381	H3K27ac_17862	1.11108	4.14197	43.1302	6.29774e-07	1.2852e-05
chr11	57386650	57388177	H3K27ac_31274	1.22683	2.67867	42.298	6.31961e-07	1.28843e-05
chr2	137049554	137051808	H3K27ac_6567	-1.32002	2.46291	42.2727	6.35104e-07	1.2936e-05
chr19	10028684	10029799	H3K27ac_48026	1.22734	2.47523	42.2515	6.37755e-07	1.29776e-05
chr9	63524791	63527598	H3K27ac_25328	1.80603	2.96962	48.7826	6.4266e-07	1.3065e-05
chr14	8927804	8928663	H3K27ac_38297	1.33454	2.45428	42.1682	6.48283e-07	1.31667e-05
chr18	75577732	75581028	H3K27ac_47457	-1.03288	4.83106	42.1599	6.49341e-07	1.31757e-05
chr2	93054010	93055317	H3K27ac_5773	1.1624	3.42297	42.124	6.53941e-07	1.32564e-05
chr1	39790706	39793817	H3K27ac_357	1.11048	4.33308	42.6378	6.55411e-07	1.32736e-05
chr9	69301465	69303786	H3K27ac_25599	0.849662	5.84049	42.0777	6.59934e-07	1.33526e-05
chr15	78897346	78899265	H3K27ac_41391	1.14757	3.34379	42.0564	6.627e-07	1.33958e-05
chr11	102293109	102294154	H3K27ac_32994	1.16839	2.81777	41.9956	6.70689e-07	1.35445e-05
chr7	134739060	134740363	H3K27ac_21477	1.32373	2.31651	41.9696	6.74135e-07	1.36012e-05
chr11	54940921	54942409	H3K27ac_31252	1.14926	2.84071	41.9571	6.75803e-07	1.36121e-05
chr17	33691172	33696687	H3K27ac_44926	-0.877789	4.71012	41.956	6.75951e-07	1.36121e-05
chr3	9249681	9251049	H3K27ac_7608	-0.958305	5.04667	41.9251	6.80082e-07	1.36695e-05
chr8	35107889	35111352	H3K27ac_22241	-1.04604	4.1049	41.9285	6.79623e-07	1.36695e-05
chr11	117847922	117857975	H3K27ac_33723	1.04486	7.20667	44.6878	6.8148e-07	1.36847e-05
chr12	17557822	17561579	H3K27ac_34167	0.853769	4.69257	41.8207	6.94242e-07	1.39279e-05
chr9	111019371	111021829	H3K27ac_26432	0.791023	5.89458	41.7719	7.00977e-07	1.40498e-05
chr2	173099926	173102057	H3K27ac_7454	0.842396	5.59232	41.7481	7.0429e-07	1.4103e-05
chr2	167143902	167144877	H3K27ac_7257	1.35406	2.21548	41.7154	7.08854e-07	1.41811e-05
chr15	59449634	59452614	H3K27ac_40824	0.769742	5.70676	41.7049	7.10334e-07	1.41974e-05
chr12	86915074	86916772	H3K27ac_35339	1.80086	2.52968	47.2242	7.12473e-07	1.42147e-05
chr16	38451493	38453438	H3K27ac_43002	0.813079	5.71118	41.6893	7.12535e-07	1.42147e-05
chr2	158498112	158501309	H3K27ac_6993	0.771987	4.75703	41.6306	7.20861e-07	1.43422e-05
chr3	97733022	97742966	H3K27ac_9048	1.10221	6.62542	46.4425	7.20879e-07	1.43422e-05
chr16	10753689	10756828	H3K27ac_42322	1.32786	3.82461	44.8118	7.20939e-07	1.43422e-05
chr15	83053504	83055203	H3K27ac_41648	2.4206	2.61125	55.7623	7.23686e-07	1.43834e-05
chr15	72758738	72760421	H3K27ac_41134	-1.05929	3.26532	41.5765	7.28643e-07	1.44685e-05
chr1	20880711	20881393	H3K27ac_87	1.04872	3.44357	41.5592	7.31136e-07	1.44914e-05
chr3	79055590	79058679	H3K27ac_8517	-0.80841	5.02011	41.5498	7.32511e-07	1.44914e-05
chr11	78889085	78891003	H3K27ac_32039	0.992501	3.75455	41.5514	7.32273e-07	1.44914e-05
chr13	36826542	36827007	H3K27ac_36634	1.21826	2.45631	41.5534	7.31984e-07	1.44914e-05
chr3	88428258	88429432	H3K27ac_8708	1.35544	2.72448	41.5125	7.38955e-07	1.46053e-05
chr7	90787571	90789415	H3K27ac_20474	1.06471	3.17212	41.4962	7.4035e-07	1.46193e-05
chr13	13630049	13631942	H3K27ac_36192	1.07779	3.66794	41.4474	7.47556e-07	1.4748e-05
chr10	39331946	39334735	H3K27ac_27658	0.761017	6.66915	41.4365	7.49179e-07	1.47664e-05
chr2	173205160	173206674	H3K27ac_7460	1.07429	3.17493	41.3944	7.5548e-07	1.48768e-05
chr2	119828318	119829955	H3K27ac_6120	-1.26028	3.0786	41.3654	7.59843e-07	1.49234e-05
chr2	125616272	125619091	H3K27ac_6250	0.890218	5.02378	41.3668	7.59636e-07	1.49234e-05
chr18	32716889	32720691	H3K27ac_46629	0.781725	7.00297	41.3648	7.59945e-07	1.49234e-05
chr5	64750893	64752581	H3K27ac_13810	1.25855	3.44425	42.133	7.62347e-07	1.49568e-05
chr17	47405475	47406877	H3K27ac_45365	-0.91182	4.01764	41.2817	7.72625e-07	1.51446e-05
chr7	121433266	121437798	H3K27ac_21082	-1.14771	5.48267	41.7357	7.76103e-07	1.51988e-05
chr5	106159886	106162647	H3K27ac_14597	0.728536	6.20087	41.2032	7.8481e-07	1.53552e-05
chr17	36980167	36983529	H3K27ac_45170	1.28562	3.03705	41.198	7.8563e-07	1.53572e-05
chr6	97259595	97262908	H3K27ac_17550	0.800031	6.02385	41.1809	7.88312e-07	1.53814e-05
chr18	82653620	82655278	H3K27ac_47632	1.08658	3.2753	41.1816	7.88194e-07	1.53814e-05
chr5	134728489	134730003	H3K27ac_15453	-1.33543	2.49933	41.1656	7.90711e-07	1.54142e-05
chr12	40860413	40861168	H3K27ac_34496	1.12125	3.10732	41.0924	8.02369e-07	1.56272e-05
chr8	123222974	123226695	H3K27ac_23687	0.826684	5.2894	41.0569	8.0807e-07	1.57239e-05
chr12	77652392	77656116	H3K27ac_34955	2.03907	3.67753	56.3421	8.12323e-07	1.57922e-05
chr8	84384284	84386108	H3K27ac_22925	1.32626	2.73602	40.9947	8.18198e-07	1.5892e-05
chr14	62267730	62268411	H3K27ac_39244	0.766524	4.88169	40.9788	8.20802e-07	1.5928e-05
chr12	35673761	35677038	H3K27ac_34418	-1.31992	4.35559	46.4228	8.24566e-07	1.59866e-05
chr14	76551813	76553526	H3K27ac_39672	0.812731	4.31463	40.9361	8.27847e-07	1.60356e-05
chr2	93307383	93309719	H3K27ac_5785	1.0687	3.01402	40.8901	8.35517e-07	1.61695e-05
chr18	74373213	74374239	H3K27ac_47403	-1.33706	2.69393	40.8773	8.37666e-07	1.61964e-05
chr6	70659479	70660711	H3K27ac_17064	-1.3731	2.07404	40.8188	8.47551e-07	1.63579e-05
chr15	25861624	25863936	H3K27ac_40375	0.923524	3.68892	40.8207	8.47233e-07	1.63579e-05
chr11	51655315	51658917	H3K27ac_30968	0.958002	3.73496	40.7849	8.53346e-07	1.644e-05
chr15	79187627	79187948	H3K27ac_41404	1.05988	3.01756	40.7882	8.52777e-07	1.644e-05
chr4	128404449	128407839	H3K27ac_12061	0.77167	5.64084	40.7568	8.58167e-07	1.65031e-05
chr8	129328978	129330768	H3K27ac_23923	1.1519	3.27129	40.7573	8.58081e-07	1.65031e-05
chr11	70375618	70377805	H3K27ac_31674	0.870069	5.56654	40.7442	8.60344e-07	1.65301e-05
chr2	28393988	28396428	H3K27ac_4407	1.04169	3.91017	40.7125	8.6584e-07	1.66058e-05
chr17	37094563	37096179	H3K27ac_45173	0.804779	4.70905	40.7168	8.65097e-07	1.66058e-05
chr16	49803152	49808660	H3K27ac_43216	1.09713	5.56297	45.4219	8.66906e-07	1.66113e-05
chr10	95692673	95694443	H3K27ac_29104	1.20689	2.29285	40.692	8.69417e-07	1.66445e-05
chr6	31024850	31033533	H3K27ac_16269	0.875701	6.25543	40.8934	8.7261e-07	1.66906e-05
chr14	56395340	56397438	H3K27ac_39074	2.21344	2.43724	51.4126	8.77183e-07	1.67481e-05
chr17	31889690	31891404	H3K27ac_44841	1.14579	2.96932	40.65	8.76793e-07	1.67481e-05
chr7	91534965	91536700	H3K27ac_20507	-1.33014	2.75561	40.6164	8.82737e-07	1.6839e-05
chr10	80391498	80392560	H3K27ac_28618	0.721238	5.45339	40.5804	8.89161e-07	1.69465e-05
chr12	78160598	78162453	H3K27ac_34998	1.11326	4.3323	42.1246	8.92396e-07	1.69929e-05
chr19	53878293	53885184	H3K27ac_49020	0.806105	6.95786	40.5429	8.95916e-07	1.70448e-05
chr2	75475656	75476273	H3K27ac_5436	0.894412	5.2116	40.5171	9.00572e-07	1.70643e-05
chr11	5312361	5317505	H3K27ac_30081	-0.879552	5.17554	40.5185	9.00327e-07	1.70643e-05
chr11	61818392	61820358	H3K27ac_31437	1.29539	3.40988	41.7578	8.98728e-07	1.70643e-05
chr17	35958218	35960670	H3K27ac_45119	1.0671	4.92862	42.9999	8.99748e-07	1.70643e-05
chr18	65967160	65969369	H3K27ac_47215	0.961063	3.31422	40.5151	9.00941e-07	1.70643e-05
chr1	167710143	167712350	H3K27ac_3009	0.816471	5.53401	40.4827	9.06857e-07	1.71611e-05
chr5	65052751	65054149	H3K27ac_13848	1.25983	2.81204	40.4688	9.09404e-07	1.71891e-05
chr11	79444788	79446037	H3K27ac_32069	1.88017	1.85329	40.4658	9.09945e-07	1.71891e-05
chr16	90333874	90335182	H3K27ac_43756	-1.19696	3.03464	40.441	9.14514e-07	1.72601e-05
chr7	87512871	87516733	H3K27ac_20338	0.836607	7.15889	40.398	9.22493e-07	1.73953e-05
chr8	130490220	130492874	H3K27ac_23961	-1.48672	3.55738	43.7642	9.34013e-07	1.7597e-05
chr10	66392611	66394223	H3K27ac_28163	1.22849	2.80731	40.2678	9.47103e-07	1.78279e-05
chr18	82727747	82730573	H3K27ac_47655	0.839978	4.84657	40.2534	9.49856e-07	1.7864e-05
chr11	75275095	75276853	H3K27ac_31818	0.73646	5.60296	40.2363	9.53156e-07	1.78977e-05
chr16	24392463	24394404	H3K27ac_42647	0.796032	6.2245	40.2354	9.53327e-07	1.78977e-05
chr11	87512937	87516785	H3K27ac_32376	1.2179	3.3896	40.5753	9.56471e-07	1.79343e-05
chr19	46591297	46595216	H3K27ac_48885	0.948376	5.4282	41.6185	9.56954e-07	1.79343e-05
chr11	76074371	76076012	H3K27ac_31890	0.904054	4.03956	40.2009	9.60013e-07	1.79758e-05
chr2	103405286	103408800	H3K27ac_5879	0.767824	5.74974	40.1672	9.66585e-07	1.80754e-05
chr8	36650797	36652248	H3K27ac_22330	0.83111	4.96396	40.165	9.67027e-07	1.80754e-05
chr7	113759729	113760989	H3K27ac_20944	1.27543	2.491	40.1074	9.78394e-07	1.82719e-05
chr13	51942028	51945303	H3K27ac_37147	0.854926	6.02968	40.1001	9.81124e-07	1.83069e-05
chr11	32095468	32100874	H3K27ac_30579	0.940335	5.44887	41.4894	9.83149e-07	1.83286e-05
chr11	3813963	3814808	H3K27ac_29952	1.29447	3.7484	42.5423	9.88251e-07	1.84077e-05
chr19	21939114	21940389	H3K27ac_48295	1.21779	2.63599	40.0338	9.93115e-07	1.84821e-05
chr1	173691960	173693372	H3K27ac_3143	1.35251	2.20399	40.0284	9.94213e-07	1.84865e-05
chr9	20972035	20973795	H3K27ac_24306	0.87633	5.22689	39.944	1.01141e-06	1.87899e-05
chr5	114348861	114350406	H3K27ac_14864	1.16169	3.41962	39.9353	1.01321e-06	1.8807e-05
chr3	105620609	105621967	H3K27ac_9305	1.31119	2.44498	39.913	1.01781e-06	1.88758e-05
chr13	103695276	103696962	H3K27ac_37914	0.76037	4.90871	39.9021	1.02008e-06	1.89015e-05
chr15	64081632	64082732	H3K27ac_41013	1.10375	2.96814	39.8793	1.02481e-06	1.89728e-05
chr15	76595553	76597807	H3K27ac_41274	1.15764	4.04952	40.6701	1.03495e-06	1.91438e-05
chr12	88033724	88035415	H3K27ac_35378	1.57333	2.79761	43.0662	1.04122e-06	1.92432e-05
chr4	120688475	120689939	H3K27ac_11889	0.711305	6.39908	39.7673	1.04849e-06	1.93608e-05
chr1	108212930	108219546	H3K27ac_1774	-1.14758	5.39378	44.9794	1.05558e-06	1.94586e-05
chr1	174429808	174433723	H3K27ac_3205	0.787687	7.68993	39.7341	1.05561e-06	1.94586e-05
chr3	51571154	51573681	H3K27ac_8054	1.45838	3.48964	44.1192	1.05947e-06	1.94967e-05
chr11	117670989	117672511	H3K27ac_33709	0.727412	5.70061	39.716	1.0595e-06	1.94967e-05
chr1	39902908	39905141	H3K27ac_365	1.00012	3.67001	39.7014	1.06267e-06	1.95381e-05
chr5	66216150	66219107	H3K27ac_13928	-1.07317	4.12305	39.6898	1.0652e-06	1.95678e-05
chr11	98901180	98904762	H3K27ac_32823	0.826298	6.00493	39.5408	1.09815e-06	2.01556e-05
chr11	60954301	60955193	H3K27ac_31416	1.2292	2.6528	39.533	1.0999e-06	2.01705e-05
chr3	52659932	52662458	H3K27ac_8177	1.0686	3.73419	39.5165	1.10363e-06	2.02215e-05
chr3	37571558	37574716	H3K27ac_7943	1.16593	3.06208	39.4738	1.11333e-06	2.03818e-05
chr9	83786087	83788283	H3K27ac_25887	-1.14228	3.42943	39.4329	1.1227e-06	2.05356e-05
chr12	35704999	35707351	H3K27ac_34421	-1.02974	4.52692	40.516	1.13249e-06	2.0697e-05
chr9	40855877	40858566	H3K27ac_24595	1.24369	3.21375	39.3664	1.13811e-06	2.07819e-05
chr7	104230990	104231577	H3K27ac_20609	1.40514	2.37361	39.5845	1.14366e-06	2.08654e-05
chr19	6275719	6276597	H3K27ac_47897	0.827	4.37194	39.2846	1.1574e-06	2.1098e-05
chr7	71285194	71287580	H3K27ac_19889	0.849747	5.25408	39.2645	1.1622e-06	2.11674e-05
chr3	65331615	65333741	H3K27ac_8365	0.722408	6.53613	39.2247	1.17174e-06	2.13231e-05
chr15	66799840	66801236	H3K27ac_41083	0.742323	5.01882	39.1725	1.18441e-06	2.15352e-05
chr1	89503569	89505545	H3K27ac_1501	0.809923	4.16563	39.1492	1.19009e-06	2.16202e-05
chr11	6574848	6576204	H3K27ac_30171	1.00543	3.01048	39.1425	1.19174e-06	2.16317e-05
chr5	115992093	115993512	H3K27ac_14975	0.915518	4.3448	39.1302	1.19476e-06	2.16498e-05
chr10	94970643	94972448	H3K27ac_29044	-1.01906	3.58996	39.1323	1.19424e-06	2.16498e-05
chr4	62248148	62248879	H3K27ac_11172	1.37251	1.91914	39.1057	1.20081e-06	2.1741e-05
chr6	100783529	100785111	H3K27ac_17740	0.753775	6.12483	39.0616	1.21179e-06	2.19211e-05
chr2	29494604	29498512	H3K27ac_4443	0.950159	4.43159	39.0383	1.21761e-06	2.19977e-05
chr9	77784633	77787498	H3K27ac_25791	0.961415	4.04505	39.0324	1.21911e-06	2.19977e-05
chr15	78833118	78834233	H3K27ac_41382	1.24626	2.59968	39.0323	1.21912e-06	2.19977e-05
chr5	115507650	115511141	H3K27ac_14931	1.45603	4.20742	46.8564	1.22814e-06	2.21418e-05
chr7	106438470	106440034	H3K27ac_20698	1.22222	2.42157	38.9901	1.22979e-06	2.21529e-05
chr15	100567457	100569286	H3K27ac_42096	1.09135	2.99038	38.9213	1.24741e-06	2.24512e-05
chr2	71981042	71984890	H3K27ac_5332	-1.1164	5.43929	39.8342	1.24896e-06	2.24602e-05
chr17	12986500	12987827	H3K27ac_44252	1.39601	2.12505	38.8574	1.26401e-06	2.27117e-05
chr9	14168926	14171006	H3K27ac_24180	0.80165	4.9103	38.8233	1.27294e-06	2.2853e-05
chr13	58723118	58725202	H3K27ac_37317	1.36467	3.22776	40.6093	1.27641e-06	2.28959e-05
chr7	146481131	146482516	H3K27ac_21702	1.22922	2.32218	38.7988	1.27943e-06	2.29309e-05
chr2	153321279	153322155	H3K27ac_6812	1.15534	2.62969	38.7872	1.2825e-06	2.29666e-05
chr6	124858011	124860098	H3K27ac_18260	0.861643	4.25623	38.7625	1.28907e-06	2.3065e-05
chr19	3323300	3326065	H3K27ac_47748	0.815228	6.02648	38.7533	1.29153e-06	2.30897e-05
chrX	166317373	166320068	H3K27ac_50154	-1.1469	3.76868	38.7394	1.29527e-06	2.3137e-05
chr2	90418960	90423305	H3K27ac_5682	0.768082	6.27016	38.6359	1.32339e-06	2.36196e-05
chr13	94759424	94761285	H3K27ac_37697	0.93891	4.01345	38.6025	1.3326e-06	2.37642e-05
chr10	118655058	118656225	H3K27ac_29638	-1.11261	3.86259	38.5969	1.33415e-06	2.3772e-05
chr7	87331479	87332179	H3K27ac_20316	1.08968	3.34975	38.5894	1.33624e-06	2.37893e-05
chr2	57089915	57091529	H3K27ac_4989	0.716604	6.47335	38.5823	1.3382e-06	2.38017e-05
chr15	64080277	64081355	H3K27ac_41012	1.20815	2.52629	38.5788	1.33917e-06	2.38017e-05
chr1	187031468	187033549	H3K27ac_3555	-0.906191	3.56449	38.5684	1.34208e-06	2.38291e-05
chr3	95799387	95800310	H3K27ac_8971	0.964288	3.79042	38.5653	1.34294e-06	2.38291e-05
chr12	70925803	70927434	H3K27ac_34735	-1.15915	3.14429	38.5524	1.34654e-06	2.38732e-05
chr6	108394126	108400104	H3K27ac_17809	0.946342	5.20285	39.9707	1.34987e-06	2.39124e-05
chr10	98921907	98924667	H3K27ac_29294	1.08672	4.4852	40.1865	1.35691e-06	2.40171e-05
chr19	9054269	9060123	H3K27ac_47984	0.867119	6.26721	38.9217	1.36327e-06	2.41096e-05
chr11	79152560	79153752	H3K27ac_32058	0.723107	5.30975	38.4734	1.36886e-06	2.41886e-05
chr14	21613368	21614276	H3K27ac_38439	0.805847	4.91523	38.4553	1.37403e-06	2.42598e-05
chr11	97001268	97008221	H3K27ac_32668	0.999625	6.46762	41.443	1.37963e-06	2.43385e-05
chr11	118059652	118063408	H3K27ac_33756	0.74537	4.96617	38.3616	1.40113e-06	2.46974e-05
chr3	148988565	148990984	H3K27ac_10148	-1.03852	3.85776	38.324	1.41218e-06	2.48715e-05
chr14	14857596	14859119	H3K27ac_38314	-1.16576	2.50981	38.2938	1.42108e-06	2.50078e-05
chr6	82723548	82724107	H3K27ac_17181	1.13532	2.96822	38.2812	1.42482e-06	2.5053e-05
chr18	60904212	60908586	H3K27ac_47104	0.786514	6.35511	38.2699	1.4282e-06	2.50916e-05
chr1	61085415	61088637	H3K27ac_984	-1.32162	4.04566	42.8194	1.43712e-06	2.52068e-05
chr12	33848159	33853472	H3K27ac_34387	0.929461	5.27932	39.5978	1.43676e-06	2.52068e-05
chr12	80781412	80786438	H3K27ac_35098	-1.19069	4.34405	41.7872	1.46202e-06	2.56225e-05
chr6	91654869	91656924	H3K27ac_17478	0.889237	4.25198	38.1342	1.46932e-06	2.57148e-05
chr16	49773581	49776519	H3K27ac_43210	1.4755	5.0735	50.5139	1.46969e-06	2.57148e-05
chr10	40104655	40108097	H3K27ac_27700	-1.25505	5.13317	40.7887	1.48461e-06	2.59546e-05
chr1	89532541	89538049	H3K27ac_1504	0.750973	5.66986	38.0726	1.48839e-06	2.59993e-05
chr3	51811013	51812191	H3K27ac_8068	0.927389	3.81907	38.0465	1.49654e-06	2.61203e-05
chr3	84518288	84520419	H3K27ac_8592	0.958997	3.94199	38.0093	1.50827e-06	2.63035e-05
chr7	89797066	89798298	H3K27ac_20452	0.737203	5.2961	37.9993	1.51144e-06	2.63373e-05
chr11	108096295	108099821	H3K27ac_33314	0.880714	3.60156	37.9812	1.51718e-06	2.64157e-05
chr11	59475976	59476569	H3K27ac_31371	1.1213	3.2065	37.9668	1.52178e-06	2.64743e-05
chr19	3332905	3335253	H3K27ac_47749	1.75936	3.44129	46.8626	1.52303e-06	2.64744e-05
chr2	131817309	131820237	H3K27ac_6491	-1.18595	4.02684	37.9142	1.5387e-06	2.67032e-05
chr9	113924957	113926274	H3K27ac_26464	-1.30301	2.48969	37.9174	1.53767e-06	2.67032e-05
chr2	180191040	180191546	H3K27ac_7550	1.10877	3.34762	37.9091	1.54035e-06	2.67102e-05
chr2	30941863	30946819	H3K27ac_4544	0.706037	5.94846	37.8391	1.56317e-06	2.70839e-05
chr8	41678892	41684992	H3K27ac_22379	0.879892	5.0796	38.0883	1.56922e-06	2.71667e-05
chr11	120000126	120001875	H3K27ac_33836	0.928406	3.55399	37.804	1.57476e-06	2.72406e-05
chr11	117343841	117344350	H3K27ac_33687	1.14558	2.62616	37.7883	1.57998e-06	2.73087e-05
chr16	10682115	10685140	H3K27ac_42313	0.923702	4.1994	37.7464	1.59396e-06	2.7528e-05
chr6	134169290	134171698	H3K27ac_18497	1.1976	3.17428	37.7398	1.5962e-06	2.75444e-05
chr6	125428858	125435172	H3K27ac_18307	0.823419	7.52803	37.711	1.60591e-06	2.76828e-05
chr17	34345379	34346342	H3K27ac_44998	1.21552	2.83718	37.7083	1.60681e-06	2.76828e-05
chr6	129152834	129156142	H3K27ac_18399	-1.34602	3.14334	38.9475	1.61165e-06	2.77438e-05
chr11	75449721	75451181	H3K27ac_31838	1.16361	2.88704	37.6641	1.62186e-06	2.7897e-05
chr8	129385247	129393857	H3K27ac_23937	0.842356	7.19723	37.6269	1.63464e-06	2.80943e-05
chr1	61110523	61112396	H3K27ac_989	-1.32335	2.84954	38.0065	1.63926e-06	2.81475e-05
chr9	69926885	69929043	H3K27ac_25613	-0.853886	4.72486	37.6103	1.64038e-06	2.81475e-05
chr10	117061811	117067161	H3K27ac_29474	-0.843039	6.43414	37.5927	1.64647e-06	2.82068e-05
chr13	20202343	20204333	H3K27ac_36252	1.1147	3.36681	37.5936	1.64617e-06	2.82068e-05
chr15	63879961	63880947	H3K27ac_40962	1.18843	2.21632	37.483	1.6851e-06	2.88454e-05
chr1	167123669	167125852	H3K27ac_2973	0.757057	6.19084	37.4604	1.69318e-06	2.89605e-05
chr12	100563612	100565363	H3K27ac_35478	1.25814	2.23858	37.4408	1.70021e-06	2.90574e-05
chr4	151359607	151361779	H3K27ac_12912	0.760245	5.22364	37.4287	1.70459e-06	2.90861e-05
chr9	65396865	65401287	H3K27ac_25424	0.754079	6.19609	37.4286	1.70461e-06	2.90861e-05
chr7	108603567	108608582	H3K27ac_20817	0.838773	5.79027	37.3766	1.72349e-06	2.93846e-05
chr12	86910370	86913403	H3K27ac_35338	1.33927	3.28114	39.1735	1.72823e-06	2.9442e-05
chr9	44372968	44374393	H3K27ac_24734	1.24798	2.26101	37.3406	1.73672e-06	2.9563e-05
chr15	50719747	50721705	H3K27ac_40628	0.775224	5.87031	37.2941	1.75391e-06	2.98319e-05
chr6	38824131	38826989	H3K27ac_16508	0.825642	6.69857	37.1874	1.79413e-06	3.04917e-05
chr2	28368767	28370836	H3K27ac_4397	0.84808	4.69689	37.1715	1.80019e-06	3.05703e-05
chr15	99194207	99195889	H3K27ac_41995	0.949025	4.40245	37.1141	1.8223e-06	3.09212e-05
chr14	78781516	78782923	H3K27ac_39729	1.23946	2.64103	37.1084	1.82452e-06	3.09342e-05
chr5	138258027	138259749	H3K27ac_15602	1.28768	2.51709	37.1323	1.82626e-06	3.09391e-05
chr3	115633028	115644962	H3K27ac_9493	-0.869201	7.17985	37.0961	1.82929e-06	3.09413e-05
chr7	105692521	105694145	H3K27ac_20652	1.06337	2.76314	37.0993	1.82807e-06	3.09413e-05
chr17	66302344	66304021	H3K27ac_45797	-0.863361	4.8994	37.0883	1.83235e-06	3.09686e-05
chr3	97817445	97818190	H3K27ac_9056	0.753594	4.9508	37.0304	1.85507e-06	3.13278e-05
chr5	53300833	53302155	H3K27ac_13652	1.0725	3.22358	37.009	1.86358e-06	3.13969e-05
chr6	145251493	145253497	H3K27ac_18854	0.753023	4.56957	37.0138	1.86166e-06	3.13969e-05
chr15	76629343	76630649	H3K27ac_41284	1.43474	2.55027	37.0101	1.86313e-06	3.13969e-05
chr4	144789851	144791079	H3K27ac_12730	1.13558	2.40885	36.9943	1.86941e-06	3.14456e-05
chr6	67133203	67134632	H3K27ac_17047	1.4039	2.15994	36.9945	1.86935e-06	3.14456e-05
chr11	78872942	78874687	H3K27ac_32035	1.34085	2.9631	38.2101	1.87247e-06	3.14723e-05
chr9	88203355	88205178	H3K27ac_25926	1.23977	2.86807	36.9714	1.87855e-06	3.15496e-05
chr11	119716135	119719233	H3K27ac_33825	0.922834	4.96861	37.6712	1.88159e-06	3.15757e-05
chr8	124806314	124810497	H3K27ac_23722	0.778386	7.19022	36.9536	1.88573e-06	3.16204e-05
chr4	149745988	149746418	H3K27ac_12849	1.23849	2.84334	36.9479	1.88801e-06	3.16338e-05
chr16	62853573	62854521	H3K27ac_43522	1.01181	3.89714	36.9264	1.89668e-06	3.17541e-05
chr2	156082335	156085233	H3K27ac_6914	0.880363	4.4064	36.9202	1.8992e-06	3.17714e-05
chr10	74879214	74881411	H3K27ac_28417	-1.39723	3.66916	40.48	1.90336e-06	3.18161e-05
chr11	70033769	70035362	H3K27ac_31652	0.909466	3.85657	36.885	1.91355e-06	3.19364e-05
chr19	31983470	31985767	H3K27ac_48494	-1.2267	3.12248	37.0385	1.91231e-06	3.19364e-05
chr12	80957585	80961372	H3K27ac_35132	1.03803	4.33507	38.1259	1.91547e-06	3.19434e-05
chr11	60955279	60958132	H3K27ac_31417	0.824162	5.21119	36.861	1.92337e-06	3.20502e-05
chr11	119020820	119022905	H3K27ac_33791	0.868512	4.31809	36.8431	1.93076e-06	3.21481e-05
chr18	80837919	80839321	H3K27ac_47560	1.06554	2.23451	36.7884	1.95346e-06	3.25008e-05
chr15	64109468	64111905	H3K27ac_41025	-1.13026	3.13664	36.7846	1.95507e-06	3.25023e-05
chr1	59819199	59820179	H3K27ac_901	0.691754	5.067	36.7697	1.96132e-06	3.25554e-05
chr17	87601723	87603368	H3K27ac_46321	1.03432	3.12669	36.77	1.96118e-06	3.25554e-05
chr6	108635284	108639929	H3K27ac_17857	1.37125	5.19205	47.3326	1.96866e-06	3.26519e-05
chr7	86446047	86447738	H3K27ac_20283	1.01334	4.01023	36.7443	1.972e-06	3.26819e-05
chr5	114262992	114267059	H3K27ac_14858	0.722891	4.8783	36.687	1.99634e-06	3.30596e-05
chr7	6234490	6235664	H3K27ac_19061	-0.799664	4.53391	36.6605	2.00771e-06	3.32222e-05
chr2	156706917	156709652	H3K27ac_6934	0.869201	4.5722	36.6277	2.02189e-06	3.34309e-05
chr5	115970822	115972911	H3K27ac_14972	0.777135	5.51875	36.6147	2.02753e-06	3.34982e-05
chr1	156933373	156934447	H3K27ac_2647	1.0878	3.28192	36.5516	2.0552e-06	3.38695e-05
chr5	139636620	139637925	H3K27ac_15624	-1.18834	2.48376	36.549	2.05635e-06	3.38695e-05
chr9	62219202	62223343	H3K27ac_25287	0.966605	5.53006	39.073	2.05331e-06	3.38695e-05
chr11	59211017	59212231	H3K27ac_31359	1.21666	2.34588	36.5569	2.05288e-06	3.38695e-05
chr11	97182082	97184855	H3K27ac_32682	1.14595	4.6071	40.5557	2.06413e-06	3.39715e-05
chr11	115058294	115062472	H3K27ac_33523	0.762262	6.51928	36.4736	2.08992e-06	3.43694e-05
chr8	96533063	96534179	H3K27ac_23156	1.13857	2.89014	36.47	2.09157e-06	3.437e-05
chr19	5849684	5850682	H3K27ac_47876	0.741504	5.20351	36.4611	2.09558e-06	3.44094e-05
chr11	77307039	77308009	H3K27ac_31959	0.919219	4.21809	36.4528	2.09933e-06	3.44446e-05
chr17	23683009	23684493	H3K27ac_44397	0.807826	4.78112	36.4204	2.11402e-06	3.46589e-05
chr4	133049852	133050544	H3K27ac_12322	0.995988	2.60482	36.4113	2.11814e-06	3.46998e-05
chr13	30844068	30848697	H3K27ac_36524	1.09546	4.64186	39.7618	2.12399e-06	3.4769e-05
chr13	51940426	51941641	H3K27ac_37146	0.73016	5.05848	36.3805	2.13227e-06	3.48777e-05
chr3	138529713	138532178	H3K27ac_9988	1.27745	3.45854	38.191	2.13952e-06	3.49576e-05
chr6	89205921	89209141	H3K27ac_17428	1.12824	4.13336	38.3551	2.14043e-06	3.49576e-05
chr7	65913221	65914455	H3K27ac_19815	0.804061	5.29282	36.3274	2.1568e-06	3.5198e-05
chr10	43458676	43461799	H3K27ac_27838	0.83687	5.61351	36.3204	2.16004e-06	3.5224e-05
chr2	6607442	6611541	H3K27ac_3899	0.974724	4.2865	36.5556	2.16666e-06	3.5305e-05
chr4	135370063	135372034	H3K27ac_12497	-1.04768	3.23947	36.2876	2.17538e-06	3.54201e-05
chr8	130881277	130884296	H3K27ac_23970	0.803013	5.9527	36.2749	2.18136e-06	3.54903e-05
chr11	88349802	88351551	H3K27ac_32434	1.03797	2.88456	36.2003	2.21677e-06	3.60389e-05
chr16	11063146	11063911	H3K27ac_42347	1.10682	2.48744	36.1877	2.22281e-06	3.61096e-05
chr17	64949219	64951900	H3K27ac_45765	0.798179	6.31238	36.1811	2.22596e-06	3.61334e-05
chr15	74797835	74799273	H3K27ac_41191	1.03307	3.61561	36.1345	2.24853e-06	3.64719e-05
chr4	33015128	33017078	H3K27ac_10704	-1.06354	3.30445	36.1114	2.25979e-06	3.6599e-05
chr11	49623750	49627196	H3K27ac_30912	1.05155	4.81037	38.8706	2.25879e-06	3.6599e-05
chr2	29242985	29245374	H3K27ac_4431	0.977917	4.18868	36.097	2.26684e-06	3.66758e-05
chr5	34842794	34845573	H3K27ac_13511	-1.05207	3.44084	36.0947	2.26797e-06	3.66758e-05
chr2	172998063	173000466	H3K27ac_7449	0.811823	4.90614	36.0721	2.27908e-06	3.68172e-05
chr15	76146498	76149358	H3K27ac_41242	-0.832229	5.54058	36.0699	2.28016e-06	3.68172e-05
chr6	108614368	108616493	H3K27ac_17851	0.843152	5.36158	36.3644	2.28225e-06	3.68231e-05
chr6	119798202	119798464	H3K27ac_18083	0.898604	3.64029	36.0535	2.28828e-06	3.68924e-05
chr2	167173405	167178417	H3K27ac_7269	0.707767	6.67385	36.0234	2.30329e-06	3.71064e-05
chr7	119351283	119354282	H3K27ac_21026	0.964593	4.05639	36.0133	2.30832e-06	3.71595e-05
chr12	33968318	33971179	H3K27ac_34398	0.906754	3.83702	35.982	2.32401e-06	3.73839e-05
chr5	103854312	103854917	H3K27ac_14457	0.905463	3.91275	35.9616	2.33433e-06	3.75216e-05
chr2	132494737	132496285	H3K27ac_6537	1.0361	4.05335	36.3134	2.34025e-06	3.75884e-05
chr13	108692371	108694961	H3K27ac_38000	-0.893587	4.51574	35.9324	2.34917e-06	3.77034e-05
chr18	21125963	21133277	H3K27ac_46550	0.80999	5.34191	35.9289	2.35094e-06	3.77034e-05
chr7	88131083	88133188	H3K27ac_20416	1.18833	3.08713	35.913	2.35906e-06	3.78052e-05
chr12	33829834	33832450	H3K27ac_34380	0.746326	5.49611	35.8627	2.38498e-06	3.81632e-05
chr17	5091180	5092281	H3K27ac_44096	-1.23276	2.69745	35.8645	2.38404e-06	3.81632e-05
chr7	87811555	87813098	H3K27ac_20368	1.01757	2.69269	35.841	2.39628e-06	3.83153e-05
chr4	134675249	134676316	H3K27ac_12460	0.913346	4.09974	35.8268	2.40369e-06	3.84051e-05
chr11	106462081	106463458	H3K27ac_33178	1.00764	3.18754	35.8114	2.41176e-06	3.85051e-05
chr6	37319749	37321743	H3K27ac_16394	0.927996	4.15085	35.8008	2.4173e-06	3.85647e-05
chr2	48278935	48280981	H3K27ac_4897	-1.09634	2.80494	35.7771	2.4298e-06	3.87353e-05
chr9	96834617	96838712	H3K27ac_26125	-0.880344	5.28065	35.7723	2.43234e-06	3.87469e-05
chr5	123468770	123469535	H3K27ac_15246	1.16434	2.91184	35.7421	2.44838e-06	3.89733e-05
chr18	39528205	39529967	H3K27ac_46847	1.0819	2.89804	35.7361	2.45156e-06	3.89949e-05
chr5	34868442	34869581	H3K27ac_13514	0.864203	4.23086	35.7138	2.46348e-06	3.91553e-05
chr14	60745921	60751900	H3K27ac_39188	-0.919477	6.76996	36.311	2.46979e-06	3.92263e-05
chr11	75285376	75286480	H3K27ac_31821	1.24632	2.40402	35.6592	2.493e-06	3.95655e-05
chr7	91031938	91033379	H3K27ac_20482	0.7408	5.43866	35.633	2.5073e-06	3.97629e-05
chr9	65425760	65427927	H3K27ac_25427	0.734511	5.12196	35.6156	2.51681e-06	3.98841e-05
chr19	53350921	53352484	H3K27ac_48976	1.88726	2.5051	42.6548	2.52829e-06	4.00363e-05
chr3	9004040	9004885	H3K27ac_7604	0.853344	3.93169	35.5895	2.53117e-06	4.00522e-05
chr3	115560439	115562446	H3K27ac_9483	1.13156	2.74959	35.573	2.54032e-06	4.01672e-05
chr15	100249568	100252722	H3K27ac_42061	0.902183	5.1665	36.5402	2.54822e-06	4.02622e-05
chr3	100245982	100249062	H3K27ac_9080	0.922386	3.73746	35.5525	2.55173e-06	4.0278e-05
chr17	57414123	57416571	H3K27ac_45742	0.725582	5.12764	35.5502	2.55299e-06	4.0278e-05
chr15	25877206	25878840	H3K27ac_40378	-1.04563	2.89147	35.5429	2.55707e-06	4.03125e-05
chr5	122754032	122755381	H3K27ac_15176	1.21939	2.20162	35.5083	2.5765e-06	4.05888e-05
chr2	127984475	127986711	H3K27ac_6354	-0.932719	4.83532	35.4957	2.58356e-06	4.06702e-05
chr2	168420229	168422019	H3K27ac_7358	0.964248	4.39881	35.9722	2.58828e-06	4.07144e-05
chr5	97344677	97348463	H3K27ac_14330	-1.0599	5.09533	39.0835	2.59551e-06	4.07981e-05
chr11	106024714	106030364	H3K27ac_33116	-0.961837	6.64854	36.8545	2.60882e-06	4.09771e-05
chr11	67339060	67341439	H3K27ac_31527	1.43076	3.16735	38.7684	2.61276e-06	4.10088e-05
chr15	57975977	57977084	H3K27ac_40722	0.910332	3.65798	35.4283	2.62193e-06	4.11225e-05
chr11	4748653	4749552	H3K27ac_30051	0.779538	5.50975	35.3871	2.64573e-06	4.14653e-05
chr5	139839999	139841462	H3K27ac_15642	0.99011	3.68982	35.3666	2.65762e-06	4.16211e-05
chr1	52226817	52228720	H3K27ac_627	1.25268	2.96605	35.7237	2.67155e-06	4.17581e-05
chr4	148654824	148659330	H3K27ac_12796	-1.04564	6.37235	36.0492	2.67407e-06	4.17581e-05
chr7	89385147	89386289	H3K27ac_20448	1.03463	2.66798	35.3382	2.6742e-06	4.17581e-05
chr11	101845663	101845999	H3K27ac_32979	1.10635	2.9458	35.3441	2.67074e-06	4.17581e-05
chr3	137639933	137641901	H3K27ac_9948	1.04874	3.3031	35.3113	2.69001e-06	4.19437e-05
chr12	17396175	17398672	H3K27ac_34136	0.963974	3.80024	35.3144	2.68819e-06	4.19437e-05
chr5	117806999	117808545	H3K27ac_15021	0.766233	5.487	35.2936	2.7005e-06	4.20766e-05
chr16	48593478	48596859	H3K27ac_43180	-1.10041	4.17618	37.0507	2.7111e-06	4.22109e-05
chr4	119705088	119705312	H3K27ac_11855	1.16444	2.8484	35.2522	2.72513e-06	4.23984e-05
chr15	86002980	86004891	H3K27ac_41722	0.933305	3.38539	35.1904	2.76241e-06	4.29471e-05
chr11	85136970	85138920	H3K27ac_32232	-1.27081	2.31924	35.1845	2.76595e-06	4.29708e-05
chr2	18830715	18833502	H3K27ac_4178	1.11552	2.69892	35.1764	2.77087e-06	4.3016e-05
chrX	140959604	140961791	H3K27ac_49924	-1.5963	3.40372	35.1511	2.78633e-06	4.32245e-05
chr1	36291369	36293481	H3K27ac_218	1.0521	3.48337	35.1189	2.80613e-06	4.35002e-05
chr8	3345141	3346541	H3K27ac_21909	-1.1836	2.78061	35.0998	2.81794e-06	4.36515e-05
chr10	127111825	127112534	H3K27ac_29805	1.23878	3.00342	35.448	2.82177e-06	4.36791e-05
chr5	20560641	20562436	H3K27ac_13182	0.732646	5.77432	35.0809	2.82971e-06	4.37702e-05
chr10	95025537	95027155	H3K27ac_29048	0.662555	5.7055	35.0764	2.8325e-06	4.37817e-05
chr2	129626274	129627635	H3K27ac_6435	0.711222	5.36863	35.0316	2.86061e-06	4.41842e-05
chr5	106226474	106231027	H3K27ac_14606	0.718043	5.51079	34.9984	2.88161e-06	4.44764e-05
chr14	56387560	56388866	H3K27ac_39072	1.72693	3.27617	42.6704	2.8859e-06	4.44867e-05
chr17	29230734	29232491	H3K27ac_44697	0.823346	6.03644	35.3377	2.88645e-06	4.44867e-05
chr1	89525860	89529495	H3K27ac_1503	1.16386	3.01717	34.977	2.89525e-06	4.45902e-05
chr11	53586708	53593124	H3K27ac_31081	0.731546	5.75761	34.9725	2.8981e-06	4.46019e-05
chr13	73869591	73880013	H3K27ac_37501	-0.870645	7.20503	34.9628	2.90432e-06	4.46654e-05
chr3	135487905	135489463	H3K27ac_9879	0.735851	4.82309	34.9512	2.91179e-06	4.47481e-05
chr15	79152186	79155173	H3K27ac_41401	0.84593	5.15698	35.1553	2.9435e-06	4.52028e-05
chr3	84457227	84459639	H3K27ac_8570	0.900899	4.36645	34.882	2.95656e-06	4.53708e-05
chr11	78863942	78866225	H3K27ac_32033	1.58089	3.62272	42.0365	2.97408e-06	4.56069e-05
chr11	87498263	87505347	H3K27ac_32375	0.84348	4.81021	34.8379	2.98556e-06	4.57501e-05
chr8	47953679	47956615	H3K27ac_22462	-1.06378	3.33343	34.8341	2.98807e-06	4.57557e-05
chr12	71087374	71088453	H3K27ac_34740	0.771923	4.5747	34.8269	2.9928e-06	4.5763e-05
chr15	74823849	74832970	H3K27ac_41196	0.944591	6.44596	37.2697	2.99284e-06	4.5763e-05
chr7	134337261	134340414	H3K27ac_21452	0.71341	6.32486	34.8187	2.99827e-06	4.58132e-05
chr17	26741225	26744011	H3K27ac_44537	1.17786	4.18239	38.1474	3.02115e-06	4.61299e-05
chr7	71192940	71195495	H3K27ac_19881	0.912884	4.7453	34.7426	3.04919e-06	4.64914e-05
chr7	134950476	134951672	H3K27ac_21489	1.17714	3.36862	35.4115	3.04786e-06	4.64914e-05
chr2	146022612	146025690	H3K27ac_6642	-0.906751	4.33244	34.7184	3.06555e-06	4.67075e-05
chr9	119910626	119911381	H3K27ac_26683	1.05597	3.08775	34.6968	3.08022e-06	4.68976e-05
chr4	132817564	132821716	H3K27ac_12309	-0.70202	5.28952	34.6624	3.10386e-06	4.72237e-05
chr19	10954051	10956926	H3K27ac_48071	0.724049	5.55735	34.6231	3.13101e-06	4.76029e-05
chr19	53607646	53616714	H3K27ac_49004	0.788968	6.87139	34.5867	3.15643e-06	4.79552e-05
chr4	59338931	59341280	H3K27ac_11131	-1.03785	3.50171	34.5822	3.15952e-06	4.79681e-05
chr2	91804739	91805291	H3K27ac_5734	1.39746	2.1739	34.9779	3.18048e-06	4.8252e-05
chr14	56386816	56387467	H3K27ac_39071	1.12749	3.39774	34.8717	3.18787e-06	4.83297e-05
chr13	42146021	42148814	H3K27ac_36759	0.690574	7.24025	34.5031	3.2156e-06	4.87155e-05
chr1	167615823	167627478	H3K27ac_2997	0.686902	6.89927	34.4925	3.22319e-06	4.87375e-05
chr4	119705529	119705986	H3K27ac_11856	1.05601	2.94898	34.4915	3.2239e-06	4.87375e-05
chr19	28686452	28687982	H3K27ac_48363	-1.20232	3.36389	34.5537	3.21936e-06	4.87375e-05
chr5	115611286	115611730	H3K27ac_14948	1.21614	2.31325	34.4771	3.23421e-06	4.88016e-05
chr11	50025649	50027609	H3K27ac_30929	0.947617	4.78264	35.7248	3.235e-06	4.88016e-05
chr16	10978762	10980619	H3K27ac_42339	1.01691	3.82691	34.5463	3.23275e-06	4.88016e-05
chr19	34627542	34629107	H3K27ac_48615	1.31217	1.91754	34.4725	3.23756e-06	4.88057e-05
chr7	4075058	4076823	H3K27ac_19017	-0.954099	3.39004	34.4572	3.24858e-06	4.89027e-05
chr16	33707387	33709490	H3K27ac_42881	0.888038	4.74328	34.4591	3.24719e-06	4.89027e-05
chr4	34073942	34077418	H3K27ac_10738	-1.30191	3.85434	36.2642	3.25287e-06	4.89329e-05
chr12	79326727	79328141	H3K27ac_35033	0.713793	5.65406	34.4355	3.26427e-06	4.90697e-05
chr4	88782826	88784495	H3K27ac_11413	0.738698	5.27771	34.3782	3.30619e-06	4.96301e-05
chr12	17476770	17479313	H3K27ac_34156	0.810133	4.48698	34.3786	3.30589e-06	4.96301e-05
chr8	129442869	129445172	H3K27ac_23944	1.01689	3.05362	34.3607	3.31913e-06	4.97892e-05
chr7	82726648	82733567	H3K27ac_20141	0.825262	5.81633	34.6713	3.33774e-06	5.00333e-05
chr11	106563685	106566765	H3K27ac_33193	1.36239	3.86088	39.0895	3.34252e-06	5.00698e-05
chr7	109165043	109167119	H3K27ac_20872	0.926201	3.66963	34.2992	3.36497e-06	5.03708e-05
chr9	96654190	96655294	H3K27ac_26113	1.06153	2.5771	34.2894	3.37234e-06	5.04456e-05
chr2	151783304	151789724	H3K27ac_6716	0.823554	5.55942	34.6696	3.40138e-06	5.08444e-05
chr12	111797958	111799826	H3K27ac_35842	-1.16042	2.24935	34.2423	3.40794e-06	5.09068e-05
chr10	116871376	116873145	H3K27ac_29464	-0.823103	4.23133	34.2237	3.42215e-06	5.10833e-05
chr5	64547504	64548167	H3K27ac_13796	1.41797	2.17885	34.672	3.42738e-06	5.11257e-05
chr16	36930353	36932778	H3K27ac_42961	1.01606	3.36659	34.186	3.45115e-06	5.14443e-05
chr13	36818525	36819886	H3K27ac_36630	0.895449	3.46694	34.1428	3.48459e-06	5.19065e-05
chr6	94584298	94588868	H3K27ac_17500	0.759892	5.01157	34.1269	3.49701e-06	5.20553e-05
chr6	135272994	135273994	H3K27ac_18588	1.13168	2.45883	34.1053	3.51401e-06	5.22718e-05
chr9	43794999	43798113	H3K27ac_24663	0.887362	3.89397	34.0797	3.53414e-06	5.25347e-05
chr5	54386791	54387539	H3K27ac_13730	0.812799	3.99348	34.0032	3.59527e-06	5.33497e-05
chr15	77696702	77697720	H3K27ac_41319	1.46226	2.49136	35.6928	3.59647e-06	5.33497e-05
chr16	23984450	23985513	H3K27ac_42615	0.834392	4.65823	34.0076	3.59178e-06	5.33497e-05
chr8	13623095	13627233	H3K27ac_22013	0.690047	5.70087	33.9775	3.61606e-06	5.36031e-05
chr12	16003632	16007322	H3K27ac_34077	-1.10797	5.0594	37.1029	3.62003e-06	5.36247e-05
chr8	72525017	72528037	H3K27ac_22618	0.807648	4.8207	33.9251	3.65887e-06	5.41624e-05
chr14	32226225	32229774	H3K27ac_38672	0.631316	5.45976	33.9217	3.66168e-06	5.41665e-05
chr5	123920846	123921738	H3K27ac_15274	1.24689	2.17631	33.9138	3.66816e-06	5.42248e-05
chr1	172105355	172106370	H3K27ac_3058	0.732527	4.42696	33.8987	3.68059e-06	5.43333e-05
chr2	78890237	78892566	H3K27ac_5536	-1.01538	3.63906	33.9001	3.67948e-06	5.43333e-05
chr7	105318333	105320691	H3K27ac_20636	1.51258	4.12353	42.3317	3.70026e-06	5.45858e-05
chr3	88424286	88428140	H3K27ac_8707	0.685009	6.37992	33.8717	3.70304e-06	5.45892e-05
chr4	132453720	132454737	H3K27ac_12270	1.00688	2.8502	33.8672	3.70673e-06	5.46058e-05
chr2	18529366	18531675	H3K27ac_4156	0.713675	5.47731	33.8497	3.72139e-06	5.47463e-05
chr15	38400792	38403567	H3K27ac_40574	0.774277	5.59212	33.8497	3.72134e-06	5.47463e-05
chr17	44901964	44905927	H3K27ac_45270	-1.04897	4.75029	37.022	3.74486e-06	5.50536e-05
chr1	182352292	182355130	H3K27ac_3382	1.04991	3.77619	34.104	3.78211e-06	5.55629e-05
chr7	148352876	148356053	H3K27ac_21798	0.821677	4.93584	33.7573	3.79954e-06	5.57538e-05
chr19	36628396	36629098	H3K27ac_48655	1.07959	3.88352	34.1201	3.80032e-06	5.57538e-05
chr8	86322334	86324094	H3K27ac_22978	-0.991464	3.04971	33.7397	3.81465e-06	5.59254e-05
chr4	87739918	87741177	H3K27ac_11381	0.754442	4.69358	33.7312	3.82197e-06	5.59863e-05
chr14	55110379	55113597	H3K27ac_39023	-0.673421	5.32483	33.7288	3.82405e-06	5.59863e-05
chr11	59925703	59929963	H3K27ac_31386	0.821551	7.23698	33.8677	3.84128e-06	5.62002e-05
chr16	32518834	32522191	H3K27ac_42805	0.799204	5.21257	33.6133	3.9249e-06	5.73842e-05
chr13	102506081	102507838	H3K27ac_37892	1.12712	2.68533	33.6063	3.93116e-06	5.74364e-05
chr7	3290493	3291425	H3K27ac_18993	1.03437	2.78182	33.5975	3.93893e-06	5.75106e-05
chr9	45820837	45823083	H3K27ac_24840	0.722118	6.55298	33.5927	3.94327e-06	5.75345e-05
chr4	144481927	144485032	H3K27ac_12712	1.01619	5.43362	37.3175	3.98322e-06	5.80778e-05
chr10	21080856	21086920	H3K27ac_27384	0.746077	4.69577	33.3975	4.12129e-06	6.00498e-05
chr3	85907199	85909026	H3K27ac_8615	-1.10256	2.44447	33.3908	4.12751e-06	6.00585e-05
chr13	35220994	35224366	H3K27ac_36610	0.858517	4.35623	33.3935	4.12501e-06	6.00585e-05
chr1	163325472	163327409	H3K27ac_2843	0.901374	3.57812	33.3759	4.1415e-06	6.00661e-05
chr4	97417874	97419005	H3K27ac_11471	0.846419	4.64453	33.3757	4.14169e-06	6.00661e-05
chr8	124822673	124824133	H3K27ac_23724	1.13715	3.18721	33.4448	4.13911e-06	6.00661e-05
chr12	26752219	26756375	H3K27ac_34293	-0.807731	5.95878	33.38	4.1421e-06	6.00661e-05
chr16	78198524	78201448	H3K27ac_43655	-1.0048	3.87072	33.3794	4.1382e-06	6.00661e-05
chr1	158868696	158870461	H3K27ac_2723	0.769397	6.40551	33.3648	4.15194e-06	6.01562e-05
chr3	37211393	37213414	H3K27ac_7922	0.798767	5.70978	33.5188	4.15395e-06	6.01562e-05
chr19	55988582	55990988	H3K27ac_49047	-1.07033	4.3159	33.3483	4.1675e-06	6.03115e-05
chr2	12339509	12341368	H3K27ac_4080	0.669923	5.64157	33.34	4.1754e-06	6.03849e-05
chr8	60069643	60070898	H3K27ac_22508	1.04375	2.34838	33.3061	4.20762e-06	6.08096e-05
chr11	20232277	20232532	H3K27ac_30300	1.09901	2.69668	33.2934	4.21976e-06	6.09439e-05
chrX	45815397	45816425	H3K27ac_49439	1.10709	2.42408	33.2506	4.26098e-06	6.14976e-05
chr4	108807969	108810416	H3K27ac_11712	-1.11335	3.36961	33.2455	4.2659e-06	6.1527e-05
chr1	55502566	55504893	H3K27ac_801	1.08049	3.8011	34.2432	4.275e-06	6.15743e-05
chr4	56927444	56929392	H3K27ac_11049	-1.31717	3.23684	33.2376	4.27354e-06	6.15743e-05
chr5	123469652	123470083	H3K27ac_15247	1.11514	2.25383	33.2332	4.27783e-06	6.15743e-05
chr17	34328123	34329183	H3K27ac_44990	1.00218	3.3282	33.2124	4.29811e-06	6.18244e-05
chr6	42303950	42305070	H3K27ac_16620	1.17306	3.12467	33.5154	4.31147e-06	6.19748e-05
chr9	72288548	72290483	H3K27ac_25695	1.26317	2.76069	33.2767	4.35798e-06	6.26012e-05
chr8	122748776	122749741	H3K27ac_23675	1.11117	2.65084	33.1276	4.38182e-06	6.2859e-05
chr13	52052876	52054179	H3K27ac_37152	1.89091	2.25566	39.6783	4.38101e-06	6.2859e-05
chr3	137637021	137639158	H3K27ac_9947	0.963262	3.574	33.1231	4.38636e-06	6.2882e-05
chr4	57967233	57969200	H3K27ac_11078	0.886451	5.10556	34.2079	4.38954e-06	6.28854e-05
chr17	6172429	6174084	H3K27ac_44139	0.941703	3.42494	33.1156	4.39387e-06	6.29051e-05
chr19	9063132	9068372	H3K27ac_47985	0.734893	7.29932	33.1017	4.40775e-06	6.30616e-05
chr14	8930697	8931538	H3K27ac_38298	0.823753	4.59211	33.0947	4.41486e-06	6.3121e-05
chr5	116203262	116207280	H3K27ac_14989	-1.11756	5.25959	35.334	4.42241e-06	6.31865e-05
chr15	81986158	81988524	H3K27ac_41613	1.01338	4.12133	33.9154	4.43181e-06	6.32785e-05
chr17	66868221	66869068	H3K27ac_45819	0.84559	4.60586	33.0686	4.44117e-06	6.33274e-05
chr19	31987776	31989391	H3K27ac_48496	-1.08649	2.6853	33.0694	4.44038e-06	6.33274e-05
chr1	73980924	73984466	H3K27ac_1179	0.700867	5.37965	32.9681	4.54419e-06	6.47532e-05
chr2	168313536	168315629	H3K27ac_7341	1.25588	3.60184	35.743	4.58489e-06	6.52896e-05
chr14	45697187	45700149	H3K27ac_38790	1.06258	3.17522	32.8923	4.62357e-06	6.57965e-05
chr14	70455242	70457914	H3K27ac_39453	1.015	5.1754	36.3805	4.64015e-06	6.59724e-05
chr14	78702818	78704405	H3K27ac_39717	1.05869	3.24391	32.8748	4.64211e-06	6.59724e-05
chr8	125286250	125287991	H3K27ac_23744	1.13374	3.45384	33.5915	4.67658e-06	6.64181e-05
chr2	132116030	132117476	H3K27ac_6516	1.11116	2.28106	32.8294	4.69057e-06	6.65724e-05
chr4	94771993	94774926	H3K27ac_11455	0.762239	4.98111	32.8173	4.70353e-06	6.6712e-05
chr11	118261133	118264489	H3K27ac_33773	0.739567	5.73667	32.8106	4.71081e-06	6.67709e-05
chr7	130442917	130444904	H3K27ac_21284	1.03018	3.44258	32.7912	4.73176e-06	6.69789e-05
chr17	50817307	50818475	H3K27ac_45506	1.17738	2.23623	32.7927	4.73012e-06	6.69789e-05
chr12	78139691	78141539	H3K27ac_34992	0.757017	4.80173	32.7766	4.74761e-06	6.71587e-05
chr10	66921084	66922632	H3K27ac_28219	1.21719	2.85121	33.1764	4.75516e-06	6.7221e-05
chr8	11463231	11465298	H3K27ac_21976	1.00615	3.14202	32.6984	4.83347e-06	6.82827e-05
chr6	38383169	38384827	H3K27ac_16452	0.718128	6.03091	32.6903	4.84248e-06	6.83494e-05
chr13	94663205	94664890	H3K27ac_37693	-1.4494	2.87878	33.4314	4.84459e-06	6.83494e-05
chr5	122846494	122847930	H3K27ac_15186	1.11697	3.15899	32.6628	4.87312e-06	6.87065e-05
chr12	88027288	88027970	H3K27ac_35376	1.35681	2.32789	33.712	4.88662e-06	6.88513e-05
chr10	128377106	128378420	H3K27ac_29915	-0.901046	3.49725	32.645	4.89313e-06	6.88522e-05
chr17	84700907	84715486	H3K27ac_46216	-0.929135	8.53004	33.6216	4.89247e-06	6.88522e-05
chr1	129243554	129246059	H3K27ac_1943	0.932182	3.09885	32.6398	4.89895e-06	6.88723e-05
chr6	31037313	31041020	H3K27ac_16272	0.8224	4.63572	32.6374	4.9016e-06	6.88723e-05
chr15	38007560	38008617	H3K27ac_40561	0.888449	5.25215	33.706	4.90424e-06	6.88723e-05
chr9	63592596	63596371	H3K27ac_25344	1.0854	3.67064	33.3636	4.91769e-06	6.90158e-05
chr2	168399672	168410983	H3K27ac_7355	0.675763	7.0836	32.6131	4.92906e-06	6.90873e-05
chr13	30922038	30925759	H3K27ac_36542	0.799991	4.39956	32.6129	4.92926e-06	6.90873e-05
chr14	66841654	66852425	H3K27ac_39391	0.721009	6.75258	32.5502	5.00091e-06	7.00456e-05
chr10	117342517	117343964	H3K27ac_29529	0.655477	6.53247	32.5295	5.02478e-06	7.03337e-05
chr10	6265562	6267440	H3K27ac_26952	1.19383	2.47896	32.5177	5.03835e-06	7.04774e-05
chr11	117126447	117129660	H3K27ac_33676	0.676013	5.89872	32.5148	5.04181e-06	7.04797e-05
chr13	30857082	30859939	H3K27ac_36527	0.833241	4.55209	32.5085	5.0491e-06	7.05353e-05
chr2	35335160	35337142	H3K27ac_4787	1.03458	2.57739	32.4983	5.06099e-06	7.06552e-05
chr7	20516859	20521708	H3K27ac_19235	0.76621	6.66785	32.4721	5.09163e-06	7.10365e-05
chr16	90329809	90333055	H3K27ac_43755	-0.859747	4.09116	32.4647	5.1003e-06	7.10646e-05
chr17	32188115	32192568	H3K27ac_44860	0.679246	5.36685	32.4654	5.09946e-06	7.10646e-05
chr9	71958339	71960202	H3K27ac_25686	0.722049	6.69226	32.4515	5.11575e-06	7.12069e-05
chr16	52154766	52156103	H3K27ac_43344	-1.38849	1.98086	32.5714	5.11718e-06	7.12069e-05
chr17	32548508	32549629	H3K27ac_44893	1.15539	2.70813	32.4464	5.12176e-06	7.12242e-05
chr10	57813008	57816092	H3K27ac_27978	-1.07773	3.79137	33.1778	5.14439e-06	7.14922e-05
chr14	21297567	21299346	H3K27ac_38421	0.900143	4.44143	32.559	5.16855e-06	7.17813e-05
chr6	83389154	83394322	H3K27ac_17231	0.734026	6.37312	32.3906	5.18814e-06	7.20065e-05
chr5	111624191	111625418	H3K27ac_14813	-1.12644	2.52819	32.3739	5.20811e-06	7.22367e-05
chr12	74719363	74721906	H3K27ac_34836	0.877963	3.50037	32.3606	5.22421e-06	7.2413e-05
chr7	17366606	17370601	H3K27ac_19166	0.671201	6.26366	32.3516	5.23505e-06	7.25161e-05
chr7	89921371	89923749	H3K27ac_20456	-1.10315	6.0333	37.1248	5.24716e-06	7.26367e-05
chr2	173620126	173621134	H3K27ac_7485	-1.02208	2.98304	32.3229	5.2699e-06	7.29042e-05
chr6	31236575	31238755	H3K27ac_16327	1.02571	2.88439	32.2994	5.29847e-06	7.32207e-05
chr6	124853667	124854586	H3K27ac_18258	0.756904	4.76364	32.2985	5.29963e-06	7.32207e-05
chr4	19496593	19497241	H3K27ac_10559	0.868695	3.71471	32.2871	5.31359e-06	7.33661e-05
chr12	100848995	100850150	H3K27ac_35500	0.922536	3.10839	32.2813	5.32078e-06	7.34178e-05
chr3	130520685	130523108	H3K27ac_9707	-0.88971	3.55269	32.2737	5.33008e-06	7.34987e-05
chr18	39152818	39153730	H3K27ac_46826	0.923172	4.64387	32.9065	5.36768e-06	7.39693e-05
chr9	55944593	55949518	H3K27ac_25057	0.812352	4.49212	32.2221	5.39412e-06	7.42858e-05
chr15	38398822	38400685	H3K27ac_40573	0.830107	5.94883	33.157	5.42665e-06	7.46855e-05
chr3	88296286	88296908	H3K27ac_8695	0.999081	3.53451	32.174	5.45443e-06	7.50194e-05
chr8	96885701	96890777	H3K27ac_23166	0.688571	7.11336	32.1589	5.47356e-06	7.52341e-05
chr18	38539045	38541752	H3K27ac_46801	0.785011	4.5296	32.1505	5.48419e-06	7.53317e-05
chr10	99949513	99949923	H3K27ac_29302	1.1603	2.41869	32.1463	5.48951e-06	7.53564e-05
chr16	5451915	5455033	H3K27ac_42251	-1.0226	3.7225	32.1314	5.50859e-06	7.55696e-05
chr7	82917669	82921995	H3K27ac_20215	0.632475	5.7069	32.1264	5.51492e-06	7.55863e-05
chr17	53733638	53736218	H3K27ac_45647	1.11162	3.1688	32.1432	5.51688e-06	7.55863e-05
chr2	33286311	33287524	H3K27ac_4696	0.763158	4.78123	32.1125	5.5327e-06	7.5743e-05
chr9	56775332	56776695	H3K27ac_25081	0.740711	4.85589	32.1104	5.53542e-06	7.5743e-05
chr3	100305124	100307809	H3K27ac_9087	-1.17789	4.57503	35.112	5.58219e-06	7.63341e-05
chr13	23801818	23802799	H3K27ac_36367	1.03997	3.30565	32.0505	5.61285e-06	7.66551e-05
chr15	100252921	100253492	H3K27ac_42062	0.804507	4.23622	32.0531	5.60956e-06	7.66551e-05
chr2	32736541	32739608	H3K27ac_4673	0.828987	5.68094	32.9789	5.63365e-06	7.68409e-05
chr10	126631861	126633162	H3K27ac_29786	0.749699	4.74698	32.0353	5.63277e-06	7.68409e-05
chr12	3870567	3873127	H3K27ac_33973	0.705558	4.60567	32.023	5.64878e-06	7.6998e-05
chr17	26730152	26735469	H3K27ac_44535	0.713999	6.40181	32.0054	5.67194e-06	7.72644e-05
chr6	42301445	42302421	H3K27ac_16618	1.04473	2.60321	31.9955	5.68504e-06	7.73934e-05
chr7	63113357	63115715	H3K27ac_19793	0.944076	2.95602	31.9658	5.72442e-06	7.78798e-05
chr5	121834433	121836621	H3K27ac_15124	0.634021	5.48956	31.9567	5.73651e-06	7.79783e-05
chr14	58525546	58530075	H3K27ac_39165	-0.884549	5.44737	32.7696	5.73896e-06	7.79783e-05
chr11	75465042	75465847	H3K27ac_31840	0.69973	4.51376	31.9268	5.77656e-06	7.84392e-05
chr1	140453849	140458738	H3K27ac_2379	0.840664	6.38975	32.9866	5.79328e-06	7.86162e-05
chr4	133613321	133615614	H3K27ac_12392	0.693409	5.52434	31.9114	5.79725e-06	7.86202e-05
chr4	89190074	89191796	H3K27ac_11442	1.1726	2.77658	31.9018	5.8103e-06	7.8747e-05
chr8	28086821	28087414	H3K27ac_22199	0.835649	3.75937	31.8893	5.82711e-06	7.87772e-05
chr11	115553927	115555982	H3K27ac_33589	0.948388	3.02375	31.8877	5.82927e-06	7.87772e-05
chr17	47700444	47702609	H3K27ac_45387	0.882015	3.70598	31.8886	5.82816e-06	7.87772e-05
chr18	37973849	37975075	H3K27ac_46768	0.991861	2.90581	31.8865	5.83097e-06	7.87772e-05
chrX	45818809	45820362	H3K27ac_49440	1.05707	2.77474	31.8905	5.82553e-06	7.87772e-05
chr4	106475885	106478019	H3K27ac_11639	-0.626434	5.74194	31.8708	5.85231e-06	7.90154e-05
chr8	86125245	86126801	H3K27ac_22954	1.01662	3.07882	31.86	5.86704e-06	7.91642e-05
chr7	52846565	52848779	H3K27ac_19665	1.16567	4.79153	37.3154	5.87471e-06	7.92176e-05
chr3	104596645	104600526	H3K27ac_9251	0.774024	4.90034	31.8406	5.89358e-06	7.94219e-05
chr6	86548884	86551452	H3K27ac_17302	0.634591	5.46253	31.8302	5.90793e-06	7.95651e-05
chr8	127860349	127862607	H3K27ac_23864	-1.0616	4.04696	32.847	5.92872e-06	7.97818e-05
chr11	71808705	71811256	H3K27ac_31722	0.902514	3.76939	31.8131	5.9315e-06	7.97818e-05
chr13	102530073	102531795	H3K27ac_37900	1.32963	2.49774	32.0266	5.95613e-06	8.00627e-05
chr5	3340960	3345419	H3K27ac_13051	0.657071	7.08828	31.7741	5.98567e-06	8.03586e-05
chr10	59462090	59464101	H3K27ac_28055	0.983678	3.84247	31.7749	5.98458e-06	8.03586e-05
chr4	8686541	8687880	H3K27ac_10383	1.13051	2.22151	31.7665	5.99627e-06	8.04502e-05
chr4	115680089	115684759	H3K27ac_11753	-0.749244	5.23786	31.7408	6.03234e-06	8.08834e-05
chr5	123397920	123402264	H3K27ac_15235	0.73923	6.1485	31.7371	6.03764e-06	8.09037e-05
chr11	94230845	94233673	H3K27ac_32545	1.41106	5.20691	42.4714	6.05766e-06	8.1121e-05
chr12	70515560	70519411	H3K27ac_34707	0.769559	4.56438	31.7194	6.06264e-06	8.11368e-05
chr2	32463527	32464157	H3K27ac_4659	1.03322	2.58649	31.713	6.07157e-06	8.11546e-05
chr6	22357660	22360205	H3K27ac_16155	-0.854636	5.03498	31.7143	6.06981e-06	8.11546e-05
chr7	124523806	124525369	H3K27ac_21128	0.660674	5.97037	31.7083	6.07834e-06	8.11941e-05
chr8	86567570	86569333	H3K27ac_22987	0.875685	4.20687	31.6536	6.15645e-06	8.21861e-05
chr13	117777562	117779347	H3K27ac_38222	1.19809	2.33935	31.6407	6.17502e-06	8.23825e-05
chr1	174442425	174446130	H3K27ac_3206	0.744615	6.19416	31.6356	6.18242e-06	8.23913e-05
chr6	39005434	39006426	H3K27ac_16514	1.18386	2.28463	31.6349	6.1834e-06	8.23913e-05
chr5	121628821	121630231	H3K27ac_15105	1.01344	2.63924	31.6175	6.20865e-06	8.26246e-05
chr11	11578977	11580284	H3K27ac_30212	1.20325	2.33287	31.6195	6.20577e-06	8.26246e-05
chr16	35363439	35363985	H3K27ac_42907	0.71554	4.47422	31.5794	6.26426e-06	8.33128e-05
chr17	24668783	24669956	H3K27ac_44447	0.910578	3.12061	31.5711	6.27648e-06	8.34232e-05
chr4	125936226	125939364	H3K27ac_12017	0.740579	6.48842	31.5486	6.30965e-06	8.38119e-05
chr11	70392348	70395978	H3K27ac_31681	0.723825	6.91259	31.5325	6.33344e-06	8.40757e-05
chr7	105821998	105823800	H3K27ac_20663	1.10669	2.92218	31.5205	6.35125e-06	8.42073e-05
chr8	26197431	26202018	H3K27ac_22128	0.713152	5.16182	31.522	6.34908e-06	8.42073e-05
chr11	86652468	86654460	H3K27ac_32316	1.27654	2.87114	31.5038	6.37611e-06	8.44845e-05
chr6	29477480	29479547	H3K27ac_16205	0.890934	3.77653	31.4971	6.38617e-06	8.45653e-05
chr6	108617466	108618506	H3K27ac_17853	0.897194	3.80258	31.4807	6.41085e-06	8.48395e-05
chr17	32607311	32608762	H3K27ac_44900	1.00836	3.22003	31.4635	6.43668e-06	8.51285e-05
chr16	31069313	31071137	H3K27ac_42720	0.814357	3.70759	31.4529	6.45276e-06	8.52883e-05
chr1	175361149	175363671	H3K27ac_3217	0.71745	5.15832	31.4435	6.46694e-06	8.537e-05
chr18	55146283	55147969	H3K27ac_46995	0.902322	3.89945	31.4449	6.46492e-06	8.537e-05
chr17	29624781	29625180	H3K27ac_44731	1.18898	2.53867	31.4868	6.48974e-06	8.5618e-05
chr16	11500242	11502720	H3K27ac_42373	-1.00689	3.23504	31.4234	6.49754e-06	8.5668e-05
chr10	94454197	94454981	H3K27ac_28988	1.07867	2.90481	31.3721	6.57633e-06	8.66533e-05
chr9	95307890	95308391	H3K27ac_26055	0.989153	3.04891	31.3351	6.63366e-06	8.73364e-05
chr16	32749800	32752091	H3K27ac_42831	-1.14553	3.97308	33.9104	6.63636e-06	8.73364e-05
chr8	123087182	123088364	H3K27ac_23682	0.976784	3.39559	31.3249	6.64963e-06	8.74572e-05
chr11	33909337	33911235	H3K27ac_30634	0.683139	7.91994	31.3186	6.65947e-06	8.75227e-05
chr15	103088704	103089273	H3K27ac_42179	1.05921	2.17499	31.3165	6.66281e-06	8.75227e-05
chr4	57312991	57313274	H3K27ac_11057	0.94205	3.38032	31.3098	6.67337e-06	8.76075e-05
chr2	61327458	61331339	H3K27ac_5103	-0.814016	4.4408	31.2987	6.69079e-06	8.77822e-05
chr16	76338342	76340042	H3K27ac_43617	0.932316	3.09395	31.2903	6.70407e-06	8.79024e-05
chr5	117607726	117610037	H3K27ac_15015	1.18466	3.23672	32.2821	6.70852e-06	8.79068e-05
chr8	35750928	35755245	H3K27ac_22289	0.757997	5.49738	31.2808	6.71907e-06	8.79909e-05
chr17	22451082	22452320	H3K27ac_44388	0.78117	4.25182	31.2707	6.73506e-06	8.81463e-05
chr9	32415916	32417481	H3K27ac_24455	1.02982	3.50585	31.251	6.76632e-06	8.85011e-05
chr3	90048567	90049812	H3K27ac_8808	-1.40481	2.70429	31.6976	6.82194e-06	8.91739e-05
chr18	82644195	82644411	H3K27ac_47629	1.19835	2.46938	31.2128	6.82747e-06	8.91917e-05
chr16	5445083	5447217	H3K27ac_42250	-1.22428	3.28302	31.202	6.84482e-06	8.93637e-05
chr14	62965012	62967248	H3K27ac_39265	1.12272	3.43667	32.0987	6.86468e-06	8.95681e-05
chr3	109142978	109145261	H3K27ac_9442	0.7242	5.53526	31.1344	6.95482e-06	9.06335e-05
chr9	57617244	57619411	H3K27ac_25133	0.99962	3.49076	31.1349	6.95398e-06	9.06335e-05
chr10	62127187	62128863	H3K27ac_28132	0.896889	3.57274	31.126	6.96858e-06	9.07574e-05
chr4	123092324	123093698	H3K27ac_11930	1.32641	2.72482	31.2537	7.05941e-06	9.18283e-05
chr5	65016714	65018029	H3K27ac_13840	1.13995	2.87922	31.0713	7.05919e-06	9.18283e-05
chr4	128933815	128934378	H3K27ac_12089	1.10928	2.1303	31.068	7.06467e-06	9.18408e-05
chr9	95306956	95307613	H3K27ac_26054	0.803788	3.972	31.0424	7.10759e-06	9.23424e-05
chr11	104468731	104472087	H3K27ac_33075	0.776825	6.49339	31.2207	7.12711e-06	9.25397e-05
chr6	128715296	128718359	H3K27ac_18365	-0.723701	5.33092	30.9875	7.20041e-06	9.34346e-05
chr2	68266663	68270040	H3K27ac_5198	0.773971	4.16186	30.9838	7.20673e-06	9.34598e-05
chr7	144345735	144348032	H3K27ac_21682	-1.28101	3.67144	34.3368	7.23533e-06	9.366e-05
chr14	73746730	73752132	H3K27ac_39549	-1.02703	4.99662	32.5151	7.23379e-06	9.366e-05
chr15	97670343	97671372	H3K27ac_41933	1.06925	2.13612	30.9708	7.229e-06	9.366e-05
chr1	107867768	107869460	H3K27ac_1760	0.811983	3.95765	30.9423	7.27782e-06	9.40959e-05
chr2	35315534	35320919	H3K27ac_4784	0.621013	6.42387	30.9442	7.27466e-06	9.40959e-05
chr11	45876074	45877978	H3K27ac_30771	1.10725	3.31313	31.4025	7.30226e-06	9.43548e-05
chr2	168412827	168417509	H3K27ac_7356	0.723222	7.23371	30.9222	7.31259e-06	9.44311e-05
chr15	99200107	99200899	H3K27ac_41996	0.814743	4.15909	30.8906	7.36763e-06	9.50843e-05
chr2	29533274	29535891	H3K27ac_4454	0.78705	3.9246	30.866	7.41076e-06	9.55831e-05
chr1	130140653	130141730	H3K27ac_1979	0.633745	6.42917	30.8615	7.41858e-06	9.56262e-05
chr7	81698866	81700330	H3K27ac_20086	0.692255	5.65688	30.854	7.43187e-06	9.57397e-05
chr6	113624397	113626322	H3K27ac_17933	1.18352	3.36701	32.1366	7.45211e-06	9.59426e-05
chr10	74751408	74753286	H3K27ac_28400	1.12737	2.63716	30.8183	7.49504e-06	9.64371e-05
chr19	47982764	47986586	H3K27ac_48944	0.735857	5.18197	30.8003	7.52705e-06	9.67906e-05
chr5	107663662	107666565	H3K27ac_14657	1.36193	2.87749	31.6686	7.54972e-06	9.70237e-05
chr17	22954393	22955136	H3K27ac_44392	0.969672	2.86684	30.773	7.57602e-06	9.73031e-05
chr15	77723296	77725945	H3K27ac_41325	-0.8318	4.71262	30.7491	7.61923e-06	9.77992e-05
chr7	71302000	71307372	H3K27ac_19894	-0.774812	6.20639	30.7296	7.65458e-06	9.81939e-05
chr18	66607170	66608634	H3K27ac_47227	0.914863	2.98262	30.7239	7.66502e-06	9.82688e-05
chr13	48937472	48939885	H3K27ac_37024	1.33502	2.95022	31.9702	7.73155e-06	9.89435e-05
chr16	38398354	38401305	H3K27ac_42996	0.90419	4.33544	31.0377	7.7242e-06	9.89435e-05
chr18	82670627	82675847	H3K27ac_47644	0.71358	6.20812	30.6886	7.72959e-06	9.89435e-05
chr14	56392124	56394290	H3K27ac_39073	1.63172	2.87583	35.7009	7.8616e-06	0.000100547
chr8	73067599	73069430	H3K27ac_22645	1.39675	2.90758	33.2397	7.95937e-06	0.000101676
chr19	53874091	53876559	H3K27ac_49019	0.987447	4.71557	33.1252	7.95571e-06	0.000101676
chr2	168364391	168365995	H3K27ac_7349	0.8321	3.78785	30.5625	7.96527e-06	0.000101691
chr14	73108737	73110652	H3K27ac_39493	0.711702	7.09533	30.5487	7.99143e-06	0.000101964
chr1	179268776	179269419	H3K27ac_3281	1.07332	2.48869	30.5158	8.05454e-06	0.000102677
chr4	8836361	8842520	H3K27ac_10406	1.16936	6.85333	37.1876	8.05693e-06	0.000102677
chr3	40911191	40912585	H3K27ac_7990	1.3291	2.17736	30.4974	8.0899e-06	0.000103035
chr3	37538872	37539577	H3K27ac_7937	0.790366	4.26895	30.493	8.09836e-06	0.000103081
chr2	71779253	71780516	H3K27ac_5321	-0.816095	3.88944	30.4412	8.19926e-06	0.000104278
chr10	94641429	94644587	H3K27ac_29002	1.35756	3.77254	35.4317	8.20214e-06	0.000104278
chr4	149374982	149376046	H3K27ac_12841	1.13376	2.59768	30.403	8.2745e-06	0.000105047
chr13	52155386	52158305	H3K27ac_37164	0.73278	4.7619	30.4015	8.27739e-06	0.000105047
chr15	79891029	79892437	H3K27ac_41443	0.945927	2.87701	30.4062	8.26817e-06	0.000105047
chr14	66897364	66900159	H3K27ac_39408	0.637096	6.38345	30.3979	8.28453e-06	0.000105075
chr11	57775554	57777260	H3K27ac_31292	0.681299	4.80476	30.3874	8.30548e-06	0.000105278
chr9	40255721	40259196	H3K27ac_24576	0.688991	5.54163	30.3844	8.31133e-06	0.00010529
chr9	63572161	63576380	H3K27ac_25340	0.704368	5.36807	30.378	8.32415e-06	0.000105327
chr11	118063788	118066401	H3K27ac_33757	0.775341	4.75559	30.38	8.32015e-06	0.000105327
chr15	100976175	100976856	H3K27ac_42104	0.944255	2.61166	30.3711	8.33779e-06	0.000105437
chr3	59007190	59009067	H3K27ac_8251	1.24557	2.50414	30.8858	8.36292e-06	0.00010563
chr11	116275271	116276205	H3K27ac_33641	-0.933033	3.1461	30.3589	8.36223e-06	0.00010563
chr9	111177404	111177938	H3K27ac_26449	1.06379	2.28221	30.3532	8.37367e-06	0.000105703
chr2	150694718	150695994	H3K27ac_6685	-1.21321	1.98827	30.3438	8.39243e-06	0.000105878
chr11	4158643	4162940	H3K27ac_29975	0.804503	5.19933	30.7957	8.40609e-06	0.000105987
chr3	122080825	122082363	H3K27ac_9574	1.11762	2.54964	30.3313	8.4176e-06	0.000106007
chr17	23752922	23759305	H3K27ac_44404	-1.06112	6.38459	34.2613	8.41612e-06	0.000106007
chr4	106659719	106661030	H3K27ac_11652	0.932898	2.97727	30.3198	8.44088e-06	0.000106238
chr2	30891301	30894547	H3K27ac_4527	0.76477	5.16626	30.3198	8.52766e-06	0.000107267
chrX	103330408	103332381	H3K27ac_49780	0.985264	2.93937	30.2616	8.55946e-06	0.000107603
chr5	123168058	123170907	H3K27ac_15215	-0.805617	4.8779	30.2522	8.57884e-06	0.000107783
chr2	68309044	68310455	H3K27ac_5205	0.634869	5.26077	30.2165	8.65257e-06	0.000108454
chr7	25214471	25217803	H3K27ac_19260	-0.844054	6.06583	30.2193	8.64661e-06	0.000108454
chr15	68059134	68060156	H3K27ac_41123	1.3329	1.95228	30.2173	8.65088e-06	0.000108454
chr17	88996564	88997638	H3K27ac_46393	0.915144	3.58375	30.2227	8.63973e-06	0.000108454
chr17	31963185	31969608	H3K27ac_44847	0.726725	5.75936	30.1894	8.70897e-06	0.000109097
chr3	100239959	100244352	H3K27ac_9079	0.956112	4.57374	31.7418	8.72795e-06	0.000109271
chr14	73734667	73735478	H3K27ac_39546	-1.05458	2.48229	30.1696	8.75047e-06	0.000109489
chr12	81025784	81027457	H3K27ac_35138	0.931119	3.24412	30.1542	8.7829e-06	0.00010983
chr2	60704563	60707051	H3K27ac_5090	0.882657	3.74267	30.1262	8.84219e-06	0.000110442
chr4	102660721	102664614	H3K27ac_11599	-0.777417	4.09117	30.1282	8.83795e-06	0.000110442
chr16	87708735	87710005	H3K27ac_43719	-1.33022	2.69939	30.0978	8.90278e-06	0.000111134
chr19	53616833	53620240	H3K27ac_49005	0.886378	4.84145	31.1804	8.91036e-06	0.000111163
chr2	48327580	48331294	H3K27ac_4902	-0.99615	3.79884	30.4888	8.9566e-06	0.000111675
chr9	50354745	50357050	H3K27ac_24948	1.34034	4.03331	35.5575	8.97203e-06	0.000111796
chr12	80851828	80853754	H3K27ac_35107	0.859406	3.62788	30.0634	8.97678e-06	0.000111796
chr6	124860279	124862078	H3K27ac_18261	0.791915	4.4345	30.0516	9.00224e-06	0.000112048
chr17	12354993	12359708	H3K27ac_44208	-0.840943	5.02629	30.9097	9.02971e-06	0.000112324
chr5	38944688	38946338	H3K27ac_13597	1.02862	2.04027	30.0362	9.03575e-06	0.000112334
chr2	173209673	173212203	H3K27ac_7462	0.670492	4.81912	30.0294	9.05059e-06	0.000112453
chr11	62637305	62638552	H3K27ac_31466	1.12762	2.3345	30.0202	9.07057e-06	0.000112635
chr13	37917259	37919720	H3K27ac_36673	0.71018	6.23147	30.0172	9.07729e-06	0.000112653
chr9	107514330	107515146	H3K27ac_26274	0.691912	4.58852	30.0067	9.10013e-06	0.000112871
chr1	52077934	52080409	H3K27ac_581	-1.52873	2.93355	32.6787	9.11817e-06	0.000113029
chr7	19929713	19931116	H3K27ac_19210	0.61288	5.95014	29.9898	9.13732e-06	0.000113201
chr17	28144144	28144841	H3K27ac_44606	1.31726	2.59384	30.0824	9.19673e-06	0.000113871
chr19	3321565	3323102	H3K27ac_47747	0.793457	4.03685	29.9456	9.23524e-06	0.000114281
chr2	158538039	158539049	H3K27ac_7004	0.986406	2.41079	29.9326	9.26415e-06	0.000114573
chr7	139970409	139974093	H3K27ac_21638	0.811274	3.7645	29.917	9.2992e-06	0.00011494
chr6	38850192	38851946	H3K27ac_16511	0.978398	2.90706	29.8893	9.36145e-06	0.000115642
chrX	139114288	139117449	H3K27ac_49915	0.679794	5.68153	29.8689	9.40786e-06	0.000116148
chr7	16602968	16605719	H3K27ac_19107	0.784006	3.94824	29.8618	9.42397e-06	0.00011628
chr17	24806014	24807285	H3K27ac_44451	0.641485	5.33961	29.8431	9.46653e-06	0.000116737
chr4	62288039	62293064	H3K27ac_11182	0.723242	5.54625	29.8354	9.48411e-06	0.000116752
chr8	81922004	81923423	H3K27ac_22819	0.685759	4.79665	29.837	9.48048e-06	0.000116752
chr14	66868039	66871526	H3K27ac_39397	0.813979	4.28048	29.8382	9.4778e-06	0.000116752
chr16	24909041	24911669	H3K27ac_42662	-1.02945	3.29116	29.8158	9.52929e-06	0.000117241
chr6	82722631	82723471	H3K27ac_17180	1.04046	2.9765	29.8077	9.54799e-06	0.000117335
chr16	92747004	92749207	H3K27ac_43854	1.00928	2.48075	29.8096	9.54352e-06	0.000117335
chr4	141632198	141634325	H3K27ac_12690	1.01421	3.7463	30.3895	9.63673e-06	0.000118358
chr4	57926939	57929973	H3K27ac_11074	0.771614	4.36688	29.6793	9.84945e-06	0.000120831
chr13	56216509	56218269	H3K27ac_37288	0.932843	3.10117	29.68	9.84784e-06	0.000120831
chr13	102317120	102318801	H3K27ac_37874	1.07973	2.83057	29.6269	9.97538e-06	0.000122306
chr10	7382169	7383720	H3K27ac_26965	0.675153	6.02645	29.6162	1.00012e-05	0.000122552
chr10	3227418	3229042	H3K27ac_26895	0.979472	3.27057	29.5976	1.00466e-05	0.000123006
chr10	118149596	118153068	H3K27ac_29605	-0.991822	4.74831	30.1005	1.00498e-05	0.000123006
chr5	3354351	3357148	H3K27ac_13053	0.751411	4.49017	29.5796	1.00905e-05	0.000123433
chr10	44786987	44787596	H3K27ac_27893	0.798905	4.20237	29.5733	1.01059e-05	0.000123551
chr9	110554307	110557397	H3K27ac_26396	0.659858	6.01644	29.5705	1.0113e-05	0.000123567
chr4	45543816	45544125	H3K27ac_10920	1.00329	3.62785	29.5971	1.01762e-05	0.000124127
chr11	51693993	51695141	H3K27ac_30977	1.09399	2.53934	29.5478	1.01689e-05	0.000124127
chr19	53355548	53357411	H3K27ac_48978	1.93014	2.67401	37.608	1.01743e-05	0.000124127
chr6	146837120	146837417	H3K27ac_18944	0.849133	3.33741	29.5318	1.02083e-05	0.000124447
chr18	70679771	70683856	H3K27ac_47344	-0.701433	5.13042	29.5187	1.0241e-05	0.000124775
chr8	113444057	113444389	H3K27ac_23408	0.888461	2.94322	29.5059	1.0273e-05	0.000125021
chrX	101954800	101956943	H3K27ac_49757	1.04988	2.60375	29.5077	1.02684e-05	0.000125021
chr16	91010206	91012042	H3K27ac_43766	0.655664	6.0865	29.4867	1.0321e-05	0.000125534
chr10	59411789	59412015	H3K27ac_28046	1.15815	2.39122	29.4765	1.03466e-05	0.000125774
chr1	172103809	172105114	H3K27ac_3057	0.60301	5.82174	29.4622	1.03827e-05	0.000125963
chr6	136379363	136380718	H3K27ac_18604	1.06869	2.28782	29.4569	1.03961e-05	0.000125963
chr7	132627050	132640373	H3K27ac_21301	-0.767587	8.77586	29.4668	1.03711e-05	0.000125963
chr13	114369052	114371837	H3K27ac_38164	-0.667904	5.31017	29.4585	1.0392e-05	0.000125963
chr14	58367989	58369156	H3K27ac_39144	-1.26515	2.92937	30.3879	1.03976e-05	0.000125963
chr17	47651415	47653979	H3K27ac_45375	0.797116	5.1849	29.9603	1.03802e-05	0.000125963
chr10	59358732	59360619	H3K27ac_28033	0.61424	6.01217	29.4366	1.04475e-05	0.000126496
chr11	78660534	78662830	H3K27ac_32021	1.13146	3.27322	30.2924	1.0518e-05	0.000127277
chr1	60466459	60467134	H3K27ac_919	0.831188	4.12622	29.4032	1.05329e-05	0.000127386
chr13	49282102	49283510	H3K27ac_37049	0.640715	6.39698	29.3708	1.06163e-05	0.000128322
chr1	184212154	184213162	H3K27ac_3465	0.659517	5.53946	29.3481	1.06754e-05	0.000128963
chr11	96974018	96977443	H3K27ac_32665	0.718783	5.69201	29.3301	1.07224e-05	0.000129457
chr11	115538531	115541648	H3K27ac_33578	0.952007	2.84529	29.3264	1.07321e-05	0.000129501
chrX	153928699	153930414	H3K27ac_49966	0.66324	5.2469	29.3201	1.07486e-05	0.000129627
chr16	95409546	95412191	H3K27ac_43976	-0.749772	5.05107	29.2664	1.08905e-05	0.000131264
chr2	13676589	13684108	H3K27ac_4118	-1.28159	6.38789	36.5498	1.09213e-05	0.000131413
chr7	52124702	52125741	H3K27ac_19629	0.753346	4.10318	29.2553	1.092e-05	0.000131413
chr17	56159716	56164192	H3K27ac_45674	0.729703	5.05951	29.2562	1.09175e-05	0.000131413
chr2	68795414	68799311	H3K27ac_5214	-1.15449	5.86323	30.2755	1.09321e-05	0.000131468
chr11	115370933	115372171	H3K27ac_33548	1.09134	2.73862	29.2396	1.0962e-05	0.0001317
chr15	78750037	78751318	H3K27ac_41375	1.233	2.72945	30.1221	1.09637e-05	0.0001317
chr10	39133825	39139161	H3K27ac_27611	0.695352	4.46207	29.2052	1.10546e-05	0.000132717
chr2	168316120	168318829	H3K27ac_7342	1.03694	3.95604	30.5498	1.10827e-05	0.00013298
chr6	108483782	108489029	H3K27ac_17834	0.927054	6.10929	32.1185	1.11241e-05	0.000133402
chr19	47990042	47994841	H3K27ac_48946	0.629226	6.82731	29.1716	1.11456e-05	0.000133585
chr19	10874651	10876851	H3K27ac_48063	0.93086	3.22773	29.1682	1.11552e-05	0.000133624
chr2	48170396	48172602	H3K27ac_4887	-0.955927	3.40617	29.1427	1.12248e-05	0.000134374
chr12	106246529	106248304	H3K27ac_35690	0.7438	5.28537	29.1407	1.12304e-05	0.000134374
chr9	119982134	119984995	H3K27ac_26693	-0.714228	5.52329	29.1288	1.12632e-05	0.000134616
chr19	29138233	29140036	H3K27ac_48368	0.676221	4.78053	29.1302	1.12593e-05	0.000134616
chr15	93127638	93130332	H3K27ac_41777	-1.11915	3.11482	29.5338	1.128e-05	0.000134742
chr2	31318564	31320662	H3K27ac_4577	-0.913993	4.18939	29.5231	1.12917e-05	0.000134806
chr10	120062074	120063418	H3K27ac_29663	-1.17887	2.18037	29.1046	1.13302e-05	0.00013519
chr13	96094904	96095799	H3K27ac_37716	-0.878708	3.51351	29.0893	1.13727e-05	0.000135621
chr7	124525472	124526181	H3K27ac_21129	1.0217	2.44792	29.0833	1.13894e-05	0.000135669
chr18	80878827	80883927	H3K27ac_47577	0.660085	6.28715	29.0854	1.13837e-05	0.000135669
chr14	56406776	56408001	H3K27ac_39075	0.928187	3.55409	29.0684	1.14312e-05	0.000136091
chr2	27273148	27274909	H3K27ac_4385	1.13664	3.03982	29.5352	1.14906e-05	0.00013667
chr3	129360668	129362498	H3K27ac_9683	1.00692	3.24061	29.0465	1.14927e-05	0.00013667
chr9	112076769	112078750	H3K27ac_26454	0.997839	4.00876	29.3852	1.15018e-05	0.000136702
chr2	3572235	3577476	H3K27ac_3729	0.888746	5.93316	31.4526	1.1516e-05	0.000136795
chr2	6133815	6134305	H3K27ac_3802	0.958159	2.80734	29.0168	1.15766e-05	0.000137362
chr9	32419413	32425868	H3K27ac_24458	-0.788294	6.3666	29.5705	1.15704e-05	0.000137362
chr11	113062570	113063250	H3K27ac_33477	0.976274	3.44029	28.9997	1.16256e-05	0.000137866
chr6	134097347	134099411	H3K27ac_18475	0.845687	4.32368	28.9945	1.16404e-05	0.000137965
chr10	81703386	81704329	H3K27ac_28687	0.826689	3.85374	28.9491	1.17708e-05	0.000139433
chr7	88219124	88221025	H3K27ac_20423	0.977748	4.78718	31.3634	1.1804e-05	0.00013975
chr17	73435754	73437467	H3K27ac_45914	0.85598	3.55577	28.9217	1.18503e-05	0.00014022
chr3	126311694	126314951	H3K27ac_9601	0.848069	3.95548	28.9179	1.18615e-05	0.000140275
chr7	52273153	52274040	H3K27ac_19637	0.787545	4.2963	28.912	1.18785e-05	0.000140398
chr1	39336928	39339393	H3K27ac_343	-0.860646	5.18877	29.018	1.19242e-05	0.000140859
chr4	135450387	135455457	H3K27ac_12503	-0.696665	6.32284	28.8896	1.19443e-05	0.00014102
chr9	69290134	69292153	H3K27ac_25597	0.927302	2.86882	28.8483	1.20662e-05	0.00014238
chr14	58234651	58236028	H3K27ac_39130	-1.18962	2.49037	28.8312	1.21172e-05	0.000142827
chr17	35182715	35183686	H3K27ac_45047	0.802798	4.63335	28.8311	1.21174e-05	0.000142827
chr8	73207256	73210062	H3K27ac_22660	-0.758946	4.48573	28.8165	1.21614e-05	0.000143265
chr17	29625265	29627454	H3K27ac_44732	0.6293	7.50046	28.8105	1.21791e-05	0.000143395
chr19	53357467	53360472	H3K27ac_48979	1.79157	3.25872	37.0839	1.21964e-05	0.000143519
chr9	14183472	14185814	H3K27ac_24187	0.772691	5.80928	29.3846	1.22418e-05	0.000143974
chr5	143686211	143689925	H3K27ac_15757	0.725388	5.89475	28.7819	1.22653e-05	0.000144171
chr14	26278050	26278582	H3K27ac_38497	1.02437	2.99323	28.7705	1.23e-05	0.000144499
chr9	40866285	40868382	H3K27ac_24596	1.13877	2.67745	28.9415	1.23296e-05	0.000144768
chr4	132211115	132216752	H3K27ac_12250	-0.913325	5.98919	31.2877	1.23572e-05	0.000145012
chr9	32401854	32404794	H3K27ac_24453	-0.627812	5.97443	28.7073	1.24933e-05	0.000146529
chr11	87800205	87801025	H3K27ac_32394	0.74822	4.42227	28.6979	1.25221e-05	0.000146786
chr10	30256535	30258982	H3K27ac_27509	-1.11849	3.15811	28.6776	1.25853e-05	0.000147445
chr6	15670275	15673127	H3K27ac_16091	0.732944	6.62459	28.7491	1.25941e-05	0.000147468
chr9	116061359	116064272	H3K27ac_26580	0.870188	3.91819	28.6663	1.26205e-05	0.000147695
chr6	108256261	108257965	H3K27ac_17783	1.10416	3.26681	29.2256	1.26759e-05	0.000148263
chr4	133169293	133171868	H3K27ac_12330	0.692606	4.33256	28.6443	1.26892e-05	0.000148337
chr3	30996911	30997262	H3K27ac_7829	0.930862	2.39708	28.6326	1.2726e-05	0.000148628
chr7	26558977	26560727	H3K27ac_19341	0.859221	3.78287	28.632	1.2728e-05	0.000148628
chr3	38177633	38181794	H3K27ac_7969	-1.10303	3.70749	28.6271	1.27432e-05	0.000148724
chr19	4125214	4127893	H3K27ac_47781	0.627303	6.23995	28.6146	1.27828e-05	0.000149105
chr9	68919718	68922412	H3K27ac_25551	0.724904	4.05227	28.6077	1.28046e-05	0.000149141
chr13	93842496	93844660	H3K27ac_37673	-1.14263	3.40167	28.6084	1.28022e-05	0.000149141
chr18	50181271	50185836	H3K27ac_46939	0.677713	4.81697	28.6048	1.28138e-05	0.000149141
chr18	82693884	82699251	H3K27ac_47650	0.659059	6.50783	28.6066	1.2808e-05	0.000149141
chr1	55462752	55464066	H3K27ac_794	0.787969	5.22926	29.1401	1.28213e-05	0.000149146
chr3	95789248	95791898	H3K27ac_8968	0.779194	4.29138	28.5926	1.28525e-05	0.000149346
chr3	137661410	137666378	H3K27ac_9951	0.716382	4.6071	28.594	1.2848e-05	0.000149346
chr6	108489196	108494431	H3K27ac_17835	1.71767	5.15599	44.0566	1.30022e-05	0.000151004
chr11	98819937	98823627	H3K27ac_32801	0.662299	7.20502	28.5396	1.30222e-05	0.000151154
chr14	76981289	76982543	H3K27ac_39678	-1.35519	2.61864	29.5151	1.30639e-05	0.000151556
chr9	119364712	119365968	H3K27ac_26671	0.90603	2.59471	28.5125	1.31099e-05	0.000152007
chr4	114658640	114660183	H3K27ac_11738	0.629512	6.5998	28.492	1.31766e-05	0.000152697
chr8	74060748	74062561	H3K27ac_22698	0.652287	5.5559	28.4877	1.31909e-05	0.000152779
chr5	37446803	37449224	H3K27ac_13584	-0.987475	3.86414	28.4772	1.32252e-05	0.000153094
chr19	29491686	29494449	H3K27ac_48441	0.644444	5.6091	28.4605	1.328e-05	0.000153645
chr4	140369717	140373145	H3K27ac_12638	0.64374	6.12573	28.4521	1.33077e-05	0.000153715
chr11	45873314	45875297	H3K27ac_30769	0.885556	3.69157	28.4544	1.33001e-05	0.000153715
chrX	163098660	163101092	H3K27ac_50105	0.785383	4.54157	28.4536	1.33027e-05	0.000153715
chr7	142796111	142797604	H3K27ac_21661	1.02211	2.65789	28.4379	1.33547e-05	0.000154091
chr15	97655165	97656832	H3K27ac_41929	0.67513	4.97976	28.4399	1.33481e-05	0.000154091
chr12	17553672	17555579	H3K27ac_34163	0.830651	3.74705	28.416	1.34274e-05	0.000154763
chr13	98011155	98013415	H3K27ac_37793	0.882949	4.67459	28.6171	1.34235e-05	0.000154763
chr15	66649373	66650692	H3K27ac_41065	0.972783	3.43534	28.402	1.34741e-05	0.000155218
chr11	61482444	61484134	H3K27ac_31432	0.946989	3.63914	28.398	1.34877e-05	0.00015529
chr19	10886817	10906775	H3K27ac_48068	0.782392	8.40453	28.4065	1.35147e-05	0.000155517
chr6	72583996	72587089	H3K27ac_17145	-0.901105	4.09631	28.3842	1.35339e-05	0.000155654
chr8	13287161	13288467	H3K27ac_22001	0.620509	5.71533	28.3711	1.35781e-05	0.000156079
chr2	169982140	169986512	H3K27ac_7396	0.894942	5.18408	30.264	1.3595e-05	0.000156188
chr6	113432701	113434161	H3K27ac_17916	0.707659	4.96162	28.3628	1.3606e-05	0.000156231
chr7	117400327	117402380	H3K27ac_20994	1.02587	3.66116	29.1841	1.36304e-05	0.000156428
chr6	125376672	125376937	H3K27ac_18301	0.997452	2.76055	28.351	1.36461e-05	0.000156466
chr11	115032421	115037681	H3K27ac_33515	0.611282	7.15411	28.3503	1.36485e-05	0.000156466
chr5	100894487	100897716	H3K27ac_14395	-1.01598	3.34461	28.3918	1.36725e-05	0.000156574
chr16	84702953	84705505	H3K27ac_43680	0.594307	5.49218	28.344	1.36699e-05	0.000156574
chr10	82615452	82617515	H3K27ac_28718	-1.0592	3.5989	28.3237	1.37389e-05	0.00015725
chr6	34851659	34853146	H3K27ac_16376	-0.955742	2.6894	28.2767	1.39006e-05	0.000159016
chr19	29325196	29328856	H3K27ac_48395	0.631548	7.52579	28.2625	1.395e-05	0.000159495
chr7	148171652	148178225	H3K27ac_21770	1.25699	5.74939	36.5772	1.40083e-05	0.000160075
chr10	66945783	66947595	H3K27ac_28221	1.00093	2.50102	28.2228	1.40887e-05	0.000160822
chr13	91599562	91602143	H3K27ac_37632	0.689294	6.61504	28.2246	1.40821e-05	0.000160822
chr14	33596942	33601413	H3K27ac_38724	0.858833	3.695	28.1905	1.42025e-05	0.000162035
chr3	107433723	107435257	H3K27ac_9377	0.604141	5.31411	28.1805	1.42379e-05	0.000162352
chr16	95505015	95506628	H3K27ac_43985	-1.08198	2.61632	28.1158	1.44697e-05	0.000164907
chr15	79764630	79765836	H3K27ac_41437	1.08383	3.10114	28.2906	1.44866e-05	0.000165011
chr10	126506077	126508186	H3K27ac_29766	0.787587	4.02578	28.1038	1.4513e-05	0.000165224
chr11	109235998	109240253	H3K27ac_33386	0.74014	4.8099	28.0796	1.46012e-05	0.000166139
chr3	102559245	102560914	H3K27ac_9167	0.874664	3.18841	28.077	1.46105e-05	0.000166157
chr7	106976295	106977335	H3K27ac_20733	0.73301	4.28723	28.0722	1.46281e-05	0.000166269
chr3	8717025	8719011	H3K27ac_7598	-0.922353	3.60046	28.0689	1.46403e-05	0.000166318
chr2	167414083	167415387	H3K27ac_7288	0.672269	5.39679	28.0375	1.47555e-05	0.000167517
chr5	114356905	114358764	H3K27ac_14867	0.615887	6.27402	28.0359	1.47615e-05	0.000167517
chr7	108688304	108690520	H3K27ac_20828	0.956541	3.49786	28.0263	1.47969e-05	0.00016774
chr8	75015431	75016619	H3K27ac_22770	0.662615	5.72125	28.0275	1.47925e-05	0.00016774
chr6	108273289	108279936	H3K27ac_17788	0.908566	5.4214	30.6357	1.48793e-05	0.000168585
chr11	4188275	4190137	H3K27ac_29981	0.846461	4.40027	28.0249	1.49802e-05	0.000169638
chr6	97422540	97424082	H3K27ac_17563	1.15111	2.13924	27.9648	1.50267e-05	0.000170046
chr12	74875673	74883074	H3K27ac_34882	0.810309	5.54473	29.052	1.50322e-05	0.000170046
chr10	94876514	94881005	H3K27ac_29036	1.16915	7.45382	34.2719	1.5076e-05	0.000170452
chr2	167734923	167736361	H3K27ac_7313	0.895128	3.02701	27.9174	1.52061e-05	0.000171832
chr15	80395396	80396175	H3K27ac_41476	1.21315	1.9172	27.8823	1.53407e-05	0.000173169
chr17	27956078	27957618	H3K27ac_44598	0.722005	5.93116	27.8823	1.53403e-05	0.000173169
chr18	68277600	68280465	H3K27ac_47297	0.953473	3.75388	28.1798	1.54195e-05	0.000173967
chr1	129239505	129243508	H3K27ac_1942	0.658682	4.64937	27.8575	1.54361e-05	0.000174062
chr6	125016962	125018736	H3K27ac_18271	1.00444	4.17009	29.3908	1.54552e-05	0.000174124
chr14	28060878	28064412	H3K27ac_38566	0.683001	5.51482	27.8519	1.5458e-05	0.000174124
chr15	76372484	76373822	H3K27ac_41255	0.907913	3.46902	27.8486	1.54709e-05	0.000174178
chr17	27915683	27918391	H3K27ac_44592	1.05671	2.84406	27.8067	1.56343e-05	0.000175925
chr9	45082043	45083459	H3K27ac_24824	1.1306	2.24117	27.8004	1.56594e-05	0.000175965
chr10	127101739	127102354	H3K27ac_29802	1.00079	2.91944	27.7995	1.56626e-05	0.000175965
chr10	127631489	127632385	H3K27ac_29833	0.589868	5.23702	27.8015	1.56547e-05	0.000175965
chr6	120071839	120075845	H3K27ac_18112	-0.744089	4.687	27.7948	1.56811e-05	0.00017608
chr5	141240429	141242033	H3K27ac_15692	0.994326	3.02285	27.7757	1.57569e-05	0.000176839
chr14	18813975	18815135	H3K27ac_38364	-1.10779	2.18951	27.7629	1.58074e-05	0.000177312
chr11	86780413	86782952	H3K27ac_32333	0.800045	4.0622	27.6958	1.60767e-05	0.000180238
chr2	31467693	31470009	H3K27ac_4580	0.752664	4.38126	27.6743	1.61637e-05	0.000181119
chr12	100847051	100848725	H3K27ac_35499	0.940241	3.18033	27.6515	1.62571e-05	0.00018207
chr15	78434830	78439564	H3K27ac_41364	0.642744	5.81061	27.6437	1.6289e-05	0.000182331
chr11	57951349	57954655	H3K27ac_31316	-1.00754	4.2358	27.6353	1.63236e-05	0.000182622
chr10	74816367	74818055	H3K27ac_28408	1.08406	2.51077	27.6187	1.6392e-05	0.000183291
chr8	24365573	24367580	H3K27ac_22100	0.633339	5.21072	27.5899	1.65116e-05	0.000184482
chr14	76979085	76980966	H3K27ac_39677	-1.03702	3.31477	27.5889	1.65158e-05	0.000184482
chr1	40141140	40145062	H3K27ac_411	-0.789806	4.40148	27.5726	1.65839e-05	0.000185146
chr11	53892980	53895405	H3K27ac_31108	1.32367	3.25246	27.5699	1.6595e-05	0.000185173
chr3	105712397	105714656	H3K27ac_9310	0.778137	4.17228	27.5611	1.6632e-05	0.000185393
chr11	116261552	116262540	H3K27ac_33638	1.02505	2.03396	27.5624	1.66264e-05	0.000185393
chr12	3806494	3807832	H3K27ac_33967	0.713191	5.12546	27.559	1.66409e-05	0.000185395
chr10	79516278	79518264	H3K27ac_28558	0.647629	6.74047	27.556	1.66532e-05	0.000185435
chr11	62094377	62095500	H3K27ac_31445	0.593759	5.6833	27.5464	1.66936e-05	0.000185788
chr7	87779584	87783893	H3K27ac_20363	0.910781	4.80753	28.8908	1.67692e-05	0.000186532
chr4	88806880	88811206	H3K27ac_11421	0.823512	5.1211	28.5835	1.6785e-05	0.000186611
chr7	29604672	29607092	H3K27ac_19421	0.737038	5.30081	27.6849	1.68157e-05	0.000186855
chr10	94726605	94731412	H3K27ac_29014	0.880382	6.23196	29.9181	1.6873e-05	0.000187393
chr14	66915248	66916987	H3K27ac_39409	0.670096	5.43529	27.4853	1.69535e-05	0.00018819
chr8	73356691	73357782	H3K27ac_22674	0.851493	4.01674	27.47	1.70191e-05	0.00018882
chr15	67008535	67009720	H3K27ac_41109	0.802524	4.68368	27.5494	1.70508e-05	0.000189074
chr14	26311362	26313723	H3K27ac_38507	0.780139	4.04157	27.4537	1.70895e-05	0.000189404
chr3	27218589	27227302	H3K27ac_7767	0.664158	5.28505	27.4381	1.7157e-05	0.000190054
chr10	59104732	59106782	H3K27ac_28022	-0.793999	3.69169	27.4333	1.71778e-05	0.000190185
chr8	35007085	35009414	H3K27ac_22239	0.88576	3.22966	27.4261	1.72092e-05	0.000190434
chr12	109686967	109688301	H3K27ac_35789	-1.05962	2.72819	27.4233	1.72217e-05	0.000190473
chr5	137735063	137735708	H3K27ac_15573	0.788088	3.76191	27.3998	1.73244e-05	0.000191504
chr9	36533766	36535161	H3K27ac_24543	0.658393	4.66612	27.3978	1.73328e-05	0.000191504
chr4	15884943	15885732	H3K27ac_10547	0.631031	6.45366	27.395	1.73454e-05	0.000191544
chr5	8797893	8799116	H3K27ac_13134	0.630978	5.02521	27.3842	1.73928e-05	0.000191968
chr11	106553928	106557739	H3K27ac_33190	-0.88684	3.4687	27.3813	1.74057e-05	0.000192011
chr7	25903928	25907989	H3K27ac_19295	0.984414	7.52315	30.6368	1.74507e-05	0.000192347
chr19	53621812	53623239	H3K27ac_49007	0.962093	3.04446	27.3703	1.74541e-05	0.000192347
chr17	50470393	50471768	H3K27ac_45475	0.924889	3.19079	27.3619	1.74912e-05	0.000192656
chr14	61143302	61145348	H3K27ac_39195	-0.93692	2.58828	27.2989	1.77732e-05	0.000195661
chr1	158451463	158452733	H3K27ac_2699	-0.920297	3.9765	27.2934	1.77978e-05	0.00019573
chr5	64484145	64484802	H3K27ac_13793	0.787173	3.76543	27.295	1.77907e-05	0.00019573
chr17	34325793	34326767	H3K27ac_44988	0.858319	4.08186	27.287	1.78269e-05	0.000195949
chr2	93282791	93303727	H3K27ac_5784	0.67886	9.19986	27.2579	1.79592e-05	0.000197302
chr12	33865987	33869620	H3K27ac_34389	0.61788	5.67356	27.2519	1.79863e-05	0.000197466
chr19	44462252	44463703	H3K27ac_48826	0.711694	4.71109	27.2505	1.79927e-05	0.000197466
chr7	148178563	148179955	H3K27ac_21771	0.89167	3.07976	27.2475	1.80065e-05	0.000197516
chr4	33163072	33165955	H3K27ac_10712	-1.10552	4.12488	27.1791	1.83221e-05	0.000200772
chr10	127091923	127092797	H3K27ac_29799	0.915774	2.27546	27.1804	1.83162e-05	0.000200772
chr9	50816151	50817205	H3K27ac_24979	0.612119	6.13422	27.1657	1.83849e-05	0.000201357
chr1	167598155	167603174	H3K27ac_2991	0.637053	5.12242	27.1573	1.8424e-05	0.000201682
chr11	51573130	51575647	H3K27ac_30959	-0.760393	4.56601	27.1541	1.84393e-05	0.000201746
chr6	47298280	47301195	H3K27ac_16632	1.00376	4.1	27.1799	1.85298e-05	0.000202631
chr10	82352228	82357523	H3K27ac_28709	-0.800543	5.17975	27.1575	1.85966e-05	0.000203258
chr1	46950732	46952574	H3K27ac_538	-0.90333	3.92458	27.1031	1.868e-05	0.000204065
chr6	134014526	134021555	H3K27ac_18445	0.699679	5.63358	27.0973	1.8708e-05	0.000204266
chr4	10934936	10935386	H3K27ac_10448	0.769125	3.86465	27.0906	1.87397e-05	0.000204299
chr9	44888889	44892613	H3K27ac_24804	-0.965387	3.67385	27.3513	1.87271e-05	0.000204299
chr10	93002433	93004439	H3K27ac_28922	-0.666118	5.61133	27.0913	1.87366e-05	0.000204299
chr8	118265829	118267899	H3K27ac_23574	0.980015	3.23479	27.0833	1.87745e-05	0.000204574
chr4	144487845	144489401	H3K27ac_12715	0.878078	3.56655	27.0597	1.88877e-05	0.000205703
chr5	65891000	65892620	H3K27ac_13907	-1.50029	2.44284	27.0554	1.89088e-05	0.000205827
chr14	41747844	41754771	H3K27ac_38755	0.657245	5.16306	27.0428	1.89697e-05	0.000206384
chr14	15464196	15467640	H3K27ac_38325	0.663039	5.72233	27.0346	1.9009e-05	0.000206707
chr7	29727616	29732138	H3K27ac_19430	0.816513	4.83768	27.5027	1.90979e-05	0.000207357
chr14	78846757	78849343	H3K27ac_39741	0.7386	4.30021	27.0176	1.90917e-05	0.000207357
chr17	6946597	6949557	H3K27ac_44144	0.682298	6.17946	27.0181	1.90896e-05	0.000207357
chr1	158915522	158917594	H3K27ac_2726	0.86655	5.00946	28.6621	1.91108e-05	0.000207391
chr4	61947461	61948235	H3K27ac_11154	0.847034	3.56669	26.9911	1.92215e-05	0.000208363
chr11	96984783	96990791	H3K27ac_32666	0.666426	6.41704	26.9925	1.92147e-05	0.000208363
chr15	100066007	100068233	H3K27ac_42049	1.1121	2.40469	26.9894	1.92296e-05	0.000208363
chr17	87199889	87203426	H3K27ac_46297	0.944759	4.51714	27.3226	1.92824e-05	0.000208829
chr7	3289306	3290434	H3K27ac_18992	0.82081	3.5485	26.9712	1.93192e-05	0.000209121
chr7	52900111	52900709	H3K27ac_19670	1.03795	2.10189	26.9536	1.94064e-05	0.00020991
chr9	107179964	107185658	H3K27ac_26256	0.595319	7.38689	26.9525	1.94118e-05	0.00020991
chr15	97503746	97507779	H3K27ac_41915	-0.844409	4.96008	28.0479	1.94574e-05	0.000210297
chr2	128137812	128138624	H3K27ac_6363	0.996347	2.50538	26.935	1.9499e-05	0.000210533
chr16	33754982	33756929	H3K27ac_42887	1.00556	3.7258	27.726	1.94961e-05	0.000210533
chr2	27600327	27601159	H3K27ac_4394	1.0504	2.2226	26.9265	1.95411e-05	0.000210882
chr1	184270752	184272838	H3K27ac_3470	0.664978	6.21363	26.9052	1.96479e-05	0.000211927
chr10	80869866	80871498	H3K27ac_28662	0.76077	4.15524	26.8998	1.9675e-05	0.000212112
chr1	184037384	184040188	H3K27ac_3455	0.851873	4.42832	27.4243	1.96912e-05	0.00021218
chr10	80985666	80988464	H3K27ac_28672	0.671475	5.97596	26.8861	1.97442e-05	0.000212643
chr16	38357950	38359821	H3K27ac_42987	0.954599	2.59264	26.8551	1.99012e-05	0.000214226
chr1	52108328	52109350	H3K27ac_587	0.96348	2.34403	26.8409	1.99737e-05	0.000214898
chrX	35826309	35827373	H3K27ac_49372	0.932341	3.06819	26.8292	2.0034e-05	0.000215439
chr9	118659014	118660738	H3K27ac_26651	1.00167	2.0935	26.8083	2.01414e-05	0.000216485
chr6	124848236	124849398	H3K27ac_18256	1.11623	2.19717	26.7995	2.01866e-05	0.000216861
chr3	135297152	135301423	H3K27ac_9836	0.694636	5.32565	26.7714	2.0333e-05	0.000218324
chr17	87580247	87582537	H3K27ac_46320	0.81545	3.6403	26.7559	2.04134e-05	0.000219078
chr2	3669605	3672653	H3K27ac_3745	0.678881	4.70394	26.7527	2.04306e-05	0.000219152
chr6	29476774	29477119	H3K27ac_16204	0.857299	3.48136	26.7472	2.04593e-05	0.000219349
chr11	98823779	98825512	H3K27ac_32802	0.67813	4.47353	26.7423	2.0485e-05	0.000219514
chr17	7152401	7153058	H3K27ac_44168	0.822908	3.5652	26.7356	2.05202e-05	0.000219782
chr3	89034384	89036629	H3K27ac_8736	0.761843	4.37819	26.7228	2.0588e-05	0.000220397
chr9	40999001	41002861	H3K27ac_24618	-0.726291	4.1432	26.6975	2.0722e-05	0.000221721
chr5	125820033	125820859	H3K27ac_15384	1.18628	2.79175	27.3705	2.07854e-05	0.000222287
chr16	20716893	20717739	H3K27ac_42518	0.72502	4.59123	26.683	2.07994e-05	0.000222326
chr6	83403694	83404111	H3K27ac_17233	1.06676	2.20951	26.6758	2.08378e-05	0.000222514
[truncated: 19,348 more rows]
