# Supplementary material for: Foxp3 depends on Ikaros for control of regulatory T cell gene expression and function
Source: eLife. 2024 Apr 24;12:RP91392. doi: 10.7554/eLife.91392 (PMC11042806; doi:10.7554/eLife.91392)
Supplement: Supplementary file 6. — Super-enhancers were annotated to the nearest gene TSS. [file elife-91392-supp6.xlsx]

## Sheet: superenhancer_annotated_cell_sp
Super-enhancer analysis
REGION_ID	CHROM	START	STOP	NUM_LOCI	CONSTITUENT_SIZE	H3K27Ac	input	enhancerRank	h3k27ac_score	cell	geno	gene_name	distance	cell_specificity
67_OCR_77765_lociStitched	chr4	32292845	32527645	67	37541	967517	52031.7	1	1	Naive	IK	Bach2	0	IK_CKO_Naive|IK_CKO_Treg|WT_Naive|WT_Treg
33_OCR_17916_lociStitched	chr11	52067537	52175288	33	18904	662916	48649.6	2	0.670974	Naive	IK	Vdac1	0	IK_CKO_Naive|IK_CKO_Treg|WT_Naive|WT_Treg
34_OCR_112421_lociStitched	chr9	32500463	32574013	34	16523	627087	31060.2	3	0.651051	Naive	IK	Ets1	0	IK_CKO_Naive|IK_CKO_Treg|WT_Naive|WT_Treg
34_OCR_35608_lociStitched	chr14	54783610	54879570	34	15113	578812	35294.1	4	0.593693	Naive	IK	Abhd4	0	IK_CKO_Naive|IK_CKO_Treg|WT_Naive|WT_Treg
34_OCR_92831_lociStitched	chr6	48612963	48698052	34	19313	559707	26326.5	5	0.58262	Naive	IK	Gimap5	0	IK_CKO_Naive|IK_CKO_Treg|WT_Naive|WT_Treg
60_OCR_38515_lociStitched	chr14	122297663	122479106	60	34843	552349	36288.6	6	0.563701	Naive	IK	Timm8a2	0	IK_CKO_Naive|IK_CKO_Treg|WT_Naive|WT_Treg
32_OCR_74812_lociStitched	chr3	130786721	130879450	32	14208	498789	26900.7	7	0.515452	Naive	IK	Lef1	0	IK_CKO_Naive|WT_Naive|WT_Treg
61_OCR_95290_lociStitched	chr6	99114613	99356554	61	32902	484148	28428.1	8	0.497791	Naive	IK	RP23-333F8.1	0	IK_CKO_Naive|IK_CKO_Treg|WT_Naive|WT_Treg
32_OCR_20330_lociStitched	chr11	98953041	99068985	32	21709	454744	31107.8	9	0.462745	Naive	IK	Ccr7	0	IK_CKO_Naive|IK_CKO_Treg|WT_Naive|WT_Treg
41_OCR_101415_lociStitched	chr7	80648210	80799395	41	21347	381032	32988.6	10	0.380173	Naive	IK	U6	0	IK_CKO_Naive|IK_CKO_Treg|WT_Naive|WT_Treg
35_OCR_9473_lociStitched	chr10	13684316	13792447	35	18729	366369	26394.8	11	0.37136	Naive	IK	Gm8330	0	IK_CKO_Naive|IK_CKO_Treg|WT_Naive|WT_Treg
18_OCR_89847_lociStitched	chr5	134682499	134759061	18	10970	358532	29093.6	12	0.359851	Naive	IK	Gtf2i	0	IK_CKO_Naive|IK_CKO_Treg|WT_Naive|WT_Treg
31_OCR_6984_lociStitched	chr1	167693057	167800254	31	19890	361425	32159.1	13	0.359663	Naive	IK	Cd247	0	IK_CKO_Naive|IK_CKO_Treg|WT_Naive|WT_Treg
16_OCR_51078_lociStitched	chr17	51916979	51973711	16	11951	342344	17371.3	14	0.354973	Naive	IK	Satb1	0	IK_CKO_Naive|IK_CKO_Treg|WT_Naive|WT_Treg
72_OCR_24606_lociStitched	chr12	74635656	74866487	72	38495	373692	49605.6	15	0.354005	Naive	IK	Prkch	0	IK_CKO_Naive|IK_CKO_Treg|WT_Naive|WT_Treg
36_OCR_41973_lociStitched	chr15	80360814	80470729	36	16788	334911	20697	16	0.343221	Naive	IK	Grap2	0	IK_CKO_Naive|IK_CKO_Treg|WT_Naive|WT_Treg
34_OCR_47752_lociStitched	chr16	91433600	91561596	34	18172	344629	39704.4	17	0.333075	Naive	IK	Ifngr2	0	IK_CKO_Naive|IK_CKO_Treg|WT_Naive|WT_Treg
27_OCR_79034_lociStitched	chr4	59256810	59354047	27	14115	319754	16190	18	0.331588	Naive	IK	Susd1	0	IK_CKO_Naive|IK_CKO_Treg|WT_Naive|WT_Treg
40_OCR_16498_lociStitched	chr11	11546392	11689075	40	21388	330625	27666.2	19	0.330927	Naive	IK	Ikzf1	0	IK_CKO_Naive|IK_CKO_Treg|WT_Naive|WT_Treg
21_OCR_104295_lociStitched	chr7	135488387	135562347	21	12252	323050	21736.8	20	0.329129	Naive	IK	Gm15503	0	IK_CKO_Naive|IK_CKO_Treg|WT_Naive|WT_Treg
19_OCR_56589_lociStitched	chr18	75481608	75554762	19	11173	323802	31470.9	21	0.319318	Naive	IK	Smad7	0	IK_CKO_Naive|IK_CKO_Treg|WT_Naive|WT_Treg
45_OCR_20466_lociStitched	chr11	100665638	100845021	45	25467	340935	53868.7	22	0.313568	Naive	IK	Ptrf	0	IK_CKO_Naive|IK_CKO_Treg|WT_Naive|WT_Treg
27_OCR_101216_lociStitched	chr7	75394401	75474641	27	16385	303588	23398	23	0.306056	Naive	IK	Fam169b	0	IK_CKO_Naive|IK_CKO_Treg|WT_Naive|WT_Treg
59_OCR_7840_lociStitched	chr1	182178087	182365352	59	27366	335860	56722.6	24	0.304906	Naive	IK	Itpkb	0	IK_CKO_Naive|IK_CKO_Treg|WT_Naive|WT_Treg
27_OCR_57576_lociStitched	chr19	4112946	4242821	27	18802	342441	64820.6	25	0.30325	Naive	IK	Pold4	0	IK_CKO_Naive|IK_CKO_Treg|WT_Naive|WT_Treg
35_OCR_60333_lociStitched	chr2	11057334	11160248	35	19572	293964	16383.9	26	0.303205	Naive	IK	Prkcq	0	IK_CKO_Naive|IK_CKO_Treg|WT_Naive|WT_Treg
41_OCR_100964_lociStitched	chr7	71021536	71206715	41	27225	327285	50887.2	27	0.301914	Naive	IK	RP24-292K9.1	0	IK_CKO_Naive|IK_CKO_Treg|WT_Naive|WT_Treg
25_OCR_116099_lociStitched	chr9	115993271	116099425	25	17705	296435	23831.6	28	0.297769	Naive	IK	Tgfbr2	0	IK_CKO_Naive|IK_CKO_Treg|WT_Naive|WT_Treg
24_OCR_41696_lociStitched	chr15	77605859	77694425	24	12760	299938	38526.2	29	0.285544	Naive	IK	U6	0	IK_CKO_Naive|IK_CKO_Treg|WT_Naive|WT_Treg
33_OCR_74161_lociStitched	chr3	115363576	115482433	33	17404	277293	17650.3	30	0.283613	Naive	IK	Gm9889	0	IK_CKO_Naive|IK_CKO_Treg|WT_Naive|WT_Treg
22_OCR_97885_lociStitched	chr6	142857394	142913952	22	13439	273090	13607.9	31	0.283437	Naive	IK	St8sia1	0	IK_CKO_Naive|IK_CKO_Treg|WT_Naive|WT_Treg
35_OCR_50274_lociStitched	chr17	35293108	35412145	35	21671	315020	57435.4	32	0.281364	Naive	IK	H2-D1	0	IK_CKO_Naive|IK_CKO_Treg|WT_Naive|WT_Treg
33_OCR_99186_lociStitched	chr7	25149874	25267469	33	18235	307793	53717.4	33	0.277531	Naive	IK	Cadm4	0	IK_CKO_Naive|IK_CKO_Treg|WT_Naive|WT_Treg
35_OCR_26442_lociStitched	chr12	109146757	109247707	35	17293	301326	47587.8	34	0.277162	Naive	IK	Bcl11b	0	IK_CKO_Naive|IK_CKO_Treg|WT_Naive|WT_Treg
30_OCR_109996_lociStitched	chr8	114045485	114129171	30	14394	267226	16879.5	35	0.273458	Naive	IK	Znrf1	0	IK_CKO_Naive|IK_CKO_Treg|WT_Naive|WT_Treg
32_OCR_17630_lociStitched	chr11	46114344	46219004	32	16273	267469	19267.9	36	0.271114	Naive	IK	Fam71b	0	IK_CKO_Naive|IK_CKO_Treg|WT_Naive|WT_Treg
12_OCR_96280_lociStitched	chr6	117829041	117894244	12	9463	265748	23636.1	37	0.264463	Naive	IK	AC153918.1	0	IK_CKO_Naive|IK_CKO_Treg|WT_Naive|WT_Treg
25_OCR_19674_lociStitched	chr11	87492089	87585069	25	12687	275184	37647.6	38	0.259465	Naive	IK	Bzrap1	0	IK_CKO_Naive|IK_CKO_Treg|WT_Naive|WT_Treg
18_OCR_73182_lociStitched	chr3	95428631	95497878	18	12251	257336	27601.9	39	0.250942	Naive	IK	Adamtsl4	0	IK_CKO_Naive|IK_CKO_Treg|WT_Naive|WT_Treg
12_OCR_52832_lociStitched	chr17	84705496	84735889	12	5959	236606	7513.15	40	0.250243	Naive	IK	U6	18408	IK_CKO_Naive|IK_CKO_Treg|WT_Naive|WT_Treg
14_OCR_61532_lociStitched	chr2	31892798	31940497	14	7665	247668	21512.2	41	0.247033	Naive	IK	Fam78a	0	IK_CKO_Naive|IK_CKO_Treg|WT_Naive|WT_Treg
25_OCR_15702_lociStitched	chr10	126541175	126633117	25	16483	261786	37346.8	42	0.245159	Naive	IK	F420014N23Rik	0	IK_CKO_Naive|IK_CKO_Treg|WT_Naive|WT_Treg
29_OCR_992_lociStitched	chr1	36281599	36383275	29	15597	257555	34458	43	0.243693	Naive	IK	Arid5a	0	IK_CKO_Naive|IK_CKO_Treg|WT_Naive|WT_Treg
25_OCR_89308_lociStitched	chr5	124423130	124486767	25	13356	258996	37965.8	44	0.241435	Naive	IK	Vps37b	0	IK_CKO_Naive|IK_CKO_Treg|WT_Naive|WT_Treg
14_OCR_108152_lociStitched	chr8	74842492	74890448	14	8620	241660	21196.6	45	0.240816	Naive	IK	Klf2	0	IK_CKO_Naive|IK_CKO_Treg|WT_Naive|WT_Treg
54_OCR_46214_lociStitched	chr16	52031106	52244337	54	28930	239672	23092.9	46	0.236573	Naive	IK	Cblb	0	IK_CKO_Naive|IK_CKO_Treg|WT_Naive|WT_Treg
15_OCR_112465_lociStitched	chr9	32705019	32754331	15	8293	223502	8940.27	47	0.234369	Naive	IK	Ets1	201391	IK_CKO_Naive|IK_CKO_Treg|WT_Naive|WT_Treg
37_OCR_60763_lociStitched	chr2	18794216	18928013	37	21678	228485	21447.7	48	0.226151	Naive	IK	4930426L09Rik	0	IK_CKO_Naive|IK_CKO_Treg|WT_Naive|WT_Treg
18_OCR_43267_lociStitched	chr15	100531590	100592668	18	10849	228584	22305.7	49	0.225322	Naive	IK	Slc4a8	0	IK_CKO_Naive|IK_CKO_Treg|WT_Naive|WT_Treg
17_OCR_12907_lociStitched	chr10	80105884	80165560	17	9885	246689	43324.8	50	0.222138	Naive	IK	Izumo4	0	IK_CKO_Naive|IK_CKO_Treg|WT_Naive|WT_Treg
15_OCR_99469_lociStitched	chr7	29123139	29178567	15	9044	236944	35019.4	51	0.220565	Naive	IK	Paf1	0	IK_CKO_Naive|IK_CKO_Treg|WT_Naive|WT_Treg
22_OCR_55538_lociStitched	chr18	56572371	56669380	22	12475	213332	13823.8	52	0.217927	Naive	IK	Gramd3	0	IK_CKO_Naive|IK_CKO_Treg|WT_Naive|WT_Treg
24_OCR_52797_lociStitched	chr17	84482689	84566164	24	10722	232328	33231.4	53	0.217476	Naive	IK	Zfp36l2	20312	IK_CKO_Naive|IK_CKO_Treg|WT_Naive|WT_Treg
7_OCR_86429_lociStitched	chr5	65194008	65211021	7	4728	209937	13244.6	54	0.21485	Naive	IK	Klf3	0	IK_CKO_Naive|IK_CKO_Treg|WT_Naive|WT_Treg
27_OCR_20315_lociStitched	chr11	98761772	98852549	27	13659	245988	51243.6	55	0.212722	Naive	IK	Gjd3	0	IK_CKO_Naive|IK_CKO_Treg|WT_Naive|WT_Treg
15_OCR_82373_lociStitched	chr4	133129940	133189853	15	10246	226627	33832.9	56	0.210592	Naive	IK	Zdhhc18	0	IK_CKO_Naive|IK_CKO_Treg|WT_Naive|WT_Treg
26_OCR_41345_lociStitched	chr15	72967572	73016181	26	12424	215440	24076	57	0.20903	Naive	IK	Eif2c2	0	IK_CKO_Naive|IK_CKO_Treg|WT_Naive|WT_Treg
20_OCR_73530_lociStitched	chr3	101069446	101126799	20	9029	211007	21450	58	0.207057	Naive	IK	Gm10355	0	IK_CKO_Naive|IK_CKO_Treg|WT_Naive|WT_Treg
24_OCR_32852_lociStitched	chr13	113166032	113240788	24	13871	198799	10465.8	59	0.205719	Naive	IK	Il6st	24427	IK_CKO_Naive|IK_CKO_Treg|WT_Naive|WT_Treg
32_OCR_108715_lociStitched	chr8	87417344	87562458	32	19794	260886	74312.9	60	0.203797	Naive	IK	Tnpo2	0	IK_CKO_Naive|IK_CKO_Treg|WT_Naive|WT_Treg
14_OCR_68260_lociStitched	chr2	163896084	163929534	14	6522	199125	13396.7	61	0.202874	Naive	IK	Stk4	0	IK_CKO_Naive|IK_CKO_Treg|WT_Naive|WT_Treg
23_OCR_59629_lociStitched	chr19	57130011	57211045	23	14525	203444	17778.9	62	0.202805	Naive	IK	Ablim1	0	IK_CKO_Naive|IK_CKO_Treg|WT_Naive|WT_Treg
22_OCR_72922_lociStitched	chr3	89662148	89717468	22	10326	205110	20457.3	63	0.201699	Naive	IK	Il6ra	0	IK_CKO_Naive|IK_CKO_Treg|WT_Naive|WT_Treg
19_OCR_6604_lociStitched	chr1	161953929	162016142	19	11455	194920	10905.9	64	0.201001	Naive	IK	Gm10529	0	IK_CKO_Naive|IK_CKO_Treg|WT_Naive|WT_Treg
24_OCR_112383_lociStitched	chr9	32294327	32357177	24	11878	201038	17591.7	65	0.200382	Naive	IK	Fli1	0	IK_CKO_Naive|IK_CKO_Treg|WT_Naive|WT_Treg
18_OCR_20869_lociStitched	chr11	107268833	107341310	18	11006	202747	19742.7	66	0.199899	Naive	IK	Psmd12	0	IK_CKO_Naive|IK_CKO_Treg|WT_Naive|WT_Treg
8_OCR_52806_lociStitched	chr17	84580003	84602883	8	4398	200008	17340.8	67	0.19953	Naive	IK	Zfp36l2	0	IK_CKO_Naive|IK_CKO_Treg|WT_Naive|WT_Treg
11_OCR_95329_lociStitched	chr6	99370518	99402989	11	5707	186218	7289.74	68	0.195446	Naive	IK	Foxp1	0	IK_CKO_Naive|IK_CKO_Treg|WT_Naive|WT_Treg
11_OCR_97340_lociStitched	chr6	134847410	134882856	11	8237	197406	19130.2	69	0.194734	Naive	IK	Cdkn1b	0	IK_CKO_Naive|IK_CKO_Treg|WT_Naive|WT_Treg
34_OCR_110831_lociStitched	chr8	125476810	125589897	34	17408	201996	24189.3	70	0.194221	Naive	IK	Spg7	0	IK_CKO_Naive|IK_CKO_Treg|WT_Naive|WT_Treg
38_OCR_62727_lociStitched	chr2	57938864	58052180	38	17121	188173	10708.4	71	0.193847	Naive	IK	Gm13546	0	IK_CKO_Naive|IK_CKO_Treg|WT_Naive|WT_Treg
47_OCR_57995_lociStitched	chr19	10783740	10920338	47	25133	219240	42126.8	72	0.193463	Naive	IK	Slc15a3	0	IK_CKO_Naive|IK_CKO_Treg|WT_Naive|WT_Treg
8_OCR_72748_lociStitched	chr3	87937014	87968185	8	5572	195015	18880.3	73	0.192395	Naive	IK	Mef2d	0	IK_CKO_Naive|IK_CKO_Treg|WT_Naive|WT_Treg
38_OCR_97064_lociStitched	chr6	129124688	129235230	38	19254	187358	12413.9	74	0.191094	Naive	IK	Cd69	0	IK_CKO_Naive|IK_CKO_Treg|WT_Naive|WT_Treg
18_OCR_92604_lociStitched	chr6	41477250	41517626	18	8029	183868	9092.68	75	0.19091	Naive	IK	Trbv31	0	IK_CKO_Naive|IK_CKO_Treg|WT_Naive|WT_Treg
32_OCR_105814_lociStitched	chr8	13577022	13687465	32	16779	208295	34833.7	76	0.189475	Naive	IK	Rasa3	0	IK_CKO_Naive|IK_CKO_Treg|WT_Naive|WT_Treg
12_OCR_9738_lociStitched	chr10	18885392	18930238	12	7286	180276	7565.52	77	0.188655	Naive	IK	Olig3	146127	IK_CKO_Naive|IK_CKO_Treg|WT_Naive|WT_Treg
36_OCR_105882_lociStitched	chr8	14910933	15047583	36	21798	227427	55684.9	78	0.187596	Naive	IK	BB014433	0	IK_CKO_Naive|IK_CKO_Treg|WT_Naive|WT_Treg
14_OCR_106369_lociStitched	chr8	26707350	26749599	14	8444	185836	15813.8	79	0.185719	Naive	IK	SNORA70	0	IK_CKO_Naive|IK_CKO_Treg|WT_Naive|WT_Treg
19_OCR_96752_lociStitched	chr6	125165127	125236284	19	11695	191875	21930.6	80	0.185633	Naive	IK	Tuba3a	0	IK_CKO_Naive|IK_CKO_Treg|WT_Naive|WT_Treg
36_OCR_80575_lociStitched	chr4	100840323	100938117	36	17158	182982	14121.5	81	0.18445	Naive	IK	Gm12785	0	IK_CKO_Naive|IK_CKO_Treg|WT_Naive|WT_Treg
20_OCR_36990_lociStitched	chr14	79880417	79964843	20	11889	186396	17746.3	82	0.184219	Naive	IK	Elf1	0	IK_CKO_Naive|IK_CKO_Treg|WT_Naive|WT_Treg
10_OCR_15865_lociStitched	chr10	128168024	128187707	10	4586	178407	11219.3	83	0.182622	Naive	IK	Wibg	0	IK_CKO_Naive|IK_CKO_Treg|WT_Naive|WT_Treg
16_OCR_83994_lociStitched	chr4	155365921	155409325	16	9398	194541	30821.2	84	0.178834	Naive	IK	Tnfrsf18	0	IK_CKO_Naive|IK_CKO_Treg|WT_Naive|WT_Treg
26_OCR_39422_lociStitched	chr15	27493828	27611772	26	16247	189324	25959.5	85	0.178446	Naive	IK	Fam105a	0	IK_CKO_Naive|IK_CKO_Treg|WT_Naive|WT_Treg
22_OCR_111056_lociStitched	chr8	129094921	129162294	22	9199	187472	24375.6	86	0.178153	Naive	IK	Irf2bp2	0	IK_CKO_Naive|IK_CKO_Treg|WT_Naive|WT_Treg
45_OCR_88065_lociStitched	chr5	106015645	106186827	45	22062	195935	34253.5	87	0.176607	Naive	IK	Lrrc8d	0	IK_CKO_Naive|IK_CKO_Treg|WT_Naive|WT_Treg
23_OCR_21547_lociStitched	chr11	118057949	118128359	23	12889	186537	25756	88	0.175624	Naive	IK	Usp36	0	IK_CKO_Naive|IK_CKO_Treg|WT_Naive|WT_Treg
9_OCR_19454_lociStitched	chr11	82871455	82893717	9	5708	167744	7275.22	89	0.175283	Naive	IK	Slfn2	0	IK_CKO_Naive|IK_CKO_Treg|WT_Naive|WT_Treg
21_OCR_35949_lociStitched	chr14	61304822	61364913	21	10476	181505	21164.1	90	0.175143	Naive	IK	Spata13	0	IK_CKO_Naive|IK_CKO_Treg|WT_Naive|WT_Treg
21_OCR_5196_lociStitched	chr1	135942578	136017159	21	10906	188526	28959.8	91	0.174297	Naive	IK	Chit1	0	IK_CKO_Naive|IK_CKO_Treg|WT_Naive|WT_Treg
20_OCR_94069_lociStitched	chr6	72864404	72944111	20	11449	175595	16068.9	92	0.174253	Naive	IK	Tmsb10	0	IK_CKO_Naive|IK_CKO_Treg|WT_Naive|WT_Treg
17_OCR_88609_lociStitched	chr5	114262153	114323490	17	10112	184864	26031.4	93	0.173495	Naive	IK	Coro1c	0	IK_CKO_Naive|IK_CKO_Treg|WT_Naive|WT_Treg
18_OCR_99513_lociStitched	chr7	29565173	29619438	18	10778	186802	28787.6	94	0.172602	Naive	IK	Lgals4	0	IK_CKO_Naive|IK_CKO_Treg|WT_Naive|WT_Treg
21_OCR_50108_lociStitched	chr17	34027338	34137783	21	16507	214584	56812.9	95	0.172336	Naive	IK	H2-K1	0	IK_CKO_Naive|IK_CKO_Treg|WT_Naive|WT_Treg
32_OCR_8050_lociStitched	chr1	185829214	185943184	32	19134	172870	16730.8	96	0.170553	Naive	IK	Dusp10	0	IK_CKO_Naive|IK_CKO_Treg|WT_Naive|WT_Treg
35_OCR_86531_lociStitched	chr5	66240277	66347641	35	18345	175809	20184.4	97	0.169991	Naive	IK	Chrna9	0	IK_CKO_Naive|IK_CKO_Treg|WT_Naive|WT_Treg
19_OCR_89268_lociStitched	chr5	123565966	123629136	19	11491	196181	42740.8	98	0.167605	Naive	IK	Hpd	0	IK_CKO_Naive|IK_CKO_Treg|WT_Naive|WT_Treg
7_OCR_63752_lociStitched	chr2	75496601	75543320	7	6861	168856	16220.8	99	0.166727	Naive	IK	E030042O20Rik	0	IK_CKO_Naive|IK_CKO_Treg|WT_Naive|WT_Treg
22_OCR_17258_lociStitched	chr11	32432762	32502112	22	11822	182238	30070.2	100	0.166215	Naive	IK	Stk10	0	IK_CKO_Naive|IK_CKO_Treg|WT_Naive|WT_Treg
21_OCR_28411_lociStitched	chr13	24686339	24732438	21	9365	161582	9786.82	101	0.165808	Naive	IK	Fam65b	0	IK_CKO_Naive|IK_CKO_Treg|WT_Naive|WT_Treg
36_OCR_14052_lociStitched	chr10	96027907	96127304	36	18489	166162	14680.9	102	0.165465	Naive	IK	Btg1	0	IK_CKO_Naive|IK_CKO_Treg|WT_Naive|WT_Treg
20_OCR_90303_lociStitched	chr5	141041901	141095675	20	9944	181390	29914.5	103	0.16546	Naive	IK	Lfng	0	IK_CKO_Naive|IK_CKO_Treg|WT_Naive|WT_Treg
29_OCR_83914_lociStitched	chr4	154494790	154610212	29	16974	202150	51016.5	104	0.165086	Naive	IK	Ski	0	IK_CKO_Naive|IK_CKO_Treg|WT_Naive|WT_Treg
21_OCR_57729_lociStitched	chr19	5786431	5856833	21	11060	178187	28273.4	105	0.163754	Naive	IK	Gm9783	0	IK_CKO_Naive|IK_CKO_Treg|WT_Naive|WT_Treg
17_OCR_20185_lociStitched	chr11	97839180	97893079	17	9516	176622	28070.6	106	0.162265	Naive	IK	Rpl19	0	IK_CKO_Naive|IK_CKO_Treg|WT_Naive|WT_Treg
15_OCR_20816_lociStitched	chr11	106509539	106550168	15	7660	163158	14744.3	107	0.162115	Naive	IK	Pecam1	2492	IK_CKO_Naive|IK_CKO_Treg|WT_Naive|WT_Treg
21_OCR_82074_lociStitched	chr4	129217362	129302581	21	12323	178704	30943	108	0.161402	Naive	IK	Gm12965	0	IK_CKO_Naive|IK_CKO_Treg|WT_Naive|WT_Treg
14_OCR_20833_lociStitched	chr11	106577860	106650881	14	10125	167072	20402.1	109	0.16021	Naive	IK	Ccdc45	0	IK_CKO_Naive|IK_CKO_Treg|WT_Naive|WT_Treg
19_OCR_25364_lociStitched	chr12	88200155	88265125	19	10079	169117	24584.6	110	0.157875	Naive	IK	Gm17422	0	IK_CKO_Naive|IK_CKO_Treg|WT_Naive|WT_Treg
21_OCR_74179_lociStitched	chr3	115636215	115711434	21	10421	155613	12102.7	111	0.156759	Naive	IK	Extl2	0	IK_CKO_Naive|IK_CKO_Treg|WT_Naive|WT_Treg
20_OCR_82110_lociStitched	chr4	129408606	129517817	20	12830	169900	27444.7	112	0.155606	Naive	IK	Ptp4a2	0	IK_CKO_Naive|IK_CKO_Treg|WT_Naive|WT_Treg
38_OCR_59901_lociStitched	chr2	3620933	3728103	38	18687	161784	20180.1	113	0.154676	Naive	IK	Fam107b	0	IK_CKO_Naive|IK_CKO_Treg|WT_Naive|WT_Treg
17_OCR_104169_lociStitched	chr7	134225706	134288508	17	10810	164083	23117.4	114	0.153979	Naive	IK	Spn	0	IK_CKO_Naive|IK_CKO_Treg|WT_Naive|WT_Treg
16_OCR_99734_lociStitched	chr7	31911523	31962768	16	8265	159828	20108.5	115	0.152618	Naive	IK	G630030J09Rik	0	IK_CKO_Naive|IK_CKO_Treg|WT_Naive|WT_Treg
28_OCR_44700_lociStitched	chr16	23223303	23308691	28	17364	159667	20091.8	116	0.15246	Naive	IK	St6gal1	0	IK_CKO_Naive|IK_CKO_Treg|WT_Naive|WT_Treg
16_OCR_106669_lociStitched	chr8	35202408	35243422	16	8691	153679	14162.1	117	0.152397	Naive	IK	Tmem66	0	IK_CKO_Naive|IK_CKO_Treg|WT_Naive|WT_Treg
8_OCR_12815_lociStitched	chr10	79479192	79502816	8	5728	159715	20675.7	118	0.151875	Naive	IK	Polr2e	0	IK_CKO_Naive|IK_CKO_Treg|WT_Naive|WT_Treg
23_OCR_110906_lociStitched	chr8	126780739	126855334	23	9988	167727	28823.5	119	0.151726	Naive	IK	1810008B01Rik	0	IK_CKO_Naive|IK_CKO_Treg|WT_Naive|WT_Treg
22_OCR_52125_lociStitched	chr17	73239358	73317539	22	13245	157449	18849.4	120	0.151394	Naive	IK	Lbh	0	IK_CKO_Naive|IK_CKO_Treg|WT_Naive|WT_Treg
9_OCR_84769_lociStitched	chr5	22938272	22979273	9	4534	150621	12259.3	121	0.151135	Naive	IK	Mll5	0	IK_CKO_Naive|IK_CKO_Treg|WT_Naive|WT_Treg
6_OCR_20761_lociStitched	chr11	106015425	106032433	6	3899	147917	10648.7	122	0.14994	Naive	IK	Gm10840	0	IK_CKO_Naive|IK_CKO_Treg|WT_Naive|WT_Treg
10_OCR_115787_lociStitched	chr9	108940649	108962447	10	4972	151540	14698.4	123	0.149474	Naive	IK	Trex1	0	IK_CKO_Naive|IK_CKO_Treg|WT_Naive|WT_Treg
30_OCR_11701_lociStitched	chr10	59341650	59445532	30	18044	178625	42747.4	124	0.148421	Naive	IK	Ddit4	0	IK_CKO_Naive|IK_CKO_Treg|WT_Naive|WT_Treg
10_OCR_19608_lociStitched	chr11	86620446	86653847	10	6935	142856	7010.87	125	0.148386	Naive	IK	AL596111.1	0	IK_CKO_Naive|IK_CKO_Treg|WT_Naive|WT_Treg
6_OCR_89239_lociStitched	chr5	123434536	123445395	6	3871	147044	11280.3	126	0.148297	Naive	IK	A930024E05Rik	0	IK_CKO_Naive|IK_CKO_Treg|WT_Naive|WT_Treg
21_OCR_12826_lociStitched	chr10	79560042	79642879	21	14294	206024	70411.4	127	0.148132	Naive	IK	Efna2	0	IK_CKO_Naive|IK_CKO_Treg|WT_Naive|WT_Treg
8_OCR_86401_lociStitched	chr5	64862990	64910638	8	6341	143754	8548.05	128	0.147688	Naive	IK	Tbc1d1	121805	IK_CKO_Naive|IK_CKO_Treg|WT_Naive|WT_Treg
7_OCR_11007_lociStitched	chr10	42606706	42628750	7	3773	139144	4067.12	129	0.147547	Naive	IK	Scml4	0	IK_CKO_Naive|WT_Naive
9_OCR_98857_lociStitched	chr7	16948437	16991699	9	6880	151149	16097.8	130	0.147518	Naive	IK	Zc3h4	0	IK_CKO_Naive|IK_CKO_Treg|WT_Naive|WT_Treg
14_OCR_112959_lociStitched	chr9	44788303	44831194	14	6255	144560	9633.32	131	0.147383	Naive	IK	Cd3e	0	IK_CKO_Naive|IK_CKO_Treg|WT_Naive|WT_Treg
18_OCR_50806_lociStitched	chr17	47638740	47706725	18	9081	153721	18988.2	132	0.147171	Naive	IK	Ccnd3	0	IK_CKO_Naive|IK_CKO_Treg|WT_Naive|WT_Treg
11_OCR_18641_lociStitched	chr11	68244972	68267210	11	5208	142132	7585.38	133	0.146968	Naive	IK	Pik3r5	0	IK_CKO_Naive|IK_CKO_Treg|WT_Naive|WT_Treg
8_OCR_104032_lociStitched	chr7	132613510	132635553	8	4077	142795	8830.43	134	0.146331	Naive	IK	Nsmce1	0	IK_CKO_Naive|IK_CKO_Treg|WT_Naive|WT_Treg
35_OCR_96005_lociStitched	chr6	114781857	114887230	35	18579	168987	35152.4	135	0.146189	Naive	IK	Vgll4	0	IK_CKO_Naive|IK_CKO_Treg|WT_Naive|WT_Treg
29_OCR_18088_lociStitched	chr11	54716075	54860422	29	16662	176277	43405.1	136	0.145138	Naive	IK	Anxa6	0	IK_CKO_Naive|IK_CKO_Treg|WT_Naive|WT_Treg
17_OCR_26793_lociStitched	chr12	114082037	114117046	17	7648	149793	17143.9	137	0.144895	Naive	IK	Gpr132	0	IK_CKO_Naive|IK_CKO_Treg|WT_Naive|WT_Treg
7_OCR_102891_lociStitched	chr7	109384794	109416734	7	5937	146550	16755.7	138	0.141777	Naive	IK	Stim1	0	IK_CKO_Naive|IK_CKO_Treg|WT_Naive|WT_Treg
24_OCR_33136_lociStitched	chr13	117984424	118078949	24	13429	141173	11598.2	139	0.141537	Naive	IK	Emb	0	IK_CKO_Naive|IK_CKO_Treg|WT_Naive|WT_Treg
6_OCR_21523_lociStitched	chr11	117991136	118014690	6	3041	140601	11159.9	140	0.141391	Naive	IK	Dnahc17	602	IK_CKO_Naive|IK_CKO_Treg|WT_Naive|WT_Treg
20_OCR_54444_lociStitched	chr18	33098080	33160808	20	11421	138522	9152.02	141	0.141313	Naive	IK	Camk4	0	IK_CKO_Naive|IK_CKO_Treg|WT_Naive|WT_Treg
22_OCR_54046_lociStitched	chr18	21089900	21180646	22	15233	148188	18947.8	142	0.141172	Naive	IK	Rnf138	0	IK_CKO_Naive|IK_CKO_Treg|WT_Naive|WT_Treg
11_OCR_113730_lociStitched	chr9	62188706	62222554	11	6608	151263	22278.8	143	0.140892	Naive	IK	Anp32a	0	IK_CKO_Naive|IK_CKO_Treg|WT_Naive|WT_Treg
42_OCR_108524_lociStitched	chr8	84254203	84391348	42	20672	137817	9065.28	144	0.140638	Naive	IK	Inpp4b	0	IK_CKO_Naive|IK_CKO_Treg|WT_Naive|WT_Treg
14_OCR_26614_lociStitched	chr12	111716491	111753629	14	7377	144159	16938.6	145	0.138964	Naive	IK	Ppp2r5c	0	IK_CKO_Naive|IK_CKO_Treg|WT_Naive|WT_Treg
10_OCR_32802_lociStitched	chr13	112561335	112600193	10	9275	142842	17004.3	146	0.137455	Naive	IK	Gm15327	0	IK_CKO_Naive|IK_CKO_Treg|WT_Naive|WT_Treg
10_OCR_17381_lociStitched	chr11	34572156	34609928	10	6799	135583	9816.94	147	0.137376	Naive	IK	Dock2	0	IK_CKO_Naive|IK_CKO_Treg|WT_Naive|WT_Treg
7_OCR_24986_lociStitched	chr12	81204448	81217053	7	4282	135351	12179	148	0.134543	Naive	IK	Zfp36l1	0	IK_CKO_Naive|IK_CKO_Treg|WT_Naive|WT_Treg
9_OCR_82494_lociStitched	chr4	134289992	134329613	9	6725	143531	20404.8	149	0.134493	Naive	IK	Ldlrap1	0	IK_CKO_Naive|WT_Naive
17_OCR_82434_lociStitched	chr4	133634746	133685284	17	8273	147808	25263.9	150	0.133857	Naive	IK	Sh3bgrl3	0	IK_CKO_Naive|IK_CKO_Treg|WT_Naive|WT_Treg
18_OCR_68990_lociStitched	chr2	172843288	172889112	18	10436	147402	27008.7	151	0.131508	Naive	IK	Gm14453	0	IK_CKO_Naive|IK_CKO_Treg|WT_Naive|WT_Treg
7_OCR_16001_lociStitched	chr11	3228391	3253496	7	3991	130473	10511.5	152	0.131036	Naive	IK	Limk2	0	IK_CKO_Naive|WT_Naive
12_OCR_52047_lociStitched	chr17	71794121	71845536	12	6356	131658	12673.8	153	0.129969	Naive	IK	Gm4707	0	IK_CKO_Naive|IK_CKO_Treg|WT_Naive|WT_Treg
13_OCR_49661_lociStitched	chr17	28313617	28370480	13	9067	149612	31081.3	154	0.129473	Naive	IK	Ppard	0	IK_CKO_Naive|IK_CKO_Treg|WT_Naive|WT_Treg
4_OCR_42970_lociStitched	chr15	97280184	97300733	4	3625	125649	7562.03	155	0.128988	Naive	IK	Amigo2	202465	IK_CKO_Naive|IK_CKO_Treg|WT_Naive|WT_Treg
6_OCR_66019_lociStitched	chr2	126489131	126511418	6	3705	126220	8527.01	156	0.128558	Naive	IK	Gabpb1	0	IK_CKO_Naive|IK_CKO_Treg|WT_Naive|WT_Treg
17_OCR_3631_lociStitched	chr1	92934569	92995828	17	9456	136167	18481.8	157	0.128549	Naive	IK	Lrrfip1	0	IK_CKO_Naive|IK_CKO_Treg|WT_Naive|WT_Treg
15_OCR_26387_lociStitched	chr12	108356598	108399294	15	8934	125432	7962.8	158	0.128314	Naive	IK	Gm16084	0	IK_CKO_Naive|IK_CKO_Treg|WT_Naive|WT_Treg
27_OCR_58072_lociStitched	chr19	11540908	11619201	27	13209	121542	5754.54	159	0.126477	Naive	IK	Ms4a4d	0	IK_CKO_Naive|IK_CKO_Treg|WT_Naive|WT_Treg
25_OCR_104046_lociStitched	chr7	132719299	132794799	25	12479	140755	25700.2	160	0.125676	Naive	IK	Il21r	0	IK_CKO_Naive|IK_CKO_Treg|WT_Naive|WT_Treg
26_OCR_68456_lociStitched	chr2	166418017	166501359	26	13214	152933	38679	161	0.124801	Naive	IK	AL732357.1	0	IK_CKO_Naive|IK_CKO_Treg|WT_Naive|WT_Treg
61_OCR_92036_lociStitched	chr6	30982750	31190499	61	30043	157266	43731.2	162	0.124016	Naive	IK	2210408F21Rik	0	IK_CKO_Naive|IK_CKO_Treg|WT_Naive|WT_Treg
10_OCR_24766_lociStitched	chr12	77462306	77487169	10	5651	127147	13766.6	163	0.123847	Naive	IK	Zbtb1	0	IK_CKO_Naive|IK_CKO_Treg|WT_Naive|WT_Treg
21_OCR_14944_lociStitched	chr10	116350572	116400099	21	9177	128087	15650.5	164	0.122816	Naive	IK	Rab3ip	0	IK_CKO_Naive|IK_CKO_Treg|WT_Naive|WT_Treg
13_OCR_80631_lociStitched	chr4	102230467	102261576	13	6025	117147	5459.63	165	0.121998	Naive	IK	Pde4b	0	IK_CKO_Naive|IK_CKO_Treg|WT_Naive|WT_Treg
32_OCR_38799_lociStitched	chr15	6489991	6576060	32	15418	121977	10724.2	166	0.121523	Naive	IK	Fyb	0	IK_CKO_Naive|IK_CKO_Treg|WT_Naive|WT_Treg
27_OCR_35079_lociStitched	chr14	41700179	41792594	27	14021	132320	21800.7	167	0.120722	Naive	IK	Tspan14	0	IK_CKO_Naive|IK_CKO_Treg|WT_Naive|WT_Treg
33_OCR_111126_lociStitched	chr8	129348322	129470198	33	19919	141925	31504.9	168	0.120613	Naive	IK	SNORA14	0	IK_CKO_Naive|IK_CKO_Treg|WT_Naive|WT_Treg
27_OCR_8720_lociStitched	chr1	194955986	195057973	27	16848	129656	19316.3	169	0.120526	Naive	IK	1600010F14Rik	0	IK_CKO_Naive|IK_CKO_Treg|WT_Naive|WT_Treg
22_OCR_104193_lociStitched	chr7	134307042	134441465	22	18094	154600	44964.5	170	0.119757	Naive	IK	Itgal	0	IK_CKO_Naive|IK_CKO_Treg|WT_Naive|WT_Treg
16_OCR_59451_lociStitched	chr19	53464308	53518263	16	9714	130997	21684.5	171	0.119404	Naive	IK	Smndc1	0	IK_CKO_Naive|IK_CKO_Treg|WT_Naive|WT_Treg
8_OCR_51130_lociStitched	chr17	52288204	52322552	8	6139	112184	3070.71	172	0.119186	Naive	IK	AC121600.1	221809	IK_CKO_Naive|IK_CKO_Treg|WT_Naive|WT_Treg
15_OCR_61760_lociStitched	chr2	34793136	34838268	15	8669	127475	18580.8	173	0.118947	Naive	IK	Gm13450	0	IK_CKO_Naive|IK_CKO_Treg|WT_Naive|WT_Treg
21_OCR_13686_lociStitched	chr10	92605763	92670242	21	11294	122272	13792.1	174	0.118494	Naive	IK	Mir1931	0	IK_CKO_Naive|IK_CKO_Treg|WT_Naive|WT_Treg
35_OCR_56411_lociStitched	chr18	70680300	70813041	35	20511	130591	22207.6	175	0.118389	Naive	IK	Mbd2	0	IK_CKO_Naive|IK_CKO_Treg|WT_Naive|WT_Treg
17_OCR_108602_lociStitched	chr8	86238717	86323453	17	11075	134383	26632.5	176	0.117697	Naive	IK	7SK	0	IK_CKO_Naive|IK_CKO_Treg|WT_Naive|WT_Treg
15_OCR_18692_lociStitched	chr11	68901549	68948328	15	9694	136155	28834.6	177	0.117228	Naive	IK	Aloxe3	0	IK_CKO_Naive|IK_CKO_Treg|WT_Naive|WT_Treg
13_OCR_82397_lociStitched	chr4	133262408	133313720	13	7374	123883	16589.2	178	0.117198	Naive	IK	Arid1a	0	IK_CKO_Naive|IK_CKO_Treg|WT_Naive|WT_Treg
8_OCR_51100_lociStitched	chr17	52015674	52051928	8	5580	110814	3777.67	179	0.116918	Naive	IK	Satb1	43058	IK_CKO_Naive|WT_Naive
32_OCR_29651_lociStitched	chr13	51821259	51911845	32	17660	136495	29503.9	180	0.116868	Naive	IK	AC126547.1	0	IK_CKO_Naive|IK_CKO_Treg|WT_Naive|WT_Treg
19_OCR_96675_lociStitched	chr6	124633612	124732873	19	14202	144455	37629.8	181	0.116686	Naive	IK	Lrrc23	0	IK_CKO_Naive|IK_CKO_Treg|WT_Naive|WT_Treg
15_OCR_14022_lociStitched	chr10	95787537	95837692	15	8733	111795	5401.69	182	0.116216	Naive	IK	AC131596.1	160571	IK_CKO_Naive|IK_CKO_Treg|WT_Naive|WT_Treg
23_OCR_92394_lociStitched	chr6	38248337	38310799	23	10547	122313	16215.1	183	0.115893	Naive	IK	Zc3hav1	0	IK_CKO_Naive|IK_CKO_Treg|WT_Naive|WT_Treg
18_OCR_101556_lociStitched	chr7	82701744	82758547	18	9769	113805	8014.9	184	0.115556	Naive	IK	Akap13	0	IK_CKO_Naive|IK_CKO_Treg|WT_Naive|WT_Treg
13_OCR_89853_lociStitched	chr5	134779673	134826973	13	7826	117597	13655.5	185	0.113537	Naive	IK	Mir3965	0	IK_CKO_Naive|IK_CKO_Treg|WT_Naive|WT_Treg
21_OCR_66054_lociStitched	chr2	127126485	127172470	21	10131	120536	17258.2	186	0.112812	Naive	IK	Astl	0	IK_CKO_Naive|IK_CKO_Treg|WT_Naive|WT_Treg
19_OCR_94568_lociStitched	chr6	87452373	87502770	19	10648	112526	9268.01	187	0.112791	Naive	IK	Arhgap25	0	IK_CKO_Naive|IK_CKO_Treg|WT_Naive|WT_Treg
23_OCR_21439_lociStitched	chr11	117153374	117221498	23	13115	141725	38503.7	188	0.112751	Naive	IK	2021-09-09	0	IK_CKO_Naive|IK_CKO_Treg|WT_Naive|WT_Treg
9_OCR_18506_lociStitched	chr11	63765672	63806235	9	5100	113548	10558.5	189	0.112497	Naive	IK	9630013K17Rik	0	IK_CKO_Naive|WT_Naive
15_OCR_115853_lociStitched	chr9	110773481	110825558	15	6473	123876	20976.6	190	0.112398	Naive	IK	Als2cl	0	IK_CKO_Naive|WT_Naive
23_OCR_68774_lociStitched	chr2	169973002	170079551	23	16060	124471	22066.3	191	0.111858	Naive	IK	Gm17619	0	IK_CKO_Naive|IK_CKO_Treg|WT_Naive|WT_Treg
4_OCR_38469_lociStitched	chr14	122264464	122280788	4	2437	108682	6611.22	192	0.111494	Naive	IK	Ubac2	0	IK_CKO_Naive|WT_Naive|WT_Treg
7_OCR_42962_lociStitched	chr15	97172806	97205068	7	6331	111197	9310.81	193	0.111292	Naive	IK	Amigo2	95087	IK_CKO_Naive|IK_CKO_Treg|WT_Naive|WT_Treg
18_OCR_102080_lociStitched	chr7	90733210	90824635	18	11462	116631	14975.4	194	0.11104	Naive	IK	2310044K18Rik	0	IK_CKO_Naive|IK_CKO_Treg|WT_Naive|WT_Treg
30_OCR_5450_lociStitched	chr1	140020580	140089127	30	13350	106878	5257.55	195	0.111002	Naive	IK	Ptprc	0	IK_CKO_Naive|IK_CKO_Treg|WT_Naive|WT_Treg
15_OCR_111428_lociStitched	chr9	7829568	7873430	15	7994	114190	12781.4	196	0.110771	Naive	IK	Birc3	0	IK_CKO_Naive|IK_CKO_Treg|WT_Naive|WT_Treg
5_OCR_19070_lociStitched	chr11	75770191	75797037	5	2896	109081	8024.27	197	0.110386	Naive	IK	1700016K19Rik	16376	IK_CKO_Naive|WT_Naive
21_OCR_112827_lociStitched	chr9	43817245	43861261	21	10054	115538	14490.1	198	0.110376	Naive	IK	Thy1	0	IK_CKO_Naive|IK_CKO_Treg|WT_Naive|WT_Treg
4_OCR_61582_lociStitched	chr2	32342595	32351435	4	2472	107040	6033.3	199	0.110331	Naive	IK	Gm13412	29115	IK_CKO_Naive|IK_CKO_Treg|WT_Naive|WT_Treg
17_OCR_82559_lociStitched	chr4	134938322	134996423	17	9241	120304	19510.3	200	0.110099	Naive	IK	Gm15979	0	IK_CKO_Naive|IK_CKO_Treg|WT_Naive|WT_Treg
14_OCR_12173_lociStitched	chr10	67684478	67764233	14	13567	113236	12872.5	201	0.109629	Naive	IK	Arid5b	0	IK_CKO_Naive|IK_CKO_Treg|WT_Naive|WT_Treg
17_OCR_85530_lociStitched	chr5	37414734	37479894	17	9652	117894	17664.9	202	0.109482	Naive	IK	Jakmip1	0	IK_CKO_Naive|IK_CKO_Treg|WT_Naive|WT_Treg
41_OCR_116355_lociStitched	chr9	119872130	120050361	41	25020	157414	58976.6	203	0.107524	Naive	IK	Snora62	0	IK_CKO_Naive|IK_CKO_Treg|WT_Naive|WT_Treg
10_OCR_62824_lociStitched	chr2	59293598	59328724	10	5126	101061	4341.57	204	0.105648	Naive	IK	Dapl1	0	IK_CKO_Naive|WT_Naive
33_OCR_1788_lociStitched	chr1	54871853	54992100	33	17949	113645	17002.9	205	0.105564	Naive	IK	Ankrd44	0	IK_CKO_Naive|IK_CKO_Treg|WT_Naive|WT_Treg
15_OCR_59418_lociStitched	chr19	53237135	53293880	15	8771	104689	8477.7	206	0.105093	Naive	IK	U6	2781	IK_CKO_Naive|IK_CKO_Treg|WT_Naive|WT_Treg
7_OCR_5049_lociStitched	chr1	133874515	133907862	7	4236	108514	12845.3	207	0.104501	Naive	IK	Elk4	0	IK_CKO_Naive|IK_CKO_Treg|WT_Naive|WT_Treg
20_OCR_5393_lociStitched	chr1	138496911	138604366	20	15022	114837	19449.4	208	0.104194	Naive	IK	AC125186.1	0	IK_CKO_Naive|IK_CKO_Treg|WT_Naive|WT_Treg
18_OCR_103438_lociStitched	chr7	121207092	121261631	18	10577	107049	11905.9	209	0.103927	Naive	IK	Rras2	0	IK_CKO_Naive|WT_Naive|WT_Treg
9_OCR_44669_lociStitched	chr16	23165442	23197208	9	4980	98731.9	3916.75	210	0.103568	Naive	IK	Gm6630	0	IK_CKO_Naive|IK_CKO_Treg|WT_Naive|WT_Treg
7_OCR_43257_lociStitched	chr15	100428692	100453074	7	5841	108037	14024.5	211	0.102691	Naive	IK	Dazap2	0	IK_CKO_Naive|IK_CKO_Treg|WT_Naive|WT_Treg
27_OCR_17337_lociStitched	chr11	33902110	34023441	27	13749	110533	16634.5	212	0.102566	Naive	IK	Lcp2	0	IK_CKO_Naive|IK_CKO_Treg|WT_Naive|WT_Treg
19_OCR_94291_lociStitched	chr6	83354330	83407394	19	11185	113339	19564.7	213	0.102432	Naive	IK	B230319C09Rik	0	IK_CKO_Naive|IK_CKO_Treg|WT_Naive|WT_Treg
28_OCR_71732_lociStitched	chr3	60274712	60343091	28	13931	103245	9778.2	214	0.102096	Naive	IK	Mbnl1	0	IK_CKO_Naive|IK_CKO_Treg|WT_Naive|WT_Treg
18_OCR_82183_lociStitched	chr4	130448056	130516465	18	9303	121405	28506	215	0.101476	Naive	IK	Matn1	0	IK_CKO_Naive|IK_CKO_Treg|WT_Naive|WT_Treg
14_OCR_11001_lociStitched	chr10	42547434	42589880	14	7596	103042	10153.1	216	0.101464	Naive	IK	Scml4	0	IK_CKO_Naive|WT_Naive|WT_Treg
7_OCR_104035_lociStitched	chr7	132684391	132705208	7	2996	102509	9677.82	217	0.101401	Naive	IK	Il4ra	0	IK_CKO_Naive|IK_CKO_Treg|WT_Naive|WT_Treg
37_OCR_16815_lociStitched	chr11	20982648	21092618	37	18643	105945	13383.3	218	0.101107	Naive	IK	Peli1	0	IK_CKO_Naive|IK_CKO_Treg|WT_Naive|WT_Treg
24_OCR_99716_lociStitched	chr7	31802778	31896819	24	11189	125093	32651	219	0.100976	Naive	IK	Hpn	0	IK_CKO_Naive|IK_CKO_Treg|WT_Naive|WT_Treg
13_OCR_49810_lociStitched	chr17	29596056	29651745	13	7534	115293	23021.8	220	0.100789	Naive	IK	Pim1	0	IK_CKO_Naive|IK_CKO_Treg|WT_Naive|WT_Treg
25_OCR_41752_lociStitched	chr15	78377853	78464961	25	13802	124730	32944.2	221	0.100259	Naive	IK	Cyth4	0	IK_CKO_Naive|IK_CKO_Treg|WT_Naive|WT_Treg
14_OCR_116775_lociStitched	chrX	7142515	7195853	14	8240	105311	13782.5	222	0.0999776	Naive	IK	Cacna1f	0	IK_CKO_Naive|IK_CKO_Treg|WT_Naive|WT_Treg
18_OCR_21355_lociStitched	chr11	116215845	116307859	18	15132	122645	31146.7	223	0.0999456	Naive	IK	Fam100b	0	IK_CKO_Naive|IK_CKO_Treg|WT_Naive|WT_Treg
12_OCR_10018_lociStitched	chr10	21992797	22026728	12	7112	98552.6	7128.9	224	0.0998636	Naive	IK	H60b	0	IK_CKO_Naive|IK_CKO_Treg|WT_Naive|WT_Treg
19_OCR_30680_lociStitched	chr13	73817943	73917241	19	12615	111343	19929.1	225	0.0998528	Naive	IK	Slc12a7	0	IK_CKO_Naive|WT_Naive
9_OCR_16231_lociStitched	chr11	6446203	6469845	9	4881	99922.9	8541.85	226	0.0998171	Naive	IK	Ccm2	0	IK_CKO_Naive|IK_CKO_Treg|WT_Naive|WT_Treg
7_OCR_105839_lociStitched	chr8	13955170	13993389	7	6489	102289	10942.1	227	0.0997801	Naive	IK	2610019F03Rik	0	IK_CKO_Naive|WT_Naive
28_OCR_67940_lociStitched	chr2	158492108	158571269	28	15696	118963	27753.8	228	0.0996295	Naive	IK	AL663077.1	0	IK_CKO_Naive|IK_CKO_Treg|WT_Naive|WT_Treg
5_OCR_15160_lociStitched	chr10	118304955	118330987	5	4984	98697.7	7554.49	229	0.0995573	Naive	IK	Dyrk2	0	IK_CKO_Naive|IK_CKO_Treg|WT_Naive|WT_Treg
16_OCR_78082_lociStitched	chr4	40758347	40801616	16	10041	103707	12565.3	230	0.0995558	Naive	IK	AL833775.2	0	IK_CKO_Naive|IK_CKO_Treg|WT_Naive|WT_Treg
9_OCR_40593_lociStitched	chr15	57508779	57538035	9	5460	101012	9938.26	231	0.0994816	Naive	IK	Zhx2	0	IK_CKO_Naive|IK_CKO_Treg|WT_Naive|WT_Treg
9_OCR_29836_lociStitched	chr13	55505888	55551734	9	6869	107477	16527.5	232	0.0993455	Naive	IK	Grk6	0	IK_CKO_Naive|IK_CKO_Treg|WT_Naive|WT_Treg
18_OCR_34462_lociStitched	chr14	28042291	28093967	18	8021	103202	12335.1	233	0.0992557	Naive	IK	Arhgef3	0	IK_CKO_Naive|IK_CKO_Treg|WT_Naive|WT_Treg
37_OCR_8571_lociStitched	chr1	193099298	193271668	37	22008	133139	42420.3	234	0.0990932	Naive	IK	Ppp2r5a	0	IK_CKO_Naive|IK_CKO_Treg|WT_Naive|WT_Treg
28_OCR_34484_lociStitched	chr14	28116507	28227488	28	17980	106675	16325.3	235	0.0986904	Naive	IK	AC154327.1	0	IK_CKO_Naive|IK_CKO_Treg|WT_Naive|WT_Treg
18_OCR_112892_lociStitched	chr9	44285930	44346477	18	11323	119090	28759.8	236	0.0986691	Naive	IK	Cxcr5	0	IK_CKO_Naive|IK_CKO_Treg|WT_Naive|WT_Treg
37_OCR_4215_lociStitched	chr1	108439123	108611403	37	21379	106590	16573.3	237	0.0983263	Naive	IK	Bcl2	0	IK_CKO_Naive|IK_CKO_Treg|WT_Naive|WT_Treg
15_OCR_40806_lociStitched	chr15	59928759	59973756	15	7205	93260.8	3455.77	238	0.0980955	Naive	IK	U6	12415	IK_CKO_Naive|IK_CKO_Treg|WT_Naive|WT_Treg
12_OCR_20993_lociStitched	chr11	109263276	109307310	12	8568	104550	14976	239	0.0978432	Naive	IK	Amz2	0	IK_CKO_Naive|IK_CKO_Treg|WT_Naive|WT_Treg
11_OCR_29409_lociStitched	chr13	46808838	46838161	11	5846	96522.5	7283.83	240	0.0974769	Naive	IK	Nup153	0	IK_CKO_Naive|IK_CKO_Treg|WT_Naive|WT_Treg
21_OCR_9133_lociStitched	chr10	7529635	7576073	21	9495	98806.1	9849.5	241	0.0971688	Naive	IK	SNORA40	0	IK_CKO_Naive|IK_CKO_Treg|WT_Naive|WT_Treg
18_OCR_18170_lociStitched	chr11	57447636	57502381	18	7971	104766	15919.8	242	0.0970476	Naive	IK	4933426K07Rik	0	IK_CKO_Naive|WT_Naive
9_OCR_18977_lociStitched	chr11	74643302	74680905	9	5666	116637	27871.3	243	0.0969602	Naive	IK	Sgsm2	0	IK_CKO_Naive|IK_CKO_Treg|WT_Naive|WT_Treg
14_OCR_39913_lociStitched	chr15	36688647	36729515	14	7984	102485	13944.2	244	0.0967143	Naive	IK	AC138604.1	0	IK_CKO_Naive|IK_CKO_Treg|WT_Naive|WT_Treg
33_OCR_98798_lociStitched	chr7	16497478	16642868	33	16410	137699	49287.2	245	0.0965736	Naive	IK	Gltscr1	0	IK_CKO_Naive|IK_CKO_Treg|WT_Naive|WT_Treg
30_OCR_16883_lociStitched	chr11	22680221	22783378	30	16566	108655	20332.2	246	0.0964767	Naive	IK	U6	0	IK_CKO_Naive|IK_CKO_Treg|WT_Naive|WT_Treg
10_OCR_20566_lociStitched	chr11	102128665	102181846	10	8674	119668	32291.5	247	0.0954427	Naive	IK	Ubtf	0	IK_CKO_Naive|IK_CKO_Treg|WT_Naive|WT_Treg
25_OCR_1234_lociStitched	chr1	39949904	40040292	25	14239	106079	18818.8	248	0.0953162	Naive	IK	Map4k4	0	IK_CKO_Naive|IK_CKO_Treg|WT_Naive|WT_Treg
13_OCR_63513_lociStitched	chr2	71624214	71655110	13	6990	96222.5	9185.38	249	0.0950721	Naive	IK	Itga6	0	IK_CKO_Naive|IK_CKO_Treg|WT_Naive|WT_Treg
20_OCR_61589_lociStitched	chr2	32389956	32464502	20	11476	118618	31793.9	250	0.094839	Naive	IK	St6galnac6	0	IK_CKO_Naive|IK_CKO_Treg|WT_Naive|WT_Treg
10_OCR_72713_lociStitched	chr3	87635787	87664250	10	5281	95598.7	8960.15	251	0.0946367	Naive	IK	Sh2d2a	0	IK_CKO_Naive|IK_CKO_Treg|WT_Naive|WT_Treg
15_OCR_69042_lociStitched	chr2	173227150	173295773	15	7629	107059	20497.7	252	0.0945521	Naive	IK	Gm14642	7082	IK_CKO_Naive|WT_Naive|WT_Treg
24_OCR_99247_lociStitched	chr7	25668721	25760528	24	12730	131073	44856.9	253	0.0941751	Naive	IK	Rabac1	0	IK_CKO_Naive|IK_CKO_Treg|WT_Naive|WT_Treg
7_OCR_82509_lociStitched	chr4	134469430	134487434	7	4176	96656.3	10642.2	254	0.0939547	Naive	IK	Syf2	0	IK_CKO_Naive|IK_CKO_Treg|WT_Naive|WT_Treg
10_OCR_97003_lociStitched	chr6	128785720	128806649	10	6263	94084.2	8187.42	255	0.0938265	Naive	IK	Gm17395	0	IK_CKO_Naive|IK_CKO_Treg|WT_Naive|WT_Treg
13_OCR_18715_lociStitched	chr11	69203933	69246110	13	7728	116088	30801.9	256	0.0931595	Naive	IK	Kdm6b	0	IK_CKO_Naive|IK_CKO_Treg|WT_Naive|WT_Treg
13_OCR_97524_lociStitched	chr6	136868847	136895859	13	5506	91776	6580.12	257	0.0930609	Naive	IK	Arhgdib	0	IK_CKO_Naive|IK_CKO_Treg|WT_Naive|WT_Treg
22_OCR_110481_lociStitched	chr8	122301843	122371812	22	11776	110873	26007.5	258	0.0926999	Naive	IK	Cotl1	0	IK_CKO_Naive|IK_CKO_Treg|WT_Naive|WT_Treg
5_OCR_83887_lociStitched	chr4	154299551	154318738	5	4887	90503.2	5767.61	259	0.0925581	Naive	IK	Tnfrsf14	0	IK_CKO_Naive|WT_Naive|WT_Treg
12_OCR_25171_lociStitched	chr12	85533665	85564101	12	6427	100250	15729.3	260	0.0923235	Naive	IK	C130039O16Rik	0	IK_CKO_Naive|IK_CKO_Treg|WT_Naive|WT_Treg
9_OCR_51972_lociStitched	chr17	71183535	71203258	9	5880	96137.8	11662.2	261	0.0922741	Naive	IK	RP23-85E24.1	0	IK_CKO_Naive|IK_CKO_Treg|WT_Naive|WT_Treg
3_OCR_80424_lociStitched	chr4	98098652	98111804	3	2990	87377.9	3123.6	262	0.0920324	Naive	IK	Inadl	0	IK_CKO_Naive|WT_Naive|WT_Treg
12_OCR_57796_lociStitched	chr19	6363144	6429343	12	8540	121919	37733.4	263	0.091957	Naive	IK	Nrxn2	0	IK_CKO_Naive|WT_Naive|WT_Treg
28_OCR_109327_lociStitched	chr8	96857687	96983009	28	17211	113993	30039.7	264	0.0917035	Naive	IK	9330175E14Rik	0	IK_CKO_Naive|IK_CKO_Treg|WT_Naive|WT_Treg
14_OCR_83495_lociStitched	chr4	149212820	149270699	14	7502	101178	17276.9	265	0.0916469	Naive	IK	snoZ178	0	IK_CKO_Naive|WT_Naive
5_OCR_92862_lociStitched	chr6	48713613	48722443	5	2964	88172	4362.9	266	0.0915461	Naive	IK	Gimap3	0	IK_CKO_Naive|IK_CKO_Treg|WT_Naive|WT_Treg
23_OCR_79234_lociStitched	chr4	63004441	63085650	23	12181	118638	34887.4	267	0.0914825	Naive	IK	Whrn	0	IK_CKO_Naive|IK_CKO_Treg|WT_Naive|WT_Treg
11_OCR_79023_lociStitched	chr4	59201588	59238176	11	7883	91502.9	7906.67	268	0.0913136	Naive	IK	Ugcg	0	IK_CKO_Naive|WT_Naive
14_OCR_53441_lociStitched	chr18	5591138	5632189	14	7379	92118.4	8575.55	269	0.0912553	Naive	IK	AC127028.1	0	IK_CKO_Naive|IK_CKO_Treg|WT_Naive|WT_Treg
25_OCR_50126_lociStitched	chr17	34212294	34308818	25	14085	117450	34063.3	270	0.0910851	Naive	IK	H2-DMb1	0	IK_CKO_Naive|IK_CKO_Treg|WT_Naive|WT_Treg
3_OCR_74165_lociStitched	chr3	115496216	115504949	3	2808	86287.3	3024.24	271	0.0909496	Naive	IK	Gm9889	78147	IK_CKO_Naive|IK_CKO_Treg|WT_Naive|WT_Treg
13_OCR_108660_lociStitched	chr8	86697843	86735485	13	7770	112023	28807.4	272	0.0908973	Naive	IK	Mir24-2	0	IK_CKO_Naive|IK_CKO_Treg|WT_Naive|WT_Treg
15_OCR_83474_lociStitched	chr4	149053648	149112450	15	8733	109419	26266.9	273	0.0908282	Naive	IK	Tmem201	0	IK_CKO_Naive|IK_CKO_Treg|WT_Naive|WT_Treg
18_OCR_15060_lociStitched	chr10	117330238	117390709	18	12315	94292.4	11211.3	274	0.0907509	Naive	IK	Rap1b	47246	IK_CKO_Naive|IK_CKO_Treg|WT_Naive|WT_Treg
27_OCR_57087_lociStitched	chr18	82623561	82712895	27	15557	106299	23343	275	0.0906138	Naive	IK	Rpl21-ps8	0	IK_CKO_Naive|IK_CKO_Treg|WT_Naive|WT_Treg
13_OCR_17991_lociStitched	chr11	53568398	53617806	13	8699	103174	20277	276	0.0905495	Naive	IK	Gm11006	0	IK_CKO_Naive|IK_CKO_Treg|WT_Naive|WT_Treg
8_OCR_89166_lociStitched	chr5	122659626	122685779	8	5704	92924.2	10301.7	277	0.09025	Naive	IK	Hvcn1	0	IK_CKO_Naive|IK_CKO_Treg|WT_Naive|WT_Treg
4_OCR_87527_lociStitched	chr5	96590123	96606606	4	4605	89163.1	6675.61	278	0.0901025	Naive	IK	Cnot6l	0	IK_CKO_Naive|IK_CKO_Treg|WT_Naive|WT_Treg
10_OCR_44740_lociStitched	chr16	23982212	23998419	10	5117	90522.6	8131.05	279	0.0899977	Naive	IK	Bcl6	0	IK_CKO_Naive|IK_CKO_Treg|WT_Naive|WT_Treg
12_OCR_49737_lociStitched	chr17	29124735	29186381	12	5864	96217.1	14079.9	280	0.0897198	Naive	IK	Srsf3	0	IK_CKO_Naive|IK_CKO_Treg|WT_Naive|WT_Treg
10_OCR_106334_lociStitched	chr8	26366197	26421566	10	6147	92482.8	10525.6	281	0.0895232	Naive	IK	Tacc1	54275	IK_CKO_Naive|IK_CKO_Treg|WT_Naive|WT_Treg
4_OCR_63590_lociStitched	chr2	72799853	72819152	4	3975	92098.7	10257.4	282	0.0893966	Naive	IK	1700011J10Rik	0	IK_CKO_Naive|IK_CKO_Treg|WT_Naive|WT_Treg
13_OCR_90136_lociStitched	chr5	138182098	138229204	13	9053	107821	26011.9	283	0.0893613	Naive	IK	Zcwpw1	0	IK_CKO_Naive|IK_CKO_Treg|WT_Naive|WT_Treg
17_OCR_45177_lociStitched	chr16	32059932	32131012	17	12112	97301.4	15630.5	284	0.0892105	Naive	IK	Gm15729	0	IK_CKO_Naive|IK_CKO_Treg|WT_Naive|WT_Treg
10_OCR_109638_lociStitched	chr8	108120182	108162743	10	7743	100431	19744	286	0.0881359	Naive	IK	Ctcf	0	IK_CKO_Naive|IK_CKO_Treg|WT_Naive|WT_Treg
18_OCR_88505_lociStitched	chr5	112639177	112731080	18	11367	121082	41099	287	0.087367	Naive	IK	Tpst2	0	IK_CKO_Naive|IK_CKO_Treg|WT_Naive|WT_Treg
24_OCR_9920_lociStitched	chr10	20898063	20975751	24	12586	87282.5	7605.66	288	0.0870323	Naive	IK	AC153556.1	0	IK_CKO_Naive|IK_CKO_Treg|WT_Naive|WT_Treg
17_OCR_83581_lociStitched	chr4	149913938	149971292	17	9375	90952	11694.5	289	0.0865743	Naive	IK	Rere	0	IK_CKO_Naive|IK_CKO_Treg|WT_Naive|WT_Treg
9_OCR_82596_lociStitched	chr4	135429394	135488074	9	5695	96663.6	17586.4	290	0.0863773	Naive	IK	Fuca1	0	IK_CKO_Naive|IK_CKO_Treg|WT_Naive|WT_Treg
34_OCR_42367_lociStitched	chr15	85800173	85971364	34	19682	139897	60841.3	291	0.0863542	Naive	IK	Gm15722	0	IK_CKO_Naive|IK_CKO_Treg|WT_Naive|WT_Treg
6_OCR_89337_lociStitched	chr5	124524804	124546528	6	4668	93159	14203.2	292	0.0862448	Naive	IK	Abcb9	0	IK_CKO_Naive|IK_CKO_Treg|WT_Naive|WT_Treg
8_OCR_70508_lociStitched	chr3	30975001	31008409	8	4902	90422.1	11499	293	0.086209	Naive	IK	Skil	0	IK_CKO_Naive|IK_CKO_Treg|WT_Naive|WT_Treg
12_OCR_22323_lociStitched	chr12	15796997	15845596	12	6814	88989.6	10094	294	0.086179	Naive	IK	Gm5432	0	IK_CKO_Naive|IK_CKO_Treg|WT_Naive|WT_Treg
19_OCR_15056_lociStitched	chr10	117261242	117311358	19	9202	90133.6	11331.2	295	0.0860772	Naive	IK	Rap1b	0	IK_CKO_Naive|IK_CKO_Treg|WT_Naive|WT_Treg
4_OCR_74840_lociStitched	chr3	130893611	130918469	4	3999	84350.7	5908.75	296	0.0856834	Naive	IK	Hadh	56472	IK_CKO_Naive|WT_Naive
34_OCR_46090_lociStitched	chr16	49836964	49982978	34	21047	95113.5	16879.2	297	0.0854567	Naive	IK	Cd47	0	IK_CKO_Naive|IK_CKO_Treg|WT_Naive|WT_Treg
25_OCR_2081_lociStitched	chr1	60802687	60890911	25	11124	85127.3	7093.21	298	0.085238	Naive	IK	Gm11581	0	IK_CKO_Naive|IK_CKO_Treg|WT_Naive|WT_Treg
7_OCR_78530_lociStitched	chr4	48042547	48066090	7	3704	93432.7	15448.9	299	0.0851831	Naive	IK	Nr4a3	0	IK_CKO_Naive|IK_CKO_Treg|WT_Naive|WT_Treg
4_OCR_36431_lociStitched	chr14	70167123	70181003	4	3472	81933.6	4202.86	300	0.0849066	Naive	IK	Tnfrsf10b	0	IK_CKO_Naive|WT_Naive|WT_Treg
25_OCR_18240_lociStitched	chr11	57981477	58053359	25	13155	93798.8	16108.8	301	0.0848622	Naive	IK	Irgm2	0	IK_CKO_Naive|IK_CKO_Treg|WT_Naive|WT_Treg
24_OCR_63630_lociStitched	chr2	73257400	73334590	24	12646	94519.2	17213.4	302	0.0844424	Naive	IK	Gm13708	0	IK_CKO_Naive|IK_CKO_Treg|WT_Naive|WT_Treg
9_OCR_17513_lociStitched	chr11	44332060	44360427	9	7571	85401.7	8129.98	303	0.0844052	Naive	IK	Rnf145	0	IK_CKO_Naive|IK_CKO_Treg|WT_Naive|WT_Treg
5_OCR_49243_lociStitched	chr17	21600279	21612125	5	3588	80215.2	3212.64	304	0.0841112	Naive	IK	Zfp51	12962	IK_CKO_Naive|IK_CKO_Treg|WT_Naive|WT_Treg
8_OCR_59517_lociStitched	chr19	53964065	53981085	8	4829	85666.8	8681.9	305	0.0840919	Naive	IK	Pdcd4	0	IK_CKO_Naive|IK_CKO_Treg|WT_Naive|WT_Treg
6_OCR_110133_lociStitched	chr8	117393052	117414362	6	3496	81269.9	4515.59	306	0.0838401	Naive	IK	Wwox	156984	IK_CKO_Naive|WT_Naive
19_OCR_90215_lociStitched	chr5	139800506	139874676	19	11163	118034	41498.1	307	0.0836016	Naive	IK	Gpr146	0	IK_CKO_Naive|IK_CKO_Treg|WT_Naive|WT_Treg
12_OCR_117201_lociStitched	chrX	45477686	45507379	12	5646	80919.4	4554.91	308	0.0834142	Naive	IK	Sash3	0	IK_CKO_Naive|IK_CKO_Treg|WT_Naive|WT_Treg
1_OCR_94485_lociStitched	chr6	86475569	86477377	1	1809	83885.8	7586.91	309	0.0833425	Naive	IK	1600020E01Rik	0	IK_CKO_Naive|IK_CKO_Treg|WT_Naive|WT_Treg
16_OCR_77874_lociStitched	chr4	33329159	33382438	16	9328	89269	12994.7	310	0.0833156	Naive	IK	Pnrc1	0	IK_CKO_Naive|IK_CKO_Treg|WT_Naive|WT_Treg
4_OCR_67795_lociStitched	chr2	156005107	156034358	4	4054	87331.8	11062.7	311	0.08331	Naive	IK	Phf20	0	IK_CKO_Naive|IK_CKO_Treg|WT_Naive|WT_Treg
3_OCR_11760_lociStitched	chr10	59809425	59815283	3	2294	81964.6	5774.23	312	0.083224	Naive	IK	4632428N05Rik	0	IK_CKO_Naive|IK_CKO_Treg|WT_Naive|WT_Treg
13_OCR_4859_lociStitched	chr1	130482406	130520181	13	7041	85601.9	9413.53	313	0.0832219	Naive	IK	Cxcr4	0	IK_CKO_Naive|IK_CKO_Treg|WT_Naive|WT_Treg
25_OCR_47845_lociStitched	chr16	92724786	92826806	25	13515	95480.5	19332.8	314	0.0831775	Naive	IK	Runx1	0	IK_CKO_Naive|IK_CKO_Treg|WT_Naive|WT_Treg
16_OCR_99142_lociStitched	chr7	20495916	20542775	16	9196	91098.6	15069.9	315	0.0830475	Naive	IK	Rpl7a-ps8	0	IK_CKO_Naive|IK_CKO_Treg|WT_Naive|WT_Treg
27_OCR_20923_lociStitched	chr11	108060963	108155547	27	15035	90989.8	14991.6	316	0.0830142	Naive	IK	Gm11655	17798	IK_CKO_Naive|IK_CKO_Treg|WT_Naive|WT_Treg
7_OCR_13244_lociStitched	chr10	84017378	84048121	7	5261	83633.3	7808.72	317	0.0828244	Naive	IK	Tcp11l2	0	IK_CKO_Naive|WT_Naive
3_OCR_80979_lociStitched	chr4	108131132	108144553	3	2425	82527.1	6762.84	318	0.0827586	Naive	IK	U6	0	IK_CKO_Naive|IK_CKO_Treg|WT_Naive|WT_Treg
14_OCR_51992_lociStitched	chr17	71307297	71367280	14	8501	95043.1	20112.3	320	0.0818481	Naive	IK	Myl12a	0	IK_CKO_Naive|IK_CKO_Treg|WT_Naive|WT_Treg
10_OCR_73290_lociStitched	chr3	96351360	96384444	10	5686	83791.8	8886.36	321	0.0818205	Naive	IK	Polr3gl	0	IK_CKO_Naive|IK_CKO_Treg|WT_Naive|WT_Treg
5_OCR_69115_lociStitched	chr2	174424089	174440660	5	3808	79559	4865.25	322	0.0815893	Naive	IK	Vmn1r-ps1	7357	IK_CKO_Naive|IK_CKO_Treg|WT_Naive|WT_Treg
11_OCR_32682_lociStitched	chr13	110597634	110636008	11	6193	78367.4	3752.98	323	0.0815026	Naive	IK	Pde4d	50204	IK_CKO_Naive|IK_CKO_Treg|WT_Naive|WT_Treg
5_OCR_59025_lociStitched	chr19	41903744	41923623	5	4471	84630.9	10027	324	0.0814911	Naive	IK	Frat2	0	IK_CKO_Naive|WT_Naive
5_OCR_23147_lociStitched	chr12	33986905	34002967	5	3770	79153.5	4593.73	325	0.0814429	Naive	IK	Atxn7l1	0	IK_CKO_Naive|IK_CKO_Treg|WT_Naive|WT_Treg
21_OCR_108012_lociStitched	chr8	73177190	73301492	21	17080	149138	74693.1	326	0.081317	Naive	IK	Pik3r2	0	IK_CKO_Naive|IK_CKO_Treg|WT_Naive|WT_Treg
2_OCR_112913_lociStitched	chr9	44411427	44413899	2	2399	80383	5955.3	327	0.0812987	Naive	IK	Ddx6	0	IK_CKO_Naive|IK_CKO_Treg|WT_Naive|WT_Treg
5_OCR_39449_lociStitched	chr15	27713262	27733897	5	4566	79962.7	6114.15	328	0.080666	Naive	IK	Fam105a	101999	IK_CKO_Naive|WT_Naive
30_OCR_38420_lociStitched	chr14	121659085	121779250	30	16866	107680	34126.9	329	0.0803432	Naive	IK	Stk24	0	IK_CKO_Naive|IK_CKO_Treg|WT_Naive|WT_Treg
7_OCR_82322_lociStitched	chr4	132714614	132741872	7	4726	79844.1	6471.05	330	0.0801467	Naive	IK	Wasf2	0	IK_CKO_Naive|IK_CKO_Treg|WT_Naive|WT_Treg
17_OCR_9731_lociStitched	chr10	18781629	18859586	17	10341	79835.8	6602.96	331	0.0799934	Naive	IK	Tnfaip3	46165	IK_CKO_Naive|IK_CKO_Treg|WT_Naive|WT_Treg
9_OCR_88794_lociStitched	chr5	116160191	116183147	9	5007	80593.9	7389.54	332	0.0799624	Naive	IK	Ccdc64	0	IK_CKO_Naive|IK_CKO_Treg|WT_Naive|WT_Treg
10_OCR_77740_lociStitched	chr4	32213452	32267258	10	6310	80224.7	7279.95	333	0.0796788	Naive	IK	Gm11928	0	IK_CKO_Naive|IK_CKO_Treg|WT_Naive|WT_Treg
10_OCR_113940_lociStitched	chr9	66434360	66471792	10	6283	82125.8	9328.05	334	0.0795182	Naive	IK	Usp3	0	IK_CKO_Naive|IK_CKO_Treg|WT_Naive|WT_Treg
9_OCR_96377_lociStitched	chr6	119422097	119472790	9	7456	86821.9	14341	335	0.0791721	Naive	IK	Fbxl14	0	IK_CKO_Naive|WT_Naive
10_OCR_80968_lociStitched	chr4	107973184	108023077	10	6902	83126.7	10771.9	336	0.0790344	Naive	IK	2010305A19Rik	0	IK_CKO_Naive|WT_Naive|WT_Treg
6_OCR_27414_lociStitched	chr13	5859873	5871969	6	2278	78114.8	6018.97	337	0.0787515	Naive	IK	Klf6	0	IK_CKO_Naive|IK_CKO_Treg|WT_Naive|WT_Treg
17_OCR_26028_lociStitched	chr12	102213907	102267963	17	9361	96684.6	24638.7	338	0.0786969	Naive	IK	Mir1190	0	IK_CKO_Naive|IK_CKO_Treg|WT_Naive|WT_Treg
13_OCR_1945_lociStitched	chr1	58767904	58803983	13	7947	80928.8	8886.26	339	0.0786933	Naive	IK	Cflar	0	IK_CKO_Naive|IK_CKO_Treg|WT_Naive|WT_Treg
19_OCR_6303_lociStitched	chr1	156873012	156969942	19	13962	96057.6	24125.9	340	0.0785723	Naive	IK	Ier5	0	IK_CKO_Naive|IK_CKO_Treg|WT_Naive|WT_Treg
10_OCR_15760_lociStitched	chr10	127095242	127115300	10	5784	87260.3	15378.5	341	0.0785178	Naive	IK	Tmem194	0	IK_CKO_Naive|IK_CKO_Treg|WT_Naive|WT_Treg
15_OCR_14095_lociStitched	chr10	96148479	96195325	15	7199	77666	5813.59	342	0.0784856	Naive	IK	Btg1	68843	IK_CKO_Naive|IK_CKO_Treg|WT_Naive|WT_Treg
18_OCR_3494_lociStitched	chr1	90518737	90581642	18	7420	79360.9	7573.76	343	0.0784144	Naive	IK	Arl4c	16808	IK_CKO_Naive|IK_CKO_Treg|WT_Naive|WT_Treg
16_OCR_73135_lociStitched	chr3	94904814	94992141	16	10488	97098.9	25359.8	344	0.0783619	Naive	IK	Sema6c	0	IK_CKO_Naive|IK_CKO_Treg|WT_Naive|WT_Treg
3_OCR_20637_lociStitched	chr11	103123601	103129442	3	2106	77410.8	5842.17	345	0.0781756	Naive	IK	1700028N14Rik	0	IK_CKO_Naive|IK_CKO_Treg|WT_Naive|WT_Treg
15_OCR_1730_lociStitched	chr1	53805492	53882121	15	9881	80491.1	9019.23	346	0.0780699	Naive	IK	Stk17b	0	IK_CKO_Naive|IK_CKO_Treg|WT_Naive|WT_Treg
12_OCR_62052_lociStitched	chr2	43578092	43628964	12	8549	76257.1	4827.75	347	0.0780235	Naive	IK	Arhgap15	0	IK_CKO_Naive|IK_CKO_Treg|WT_Naive|WT_Treg
8_OCR_42898_lociStitched	chr15	96096370	96128766	8	5870	83928.3	12540.5	348	0.0779781	Naive	IK	Arid2	0	IK_CKO_Naive|IK_CKO_Treg|WT_Naive|WT_Treg
41_OCR_47055_lociStitched	chr16	76275444	76374542	41	19164	86314.4	15082.7	349	0.0778075	Naive	IK	Nrip1	0	IK_CKO_Naive|IK_CKO_Treg|WT_Naive|WT_Treg
25_OCR_60922_lociStitched	chr2	22599604	22678222	25	12567	80331.9	9111.83	350	0.0777949	Naive	IK	Apbb1ip	0	IK_CKO_Naive|IK_CKO_Treg|WT_Naive|WT_Treg
34_OCR_71314_lociStitched	chr3	52046430	52156843	34	18674	91355.7	20338.1	351	0.0775738	Naive	IK	Gm20402	0	IK_CKO_Naive|IK_CKO_Treg|WT_Naive|WT_Treg
5_OCR_109682_lociStitched	chr8	108571132	108584043	5	3347	78746.8	7821.48	352	0.0774729	Naive	IK	Nfatc3	0	IK_CKO_Naive|IK_CKO_Treg|WT_Naive|WT_Treg
30_OCR_99066_lociStitched	chr7	19812779	19930942	30	18532	126446	55879.3	353	0.0770815	Naive	IK	Ercc1	0	IK_CKO_Naive|IK_CKO_Treg|WT_Naive|WT_Treg
10_OCR_87941_lociStitched	chr5	104170588	104221120	10	7255	82306.5	11779	354	0.0770384	Naive	IK	Aff1	0	IK_CKO_Naive|IK_CKO_Treg|WT_Naive|WT_Treg
19_OCR_96986_lociStitched	chr6	128703780	128759023	19	8294	78754.4	8269.88	355	0.0769915	Naive	IK	Klrb1c	0	IK_CKO_Naive|IK_CKO_Treg|WT_Naive|WT_Treg
6_OCR_18837_lociStitched	chr11	70452485	70483674	6	6272	89843	19427.6	356	0.0769159	Naive	IK	Spag7	0	IK_CKO_Naive|IK_CKO_Treg|WT_Naive|WT_Treg
7_OCR_19042_lociStitched	chr11	75343918	75355265	7	4429	78543.9	8503.44	357	0.0765064	Naive	IK	Slc43a2	0	IK_CKO_Naive|IK_CKO_Treg|WT_Naive|WT_Treg
23_OCR_113792_lociStitched	chr9	63522286	63607217	23	12748	96889.3	27424.2	358	0.0758779	Naive	IK	Smad3	0	IK_CKO_Naive|IK_CKO_Treg|WT_Naive|WT_Treg
5_OCR_98227_lociStitched	chr6	146020341	146031357	5	2631	72984.3	3611.04	359	0.0757776	Naive	IK	Itpr2	64372	IK_CKO_Naive|IK_CKO_Treg|WT_Naive|WT_Treg
8_OCR_3504_lociStitched	chr1	90596041	90617810	8	4248	78372.8	9112.5	360	0.0756541	Naive	IK	Arl4c	0	IK_CKO_Naive|IK_CKO_Treg|WT_Naive|WT_Treg
6_OCR_50758_lociStitched	chr17	46993311	47028161	6	6216	85187.3	16142.5	361	0.0754188	Naive	IK	Tbcc	0	IK_CKO_Naive|IK_CKO_Treg|WT_Naive|WT_Treg
14_OCR_94834_lociStitched	chr6	91054734	91090235	14	6703	77303.4	8356.94	362	0.0753114	Naive	IK	Nup210	0	IK_CKO_Naive|IK_CKO_Treg|WT_Naive|WT_Treg
10_OCR_9774_lociStitched	chr10	19289912	19318295	10	5607	75626.5	6775.02	363	0.0752076	Naive	IK	Ifngr1	0	IK_CKO_Naive|IK_CKO_Treg|WT_Naive|WT_Treg
9_OCR_46402_lociStitched	chr16	55947794	55975394	9	5786	77655.4	8815.44	364	0.075195	Naive	IK	Rpl24	0	IK_CKO_Naive|IK_CKO_Treg|WT_Naive|WT_Treg
18_OCR_68078_lociStitched	chr2	160526038	160589936	18	8666	83578.6	14773.2	365	0.0751573	Naive	IK	Plcg1	0	IK_CKO_Naive|IK_CKO_Treg|WT_Naive|WT_Treg
10_OCR_32693_lociStitched	chr13	110681936	110725097	10	5104	77016.5	8386.18	366	0.074966	Naive	IK	Pde4d	0	IK_CKO_Naive|IK_CKO_Treg|WT_Naive|WT_Treg
5_OCR_32876_lociStitched	chr13	113253776	113265028	5	3321	73439.6	4892.37	367	0.0748753	Naive	IK	Il6st	187	IK_CKO_Naive|IK_CKO_Treg|WT_Naive|WT_Treg
6_OCR_66388_lociStitched	chr2	132311142	132342418	6	3192	75146.8	7180.97	368	0.0742403	Naive	IK	1700026D11Rik	0	IK_CKO_Naive|IK_CKO_Treg|WT_Naive|WT_Treg
18_OCR_95941_lociStitched	chr6	113552949	113647540	18	14103	97665.2	29871.8	369	0.0740518	Naive	IK	Tatdn2	0	IK_CKO_Naive|IK_CKO_Treg|WT_Naive|WT_Treg
9_OCR_3322_lociStitched	chr1	88397657	88429429	9	6433	88377	20731.2	370	0.0738906	Naive	IK	Ptma	0	IK_CKO_Naive|IK_CKO_Treg|WT_Naive|WT_Treg
14_OCR_4998_lociStitched	chr1	133066447	133104348	14	5676	79319.2	11681.1	371	0.0738823	Naive	IK	Rassf5	0	IK_CKO_Naive|IK_CKO_Treg|WT_Naive|WT_Treg
5_OCR_30951_lociStitched	chr13	81021066	81036962	5	2394	76207	8803.2	372	0.0736263	Naive	IK	Arrdc3	0	IK_CKO_Naive|IK_CKO_Treg|WT_Naive|WT_Treg
10_OCR_71376_lociStitched	chr3	52411754	52452263	10	5017	73301	6019.64	373	0.0734926	Naive	IK	Gm10293	0	IK_CKO_Naive|WT_Naive
28_OCR_72843_lociStitched	chr3	88936140	89055772	28	15654	121941	54671.8	374	0.0734791	Naive	IK	Krtcap2	0	IK_CKO_Naive|IK_CKO_Treg|WT_Naive|WT_Treg
8_OCR_57599_lociStitched	chr19	4282629	4310201	8	4900	83311.6	16074.5	375	0.0734442	Naive	IK	Adrbk1	0	IK_CKO_Naive|IK_CKO_Treg|WT_Naive|WT_Treg
24_OCR_52776_lociStitched	chr17	84372645	84464237	24	10767	92141.6	25114.5	376	0.0732148	Naive	IK	5S_rRNA	25716	IK_CKO_Naive|WT_Naive
18_OCR_6724_lociStitched	chr1	163664165	163740020	18	11760	76143.2	9170.87	377	0.0731551	Naive	IK	Fasl	0	IK_CKO_Naive|IK_CKO_Treg|WT_Naive|WT_Treg
15_OCR_113510_lociStitched	chr9	57468252	57515280	15	7442	88201	21256.7	378	0.0731245	Naive	IK	Csk	0	IK_CKO_Naive|IK_CKO_Treg|WT_Naive|WT_Treg
19_OCR_49140_lociStitched	chr17	17718107	17792664	19	13189	77867.3	10967.3	379	0.073076	Naive	IK	Lnpep	0	IK_CKO_Naive|IK_CKO_Treg|WT_Naive|WT_Treg
23_OCR_17708_lociStitched	chr11	48864686	48922760	23	8512	72633.2	5743.52	380	0.0730647	Naive	IK	Gm12188	0	IK_CKO_Naive|IK_CKO_Treg|WT_Naive|WT_Treg
54_OCR_10745_lociStitched	chr10	39078300	39242212	54	29132	99215.9	32552.9	381	0.0728171	Naive	IK	Fyn	0	IK_CKO_Naive|IK_CKO_Treg|WT_Naive|WT_Treg
5_OCR_58141_lociStitched	chr19	12860501	12881090	5	3975	73826	7358.51	382	0.0726035	Naive	IK	Lpxn	0	IK_CKO_Naive|IK_CKO_Treg|WT_Naive|WT_Treg
7_OCR_3473_lociStitched	chr1	90471959	90498735	7	4692	72753.1	6426.24	383	0.0724499	Naive	IK	Glrp1	65497	IK_CKO_Naive|IK_CKO_Treg|WT_Naive|WT_Treg
17_OCR_20075_lociStitched	chr11	96824926	96921849	17	12069	107701	41473.4	384	0.0723414	Naive	IK	Osbpl7	0	IK_CKO_Naive|IK_CKO_Treg|WT_Naive|WT_Treg
9_OCR_105271_lociStitched	chr7	150810536	150835814	9	4270	70791	4684.01	385	0.0722098	Naive	IK	Tnfrsf22	0	IK_CKO_Naive|IK_CKO_Treg|WT_Naive|WT_Treg
17_OCR_24321_lociStitched	chr12	70452770	70524489	17	11199	84420.4	18324.2	386	0.072198	Naive	IK	Arf6	0	IK_CKO_Naive|IK_CKO_Treg|WT_Naive|WT_Treg
7_OCR_19704_lociStitched	chr11	87860560	87887332	7	4826	76875.8	10815.9	387	0.0721584	Naive	IK	Vezf1	0	IK_CKO_Naive|IK_CKO_Treg|WT_Naive|WT_Treg
2_OCR_7675_lociStitched	chr1	180335503	180343349	2	2011	70917.6	5182.28	388	0.0718038	Naive	IK	Efcab2	0	IK_CKO_Naive|IK_CKO_Treg|WT_Naive|WT_Treg
11_OCR_42131_lociStitched	chr15	81957805	82018637	11	6568	87896.2	22264.5	389	0.0716906	Naive	IK	Srebf2	0	IK_CKO_Naive|IK_CKO_Treg|WT_Naive|WT_Treg
2_OCR_17881_lociStitched	chr11	51813380	51818068	2	1779	71621.4	6247.23	390	0.0714093	Naive	IK	Cdkl3	0	IK_CKO_Naive|IK_CKO_Treg|WT_Naive|WT_Treg
18_OCR_97720_lociStitched	chr6	140546803	140610870	18	10736	81525.3	16189.7	391	0.0713671	Naive	IK	Aebp2	0	IK_CKO_Naive|IK_CKO_Treg|WT_Naive|WT_Treg
18_OCR_40952_lociStitched	chr15	63844999	63917815	18	10962	82784.5	17461.3	392	0.0713537	Naive	IK	U6	0	IK_CKO_Naive|IK_CKO_Treg|WT_Naive|WT_Treg
24_OCR_47975_lociStitched	chr16	94790539	94882259	24	12269	81392.3	16078.5	393	0.0713434	Naive	IK	Gm15971	0	IK_CKO_Naive|IK_CKO_Treg|WT_Naive|WT_Treg
7_OCR_73672_lociStitched	chr3	103576773	103614039	7	6697	75139.4	9964.93	394	0.0711912	Naive	IK	Ap4b1	0	IK_CKO_Naive|IK_CKO_Treg|WT_Naive|WT_Treg
9_OCR_96625_lociStitched	chr6	122751091	122785037	9	7267	77631.1	12580.4	395	0.071056	Naive	IK	Foxj2	0	IK_CKO_Naive|IK_CKO_Treg|WT_Naive|WT_Treg
9_OCR_17130_lociStitched	chr11	30060608	30098813	9	5497	69628.6	4680.11	396	0.0709443	Naive	IK	Gm17438	0	IK_CKO_Naive|IK_CKO_Treg|WT_Naive|WT_Treg
2_OCR_49527_lociStitched	chr17	26639710	26646273	2	2476	73029.8	8099.4	397	0.0709246	Naive	IK	Dusp1	0	IK_CKO_Naive|IK_CKO_Treg|WT_Naive|WT_Treg
9_OCR_76987_lociStitched	chr4	8701806	8740021	9	5495	71721.9	6916.91	398	0.0707876	Naive	IK	Chd7	23220	IK_CKO_Naive|WT_Naive|WT_Treg
24_OCR_3319_lociStitched	chr1	88236016	88344746	24	13491	92931.5	28161.1	399	0.0707499	Naive	IK	1700019O17Rik	0	IK_CKO_Naive|IK_CKO_Treg|WT_Naive|WT_Treg
10_OCR_72017_lociStitched	chr3	68760115	68785464	10	5235	68830.1	4167.38	400	0.0706322	Naive	IK	Ift80	0	IK_CKO_Naive|IK_CKO_Treg|WT_Naive|WT_Treg
4_OCR_20719_lociStitched	chr11	104509933	104529366	4	2792	69704.2	5244.97	401	0.0704099	Naive	IK	Itgb3	11229	IK_CKO_Naive|WT_Naive|WT_Treg
8_OCR_53848_lociStitched	chr18	14812207	14843933	8	6134	74610	10203.1	402	0.0703528	Naive	IK	Ss18	0	IK_CKO_Naive|IK_CKO_Treg|WT_Naive|WT_Treg
10_OCR_63445_lociStitched	chr2	70646557	70690730	10	6973	71047.9	6683.37	403	0.0703064	Naive	IK	Tlk1	0	IK_CKO_Naive|IK_CKO_Treg|WT_Naive|WT_Treg
9_OCR_61616_lociStitched	chr2	32567695	32583439	9	5182	76120.7	11956	404	0.0700882	Naive	IK	Sh2d3c	0	IK_CKO_Naive|IK_CKO_Treg|WT_Naive|WT_Treg
25_OCR_56942_lociStitched	chr18	80867201	80935599	25	12417	94368.7	30231.9	405	0.0700577	Naive	IK	Nfatc1	0	IK_CKO_Naive|IK_CKO_Treg|WT_Naive|WT_Treg
7_OCR_42113_lociStitched	chr15	81676104	81703244	7	4818	76982.6	12975.6	406	0.0699159	Naive	IK	Aco2	0	IK_CKO_Naive|IK_CKO_Treg|WT_Naive|WT_Treg
12_OCR_50157_lociStitched	chr17	34323799	34356391	12	7986	84429.6	20568.8	407	0.0697562	Naive	IK	Gm15821	0	IK_CKO_Naive|IK_CKO_Treg|WT_Naive|WT_Treg
8_OCR_82403_lociStitched	chr4	133360307	133399690	8	4784	76320.3	12523.8	408	0.069686	Naive	IK	Gm12974	0	IK_CKO_Naive|IK_CKO_Treg|WT_Naive|WT_Treg
6_OCR_1928_lociStitched	chr1	58464254	58481282	6	5004	68699.5	4973.88	409	0.0696085	Naive	IK	Clk1	0	IK_CKO_Naive|IK_CKO_Treg|WT_Naive|WT_Treg
10_OCR_54516_lociStitched	chr18	34999838	35021427	10	5090	76697.1	13065.7	410	0.0695057	Naive	IK	Egr1	0	IK_CKO_Naive|IK_CKO_Treg|WT_Naive|WT_Treg
14_OCR_93911_lociStitched	chr6	70740931	70795134	14	10105	74632.1	11084.5	411	0.0694141	Naive	IK	Eif2ak3	0	IK_CKO_Naive|IK_CKO_Treg|WT_Naive|WT_Treg
6_OCR_82316_lociStitched	chr4	132674100	132695960	6	3519	71322.6	7913.32	412	0.0692631	Naive	IK	Wasf2	0	IK_CKO_Naive|IK_CKO_Treg|WT_Naive|WT_Treg
36_OCR_79979_lociStitched	chr4	87570841	87692980	36	20010	76910.9	13520.8	413	0.0692421	Naive	IK	Gm12646	0	IK_CKO_Naive|IK_CKO_Treg|WT_Naive|WT_Treg
25_OCR_44008_lociStitched	chr16	10723101	10815426	25	12913	97956.8	34640.3	414	0.0691617	Naive	IK	Gm11172	0	IK_CKO_Naive|IK_CKO_Treg|WT_Naive|WT_Treg
9_OCR_83968_lociStitched	chr4	155027644	155080087	9	6375	85733.8	22424.6	415	0.0691537	Naive	IK	Ssu72	0	IK_CKO_Naive|IK_CKO_Treg|WT_Naive|WT_Treg
22_OCR_118373_lociStitched	chrX	156111496	156179987	22	9573	67121.2	4212.2	416	0.0687165	Naive	IK	Sh3kbp1	0	IK_CKO_Naive|IK_CKO_Treg|WT_Naive|WT_Treg
5_OCR_43592_lociStitched	chr16	4862814	4887557	5	5387	77185.8	14343.5	417	0.0686437	Naive	IK	Mgrn1	0	IK_CKO_Naive|IK_CKO_Treg|WT_Naive|WT_Treg
1_OCR_57536_lociStitched	chr19	3767374	3769275	1	1902	69459.3	6635.44	418	0.0686236	Naive	IK	Suv420h1	0	IK_CKO_Naive|IK_CKO_Treg|WT_Naive|WT_Treg
27_OCR_6959_lociStitched	chr1	167564149	167666818	27	15825	91775.8	28952.7	419	0.0686228	Naive	IK	Rcsd1	0	IK_CKO_Naive|IK_CKO_Treg|WT_Naive|WT_Treg
2_OCR_74168_lociStitched	chr3	115518091	115522664	2	1523	64726.7	1908.77	420	0.0686171	Naive	IK	A930005H10Rik	68383	IK_CKO_Naive|IK_CKO_Treg|WT_Naive|WT_Treg
14_OCR_9715_lociStitched	chr10	18703276	18735721	14	7487	71427.7	8698.5	421	0.0685201	Naive	IK	Tnfaip3	0	IK_CKO_Naive|IK_CKO_Treg|WT_Naive|WT_Treg
19_OCR_68406_lociStitched	chr2	165798383	165872021	19	10617	75957.6	13232.7	422	0.0685154	Naive	IK	Ncoa3	0	IK_CKO_Naive|IK_CKO_Treg|WT_Naive|WT_Treg
20_OCR_61541_lociStitched	chr2	31976638	32047797	20	9600	88052.1	25389.5	423	0.0684474	Naive	IK	Prrc2b	0	IK_CKO_Naive|IK_CKO_Treg|WT_Naive|WT_Treg
10_OCR_86491_lociStitched	chr5	65874952	65929346	10	6103	76260.4	13609.4	424	0.0684348	Naive	IK	Ube2k	0	IK_CKO_Naive|IK_CKO_Treg|WT_Naive|WT_Treg
14_OCR_101951_lociStitched	chr7	88027733	88093208	14	8779	77568.2	15039.6	425	0.0683011	Naive	IK	Sec11a	0	IK_CKO_Naive|WT_Naive|WT_Treg
11_OCR_83469_lociStitched	chr4	149019220	149040078	11	5433	73720.5	11252.9	426	0.0682344	Naive	IK	Pik3cd	0	IK_CKO_Naive|IK_CKO_Treg|WT_Naive|WT_Treg
13_OCR_68586_lociStitched	chr2	167735228	167788307	13	8826	80940.2	18487.4	427	0.0682182	Naive	IK	Ptpn1	0	IK_CKO_Naive|IK_CKO_Treg|WT_Naive|WT_Treg
6_OCR_88770_lociStitched	chr5	115921203	115942321	6	4605	70234.2	7813.66	428	0.0681831	Naive	IK	U4	0	IK_CKO_Naive|IK_CKO_Treg|WT_Naive|WT_Treg
13_OCR_112392_lociStitched	chr9	32370042	32428454	13	5607	70281.3	7868.1	429	0.068175	Naive	IK	Ets1	15351	IK_CKO_Naive|IK_CKO_Treg|WT_Naive|WT_Treg
10_OCR_19349_lociStitched	chr11	79880912	79903486	10	5022	69141.9	6788	430	0.0681102	Naive	IK	Atad5	0	IK_CKO_Naive|IK_CKO_Treg|WT_Naive|WT_Treg
14_OCR_98854_lociStitched	chr7	16848295	16912158	14	9725	96944	34626.5	431	0.0680705	Naive	IK	Bbc3	0	IK_CKO_Naive|IK_CKO_Treg|WT_Naive
38_OCR_95051_lociStitched	chr6	94547255	94669165	38	17668	89165	27088.4	432	0.0678073	Naive	IK	Lrig1	0	IK_CKO_Naive|IK_CKO_Treg|WT_Naive|WT_Treg
7_OCR_19959_lociStitched	chr11	95212209	95246606	7	5651	74297.5	12255.7	433	0.0677694	Naive	IK	Slc35b1	0	IK_CKO_Naive|IK_CKO_Treg|WT_Naive|WT_Treg
19_OCR_71409_lociStitched	chr3	52632981	52711402	19	9063	69849.6	7944.05	434	0.0676205	Naive	IK	U6	106303	IK_CKO_Naive|IK_CKO_Treg|WT_Naive|WT_Treg
8_OCR_2314_lociStitched	chr1	64574256	64596285	8	3689	69964.1	8073.63	435	0.067604	Naive	IK	Creb1	0	IK_CKO_Naive|IK_CKO_Treg|WT_Naive|WT_Treg
5_OCR_21242_lociStitched	chr11	115264738	115289652	5	5223	72522.2	10703.1	436	0.0675261	Naive	IK	Kctd2	0	IK_CKO_Naive|IK_CKO_Treg|WT_Naive|WT_Treg
13_OCR_12984_lociStitched	chr10	80625117	80666413	13	7203	87910.9	26313.8	437	0.0672836	Naive	IK	Itgb1bp3	0	IK_CKO_Naive|IK_CKO_Treg|WT_Naive|WT_Treg
10_OCR_6368_lociStitched	chr1	157845465	157890499	10	4590	72509.2	10997.3	438	0.0671905	Naive	IK	Tor1aip2	0	IK_CKO_Naive|IK_CKO_Treg|WT_Naive|WT_Treg
6_OCR_73153_lociStitched	chr3	95014461	95043297	6	3929	72672.5	11534.4	439	0.0667822	Naive	IK	Cdc42se1	0	IK_CKO_Naive|IK_CKO_Treg|WT_Naive|WT_Treg
13_OCR_108800_lociStitched	chr8	89210500	89281701	13	7686	70439.1	9355.81	440	0.0667224	Naive	IK	Gm10638	0	IK_CKO_Naive|WT_Naive
19_OCR_88273_lociStitched	chr5	108350451	108417294	19	10644	69864.3	8783.17	441	0.06672	Naive	IK	Fam69a	0	IK_CKO_Naive|WT_Naive|WT_Treg
6_OCR_66191_lociStitched	chr2	129000195	129025065	6	4107	68703.4	7622.65	442	0.0667195	Naive	IK	Slc20a1	0	IK_CKO_Naive|IK_CKO_Treg|WT_Naive|WT_Treg
7_OCR_115128_lociStitched	chr9	96248322	96270775	7	4499	67399.4	6358.69	443	0.0666758	Naive	IK	Gm17562	0	IK_CKO_Naive|IK_CKO_Treg|WT_Naive|WT_Treg
15_OCR_2286_lociStitched	chr1	64124946	64186456	15	8031	69838.5	8832.84	444	0.0666375	Naive	IK	Klf7	0	IK_CKO_Naive|IK_CKO_Treg|WT_Naive|WT_Treg
19_OCR_114402_lociStitched	chr9	77757833	77814544	19	11926	77421.9	16417.8	445	0.0666357	Naive	IK	Elovl5	0	IK_CKO_Naive|IK_CKO_Treg|WT_Naive|WT_Treg
15_OCR_98639_lociStitched	chr7	4947172	5014468	15	10024	96394.8	35693.8	446	0.0663047	Naive	IK	U2af2	0	IK_CKO_Naive|IK_CKO_Treg|WT_Naive|WT_Treg
16_OCR_16249_lociStitched	chr11	6554977	6616883	16	8143	79524.4	18838	447	0.0662888	Naive	IK	Gm11980	0	IK_CKO_Naive|IK_CKO_Treg|WT_Naive|WT_Treg
6_OCR_73284_lociStitched	chr3	96291588	96307296	6	4703	66168.4	5518.22	448	0.0662492	Naive	IK	U1	0	IK_CKO_Naive|IK_CKO_Treg|WT_Naive|WT_Treg
9_OCR_90919_lociStitched	chr5	151394742	151428481	9	6809	70194	9561.63	449	0.0662298	Naive	IK	N4bp2l1	0	IK_CKO_Naive|IK_CKO_Treg|WT_Naive|WT_Treg
21_OCR_57240_lociStitched	chr18	84190247	84285199	21	11013	83519.8	22892.9	450	0.0662237	Naive	IK	Zadh2	0	IK_CKO_Naive|IK_CKO_Treg|WT_Naive|WT_Treg
39_OCR_1423_lociStitched	chr1	43501026	43620353	39	19914	79841.7	19235.5	451	0.0662012	Naive	IK	Nck2	0	IK_CKO_Naive|IK_CKO_Treg|WT_Naive|WT_Treg
23_OCR_7880_lociStitched	chr1	182778204	182876082	23	12590	90546.9	29970.2	452	0.066169	Naive	IK	Tmem63a	0	IK_CKO_Naive|IK_CKO_Treg|WT_Naive|WT_Treg
15_OCR_6817_lociStitched	chr1	165983734	166029081	15	8083	64406.3	3872.63	453	0.066122	Naive	IK	Sell	0	IK_CKO_Naive|IK_CKO_Treg|WT_Naive|WT_Treg
9_OCR_85207_lociStitched	chr5	31994280	32035731	9	7461	68348.6	7871.54	454	0.0660601	Naive	IK	Bre	0	IK_CKO_Naive|IK_CKO_Treg|WT_Naive|WT_Treg
6_OCR_108686_lociStitched	chr8	87180410	87189259	6	3399	67448	7128.75	455	0.0658877	Naive	IK	Gm2529	0	IK_CKO_Naive|IK_CKO_Treg|WT_Naive|WT_Treg
20_OCR_9369_lociStitched	chr10	12508895	12595199	20	13214	74661.6	14343.7	456	0.0658862	Naive	IK	U6	0	IK_CKO_Naive|IK_CKO_Treg|WT_Naive|WT_Treg
19_OCR_17855_lociStitched	chr11	51614311	51697885	19	12136	90544.1	30228.7	457	0.0658835	Naive	IK	Phf15	0	IK_CKO_Naive|IK_CKO_Treg|WT_Naive|WT_Treg
16_OCR_12633_lociStitched	chr10	76959755	77029968	16	8572	82767.1	22531.4	458	0.0657965	Naive	IK	Itgb2	0	IK_CKO_Naive|IK_CKO_Treg|WT_Naive|WT_Treg
11_OCR_57879_lociStitched	chr19	8757413	8816601	11	7306	72842.7	12624.8	459	0.065777	Naive	IK	Stx5a	0	IK_CKO_Naive|IK_CKO_Treg|WT_Naive|WT_Treg
7_OCR_75036_lociStitched	chr3	135100709	135119786	7	3870	68473.1	8430.13	460	0.0655859	Naive	IK	Ube2d3	0	IK_CKO_Naive|IK_CKO_Treg|WT_Naive|WT_Treg
4_OCR_18747_lociStitched	chr11	69566257	69580352	4	3714	68262.1	8373.84	461	0.0654169	Naive	IK	Zbtb4	0	IK_CKO_Naive|IK_CKO_Treg|WT_Naive|WT_Treg
33_OCR_13011_lociStitched	chr10	80680101	80820971	33	20499	161282	101469	462	0.0653352	Naive	IK	Mfsd12	0	IK_CKO_Naive|IK_CKO_Treg|WT_Naive
6_OCR_82917_lociStitched	chr4	140500721	140520812	6	3692	68492.2	8689.36	463	0.0653237	Naive	IK	Sdhb	0	IK_CKO_Naive|IK_CKO_Treg|WT_Naive|WT_Treg
5_OCR_21504_lociStitched	chr11	117813339	117831525	5	4125	73502.4	13761.3	464	0.0652561	Naive	IK	Socs3	0	IK_CKO_Naive|IK_CKO_Treg|WT_Naive|WT_Treg
4_OCR_90629_lociStitched	chr5	147591458	147606876	4	3036	65745.4	6301.34	465	0.0649318	Naive	IK	Usp12	0	IK_CKO_Naive|WT_Naive
3_OCR_57673_lociStitched	chr19	5405959	5407992	3	1764	61550.3	2143.6	466	0.0648909	Naive	IK	4930481A15Rik	0	IK_CKO_Naive|IK_CKO_Treg|WT_Naive|WT_Treg
8_OCR_72042_lociStitched	chr3	68959957	68989407	8	4655	63594.3	4246.69	467	0.0648264	Naive	IK	Kpna4	28921	IK_CKO_Naive|IK_CKO_Treg|WT_Naive|WT_Treg
5_OCR_99301_lociStitched	chr7	26052163	26067710	5	3881	77027.6	17812.2	468	0.064682	Naive	IK	Cic	0	IK_CKO_Naive|IK_CKO_Treg|WT_Naive|WT_Treg
22_OCR_41920_lociStitched	chr15	79713067	79787271	22	12734	87909.5	28724.4	469	0.0646489	Naive	IK	Cbx7	0	IK_CKO_Naive|IK_CKO_Treg|WT_Naive|WT_Treg
8_OCR_113676_lociStitched	chr9	61511818	61530556	8	4554	65197	6022.39	470	0.0646374	Naive	IK	Rplp1	231788	IK_CKO_Naive|IK_CKO_Treg|WT_Naive|WT_Treg
14_OCR_91659_lociStitched	chr6	22275247	22335749	14	9386	68034.5	8942.2	471	0.0645475	Naive	IK	Fam3c	0	IK_CKO_Naive|IK_CKO_Treg|WT_Naive|WT_Treg
8_OCR_5355_lociStitched	chr1	138002052	138037237	8	4504	73628.1	14552.5	472	0.0645293	Naive	IK	Kif21b	0	IK_CKO_Naive|IK_CKO_Treg|WT_Naive|WT_Treg
9_OCR_23805_lociStitched	chr12	52945544	52973165	9	5650	64384.6	5416.48	473	0.0644118	Naive	IK	Hectd1	15020	IK_CKO_Naive|IK_CKO_Treg|WT_Naive|WT_Treg
10_OCR_62888_lociStitched	chr2	60038080	60068495	10	5731	65967.1	7092.78	474	0.0643094	Naive	IK	2021-03-07	0	IK_CKO_Naive|WT_Naive|WT_Treg
15_OCR_52875_lociStitched	chr17	85237142	85293358	15	9169	67740.3	8882.13	475	0.0642918	Naive	IK	Lrpprc	47012	IK_CKO_Naive|IK_CKO_Treg|WT_Naive|WT_Treg
4_OCR_15716_lociStitched	chr10	126725415	126729302	4	3213	65450.5	6733.06	476	0.064138	Naive	IK	Ddit3	0	IK_CKO_Naive|IK_CKO_Treg|WT_Naive|WT_Treg
12_OCR_38889_lociStitched	chr15	8360897	8401890	12	6717	67158.8	8501.95	477	0.0640719	Naive	IK	Nipbl	0	IK_CKO_Naive|IK_CKO_Treg|WT_Naive|WT_Treg
19_OCR_38953_lociStitched	chr15	9485555	9553103	19	10206	62002.3	3458.46	478	0.0639484	Naive	IK	Il7r	25923	IK_CKO_Naive|WT_Naive
3_OCR_25185_lociStitched	chr12	85583855	85590494	3	1828	60190.5	1785.23	479	0.0637971	Naive	IK	Gm5436	9428	IK_CKO_Naive|WT_Naive|WT_Treg
9_OCR_49915_lociStitched	chr17	31342350	31361951	9	5743	66600.3	8199.1	480	0.0637926	Naive	IK	Ubash3a	0	IK_CKO_Naive|IK_CKO_Treg|WT_Naive|WT_Treg
5_OCR_73267_lociStitched	chr3	96066146	96082582	5	4956	64853.2	6488.93	481	0.0637522	Naive	IK	Hist2h2bb	0	IK_CKO_Naive|IK_CKO_Treg|WT_Naive|WT_Treg
13_OCR_111958_lociStitched	chr9	21109727	21137693	13	7384	68013.3	9659.46	482	0.0637409	Naive	IK	Ap1m2	0	IK_CKO_Naive|IK_CKO_Treg|WT_Naive|WT_Treg
17_OCR_61444_lociStitched	chr2	30963579	31036521	17	11066	78879.5	20606.1	483	0.063653	Naive	IK	Gpr107	0	IK_CKO_Naive|IK_CKO_Treg|WT_Naive|WT_Treg
7_OCR_1813_lociStitched	chr1	55082977	55110240	7	4080	66137.3	8001.69	484	0.0635025	Naive	IK	Coq10b	0	IK_CKO_Naive|IK_CKO_Treg|WT_Naive|WT_Treg
13_OCR_116910_lociStitched	chrX	11693193	11737746	13	8742	71365	13361.4	485	0.0633583	Naive	IK	2900008C10Rik	0	IK_CKO_Naive|IK_CKO_Treg|WT_Naive|WT_Treg
29_OCR_32142_lociStitched	chr13	102463891	102538869	29	15667	73081.1	15123.1	486	0.0633085	Naive	IK	Pik3r1	0	IK_CKO_Naive|IK_CKO_Treg|WT_Naive|WT_Treg
29_OCR_82627_lociStitched	chr4	135608637	135763038	29	20445	107772	50025.9	487	0.0630769	Naive	IK	Asap3	0	IK_CKO_Naive|IK_CKO_Treg|WT_Naive|WT_Treg
5_OCR_113009_lociStitched	chr9	45744586	45763959	5	4505	71040.8	13309.3	488	0.0630611	Naive	IK	Sidt2	0	IK_CKO_Naive|IK_CKO_Treg|WT_Naive|WT_Treg
14_OCR_15427_lociStitched	chr10	122149403	122200216	14	9208	63770.3	6148.37	489	0.0629414	Naive	IK	Ppm1h	0	IK_CKO_Naive|WT_Naive|WT_Treg
23_OCR_8899_lociStitched	chr10	3335335	3393543	23	10125	61246.5	3684.57	490	0.0628758	Naive	IK	Ipcef1	0	IK_CKO_Naive|IK_CKO_Treg|WT_Naive|WT_Treg
21_OCR_65559_lociStitched	chr2	117125398	117201495	21	13502	66600.1	9238.18	491	0.0626574	Naive	IK	Rasgrp1	0	IK_CKO_Naive|IK_CKO_Treg|WT_Naive|WT_Treg
23_OCR_14194_lociStitched	chr10	98376435	98442183	23	11089	71238	13938.6	492	0.0625891	Naive	IK	Atp2b1	0	IK_CKO_Naive|IK_CKO_Treg|WT_Naive|WT_Treg
6_OCR_68327_lociStitched	chr2	164725286	164750482	6	4142	71576.8	14384.4	493	0.0624722	Naive	IK	Gm11458	0	IK_CKO_Naive|IK_CKO_Treg|WT_Naive|WT_Treg
5_OCR_102291_lociStitched	chr7	97277783	97299154	5	3671	62471.7	5351.3	494	0.0623936	Naive	IK	Picalm	0	IK_CKO_Naive|IK_CKO_Treg|WT_Naive|WT_Treg
9_OCR_52825_lociStitched	chr17	84660355	84692964	9	3909	62061.4	4943.52	495	0.0623909	Naive	IK	U6	0	IK_CKO_Naive|WT_Naive
12_OCR_42925_lociStitched	chr15	96456036	96497489	12	6819	69454.5	12348.8	496	0.0623775	Naive	IK	Slc38a1	0	IK_CKO_Naive|IK_CKO_Treg|WT_Naive|WT_Treg
2_OCR_90684_lociStitched	chr5	148229689	148243413	2	3204	64703.2	7706.03	497	0.0622589	Naive	IK	Pan3	0	IK_CKO_Naive|IK_CKO_Treg|WT_Naive|WT_Treg
17_OCR_95601_lociStitched	chr6	106670858	106755376	17	9446	66042.4	9077.23	498	0.062224	Naive	IK	Crbn	0	IK_CKO_Naive|IK_CKO_Treg|WT_Naive|WT_Treg
4_OCR_99695_lociStitched	chr7	31720359	31742772	4	3123	66996.9	10303.3	499	0.0619275	Naive	IK	Gm4673	0	IK_CKO_Naive|WT_Naive
8_OCR_81868_lociStitched	chr4	125858422	125889643	8	4042	63409.9	6868.62	500	0.0617609	Naive	IK	U6	0	IK_CKO_Naive|IK_CKO_Treg|WT_Naive|WT_Treg
2_OCR_83959_lociStitched	chr4	154974541	154976468	2	1755	61562.4	5086.7	501	0.0616894	Naive	IK	Slc35e2	0	IK_CKO_Naive|IK_CKO_Treg|WT_Naive|WT_Treg
15_OCR_50350_lociStitched	chr17	35862223	35914537	15	7301	64613	8176.68	502	0.0616464	Naive	IK	4833427F10Rik	0	IK_CKO_Naive|WT_Naive
23_OCR_3068_lociStitched	chr1	80695465	80763211	23	12399	63173.1	6754.28	503	0.0616273	Naive	IK	Dock10	0	IK_CKO_Naive|IK_CKO_Treg|WT_Naive|WT_Treg
39_OCR_39363_lociStitched	chr15	25721768	25889460	39	22770	86009.2	29614.4	504	0.061601	Naive	IK	Fam134b	0	IK_CKO_Naive|WT_Naive|WT_Treg
13_OCR_65811_lociStitched	chr2	121943453	121990411	13	9463	65032.1	8799.93	505	0.0614234	Naive	IK	Trim69	0	IK_CKO_Naive|IK_CKO_Treg|WT_Naive|WT_Treg
10_OCR_117152_lociStitched	chrX	39497028	39555981	10	4678	61888.9	5724.34	506	0.0613495	Naive	IK	Stag2	0	IK_CKO_Naive|IK_CKO_Treg|WT_Naive|WT_Treg
8_OCR_66412_lociStitched	chr2	132510256	132527663	8	3972	60177.7	4021.02	507	0.0613409	Naive	IK	1110034G24Rik	0	IK_CKO_Naive|WT_Naive
8_OCR_42039_lociStitched	chr15	80752300	80779414	8	3467	62722.8	6596.84	508	0.0613074	Naive	IK	Adsl	0	IK_CKO_Naive|WT_Naive
4_OCR_110939_lociStitched	chr8	127223357	127227831	4	2165	59093.9	3002.05	509	0.0612701	Naive	IK	Ttc13	16926	IK_CKO_Naive|IK_CKO_Treg|WT_Naive|WT_Treg
16_OCR_66353_lociStitched	chr2	131808310	131889745	16	10314	71508.1	15440.1	510	0.061244	Naive	IK	Slc23a2	0	IK_CKO_Naive|WT_Naive|WT_Treg
4_OCR_71222_lociStitched	chr3	51073723	51093357	4	3219	63946	7883.05	511	0.0612385	Naive	IK	4930577N17Rik	0	IK_CKO_Naive|IK_CKO_Treg|WT_Naive|WT_Treg
13_OCR_91218_lociStitched	chr6	8434725	8482121	13	8290	63761.8	7730.29	512	0.0612042	Naive	IK	Glcci1	0	IK_CKO_Naive|IK_CKO_Treg|WT_Naive|WT_Treg
10_OCR_73683_lociStitched	chr3	103654577	103677106	10	6016	60296.6	4330.07	513	0.0611332	Naive	IK	Gm15472	0	IK_CKO_Naive|IK_CKO_Treg|WT_Naive|WT_Treg
4_OCR_57555_lociStitched	chr19	4051888	4067140	4	4207	60428.4	4514.59	514	0.0610756	Naive	IK	BC021614	0	IK_CKO_Naive|IK_CKO_Treg|WT_Naive|WT_Treg
5_OCR_29955_lociStitched	chr13	58204848	58230882	5	4810	66188.8	10468.3	515	0.0608645	Naive	IK	Hnrnpa0	0	IK_CKO_Naive|IK_CKO_Treg|WT_Naive|WT_Treg
4_OCR_50367_lociStitched	chr17	36033661	36056216	4	3756	67502.6	11803	516	0.0608416	Naive	IK	Mir1894	0	IK_CKO_Naive|IK_CKO_Treg|WT_Naive|WT_Treg
23_OCR_28141_lociStitched	chr13	20181968	20277658	23	14149	69480.5	13846.3	517	0.0607701	Naive	IK	Elmo1	0	IK_CKO_Naive|IK_CKO_Treg|WT_Naive|WT_Treg
19_OCR_41486_lociStitched	chr15	74726742	74766017	19	7823	67183.8	11550.8	518	0.0607689	Naive	IK	2010109I03Rik	14607	IK_CKO_Naive|IK_CKO_Treg|WT_Naive|WT_Treg
23_OCR_61306_lociStitched	chr2	29474457	29539434	23	13253	73027.7	17459.3	519	0.0606982	Naive	IK	Rapgef1	0	IK_CKO_Naive|IK_CKO_Treg|WT_Naive|WT_Treg
2_OCR_68563_lociStitched	chr2	167600383	167604146	2	2334	61541.2	6172.45	520	0.0604803	Naive	IK	Gm14321	0	IK_CKO_Naive|IK_CKO_Treg|WT_Naive|WT_Treg
13_OCR_33112_lociStitched	chr13	117779120	117823836	13	8145	63237.4	8138.31	521	0.0601856	Naive	IK	Parp8	0	IK_CKO_Naive|IK_CKO_Treg|WT_Naive|WT_Treg
15_OCR_96703_lociStitched	chr6	124835126	124882142	15	9050	75437.2	20419	522	0.0600972	Naive	IK	Mlf2	0	IK_CKO_Naive|IK_CKO_Treg|WT_Naive|WT_Treg
6_OCR_49707_lociStitched	chr17	28729924	28762804	6	3744	64717.7	9834.41	523	0.05995	Naive	IK	Srpk1	0	IK_CKO_Naive|IK_CKO_Treg|WT_Naive|WT_Treg
11_OCR_21257_lociStitched	chr11	115306362	115353537	11	6220	71602.2	16770.7	524	0.0598934	Naive	IK	Nt5c	0	IK_CKO_Naive|WT_Naive|WT_Treg
5_OCR_108137_lociStitched	chr8	74684485	74714435	5	4206	65036.4	10284.8	525	0.0598061	Naive	IK	Hsh2d	0	IK_CKO_Naive|IK_CKO_Treg|WT_Naive|WT_Treg
21_OCR_90822_lociStitched	chr5	149758431	149865070	21	12739	81984.1	27384.9	526	0.0596396	Naive	IK	Hmgb1	0	IK_CKO_Naive|IK_CKO_Treg|WT_Naive
6_OCR_33811_lociStitched	chr14	17189320	17213263	6	4459	61133.7	6589.11	527	0.0595799	Naive	IK	Top2b	0	IK_CKO_Naive|IK_CKO_Treg|WT_Naive
13_OCR_88736_lociStitched	chr5	115600553	115655181	13	8815	79030.3	24511.6	528	0.0595517	Naive	IK	Gm13828	0	IK_CKO_Naive|IK_CKO_Treg|WT_Naive|WT_Treg
11_OCR_73645_lociStitched	chr3	103177980	103211093	11	8145	61361.7	6844.46	529	0.0595501	Naive	IK	SNORA17	0	IK_CKO_Naive|WT_Naive|WT_Treg
1_OCR_10781_lociStitched	chr10	39450869	39452973	1	2105	60981.1	6473.38	530	0.0595397	Naive	IK	Rev3l	0	IK_CKO_Naive|IK_CKO_Treg|WT_Naive|WT_Treg
27_OCR_90440_lociStitched	chr5	143632570	143737121	27	13593	101582	47152.5	531	0.059454	Naive	IK	Fscn1	0	IK_CKO_Naive|IK_CKO_Treg|WT_Naive|WT_Treg
5_OCR_12809_lociStitched	chr10	79446746	79460236	5	3301	66377.5	11956.2	532	0.0594454	Naive	IK	Abca7	0	IK_CKO_Naive|IK_CKO_Treg|WT_Naive|WT_Treg
5_OCR_90538_lociStitched	chr5	144968185	144992582	5	3647	65130.2	10715.2	533	0.0594385	Naive	IK	Tecpr1	0	IK_CKO_Naive|IK_CKO_Treg|WT_Naive|WT_Treg
2_OCR_7670_lociStitched	chr1	180265953	180268273	2	2263	61066.1	6653.06	534	0.0594363	Naive	IK	Hnrnpu	0	IK_CKO_Naive|IK_CKO_Treg|WT_Naive|WT_Treg
24_OCR_12904_lociStitched	chr10	79957380	80092201	24	13715	131976	77589.5	535	0.0594076	Naive	IK	Csnk1g2	0	IK_CKO_Naive|IK_CKO_Treg|WT_Naive|WT_Treg
21_OCR_73495_lociStitched	chr3	100797546	100881342	21	12861	71712.6	17429.6	536	0.0592943	Naive	IK	Cd101	0	IK_CKO_Naive|IK_CKO_Treg|WT_Naive|WT_Treg
6_OCR_104217_lociStitched	chr7	134613902	134642232	6	3933	68156.3	13952.5	537	0.0592077	Naive	IK	Fbrs	0	IK_CKO_Naive|IK_CKO_Treg|WT_Naive|WT_Treg
2_OCR_29801_lociStitched	chr13	54788435	54796070	2	2537	63275.1	9075.72	538	0.0592029	Naive	IK	Rnf44	0	IK_CKO_Naive|IK_CKO_Treg|WT_Naive|WT_Treg
17_OCR_5481_lociStitched	chr1	140144591	140201514	17	8604	59376.4	5191.38	539	0.0591872	Naive	IK	Atp6v1g3	0	IK_CKO_Naive|IK_CKO_Treg|WT_Naive|WT_Treg
10_OCR_95159_lociStitched	chr6	97155128	97185591	10	6322	61209.3	7189.27	540	0.059007	Naive	IK	Arl6ip5	0	IK_CKO_Naive|IK_CKO_Treg|WT_Naive|WT_Treg
7_OCR_1681_lociStitched	chr1	52687297	52712433	7	3865	59295.8	5394.19	541	0.0588777	Naive	IK	Tmem194b	0	IK_CKO_Naive|WT_Naive
5_OCR_42933_lociStitched	chr15	96528808	96551110	5	3905	64314.5	10424	542	0.0588656	Naive	IK	Slc38a2	0	IK_CKO_Naive|IK_CKO_Treg|WT_Naive|WT_Treg
48_OCR_83159_lociStitched	chr4	144783986	144957469	48	28084	87053.8	33239.3	543	0.0587824	Naive	IK	Tnfrsf8	0	IK_CKO_Naive|IK_CKO_Treg|WT_Naive|WT_Treg
4_OCR_102874_lociStitched	chr7	109097572	109119941	4	2673	59734.2	6048.58	544	0.0586417	Naive	IK	Numa1	0	IK_CKO_Naive|IK_CKO_Treg|WT_Naive|WT_Treg
8_OCR_116146_lociStitched	chr9	116228429	116250328	8	4280	56849.8	3214.77	545	0.0585865	Naive	IK	Tgfbr2	144045	IK_CKO_Naive|WT_Naive
14_OCR_77169_lociStitched	chr4	11040959	11102992	14	8145	63968.4	10396.7	546	0.0585173	Naive	IK	Trp53inp1	0	IK_CKO_Naive|IK_CKO_Treg|WT_Naive|WT_Treg
12_OCR_51200_lociStitched	chr17	53693468	53741160	12	8082	63282.5	9772.09	547	0.0584503	Naive	IK	Gm6919	0	IK_CKO_Naive|IK_CKO_Treg|WT_Naive|WT_Treg
7_OCR_82705_lociStitched	chr4	136895302	136924399	7	4739	61156.1	7669.97	548	0.0584238	Naive	IK	Cdc42	0	IK_CKO_Naive|IK_CKO_Treg|WT_Naive|WT_Treg
7_OCR_18739_lociStitched	chr11	69468889	69496570	7	4881	68922.9	15448.8	549	0.0584107	Naive	IK	2010012P19Rik	0	IK_CKO_Naive|IK_CKO_Treg|WT_Naive|WT_Treg
7_OCR_42053_lociStitched	chr15	80857834	80880391	7	4563	59640.7	6261.82	550	0.0583067	Naive	IK	U4	0	IK_CKO_Naive|IK_CKO_Treg|WT_Naive|WT_Treg
10_OCR_21216_lociStitched	chr11	115014919	115063966	10	7430	78180.9	24808	551	0.0583002	Naive	IK	Tmem104	0	IK_CKO_Naive|IK_CKO_Treg|WT_Naive|WT_Treg
19_OCR_65573_lociStitched	chr2	117215097	117284844	19	12380	59982.4	6618.99	552	0.0582898	Naive	IK	Gm13982	0	IK_CKO_Naive|IK_CKO_Treg|WT_Naive|WT_Treg
2_OCR_94606_lociStitched	chr6	87788228	87801617	2	2338	61110.1	7765.62	553	0.0582691	Naive	IK	Cnbp	0	IK_CKO_Naive|IK_CKO_Treg|WT_Naive|WT_Treg
16_OCR_26505_lociStitched	chr12	109839112	109895892	16	8471	60686.5	7370.04	554	0.0582384	Naive	IK	Evl	0	IK_CKO_Naive|WT_Naive|WT_Treg
11_OCR_50658_lociStitched	chr17	45685582	45734364	11	10778	80441.5	27147.2	555	0.0582143	Naive	IK	Slc29a1	0	IK_CKO_Naive|IK_CKO_Treg|WT_Naive|WT_Treg
17_OCR_104089_lociStitched	chr7	133322126	133431316	17	9266	78311.1	25091.9	556	0.0581322	Naive	IK	Sbk1	0	IK_CKO_Naive|IK_CKO_Treg|WT_Naive|WT_Treg
5_OCR_10959_lociStitched	chr10	41988784	41998224	5	3177	63181.9	10039.4	557	0.0580484	Naive	IK	Foxo3	0	IK_CKO_Naive|WT_Naive
11_OCR_15095_lociStitched	chr10	117519892	117559400	11	6380	59400.3	6491.16	558	0.0577935	Naive	IK	Mdm1	19442	IK_CKO_Naive|WT_Naive|WT_Treg
5_OCR_104130_lociStitched	chr7	133838691	133852068	5	4172	63151.5	10276.2	559	0.0577566	Naive	IK	Coro1a	0	IK_CKO_Naive|IK_CKO_Treg|WT_Naive|WT_Treg
15_OCR_59283_lociStitched	chr19	46574198	46603936	15	8174	72611.3	19766.8	560	0.0577229	Naive	IK	Trim8	0	IK_CKO_Naive|IK_CKO_Treg|WT_Naive|WT_Treg
15_OCR_89179_lociStitched	chr5	122708055	122768532	15	7792	71266.1	18427.3	561	0.0577167	Naive	IK	Gm15842	0	IK_CKO_Naive|IK_CKO_Treg|WT_Naive|WT_Treg
15_OCR_96423_lociStitched	chr6	119987022	120044826	15	8242	66145.1	13422.1	562	0.0575903	Naive	IK	Ninj2	0	IK_CKO_Naive|IK_CKO_Treg|WT_Naive|WT_Treg
5_OCR_98597_lociStitched	chr7	4594640	4611157	5	3117	59405	6699.3	563	0.0575714	Naive	IK	Ppp6r1	0	IK_CKO_Naive|IK_CKO_Treg|WT_Naive|WT_Treg
9_OCR_21712_lociStitched	chr11	120204621	120240598	9	5638	81286.4	28623.3	564	0.0575248	Naive	IK	2310003H01Rik	0	IK_CKO_Naive|IK_CKO_Treg|WT_Naive|WT_Treg
7_OCR_7336_lociStitched	chr1	173845731	173870084	7	4863	55420.1	2944.28	565	0.0573203	Naive	IK	Slamf6	0	IK_CKO_Naive|IK_CKO_Treg|WT_Naive|WT_Treg
1_OCR_7904_lociStitched	chr1	183140331	183142884	1	2554	58430.8	5983.72	566	0.0572888	Naive	IK	Wdr26	0	IK_CKO_Naive|IK_CKO_Treg|WT_Naive|WT_Treg
9_OCR_40625_lociStitched	chr15	57965543	58006917	9	6894	61663.8	9300.88	567	0.0571969	Naive	IK	SNORA11	0	IK_CKO_Naive|IK_CKO_Treg|WT_Naive|WT_Treg
8_OCR_59243_lociStitched	chr19	46106457	46132020	8	4795	67248.6	14987.6	568	0.0570856	Naive	IK	Pprc1	0	IK_CKO_Naive|IK_CKO_Treg|WT_Naive|WT_Treg
4_OCR_74177_lociStitched	chr3	115587819	115610718	4	2194	55733.9	3489.81	569	0.0570671	Naive	IK	Dph5	0	IK_CKO_Naive|WT_Naive
14_OCR_14208_lociStitched	chr10	98538703	98595354	14	9655	63828.7	11641.8	570	0.0570046	Naive	IK	Poc1b	0	IK_CKO_Naive|WT_Naive
20_OCR_40548_lociStitched	chr15	55626508	55698091	20	10980	55419.6	3235.55	571	0.0570015	Naive	IK	Sntb1	39773	IK_CKO_Naive|WT_Naive|WT_Treg
15_OCR_111575_lociStitched	chr9	13225831	13287581	15	7114	56248.1	4223.7	572	0.0568271	Naive	IK	Phxr4	0	IK_CKO_Naive|WT_Naive
9_OCR_60681_lociStitched	chr2	17947628	17987757	9	9553	74022	22038.8	573	0.056782	Naive	IK	Mllt10	0	IK_CKO_Naive|IK_CKO_Treg|WT_Naive|WT_Treg
3_OCR_36760_lociStitched	chr14	76228136	76245832	3	4187	60465.5	8483.46	574	0.0567808	Naive	IK	Tpt1	0	IK_CKO_Naive|IK_CKO_Treg|WT_Naive|WT_Treg
4_OCR_14238_lociStitched	chr10	98723952	98731778	4	3253	58526.7	6605.14	575	0.0567148	Naive	IK	Dusp6	0	IK_CKO_Naive|IK_CKO_Treg|WT_Naive|WT_Treg
24_OCR_41081_lociStitched	chr15	66581088	66657609	24	12154	62441.1	10751.2	576	0.0564618	Naive	IK	Tg	0	IK_CKO_Naive|IK_CKO_Treg|WT_Naive|WT_Treg
13_OCR_100251_lociStitched	chr7	52070966	52125776	13	8820	83914.1	32261.2	577	0.0564214	Naive	IK	Ptov1	0	IK_CKO_Naive|IK_CKO_Treg|WT_Naive|WT_Treg
8_OCR_57753_lociStitched	chr19	6045958	6085948	8	7074	78652.3	27049.2	578	0.0563669	Naive	IK	Cdca5	0	IK_CKO_Naive|IK_CKO_Treg|WT_Naive|WT_Treg
7_OCR_110125_lociStitched	chr8	117313516	117349865	7	4327	57111.5	5510.51	579	0.0563647	Naive	IK	Wwox	77448	IK_CKO_Naive|WT_Naive
5_OCR_42094_lociStitched	chr15	81337666	81354116	5	3897	57626	6032.22	580	0.0563568	Naive	IK	Gm5218	7687	IK_CKO_Naive|IK_CKO_Treg|WT_Naive|WT_Treg
8_OCR_49372_lociStitched	chr17	24263438	24319011	8	7038	70149.8	18561.4	581	0.0563509	Naive	IK	Atp6v0c	0	IK_CKO_Naive|IK_CKO_Treg|WT_Naive|WT_Treg
18_OCR_20273_lociStitched	chr11	98590423	98672021	18	12473	86379.6	34866.8	582	0.0562683	Naive	IK	Casc3	0	IK_CKO_Naive|IK_CKO_Treg|WT_Naive
4_OCR_112148_lociStitched	chr9	25059240	25075114	4	3403	57856	6384.52	583	0.0562231	Naive	IK	2021-09-07	0	IK_CKO_Naive|IK_CKO_Treg|WT_Naive|WT_Treg
7_OCR_95264_lociStitched	chr6	99034956	99060994	7	2733	55356.8	3897.89	584	0.0562094	Naive	IK	Foxp1	0	IK_CKO_Naive|IK_CKO_Treg|WT_Naive|WT_Treg
4_OCR_71252_lociStitched	chr3	51343553	51366146	4	5870	59625.2	8187.7	585	0.056186	Naive	IK	5031434O11Rik	0	IK_CKO_Naive|IK_CKO_Treg|WT_Naive|WT_Treg
13_OCR_36958_lociStitched	chr14	79667248	79731954	13	8300	63748.4	12397.7	586	0.0560912	Naive	IK	1190002H23Rik	0	IK_CKO_Naive|WT_Naive
12_OCR_20165_lociStitched	chr11	97627513	97702705	12	7867	75966.5	24640.4	587	0.0560643	Naive	IK	B230217C12Rik	0	IK_CKO_Naive|IK_CKO_Treg|WT_Naive|WT_Treg
2_OCR_23029_lociStitched	chr12	32634143	32635865	2	1611	54982.1	3673.2	588	0.0560456	Naive	IK	Hbp1	0	IK_CKO_Naive|WT_Naive
7_OCR_117750_lociStitched	chrX	98449274	98481185	7	5464	57672.8	6391.77	589	0.0560151	Naive	IK	Med12	0	IK_CKO_Naive|IK_CKO_Treg|WT_Naive|WT_Treg
34_OCR_36255_lociStitched	chr14	66794402	66901805	34	18537	66976.5	15874.2	590	0.05582	Naive	IK	Ptk2b	0	IK_CKO_Naive|IK_CKO_Treg|WT_Naive|WT_Treg
14_OCR_22340_lociStitched	chr12	15974251	16028803	14	8473	55664.9	4566	591	0.0558161	Naive	IK	Gm5432	150441	IK_CKO_Naive|IK_CKO_Treg|WT_Naive|WT_Treg
7_OCR_20627_lociStitched	chr11	103019883	103046526	7	3014	65147.5	14091.5	592	0.0557693	Naive	IK	Fmnl1	0	IK_CKO_Naive|IK_CKO_Treg|WT_Naive|WT_Treg
47_OCR_41013_lociStitched	chr15	63987342	64145086	47	23542	69959.5	18992.4	593	0.0556722	Naive	IK	Asap1	0	IK_CKO_Naive|IK_CKO_Treg|WT_Naive|WT_Treg
3_OCR_20696_lociStitched	chr11	104302752	104310215	3	2415	56602.4	5683.82	594	0.0556192	Naive	IK	1700081L11Rik	0	IK_CKO_Naive|IK_CKO_Treg|WT_Naive|WT_Treg
6_OCR_15441_lociStitched	chr10	122229005	122252914	6	5156	56138.3	5465.6	595	0.0553507	Naive	IK	Ppm1h	0	IK_CKO_Naive|WT_Naive|WT_Treg
10_OCR_50242_lociStitched	chr17	35225848	35273157	10	6349	76834.5	26190.3	596	0.0553196	Naive	IK	Bag6	0	IK_CKO_Naive|IK_CKO_Treg|WT_Naive|WT_Treg
5_OCR_108640_lociStitched	chr8	86565958	86598023	5	3826	64081.9	13515.4	597	0.0552347	Naive	IK	Rfx1	0	IK_CKO_Naive|IK_CKO_Treg|WT_Naive|WT_Treg
12_OCR_96460_lociStitched	chr6	120402978	120444297	12	8117	67688.8	17126.7	598	0.0552298	Naive	IK	Cecr6	0	IK_CKO_Naive|IK_CKO_Treg|WT_Naive|WT_Treg
12_OCR_20970_lociStitched	chr11	109222714	109247126	12	7140	61320.5	10819.4	599	0.0551632	Naive	IK	Gna13	0	IK_CKO_Naive|IK_CKO_Treg|WT_Naive|WT_Treg
9_OCR_11921_lociStitched	chr10	61939936	61971005	9	5803	57313	6962.56	600	0.0549986	Naive	IK	Srgn	0	IK_CKO_Naive|IK_CKO_Treg|WT_Naive|WT_Treg
10_OCR_18783_lociStitched	chr11	69793424	69843703	10	8899	79943.6	29609.3	601	0.054981	Naive	IK	Dlg4	0	IK_CKO_Naive|IK_CKO_Treg|WT_Naive|WT_Treg
10_OCR_7927_lociStitched	chr1	183771610	183819541	10	8618	63355.2	13022.9	602	0.0549789	Naive	IK	Gm5533	0	IK_CKO_Naive|IK_CKO_Treg|WT_Naive|WT_Treg
7_OCR_49799_lociStitched	chr17	29553072	29575634	7	3613	59877.3	9613.67	603	0.0549038	Naive	IK	Fgd2	39625	IK_CKO_Naive|IK_CKO_Treg|WT_Naive|WT_Treg
7_OCR_42155_lociStitched	chr15	82168889	82211194	7	4545	66363.9	16135.1	604	0.0548657	Naive	IK	Cyp2d22	0	IK_CKO_Naive|IK_CKO_Treg|WT_Naive|WT_Treg
10_OCR_84760_lociStitched	chr5	22892291	22924965	10	4446	57548.7	7338.58	605	0.0548454	Naive	IK	5031425E22Rik	14771	IK_CKO_Naive|IK_CKO_Treg|WT_Naive|WT_Treg
15_OCR_33649_lociStitched	chr14	14844727	14931623	15	10639	61852.6	11722.3	606	0.0547582	Naive	IK	Atxn7	0	IK_CKO_Naive|IK_CKO_Treg|WT_Naive|WT_Treg
40_OCR_76844_lociStitched	chr4	6785467	6918905	40	22556	60167.2	10234.7	607	0.0545421	Naive	IK	Tox	0	IK_CKO_Naive|IK_CKO_Treg|WT_Naive|WT_Treg
20_OCR_72272_lociStitched	chr3	78980848	79077254	20	12738	57776.1	7895.65	608	0.0544853	Naive	IK	U6	0	IK_CKO_Naive|IK_CKO_Treg|WT_Naive|WT_Treg
9_OCR_42010_lociStitched	chr15	80501718	80552683	9	6080	66346.2	16599.3	609	0.0543394	Naive	IK	Fam83f	0	IK_CKO_Naive|WT_Naive
8_OCR_18764_lociStitched	chr11	69707932	69762739	8	9019	78916.6	29294.3	610	0.0542032	Naive	IK	Slc2a4	0	IK_CKO_Naive|IK_CKO_Treg|WT_Naive|WT_Treg
5_OCR_24300_lociStitched	chr12	70328698	70359279	5	3262	56055	6464.82	611	0.0541682	Naive	IK	Klhdc1	0	IK_CKO_Naive|WT_Naive
6_OCR_111077_lociStitched	chr8	129175800	129191067	6	2955	53391.8	3828.96	612	0.0541383	Naive	IK	Irf2bp2	58463	IK_CKO_Naive|IK_CKO_Treg|WT_Naive
11_OCR_41587_lociStitched	chr15	76113611	76182323	11	8364	80633.5	31181.5	613	0.0540173	Naive	IK	Maf1	0	IK_CKO_Naive|WT_Naive
4_OCR_115136_lociStitched	chr9	96292480	96300322	4	1656	51617.6	2259.28	614	0.0539149	Naive	IK	Atp1b3	27713	IK_CKO_Naive|WT_Naive|WT_Treg
14_OCR_53505_lociStitched	chr18	6456217	6501847	14	6953	57169.8	7820.98	615	0.0539046	Naive	IK	Mir1893	0	IK_CKO_Naive|IK_CKO_Treg|WT_Naive|WT_Treg
17_OCR_116035_lociStitched	chr9	114639037	114707088	17	11080	71712.1	22388.8	616	0.0538767	Naive	IK	Gm9888	0	IK_CKO_Naive|IK_CKO_Treg|WT_Naive|WT_Treg
28_OCR_28312_lociStitched	chr13	23580377	23690310	28	16575	73391.3	24097.3	617	0.0538446	Naive	IK	Hist1h4d	0	IK_CKO_Naive|IK_CKO_Treg|WT_Naive|WT_Treg
8_OCR_25015_lociStitched	chr12	81358026	81400024	8	4557	59238.2	9945.13	618	0.0538436	Naive	IK	Gm17301	0	IK_CKO_Naive|WT_Naive
10_OCR_104147_lociStitched	chr7	133918061	133976092	10	5654	76862.1	27733	619	0.0536645	Naive	IK	4930451I11Rik	0	IK_CKO_Naive|IK_CKO_Treg|WT_Naive|WT_Treg
14_OCR_110462_lociStitched	chr8	122068950	122139966	14	10018	80510.8	31509.8	620	0.0535247	Naive	IK	Adad2	0	IK_CKO_Naive|WT_Naive
10_OCR_73846_lociStitched	chr3	106285221	106300284	10	4178	53383.3	4390.86	621	0.0535152	Naive	IK	Dennd2d	0	IK_CKO_Naive|IK_CKO_Treg|WT_Naive|WT_Treg
21_OCR_58629_lociStitched	chr19	32181770	32291519	21	10262	62842.3	13883.2	622	0.0534788	Naive	IK	Sgms1	0	IK_CKO_Naive|IK_CKO_Treg|WT_Naive|WT_Treg
9_OCR_67855_lociStitched	chr2	156942835	156974421	9	5492	54091	5224.32	623	0.0533779	Naive	IK	Mir5111	0	IK_CKO_Naive|IK_CKO_Treg|WT_Naive|WT_Treg
13_OCR_2720_lociStitched	chr1	74273787	74363101	13	10143	71862	23051.9	624	0.0533161	Naive	IK	Tmbim1	0	IK_CKO_Naive|IK_CKO_Treg|WT_Naive|WT_Treg
11_OCR_105390_lociStitched	chr8	3313783	3356089	11	6324	55611.2	6853.57	625	0.0532588	Naive	IK	A430078G23Rik	0	IK_CKO_Naive|IK_CKO_Treg|WT_Naive|WT_Treg
8_OCR_81922_lociStitched	chr4	126692487	126721202	8	4991	55101.2	6406.32	626	0.0531903	Naive	IK	Gm12940	0	IK_CKO_Naive|IK_CKO_Treg|WT_Naive|WT_Treg
14_OCR_19578_lociStitched	chr11	86381950	86410354	14	5766	59253.6	10580.5	627	0.0531664	Naive	IK	Vmp1	0	IK_CKO_Naive|IK_CKO_Treg|WT_Naive|WT_Treg
9_OCR_10899_lociStitched	chr10	41225230	41273124	9	7223	58727.6	10105.6	628	0.0531106	Naive	IK	Ccdc162	0	IK_CKO_Naive|IK_CKO_Treg|WT_Naive|WT_Treg
19_OCR_117240_lociStitched	chrX	45751862	45820569	19	10799	61321	12752	629	0.0530527	Naive	IK	Elf4	0	IK_CKO_Naive|IK_CKO_Treg|WT_Naive|WT_Treg
6_OCR_102829_lociStitched	chr7	108598865	108636141	6	4954	63212.6	14690.5	630	0.0530016	Naive	IK	Mir139	0	IK_CKO_Naive|IK_CKO_Treg|WT_Naive|WT_Treg
5_OCR_17950_lociStitched	chr11	53137990	53165487	5	2674	56533.8	8023.62	631	0.0529885	Naive	IK	Aff4	0	IK_CKO_Naive|IK_CKO_Treg|WT_Naive|WT_Treg
24_OCR_20230_lociStitched	chr11	98299780	98375262	24	12010	72425	24041	632	0.0528506	Naive	IK	Ikzf3	0	IK_CKO_Naive|IK_CKO_Treg|WT_Naive|WT_Treg
13_OCR_45891_lociStitched	chr16	45967588	46023027	13	7591	54807	6453.1	633	0.0528178	Naive	IK	U6	0	IK_CKO_Naive|IK_CKO_Treg|WT_Naive|WT_Treg
1_OCR_60949_lociStitched	chr2	22923286	22925236	1	1951	52045.3	3697.39	634	0.0528112	Naive	IK	Acbd5	0	IK_CKO_Naive|IK_CKO_Treg|WT_Naive|WT_Treg
8_OCR_118167_lociStitched	chrX	137054645	137087332	8	3454	52073.7	3732.86	635	0.0528035	Naive	IK	Tsc22d3	0	IK_CKO_Naive|IK_CKO_Treg|WT_Naive|WT_Treg
5_OCR_28371_lociStitched	chr13	24493624	24511757	5	3152	52161.4	3856.89	636	0.0527638	Naive	IK	Cmah	0	IK_CKO_Naive|IK_CKO_Treg|WT_Naive|WT_Treg
7_OCR_102315_lociStitched	chr7	97590813	97625491	7	5283	58543.4	10327.1	637	0.0526675	Naive	IK	Tmem126b	0	IK_CKO_Naive|IK_CKO_Treg|WT_Naive|WT_Treg
5_OCR_112338_lociStitched	chr9	31078763	31109755	5	4201	55742.2	7531.06	638	0.0526619	Naive	IK	Prdm10	0	IK_CKO_Naive|IK_CKO_Treg|WT_Naive|WT_Treg
8_OCR_98175_lociStitched	chr6	145277115	145328357	8	7811	61449.4	13287.1	639	0.0526086	Naive	IK	SNORA17	0	IK_CKO_Naive|WT_Naive
9_OCR_312_lociStitched	chr1	13345711	13379302	9	7369	58636.4	10524.1	640	0.052554	Naive	IK	Ncoa2	0	IK_CKO_Naive|IK_CKO_Treg|WT_Naive|WT_Treg
5_OCR_53113_lociStitched	chr17	88457236	88466038	5	3257	54832.9	6788.1	641	0.0524802	Naive	IK	Fbxo11	0	IK_CKO_Naive|IK_CKO_Treg|WT_Naive|WT_Treg
4_OCR_41959_lociStitched	chr15	80085221	80096985	4	2807	56980.1	8948.87	642	0.0524653	Naive	IK	Rps19bp1	0	IK_CKO_Naive|IK_CKO_Treg|WT_Naive|WT_Treg
39_OCR_72797_lociStitched	chr3	88244372	88468383	39	21833	122041	74058	643	0.0524128	Naive	IK	Rxfp4	0	IK_CKO_Naive|IK_CKO_Treg|WT_Naive|WT_Treg
4_OCR_20846_lociStitched	chr11	106963628	106994013	4	4029	55935.7	7982.14	644	0.0523805	Naive	IK	Bptf	0	IK_CKO_Naive|IK_CKO_Treg|WT_Naive|WT_Treg
12_OCR_31820_lociStitched	chr13	96713326	96758666	12	7598	55840.7	7911.83	645	0.0523536	Naive	IK	Sv2c	1102	IK_CKO_Naive|IK_CKO_Treg|WT_Naive|WT_Treg
15_OCR_54759_lociStitched	chr18	38565718	38624074	15	9374	57054.7	9132.71	646	0.052346	Naive	IK	Ndfip1	0	IK_CKO_Naive|IK_CKO_Treg|WT_Naive|WT_Treg
2_OCR_92470_lociStitched	chr6	39155034	39168401	2	2728	54792.7	6889.35	647	0.0523256	Naive	IK	Jhdm1d	0	IK_CKO_Naive|WT_Naive
12_OCR_3232_lociStitched	chr1	87617053	87660318	12	7953	54769.2	7034.89	648	0.052141	Naive	IK	A630001G21Rik	0	IK_CKO_Naive|IK_CKO_Treg|WT_Naive|WT_Treg
12_OCR_111658_lociStitched	chr9	14066656	14101160	12	6920	54126.4	6393.59	649	0.0521394	Naive	IK	Sesn3	0	IK_CKO_Naive|IK_CKO_Treg|WT_Naive|WT_Treg
7_OCR_73481_lociStitched	chr3	100358617	100372817	7	3434	49485.6	1789.2	650	0.0520996	Naive	IK	Gm12474	65029	IK_CKO_Naive|WT_Naive
16_OCR_12100_lociStitched	chr10	66942818	67012651	16	9840	66062	18408	651	0.0520533	Naive	IK	Ado	0	IK_CKO_Naive|IK_CKO_Treg|WT_Naive|WT_Treg
5_OCR_49451_lociStitched	chr17	25409371	25426056	5	2504	54436.5	6912.6	652	0.0519111	Naive	IK	Ube2i	0	IK_CKO_Naive|IK_CKO_Treg|WT_Naive|WT_Treg
6_OCR_101958_lociStitched	chr7	88131427	88153693	6	4782	54211	6737.69	653	0.0518559	Naive	IK	Zfp592	0	IK_CKO_Naive|IK_CKO_Treg|WT_Naive
15_OCR_47220_lociStitched	chr16	78532201	78602610	15	11208	59728	12349.7	654	0.051752	Naive	IK	D16Ertd472e	0	IK_CKO_Naive|IK_CKO_Treg|WT_Naive|WT_Treg
20_OCR_48314_lociStitched	chr17	3075180	3138740	20	11758	69604.6	22328.6	655	0.0516403	Naive	IK	Scaf8	0	IK_CKO_Naive|IK_CKO_Treg|WT_Naive|WT_Treg
19_OCR_29542_lociStitched	chr13	49337297	49422682	19	11154	67855.5	20688.8	656	0.051521	Naive	IK	Fgd3	0	IK_CKO_Naive|IK_CKO_Treg|WT_Naive|WT_Treg
17_OCR_12797_lociStitched	chr10	79316548	79400322	17	11859	106619	59638.7	657	0.0513176	Naive	IK	Arid3a	0	IK_CKO_Naive|IK_CKO_Treg|WT_Naive|WT_Treg
5_OCR_93354_lociStitched	chr6	56734987	56759131	5	3668	52213.8	5309.27	658	0.0512346	Naive	IK	Kbtbd2	0	IK_CKO_Naive|IK_CKO_Treg|WT_Naive|WT_Treg
8_OCR_59233_lociStitched	chr19	45846058	45890912	8	6741	60983.5	14111.1	659	0.0511996	Naive	IK	Kcnip2	0	IK_CKO_Naive|IK_CKO_Treg|WT_Naive|WT_Treg
6_OCR_68471_lociStitched	chr2	166518769	166545592	6	4714	57945.7	11303.2	660	0.0509484	Naive	IK	Prex1	0	IK_CKO_Naive|IK_CKO_Treg|WT_Naive|WT_Treg
8_OCR_86710_lociStitched	chr5	72550706	72575922	8	5221	49990.7	3394.07	661	0.0508983	Naive	IK	Commd8	0	IK_CKO_Naive|WT_Naive
4_OCR_53357_lociStitched	chr18	3328512	3338375	4	2625	51510.5	4955.17	662	0.0508532	Naive	IK	Gm6225	0	IK_CKO_Naive|IK_CKO_Treg|WT_Naive|WT_Treg
26_OCR_77329_lociStitched	chr4	15192392	15256176	26	13049	54918	8374.84	663	0.0508399	Naive	IK	Tmem64	0	IK_CKO_Naive|IK_CKO_Treg|WT_Naive|WT_Treg
10_OCR_20034_lociStitched	chr11	96316149	96337741	10	4263	50916.1	4596.94	664	0.0505952	Naive	IK	Skap1	0	IK_CKO_Naive|IK_CKO_Treg|WT_Naive|WT_Treg
2_OCR_80911_lociStitched	chr4	106850636	106857042	2	1801	50630.5	4359.92	665	0.0505421	Naive	IK	Tmem59	0	IK_CKO_Naive|IK_CKO_Treg|WT_Naive|WT_Treg
2_OCR_88320_lociStitched	chr5	109977327	109988184	2	3290	60843.7	14628.7	666	0.0504814	Naive	IK	Crlf2	0	IK_CKO_Naive|IK_CKO_Treg|WT_Naive|WT_Treg
5_OCR_98910_lociStitched	chr7	17426813	17444036	5	3551	55790.5	9591.49	667	0.0504639	Naive	IK	Prkd2	0	IK_CKO_Naive|IK_CKO_Treg|WT_Naive|WT_Treg
21_OCR_93232_lociStitched	chr6	54759444	54817767	21	11326	54596.2	8404.34	668	0.0504561	Naive	IK	Znrf2	0	IK_CKO_Naive|IK_CKO_Treg|WT_Naive|WT_Treg
14_OCR_99646_lociStitched	chr7	31202821	31239629	14	8007	63092.6	17042.1	669	0.0503017	Naive	IK	Kirrel2	0	IK_CKO_Naive|IK_CKO_Treg|WT_Naive|WT_Treg
3_OCR_92416_lociStitched	chr6	38500696	38507735	3	2007	51415	5366.53	670	0.0502995	Naive	IK	Luc7l2	0	IK_CKO_Naive|IK_CKO_Treg|WT_Naive|WT_Treg
27_OCR_64902_lociStitched	chr2	103465386	103562269	27	13965	65618.9	19647.9	671	0.0502149	Naive	IK	Abtb2	0	IK_CKO_Naive|IK_CKO_Treg|WT_Naive|WT_Treg
10_OCR_23798_lociStitched	chr12	52906645	52931313	10	5499	52843.8	6924.31	672	0.0501586	Naive	IK	Hectd1	0	IK_CKO_Naive|IK_CKO_Treg|WT_Naive|WT_Treg
9_OCR_41892_lociStitched	chr15	79553517	79583904	9	5157	60506.6	14719.5	673	0.0500141	Naive	IK	Gm16576	0	IK_CKO_Naive|IK_CKO_Treg|WT_Naive|WT_Treg
7_OCR_16213_lociStitched	chr11	6288709	6316858	7	5337	63698.4	17973.1	674	0.0499465	Naive	IK	Ppia	0	IK_CKO_Naive|IK_CKO_Treg|WT_Naive|WT_Treg
8_OCR_23992_lociStitched	chr12	56583741	56607448	8	4601	55758.9	10099.2	675	0.0498748	Naive	IK	Nfkbia	0	IK_CKO_Naive|IK_CKO_Treg|WT_Naive|WT_Treg
11_OCR_71998_lociStitched	chr3	68582046	68598836	11	4328	48444.2	2839.19	676	0.0498151	Naive	IK	Gm10040	44986	IK_CKO_Naive|IK_CKO_Treg|WT_Naive|WT_Treg
19_OCR_17673_lociStitched	chr11	48629940	48688327	19	10505	61446.5	16050.6	677	0.0495867	Naive	IK	Irgm1	0	IK_CKO_Naive|IK_CKO_Treg|WT_Naive|WT_Treg
6_OCR_64399_lociStitched	chr2	91022126	91043395	6	3882	54080.7	8807.49	678	0.0494527	Naive	IK	Acp2	0	IK_CKO_Naive|IK_CKO_Treg|WT_Naive|WT_Treg
2_OCR_7618_lociStitched	chr1	179178660	179189364	2	2698	51778.5	6619.35	679	0.0493281	Naive	IK	Akt3	0	IK_CKO_Naive|WT_Naive
11_OCR_104108_lociStitched	chr7	133607504	133647406	11	6407	67889.3	22875.8	680	0.049169	Naive	IK	Atxn2l	0	IK_CKO_Naive|IK_CKO_Treg|WT_Naive|WT_Treg
3_OCR_105463_lociStitched	chr8	4677266	4691947	3	2380	49824.4	4824.18	681	0.0491545	Naive	IK	Gm6410	0	IK_CKO_Naive|IK_CKO_Treg|WT_Naive|WT_Treg
3_OCR_15452_lociStitched	chr10	122412841	122425114	3	2529	51517.1	6516.96	682	0.0491545	Naive	IK	Mirlet7i	0	IK_CKO_Naive|IK_CKO_Treg|WT_Naive|WT_Treg
20_OCR_106314_lociStitched	chr8	26198959	26262740	20	10203	61873.9	16882.8	683	0.0491446	Naive	IK	Plekha2	0	IK_CKO_Naive|IK_CKO_Treg|WT_Naive|WT_Treg
16_OCR_1057_lociStitched	chr1	36931375	36997281	16	7309	55558.8	10571.3	684	0.0491405	Naive	IK	Tmem131	0	IK_CKO_Naive|IK_CKO_Treg|WT_Naive|WT_Treg
14_OCR_100298_lociStitched	chr7	52376702	52437958	14	7686	78628.2	33654	685	0.049126	Naive	IK	Pth2	0	IK_CKO_Naive|IK_CKO_Treg|WT_Naive|WT_Treg
20_OCR_1633_lociStitched	chr1	52155561	52234452	20	12059	60959.1	16046.4	686	0.0490588	Naive	IK	Gls	0	IK_CKO_Naive|IK_CKO_Treg|WT_Naive|WT_Treg
9_OCR_21489_lociStitched	chr11	117708138	117753849	9	6018	69256.7	24396	687	0.0490022	Naive	IK	Gm11725	0	IK_CKO_Naive|IK_CKO_Treg|WT_Naive|WT_Treg
7_OCR_49903_lociStitched	chr17	31194360	31220051	7	6213	53522.1	8665.57	688	0.0489975	Naive	IK	5S_rRNA	0	IK_CKO_Naive|IK_CKO_Treg|WT_Naive|WT_Treg
5_OCR_49719_lociStitched	chr17	28827801	28840000	5	3882	50939.4	6087.3	689	0.0489927	Naive	IK	Mapk14	0	IK_CKO_Naive|IK_CKO_Treg|WT_Naive|WT_Treg
24_OCR_76188_lociStitched	chr3	152540841	152645311	24	15355	59997.1	15189.9	690	0.0489436	Naive	IK	St6galnac5	0	IK_CKO_Naive|IK_CKO_Treg|WT_Naive|WT_Treg
4_OCR_50406_lociStitched	chr17	36389237	36409142	4	3118	53829.1	9052.79	691	0.0489099	Naive	IK	Trim39	0	IK_CKO_Naive|IK_CKO_Treg|WT_Naive|WT_Treg
12_OCR_104092_lociStitched	chr7	133467324	133521738	12	7587	60824	16063	692	0.0488932	Naive	IK	Spns1	0	IK_CKO_Naive|IK_CKO_Treg|WT_Naive|WT_Treg
13_OCR_14910_lociStitched	chr10	115968226	116020249	13	8009	53412	8729.46	693	0.0488075	Naive	IK	5330438D12Rik	0	IK_CKO_Naive|IK_CKO_Treg|WT_Naive|WT_Treg
4_OCR_1526_lociStitched	chr1	46900306	46921901	4	3565	50692.1	6066.04	694	0.0487458	Naive	IK	Slc39a10	0	IK_CKO_Naive|WT_Naive|WT_Treg
8_OCR_66002_lociStitched	chr2	126292596	126326629	8	3641	47176.5	2576.3	695	0.0487176	Naive	IK	Atp8b4	0	IK_CKO_Naive|WT_Naive
2_OCR_32821_lociStitched	chr13	112790890	112793660	2	2098	46549.8	2037.06	696	0.0486221	Naive	IK	Gm15323	2049	IK_CKO_Naive|IK_CKO_Treg|WT_Naive|WT_Treg
18_OCR_26120_lociStitched	chr12	103881403	103943982	18	12006	68655.4	24155.5	697	0.048608	Naive	IK	Mir1936	0	IK_CKO_Naive|IK_CKO_Treg|WT_Naive|WT_Treg
18_OCR_25335_lociStitched	chr12	88103208	88178005	18	12053	67998	23546.1	698	0.0485555	Naive	IK	7SK	0	IK_CKO_Naive|IK_CKO_Treg|WT_Naive|WT_Treg
6_OCR_828_lociStitched	chr1	30977568	31007487	6	4351	51158.5	6752.72	699	0.0485052	Naive	IK	Ptp4a1	0	IK_CKO_Naive|IK_CKO_Treg|WT_Naive|WT_Treg
23_OCR_59187_lociStitched	chr19	45080051	45156989	23	13175	83354.6	39038.3	700	0.0484074	Naive	IK	Kazald1	0	IK_CKO_Naive|IK_CKO_Treg|WT_Naive|WT_Treg
5_OCR_59365_lociStitched	chr19	47577088	47587881	5	3276	50004	5748.35	701	0.0483412	Naive	IK	Obfc1	0	IK_CKO_Naive|IK_CKO_Treg|WT_Naive|WT_Treg
5_OCR_48497_lociStitched	chr17	7012520	7040189	5	3589	50650.9	6480.08	702	0.0482485	Naive	IK	Gm2885	0	IK_CKO_Naive|IK_CKO_Treg|WT_Naive|WT_Treg
5_OCR_72960_lociStitched	chr3	90049286	90070538	5	4388	56951.1	12874.5	703	0.0481457	Naive	IK	Dennd4b	0	IK_CKO_Naive|IK_CKO_Treg|WT_Naive|WT_Treg
11_OCR_85338_lociStitched	chr5	34529716	34579009	11	5112	58762.2	14728.7	704	0.0480985	Naive	IK	Zfyve28	0	IK_CKO_Naive|IK_CKO_Treg|WT_Naive|WT_Treg
5_OCR_99332_lociStitched	chr7	26459271	26474989	5	4421	55970.2	12016.4	705	0.0480115	Naive	IK	Tgfb1	0	IK_CKO_Naive|IK_CKO_Treg|WT_Naive|WT_Treg
2_OCR_16136_lociStitched	chr11	5076615	5082178	2	1311	46370.4	2439.38	706	0.0479866	Naive	IK	Emid1	24354	IK_CKO_Naive|WT_Naive|WT_Treg
26_OCR_107171_lociStitched	chr8	47771890	47884932	26	13893	59618.4	15746.8	707	0.0479217	Naive	IK	Irf2	0	IK_CKO_Naive|IK_CKO_Treg|WT_Naive|WT_Treg
6_OCR_24147_lociStitched	chr12	60288842	60321278	6	4543	51745.2	7969.53	708	0.0478169	Naive	IK	Fbxo33	0	IK_CKO_Naive|IK_CKO_Treg|WT_Naive|WT_Treg
15_OCR_111410_lociStitched	chr9	7750617	7805521	15	8130	54514.2	10744.7	709	0.0478101	Naive	IK	CT030639.1	0	IK_CKO_Naive|IK_CKO_Treg|WT_Naive|WT_Treg
6_OCR_116465_lociStitched	chr9	121578290	121592130	6	3745	49846.1	6165.72	710	0.0477129	Naive	IK	Vipr1	458	IK_CKO_Naive|WT_Naive
17_OCR_48484_lociStitched	chr17	6936234	6999237	17	9024	65579.8	21912.4	711	0.0476986	Naive	IK	Ezr	0	IK_CKO_Naive|IK_CKO_Treg|WT_Naive|WT_Treg
7_OCR_59658_lociStitched	chr19	57418251	57450010	7	3905	52078.4	8463.77	712	0.047641	Naive	IK	Fam160b1	0	IK_CKO_Naive|IK_CKO_Treg|WT_Naive|WT_Treg
4_OCR_50125_lociStitched	chr17	34161130	34171391	4	3199	57279	13727.2	713	0.0475724	Naive	IK	Rxrb	0	IK_CKO_Naive|WT_Naive
8_OCR_16455_lociStitched	chr11	11445901	11474069	8	4666	45846.2	2414	714	0.0474418	Naive	IK	Gm11998	0	IK_CKO_Naive|WT_Naive
6_OCR_26525_lociStitched	chr12	110030366	110049835	6	3198	52011.4	8683.17	715	0.0473282	Naive	IK	Yy1	0	IK_CKO_Naive|IK_CKO_Treg|WT_Naive|WT_Treg
13_OCR_59262_lociStitched	chr19	46378661	46432699	13	9494	77733.7	34487.1	716	0.047239	Naive	IK	Tmem180	0	IK_CKO_Naive|IK_CKO_Treg|WT_Naive|WT_Treg
13_OCR_3919_lociStitched	chr1	97520743	97571123	13	7826	47830.8	4599.69	717	0.047222	Naive	IK	St8sia4	0	IK_CKO_Naive|IK_CKO_Treg|WT_Naive|WT_Treg
6_OCR_4682_lociStitched	chr1	127309043	127338848	6	4036	49091.8	5898.41	718	0.0471809	Naive	IK	Actr3	0	IK_CKO_Naive|IK_CKO_Treg|WT_Naive|WT_Treg
9_OCR_34709_lociStitched	chr14	32196344	32228738	9	5440	53382.1	10236.5	719	0.0471286	Naive	IK	Sh3bp5	0	IK_CKO_Naive|IK_CKO_Treg|WT_Naive|WT_Treg
29_OCR_3130_lociStitched	chr1	82783957	82876280	29	15961	58422	15316.4	720	0.047085	Naive	IK	Agfg1	0	IK_CKO_Naive|IK_CKO_Treg|WT_Naive|WT_Treg
26_OCR_43326_lociStitched	chr15	101003946	101115110	26	15546	90309.6	47211.4	721	0.047077	Naive	IK	9430023L20Rik	0	IK_CKO_Naive|IK_CKO_Treg|WT_Naive
4_OCR_25553_lociStitched	chr12	92820873	92829126	4	2761	49327.4	6281.36	722	0.0470199	Naive	IK	Gtf2a1	0	IK_CKO_Naive|IK_CKO_Treg|WT_Naive|WT_Treg
28_OCR_86782_lociStitched	chr5	73542028	73657206	28	15697	64073.5	21077.6	723	0.0469652	Naive	IK	Gm17207	0	IK_CKO_Naive|IK_CKO_Treg|WT_Naive|WT_Treg
19_OCR_81604_lociStitched	chr4	120642274	120729596	19	12268	60915.8	17927.2	724	0.0469572	Naive	IK	Col9a2	0	IK_CKO_Naive|IK_CKO_Treg|WT_Naive|WT_Treg
7_OCR_15331_lociStitched	chr10	120880582	120914088	7	5554	53720.2	10815.7	725	0.0468652	Naive	IK	Rassf3	0	IK_CKO_Naive|WT_Naive
8_OCR_106651_lociStitched	chr8	35160279	35188148	8	5072	49300.3	6407.08	726	0.0468529	Naive	IK	Mboat4	0	IK_CKO_Naive|IK_CKO_Treg|WT_Naive|WT_Treg
12_OCR_29193_lociStitched	chr13	43535266	43577240	12	6571	48379.2	5523.78	727	0.0468117	Naive	IK	Ranbp9	0	IK_CKO_Naive|IK_CKO_Treg|WT_Naive|WT_Treg
11_OCR_28358_lociStitched	chr13	23824399	23855876	11	7632	57077.2	14255.9	728	0.0467744	Naive	IK	Hist1h1a	0	IK_CKO_Naive|IK_CKO_Treg|WT_Naive|WT_Treg
14_OCR_115679_lociStitched	chr9	107416806	107490509	14	10880	82105.1	39298.4	729	0.0467585	Naive	IK	Ifrd2	0	IK_CKO_Naive|IK_CKO_Treg|WT_Naive|WT_Treg
14_OCR_48376_lociStitched	chr17	4993904	5064080	14	9301	61888.2	19144	730	0.0466902	Naive	IK	Arid1b	0	IK_CKO_Naive|WT_Naive
13_OCR_37662_lociStitched	chr14	103432289	103499326	13	9277	55915.6	13293.4	731	0.0465569	Naive	IK	Fbxl3	0	IK_CKO_Naive|IK_CKO_Treg|WT_Naive|WT_Treg
16_OCR_21266_lociStitched	chr11	115464599	115535802	16	8910	74706.2	32126.8	732	0.0465102	Naive	IK	Gm11702	0	IK_CKO_Naive|IK_CKO_Treg|WT_Naive|WT_Treg
4_OCR_39842_lociStitched	chr15	36211749	36234261	4	3025	48880.3	6328.12	733	0.0464805	Naive	IK	Rnf19a	0	IK_CKO_Naive|WT_Naive
20_OCR_71227_lociStitched	chr3	51131216	51226112	20	14545	66322.8	23771.4	734	0.0464796	Naive	IK	Naa15	0	IK_CKO_Naive|IK_CKO_Treg|WT_Naive|WT_Treg
2_OCR_91646_lociStitched	chr6	21899183	21905854	2	2004	46170	3747.77	735	0.0463385	Naive	IK	Ing3	0	IK_CKO_Naive|WT_Naive
29_OCR_118553_lociStitched	chrX	163526466	163620959	29	13679	45196	2891.49	736	0.0462099	Naive	IK	Gm15228	0	IK_CKO_Naive|IK_CKO_Treg|WT_Naive|WT_Treg
26_OCR_101844_lociStitched	chr7	87252948	87378113	26	16635	77865.1	35571.9	737	0.0461976	Naive	IK	D330012F22Rik	0	IK_CKO_Naive|IK_CKO_Treg|WT_Naive|WT_Treg
10_OCR_115697_lociStitched	chr9	107504400	107548229	10	6317	65677.8	23426.6	738	0.0461517	Naive	IK	Gnai2	0	IK_CKO_Naive|IK_CKO_Treg|WT_Naive|WT_Treg
13_OCR_58640_lociStitched	chr19	32309263	32350565	13	6598	47745.1	5683.16	739	0.045945	Naive	IK	Sgms1	0	IK_CKO_Naive|IK_CKO_Treg|WT_Naive|WT_Treg
10_OCR_96867_lociStitched	chr6	127092131	127128396	10	4846	54118.3	12065.4	740	0.0459351	Naive	IK	9330179D12Rik	0	IK_CKO_Naive|IK_CKO_Treg|WT_Naive|WT_Treg
10_OCR_21315_lociStitched	chr11	115835814	115892583	10	7812	72085.3	30064.9	741	0.0458996	Naive	IK	Unk	0	IK_CKO_Naive|IK_CKO_Treg|WT_Naive|WT_Treg
14_OCR_25043_lociStitched	chr12	81858724	81917997	14	8496	55847	13828.4	742	0.0458977	Naive	IK	4933426M11Rik	0	IK_CKO_Naive|IK_CKO_Treg|WT_Naive|WT_Treg
7_OCR_60993_lociStitched	chr2	24774494	24831911	7	7583	60730	18844.3	743	0.0457525	Naive	IK	Pnpla7	0	IK_CKO_Naive|IK_CKO_Treg|WT_Naive|WT_Treg
6_OCR_50819_lociStitched	chr17	47730081	47751245	6	4068	52586.2	10810.6	744	0.0456322	Naive	IK	Med20	0	IK_CKO_Naive|IK_CKO_Treg|WT_Naive|WT_Treg
16_OCR_57909_lociStitched	chr19	8994521	9073441	16	11034	70278.3	28553.3	745	0.0455769	Naive	IK	Ahnak	0	IK_CKO_Naive|IK_CKO_Treg|WT_Naive|WT_Treg
4_OCR_19462_lociStitched	chr11	82928741	82937781	4	1769	43824.1	2108.13	746	0.0455671	Naive	IK	Slfn1	0	IK_CKO_Naive|WT_Naive|WT_Treg
6_OCR_89382_lociStitched	chr5	124925235	124947606	6	4413	50502.5	8791.8	747	0.0455613	Naive	IK	Snrnp35	0	IK_CKO_Naive|IK_CKO_Treg|WT_Naive|WT_Treg
3_OCR_43094_lociStitched	chr15	98651791	98663494	3	2142	46247.9	4572.36	748	0.0455229	Naive	IK	Prkag1	0	IK_CKO_Naive|IK_CKO_Treg|WT_Naive|WT_Treg
4_OCR_2788_lociStitched	chr1	75120903	75139917	4	3337	51830.3	10225.7	749	0.0454453	Naive	IK	Fam134a	0	IK_CKO_Naive|IK_CKO_Treg|WT_Naive|WT_Treg
9_OCR_59131_lociStitched	chr19	44355229	44389868	9	6584	50936.6	9390.63	750	0.0453814	Naive	IK	Mir5114	0	IK_CKO_Naive|IK_CKO_Treg|WT_Naive|WT_Treg
28_OCR_60112_lociStitched	chr2	6586230	6664560	28	13996	49434.1	8036.66	751	0.0452191	Naive	IK	Celf2	0	IK_CKO_Naive|IK_CKO_Treg|WT_Naive|WT_Treg
12_OCR_36726_lociStitched	chr14	75576392	75597935	12	6226	49523	8138.95	752	0.0452046	Naive	IK	Lcp1	0	IK_CKO_Naive|IK_CKO_Treg|WT_Naive|WT_Treg
9_OCR_91973_lociStitched	chr6	30275945	30308111	9	4130	47293.7	5960.36	753	0.0451491	Naive	IK	5S_rRNA	0	IK_CKO_Naive|WT_Naive
8_OCR_3398_lociStitched	chr1	89743206	89773603	8	5253	48097.2	6787.65	754	0.0451231	Naive	IK	Dgkd	0	IK_CKO_Naive|WT_Naive
10_OCR_65782_lociStitched	chr2	121222331	121283515	10	7012	56619.7	15534.6	755	0.0448779	Naive	IK	2310003F16Rik	0	IK_CKO_Naive|IK_CKO_Treg|WT_Naive|WT_Treg
12_OCR_18116_lociStitched	chr11	54926830	54978559	12	7385	50947.9	9895.76	756	0.0448419	Naive	IK	Slc36a3	0	IK_CKO_Naive|IK_CKO_Treg|WT_Naive|WT_Treg
8_OCR_61358_lociStitched	chr2	30092722	30126388	8	4032	56535.3	15489.7	757	0.0448348	Naive	IK	Phyhd1	0	IK_CKO_Naive|IK_CKO_Treg|WT_Naive|WT_Treg
10_OCR_17189_lociStitched	chr11	31892384	31921910	10	5464	45248.6	4281.27	758	0.0447493	Naive	IK	Nsg2	0	IK_CKO_Naive|WT_Naive
18_OCR_14009_lociStitched	chr10	95663350	95737319	18	10319	46711.4	5754.79	759	0.0447376	Naive	IK	AC131596.1	36384	IK_CKO_Naive|WT_Naive|WT_Treg
9_OCR_94522_lociStitched	chr6	86797853	86826761	9	3968	47799.4	6862.76	760	0.0447158	Naive	IK	Aak1	0	IK_CKO_Naive|IK_CKO_Treg|WT_Naive|WT_Treg
6_OCR_85310_lociStitched	chr5	33971400	34011200	6	5065	54796.6	13870.3	761	0.0447045	Naive	IK	Tacc3	0	IK_CKO_Naive|IK_CKO_Treg|WT_Naive|WT_Treg
14_OCR_46065_lociStitched	chr16	49766221	49820026	14	10448	46794.2	5907.79	762	0.0446609	Naive	IK	Gm16619	0	IK_CKO_Naive|IK_CKO_Treg|WT_Naive|WT_Treg
12_OCR_89244_lociStitched	chr5	123463669	123527373	12	8323	60620.7	19792.8	763	0.044597	Naive	IK	Tmem120b	0	IK_CKO_Naive|IK_CKO_Treg|WT_Naive|WT_Treg
11_OCR_92488_lociStitched	chr6	39251593	39298708	11	5433	49272.9	8457.14	764	0.0445837	Naive	IK	Slc37a3	28962	IK_CKO_Naive|WT_Naive|WT_Treg
1_OCR_103465_lociStitched	chr7	121557864	121560286	1	2423	45155.3	4395.2	765	0.0445229	Naive	IK	Pde3b	0	IK_CKO_Naive|WT_Naive
4_OCR_35919_lociStitched	chr14	60736540	60757512	4	3148	43483.3	2726.36	766	0.0445195	Naive	IK	Gm6913	2387	IK_CKO_Naive|WT_Naive
6_OCR_104166_lociStitched	chr7	134157792	134171254	6	4188	54981.5	14324.9	767	0.0444099	Naive	IK	Maz	0	IK_CKO_Naive|IK_CKO_Treg|WT_Naive|WT_Treg
18_OCR_115595_lociStitched	chr9	106049881	106128853	18	11380	66439.1	25784.4	768	0.0444079	Naive	IK	Tlr9	0	IK_CKO_Naive|WT_Naive|WT_Treg
3_OCR_58989_lociStitched	chr19	41332607	41339310	3	2395	45930.3	5306.77	769	0.0443738	Naive	IK	Tm9sf3	0	IK_CKO_Naive|IK_CKO_Treg|WT_Naive|WT_Treg
6_OCR_81250_lociStitched	chr4	115714829	115748949	6	3857	48167.2	7612.17	770	0.0442989	Naive	IK	Lrrc41	0	IK_CKO_Naive|IK_CKO_Treg|WT_Naive|WT_Treg
1_OCR_116939_lociStitched	chrX	12647528	12650093	1	2566	44239.6	3774.14	771	0.0442011	Naive	IK	Usp9x	0	IK_CKO_Naive|IK_CKO_Treg|WT_Naive|WT_Treg
7_OCR_20406_lociStitched	chr11	100468546	100488536	7	4083	48367.8	7904.05	772	0.0441992	Naive	IK	Nkiras2	0	IK_CKO_Naive|WT_Naive|WT_Treg
6_OCR_97730_lociStitched	chr6	140656136	140671895	6	3711	42995.3	2548.23	773	0.044181	Naive	IK	Gm11077	5909	IK_CKO_Naive|WT_Naive
6_OCR_15837_lociStitched	chr10	127956016	127986616	6	5013	52215.8	11854.4	774	0.0440874	Naive	IK	Rpl41	0	IK_CKO_Naive|IK_CKO_Treg|WT_Naive|WT_Treg
12_OCR_54840_lociStitched	chr18	39606362	39657144	12	7800	52442.6	12202.9	775	0.0439545	Naive	IK	Nr3c1	0	IK_CKO_Naive|IK_CKO_Treg|WT_Naive|WT_Treg
9_OCR_32775_lociStitched	chr13	112247911	112280979	9	4522	47555.1	7341.1	776	0.0439264	Naive	IK	Gpbp1	0	IK_CKO_Naive|IK_CKO_Treg|WT_Naive|WT_Treg
9_OCR_89444_lociStitched	chr5	125848954	125892623	9	6284	51747.8	11546.1	777	0.043913	Naive	IK	Gm10382	0	IK_CKO_Naive|IK_CKO_Treg|WT_Naive|WT_Treg
5_OCR_32074_lociStitched	chr13	101420515	101440759	5	4579	48188.8	8127.97	778	0.0437591	Naive	IK	Ccdc125	0	IK_CKO_Naive|IK_CKO_Treg|WT_Naive|WT_Treg
2_OCR_54532_lociStitched	chr18	35113692	35118359	2	1592	44019.6	3994.49	779	0.0437201	Naive	IK	Hspa9	0	IK_CKO_Naive|IK_CKO_Treg|WT_Naive|WT_Treg
5_OCR_116472_lociStitched	chr9	121606214	121629467	5	4496	50256.7	10291.8	780	0.0436544	Naive	IK	Nktr	0	IK_CKO_Naive|IK_CKO_Treg|WT_Naive|WT_Treg
3_OCR_45401_lociStitched	chr16	35765665	35770784	3	2551	44170.8	4276.41	781	0.0435773	Naive	IK	Hspbap1	0	IK_CKO_Naive|WT_Naive
12_OCR_59300_lociStitched	chr19	46662296	46720557	12	6276	57841.5	17961.9	782	0.0435612	Naive	IK	D19Wsu162e	0	IK_CKO_Naive|IK_CKO_Treg|WT_Naive|WT_Treg
2_OCR_54612_lociStitched	chr18	36439963	36447544	2	3162	48762.5	8893.27	783	0.0435498	Naive	IK	Pura	0	IK_CKO_Naive|IK_CKO_Treg|WT_Naive
10_OCR_108491_lociStitched	chr8	84002624	84043664	10	6791	42316.3	2515.75	784	0.0434749	Naive	IK	Inpp4b	136162	IK_CKO_Naive|IK_CKO_Treg|WT_Naive|WT_Treg
7_OCR_15793_lociStitched	chr10	127519866	127534609	7	4010	49464.2	9665.51	785	0.0434728	Naive	IK	Baz2a	0	IK_CKO_Naive|IK_CKO_Treg|WT_Naive|WT_Treg
8_OCR_15994_lociStitched	chr11	3188471	3214581	8	5307	50314	10532.8	786	0.0434537	Naive	IK	Gm11944	0	IK_CKO_Naive|WT_Naive
2_OCR_16128_lociStitched	chr11	4991810	5000222	2	1866	45916.1	6156.74	787	0.0434298	Naive	IK	Rhbdd3	0	IK_CKO_Naive|IK_CKO_Treg|WT_Naive|WT_Treg
2_OCR_46407_lociStitched	chr16	56028930	56038382	2	2465	45553.9	5796.91	788	0.0434272	Naive	IK	SNORA70	0	IK_CKO_Naive|IK_CKO_Treg|WT_Naive|WT_Treg
11_OCR_54390_lociStitched	chr18	32511945	32560049	11	7064	50913.3	11174.6	789	0.0434073	Naive	IK	Bin1	0	IK_CKO_Naive|IK_CKO_Treg|WT_Naive|WT_Treg
12_OCR_72027_lociStitched	chr3	68802414	68849382	12	6656	49344.6	9623.74	790	0.0433877	Naive	IK	Trim59	0	IK_CKO_Naive|IK_CKO_Treg|WT_Naive|WT_Treg
3_OCR_42293_lociStitched	chr15	84866884	84873911	3	2260	44112.7	4393.98	791	0.0433854	Naive	IK	Fam118a	0	IK_CKO_Naive|WT_Naive
10_OCR_61732_lociStitched	chr2	34601265	34663901	10	5933	53585.1	13880.1	792	0.0433704	Naive	IK	Rabepk	0	IK_CKO_Naive|IK_CKO_Treg|WT_Naive|WT_Treg
21_OCR_11434_lociStitched	chr10	53725526	53812459	21	14386	48421.7	8745.46	793	0.043339	Naive	IK	Gm16998	0	IK_CKO_Naive|IK_CKO_Treg|WT_Naive|WT_Treg
3_OCR_113616_lociStitched	chr9	59777086	59790198	3	2588	41909.9	2331.31	794	0.0432323	Naive	IK	Nr2e3	6399	IK_CKO_Naive|IK_CKO_Treg|WT_Naive|WT_Treg
6_OCR_70732_lociStitched	chr3	36733697	36762849	6	4253	45109.8	5568.03	795	0.0431921	Naive	IK	4932438A13Rik	0	IK_CKO_Naive|WT_Naive
11_OCR_66376_lociStitched	chr2	132066286	132118336	11	8617	52482	13033.3	796	0.0430905	Naive	IK	Cds2	0	IK_CKO_Naive|IK_CKO_Treg|WT_Naive|WT_Treg
6_OCR_88696_lociStitched	chr5	115215426	115234148	6	3293	50341.6	10928	797	0.0430521	Naive	IK	Ankrd13a	0	IK_CKO_Naive|IK_CKO_Treg|WT_Naive|WT_Treg
2_OCR_19021_lociStitched	chr11	75149746	75162507	2	2302	43497.1	4143.5	798	0.0429867	Naive	IK	Smyd4	0	IK_CKO_Naive|WT_Naive|WT_Treg
5_OCR_21611_lociStitched	chr11	118936737	118953251	5	3978	55736.4	16395.1	799	0.0429732	Naive	IK	Cbx4	0	IK_CKO_Naive|WT_Naive
10_OCR_99350_lociStitched	chr7	26531925	26574095	10	6583	55255.4	15995.1	800	0.0428847	Naive	IK	Axl	0	IK_CKO_Naive|IK_CKO_Treg|WT_Naive|WT_Treg
6_OCR_50386_lociStitched	chr17	36157083	36180376	6	4529	44785.5	5532.09	801	0.0428771	Naive	IK	Gm6034	0	IK_CKO_Naive|IK_CKO_Treg|WT_Naive|WT_Treg
10_OCR_89354_lociStitched	chr5	124660675	124700359	10	6023	53386.9	14183.1	802	0.042823	Naive	IK	4930568K20Rik	0	IK_CKO_Naive|WT_Naive
7_OCR_34069_lociStitched	chr14	21480019	21527916	7	7159	56029.9	16883.7	803	0.0427601	Naive	IK	2310021P13Rik	0	IK_CKO_Naive|IK_CKO_Treg|WT_Naive|WT_Treg
10_OCR_73230_lociStitched	chr3	95754431	95801395	10	6497	52796.9	13680.6	804	0.0427274	Naive	IK	Plekho1	0	IK_CKO_Naive|IK_CKO_Treg|WT_Naive|WT_Treg
3_OCR_93030_lociStitched	chr6	51408896	51421248	3	4142	45635.7	6535.44	805	0.0427099	Naive	IK	Cbx3	0	IK_CKO_Naive|IK_CKO_Treg|WT_Naive|WT_Treg
4_OCR_43261_lociStitched	chr15	100495294	100500768	4	2390	42750.8	3814.83	806	0.0425305	Naive	IK	Bin2	0	IK_CKO_Naive|IK_CKO_Treg|WT_Naive|WT_Treg
12_OCR_44657_lociStitched	chr16	23087847	23152338	12	7732	51244.5	12317.8	807	0.0425204	Naive	IK	Adipoq	0	IK_CKO_Naive|IK_CKO_Treg|WT_Naive|WT_Treg
22_OCR_60250_lociStitched	chr2	9769903	9828032	22	10737	56071.2	17177.1	808	0.0424847	Naive	IK	Gm13262	0	IK_CKO_Naive|IK_CKO_Treg|WT_Naive|WT_Treg
10_OCR_80621_lociStitched	chr4	102165994	102195682	10	5137	42468.7	3595.22	809	0.0424621	Naive	IK	Pde4b	22991	IK_CKO_Naive|WT_Naive
7_OCR_26074_lociStitched	chr12	103581579	103609666	7	3934	45880.1	7139.72	810	0.0423168	Naive	IK	Rin3	0	IK_CKO_Naive|IK_CKO_Treg|WT_Naive|WT_Treg
13_OCR_22044_lociStitched	chr12	8666347	8719810	13	7343	46047.7	7308.39	811	0.0423156	Naive	IK	Pum2	0	IK_CKO_Naive|WT_Naive
2_OCR_16693_lociStitched	chr11	19819737	19826407	2	3470	45592.8	6928.13	812	0.0422341	Naive	IK	Spred2	0	IK_CKO_Naive|WT_Naive
8_OCR_91524_lociStitched	chr6	17005715	17037895	8	3734	44048	5425.55	813	0.0421879	Naive	IK	Tes	0	IK_CKO_Naive|IK_CKO_Treg|WT_Naive|WT_Treg
1_OCR_99422_lociStitched	chr7	28376209	28377851	1	1643	42164.4	3590.07	814	0.0421354	Naive	IK	Akt2	0	IK_CKO_Naive|IK_CKO_Treg|WT_Naive|WT_Treg
5_OCR_86417_lociStitched	chr5	65067479	65093832	5	3797	43271.6	4798.88	815	0.0420244	Naive	IK	AC122043.1	28490	IK_CKO_Naive|WT_Naive
3_OCR_110856_lociStitched	chr8	125885100	125909459	3	2568	47302.7	8908.09	816	0.0419391	Naive	IK	AC122266.1	0	IK_CKO_Naive|IK_CKO_Treg|WT_Naive|WT_Treg
12_OCR_39075_lociStitched	chr15	12111049	12160717	12	7399	48962.7	10569.4	817	0.0419377	Naive	IK	Mtmr12	0	IK_CKO_Naive|WT_Naive
4_OCR_23831_lociStitched	chr12	53703539	53719970	4	3666	42344.3	3963.16	818	0.0419244	Naive	IK	U6	0	IK_CKO_Naive|IK_CKO_Treg|WT_Naive|WT_Treg
7_OCR_82220_lociStitched	chr4	131579804	131606088	7	3752	43510.5	5167.43	819	0.0418828	Naive	IK	Gm13063	0	IK_CKO_Naive|WT_Naive
13_OCR_114298_lociStitched	chr9	75249297	75289926	13	7348	49673	11331.4	820	0.0418812	Naive	IK	Leo1	0	IK_CKO_Naive|IK_CKO_Treg|WT_Naive|WT_Treg
1_OCR_15940_lociStitched	chr11	3004680	3006066	1	1387	39701.6	1407.62	821	0.0418291	Naive	IK	Pisd-ps1	19840	IK_CKO_Naive|IK_CKO_Treg|WT_Naive|WT_Treg
5_OCR_9615_lociStitched	chr10	17441766	17453328	5	3512	44891.8	6646.99	822	0.0417754	Naive	IK	Cited2	0	IK_CKO_Naive|WT_Naive
8_OCR_71898_lociStitched	chr3	65726258	65762968	8	5522	46566.6	8325.83	823	0.0417711	Naive	IK	Ccnl1	0	IK_CKO_Naive|IK_CKO_Treg|WT_Naive|WT_Treg
13_OCR_18275_lociStitched	chr11	58976521	59052720	13	8607	65203.5	26982.1	824	0.0417499	Naive	IK	Arf1	0	IK_CKO_Naive|IK_CKO_Treg|WT_Naive|WT_Treg
4_OCR_52140_lociStitched	chr17	73345427	73359855	4	3179	41155.9	2943.31	825	0.0417402	Naive	IK	U6	8288	IK_CKO_Naive|WT_Naive
8_OCR_116457_lociStitched	chr9	121323423	121367895	8	3872	52739.3	14591.3	826	0.0416698	Naive	IK	Cck	36861	IK_CKO_Naive|WT_Naive
1_OCR_9846_lociStitched	chr10	20031549	20033105	1	1557	42798.1	4691.96	827	0.041624	Naive	IK	Bclaf1	0	IK_CKO_Naive|IK_CKO_Treg|WT_Naive|WT_Treg
13_OCR_82979_lociStitched	chr4	141091236	141151785	13	7908	61608.6	23517.2	828	0.0416079	Naive	IK	B330016D10Rik	0	IK_CKO_Naive|IK_CKO_Treg|WT_Naive|WT_Treg
2_OCR_116147_lociStitched	chr9	116274968	116278816	2	1993	39083.8	999.326	829	0.0416003	Naive	IK	Tgfbr2	190584	IK_CKO_Naive|WT_Naive
6_OCR_115142_lociStitched	chr9	96316196	96350353	6	3397	44633	6561.56	830	0.041586	Naive	IK	BC043934	0	IK_CKO_Naive|WT_Naive
8_OCR_14673_lociStitched	chr10	110593209	110634138	8	7761	47309.8	9241.77	831	0.0415824	Naive	IK	Osbpl8	0	IK_CKO_Naive|IK_CKO_Treg|WT_Naive|WT_Treg
10_OCR_9143_lociStitched	chr10	7648587	7676785	10	5340	44832	6764.7	832	0.0415816	Naive	IK	Tab2	0	IK_CKO_Naive|IK_CKO_Treg|WT_Naive|WT_Treg
3_OCR_21393_lociStitched	chr11	116703785	116715389	3	3536	48249.4	10186	833	0.0415773	Naive	IK	Mfsd11	0	IK_CKO_Naive|IK_CKO_Treg|WT_Naive|WT_Treg
1_OCR_65692_lociStitched	chr2	119302425	119304298	1	1874	42324	4342.18	834	0.0414882	Naive	IK	Ino80	0	IK_CKO_Naive|IK_CKO_Treg|WT_Naive|WT_Treg
4_OCR_41886_lociStitched	chr15	79517934	79524489	4	2045	44505.8	6550.41	835	0.0414593	Naive	IK	n-R5s40	0	IK_CKO_Naive|WT_Naive
3_OCR_96484_lociStitched	chr6	120772154	120792116	3	2750	43770.7	5836.89	836	0.0414357	Naive	IK	Bcl2l13	0	IK_CKO_Naive|WT_Naive
5_OCR_68392_lociStitched	chr2	165703408	165716371	5	3187	45106.1	7176.32	837	0.0414313	Naive	IK	Gm11465	0	IK_CKO_Naive|IK_CKO_Treg|WT_Naive|WT_Treg
4_OCR_108940_lociStitched	chr8	91215214	91225808	4	2334	42074.1	4256.67	839	0.0413086	Naive	IK	Cyld	0	IK_CKO_Naive|IK_CKO_Treg|WT_Naive|WT_Treg
12_OCR_87424_lociStitched	chr5	92503933	92571907	12	7807	52516.7	14757.2	840	0.0412454	Naive	IK	Gm15710	0	IK_CKO_Naive|WT_Naive
8_OCR_113687_lociStitched	chr9	61545638	61570053	8	4097	42267.2	4570.49	841	0.0411768	Naive	IK	Rplp1	192291	IK_CKO_Naive|WT_Naive
7_OCR_88377_lociStitched	chr5	111011929	111034920	7	3017	43087.4	5409.78	842	0.0411559	Naive	IK	Galnt9	0	IK_CKO_Naive|WT_Naive
5_OCR_95763_lociStitched	chr6	108778148	108794657	5	3518	43679.5	6052.2	843	0.041101	Naive	IK	Edem1	0	IK_CKO_Naive|IK_CKO_Treg|WT_Naive|WT_Treg
5_OCR_100340_lociStitched	chr7	52764900	52793958	5	3091	47823.7	10365	844	0.0409167	Naive	IK	Plekha4	0	IK_CKO_Naive|IK_CKO_Treg|WT_Naive|WT_Treg
1_OCR_7669_lociStitched	chr1	180248250	180249765	1	1516	41766	4321.39	845	0.0409014	Naive	IK	Fam36a	0	IK_CKO_Naive|IK_CKO_Treg|WT_Naive|WT_Treg
3_OCR_67702_lociStitched	chr2	154472493	154484135	3	1411	42779.7	5370.45	846	0.0408627	Naive	IK	Chmp4b	0	IK_CKO_Naive|IK_CKO_Treg|WT_Naive|WT_Treg
7_OCR_115169_lociStitched	chr9	96596323	96621213	7	5606	44630.3	7350.02	847	0.0407218	Naive	IK	Zbtb38	0	IK_CKO_Naive|IK_CKO_Treg|WT_Naive|WT_Treg
10_OCR_80677_lociStitched	chr4	102786619	102823783	10	5487	45191.4	7919.65	848	0.0407126	Naive	IK	Mier1	0	IK_CKO_Naive|IK_CKO_Treg|WT_Naive|WT_Treg
13_OCR_16961_lociStitched	chr11	23634142	23686783	13	7111	44597.5	7511.87	849	0.0405092	Naive	IK	U1	0	IK_CKO_Naive|IK_CKO_Treg|WT_Naive|WT_Treg
15_OCR_115383_lociStitched	chr9	100957409	101005981	15	7040	44419.1	7353.8	850	0.040487	Naive	IK	Msl2	0	IK_CKO_Naive|WT_Naive|WT_Treg
3_OCR_47760_lociStitched	chr16	91646269	91658847	3	2776	44258.2	7202.16	851	0.0404769	Naive	IK	Son	0	IK_CKO_Naive|IK_CKO_Treg|WT_Naive|WT_Treg
2_OCR_18304_lociStitched	chr11	59614020	59623919	2	1605	44649.4	7614.31	852	0.0404541	Naive	IK	Gm16062	0	IK_CKO_Naive|IK_CKO_Treg|WT_Naive|WT_Treg
15_OCR_81309_lociStitched	chr4	116768353	116829153	15	9466	66873.9	29858.9	853	0.0404322	Naive	IK	Snord55	0	IK_CKO_Naive|IK_CKO_Treg|WT_Naive|WT_Treg
2_OCR_95892_lociStitched	chr6	113025398	113027719	2	1924	43263.7	6338.88	854	0.0403336	Naive	IK	Setd5	0	IK_CKO_Naive|IK_CKO_Treg|WT_Naive|WT_Treg
11_OCR_10091_lociStitched	chr10	24341432	24371877	11	6018	41045.9	4259.26	855	0.0401827	Naive	IK	Enpp1	22186	IK_CKO_Naive|WT_Naive|WT_Treg
3_OCR_38898_lociStitched	chr15	8518333	8540073	3	2990	41790.8	5087.16	856	0.040092	Naive	IK	Gm2348	38898	IK_CKO_Naive|WT_Naive
15_OCR_936_lociStitched	chr1	34858335	34924440	15	9240	56129.8	19501	857	0.0400102	Naive	IK	Plekhb2	0	IK_CKO_Naive|IK_CKO_Treg|WT_Naive|WT_Treg
5_OCR_19076_lociStitched	chr11	75828730	75852302	5	3506	43565.8	7024.46	858	0.0399147	Naive	IK	Fam101b	0	IK_CKO_Naive|WT_Naive
6_OCR_89827_lociStitched	chr5	134642513	134663498	6	3137	45413.6	8914.43	859	0.0398687	Naive	IK	Gtf2ird2	0	IK_CKO_Naive|WT_Naive
14_OCR_63998_lociStitched	chr2	79067650	79112616	14	7920	41359.7	4896.8	860	0.0398291	Naive	IK	Itga4	0	IK_CKO_Naive|IK_CKO_Treg|WT_Naive|WT_Treg
7_OCR_76137_lociStitched	chr3	151854781	151875248	7	3895	41787.5	5354.17	861	0.0397967	Naive	IK	Fubp1	0	IK_CKO_Naive|WT_Naive
47_OCR_104507_lociStitched	chr7	139878149	140017126	47	21234	81454.4	45098	862	0.0397127	Naive	IK	Fam53b	0	IK_CKO_Naive|IK_CKO_Treg|WT_Naive|WT_Treg
2_OCR_115763_lociStitched	chr9	108409723	108420705	2	3018	42715.6	6481.58	863	0.039579	Naive	IK	Qrich1	0	IK_CKO_Naive|IK_CKO_Treg|WT_Naive|WT_Treg
6_OCR_43407_lociStitched	chr15	102206989	102237387	6	4812	46545.4	10323.2	864	0.0395662	Naive	IK	Sp1	0	IK_CKO_Naive|IK_CKO_Treg|WT_Naive|WT_Treg
5_OCR_90014_lociStitched	chr5	136645894	136677990	5	3914	44533.2	8325.7	865	0.0395501	Naive	IK	Prkrip1	0	IK_CKO_Naive|IK_CKO_Treg|WT_Naive|WT_Treg
4_OCR_6680_lociStitched	chr1	163168229	163181855	4	2688	40407.9	4221.33	866	0.0395272	Naive	IK	Prdx6	0	IK_CKO_Naive|WT_Naive
10_OCR_16447_lociStitched	chr11	11397806	11429582	10	6044	38318.7	2154.41	867	0.0395028	Naive	IK	4930415F15Rik	8536	IK_CKO_Naive|WT_Naive
11_OCR_112135_lociStitched	chr9	24944978	25001689	11	6822	43253.5	7173.94	868	0.0394103	Naive	IK	Herpud2	0	IK_CKO_Naive|IK_CKO_Treg|WT_Naive
3_OCR_21730_lociStitched	chr11	120433832	120443664	3	3114	45703.1	9626.51	869	0.039407	Naive	IK	Arhgdia	0	IK_CKO_Naive|IK_CKO_Treg|WT_Naive|WT_Treg
6_OCR_72036_lociStitched	chr3	68912800	68940325	6	3397	41642.6	5573.81	870	0.0393985	Naive	IK	Kpna4	0	IK_CKO_Naive|IK_CKO_Treg|WT_Naive|WT_Treg
6_OCR_50195_lociStitched	chr17	34723765	34742915	6	3994	50050.4	14012.1	871	0.0393653	Naive	IK	Agpat1	0	IK_CKO_Naive|IK_CKO_Treg|WT_Naive|WT_Treg
20_OCR_24940_lociStitched	chr12	80701084	80817064	20	10696	45962.9	9939.49	872	0.039349	Naive	IK	Rad51l1	286089	IK_CKO_Naive|IK_CKO_Treg|WT_Naive|WT_Treg
4_OCR_67155_lociStitched	chr2	146837667	146849608	4	2454	40207.7	4199.65	873	0.0393322	Naive	IK	Xrn2	0	IK_CKO_Naive|IK_CKO_Treg|WT_Naive|WT_Treg
2_OCR_85106_lociStitched	chr5	30061985	30073035	2	1593	40310.4	4307.29	874	0.0393268	Naive	IK	Dnajb6	0	IK_CKO_Naive|IK_CKO_Treg|WT_Naive|WT_Treg
4_OCR_87505_lociStitched	chr5	93685638	93697669	4	2860	39940.5	3955.79	875	0.0393067	Naive	IK	Ccng2	0	IK_CKO_Naive|WT_Naive|WT_Treg
15_OCR_107974_lociStitched	chr8	73000353	73084321	15	9242	79005.5	43025.2	876	0.0393019	Naive	IK	Ell	0	IK_CKO_Naive|IK_CKO_Treg|WT_Treg
10_OCR_96909_lociStitched	chr6	127383908	127425657	10	5649	43348	7389.57	877	0.039278	Naive	IK	Parp11	0	IK_CKO_Naive|IK_CKO_Treg|WT_Naive|WT_Treg
4_OCR_24302_lociStitched	chr12	70389592	70398819	4	2688	39503.6	3625.29	878	0.0391904	Naive	IK	Klhdc2	0	IK_CKO_Naive|WT_Naive
2_OCR_111875_lociStitched	chr9	20411398	20414752	2	1654	37776.4	1901.72	879	0.0391866	Naive	IK	5730577I03Rik	0	IK_CKO_Naive|WT_Naive
3_OCR_100367_lociStitched	chr7	52988620	52998335	3	2256	39566.3	3708.22	880	0.0391684	Naive	IK	Sult2b1	0	IK_CKO_Naive|WT_Naive|WT_Treg
17_OCR_81680_lociStitched	chr4	122506411	122588334	17	9161	46507.7	10666.4	881	0.0391501	Naive	IK	Cap1	0	IK_CKO_Naive|IK_CKO_Treg|WT_Naive|WT_Treg
12_OCR_88187_lociStitched	chr5	107629273	107667777	12	5510	41014.5	5328.95	882	0.0389799	Naive	IK	Gm8145	2864	IK_CKO_Naive|WT_Naive
12_OCR_90658_lociStitched	chr5	147860833	147889611	12	7523	46508.1	10843.6	883	0.038957	Naive	IK	Polr1d	0	IK_CKO_Naive|IK_CKO_Treg|WT_Naive|WT_Treg
7_OCR_102627_lociStitched	chr7	105822848	105852276	7	3905	44068.4	8416.41	884	0.0389433	Naive	IK	Prkrir	0	IK_CKO_Naive|IK_CKO_Treg|WT_Naive|WT_Treg
14_OCR_43206_lociStitched	chr15	99868810	99923669	14	8479	47985.2	12354.2	885	0.0389203	Naive	IK	Dip2b	0	IK_CKO_Naive|IK_CKO_Treg|WT_Naive|WT_Treg
5_OCR_35473_lociStitched	chr14	51543568	51576307	5	4684	44636.4	9045.79	886	0.0388762	Naive	IK	Pnp2	0	IK_CKO_Naive|WT_Naive
10_OCR_49090_lociStitched	chr17	15841191	15880968	10	6279	42998.9	7466.14	887	0.0388131	Naive	IK	Chd1	0	IK_CKO_Naive|WT_Naive
3_OCR_54500_lociStitched	chr18	34665562	34673657	3	2293	40560	5027.8	888	0.0388124	Naive	IK	n-R5s24	0	IK_CKO_Naive|WT_Naive
13_OCR_89148_lociStitched	chr5	122581102	122630022	13	7529	50994.2	15532.1	889	0.0387359	Naive	IK	Ppp1cc	0	IK_CKO_Naive|IK_CKO_Treg|WT_Naive|WT_Treg
13_OCR_102956_lociStitched	chr7	111435911	111470939	13	6234	37227.8	1796.94	890	0.0387017	Naive	IK	Gm15133	0	IK_CKO_Naive|WT_Naive|WT_Treg
10_OCR_67628_lociStitched	chr2	153144900	153177148	10	5567	44308.8	8881.1	891	0.0386982	Naive	IK	Asxl1	0	IK_CKO_Naive|IK_CKO_Treg|WT_Naive|WT_Treg
5_OCR_49636_lociStitched	chr17	27951629	27977366	5	4262	44265.1	8868.97	892	0.0386638	Naive	IK	Snrpc	0	IK_CKO_Naive|IK_CKO_Treg|WT_Naive|WT_Treg
8_OCR_10503_lociStitched	chr10	34000429	34048581	8	4729	42855.3	7482.82	893	0.0386379	Naive	IK	Tspyl4	0	IK_CKO_Naive|WT_Naive
2_OCR_42101_lociStitched	chr15	81407524	81416921	2	1805	40604.4	5242.59	894	0.0386263	Naive	IK	Ep300	0	IK_CKO_Naive|IK_CKO_Treg|WT_Naive|WT_Treg
3_OCR_115723_lociStitched	chr9	107904135	107913268	3	2432	38954.1	3698.86	895	0.0385099	Naive	IK	Ip6k1	0	IK_CKO_Naive|WT_Naive|WT_Treg
6_OCR_6768_lociStitched	chr1	164478143	164513491	6	4287	42304.5	7080.2	896	0.0384761	Naive	IK	Vamp4	0	IK_CKO_Naive|IK_CKO_Treg|WT_Naive|WT_Treg
6_OCR_1960_lociStitched	chr1	58851593	58863817	6	4063	38482.4	3342.04	897	0.0383844	Naive	IK	Casp8	0	IK_CKO_Naive|IK_CKO_Treg|WT_Naive|WT_Treg
4_OCR_87335_lociStitched	chr5	90782554	90796040	4	2675	41055.4	5960.81	898	0.0383344	Naive	IK	Ankrd17	0	IK_CKO_Naive|IK_CKO_Treg|WT_Naive|WT_Treg
6_OCR_94065_lociStitched	chr6	72818168	72850720	6	4399	42571.5	7483.7	899	0.038327	Naive	IK	Kcmf1	0	IK_CKO_Naive|IK_CKO_Treg|WT_Naive
4_OCR_17789_lociStitched	chr11	50172761	50192173	4	3118	44195.3	9111.99	900	0.0383221	Naive	IK	Hnrnph1	0	IK_CKO_Naive|WT_Naive
8_OCR_36632_lociStitched	chr14	73724651	73750595	8	6063	41487.1	6421.14	901	0.0383031	Naive	IK	Rb1	0	IK_CKO_Naive|WT_Naive
4_OCR_117613_lociStitched	chrX	91351401	91369037	4	2849	39033.8	3983.97	902	0.0382855	Naive	IK	Zfx	0	IK_CKO_Naive|IK_CKO_Treg|WT_Naive|WT_Treg
9_OCR_81238_lociStitched	chr4	115653354	115691355	9	4781	44940	9895.46	903	0.0382797	Naive	IK	Faah	0	IK_CKO_Naive|WT_Naive
13_OCR_24377_lociStitched	chr12	71198313	71255177	13	7863	46674	11662.8	904	0.0382433	Naive	IK	Abhd12b	0	IK_CKO_Naive|WT_Naive
2_OCR_57671_lociStitched	chr19	5388078	5390434	2	1882	38424.9	3455.07	905	0.0381982	Naive	IK	Sart1	0	IK_CKO_Naive|IK_CKO_Treg|WT_Naive|WT_Treg
5_OCR_17897_lociStitched	chr11	52033869	52054945	5	3596	41148.8	6227.96	906	0.0381446	Naive	IK	Skp1a	0	IK_CKO_Naive|WT_Naive
3_OCR_1477_lociStitched	chr1	43990264	44006929	3	2030	39079.4	4186.25	907	0.0381144	Naive	IK	Tpp2	0	IK_CKO_Naive|WT_Naive
9_OCR_64468_lociStitched	chr2	92023104	92046195	9	5022	40654	5775.06	908	0.0380989	Naive	IK	Mir1955	0	IK_CKO_Naive|IK_CKO_Treg|WT_Naive|WT_Treg
5_OCR_111878_lociStitched	chr9	20440656	20467084	5	4264	46759.1	11884.7	909	0.0380939	Naive	IK	Pin1	0	IK_CKO_Naive|WT_Naive|WT_Treg
4_OCR_56232_lociStitched	chr18	67883697	67900252	4	2159	40743.5	5992.91	910	0.0379587	Naive	IK	Ptpn2	0	IK_CKO_Naive|IK_CKO_Treg|WT_Naive|WT_Treg
8_OCR_29498_lociStitched	chr13	49050251	49074955	8	4049	41883.2	7134.52	911	0.0379565	Naive	IK	C030044B11Rik	0	IK_CKO_Naive|IK_CKO_Treg|WT_Naive|WT_Treg
3_OCR_19601_lociStitched	chr11	86565855	86574196	3	2065	40349.6	5606.82	912	0.0379501	Naive	IK	Cltc	0	IK_CKO_Naive|IK_CKO_Treg|WT_Naive|WT_Treg
16_OCR_68534_lociStitched	chr2	167308659	167387916	16	8502	64697.5	29990.8	913	0.0379107	Naive	IK	Gm11476	0	IK_CKO_Naive|IK_CKO_Treg|WT_Naive|WT_Treg
3_OCR_20382_lociStitched	chr11	100180868	100194766	3	1536	40425.1	5778.79	914	0.0378448	Naive	IK	Eif1	0	IK_CKO_Naive|IK_CKO_Treg|WT_Naive|WT_Treg
2_OCR_73258_lociStitched	chr3	96023136	96025625	2	2401	38855.5	4254.7	915	0.0377951	Naive	IK	Hist2h2be	0	IK_CKO_Naive|IK_CKO_Treg|WT_Naive|WT_Treg
14_OCR_62321_lociStitched	chr2	49306470	49379713	14	7602	43550.3	9001.56	916	0.0377382	Naive	IK	Epc2	0	IK_CKO_Naive|WT_Naive
13_OCR_21482_lociStitched	chr11	117621788	117672409	13	8311	63731.8	29198.2	917	0.0377217	Naive	IK	Syngr2	0	IK_CKO_Naive|IK_CKO_Treg|WT_Naive|WT_Treg
10_OCR_67836_lociStitched	chr2	156682643	156713256	10	5270	45570.5	11042.1	918	0.037716	Naive	IK	Sla2	0	IK_CKO_Naive|IK_CKO_Treg|WT_Naive|WT_Treg
6_OCR_116221_lociStitched	chr9	118296758	118310505	6	2674	36968.4	2441.47	919	0.0377144	Naive	IK	U4	65676	IK_CKO_Naive|WT_Naive
1_OCR_29911_lociStitched	chr13	56803865	56805819	1	1955	37595.7	3082.43	920	0.0376995	Naive	IK	Smad5	0	IK_CKO_Naive|WT_Naive
25_OCR_112724_lociStitched	chr9	40911796	41002516	25	14171	49769	15268.2	921	0.0376858	Naive	IK	Ubash3b	0	IK_CKO_Naive|IK_CKO_Treg|WT_Naive|WT_Treg
6_OCR_41499_lociStitched	chr15	74818754	74832292	6	3648	38435.7	3961.22	922	0.0376571	Naive	IK	Ly6a	0	IK_CKO_Naive|IK_CKO_Treg|WT_Treg
28_OCR_111714_lociStitched	chr9	14648194	14747651	28	13362	51160.7	16718.7	923	0.0376215	Naive	IK	Folr4	0	IK_CKO_Naive|IK_CKO_Treg|WT_Naive|WT_Treg
10_OCR_112039_lociStitched	chr9	21920994	21969974	10	6899	51169.4	16751.2	924	0.0375956	Naive	IK	Pigyl	0	IK_CKO_Naive|WT_Naive
4_OCR_57861_lociStitched	chr19	7557041	7573670	4	3439	42300.9	7893.79	925	0.0375834	Naive	IK	Atl3	0	IK_CKO_Naive|IK_CKO_Treg|WT_Naive|WT_Treg
5_OCR_2265_lociStitched	chr1	63159322	63177902	5	4886	39770.5	5373.34	926	0.0375726	Naive	IK	Gm11602	0	IK_CKO_Naive|IK_CKO_Treg|WT_Naive|WT_Treg
6_OCR_63460_lociStitched	chr2	70870001	70894445	6	4274	39491.7	5096.57	927	0.0375704	Naive	IK	Dcaf17	0	IK_CKO_Naive|WT_Naive
16_OCR_60933_lociStitched	chr2	22852983	22904637	16	8904	41075.3	6756.34	928	0.0374871	Naive	IK	Gm13357	0	IK_CKO_Naive|IK_CKO_Treg|WT_Naive|WT_Treg
6_OCR_29468_lociStitched	chr13	48593096	48624232	6	3228	38122.9	3848.41	929	0.0374386	Naive	IK	A830005F24Rik	0	IK_CKO_Naive|IK_CKO_Treg|WT_Naive|WT_Treg
8_OCR_32295_lociStitched	chr13	104683893	104712001	8	3910	41063	6849.92	930	0.0373715	Naive	IK	Erbb2ip	0	IK_CKO_Naive|IK_CKO_Treg|WT_Naive|WT_Treg
23_OCR_75224_lociStitched	chr3	137436366	137543629	23	12779	51615	17408.8	931	0.037364	Naive	IK	Dnajb14	0	IK_CKO_Naive|IK_CKO_Treg|WT_Naive|WT_Treg
10_OCR_89210_lociStitched	chr5	123130433	123184192	10	5184	47490.7	13289.2	932	0.0373589	Naive	IK	P2rx4	0	IK_CKO_Naive|WT_Naive
19_OCR_13584_lociStitched	chr10	90601015	90670401	19	10077	48237.1	14175.6	933	0.037206	Naive	IK	Tmpo	0	IK_CKO_Naive|IK_CKO_Treg|WT_Naive|WT_Treg
3_OCR_66394_lociStitched	chr2	132393187	132404905	3	2056	39119.4	5063.35	934	0.0372	Naive	IK	Gpcpd1	0	IK_CKO_Naive|IK_CKO_Treg|WT_Naive|WT_Treg
8_OCR_81101_lociStitched	chr4	111385900	111412279	8	3862	38231.1	4186.35	935	0.0371876	Naive	IK	Spata6	0	IK_CKO_Naive|IK_CKO_Treg|WT_Naive|WT_Treg
20_OCR_1611_lociStitched	chr1	52053545	52137206	20	11874	42458	8449.76	936	0.0371477	Naive	IK	Stat4	0	IK_CKO_Naive|IK_CKO_Treg|WT_Naive|WT_Treg
4_OCR_13104_lociStitched	chr10	82085213	82096030	4	3384	40333.3	6327.94	937	0.0371447	Naive	IK	Tdg	0	IK_CKO_Naive|IK_CKO_Treg|WT_Naive|WT_Treg
29_OCR_101589_lociStitched	chr7	82845690	82953075	29	16431	54454.9	20456.8	938	0.0371367	Naive	IK	AC158749.1	0	IK_CKO_Naive|IK_CKO_Treg|WT_Naive|WT_Treg
8_OCR_15848_lociStitched	chr10	128049740	128083844	8	5352	43898.7	9931.08	939	0.0371034	Naive	IK	Gm17336	0	IK_CKO_Naive|IK_CKO_Treg|WT_Naive|WT_Treg
19_OCR_74544_lociStitched	chr3	126273532	126333952	19	9763	42499.4	8537.35	940	0.0370974	Naive	IK	Camk2d	0	IK_CKO_Naive|IK_CKO_Treg|WT_Naive|WT_Treg
2_OCR_105261_lociStitched	chr7	150732518	150735481	2	1739	37523.1	3633.82	941	0.0370179	Naive	IK	Nap1l4	0	IK_CKO_Naive|WT_Naive
2_OCR_82470_lociStitched	chr4	134050690	134053564	2	1913	36473.9	2672.53	942	0.0369218	Naive	IK	Paqr7	0	IK_CKO_Naive
12_OCR_96770_lociStitched	chr6	125278307	125331086	12	6154	53903.2	20156.3	943	0.0368623	Naive	IK	Plekhg6	0	IK_CKO_Naive|WT_Naive
14_OCR_45569_lociStitched	chr16	38619050	38714754	14	10368	50895.4	17150.2	944	0.0368605	Naive	IK	Gm15530	0	IK_CKO_Naive|IK_CKO_Treg|WT_Naive|WT_Treg
26_OCR_59478_lociStitched	chr19	53553827	53653919	26	16560	58463.7	24762.8	945	0.0368121	Naive	IK	Dusp5	0	IK_CKO_Naive|IK_CKO_Treg|WT_Naive|WT_Treg
10_OCR_100387_lociStitched	chr7	53151693	53190904	10	5041	49770.5	16072.6	946	0.0368088	Naive	IK	Ccdc114	0	IK_CKO_Naive|IK_CKO_Treg|WT_Naive|WT_Treg
3_OCR_68324_lociStitched	chr2	164704066	164706030	3	1538	38233.6	4622.27	947	0.0367142	Naive	IK	Pcif1	0	IK_CKO_Naive|WT_Naive|WT_Treg
3_OCR_108130_lociStitched	chr8	74655818	74661098	3	2503	38880.3	5285.81	948	0.0366959	Naive	IK	Tpm4	0	IK_CKO_Naive|IK_CKO_Treg|WT_Naive|WT_Treg
1_OCR_18974_lociStitched	chr11	74536761	74538309	1	1549	38317.6	4725.42	949	0.0366933	Naive	IK	Pafah1b1	0	IK_CKO_Naive|IK_CKO_Treg|WT_Naive|WT_Treg
16_OCR_27298_lociStitched	chr13	3513281	3567897	16	6576	40415.8	6854.31	950	0.0366598	Naive	IK	Gdi2	0	IK_CKO_Naive|IK_CKO_Treg|WT_Naive|WT_Treg
8_OCR_97931_lociStitched	chr6	143114884	143137984	8	4521	40066.9	6521.13	951	0.0366427	Naive	IK	Etnk1	0	IK_CKO_Naive|WT_Naive|WT_Treg
6_OCR_106670_lociStitched	chr8	35267015	35292855	6	4257	37429.2	3901.84	952	0.0366225	Naive	IK	Tmem66	49397	IK_CKO_Naive|WT_Naive
16_OCR_92567_lociStitched	chr6	41041201	41102631	16	7232	36409.6	2887.21	953	0.036617	Naive	IK	Trbv16	0	IK_CKO_Naive|IK_CKO_Treg|WT_Naive|WT_Treg
9_OCR_10210_lociStitched	chr10	26065783	26096513	9	6889	40981.5	7473.54	954	0.0366013	Naive	IK	5S_rRNA	0	IK_CKO_Naive|WT_Naive
7_OCR_60478_lociStitched	chr2	13494851	13519283	7	4471	39140.1	5653.56	955	0.0365779	Naive	IK	Vim	0	IK_CKO_Naive|IK_CKO_Treg|WT_Naive|WT_Treg
13_OCR_83682_lociStitched	chr4	151346779	151414076	13	8650	73831.5	40358	956	0.0365637	Naive	IK	Nol9	0	IK_CKO_Naive|IK_CKO_Treg|WT_Naive
7_OCR_73465_lociStitched	chr3	100278807	100307175	7	5250	40997.4	7560.07	957	0.0365242	Naive	IK	Gm12474	0	IK_CKO_Naive|WT_Naive
2_OCR_6151_lociStitched	chr1	154749088	154752007	2	2192	38939.2	5544.93	958	0.0364771	Naive	IK	Smg7	0	IK_CKO_Naive|IK_CKO_Treg|WT_Treg
28_OCR_94271_lociStitched	chr6	82978308	83116653	28	21922	99248.7	65935.2	959	0.0363889	Naive	IK	Dctn1	0	IK_CKO_Naive|WT_Naive
7_OCR_97506_lociStitched	chr6	136741586	136763438	7	4489	40065.6	6885.57	960	0.0362432	Naive	IK	H2afj	0	IK_CKO_Naive|WT_Naive|WT_Treg
6_OCR_91615_lociStitched	chr6	18790158	18807417	6	4119	36625.3	3600.23	961	0.0360739	Naive	IK	Naa38	0	IK_CKO_Naive|WT_Naive
24_OCR_115657_lociStitched	chr9	107167126	107243240	24	15532	68114.4	35126.6	962	0.0360331	Naive	IK	6430571L13Rik	0	IK_CKO_Naive|IK_CKO_Treg|WT_Naive|WT_Treg
3_OCR_50222_lociStitched	chr17	35136709	35139813	3	2583	38638.6	5669.46	963	0.0360127	Naive	IK	Vars	0	IK_CKO_Naive|IK_CKO_Treg|WT_Naive|WT_Treg
3_OCR_99099_lociStitched	chr7	20204266	20220995	3	2677	42648.9	9746.32	964	0.0359401	Naive	IK	Relb	0	IK_CKO_Naive|IK_CKO_Treg|WT_Naive|WT_Treg
10_OCR_14028_lociStitched	chr10	95854120	95884410	10	4574	36632.7	3774.13	965	0.035892	Naive	IK	Btg1	195224	IK_CKO_Naive|IK_CKO_Treg|WT_Naive|WT_Treg
5_OCR_45429_lociStitched	chr16	35981680	35992860	5	2683	38236.7	5391	966	0.0358779	Naive	IK	Kpna1	0	IK_CKO_Naive
7_OCR_102754_lociStitched	chr7	107641279	107669645	7	4197	43124.8	10291.2	967	0.0358647	Naive	IK	Dnajb13	0	IK_CKO_Naive|IK_CKO_Treg|WT_Treg
8_OCR_93216_lociStitched	chr6	54701562	54729287	8	5032	36810.5	3978.54	968	0.0358629	Naive	IK	Znrf2	37622	IK_CKO_Naive|WT_Naive|WT_Treg
5_OCR_38936_lociStitched	chr15	9453738	9465357	5	2898	33632.4	916.739	969	0.0357358	Naive	IK	Il7r	0	IK_CKO_Naive|WT_Naive|WT_Treg
7_OCR_99775_lociStitched	chr7	35159229	35192992	7	4278	39810	7120.62	970	0.0357071	Naive	IK	Gm12764	0	IK_CKO_Naive|IK_CKO_Treg|WT_Naive|WT_Treg
4_OCR_21938_lociStitched	chr12	4913740	4938526	4	3561	40773	8092.63	971	0.0356973	Naive	IK	Atad2b	0	IK_CKO_Naive|IK_CKO_Treg
6_OCR_52878_lociStitched	chr17	85333444	85357525	6	2972	37836.1	5182.23	972	0.0356683	Naive	IK	Ppm1b	0	IK_CKO_Naive|WT_Naive|WT_Treg
14_OCR_61021_lociStitched	chr2	25066159	25161173	14	11602	78690.6	46081.8	973	0.0356192	Naive	IK	Grin1	0	IK_CKO_Naive|IK_CKO_Treg|WT_Naive
2_OCR_66184_lociStitched	chr2	128792662	128799703	2	1658	36944.1	4344.3	974	0.0356093	Naive	IK	Zc3h6	0	IK_CKO_Naive|IK_CKO_Treg|WT_Naive|WT_Treg
10_OCR_60796_lociStitched	chr2	19543144	19587987	10	6990	39591.9	7017.93	975	0.0355811	Naive	IK	Otud1	0	IK_CKO_Naive|WT_Naive
10_OCR_18331_lociStitched	chr11	59918258	59953757	10	7090	47110.7	14547.5	976	0.0355694	Naive	IK	Rai1	0	IK_CKO_Naive|IK_CKO_Treg|WT_Naive|WT_Treg
1_OCR_102273_lociStitched	chr7	97128393	97130237	1	1845	36525	3975.85	977	0.035554	Naive	IK	Eed	0	IK_CKO_Naive|IK_CKO_Treg|WT_Naive|WT_Treg
5_OCR_57697_lociStitched	chr19	5636787	5664013	5	4856	52453.6	19910.4	978	0.0355475	Naive	IK	Sipa1	0	IK_CKO_Naive|IK_CKO_Treg|WT_Naive|WT_Treg
4_OCR_73977_lociStitched	chr3	108356739	108375451	4	4015	38236.1	5776.39	979	0.0354563	Naive	IK	Taf13	0	IK_CKO_Naive|WT_Naive|WT_Treg
13_OCR_95255_lociStitched	chr6	98963216	99018005	13	8411	41798.5	9341.52	980	0.0354533	Naive	IK	Foxp1	0	IK_CKO_Naive|IK_CKO_Treg|WT_Naive|WT_Treg
2_OCR_19522_lociStitched	chr11	84683053	84694424	2	3166	40479.6	8055.22	981	0.0354177	Naive	IK	Myo19	0	IK_CKO_Naive|IK_CKO_Treg|WT_Naive|WT_Treg
9_OCR_1052_lociStitched	chr1	36817229	36854731	9	5152	47953.8	15537.1	982	0.0354093	Naive	IK	Zap70	0	IK_CKO_Naive|IK_CKO_Treg|WT_Naive|WT_Treg
7_OCR_85063_lociStitched	chr5	28620568	28656297	7	3181	38683.8	6281.16	983	0.0353939	Naive	IK	Rbm33	0	IK_CKO_Naive|WT_Naive
4_OCR_64419_lociStitched	chr2	91479161	91492279	4	1797	37038.7	4696.24	984	0.0353282	Naive	IK	Arhgap1	0	IK_CKO_Naive|WT_Naive
8_OCR_29133_lociStitched	chr13	42144363	42173511	8	4542	42048.9	9773.32	985	0.0352552	Naive	IK	Hivep1	0	IK_CKO_Naive|IK_CKO_Treg|WT_Treg
1_OCR_94480_lociStitched	chr6	86387718	86389331	1	1614	34383.8	2119.16	986	0.0352433	Naive	IK	C87436	0	IK_CKO_Naive
2_OCR_102378_lociStitched	chr7	100015124	100024088	2	1859	35846.1	3605.32	987	0.0352172	Naive	IK	Prcp	0	IK_CKO_Naive|IK_CKO_Treg|WT_Naive|WT_Treg
4_OCR_15833_lociStitched	chr10	127928709	127942300	4	3416	38787.4	6567.17	988	0.0351947	Naive	IK	A430046D13Rik	0	IK_CKO_Naive|IK_CKO_Treg|WT_Naive|WT_Treg
13_OCR_63545_lociStitched	chr2	71974208	72042024	13	6605	38716.2	6503.55	989	0.0351864	Naive	IK	Rapgef4	0	IK_CKO_Naive|WT_Naive
8_OCR_50290_lociStitched	chr17	35516000	35532150	8	3530	38879.5	6695.79	990	0.0351548	Naive	IK	H2-Q5	0	IK_CKO_Naive|IK_CKO_Treg|WT_Treg
7_OCR_113522_lociStitched	chr9	57592610	57622324	7	3642	43174.4	11020.9	991	0.0351218	Naive	IK	Clk3	0	IK_CKO_Naive|IK_CKO_Treg|WT_Naive|WT_Treg
7_OCR_52218_lociStitched	chr17	74153888	74173281	7	4240	37065.8	4916.13	992	0.0351177	Naive	IK	Ehd3	0	IK_CKO_Naive|WT_Naive
10_OCR_36482_lociStitched	chr14	70671172	70689889	10	5126	36982.9	4838.34	993	0.0351121	Naive	IK	Ppp3cc	0	IK_CKO_Naive|IK_CKO_Treg|WT_Treg
4_OCR_82231_lociStitched	chr4	131816301	131830815	4	4163	38119.6	5975.41	994	0.0351116	Naive	IK	Taf12	0	IK_CKO_Naive|IK_CKO_Treg|WT_Naive|WT_Treg
5_OCR_35727_lociStitched	chr14	56196814	56223476	5	4911	45760	13653.6	995	0.0350703	Naive	IK	Irf9	0	IK_CKO_Naive|IK_CKO_Treg|WT_Naive|WT_Treg
3_OCR_99641_lociStitched	chr7	31177731	31187663	3	2004	33862.2	1783.79	996	0.0350398	Naive	IK	Tyrobp	11143	IK_CKO_Naive|WT_Naive|WT_Treg
14_OCR_43383_lociStitched	chr15	102033481	102094060	14	10870	60445.7	28369.1	997	0.0350378	Naive	IK	Rarg	0	IK_CKO_Naive|IK_CKO_Treg|WT_Naive|WT_Treg
14_OCR_114871_lociStitched	chr9	89963525	90021975	14	7014	43066	11006.1	998	0.0350195	Naive	IK	Gm17659	0	IK_CKO_Naive|IK_CKO_Treg|WT_Treg
3_OCR_54648_lociStitched	chr18	36884942	36905072	3	4146	39625.9	7582.97	999	0.035001	Naive	IK	Ik	0	IK_CKO_Naive|IK_CKO_Treg|WT_Treg
6_OCR_69719_lociStitched	chr3	9816473	9834158	6	3870	37039.5	5036.69	1000	0.0349572	Naive	IK	5S_rRNA	0	IK_CKO_Naive|WT_Naive
1_OCR_50017_lociStitched	chr17	32420341	32422065	1	1725	36755	4784.1	1001	0.0349223	Naive	IK	Gm17549	0	IK_CKO_Naive|IK_CKO_Treg|WT_Treg
5_OCR_21466_lociStitched	chr11	117515175	117548065	5	3876	40125.8	8196.19	1002	0.0348773	Naive	IK	Tnrc6c	0	IK_CKO_Naive|WT_Naive
7_OCR_102304_lociStitched	chr7	97490010	97512589	7	4155	35040.4	3138.48	1003	0.034847	Naive	IK	Sytl2	0	IK_CKO_Naive|IK_CKO_Treg|WT_Naive|WT_Treg
1_OCR_29972_lociStitched	chr13	58502767	58504652	1	1886	37497	5603.16	1004	0.0348382	Naive	IK	Rmi1	0	IK_CKO_Naive|IK_CKO_Treg|WT_Naive|WT_Treg
5_OCR_7860_lociStitched	chr1	182723586	182744650	5	3799	40242.8	8351.88	1005	0.034835	Naive	IK	Gm16067	0	IK_CKO_Naive|WT_Naive
2_OCR_114715_lociStitched	chr9	85641869	85653263	2	2196	36113.3	4245.4	1006	0.0348098	Naive	IK	Ibtk	0	IK_CKO_Naive|IK_CKO_Treg|WT_Naive|WT_Treg
18_OCR_49355_lociStitched	chr17	23899119	23990550	18	10736	64157.1	32293.4	1007	0.0348053	Naive	IK	Prss32	0	IK_CKO_Naive|IK_CKO_Treg|WT_Treg
5_OCR_89185_lociStitched	chr5	122821712	122851652	5	4164	41727.4	9913.13	1008	0.0347512	Naive	IK	Arpc3	0	IK_CKO_Naive|IK_CKO_Treg|WT_Treg
4_OCR_89100_lociStitched	chr5	121779494	121791966	4	3349	35223.4	3413.59	1009	0.0347464	Naive	IK	Gm15800	6760	IK_CKO_Naive|WT_Naive
20_OCR_16055_lociStitched	chr11	4086441	4168902	20	12600	64352.6	32555.6	1010	0.0347324	Naive	IK	Lif	0	IK_CKO_Naive|IK_CKO_Treg|WT_Naive|WT_Treg
2_OCR_15422_lociStitched	chr10	122115383	122117863	2	2172	35904.2	4161.94	1011	0.0346726	Naive	IK	Ppm1h	0	IK_CKO_Naive|WT_Naive
2_OCR_64925_lociStitched	chr2	103624842	103638252	2	2646	36928.5	5231.24	1012	0.0346234	Naive	IK	Caprin1	0	IK_CKO_Naive|IK_CKO_Treg|WT_Naive|WT_Treg
21_OCR_14236_lociStitched	chr10	98612692	98707866	21	12806	43998.9	12315.5	1013	0.0346083	Naive	IK	Poc1b	0	IK_CKO_Naive|IK_CKO_Treg|WT_Naive|WT_Treg
6_OCR_100431_lociStitched	chr7	54086162	54102793	6	4843	39204.3	7558.79	1014	0.0345669	Naive	IK	Ldha	0	IK_CKO_Naive|IK_CKO_Treg|WT_Naive|WT_Treg
1_OCR_19854_lociStitched	chr11	93746082	93747946	1	1865	36879.1	5243.43	1015	0.0345561	Naive	IK	Mbtd1	0	IK_CKO_Naive|IK_CKO_Treg|WT_Naive|WT_Treg
2_OCR_96455_lociStitched	chr6	120306890	120314896	2	2394	35068.7	3522.64	1016	0.0344583	Naive	IK	Kdm5a	0	IK_CKO_Naive|WT_Naive|WT_Treg
8_OCR_17995_lociStitched	chr11	53652622	53673137	8	5080	37394.7	5869.34	1017	0.0344357	Naive	IK	Gm12216	0	IK_CKO_Naive|WT_Treg
7_OCR_113146_lociStitched	chr9	48772718	48806142	7	2525	38093.3	6581.19	1018	0.0344213	Naive	IK	Usp28	0	IK_CKO_Naive|WT_Naive
7_OCR_116810_lociStitched	chrX	7418092	7461752	7	5582	37220.2	5715.09	1019	0.0344135	Naive	IK	Slc35a2	0	IK_CKO_Naive|WT_Naive
17_OCR_21090_lociStitched	chr11	113014672	113070909	17	9273	49533.5	18035.2	1020	0.0344062	Naive	IK	2610035D17Rik	0	IK_CKO_Naive|IK_CKO_Treg|WT_Naive
3_OCR_28424_lociStitched	chr13	24891941	24894561	3	1992	35799.9	4315.14	1021	0.0343914	Naive	IK	BC005537	0	IK_CKO_Naive|IK_CKO_Treg|WT_Naive|WT_Treg
36_OCR_83702_lociStitched	chr4	151460453	151589096	36	22646	98090.3	66727.1	1022	0.0342585	Naive	IK	Gm13096	0	IK_CKO_Naive|IK_CKO_Treg|WT_Naive|WT_Treg
4_OCR_94458_lociStitched	chr6	85910990	85920200	4	2374	35651.9	4295.54	1023	0.0342511	Naive	IK	Dusp11	0	IK_CKO_Naive|WT_Naive
2_OCR_58495_lociStitched	chr19	28084308	28086724	2	2144	35549.5	4214.71	1024	0.0342275	Naive	IK	Rfx3	0	IK_CKO_Naive
4_OCR_18713_lociStitched	chr11	69179670	69186198	4	2598	36603.1	5268.75	1025	0.0342271	Naive	IK	Chd3	0	IK_CKO_Naive|IK_CKO_Treg|WT_Naive|WT_Treg
7_OCR_49317_lociStitched	chr17	23721743	23767847	7	5476	41378.3	10064.5	1026	0.0342046	Naive	IK	Zscan10	0	IK_CKO_Naive|WT_Naive
5_OCR_7273_lociStitched	chr1	173309937	173328233	5	3329	37975.2	6672.55	1027	0.0341924	Naive	IK	Arhgap30	0	IK_CKO_Naive|IK_CKO_Treg|WT_Treg
5_OCR_93981_lociStitched	chr6	71858441	71884633	5	2598	37108.8	5812	1028	0.034186	Naive	IK	Polr1a	0	IK_CKO_Naive|WT_Naive
3_OCR_61149_lociStitched	chr2	26757988	26772568	3	3507	39963.8	8667.81	1029	0.0341851	Naive	IK	Surf2	0	IK_CKO_Naive|IK_CKO_Treg|WT_Naive|WT_Treg
58_OCR_13039_lociStitched	chr10	80840672	81075816	58	31345	173913	142638	1030	0.0341613	Naive	IK	BC025920	0	IK_CKO_Naive|IK_CKO_Treg|WT_Treg
4_OCR_30044_lociStitched	chr13	59870645	59881124	4	2320	36235.3	5028.87	1031	0.0340873	Naive	IK	Etohd2	0	IK_CKO_Naive|IK_CKO_Treg|WT_Naive|WT_Treg
13_OCR_75730_lociStitched	chr3	145567795	145632626	13	8396	44305.5	13147.7	1032	0.0340342	Naive	IK	2410004B18Rik	0	IK_CKO_Naive|IK_CKO_Treg|WT_Naive|WT_Treg
1_OCR_73211_lociStitched	chr3	95622562	95623885	1	1324	34273.5	3165.54	1033	0.0339798	Naive	IK	Rprd2	0	IK_CKO_Naive
1_OCR_1927_lociStitched	chr1	58449210	58450971	1	1762	35310.3	4242.07	1034	0.0339364	Naive	IK	Bzw1	0	IK_CKO_Naive|WT_Naive
2_OCR_20515_lociStitched	chr11	101413075	101424112	2	1886	33267.7	2206.3	1035	0.0339289	Naive	IK	Nbr1	0	IK_CKO_Naive|WT_Treg
4_OCR_27910_lociStitched	chr13	14149188	14157278	4	2449	35943.9	4926.81	1036	0.0338805	Naive	IK	Arid4b	0	IK_CKO_Naive
7_OCR_24440_lociStitched	chr12	72100029	72117984	7	4368	37344.6	6347.09	1037	0.0338591	Naive	IK	Arid4a	0	IK_CKO_Naive
1_OCR_49550_lociStitched	chr17	26852282	26853715	1	1434	35315.7	4338.98	1038	0.0338364	Naive	IK	A930001N09Rik	0	IK_CKO_Naive
7_OCR_77969_lociStitched	chr4	34828251	34847782	7	2954	38653.8	7677.64	1039	0.0338358	Naive	IK	Cga	0	IK_CKO_Naive
5_OCR_49249_lociStitched	chr17	21625560	21654087	5	4681	35036.9	4113.59	1040	0.033778	Naive	IK	Zfp53	0	IK_CKO_Naive|WT_Naive|WT_Treg
3_OCR_18450_lociStitched	chr11	62270009	62280651	3	2855	36070	5172.01	1041	0.0337504	Naive	IK	Pigl	0	IK_CKO_Naive|IK_CKO_Treg|WT_Naive|WT_Treg
4_OCR_34110_lociStitched	chr14	21870907	21898103	4	2923	37628.4	6736.45	1042	0.0337438	Naive	IK	Adk	0	IK_CKO_Naive
25_OCR_111735_lociStitched	chr9	14769836	14850524	25	13126	46968.5	16097.3	1043	0.0337212	Naive	IK	Panx1	0	IK_CKO_Naive|IK_CKO_Treg|WT_Treg
7_OCR_19181_lociStitched	chr11	77767108	77798296	7	3191	46370.3	15531.6	1044	0.0336856	Naive	IK	Phf12	0	IK_CKO_Naive|WT_Treg
12_OCR_16154_lociStitched	chr11	5311524	5345601	12	6500	36377.2	5554.55	1045	0.0336681	Naive	IK	Znrf3	0	IK_CKO_Naive|WT_Naive
7_OCR_116298_lociStitched	chr9	119230987	119267229	7	4881	45585.2	14765	1046	0.0336654	Naive	IK	Xylb	0	IK_CKO_Naive|IK_CKO_Treg|WT_Treg
7_OCR_78078_lociStitched	chr4	40719800	40733117	7	3077	34321.9	3505.03	1047	0.0336618	Naive	IK	Gm12396	0	IK_CKO_Naive|IK_CKO_Treg|WT_Naive|WT_Treg
3_OCR_91971_lociStitched	chr6	30250142	30262414	3	2612	34827.9	4017.85	1048	0.0336544	Naive	IK	1700095J07Rik	0	IK_CKO_Naive|WT_Naive
27_OCR_43012_lociStitched	chr15	97571545	97680808	27	17047	78002.9	47212.5	1049	0.0336328	Naive	IK	Gm17532	0	IK_CKO_Naive|IK_CKO_Treg|WT_Naive
3_OCR_73745_lociStitched	chr3	104657168	104668519	3	2654	35168.8	4388.3	1050	0.0336221	Naive	IK	St7l	0	IK_CKO_Naive|IK_CKO_Treg|WT_Treg
3_OCR_102885_lociStitched	chr7	109358122	109372054	3	2545	36662.1	5886.27	1051	0.0336169	Naive	IK	Pgap2	0	IK_CKO_Naive|IK_CKO_Treg|WT_Treg
16_OCR_117358_lociStitched	chrX	54419881	54492268	16	6933	32364.2	1606.99	1052	0.0335966	Naive	IK	Cd40lg	0	IK_CKO_Naive|WT_Naive
19_OCR_52167_lociStitched	chr17	73481805	73525381	19	10340	35375	4636.49	1053	0.0335762	Naive	IK	Lclat1	0	IK_CKO_Naive|IK_CKO_Treg|WT_Naive|WT_Treg
6_OCR_90585_lociStitched	chr5	145941520	145965557	6	3568	37358.3	6627	1054	0.0335683	Naive	IK	Zkscan5	0	IK_CKO_Naive
4_OCR_69410_lociStitched	chr2	180430001	180445742	4	3520	37803.6	7078.73	1055	0.0335613	Naive	IK	2310003C23Rik	0	IK_CKO_Naive|IK_CKO_Treg|WT_Naive|WT_Treg
2_OCR_108476_lociStitched	chr8	83535791	83539575	2	1486	34431	3707.18	1056	0.0335601	Naive	IK	Gm9725	0	IK_CKO_Naive|IK_CKO_Treg|WT_Naive|WT_Treg
6_OCR_14833_lociStitched	chr10	114749408	114770457	6	4113	36987.3	6302.07	1057	0.033518	Naive	IK	Rab21	0	IK_CKO_Naive|IK_CKO_Treg|WT_Naive|WT_Treg
9_OCR_81728_lociStitched	chr4	123229154	123266719	9	5924	34075.2	3418.41	1058	0.0334869	Naive	IK	Macf1	0	IK_CKO_Naive|IK_CKO_Treg|WT_Naive|WT_Treg
8_OCR_25085_lociStitched	chr12	83266646	83291113	8	5329	36879.1	6275.79	1059	0.0334285	Naive	IK	Sipa1l1	0	IK_CKO_Naive|IK_CKO_Treg|WT_Naive
6_OCR_117096_lociStitched	chrX	34519479	34530280	6	3369	32900.9	2304.93	1060	0.0334205	Naive	IK	2021-09-06	0	IK_CKO_Naive|WT_Naive|WT_Treg
17_OCR_98748_lociStitched	chr7	13459739	13563978	17	12769	50785.2	20191.1	1061	0.0334185	Naive	IK	Zfp446	0	IK_CKO_Naive|IK_CKO_Treg|WT_Treg
12_OCR_31185_lociStitched	chr13	85399445	85439943	12	5911	38635.1	8042.9	1062	0.0334164	Naive	IK	Rasa1	0	IK_CKO_Naive|WT_Naive
5_OCR_56466_lociStitched	chr18	73731492	73745120	5	2441	36970	6421.51	1063	0.0333687	Naive	IK	Mex3c	0	IK_CKO_Naive|IK_CKO_Treg|WT_Treg
4_OCR_103456_lociStitched	chr7	121419099	121445586	4	3833	35108.5	4616.68	1064	0.0333067	Naive	IK	Psma1	0	IK_CKO_Naive|WT_Naive
9_OCR_60972_lociStitched	chr2	24240174	24265280	9	5086	36684.9	6198.67	1065	0.0333006	Naive	IK	Psd4	0	IK_CKO_Naive|IK_CKO_Treg|WT_Treg
8_OCR_116066_lociStitched	chr9	115377696	115409122	8	4306	33424.7	2941.47	1066	0.0332973	Naive	IK	Gm5921	29996	IK_CKO_Naive
26_OCR_36684_lociStitched	chr14	75222508	75349067	26	13576	48965.7	18490.3	1067	0.0332888	Naive	IK	Lrch1	0	IK_CKO_Naive|IK_CKO_Treg|WT_Naive|WT_Treg
5_OCR_99663_lociStitched	chr7	31336627	31350499	5	3705	37823.4	7350.77	1068	0.0332858	Naive	IK	Tmem149	0	IK_CKO_Naive|IK_CKO_Treg|WT_Treg
10_OCR_86445_lociStitched	chr5	65296540	65325128	10	5308	34534.3	4102.38	1069	0.0332413	Naive	IK	Tlr1	0	IK_CKO_Naive|IK_CKO_Treg|WT_Treg
13_OCR_117676_lociStitched	chrX	93290940	93343314	13	6320	33137	2723.45	1070	0.0332213	Naive	IK	Msn	0	IK_CKO_Naive|IK_CKO_Treg|WT_Naive|WT_Treg
2_OCR_35723_lociStitched	chr14	56175947	56179940	2	1520	33686.9	3287.04	1071	0.0332063	Naive	IK	Dcaf11	0	IK_CKO_Naive|IK_CKO_Treg|WT_Naive|WT_Treg
1_OCR_30295_lociStitched	chr13	65341681	65343056	1	1376	32570	2280.44	1072	0.0330858	Naive	IK	Gm10775	17790	IK_CKO_Naive
6_OCR_69983_lociStitched	chr3	19311034	19330736	6	3985	32234.4	1952.47	1073	0.0330775	Naive	IK	Dnajc5b	77858	IK_CKO_Naive|WT_Naive|WT_Treg
8_OCR_34428_lociStitched	chr14	27457120	27495590	8	5614	39493.3	9263.58	1074	0.0330204	Naive	IK	Pde12	0	IK_CKO_Naive|IK_CKO_Treg|WT_Treg
1_OCR_87502_lociStitched	chr5	93634381	93636176	1	1796	33121.2	2923.34	1075	0.0329856	Naive	IK	2010109A12Rik	0	IK_CKO_Naive
2_OCR_82556_lociStitched	chr4	134908603	134915068	2	1518	34068.6	3941.71	1076	0.0329081	Naive	IK	Srrm1	0	IK_CKO_Naive|WT_Naive|WT_Treg
1_OCR_107901_lociStitched	chr8	72240242	72241315	1	1074	32895.7	2773.49	1077	0.032903	Naive	IK	Zfp869	5618	IK_CKO_Naive
5_OCR_49700_lociStitched	chr17	28647376	28665406	5	3504	40726.2	10632.3	1078	0.032872	Naive	IK	E230001N04Rik	0	IK_CKO_Naive|IK_CKO_Treg|WT_Naive|WT_Treg
10_OCR_42025_lociStitched	chr15	80628182	80649312	10	3999	32688.1	2618.01	1079	0.0328461	Naive	IK	Tnrc6b	38165	IK_CKO_Naive|IK_CKO_Treg|WT_Naive|WT_Treg
10_OCR_45187_lociStitched	chr16	32163212	32215631	10	5713	38994.5	8932.2	1080	0.0328376	Naive	IK	Bex6	0	IK_CKO_Naive|WT_Naive|WT_Treg
2_OCR_40637_lociStitched	chr15	58045330	58047372	2	1782	32696.5	2647.45	1081	0.0328231	Naive	IK	Gm15943	0	IK_CKO_Naive
4_OCR_39455_lociStitched	chr15	27755087	27758068	4	2251	31182.8	1166.17	1082	0.0327876	Naive	IK	Trio	90957	IK_CKO_Naive
6_OCR_115484_lociStitched	chr9	103010463	103022882	6	3715	36534.2	6526.18	1083	0.0327783	Naive	IK	Rab6b	0	IK_CKO_Naive
9_OCR_24324_lociStitched	chr12	70537779	70587499	9	6909	40452.2	10456.1	1084	0.0327652	Naive	IK	Gm9887	64333	IK_CKO_Naive|IK_CKO_Treg|WT_Naive|WT_Treg
4_OCR_67697_lociStitched	chr2	154418801	154441810	4	3201	37847.5	7889.79	1085	0.0327233	Naive	IK	Zfp341	0	IK_CKO_Naive|IK_CKO_Treg|WT_Naive
5_OCR_80590_lociStitched	chr4	101022047	101040251	5	3202	34980.8	5033.41	1086	0.0327121	Naive	IK	0610043K17Rik	0	IK_CKO_Naive
2_OCR_20207_lociStitched	chr11	98053953	98065205	2	2546	35435.9	5498.85	1087	0.0327008	Naive	IK	Cdk12	0	IK_CKO_Naive|IK_CKO_Treg|WT_Treg
8_OCR_41496_lociStitched	chr15	74785310	74805983	8	4225	37211.4	7326.51	1088	0.0326438	Naive	IK	Ly6e	0	IK_CKO_Naive|IK_CKO_Treg|WT_Naive|WT_Treg
2_OCR_104261_lociStitched	chr7	135110404	135117731	2	2403	35558.7	5711.4	1089	0.0326027	Naive	IK	Fus	0	IK_CKO_Naive
3_OCR_27219_lociStitched	chr12	119531908	119541110	3	2405	35611.7	5774.26	1090	0.032592	Naive	IK	Sp4	0	IK_CKO_Naive
7_OCR_17745_lociStitched	chr11	49508519	49541735	7	4159	35870	6041.99	1091	0.0325816	Naive	IK	Gm12192	0	IK_CKO_Naive|WT_Naive
6_OCR_63750_lociStitched	chr2	75469302	75481430	6	2982	32099.2	2379.51	1092	0.0324633	Naive	IK	Gm13655	0	IK_CKO_Naive
34_OCR_35608_lociStitched	chr14	54783610	54879570	34	15113	605172	35294.1	1	1	Treg	IK	Abhd4	0	IK_CKO_Naive|IK_CKO_Treg|WT_Naive|WT_Treg
16_OCR_83994_lociStitched	chr4	155365921	155409325	16	9398	564217	30821.2	2	0.935984	Treg	IK	Tnfrsf18	0	IK_CKO_Naive|IK_CKO_Treg|WT_Naive|WT_Treg
24_OCR_115657_lociStitched	chr9	107167126	107243240	24	15532	557938	35126.6	3	0.917411	Treg	IK	6430571L13Rik	0	IK_CKO_Naive|IK_CKO_Treg|WT_Naive|WT_Treg
34_OCR_112421_lociStitched	chr9	32500463	32574013	34	16523	508834	31060.2	4	0.838379	Treg	IK	Ets1	0	IK_CKO_Naive|IK_CKO_Treg|WT_Naive|WT_Treg
72_OCR_24606_lociStitched	chr12	74635656	74866487	72	38495	481121	49605.6	5	0.757207	Treg	IK	Prkch	0	IK_CKO_Naive|IK_CKO_Treg|WT_Naive|WT_Treg
33_OCR_111126_lociStitched	chr8	129348322	129470198	33	19919	445579	31504.9	6	0.726601	Treg	IK	SNORA14	0	IK_CKO_Naive|IK_CKO_Treg|WT_Naive|WT_Treg
47_OCR_57995_lociStitched	chr19	10783740	10920338	47	25133	452809	42126.8	7	0.720649	Treg	IK	Slc15a3	0	IK_CKO_Naive|IK_CKO_Treg|WT_Naive|WT_Treg
34_OCR_92831_lociStitched	chr6	48612963	48698052	34	19313	409414	26326.5	8	0.672228	Treg	IK	Gimap5	0	IK_CKO_Naive|IK_CKO_Treg|WT_Naive|WT_Treg
23_OCR_21439_lociStitched	chr11	117153374	117221498	23	13115	378313	38503.7	9	0.596285	Treg	IK	2021-09-09	0	IK_CKO_Naive|IK_CKO_Treg|WT_Naive|WT_Treg
35_OCR_50274_lociStitched	chr17	35293108	35412145	35	21671	391965	57435.4	10	0.58702	Treg	IK	H2-D1	0	IK_CKO_Naive|IK_CKO_Treg|WT_Naive|WT_Treg
20_OCR_73530_lociStitched	chr3	101069446	101126799	20	9029	349848	21450	11	0.57626	Treg	IK	Gm10355	0	IK_CKO_Naive|IK_CKO_Treg|WT_Naive|WT_Treg
43_OCR_102615_lociStitched	chr7	105617301	105737891	43	23112	366196	37937.6	12	0.576015	Treg	IK	A630091E08Rik	0	IK_CKO_Treg|WT_Treg
47_OCR_104507_lociStitched	chr7	139878149	140017126	47	21234	339688	45098	13	0.516935	Treg	IK	Fam53b	0	IK_CKO_Naive|IK_CKO_Treg|WT_Naive|WT_Treg
59_OCR_7840_lociStitched	chr1	182178087	182365352	59	27366	347938	56722.6	14	0.511015	Treg	IK	Itpkb	0	IK_CKO_Naive|IK_CKO_Treg|WT_Naive|WT_Treg
16_OCR_21266_lociStitched	chr11	115464599	115535802	16	8910	317259	32126.8	15	0.50034	Treg	IK	Gm11702	0	IK_CKO_Naive|IK_CKO_Treg|WT_Naive|WT_Treg
27_OCR_20315_lociStitched	chr11	98761772	98852549	27	13659	328531	51243.6	16	0.486574	Treg	IK	Gjd3	0	IK_CKO_Naive|IK_CKO_Treg|WT_Naive|WT_Treg
32_OCR_108715_lociStitched	chr8	87417344	87562458	32	19794	348099	74312.9	17	0.48043	Treg	IK	Tnpo2	0	IK_CKO_Naive|IK_CKO_Treg|WT_Naive|WT_Treg
25_OCR_19674_lociStitched	chr11	87492089	87585069	25	12687	308033	37647.6	18	0.474463	Treg	IK	Bzrap1	0	IK_CKO_Naive|IK_CKO_Treg|WT_Naive|WT_Treg
26_OCR_64583_lociStitched	chr2	93244389	93318206	26	14592	302716	33158.6	19	0.473009	Treg	IK	Gm10804	0	IK_CKO_Treg|WT_Treg
63_OCR_2480_lociStitched	chr1	69577188	69750724	63	28282	280885	15045.6	20	0.466486	Treg	IK	Ikzf2	0	IK_CKO_Treg|WT_Treg
35_OCR_9473_lociStitched	chr10	13684316	13792447	35	18729	282838	26394.8	21	0.449997	Treg	IK	Gm8330	0	IK_CKO_Naive|IK_CKO_Treg|WT_Naive|WT_Treg
48_OCR_83159_lociStitched	chr4	144783986	144957469	48	28084	285293	33239.3	22	0.442294	Treg	IK	Tnfrsf8	0	IK_CKO_Naive|IK_CKO_Treg|WT_Naive|WT_Treg
19_OCR_89268_lociStitched	chr5	123565966	123629136	19	11491	292755	42740.8	23	0.438716	Treg	IK	Hpd	0	IK_CKO_Naive|IK_CKO_Treg|WT_Naive|WT_Treg
13_OCR_49810_lociStitched	chr17	29596056	29651745	13	7534	271055	23021.8	24	0.435239	Treg	IK	Pim1	0	IK_CKO_Naive|IK_CKO_Treg|WT_Naive|WT_Treg
27_OCR_57576_lociStitched	chr19	4112946	4242821	27	18802	311323	64820.6	25	0.432554	Treg	IK	Pold4	0	IK_CKO_Naive|IK_CKO_Treg|WT_Naive|WT_Treg
35_OCR_26442_lociStitched	chr12	109146757	109247707	35	17293	290918	47587.8	26	0.426986	Treg	IK	Bcl11b	0	IK_CKO_Naive|IK_CKO_Treg|WT_Naive|WT_Treg
17_OCR_104169_lociStitched	chr7	134225706	134288508	17	10810	263385	23117.4	27	0.421613	Treg	IK	Spn	0	IK_CKO_Naive|IK_CKO_Treg|WT_Naive|WT_Treg
17_OCR_12907_lociStitched	chr10	80105884	80165560	17	9885	283586	43324.8	28	0.421602	Treg	IK	Izumo4	0	IK_CKO_Naive|IK_CKO_Treg|WT_Naive|WT_Treg
28_OCR_67940_lociStitched	chr2	158492108	158571269	28	15696	264026	27753.8	29	0.414601	Treg	IK	AL663077.1	0	IK_CKO_Naive|IK_CKO_Treg|WT_Naive|WT_Treg
16_OCR_59451_lociStitched	chr19	53464308	53518263	16	9714	257743	21684.5	30	0.414227	Treg	IK	Smndc1	0	IK_CKO_Naive|IK_CKO_Treg|WT_Naive|WT_Treg
27_OCR_101216_lociStitched	chr7	75394401	75474641	27	16385	254939	23398	31	0.406299	Treg	IK	Fam169b	0	IK_CKO_Naive|IK_CKO_Treg|WT_Naive|WT_Treg
21_OCR_57729_lociStitched	chr19	5786431	5856833	21	11060	257305	28273.4	32	0.401896	Treg	IK	Gm9783	0	IK_CKO_Naive|IK_CKO_Treg|WT_Naive|WT_Treg
14_OCR_19578_lociStitched	chr11	86381950	86410354	14	5766	238932	10580.5	33	0.400702	Treg	IK	Vmp1	0	IK_CKO_Naive|IK_CKO_Treg|WT_Naive|WT_Treg
15_OCR_61760_lociStitched	chr2	34793136	34838268	15	8669	243966	18580.8	34	0.395497	Treg	IK	Gm13450	0	IK_CKO_Naive|IK_CKO_Treg|WT_Naive|WT_Treg
45_OCR_20466_lociStitched	chr11	100665638	100845021	45	25467	278295	53868.7	35	0.393814	Treg	IK	Ptrf	0	IK_CKO_Naive|IK_CKO_Treg|WT_Naive|WT_Treg
27_OCR_6959_lociStitched	chr1	167564149	167666818	27	15825	252401	28952.7	36	0.3921	Treg	IK	Rcsd1	0	IK_CKO_Naive|IK_CKO_Treg|WT_Naive|WT_Treg
26_OCR_41345_lociStitched	chr15	72967572	73016181	26	12424	246030	24076	37	0.389476	Treg	IK	Eif2c2	0	IK_CKO_Naive|IK_CKO_Treg|WT_Naive|WT_Treg
24_OCR_41081_lociStitched	chr15	66581088	66657609	24	12154	229884	10751.2	38	0.384527	Treg	IK	Tg	0	IK_CKO_Naive|IK_CKO_Treg|WT_Naive|WT_Treg
10_OCR_115787_lociStitched	chr9	108940649	108962447	10	4972	233378	14698.4	39	0.383731	Treg	IK	Trex1	0	IK_CKO_Naive|IK_CKO_Treg|WT_Naive|WT_Treg
24_OCR_41696_lociStitched	chr15	77605859	77694425	24	12760	255008	38526.2	40	0.379874	Treg	IK	U6	0	IK_CKO_Naive|IK_CKO_Treg|WT_Naive|WT_Treg
67_OCR_77765_lociStitched	chr4	32292845	32527645	67	37541	268212	52031.7	41	0.379345	Treg	IK	Bach2	0	IK_CKO_Naive|IK_CKO_Treg|WT_Naive|WT_Treg
17_OCR_26028_lociStitched	chr12	102213907	102267963	17	9361	238030	24638.7	42	0.374451	Treg	IK	Mir1190	0	IK_CKO_Naive|IK_CKO_Treg|WT_Naive|WT_Treg
13_OCR_108660_lociStitched	chr8	86697843	86735485	13	7770	241906	28807.4	43	0.373938	Treg	IK	Mir24-2	0	IK_CKO_Naive|IK_CKO_Treg|WT_Naive|WT_Treg
18_OCR_73182_lociStitched	chr3	95428631	95497878	18	12251	240342	27601.9	44	0.373309	Treg	IK	Adamtsl4	0	IK_CKO_Naive|IK_CKO_Treg|WT_Naive|WT_Treg
40_OCR_16498_lociStitched	chr11	11546392	11689075	40	21388	236469	27666.2	45	0.366398	Treg	IK	Ikzf1	0	IK_CKO_Naive|IK_CKO_Treg|WT_Naive|WT_Treg
23_OCR_60375_lociStitched	chr2	11538190	11594873	23	12751	216478	8604.48	46	0.364769	Treg	IK	Il2ra	0	IK_CKO_Treg|WT_Naive|WT_Treg
22_OCR_17258_lociStitched	chr11	32432762	32502112	22	11822	237864	30070.2	47	0.364628	Treg	IK	Stk10	0	IK_CKO_Naive|IK_CKO_Treg|WT_Naive|WT_Treg
24_OCR_41727_lociStitched	chr15	78252886	78362930	24	15268	251484	43698.5	48	0.364613	Treg	IK	C1qtnf6	0	IK_CKO_Treg|WT_Treg
21_OCR_112827_lociStitched	chr9	43817245	43861261	21	10054	222180	14490.1	49	0.364446	Treg	IK	Thy1	0	IK_CKO_Naive|IK_CKO_Treg|WT_Naive|WT_Treg
54_OCR_2116_lociStitched	chr1	60909652	61060236	54	26485	219024	15856.5	50	0.356511	Treg	IK	Icos	0	IK_CKO_Treg|WT_Naive|WT_Treg
36_OCR_105882_lociStitched	chr8	14910933	15047583	36	21798	258323	55684.9	51	0.355582	Treg	IK	BB014433	0	IK_CKO_Naive|IK_CKO_Treg|WT_Naive|WT_Treg
39_OCR_1423_lociStitched	chr1	43501026	43620353	39	19914	221268	19235.5	52	0.354519	Treg	IK	Nck2	0	IK_CKO_Naive|IK_CKO_Treg|WT_Naive|WT_Treg
20_OCR_82110_lociStitched	chr4	129408606	129517817	20	12830	229332	27444.7	53	0.354265	Treg	IK	Ptp4a2	0	IK_CKO_Naive|IK_CKO_Treg|WT_Naive|WT_Treg
23_OCR_79234_lociStitched	chr4	63004441	63085650	23	12181	236594	34887.4	54	0.353948	Treg	IK	Whrn	0	IK_CKO_Naive|IK_CKO_Treg|WT_Naive|WT_Treg
18_OCR_99513_lociStitched	chr7	29565173	29619438	18	10778	230431	28787.6	55	0.353836	Treg	IK	Lgals4	0	IK_CKO_Naive|IK_CKO_Treg|WT_Naive|WT_Treg
41_OCR_101415_lociStitched	chr7	80648210	80799395	41	21347	233808	32988.6	56	0.35239	Treg	IK	U6	0	IK_CKO_Naive|IK_CKO_Treg|WT_Naive|WT_Treg
45_OCR_88065_lociStitched	chr5	106015645	106186827	45	22062	231729	34253.5	57	0.346523	Treg	IK	Lrrc8d	0	IK_CKO_Naive|IK_CKO_Treg|WT_Naive|WT_Treg
23_OCR_21547_lociStitched	chr11	118057949	118128359	23	12889	222939	25756	58	0.34601	Treg	IK	Usp36	0	IK_CKO_Naive|IK_CKO_Treg|WT_Naive|WT_Treg
18_OCR_83615_lociStitched	chr4	150272883	150325893	18	9796	216032	20992	59	0.342248	Treg	IK	Tnfrsf9	0	IK_CKO_Treg|WT_Treg
35_OCR_86531_lociStitched	chr5	66240277	66347641	35	18345	213150	20184.4	60	0.338608	Treg	IK	Chrna9	0	IK_CKO_Naive|IK_CKO_Treg|WT_Naive|WT_Treg
21_OCR_35949_lociStitched	chr14	61304822	61364913	21	10476	212788	21164.1	61	0.336255	Treg	IK	Spata13	0	IK_CKO_Naive|IK_CKO_Treg|WT_Naive|WT_Treg
54_OCR_10745_lociStitched	chr10	39078300	39242212	54	29132	223576	32552.9	62	0.3352	Treg	IK	Fyn	0	IK_CKO_Naive|IK_CKO_Treg|WT_Naive|WT_Treg
15_OCR_20816_lociStitched	chr11	106509539	106550168	15	7660	205384	14744.3	63	0.334527	Treg	IK	Pecam1	2492	IK_CKO_Naive|IK_CKO_Treg|WT_Naive|WT_Treg
14_OCR_26614_lociStitched	chr12	111716491	111753629	14	7377	207423	16938.6	64	0.334255	Treg	IK	Ppp2r5c	0	IK_CKO_Naive|IK_CKO_Treg|WT_Naive|WT_Treg
15_OCR_95745_lociStitched	chr6	108608138	108668107	15	10822	208464	19759.8	65	0.331132	Treg	IK	Bhlhe40	0	IK_CKO_Treg|WT_Treg
25_OCR_44008_lociStitched	chr16	10723101	10815426	25	12913	222457	34640.3	66	0.329574	Treg	IK	Gm11172	0	IK_CKO_Naive|IK_CKO_Treg|WT_Naive|WT_Treg
41_OCR_116355_lociStitched	chr9	119872130	120050361	41	25020	246440	58976.6	67	0.328954	Treg	IK	Snora62	0	IK_CKO_Naive|IK_CKO_Treg|WT_Naive|WT_Treg
34_OCR_47752_lociStitched	chr16	91433600	91561596	34	18172	226617	39704.4	68	0.327987	Treg	IK	Ifngr2	0	IK_CKO_Naive|IK_CKO_Treg|WT_Naive|WT_Treg
23_OCR_113792_lociStitched	chr9	63522286	63607217	23	12748	214001	27424.2	69	0.327397	Treg	IK	Smad3	0	IK_CKO_Naive|IK_CKO_Treg|WT_Naive|WT_Treg
35_OCR_60333_lociStitched	chr2	11057334	11160248	35	19572	201578	16383.9	70	0.324971	Treg	IK	Prkcq	0	IK_CKO_Naive|IK_CKO_Treg|WT_Naive|WT_Treg
24_OCR_112383_lociStitched	chr9	32294327	32357177	24	11878	202245	17591.7	71	0.324023	Treg	IK	Fli1	0	IK_CKO_Naive|IK_CKO_Treg|WT_Naive|WT_Treg
29_OCR_18088_lociStitched	chr11	54716075	54860422	29	16662	224200	43405.1	72	0.317252	Treg	IK	Anxa6	0	IK_CKO_Naive|IK_CKO_Treg|WT_Naive|WT_Treg
11_OCR_113730_lociStitched	chr9	62188706	62222554	11	6608	202756	22278.8	73	0.316695	Treg	IK	Anp32a	0	IK_CKO_Naive|IK_CKO_Treg|WT_Naive|WT_Treg
32_OCR_29651_lociStitched	chr13	51821259	51911845	32	17660	209906	29503.9	74	0.316563	Treg	IK	AC126547.1	0	IK_CKO_Naive|IK_CKO_Treg|WT_Naive|WT_Treg
12_OCR_36726_lociStitched	chr14	75576392	75597935	12	6226	185388	8138.95	75	0.311031	Treg	IK	Lcp1	0	IK_CKO_Naive|IK_CKO_Treg|WT_Naive|WT_Treg
23_OCR_23121_lociStitched	chr12	33788372	33875627	23	13941	196542	19684.7	76	0.310342	Treg	IK	Atxn7l1	0	IK_CKO_Treg|WT_Treg
17_OCR_82434_lociStitched	chr4	133634746	133685284	17	8273	201520	25263.9	77	0.309288	Treg	IK	Sh3bgrl3	0	IK_CKO_Naive|IK_CKO_Treg|WT_Naive|WT_Treg
31_OCR_6984_lociStitched	chr1	167693057	167800254	31	19890	206547	32159.1	78	0.30601	Treg	IK	Cd247	0	IK_CKO_Naive|IK_CKO_Treg|WT_Naive|WT_Treg
25_OCR_41752_lociStitched	chr15	78377853	78464961	25	13802	206969	32944.2	79	0.305371	Treg	IK	Cyth4	0	IK_CKO_Naive|IK_CKO_Treg|WT_Naive|WT_Treg
18_OCR_92604_lociStitched	chr6	41477250	41517626	18	8029	182944	9092.68	80	0.305067	Treg	IK	Trbv31	0	IK_CKO_Naive|IK_CKO_Treg|WT_Naive|WT_Treg
6_OCR_89239_lociStitched	chr5	123434536	123445395	6	3871	184864	11280.3	81	0.304597	Treg	IK	A930024E05Rik	0	IK_CKO_Naive|IK_CKO_Treg|WT_Naive|WT_Treg
38_OCR_97064_lociStitched	chr6	129124688	129235230	38	19254	184274	12413.9	82	0.301573	Treg	IK	Cd69	0	IK_CKO_Naive|IK_CKO_Treg|WT_Naive|WT_Treg
10_OCR_49789_lociStitched	chr17	29498348	29540388	10	4800	191105	20603.8	83	0.29919	Treg	IK	Fgd2	0	IK_CKO_Treg|WT_Treg
9_OCR_45696_lociStitched	chr16	43690087	43710627	9	5911	178184	7714.82	84	0.299134	Treg	IK	Tigit	25789	IK_CKO_Treg|WT_Naive|WT_Treg
35_OCR_96005_lociStitched	chr6	114781857	114887230	35	18579	205288	35152.4	85	0.298547	Treg	IK	Vgll4	0	IK_CKO_Naive|IK_CKO_Treg|WT_Naive|WT_Treg
15_OCR_82373_lociStitched	chr4	133129940	133189853	15	10246	203572	33832.9	86	0.297853	Treg	IK	Zdhhc18	0	IK_CKO_Naive|IK_CKO_Treg|WT_Naive|WT_Treg
47_OCR_75061_lociStitched	chr3	135236189	135396571	47	26863	198761	29205.6	87	0.29753	Treg	IK	Gm9799	0	IK_CKO_Treg|WT_Treg
21_OCR_5196_lociStitched	chr1	135942578	136017159	21	10906	197043	28959.8	88	0.294946	Treg	IK	Chit1	0	IK_CKO_Naive|IK_CKO_Treg|WT_Naive|WT_Treg
30_OCR_16883_lociStitched	chr11	22680221	22783378	30	16566	187601	20332.2	89	0.293518	Treg	IK	U6	0	IK_CKO_Naive|IK_CKO_Treg|WT_Naive|WT_Treg
21_OCR_12826_lociStitched	chr10	79560042	79642879	21	14294	237668	70411.4	90	0.293495	Treg	IK	Efna2	0	IK_CKO_Naive|IK_CKO_Treg|WT_Naive|WT_Treg
26_OCR_68456_lociStitched	chr2	166418017	166501359	26	13214	205621	38679	91	0.292944	Treg	IK	AL732357.1	0	IK_CKO_Naive|IK_CKO_Treg|WT_Naive|WT_Treg
34_OCR_46090_lociStitched	chr16	49836964	49982978	34	21047	181787	16879.2	92	0.289375	Treg	IK	Cd47	0	IK_CKO_Naive|IK_CKO_Treg|WT_Naive|WT_Treg
8_OCR_12815_lociStitched	chr10	79479192	79502816	8	5728	185300	20675.7	93	0.288876	Treg	IK	Polr2e	0	IK_CKO_Naive|IK_CKO_Treg|WT_Naive|WT_Treg
23_OCR_61306_lociStitched	chr2	29474457	29539434	23	13253	180948	17459.3	94	0.286884	Treg	IK	Rapgef1	0	IK_CKO_Naive|IK_CKO_Treg|WT_Naive|WT_Treg
21_OCR_26003_lociStitched	chr12	102075333	102151950	21	10073	185030	21575.3	95	0.286824	Treg	IK	Gm10431	0	IK_CKO_Treg|WT_Naive|WT_Treg
27_OCR_17337_lociStitched	chr11	33902110	34023441	27	13749	179582	16634.5	96	0.285934	Treg	IK	Lcp2	0	IK_CKO_Naive|IK_CKO_Treg|WT_Naive|WT_Treg
10_OCR_24766_lociStitched	chr12	77462306	77487169	10	5651	175901	13766.6	97	0.284507	Treg	IK	Zbtb1	0	IK_CKO_Naive|IK_CKO_Treg|WT_Naive|WT_Treg
21_OCR_82074_lociStitched	chr4	129217362	129302581	21	12323	191427	30943	98	0.281612	Treg	IK	Gm12965	0	IK_CKO_Naive|IK_CKO_Treg|WT_Naive|WT_Treg
61_OCR_92036_lociStitched	chr6	30982750	31190499	61	30043	204196	43731.2	99	0.281579	Treg	IK	2210408F21Rik	0	IK_CKO_Naive|IK_CKO_Treg|WT_Naive|WT_Treg
17_OCR_61444_lociStitched	chr2	30963579	31036521	17	11066	180801	20606.1	100	0.281105	Treg	IK	Gpr107	0	IK_CKO_Naive|IK_CKO_Treg|WT_Naive|WT_Treg
24_OCR_20230_lociStitched	chr11	98299780	98375262	24	12010	183942	24041	101	0.280588	Treg	IK	Ikzf3	0	IK_CKO_Naive|IK_CKO_Treg|WT_Naive|WT_Treg
9_OCR_98857_lociStitched	chr7	16948437	16991699	9	6880	174506	16097.8	102	0.277969	Treg	IK	Zc3h4	0	IK_CKO_Naive|IK_CKO_Treg|WT_Naive|WT_Treg
13_OCR_18715_lociStitched	chr11	69203933	69246110	13	7728	188780	30801.9	103	0.277214	Treg	IK	Kdm6b	0	IK_CKO_Naive|IK_CKO_Treg|WT_Naive|WT_Treg
20_OCR_106314_lociStitched	chr8	26198959	26262740	20	10203	174524	16882.8	104	0.276623	Treg	IK	Plekha2	0	IK_CKO_Naive|IK_CKO_Treg|WT_Naive|WT_Treg
13_OCR_49661_lociStitched	chr17	28313617	28370480	13	9067	188660	31081.3	105	0.276513	Treg	IK	Ppard	0	IK_CKO_Naive|IK_CKO_Treg|WT_Naive|WT_Treg
25_OCR_47845_lociStitched	chr16	92724786	92826806	25	13515	176882	19332.8	106	0.276462	Treg	IK	Runx1	0	IK_CKO_Naive|IK_CKO_Treg|WT_Naive|WT_Treg
9_OCR_51972_lociStitched	chr17	71183535	71203258	9	5880	168215	11662.2	107	0.274714	Treg	IK	RP23-85E24.1	0	IK_CKO_Naive|IK_CKO_Treg|WT_Naive|WT_Treg
38_OCR_62727_lociStitched	chr2	57938864	58052180	38	17121	165974	10708.4	108	0.272454	Treg	IK	Gm13546	0	IK_CKO_Naive|IK_CKO_Treg|WT_Naive|WT_Treg
16_OCR_12468_lociStitched	chr10	74740303	74799762	16	9589	174827	19782	109	0.272068	Treg	IK	Adora2a	0	IK_CKO_Treg|WT_Treg
33_OCR_99186_lociStitched	chr7	25149874	25267469	33	18235	208037	53717.4	110	0.270795	Treg	IK	Cadm4	0	IK_CKO_Naive|IK_CKO_Treg|WT_Naive|WT_Treg
60_OCR_38515_lociStitched	chr14	122297663	122479106	60	34843	190551	36288.6	111	0.270695	Treg	IK	Timm8a2	0	IK_CKO_Naive|IK_CKO_Treg|WT_Naive|WT_Treg
12_OCR_50157_lociStitched	chr17	34323799	34356391	12	7986	174625	20568.8	112	0.270331	Treg	IK	Gm15821	0	IK_CKO_Naive|IK_CKO_Treg|WT_Naive|WT_Treg
18_OCR_96575_lociStitched	chr6	122202279	122259308	18	10080	165281	11645.3	113	0.269595	Treg	IK	M6pr	0	IK_CKO_Treg|WT_Treg
29_OCR_45684_lociStitched	chr16	43562168	43665330	29	14100	168556	14979.1	114	0.269492	Treg	IK	Tigit	0	IK_CKO_Treg|WT_Treg
18_OCR_88505_lociStitched	chr5	112639177	112731080	18	11367	193906	41099	115	0.26814	Treg	IK	Tpst2	0	IK_CKO_Naive|IK_CKO_Treg|WT_Naive|WT_Treg
21_OCR_66054_lociStitched	chr2	127126485	127172470	21	10131	170002	17258.2	116	0.268029	Treg	IK	Astl	0	IK_CKO_Naive|IK_CKO_Treg|WT_Naive|WT_Treg
14_OCR_116775_lociStitched	chrX	7142515	7195853	14	8240	165929	13782.5	117	0.266981	Treg	IK	Cacna1f	0	IK_CKO_Naive|IK_CKO_Treg|WT_Naive|WT_Treg
7_OCR_102891_lociStitched	chr7	109384794	109416734	7	5937	168605	16755.7	118	0.266459	Treg	IK	Stim1	0	IK_CKO_Naive|IK_CKO_Treg|WT_Naive|WT_Treg
29_OCR_3130_lociStitched	chr1	82783957	82876280	29	15961	166671	15316.4	119	0.265591	Treg	IK	Agfg1	0	IK_CKO_Naive|IK_CKO_Treg|WT_Naive|WT_Treg
15_OCR_112465_lociStitched	chr9	32705019	32754331	15	8293	158528	8940.27	120	0.262491	Treg	IK	Ets1	201391	IK_CKO_Naive|IK_CKO_Treg|WT_Naive|WT_Treg
32_OCR_5535_lociStitched	chr1	140432401	140525804	32	16379	163941	14748.3	121	0.261798	Treg	IK	Nek7	0	IK_CKO_Treg|WT_Treg
18_OCR_41565_lociStitched	chr15	76020343	76077842	18	9851	183376	34683.4	122	0.26092	Treg	IK	Grina	0	IK_CKO_Treg|WT_Treg
18_OCR_95941_lociStitched	chr6	113552949	113647540	18	14103	178143	29871.8	123	0.260181	Treg	IK	Tatdn2	0	IK_CKO_Naive|IK_CKO_Treg|WT_Naive|WT_Treg
14_OCR_113956_lociStitched	chr9	66721239	66773975	14	7486	156621	10447	124	0.2565	Treg	IK	Rab8b	0	IK_CKO_Treg|WT_Naive|WT_Treg
33_OCR_74161_lociStitched	chr3	115363576	115482433	33	17404	163500	17650.3	125	0.255931	Treg	IK	Gm9889	0	IK_CKO_Naive|IK_CKO_Treg|WT_Naive|WT_Treg
38_OCR_59901_lociStitched	chr2	3620933	3728103	38	18687	165963	20180.1	126	0.255815	Treg	IK	Fam107b	0	IK_CKO_Naive|IK_CKO_Treg|WT_Naive|WT_Treg
29_OCR_101589_lociStitched	chr7	82845690	82953075	29	16431	165695	20456.8	127	0.254859	Treg	IK	AC158749.1	0	IK_CKO_Naive|IK_CKO_Treg|WT_Naive|WT_Treg
14_OCR_20833_lociStitched	chr11	106577860	106650881	14	10125	165108	20402.1	128	0.253924	Treg	IK	Ccdc45	0	IK_CKO_Naive|IK_CKO_Treg|WT_Naive|WT_Treg
30_OCR_38420_lociStitched	chr14	121659085	121779250	30	16866	177724	34126.9	129	0.251979	Treg	IK	Stk24	0	IK_CKO_Naive|IK_CKO_Treg|WT_Naive|WT_Treg
17_OCR_3631_lociStitched	chr1	92934569	92995828	17	9456	160615	18481.8	130	0.24941	Treg	IK	Lrrfip1	0	IK_CKO_Naive|IK_CKO_Treg|WT_Naive|WT_Treg
10_OCR_17381_lociStitched	chr11	34572156	34609928	10	6799	151859	9816.94	131	0.249249	Treg	IK	Dock2	0	IK_CKO_Naive|IK_CKO_Treg|WT_Naive|WT_Treg
18_OCR_82183_lociStitched	chr4	130448056	130516465	18	9303	170530	28506	132	0.249218	Treg	IK	Matn1	0	IK_CKO_Naive|IK_CKO_Treg|WT_Naive|WT_Treg
20_OCR_61541_lociStitched	chr2	31976638	32047797	20	9600	167138	25389.5	133	0.248735	Treg	IK	Prrc2b	0	IK_CKO_Naive|IK_CKO_Treg|WT_Naive|WT_Treg
8_OCR_72748_lociStitched	chr3	87937014	87968185	8	5572	159228	18880.3	134	0.246276	Treg	IK	Mef2d	0	IK_CKO_Naive|IK_CKO_Treg|WT_Naive|WT_Treg
25_OCR_15702_lociStitched	chr10	126541175	126633117	25	16483	176823	37346.8	135	0.244747	Treg	IK	F420014N23Rik	0	IK_CKO_Naive|IK_CKO_Treg|WT_Naive|WT_Treg
12_OCR_96280_lociStitched	chr6	117829041	117894244	12	9463	162740	23636.1	136	0.244095	Treg	IK	AC153918.1	0	IK_CKO_Naive|IK_CKO_Treg|WT_Naive|WT_Treg
25_OCR_18240_lociStitched	chr11	57981477	58053359	25	13155	153590	16108.8	137	0.241247	Treg	IK	Irgm2	0	IK_CKO_Naive|IK_CKO_Treg|WT_Naive|WT_Treg
18_OCR_20869_lociStitched	chr11	107268833	107341310	18	11006	157065	19742.7	138	0.240968	Treg	IK	Psmd12	0	IK_CKO_Naive|IK_CKO_Treg|WT_Naive|WT_Treg
28_OCR_44700_lociStitched	chr16	23223303	23308691	28	17364	156789	20091.8	139	0.239872	Treg	IK	St6gal1	0	IK_CKO_Naive|IK_CKO_Treg|WT_Naive|WT_Treg
12_OCR_20993_lociStitched	chr11	109263276	109307310	12	8568	150209	14976	140	0.237301	Treg	IK	Amz2	0	IK_CKO_Naive|IK_CKO_Treg|WT_Naive|WT_Treg
15_OCR_99469_lociStitched	chr7	29123139	29178567	15	9044	169754	35019.4	141	0.236427	Treg	IK	Paf1	0	IK_CKO_Naive|IK_CKO_Treg|WT_Naive|WT_Treg
19_OCR_96752_lociStitched	chr6	125165127	125236284	19	11695	156659	21930.6	142	0.236417	Treg	IK	Tuba3a	0	IK_CKO_Naive|IK_CKO_Treg|WT_Naive|WT_Treg
22_OCR_54046_lociStitched	chr18	21089900	21180646	22	15233	153424	18947.8	143	0.235974	Treg	IK	Rnf138	0	IK_CKO_Naive|IK_CKO_Treg|WT_Naive|WT_Treg
22_OCR_41920_lociStitched	chr15	79713067	79787271	22	12734	162618	28724.4	144	0.234952	Treg	IK	Cbx7	0	IK_CKO_Naive|IK_CKO_Treg|WT_Naive|WT_Treg
40_OCR_78450_lociStitched	chr4	46536280	46679618	40	24355	185723	52017.4	145	0.234622	Treg	IK	Tbc1d2	0	IK_CKO_Treg|WT_Treg
17_OCR_88609_lociStitched	chr5	114262153	114323490	17	10112	159488	26031.4	146	0.234185	Treg	IK	Coro1c	0	IK_CKO_Naive|IK_CKO_Treg|WT_Naive|WT_Treg
14_OCR_106369_lociStitched	chr8	26707350	26749599	14	8444	148480	15813.8	147	0.232797	Treg	IK	SNORA70	0	IK_CKO_Naive|IK_CKO_Treg|WT_Naive|WT_Treg
8_OCR_52806_lociStitched	chr17	84580003	84602883	8	4398	149509	17340.8	148	0.231925	Treg	IK	Zfp36l2	0	IK_CKO_Naive|IK_CKO_Treg|WT_Naive|WT_Treg
10_OCR_21216_lociStitched	chr11	115014919	115063966	10	7430	156563	24808	149	0.231199	Treg	IK	Tmem104	0	IK_CKO_Naive|IK_CKO_Treg|WT_Naive|WT_Treg
16_OCR_49543_lociStitched	chr17	26667698	26747691	16	10917	155962	24365.9	150	0.230921	Treg	IK	AC122252.1	0	IK_CKO_Treg|WT_Treg
34_OCR_110831_lociStitched	chr8	125476810	125589897	34	17408	155698	24189.3	151	0.230767	Treg	IK	Spg7	0	IK_CKO_Naive|IK_CKO_Treg|WT_Naive|WT_Treg
17_OCR_47602_lociStitched	chr16	89802447	89849941	17	7735	145056	14718.4	152	0.228712	Treg	IK	Tiam1	0	IK_CKO_Treg|WT_Treg
11_OCR_97340_lociStitched	chr6	134847410	134882856	11	8237	149277	19130.2	153	0.228377	Treg	IK	Cdkn1b	0	IK_CKO_Naive|IK_CKO_Treg|WT_Naive|WT_Treg
21_OCR_50108_lociStitched	chr17	34027338	34137783	21	16507	186796	56812.9	154	0.228089	Treg	IK	H2-K1	0	IK_CKO_Naive|IK_CKO_Treg|WT_Naive|WT_Treg
16_OCR_57909_lociStitched	chr19	8994521	9073441	16	11034	158203	28553.3	155	0.227505	Treg	IK	Ahnak	0	IK_CKO_Naive|IK_CKO_Treg|WT_Naive|WT_Treg
36_OCR_83702_lociStitched	chr4	151460453	151589096	36	22646	196245	66727.1	156	0.227273	Treg	IK	Gm13096	0	IK_CKO_Naive|IK_CKO_Treg|WT_Naive|WT_Treg
16_OCR_78082_lociStitched	chr4	40758347	40801616	16	10041	141615	12565.3	157	0.226452	Treg	IK	AL833775.2	0	IK_CKO_Naive|IK_CKO_Treg|WT_Naive|WT_Treg
10_OCR_15865_lociStitched	chr10	128168024	128187707	10	4586	140230	11219.3	158	0.226382	Treg	IK	Wibg	0	IK_CKO_Naive|IK_CKO_Treg|WT_Naive|WT_Treg
27_OCR_35079_lociStitched	chr14	41700179	41792594	27	14021	150341	21800.7	159	0.225557	Treg	IK	Tspan14	0	IK_CKO_Naive|IK_CKO_Treg|WT_Naive|WT_Treg
23_OCR_92394_lociStitched	chr6	38248337	38310799	23	10547	144250	16215.1	160	0.22467	Treg	IK	Zc3hav1	0	IK_CKO_Naive|IK_CKO_Treg|WT_Naive|WT_Treg
15_OCR_111428_lociStitched	chr9	7829568	7873430	15	7994	139929	12781.4	161	0.223113	Treg	IK	Birc3	0	IK_CKO_Naive|IK_CKO_Treg|WT_Naive|WT_Treg
24_OCR_63630_lociStitched	chr2	73257400	73334590	24	12646	143095	17213.4	162	0.220892	Treg	IK	Gm13708	0	IK_CKO_Naive|IK_CKO_Treg|WT_Naive|WT_Treg
17_OCR_41148_lociStitched	chr15	66930300	67008921	17	11452	141368	15496.2	163	0.220876	Treg	IK	St3gal1	0	IK_CKO_Treg|WT_Treg
28_OCR_109327_lociStitched	chr8	96857687	96983009	28	17211	154459	30039.7	164	0.218327	Treg	IK	9330175E14Rik	0	IK_CKO_Naive|IK_CKO_Treg|WT_Naive|WT_Treg
30_OCR_11701_lociStitched	chr10	59341650	59445532	30	18044	166492	42747.4	165	0.217142	Treg	IK	Ddit4	0	IK_CKO_Naive|IK_CKO_Treg|WT_Naive|WT_Treg
7_OCR_20627_lociStitched	chr11	103019883	103046526	7	3014	137632	14091.5	166	0.216785	Treg	IK	Fmnl1	0	IK_CKO_Naive|IK_CKO_Treg|WT_Naive|WT_Treg
42_OCR_108524_lociStitched	chr8	84254203	84391348	42	20672	132427	9065.28	167	0.216471	Treg	IK	Inpp4b	0	IK_CKO_Naive|IK_CKO_Treg|WT_Naive|WT_Treg
14_OCR_51992_lociStitched	chr17	71307297	71367280	14	8501	142796	20112.3	168	0.21528	Treg	IK	Myl12a	0	IK_CKO_Naive|IK_CKO_Treg|WT_Naive|WT_Treg
18_OCR_97720_lociStitched	chr6	140546803	140610870	18	10736	138731	16189.7	169	0.21503	Treg	IK	Aebp2	0	IK_CKO_Naive|IK_CKO_Treg|WT_Naive|WT_Treg
19_OCR_41486_lociStitched	chr15	74726742	74766017	19	7823	133790	11550.8	170	0.214501	Treg	IK	2010109I03Rik	14607	IK_CKO_Naive|IK_CKO_Treg|WT_Naive|WT_Treg
25_OCR_56942_lociStitched	chr18	80867201	80935599	25	12417	152062	30231.9	171	0.213784	Treg	IK	Nfatc1	0	IK_CKO_Naive|IK_CKO_Treg|WT_Naive|WT_Treg
13_OCR_106731_lociStitched	chr8	35860411	35888537	13	8932	137694	15998.1	172	0.213547	Treg	IK	Dusp4	0	IK_CKO_Treg|WT_Treg
20_OCR_90303_lociStitched	chr5	141041901	141095675	20	9944	151465	29914.5	173	0.213293	Treg	IK	Lfng	0	IK_CKO_Naive|IK_CKO_Treg|WT_Naive|WT_Treg
22_OCR_104193_lociStitched	chr7	134307042	134441465	22	18094	166362	44964.5	174	0.213024	Treg	IK	Itgal	0	IK_CKO_Naive|IK_CKO_Treg|WT_Naive|WT_Treg
26_OCR_59478_lociStitched	chr19	53553827	53653919	26	16560	146064	24762.8	175	0.212855	Treg	IK	Dusp5	0	IK_CKO_Naive|IK_CKO_Treg|WT_Naive|WT_Treg
25_OCR_115996_lociStitched	chr9	114324904	114419508	25	13573	145312	24540.3	176	0.211925	Treg	IK	Ccr4	0	IK_CKO_Treg|WT_Treg
39_OCR_95693_lociStitched	chr6	108358035	108523043	39	22638	145488	24734.7	177	0.211893	Treg	IK	Gm16433	0	IK_CKO_Treg|WT_Treg
43_OCR_34368_lociStitched	chr14	26262017	26434477	43	23195	186722	66569.6	178	0.21084	Treg	IK	Zmiz1	0	IK_CKO_Treg|WT_Treg
12_OCR_90658_lociStitched	chr5	147860833	147889611	12	7523	130736	10843.6	179	0.210382	Treg	IK	Polr1d	0	IK_CKO_Naive|IK_CKO_Treg|WT_Naive|WT_Treg
29_OCR_992_lociStitched	chr1	36281599	36383275	29	15597	154090	34458	180	0.209926	Treg	IK	Arid5a	0	IK_CKO_Naive|IK_CKO_Treg|WT_Naive|WT_Treg
54_OCR_46214_lociStitched	chr16	52031106	52244337	54	28930	142609	23092.9	181	0.209722	Treg	IK	Cblb	0	IK_CKO_Naive|IK_CKO_Treg|WT_Naive|WT_Treg
16_OCR_92449_lociStitched	chr6	38728941	38783190	16	6659	125744	6678.05	182	0.208932	Treg	IK	Hipk2	0	IK_CKO_Treg|WT_Treg
22_OCR_111056_lociStitched	chr8	129094921	129162294	22	9199	142413	24375.6	183	0.207128	Treg	IK	Irf2bp2	0	IK_CKO_Naive|IK_CKO_Treg|WT_Naive|WT_Treg
34_OCR_42367_lociStitched	chr15	85800173	85971364	34	19682	178689	60841.3	184	0.206795	Treg	IK	Gm15722	0	IK_CKO_Naive|IK_CKO_Treg|WT_Naive|WT_Treg
22_OCR_72922_lociStitched	chr3	89662148	89717468	22	10326	137951	20457.3	185	0.206174	Treg	IK	Il6ra	0	IK_CKO_Naive|IK_CKO_Treg|WT_Naive|WT_Treg
9_OCR_21712_lociStitched	chr11	120204621	120240598	9	5638	145797	28623.3	186	0.205612	Treg	IK	2310003H01Rik	0	IK_CKO_Naive|IK_CKO_Treg|WT_Naive|WT_Treg
9_OCR_84769_lociStitched	chr5	22938272	22979273	9	4534	129264	12259.3	187	0.205315	Treg	IK	Mll5	0	IK_CKO_Naive|IK_CKO_Treg|WT_Naive|WT_Treg
9_OCR_49915_lociStitched	chr17	31342350	31361951	9	5743	124594	8199.1	188	0.204245	Treg	IK	Ubash3a	0	IK_CKO_Naive|IK_CKO_Treg|WT_Naive|WT_Treg
21_OCR_9133_lociStitched	chr10	7529635	7576073	21	9495	125150	9849.5	189	0.202326	Treg	IK	SNORA40	0	IK_CKO_Naive|IK_CKO_Treg|WT_Naive|WT_Treg
32_OCR_38799_lociStitched	chr15	6489991	6576060	32	15418	125807	10724.2	190	0.201943	Treg	IK	Fyb	0	IK_CKO_Naive|IK_CKO_Treg|WT_Naive|WT_Treg
14_OCR_68260_lociStitched	chr2	163896084	163929534	14	6522	127906	13396.7	191	0.200937	Treg	IK	Stk4	0	IK_CKO_Naive|IK_CKO_Treg|WT_Naive|WT_Treg
12_OCR_61254_lociStitched	chr2	28362776	28403813	12	7545	136444	22344.6	192	0.200217	Treg	IK	Ralgds	0	IK_CKO_Treg|WT_Treg
19_OCR_90215_lociStitched	chr5	139800506	139874676	19	11163	155572	41498.1	193	0.200172	Treg	IK	Gpr146	0	IK_CKO_Naive|IK_CKO_Treg|WT_Naive|WT_Treg
20_OCR_36990_lociStitched	chr14	79880417	79964843	20	11889	131409	17746.3	194	0.199451	Treg	IK	Elf1	0	IK_CKO_Naive|IK_CKO_Treg|WT_Naive|WT_Treg
23_OCR_28141_lociStitched	chr13	20181968	20277658	23	14149	127440	13846.3	195	0.19933	Treg	IK	Elmo1	0	IK_CKO_Naive|IK_CKO_Treg|WT_Naive|WT_Treg
41_OCR_100964_lociStitched	chr7	71021536	71206715	41	27225	163402	50887.2	196	0.197437	Treg	IK	RP24-292K9.1	0	IK_CKO_Naive|IK_CKO_Treg|WT_Naive|WT_Treg
33_OCR_17916_lociStitched	chr11	52067537	52175288	33	18904	160991	48649.6	197	0.197132	Treg	IK	Vdac1	0	IK_CKO_Naive|IK_CKO_Treg|WT_Naive|WT_Treg
58_OCR_13039_lociStitched	chr10	80840672	81075816	58	31345	254731	142638	198	0.196697	Treg	IK	BC025920	0	IK_CKO_Naive|IK_CKO_Treg|WT_Treg
21_OCR_66143_lociStitched	chr2	128189874	128255979	21	12419	125295	13611	199	0.19598	Treg	IK	Gm14010	0	IK_CKO_Treg|WT_Treg
18_OCR_34462_lociStitched	chr14	28042291	28093967	18	8021	123764	12335.1	200	0.195531	Treg	IK	Arhgef3	0	IK_CKO_Naive|IK_CKO_Treg|WT_Naive|WT_Treg
19_OCR_117240_lociStitched	chrX	45751862	45820569	19	10799	123989	12752	201	0.195194	Treg	IK	Elf4	0	IK_CKO_Naive|IK_CKO_Treg|WT_Naive|WT_Treg
38_OCR_95051_lociStitched	chr6	94547255	94669165	38	17668	137966	27088.4	202	0.194563	Treg	IK	Lrig1	0	IK_CKO_Naive|IK_CKO_Treg|WT_Naive|WT_Treg
15_OCR_18692_lociStitched	chr11	68901549	68948328	15	9694	139621	28834.6	203	0.194404	Treg	IK	Aloxe3	0	IK_CKO_Naive|IK_CKO_Treg|WT_Naive|WT_Treg
32_OCR_105814_lociStitched	chr8	13577022	13687465	32	16779	143587	34833.7	204	0.190836	Treg	IK	Rasa3	0	IK_CKO_Naive|IK_CKO_Treg|WT_Naive|WT_Treg
14_OCR_112959_lociStitched	chr9	44788303	44831194	14	6255	118345	9633.32	205	0.190763	Treg	IK	Cd3e	0	IK_CKO_Naive|IK_CKO_Treg|WT_Naive|WT_Treg
19_OCR_6604_lociStitched	chr1	161953929	162016142	19	11455	119045	10905.9	206	0.189758	Treg	IK	Gm10529	0	IK_CKO_Naive|IK_CKO_Treg|WT_Naive|WT_Treg
18_OCR_50806_lociStitched	chr17	47638740	47706725	18	9081	127078	18988.2	207	0.189671	Treg	IK	Ccnd3	0	IK_CKO_Naive|IK_CKO_Treg|WT_Naive|WT_Treg
14_OCR_12173_lociStitched	chr10	67684478	67764233	14	13567	120869	12872.5	208	0.189508	Treg	IK	Arid5b	0	IK_CKO_Naive|IK_CKO_Treg|WT_Naive|WT_Treg
6_OCR_18837_lociStitched	chr11	70452485	70483674	6	6272	125324	19427.6	209	0.185822	Treg	IK	Spag7	0	IK_CKO_Naive|IK_CKO_Treg|WT_Naive|WT_Treg
5_OCR_105055_lociStitched	chr7	148126974	148145379	5	4142	115153	9276.12	210	0.185788	Treg	IK	Ifitm2	0	IK_CKO_Treg|WT_Treg
13_OCR_1945_lociStitched	chr1	58767904	58803983	13	7947	114125	8886.26	211	0.184669	Treg	IK	Cflar	0	IK_CKO_Naive|IK_CKO_Treg|WT_Naive|WT_Treg
18_OCR_17570_lociStitched	chr11	45865841	45905038	18	9130	114914	9873.72	212	0.18432	Treg	IK	Adam19	0	IK_CKO_Treg|WT_Treg
40_OCR_76844_lociStitched	chr4	6785467	6918905	40	22556	114930	10234.7	213	0.183716	Treg	IK	Tox	0	IK_CKO_Naive|IK_CKO_Treg|WT_Naive|WT_Treg
15_OCR_113510_lociStitched	chr9	57468252	57515280	15	7442	125842	21256.7	214	0.183523	Treg	IK	Csk	0	IK_CKO_Naive|IK_CKO_Treg|WT_Naive|WT_Treg
13_OCR_68586_lociStitched	chr2	167735228	167788307	13	8826	122851	18487.4	215	0.183134	Treg	IK	Ptpn1	0	IK_CKO_Naive|IK_CKO_Treg|WT_Naive|WT_Treg
9_OCR_19454_lociStitched	chr11	82871455	82893717	9	5708	110495	7275.22	216	0.181127	Treg	IK	Slfn2	0	IK_CKO_Naive|IK_CKO_Treg|WT_Naive|WT_Treg
13_OCR_63393_lociStitched	chr2	69917794	69968112	13	8016	109728	7054.58	217	0.180168	Treg	IK	Myo3b	0	IK_CKO_Treg|WT_Treg
14_OCR_108152_lociStitched	chr8	74842492	74890448	14	8620	123717	21196.6	218	0.179899	Treg	IK	Klf2	0	IK_CKO_Naive|IK_CKO_Treg|WT_Naive|WT_Treg
24_OCR_52797_lociStitched	chr17	84482689	84566164	24	10722	135639	33231.4	219	0.1797	Treg	IK	Zfp36l2	20312	IK_CKO_Naive|IK_CKO_Treg|WT_Naive|WT_Treg
6_OCR_21523_lociStitched	chr11	117991136	118014690	6	3041	112737	11159.9	220	0.178243	Treg	IK	Dnahc17	602	IK_CKO_Naive|IK_CKO_Treg|WT_Naive|WT_Treg
8_OCR_61438_lociStitched	chr2	30916329	30944760	8	5046	108922	8171.07	221	0.176794	Treg	IK	Fnbp1	5364	IK_CKO_Treg|WT_Treg
12_OCR_9738_lociStitched	chr10	18885392	18930238	12	7286	108124	7565.52	222	0.176456	Treg	IK	Olig3	146127	IK_CKO_Naive|IK_CKO_Treg|WT_Naive|WT_Treg
15_OCR_54759_lociStitched	chr18	38565718	38624074	15	9374	109528	9132.71	223	0.176171	Treg	IK	Ndfip1	0	IK_CKO_Naive|IK_CKO_Treg|WT_Naive|WT_Treg
17_OCR_26793_lociStitched	chr12	114082037	114117046	17	7648	117476	17143.9	224	0.176059	Treg	IK	Gpr132	0	IK_CKO_Naive|IK_CKO_Treg|WT_Naive|WT_Treg
13_OCR_2720_lociStitched	chr1	74273787	74363101	13	10143	123298	23051.9	225	0.175908	Treg	IK	Tmbim1	0	IK_CKO_Naive|IK_CKO_Treg|WT_Naive|WT_Treg
25_OCR_104046_lociStitched	chr7	132719299	132794799	25	12479	125715	25700.2	226	0.175502	Treg	IK	Il21r	0	IK_CKO_Naive|IK_CKO_Treg|WT_Naive|WT_Treg
32_OCR_17630_lociStitched	chr11	46114344	46219004	32	16273	119072	19267.9	227	0.175132	Treg	IK	Fam71b	0	IK_CKO_Naive|IK_CKO_Treg|WT_Naive|WT_Treg
10_OCR_72713_lociStitched	chr3	87635787	87664250	10	5281	108612	8960.15	228	0.174865	Treg	IK	Sh2d2a	0	IK_CKO_Naive|IK_CKO_Treg|WT_Naive|WT_Treg
23_OCR_75224_lociStitched	chr3	137436366	137543629	23	12779	116949	17408.8	229	0.174669	Treg	IK	Dnajb14	0	IK_CKO_Naive|IK_CKO_Treg|WT_Naive|WT_Treg
7_OCR_24986_lociStitched	chr12	81204448	81217053	7	4282	111247	12179	230	0.17384	Treg	IK	Zfp36l1	0	IK_CKO_Naive|IK_CKO_Treg|WT_Naive|WT_Treg
25_OCR_50126_lociStitched	chr17	34212294	34308818	25	14085	132904	34063.3	231	0.173442	Treg	IK	H2-DMb1	0	IK_CKO_Naive|IK_CKO_Treg|WT_Naive|WT_Treg
14_OCR_16818_lociStitched	chr11	21119349	21165737	14	7533	107940	9282.24	232	0.173121	Treg	IK	SNORA17	0	IK_CKO_Treg|WT_Treg
22_OCR_52125_lociStitched	chr17	73239358	73317539	22	13245	117326	18849.4	233	0.172803	Treg	IK	Lbh	0	IK_CKO_Naive|IK_CKO_Treg|WT_Naive|WT_Treg
27_OCR_20923_lociStitched	chr11	108060963	108155547	27	15035	113170	14991.6	234	0.172279	Treg	IK	Gm11655	17798	IK_CKO_Naive|IK_CKO_Treg|WT_Naive|WT_Treg
12_OCR_99279_lociStitched	chr7	25861803	25918618	12	9231	125788	27862.1	235	0.171837	Treg	IK	Pou2f2	0	IK_CKO_Treg|WT_Treg
21_OCR_104295_lociStitched	chr7	135488387	135562347	21	12252	118676	21736.8	236	0.170106	Treg	IK	Gm15503	0	IK_CKO_Naive|IK_CKO_Treg|WT_Naive|WT_Treg
18_OCR_101556_lociStitched	chr7	82701744	82758547	18	9769	104887	8014.9	237	0.169987	Treg	IK	Akap13	0	IK_CKO_Naive|IK_CKO_Treg|WT_Naive|WT_Treg
21_OCR_4956_lociStitched	chr1	132875992	132961178	21	11271	111543	14771.3	238	0.169811	Treg	IK	Il10	0	IK_CKO_Treg|WT_Treg
23_OCR_59629_lociStitched	chr19	57130011	57211045	23	14525	114485	17778.9	239	0.169696	Treg	IK	Ablim1	0	IK_CKO_Naive|IK_CKO_Treg|WT_Naive|WT_Treg
28_OCR_34484_lociStitched	chr14	28116507	28227488	28	17980	112990	16325.3	240	0.169623	Treg	IK	AC154327.1	0	IK_CKO_Naive|IK_CKO_Treg|WT_Naive|WT_Treg
21_OCR_13686_lociStitched	chr10	92605763	92670242	21	11294	110214	13792.1	241	0.169198	Treg	IK	Mir1931	0	IK_CKO_Naive|IK_CKO_Treg|WT_Naive|WT_Treg
19_OCR_25364_lociStitched	chr12	88200155	88265125	19	10079	120331	24584.6	242	0.168012	Treg	IK	Gm17422	0	IK_CKO_Naive|IK_CKO_Treg|WT_Naive|WT_Treg
12_OCR_20970_lociStitched	chr11	109222714	109247126	12	7140	106004	10819.4	243	0.167027	Treg	IK	Gna13	0	IK_CKO_Naive|IK_CKO_Treg|WT_Naive|WT_Treg
10_OCR_99350_lociStitched	chr7	26531925	26574095	10	6583	111110	15995.1	244	0.166903	Treg	IK	Axl	0	IK_CKO_Naive|IK_CKO_Treg|WT_Naive|WT_Treg
14_OCR_39913_lociStitched	chr15	36688647	36729515	14	7984	109040	13944.2	245	0.16687	Treg	IK	AC138604.1	0	IK_CKO_Naive|IK_CKO_Treg|WT_Naive|WT_Treg
15_OCR_59283_lociStitched	chr19	46574198	46603936	15	8174	114857	19766.8	246	0.166861	Treg	IK	Trim8	0	IK_CKO_Naive|IK_CKO_Treg|WT_Naive|WT_Treg
36_OCR_41973_lociStitched	chr15	80360814	80470729	36	16788	115719	20697	247	0.16674	Treg	IK	Grap2	0	IK_CKO_Naive|IK_CKO_Treg|WT_Naive|WT_Treg
32_OCR_20330_lociStitched	chr11	98953041	99068985	32	21709	125962	31107.8	248	0.166446	Treg	IK	Ccr7	0	IK_CKO_Naive|IK_CKO_Treg|WT_Naive|WT_Treg
22_OCR_52541_lociStitched	chr17	80526640	80607284	22	15030	109418	14830.4	249	0.165978	Treg	IK	Ttc39d	0	IK_CKO_Treg|WT_Treg
19_OCR_56589_lociStitched	chr18	75481608	75554762	19	11173	125898	31470.9	250	0.165697	Treg	IK	Smad7	0	IK_CKO_Naive|IK_CKO_Treg|WT_Naive|WT_Treg
20_OCR_56928_lociStitched	chr18	80793995	80852980	20	10321	115953	21576.7	251	0.165607	Treg	IK	Nfatc1	51931	IK_CKO_Treg|WT_Naive|WT_Treg
22_OCR_60250_lociStitched	chr2	9769903	9828032	22	10737	110980	17177.1	252	0.164602	Treg	IK	Gm13262	0	IK_CKO_Naive|IK_CKO_Treg|WT_Naive|WT_Treg
5_OCR_99332_lociStitched	chr7	26459271	26474989	5	4421	104380	12016.4	253	0.162076	Treg	IK	Tgfb1	0	IK_CKO_Naive|IK_CKO_Treg|WT_Naive|WT_Treg
25_OCR_89308_lociStitched	chr5	124423130	124486767	25	13356	130316	37965.8	254	0.162052	Treg	IK	Vps37b	0	IK_CKO_Naive|IK_CKO_Treg|WT_Naive|WT_Treg
34_OCR_36255_lociStitched	chr14	66794402	66901805	34	18537	108047	15874.2	255	0.161742	Treg	IK	Ptk2b	0	IK_CKO_Naive|IK_CKO_Treg|WT_Naive|WT_Treg
13_OCR_92970_lociStitched	chr6	50310874	50350782	13	6433	99291.1	7414.91	256	0.161221	Treg	IK	Osbpl3	0	IK_CKO_Treg|WT_Treg
27_OCR_57087_lociStitched	chr18	82623561	82712895	27	15557	115143	23343	257	0.161087	Treg	IK	Rpl21-ps8	0	IK_CKO_Naive|IK_CKO_Treg|WT_Naive|WT_Treg
10_OCR_18331_lociStitched	chr11	59918258	59953757	10	7090	106018	14547.5	258	0.160509	Treg	IK	Rai1	0	IK_CKO_Naive|IK_CKO_Treg|WT_Naive|WT_Treg
18_OCR_15060_lociStitched	chr10	117330238	117390709	18	12315	102595	11211.3	259	0.160357	Treg	IK	Rap1b	47246	IK_CKO_Naive|IK_CKO_Treg|WT_Naive|WT_Treg
28_OCR_60112_lociStitched	chr2	6586230	6664560	28	13996	99298.9	8036.66	260	0.160144	Treg	IK	Celf2	0	IK_CKO_Naive|IK_CKO_Treg|WT_Naive|WT_Treg
9_OCR_40768_lociStitched	chr15	59477810	59512488	9	4222	103528	12289.9	261	0.160101	Treg	IK	Trib1	0	IK_CKO_Treg|WT_Treg
16_OCR_40740_lociStitched	chr15	59338520	59373721	16	8808	96658.4	5442.07	262	0.160063	Treg	IK	Trib1	106183	IK_CKO_Treg|WT_Treg
20_OCR_16055_lociStitched	chr11	4086441	4168902	20	12600	123469	32555.6	263	0.159531	Treg	IK	Lif	0	IK_CKO_Naive|IK_CKO_Treg|WT_Naive|WT_Treg
20_OCR_9369_lociStitched	chr10	12508895	12595199	20	13214	104989	14343.7	264	0.159061	Treg	IK	U6	0	IK_CKO_Naive|IK_CKO_Treg|WT_Naive|WT_Treg
10_OCR_15760_lociStitched	chr10	127095242	127115300	10	5784	105126	15378.5	265	0.157486	Treg	IK	Tmem194	0	IK_CKO_Naive|IK_CKO_Treg|WT_Naive|WT_Treg
12_OCR_51200_lociStitched	chr17	53693468	53741160	12	8082	99127.8	9772.09	266	0.156798	Treg	IK	Gm6919	0	IK_CKO_Naive|IK_CKO_Treg|WT_Naive|WT_Treg
14_OCR_4998_lociStitched	chr1	133066447	133104348	14	5676	100885	11681.1	267	0.156531	Treg	IK	Rassf5	0	IK_CKO_Naive|IK_CKO_Treg|WT_Naive|WT_Treg
36_OCR_91471_lociStitched	chr6	15660262	15761527	36	19595	97781.5	8678.41	268	0.156355	Treg	IK	Mdfic	0	IK_CKO_Treg|WT_Treg
5_OCR_21504_lociStitched	chr11	117813339	117831525	5	4125	102682	13761.3	269	0.156034	Treg	IK	Socs3	0	IK_CKO_Naive|IK_CKO_Treg|WT_Naive|WT_Treg
29_OCR_82627_lociStitched	chr4	135608637	135763038	29	20445	138498	50025.9	270	0.155247	Treg	IK	Asap3	0	IK_CKO_Naive|IK_CKO_Treg|WT_Naive|WT_Treg
28_OCR_71732_lociStitched	chr3	60274712	60343091	28	13931	98028.1	9778.2	271	0.154858	Treg	IK	Mbnl1	0	IK_CKO_Naive|IK_CKO_Treg|WT_Naive|WT_Treg
13_OCR_59262_lociStitched	chr19	46378661	46432699	13	9494	122693	34487.1	272	0.154781	Treg	IK	Tmem180	0	IK_CKO_Naive|IK_CKO_Treg|WT_Naive|WT_Treg
19_OCR_94568_lociStitched	chr6	87452373	87502770	19	10648	97341.8	9268.01	273	0.154549	Treg	IK	Arhgap25	0	IK_CKO_Naive|IK_CKO_Treg|WT_Naive|WT_Treg
61_OCR_95290_lociStitched	chr6	99114613	99356554	61	32902	116204	28428.1	274	0.154026	Treg	IK	RP23-333F8.1	0	IK_CKO_Naive|IK_CKO_Treg|WT_Naive|WT_Treg
15_OCR_47220_lociStitched	chr16	78532201	78602610	15	11208	100016	12349.7	275	0.153833	Treg	IK	D16Ertd472e	0	IK_CKO_Naive|IK_CKO_Treg|WT_Naive|WT_Treg
15_OCR_41103_lociStitched	chr15	66674669	66709797	15	6063	91796.5	4218.87	276	0.153678	Treg	IK	Sla	11277	IK_CKO_Treg|WT_Treg
32_OCR_29359_lociStitched	chr13	45922797	46031819	32	15888	98621.3	11131.1	277	0.153524	Treg	IK	Atxn1	28506	IK_CKO_Treg|WT_Treg
17_OCR_24321_lociStitched	chr12	70452770	70524489	17	11199	105699	18324.2	278	0.153323	Treg	IK	Arf6	0	IK_CKO_Naive|IK_CKO_Treg|WT_Naive|WT_Treg
35_OCR_30197_lociStitched	chr13	63339191	63441494	35	14525	109556	22261.1	279	0.153182	Treg	IK	Gm16133	0	IK_CKO_Treg|WT_Treg
7_OCR_42962_lociStitched	chr15	97172806	97205068	7	6331	96434.3	9310.81	280	0.152881	Treg	IK	Amigo2	95087	IK_CKO_Naive|IK_CKO_Treg|WT_Naive|WT_Treg
9_OCR_18977_lociStitched	chr11	74643302	74680905	9	5666	114949	27871.3	281	0.1528	Treg	IK	Sgsm2	0	IK_CKO_Naive|IK_CKO_Treg|WT_Naive|WT_Treg
20_OCR_82025_lociStitched	chr4	128685082	128764353	20	12300	107365	20697.7	282	0.15208	Treg	IK	Rnf19b	0	IK_CKO_Treg|WT_Treg
7_OCR_63752_lociStitched	chr2	75496601	75543320	7	6861	102866	16220.8	283	0.152042	Treg	IK	E030042O20Rik	0	IK_CKO_Naive|IK_CKO_Treg|WT_Naive|WT_Treg
9_OCR_3841_lociStitched	chr1	95921901	95952895	9	5734	94246.6	7633.82	284	0.151985	Treg	IK	Pdcd1	0	IK_CKO_Treg|WT_Treg
17_OCR_45177_lociStitched	chr16	32059932	32131012	17	12112	102142	15630.5	285	0.151807	Treg	IK	Gm15729	0	IK_CKO_Naive|IK_CKO_Treg|WT_Naive|WT_Treg
19_OCR_17855_lociStitched	chr11	51614311	51697885	19	12136	116686	30228.7	286	0.151712	Treg	IK	Phf15	0	IK_CKO_Naive|IK_CKO_Treg|WT_Naive|WT_Treg
7_OCR_102627_lociStitched	chr7	105822848	105852276	7	3905	94622.8	8416.41	287	0.151272	Treg	IK	Prkrir	0	IK_CKO_Naive|IK_CKO_Treg|WT_Naive|WT_Treg
13_OCR_17991_lociStitched	chr11	53568398	53617806	13	8699	106311	20277	288	0.15097	Treg	IK	Gm11006	0	IK_CKO_Naive|IK_CKO_Treg|WT_Naive|WT_Treg
18_OCR_25335_lociStitched	chr12	88103208	88178005	18	12053	109435	23546.1	289	0.150716	Treg	IK	7SK	0	IK_CKO_Naive|IK_CKO_Treg|WT_Naive|WT_Treg
18_OCR_21355_lociStitched	chr11	116215845	116307859	18	15132	116793	31146.7	290	0.15029	Treg	IK	Fam100b	0	IK_CKO_Naive|IK_CKO_Treg|WT_Naive|WT_Treg
10_OCR_32802_lociStitched	chr13	112561335	112600193	10	9275	102585	17004.3	291	0.150174	Treg	IK	Gm15327	0	IK_CKO_Naive|IK_CKO_Treg|WT_Naive|WT_Treg
6_OCR_89382_lociStitched	chr5	124925235	124947606	6	4413	93774.8	8791.8	292	0.149125	Treg	IK	Snrnp35	0	IK_CKO_Naive|IK_CKO_Treg|WT_Naive|WT_Treg
34_OCR_71314_lociStitched	chr3	52046430	52156843	34	18674	104793	20338.1	293	0.148198	Treg	IK	Gm20402	0	IK_CKO_Naive|IK_CKO_Treg|WT_Naive|WT_Treg
9_OCR_19277_lociStitched	chr11	78930044	78966479	9	5028	96818.7	12387.9	294	0.148156	Treg	IK	Ksr1	0	IK_CKO_Treg|WT_Treg
8_OCR_82403_lociStitched	chr4	133360307	133399690	8	4784	96909.7	12523.8	295	0.148077	Treg	IK	Gm12974	0	IK_CKO_Naive|IK_CKO_Treg|WT_Naive|WT_Treg
26_OCR_75244_lociStitched	chr3	137613248	137705421	26	14890	94892.1	10526.2	296	0.148042	Treg	IK	Dapp1	0	IK_CKO_Treg|WT_Treg
7_OCR_86429_lociStitched	chr5	65194008	65211021	7	4728	96962.2	13244.6	297	0.146904	Treg	IK	Klf3	0	IK_CKO_Naive|IK_CKO_Treg|WT_Naive|WT_Treg
36_OCR_14052_lociStitched	chr10	96027907	96127304	36	18489	97866.3	14680.9	298	0.145971	Treg	IK	Btg1	0	IK_CKO_Naive|IK_CKO_Treg|WT_Naive|WT_Treg
10_OCR_81814_lociStitched	chr4	124791903	124822841	10	5074	96981.3	13888.1	299	0.145809	Treg	IK	Zc3h12a	0	IK_CKO_Treg|WT_Treg
7_OCR_3473_lociStitched	chr1	90471959	90498735	7	4692	89426.5	6426.24	300	0.145646	Treg	IK	Glrp1	65497	IK_CKO_Naive|IK_CKO_Treg|WT_Naive|WT_Treg
20_OCR_54444_lociStitched	chr18	33098080	33160808	20	11421	92109.8	9152.02	301	0.145571	Treg	IK	Camk4	0	IK_CKO_Naive|IK_CKO_Treg|WT_Naive|WT_Treg
18_OCR_55568_lociStitched	chr18	56866977	56926536	18	10623	98713.1	15872.5	302	0.145366	Treg	IK	Lmnb1	0	IK_CKO_Treg|WT_Treg
27_OCR_8720_lociStitched	chr1	194955986	195057973	27	16848	102150	19316.3	303	0.145354	Treg	IK	1600010F14Rik	0	IK_CKO_Naive|IK_CKO_Treg|WT_Naive|WT_Treg
5_OCR_109682_lociStitched	chr8	108571132	108584043	5	3347	90579.7	7821.48	304	0.145221	Treg	IK	Nfatc3	0	IK_CKO_Naive|IK_CKO_Treg|WT_Naive|WT_Treg
23_OCR_110906_lociStitched	chr8	126780739	126855334	23	9988	111378	28823.5	305	0.144863	Treg	IK	1810008B01Rik	0	IK_CKO_Naive|IK_CKO_Treg|WT_Naive|WT_Treg
4_OCR_63590_lociStitched	chr2	72799853	72819152	4	3975	92422.9	10257.4	306	0.144181	Treg	IK	1700011J10Rik	0	IK_CKO_Naive|IK_CKO_Treg|WT_Naive|WT_Treg
22_OCR_87727_lociStitched	chr5	100998395	101104327	22	14159	101207	19131.3	307	0.144024	Treg	IK	Gm15777	0	IK_CKO_Treg|WT_Treg
33_OCR_98798_lociStitched	chr7	16497478	16642868	33	16410	131142	49287.2	308	0.143635	Treg	IK	Gltscr1	0	IK_CKO_Naive|IK_CKO_Treg|WT_Naive|WT_Treg
9_OCR_90919_lociStitched	chr5	151394742	151428481	9	6809	91415.8	9561.63	309	0.143635	Treg	IK	N4bp2l1	0	IK_CKO_Naive|IK_CKO_Treg|WT_Naive|WT_Treg
11_OCR_84060_lociStitched	chr5	3494133	3517252	11	5967	86051.2	4330.19	310	0.143401	Treg	IK	Gm17590	20954	IK_CKO_Treg|WT_Treg
23_OCR_68774_lociStitched	chr2	169973002	170079551	23	16060	103768	22066.3	311	0.143367	Treg	IK	Gm17619	0	IK_CKO_Naive|IK_CKO_Treg|WT_Naive|WT_Treg
26_OCR_64114_lociStitched	chr2	83515822	83620743	26	13461	96002.7	14342.7	312	0.143294	Treg	IK	Dnmt3l-ps1	0	IK_CKO_Treg|WT_Treg
7_OCR_19959_lociStitched	chr11	95212209	95246606	7	5651	93580.5	12255.7	313	0.142706	Treg	IK	Slc35b1	0	IK_CKO_Naive|IK_CKO_Treg|WT_Naive|WT_Treg
6_OCR_50758_lociStitched	chr17	46993311	47028161	6	6216	97214.1	16142.5	314	0.142261	Treg	IK	Tbcc	0	IK_CKO_Naive|IK_CKO_Treg|WT_Naive|WT_Treg
4_OCR_61582_lociStitched	chr2	32342595	32351435	4	2472	86999.7	6033.3	315	0.142077	Treg	IK	Gm13412	29115	IK_CKO_Naive|IK_CKO_Treg|WT_Naive|WT_Treg
26_OCR_107171_lociStitched	chr8	47771890	47884932	26	13893	96662.2	15746.8	316	0.141987	Treg	IK	Irf2	0	IK_CKO_Naive|IK_CKO_Treg|WT_Naive|WT_Treg
8_OCR_13704_lociStitched	chr10	92754151	92774121	8	3913	87472.6	6612.07	317	0.141891	Treg	IK	Elk3	0	IK_CKO_Treg|WT_Naive|WT_Treg
33_OCR_1788_lociStitched	chr1	54871853	54992100	33	17949	97833	17002.9	318	0.141838	Treg	IK	Ankrd44	0	IK_CKO_Naive|IK_CKO_Treg|WT_Naive|WT_Treg
21_OCR_28411_lociStitched	chr13	24686339	24732438	21	9365	90427.8	9786.82	319	0.141506	Treg	IK	Fam65b	0	IK_CKO_Naive|IK_CKO_Treg|WT_Naive|WT_Treg
21_OCR_108012_lociStitched	chr8	73177190	73301492	21	17080	155228	74693.1	320	0.14132	Treg	IK	Pik3r2	0	IK_CKO_Naive|IK_CKO_Treg|WT_Naive|WT_Treg
28_OCR_79287_lociStitched	chr4	63484155	63567646	28	15054	87181.3	6871.31	321	0.140925	Treg	IK	Rpl17-ps4	0	IK_CKO_Treg|WT_Treg
16_OCR_106669_lociStitched	chr8	35202408	35243422	16	8691	94159.9	14162.1	322	0.140377	Treg	IK	Tmem66	0	IK_CKO_Naive|IK_CKO_Treg|WT_Naive|WT_Treg
6_OCR_108686_lociStitched	chr8	87180410	87189259	6	3399	87058.2	7128.75	323	0.140257	Treg	IK	Gm2529	0	IK_CKO_Naive|IK_CKO_Treg|WT_Naive|WT_Treg
8_OCR_20799_lociStitched	chr11	106397051	106426115	8	4128	88462.1	9050.53	324	0.139348	Treg	IK	snosnR60_Z15	0	IK_CKO_Treg|WT_Naive|WT_Treg
18_OCR_102080_lociStitched	chr7	90733210	90824635	18	11462	94103.8	14975.4	325	0.138851	Treg	IK	2310044K18Rik	0	IK_CKO_Naive|IK_CKO_Treg|WT_Naive|WT_Treg
30_OCR_99066_lociStitched	chr7	19812779	19930942	30	18532	134966	55879.3	326	0.138778	Treg	IK	Ercc1	0	IK_CKO_Naive|IK_CKO_Treg|WT_Naive|WT_Treg
14_OCR_25291_lociStitched	chr12	87001567	87053964	14	7849	91312.3	12297.6	327	0.138652	Treg	IK	Batf	0	IK_CKO_Treg|WT_Treg
29_OCR_83914_lociStitched	chr4	154494790	154610212	29	16974	129965	51016.5	328	0.138536	Treg	IK	Ski	0	IK_CKO_Naive|IK_CKO_Treg|WT_Naive|WT_Treg
14_OCR_40756_lociStitched	chr15	59386247	59432685	14	7276	86490.8	7852.67	329	0.137991	Treg	IK	Trib1	47219	IK_CKO_Treg|WT_Treg
10_OCR_100387_lociStitched	chr7	53151693	53190904	10	5041	94596.5	16072.6	330	0.137791	Treg	IK	Ccdc114	0	IK_CKO_Naive|IK_CKO_Treg|WT_Naive|WT_Treg
15_OCR_96703_lociStitched	chr6	124835126	124882142	15	9050	98808.8	20419	331	0.137555	Treg	IK	Mlf2	0	IK_CKO_Naive|IK_CKO_Treg|WT_Naive|WT_Treg
14_OCR_9715_lociStitched	chr10	18703276	18735721	14	7487	86796.9	8698.5	332	0.137044	Treg	IK	Tnfaip3	0	IK_CKO_Naive|IK_CKO_Treg|WT_Naive|WT_Treg
15_OCR_1294_lociStitched	chr1	40436988	40502011	15	7971	83548.1	5552.96	333	0.136863	Treg	IK	Il1rl1	0	IK_CKO_Treg|WT_Treg
24_OCR_47975_lociStitched	chr16	94790539	94882259	24	12269	94022.2	16078.5	334	0.136773	Treg	IK	Gm15971	0	IK_CKO_Naive|IK_CKO_Treg|WT_Naive|WT_Treg
30_OCR_9392_lociStitched	chr10	12623447	12783521	30	17231	106289	28413.1	335	0.136654	Treg	IK	Sf3b5	0	IK_CKO_Treg|WT_Treg
19_OCR_68406_lociStitched	chr2	165798383	165872021	19	10617	91001.8	13232.7	336	0.136466	Treg	IK	Ncoa3	0	IK_CKO_Naive|IK_CKO_Treg|WT_Naive|WT_Treg
30_OCR_5450_lociStitched	chr1	140020580	140089127	30	13350	82921.3	5257.55	337	0.136281	Treg	IK	Ptprc	0	IK_CKO_Naive|IK_CKO_Treg|WT_Naive|WT_Treg
10_OCR_73070_lociStitched	chr3	93351065	93386541	10	5877	83354.4	5910.3	338	0.135896	Treg	IK	S100a10	0	IK_CKO_Treg|WT_Treg
18_OCR_26120_lociStitched	chr12	103881403	103943982	18	12006	101378	24155.5	339	0.135507	Treg	IK	Mir1936	0	IK_CKO_Naive|IK_CKO_Treg|WT_Naive|WT_Treg
8_OCR_75453_lociStitched	chr3	142187815	142224382	8	5273	82838.9	5817.81	340	0.135154	Treg	IK	Gbp3	0	IK_CKO_Treg|WT_Treg
2_OCR_49527_lociStitched	chr17	26639710	26646273	2	2476	84978.4	8099.4	341	0.134904	Treg	IK	Dusp1	0	IK_CKO_Naive|IK_CKO_Treg|WT_Naive|WT_Treg
29_OCR_32142_lociStitched	chr13	102463891	102538869	29	15667	91818.1	15123.1	342	0.134582	Treg	IK	Pik3r1	0	IK_CKO_Naive|IK_CKO_Treg|WT_Naive|WT_Treg
15_OCR_81309_lociStitched	chr4	116768353	116829153	15	9466	106443	29858.9	343	0.134386	Treg	IK	Snord55	0	IK_CKO_Naive|IK_CKO_Treg|WT_Naive|WT_Treg
12_OCR_3377_lociStitched	chr1	89503570	89556833	12	7754	86621.6	10093.3	344	0.134289	Treg	IK	Inpp5d	0	IK_CKO_Treg|WT_Treg
36_OCR_79979_lociStitched	chr4	87570841	87692980	36	20010	89735.5	13520.8	345	0.133739	Treg	IK	Gm12646	0	IK_CKO_Naive|IK_CKO_Treg|WT_Naive|WT_Treg
17_OCR_85530_lociStitched	chr5	37414734	37479894	17	9652	93419.9	17664.9	346	0.132932	Treg	IK	Jakmip1	0	IK_CKO_Naive|IK_CKO_Treg|WT_Naive|WT_Treg
6_OCR_66019_lociStitched	chr2	126489131	126511418	6	3705	83594.1	8527.01	347	0.131725	Treg	IK	Gabpb1	0	IK_CKO_Naive|IK_CKO_Treg|WT_Naive|WT_Treg
15_OCR_96423_lociStitched	chr6	119987022	120044826	15	8242	88365	13422.1	348	0.131507	Treg	IK	Ninj2	0	IK_CKO_Naive|IK_CKO_Treg|WT_Naive|WT_Treg
24_OCR_67568_lociStitched	chr2	152552582	152657632	24	15758	100659	25800.3	349	0.131359	Treg	IK	Bcl2l1	0	IK_CKO_Treg|WT_Treg
11_OCR_94491_lociStitched	chr6	86519256	86565818	11	8124	87275.8	12874.4	350	0.130557	Treg	IK	AC158662.1	0	IK_CKO_Treg|WT_Treg
14_OCR_87010_lociStitched	chr5	77541410	77580499	14	7133	81524	7129.83	351	0.130544	Treg	IK	Gm15831	0	IK_CKO_Treg|WT_Treg
10_OCR_73683_lociStitched	chr3	103654577	103677106	10	6016	78405.4	4330.07	352	0.129985	Treg	IK	Gm15472	0	IK_CKO_Naive|IK_CKO_Treg|WT_Naive|WT_Treg
4_OCR_72988_lociStitched	chr3	90389556	90393724	4	2443	77498.5	3478.61	353	0.129887	Treg	IK	S100a3	10412	IK_CKO_Treg|WT_Treg
21_OCR_73495_lociStitched	chr3	100797546	100881342	21	12861	91446.6	17429.6	354	0.129882	Treg	IK	Cd101	0	IK_CKO_Naive|IK_CKO_Treg|WT_Naive|WT_Treg
39_OCR_72797_lociStitched	chr3	88244372	88468383	39	21833	147892	74058	355	0.129561	Treg	IK	Rxfp4	0	IK_CKO_Naive|IK_CKO_Treg|WT_Naive|WT_Treg
37_OCR_4215_lociStitched	chr1	108439123	108611403	37	21379	90119.7	16573.3	356	0.129056	Treg	IK	Bcl2	0	IK_CKO_Naive|IK_CKO_Treg|WT_Naive|WT_Treg
10_OCR_9774_lociStitched	chr10	19289912	19318295	10	5607	80108.2	6775.02	357	0.128682	Treg	IK	Ifngr1	0	IK_CKO_Naive|IK_CKO_Treg|WT_Naive|WT_Treg
8_OCR_70508_lociStitched	chr3	30975001	31008409	8	4902	84538.9	11499	358	0.128168	Treg	IK	Skil	0	IK_CKO_Naive|IK_CKO_Treg|WT_Naive|WT_Treg
13_OCR_79685_lociStitched	chr4	82947986	83001385	13	9554	83943.2	11005.5	359	0.127988	Treg	IK	Ttc39b	0	IK_CKO_Treg|WT_Treg
9_OCR_68644_lociStitched	chr2	168400337	168427436	9	6451	85792.7	12901.8	360	0.127906	Treg	IK	Nfatc2	0	IK_CKO_Treg|WT_Treg
24_OCR_32852_lociStitched	chr13	113166032	113240788	24	13871	83345.5	10465.8	361	0.127886	Treg	IK	Il6st	24427	IK_CKO_Naive|IK_CKO_Treg|WT_Naive|WT_Treg
20_OCR_1633_lociStitched	chr1	52155561	52234452	20	12059	88752.4	16046.4	362	0.127582	Treg	IK	Gls	0	IK_CKO_Naive|IK_CKO_Treg|WT_Naive|WT_Treg
10_OCR_20566_lociStitched	chr11	102128665	102181846	10	8674	104857	32291.5	363	0.127335	Treg	IK	Ubtf	0	IK_CKO_Naive|IK_CKO_Treg|WT_Naive|WT_Treg
27_OCR_58072_lociStitched	chr19	11540908	11619201	27	13209	78183.4	5754.54	364	0.127095	Treg	IK	Ms4a4d	0	IK_CKO_Naive|IK_CKO_Treg|WT_Naive|WT_Treg
12_OCR_50605_lociStitched	chr17	44826994	44882658	12	9890	82911.5	10904.6	365	0.126355	Treg	IK	Gm10497	0	IK_CKO_Treg|WT_Treg
5_OCR_108137_lociStitched	chr8	74684485	74714435	5	4206	82224.7	10284.8	366	0.126237	Treg	IK	Hsh2d	0	IK_CKO_Naive|IK_CKO_Treg|WT_Naive|WT_Treg
17_OCR_5481_lociStitched	chr1	140144591	140201514	17	8604	77125	5191.38	367	0.126226	Treg	IK	Atp6v1g3	0	IK_CKO_Naive|IK_CKO_Treg|WT_Naive|WT_Treg
13_OCR_97524_lociStitched	chr6	136868847	136895859	13	5506	78469.9	6580.12	368	0.126149	Treg	IK	Arhgdib	0	IK_CKO_Naive|IK_CKO_Treg|WT_Naive|WT_Treg
5_OCR_58141_lociStitched	chr19	12860501	12881090	5	3975	79146.2	7358.51	369	0.12597	Treg	IK	Lpxn	0	IK_CKO_Naive|IK_CKO_Treg|WT_Naive|WT_Treg
20_OCR_1611_lociStitched	chr1	52053545	52137206	20	11874	80005	8449.76	370	0.125562	Treg	IK	Stat4	0	IK_CKO_Naive|IK_CKO_Treg|WT_Naive|WT_Treg
14_OCR_67509_lociStitched	chr2	151784699	151855980	14	9571	96500.2	25197.8	371	0.125119	Treg	IK	Slc52a3	0	IK_CKO_Treg|WT_Treg
22_OCR_55263_lociStitched	chr18	50163412	50256744	22	14335	85044.1	13915.8	372	0.124813	Treg	IK	Tnfaip8	0	IK_CKO_Treg|WT_Treg
13_OCR_105073_lociStitched	chr7	148224373	148286124	13	9340	100419	29615.8	373	0.124244	Treg	IK	Pkp3	0	IK_CKO_Treg|WT_Treg
12_OCR_18116_lociStitched	chr11	54926830	54978559	12	7385	80614.5	9895.76	374	0.124095	Treg	IK	Slc36a3	0	IK_CKO_Naive|IK_CKO_Treg|WT_Naive|WT_Treg
11_OCR_18826_lociStitched	chr11	70393124	70436325	11	6862	87153.7	16476.9	375	0.124021	Treg	IK	4930544D05Rik	0	IK_CKO_Treg|WT_Treg
15_OCR_83474_lociStitched	chr4	149053648	149112450	15	8733	96129.5	26266.9	376	0.122592	Treg	IK	Tmem201	0	IK_CKO_Naive|IK_CKO_Treg|WT_Naive|WT_Treg
7_OCR_16161_lociStitched	chr11	5400112	5428425	7	4588	78662	8895.94	377	0.122423	Treg	IK	Xbp1	0	IK_CKO_Treg|WT_Naive|WT_Treg
13_OCR_90136_lociStitched	chr5	138182098	138229204	13	9053	95766.5	26011.9	378	0.122403	Treg	IK	Zcwpw1	0	IK_CKO_Naive|IK_CKO_Treg|WT_Naive|WT_Treg
8_OCR_35209_lociStitched	chr14	45596952	45631474	8	5474	74753.9	5167.94	379	0.122107	Treg	IK	Ptger2	0	IK_CKO_Treg|WT_Treg
22_OCR_32335_lociStitched	chr13	105364328	105437280	22	10152	80487.9	10913.6	380	0.122086	Treg	IK	2610204G07Rik	37730	IK_CKO_Treg|WT_Treg
7_OCR_68509_lociStitched	chr2	167160490	167201006	7	5414	81870.7	12458.7	381	0.121802	Treg	IK	B4galt5	0	IK_CKO_Treg|WT_Treg
7_OCR_5049_lociStitched	chr1	133874515	133907862	7	4236	82167	12845.3	382	0.121643	Treg	IK	Elk4	0	IK_CKO_Naive|IK_CKO_Treg|WT_Naive|WT_Treg
22_OCR_118373_lociStitched	chrX	156111496	156179987	22	9573	73477.1	4212.2	383	0.121544	Treg	IK	Sh3kbp1	0	IK_CKO_Naive|IK_CKO_Treg|WT_Naive|WT_Treg
10_OCR_67628_lociStitched	chr2	153144900	153177148	10	5567	78030.5	8881.1	384	0.121341	Treg	IK	Asxl1	0	IK_CKO_Naive|IK_CKO_Treg|WT_Naive|WT_Treg
11_OCR_50658_lociStitched	chr17	45685582	45734364	11	10778	96271.3	27147.2	385	0.121296	Treg	IK	Slc29a1	0	IK_CKO_Naive|IK_CKO_Treg|WT_Naive|WT_Treg
25_OCR_1234_lociStitched	chr1	39949904	40040292	25	14239	87775.8	18818.8	386	0.121003	Treg	IK	Map4k4	0	IK_CKO_Naive|IK_CKO_Treg|WT_Naive|WT_Treg
3_OCR_11760_lociStitched	chr10	59809425	59815283	3	2294	74634.4	5774.23	387	0.120833	Treg	IK	4632428N05Rik	0	IK_CKO_Naive|IK_CKO_Treg|WT_Naive|WT_Treg
10_OCR_73290_lociStitched	chr3	96351360	96384444	10	5686	77615.1	8886.36	388	0.120603	Treg	IK	Polr3gl	0	IK_CKO_Naive|IK_CKO_Treg|WT_Naive|WT_Treg
27_OCR_603_lociStitched	chr1	21234458	21335208	27	12995	78131.6	9430.2	389	0.120555	Treg	IK	Gm4956	0	IK_CKO_Treg|WT_Treg
36_OCR_80575_lociStitched	chr4	100840323	100938117	36	17158	82508.8	14121.5	390	0.120004	Treg	IK	Gm12785	0	IK_CKO_Naive|IK_CKO_Treg|WT_Naive|WT_Treg
6_OCR_73153_lociStitched	chr3	95014461	95043297	6	3929	79841.1	11534.4	391	0.119862	Treg	IK	Cdc42se1	0	IK_CKO_Naive|IK_CKO_Treg|WT_Naive|WT_Treg
16_OCR_77874_lociStitched	chr4	33329159	33382438	16	9328	81149.2	12994.7	392	0.119595	Treg	IK	Pnrc1	0	IK_CKO_Naive|IK_CKO_Treg|WT_Naive|WT_Treg
13_OCR_89148_lociStitched	chr5	122581102	122630022	13	7529	83677.7	15532.1	393	0.119579	Treg	IK	Ppp1cc	0	IK_CKO_Naive|IK_CKO_Treg|WT_Naive|WT_Treg
13_OCR_82397_lociStitched	chr4	133262408	133313720	13	7374	84669.9	16589.2	394	0.119466	Treg	IK	Arid1a	0	IK_CKO_Naive|IK_CKO_Treg|WT_Naive|WT_Treg
17_OCR_20185_lociStitched	chr11	97839180	97893079	17	9516	96134.3	28070.6	395	0.119436	Treg	IK	Rpl19	0	IK_CKO_Naive|IK_CKO_Treg|WT_Naive|WT_Treg
25_OCR_2081_lociStitched	chr1	60802687	60890911	25	11124	75113.9	7093.21	396	0.11936	Treg	IK	Gm11581	0	IK_CKO_Naive|IK_CKO_Treg|WT_Naive|WT_Treg
7_OCR_49799_lociStitched	chr17	29553072	29575634	7	3613	77383.1	9613.67	397	0.118919	Treg	IK	Fgd2	39625	IK_CKO_Naive|IK_CKO_Treg|WT_Naive|WT_Treg
18_OCR_43267_lociStitched	chr15	100531590	100592668	18	10849	90010.6	22305.7	398	0.118806	Treg	IK	Slc4a8	0	IK_CKO_Naive|IK_CKO_Treg|WT_Naive|WT_Treg
16_OCR_12633_lociStitched	chr10	76959755	77029968	16	8572	90153.5	22531.4	399	0.118661	Treg	IK	Itgb2	0	IK_CKO_Naive|IK_CKO_Treg|WT_Naive|WT_Treg
24_OCR_3319_lociStitched	chr1	88236016	88344746	24	13491	95606.3	28161.1	400	0.11835	Treg	IK	1700019O17Rik	0	IK_CKO_Naive|IK_CKO_Treg|WT_Naive|WT_Treg
23_OCR_17708_lociStitched	chr11	48864686	48922760	23	8512	73126.8	5743.52	401	0.118242	Treg	IK	Gm12188	0	IK_CKO_Naive|IK_CKO_Treg|WT_Naive|WT_Treg
7_OCR_81854_lociStitched	chr4	125763104	125791549	7	4995	77663.4	10573	402	0.117728	Treg	IK	Stk40	0	IK_CKO_Treg|WT_Treg
37_OCR_60763_lociStitched	chr2	18794216	18928013	37	21678	88493.3	21447.7	403	0.117649	Treg	IK	4930426L09Rik	0	IK_CKO_Naive|IK_CKO_Treg|WT_Naive|WT_Treg
11_OCR_50297_lociStitched	chr17	35555687	35577238	11	5555	77579.3	10575.1	404	0.117576	Treg	IK	H2-Q7	0	IK_CKO_Treg|WT_Treg
37_OCR_16815_lociStitched	chr11	20982648	21092618	37	18643	80278.1	13383.3	405	0.117384	Treg	IK	Peli1	0	IK_CKO_Naive|IK_CKO_Treg|WT_Naive|WT_Treg
8_OCR_24340_lociStitched	chr12	70602236	70646813	8	6620	75428.7	8581.07	406	0.117302	Treg	IK	AC153658.1	15510	IK_CKO_Treg|WT_Treg
13_OCR_21482_lociStitched	chr11	117621788	117672409	13	8311	95992.6	29198.2	407	0.117208	Treg	IK	Syngr2	0	IK_CKO_Naive|IK_CKO_Treg|WT_Naive|WT_Treg
7_OCR_19042_lociStitched	chr11	75343918	75355265	7	4429	75287.3	8503.44	408	0.11719	Treg	IK	Slc43a2	0	IK_CKO_Naive|IK_CKO_Treg|WT_Naive|WT_Treg
5_OCR_35727_lociStitched	chr14	56196814	56223476	5	4911	80433.9	13653.6	409	0.117184	Treg	IK	Irf9	0	IK_CKO_Naive|IK_CKO_Treg|WT_Naive|WT_Treg
11_OCR_7404_lociStitched	chr1	174385346	174459199	11	12450	89576.3	22864.9	410	0.117063	Treg	IK	Ccdc19	0	IK_CKO_Treg|WT_Treg
20_OCR_73773_lociStitched	chr3	105549522	105638202	20	11439	75475.5	8814.79	411	0.116974	Treg	IK	Rap1a	0	IK_CKO_Treg|WT_Naive|WT_Treg
9_OCR_61616_lociStitched	chr2	32567695	32583439	9	5182	78192.6	11956	412	0.116229	Treg	IK	Sh2d3c	0	IK_CKO_Naive|IK_CKO_Treg|WT_Naive|WT_Treg
14_OCR_26267_lociStitched	chr12	106228670	106271326	14	9648	82287.7	16081.3	413	0.116176	Treg	IK	Glrx5	0	IK_CKO_Treg|WT_Treg
6_OCR_113853_lociStitched	chr9	64850353	64881066	6	5273	75590.8	9582.46	414	0.115829	Treg	IK	Dpp8	0	IK_CKO_Treg|WT_Naive|WT_Treg
7_OCR_42113_lociStitched	chr15	81676104	81703244	7	4818	78863.4	12975.6	415	0.115617	Treg	IK	Aco2	0	IK_CKO_Naive|IK_CKO_Treg|WT_Naive|WT_Treg
14_OCR_4773_lociStitched	chr1	129101333	129148875	14	8499	74802.6	8947.4	416	0.11556	Treg	IK	Mgat5	0	IK_CKO_Treg|WT_Treg
18_OCR_26851_lociStitched	chr12	114335980	114431880	18	11165	115886	50059.8	417	0.115509	Treg	IK	Tmem121	0	IK_CKO_Treg|WT_Naive|WT_Treg
9_OCR_7977_lociStitched	chr1	184434326	184469861	9	5779	75337.8	9580.24	418	0.115389	Treg	IK	Capn2	0	IK_CKO_Treg|WT_Treg
20_OCR_24940_lociStitched	chr12	80701084	80817064	20	10696	75653.8	9939.49	419	0.115313	Treg	IK	Rad51l1	286089	IK_CKO_Naive|IK_CKO_Treg|WT_Naive|WT_Treg
14_OCR_46065_lociStitched	chr16	49766221	49820026	14	10448	71512.2	5907.79	420	0.11512	Treg	IK	Gm16619	0	IK_CKO_Naive|IK_CKO_Treg|WT_Naive|WT_Treg
5_OCR_30951_lociStitched	chr13	81021066	81036962	5	2394	74398	8803.2	421	0.115103	Treg	IK	Arrdc3	0	IK_CKO_Naive|IK_CKO_Treg|WT_Naive|WT_Treg
5_OCR_92862_lociStitched	chr6	48713613	48722443	5	2964	69647.5	4362.9	422	0.114559	Treg	IK	Gimap3	0	IK_CKO_Naive|IK_CKO_Treg|WT_Naive|WT_Treg
8_OCR_23992_lociStitched	chr12	56583741	56607448	8	4601	75257.9	10099.2	424	0.114338	Treg	IK	Nfkbia	0	IK_CKO_Naive|IK_CKO_Treg|WT_Naive|WT_Treg
14_OCR_111783_lociStitched	chr9	15291965	15355787	14	10921	79745.6	14666.3	425	0.114199	Treg	IK	BC017612	0	IK_CKO_Treg|WT_Treg
27_OCR_90440_lociStitched	chr5	143632570	143737121	27	13593	112204	47152.5	426	0.11415	Treg	IK	Fscn1	0	IK_CKO_Naive|IK_CKO_Treg|WT_Naive|WT_Treg
7_OCR_34403_lociStitched	chr14	26651562	26682066	7	5198	74039.3	9016.98	427	0.114099	Treg	IK	Anxa11	0	IK_CKO_Treg|WT_Treg
9_OCR_82814_lociStitched	chr4	138748207	138770782	9	5675	74427.5	9578.57	428	0.113795	Treg	IK	Capzb	0	IK_CKO_Treg|WT_Treg
12_OCR_10018_lociStitched	chr10	21992797	22026728	12	7112	71764.1	7128.9	429	0.113419	Treg	IK	H60b	0	IK_CKO_Naive|IK_CKO_Treg|WT_Naive|WT_Treg
14_OCR_112979_lociStitched	chr9	45029672	45082784	14	7114	77506.3	12885	430	0.113395	Treg	IK	RP24-166B2.4	0	IK_CKO_Treg|WT_Treg
17_OCR_116035_lociStitched	chr9	114639037	114707088	17	11080	87003.2	22388.8	431	0.113383	Treg	IK	Gm9888	0	IK_CKO_Naive|IK_CKO_Treg|WT_Naive|WT_Treg
9_OCR_16231_lociStitched	chr11	6446203	6469845	9	4881	73075.1	8541.85	432	0.11324	Treg	IK	Ccm2	0	IK_CKO_Naive|IK_CKO_Treg|WT_Naive|WT_Treg
15_OCR_108817_lociStitched	chr8	89376542	89435412	15	8568	76389.7	12174.3	433	0.112683	Treg	IK	N4bp1	0	IK_CKO_Treg|WT_Treg
12_OCR_52047_lociStitched	chr17	71794121	71845536	12	6356	76839.7	12673.8	434	0.112596	Treg	IK	Gm4707	0	IK_CKO_Naive|IK_CKO_Treg|WT_Naive|WT_Treg
19_OCR_111936_lociStitched	chr9	20935427	21000786	19	10316	94731.3	30620.7	435	0.112499	Treg	IK	Pde4a	0	IK_CKO_Treg|WT_Treg
9_OCR_23805_lociStitched	chr12	52945544	52973165	9	5650	69284.5	5416.48	436	0.112073	Treg	IK	Hectd1	15020	IK_CKO_Naive|IK_CKO_Treg|WT_Naive|WT_Treg
8_OCR_110755_lociStitched	chr8	125071670	125101023	8	6429	82188.4	18342.7	437	0.112034	Treg	IK	Aprt	0	IK_CKO_Treg|WT_Naive|WT_Treg
10_OCR_26596_lociStitched	chr12	111611657	111636944	10	4762	72485.2	8665.85	438	0.111988	Treg	IK	Ppp2r5c	48573	IK_CKO_Treg|WT_Treg
8_OCR_15848_lociStitched	chr10	128049740	128083844	8	5352	73746.5	9931.08	439	0.111981	Treg	IK	Gm17336	0	IK_CKO_Naive|IK_CKO_Treg|WT_Naive|WT_Treg
11_OCR_57706_lociStitched	chr19	5704085	5752088	11	5917	92535.4	28787.4	440	0.111863	Treg	IK	Ltbp3	0	IK_CKO_Treg|WT_Treg
9_OCR_105271_lociStitched	chr7	150810536	150835814	9	4270	68258.2	4684.01	441	0.111558	Treg	IK	Tnfrsf22	0	IK_CKO_Naive|IK_CKO_Treg|WT_Naive|WT_Treg
11_OCR_57879_lociStitched	chr19	8757413	8816601	11	7306	75695.5	12624.8	443	0.110674	Treg	IK	Stx5a	0	IK_CKO_Naive|IK_CKO_Treg|WT_Naive|WT_Treg
2_OCR_68563_lociStitched	chr2	167600383	167604146	2	2334	69235.1	6172.45	444	0.11066	Treg	IK	Gm14321	0	IK_CKO_Naive|IK_CKO_Treg|WT_Naive|WT_Treg
9_OCR_85207_lociStitched	chr5	31994280	32035731	9	7461	70901.9	7871.54	445	0.110603	Treg	IK	Bre	0	IK_CKO_Naive|IK_CKO_Treg|WT_Naive|WT_Treg
23_OCR_14194_lociStitched	chr10	98376435	98442183	23	11089	76629.3	13938.6	446	0.110007	Treg	IK	Atp2b1	0	IK_CKO_Naive|IK_CKO_Treg|WT_Naive|WT_Treg
7_OCR_101883_lociStitched	chr7	87546821	87566762	7	4051	72818.5	10156	447	0.109958	Treg	IK	Furin	0	IK_CKO_Treg|WT_Treg
7_OCR_60478_lociStitched	chr2	13494851	13519283	7	4471	68253.2	5653.56	448	0.109848	Treg	IK	Vim	0	IK_CKO_Naive|IK_CKO_Treg|WT_Naive|WT_Treg
12_OCR_54840_lociStitched	chr18	39606362	39657144	12	7800	74751.1	12202.9	449	0.109757	Treg	IK	Nr3c1	0	IK_CKO_Naive|IK_CKO_Treg|WT_Naive|WT_Treg
11_OCR_104108_lociStitched	chr7	133607504	133647406	11	6407	85382.3	22875.8	450	0.109684	Treg	IK	Atxn2l	0	IK_CKO_Naive|IK_CKO_Treg|WT_Naive|WT_Treg
13_OCR_108907_lociStitched	chr8	90790117	90830738	13	7771	77448	15001.3	451	0.109579	Treg	IK	Adcy7	0	IK_CKO_Treg|WT_Treg
18_OCR_68078_lociStitched	chr2	160526038	160589936	18	8666	76805.4	14773.2	452	0.108852	Treg	IK	Plcg1	0	IK_CKO_Naive|IK_CKO_Treg|WT_Naive|WT_Treg
10_OCR_113889_lociStitched	chr9	65371806	65405467	10	5119	71596.9	9610.22	453	0.108772	Treg	IK	Ankdd1a	6999	IK_CKO_Treg|WT_Treg
26_OCR_97225_lociStitched	chr6	133984737	134074742	26	12745	77134.3	15264.8	454	0.108566	Treg	IK	Etv6	0	IK_CKO_Treg|WT_Treg
8_OCR_59517_lociStitched	chr19	53964065	53981085	8	4829	70301.1	8681.9	455	0.108127	Treg	IK	Pdcd4	0	IK_CKO_Naive|IK_CKO_Treg|WT_Naive|WT_Treg
35_OCR_56411_lociStitched	chr18	70680300	70813041	35	20511	83799.4	22207.6	456	0.108079	Treg	IK	Mbd2	0	IK_CKO_Naive|IK_CKO_Treg|WT_Naive|WT_Treg
25_OCR_116099_lociStitched	chr9	115993271	116099425	25	17705	85337.2	23831.6	457	0.107928	Treg	IK	Tgfbr2	0	IK_CKO_Naive|IK_CKO_Treg|WT_Naive|WT_Treg
15_OCR_36901_lociStitched	chr14	78808598	78859555	15	10137	67319.3	6048.6	458	0.107516	Treg	IK	Akap11	77059	IK_CKO_Treg|WT_Treg
8_OCR_47705_lociStitched	chr16	91043909	91082194	8	5659	72837.2	11573.6	459	0.107503	Treg	IK	4932438H23Rik	0	IK_CKO_Treg|WT_Treg
24_OCR_79171_lociStitched	chr4	62268449	62358826	24	12388	90304.7	29435.8	460	0.10681	Treg	IK	Rgs3	0	IK_CKO_Treg|WT_Treg
10_OCR_97003_lociStitched	chr6	128785720	128806649	10	6263	68488.1	8187.42	461	0.105813	Treg	IK	Gm17395	0	IK_CKO_Naive|IK_CKO_Treg|WT_Naive|WT_Treg
18_OCR_68990_lociStitched	chr2	172843288	172889112	18	10436	87299.3	27008.7	462	0.105796	Treg	IK	Gm14453	0	IK_CKO_Naive|IK_CKO_Treg|WT_Naive|WT_Treg
18_OCR_28635_lociStitched	chr13	30816560	30884964	18	12185	72863.9	12593.2	463	0.105761	Treg	IK	Irf4	0	IK_CKO_Treg|WT_Treg
4_OCR_57555_lociStitched	chr19	4051888	4067140	4	4207	64695.9	4514.59	464	0.105604	Treg	IK	BC021614	0	IK_CKO_Naive|IK_CKO_Treg|WT_Naive|WT_Treg
12_OCR_52832_lociStitched	chr17	84705496	84735889	12	5959	67654.8	7513.15	465	0.105534	Treg	IK	U6	18408	IK_CKO_Naive|IK_CKO_Treg|WT_Naive|WT_Treg
8_OCR_57599_lociStitched	chr19	4282629	4310201	8	4900	75900.2	16074.5	466	0.10498	Treg	IK	Adrbk1	0	IK_CKO_Naive|IK_CKO_Treg|WT_Naive|WT_Treg
9_OCR_3322_lociStitched	chr1	88397657	88429429	9	6433	80535.7	20731.2	467	0.104943	Treg	IK	Ptma	0	IK_CKO_Naive|IK_CKO_Treg|WT_Naive|WT_Treg
37_OCR_110313_lociStitched	chr8	119771920	119943268	37	18143	112970	53237.8	468	0.104815	Treg	IK	4933407C03Rik	0	IK_CKO_Treg|WT_Treg
7_OCR_104035_lociStitched	chr7	132684391	132705208	7	2996	69408	9677.82	469	0.104812	Treg	IK	Il4ra	0	IK_CKO_Naive|IK_CKO_Treg|WT_Naive|WT_Treg
18_OCR_40952_lociStitched	chr15	63844999	63917815	18	10962	77119.4	17461.3	470	0.104686	Treg	IK	U6	0	IK_CKO_Naive|IK_CKO_Treg|WT_Naive|WT_Treg
19_OCR_94291_lociStitched	chr6	83354330	83407394	19	11185	79139.6	19564.7	471	0.10454	Treg	IK	B230319C09Rik	0	IK_CKO_Naive|IK_CKO_Treg|WT_Naive|WT_Treg
26_OCR_101844_lociStitched	chr7	87252948	87378113	26	16635	95000.2	35571.9	472	0.104283	Treg	IK	D330012F22Rik	0	IK_CKO_Naive|IK_CKO_Treg|WT_Naive|WT_Treg
13_OCR_4859_lociStitched	chr1	130482406	130520181	13	7041	68735.4	9413.53	473	0.104096	Treg	IK	Cxcr4	0	IK_CKO_Naive|IK_CKO_Treg|WT_Naive|WT_Treg
3_OCR_13912_lociStitched	chr10	94876889	94880818	3	3345	65001	5948.11	474	0.103624	Treg	IK	5730420D15Rik	0	IK_CKO_Treg|WT_Treg
14_OCR_115679_lociStitched	chr9	107416806	107490509	14	10880	98319.8	39298.4	475	0.103568	Treg	IK	Ifrd2	0	IK_CKO_Naive|IK_CKO_Treg|WT_Naive|WT_Treg
27_OCR_79034_lociStitched	chr4	59256810	59354047	27	14115	75028.1	16190	476	0.103247	Treg	IK	Susd1	0	IK_CKO_Naive|IK_CKO_Treg|WT_Naive|WT_Treg
10_OCR_61065_lociStitched	chr2	25389360	25447730	10	6425	86743.7	28233.6	477	0.102671	Treg	IK	B230208H17Rik	0	IK_CKO_Treg|WT_Treg
24_OCR_41804_lociStitched	chr15	78724800	78814480	24	11810	104136	45736.8	478	0.102477	Treg	IK	Triobp	0	IK_CKO_Treg|WT_Treg
14_OCR_58520_lociStitched	chr19	29284328	29346135	14	8846	66906.1	8517	479	0.102459	Treg	IK	Jak2	0	IK_CKO_Treg|WT_Treg
20_OCR_94069_lociStitched	chr6	72864404	72944111	20	11449	74414.5	16068.9	480	0.102383	Treg	IK	Tmsb10	0	IK_CKO_Naive|IK_CKO_Treg|WT_Naive|WT_Treg
12_OCR_42925_lociStitched	chr15	96456036	96497489	12	6819	70693.9	12348.8	481	0.102382	Treg	IK	Slc38a1	0	IK_CKO_Naive|IK_CKO_Treg|WT_Naive|WT_Treg
12_OCR_25171_lociStitched	chr12	85533665	85564101	12	6427	73947.3	15729.3	482	0.102159	Treg	IK	C130039O16Rik	0	IK_CKO_Naive|IK_CKO_Treg|WT_Naive|WT_Treg
7_OCR_52731_lociStitched	chr17	84095158	84132515	7	5347	68568.8	10493.6	483	0.101908	Treg	IK	Mta3	0	IK_CKO_Treg|WT_Treg
10_OCR_6368_lociStitched	chr1	157845465	157890499	10	4590	69037.1	10997.3	484	0.101846	Treg	IK	Tor1aip2	0	IK_CKO_Naive|IK_CKO_Treg|WT_Naive|WT_Treg
7_OCR_75036_lociStitched	chr3	135100709	135119786	7	3870	66468.1	8430.13	485	0.101843	Treg	IK	Ube2d3	0	IK_CKO_Naive|IK_CKO_Treg|WT_Naive|WT_Treg
16_OCR_16249_lociStitched	chr11	6554977	6616883	16	8143	76862.5	18838	486	0.101819	Treg	IK	Gm11980	0	IK_CKO_Naive|IK_CKO_Treg|WT_Naive|WT_Treg
12_OCR_117201_lociStitched	chrX	45477686	45507379	12	5646	62572.1	4554.91	487	0.101806	Treg	IK	Sash3	0	IK_CKO_Naive|IK_CKO_Treg|WT_Naive|WT_Treg
16_OCR_49976_lociStitched	chr17	31946169	31993429	16	8335	79708.7	21706.5	488	0.10178	Treg	IK	Sik1	0	IK_CKO_Treg|WT_Naive|WT_Treg
16_OCR_101917_lociStitched	chr7	87860036	87935023	16	7198	72422.4	14442.5	489	0.101741	Treg	IK	Iqgap1	13193	IK_CKO_Treg|WT_Treg
9_OCR_90494_lociStitched	chr5	144260231	144289633	9	5332	67851	9990.8	490	0.101531	Treg	IK	Rac1	0	IK_CKO_Treg|WT_Treg
4_OCR_67795_lociStitched	chr2	156005107	156034358	4	4054	68769.1	11062.7	491	0.101261	Treg	IK	Phf20	0	IK_CKO_Naive|IK_CKO_Treg|WT_Naive|WT_Treg
10_OCR_18783_lociStitched	chr11	69793424	69843703	10	8899	87123.5	29609.3	492	0.100924	Treg	IK	Dlg4	0	IK_CKO_Naive|IK_CKO_Treg|WT_Naive|WT_Treg
12_OCR_78242_lociStitched	chr4	43970078	43995721	12	6318	66615.4	9110.96	493	0.100907	Treg	IK	Glipr2	0	IK_CKO_Treg|WT_Treg
30_OCR_109996_lociStitched	chr8	114045485	114129171	30	14394	74288.1	16879.5	494	0.100738	Treg	IK	Znrf1	0	IK_CKO_Naive|IK_CKO_Treg|WT_Naive|WT_Treg
14_OCR_77169_lociStitched	chr4	11040959	11102992	14	8145	67783.5	10396.7	495	0.1007	Treg	IK	Trp53inp1	0	IK_CKO_Naive|IK_CKO_Treg|WT_Naive|WT_Treg
12_OCR_89244_lociStitched	chr5	123463669	123527373	12	8323	76763.3	19792.8	496	0.0999697	Treg	IK	Tmem120b	0	IK_CKO_Naive|IK_CKO_Treg|WT_Naive|WT_Treg
3_OCR_50222_lociStitched	chr17	35136709	35139813	3	2583	62617.3	5669.46	497	0.09993	Treg	IK	Vars	0	IK_CKO_Naive|IK_CKO_Treg|WT_Naive|WT_Treg
8_OCR_2314_lociStitched	chr1	64574256	64596285	8	3689	65005.4	8073.63	498	0.0999017	Treg	IK	Creb1	0	IK_CKO_Naive|IK_CKO_Treg|WT_Naive|WT_Treg
41_OCR_47055_lociStitched	chr16	76275444	76374542	41	19164	71965	15082.7	499	0.0998148	Treg	IK	Nrip1	0	IK_CKO_Naive|IK_CKO_Treg|WT_Naive|WT_Treg
11_OCR_18641_lociStitched	chr11	68244972	68267210	11	5208	64263.4	7585.38	500	0.0994564	Treg	IK	Pik3r5	0	IK_CKO_Naive|IK_CKO_Treg|WT_Naive|WT_Treg
1_OCR_94485_lociStitched	chr6	86475569	86477377	1	1809	64205.7	7586.91	501	0.0993525	Treg	IK	1600020E01Rik	0	IK_CKO_Naive|IK_CKO_Treg|WT_Naive|WT_Treg
3_OCR_41614_lociStitched	chr15	76437447	76456983	3	3926	67028	10428.3	502	0.099319	Treg	IK	Vps28	0	IK_CKO_Treg|WT_Treg
5_OCR_90199_lociStitched	chr5	139775081	139786733	5	2471	61092.6	4555.93	503	0.0992084	Treg	IK	Adap1	0	IK_CKO_Treg|WT_Treg
10_OCR_17466_lociStitched	chr11	43189663	43226589	10	5852	61415.3	4955.47	504	0.0990736	Treg	IK	Gm12148	0	IK_CKO_Treg|WT_Treg
19_OCR_17673_lociStitched	chr11	48629940	48688327	19	10505	72429.1	16050.6	505	0.0989309	Treg	IK	Irgm1	0	IK_CKO_Naive|IK_CKO_Treg|WT_Naive|WT_Treg
28_OCR_86782_lociStitched	chr5	73542028	73657206	28	15697	77353.5	21077.6	506	0.098751	Treg	IK	Gm17207	0	IK_CKO_Naive|IK_CKO_Treg|WT_Naive|WT_Treg
33_OCR_13011_lociStitched	chr10	80680101	80820971	33	20499	157634	101469	507	0.098556	Treg	IK	Mfsd12	0	IK_CKO_Naive|IK_CKO_Treg|WT_Naive
6_OCR_41499_lociStitched	chr15	74818754	74832292	6	3648	59958.4	3961.22	508	0.0982618	Treg	IK	Ly6a	0	IK_CKO_Naive|IK_CKO_Treg|WT_Treg
10_OCR_44740_lociStitched	chr16	23982212	23998419	10	5117	64056.5	8131.05	509	0.098136	Treg	IK	Bcl6	0	IK_CKO_Naive|IK_CKO_Treg|WT_Naive|WT_Treg
20_OCR_13970_lociStitched	chr10	95342619	95436236	20	13133	67301.3	11449.4	510	0.0980068	Treg	IK	Eea1	0	IK_CKO_Treg|WT_Treg
6_OCR_64399_lociStitched	chr2	91022126	91043395	6	3882	64566.3	8807.49	511	0.0978435	Treg	IK	Acp2	0	IK_CKO_Naive|IK_CKO_Treg|WT_Naive|WT_Treg
9_OCR_41892_lociStitched	chr15	79553517	79583904	9	5157	70476.6	14719.5	512	0.0978405	Treg	IK	Gm16576	0	IK_CKO_Naive|IK_CKO_Treg|WT_Naive|WT_Treg
17_OCR_108602_lociStitched	chr8	86238717	86323453	17	11075	82287.1	26632.5	513	0.0976606	Treg	IK	7SK	0	IK_CKO_Naive|IK_CKO_Treg|WT_Naive|WT_Treg
10_OCR_109638_lociStitched	chr8	108120182	108162743	10	7743	75345.7	19744	514	0.0975678	Treg	IK	Ctcf	0	IK_CKO_Naive|IK_CKO_Treg|WT_Naive|WT_Treg
17_OCR_22666_lociStitched	chr12	25874050	25953557	17	10904	70435.3	14844	515	0.0975495	Treg	IK	Id2	93092	IK_CKO_Treg|WT_Treg
5_OCR_108640_lociStitched	chr8	86565958	86598023	5	3826	69087.2	13515.4	516	0.0975154	Treg	IK	Rfx1	0	IK_CKO_Naive|IK_CKO_Treg|WT_Naive|WT_Treg
8_OCR_86135_lociStitched	chr5	53979716	54000468	8	4340	62650.3	7176.04	517	0.0973441	Treg	IK	Rbpj	0	IK_CKO_Treg|WT_Treg
17_OCR_48484_lociStitched	chr17	6936234	6999237	17	9024	77348.8	21912.4	518	0.0972776	Treg	IK	Ezr	0	IK_CKO_Naive|IK_CKO_Treg|WT_Naive|WT_Treg
10_OCR_114035_lociStitched	chr9	69137113	69168508	10	6984	62240.6	6840.97	519	0.0972132	Treg	IK	Rora	0	IK_CKO_Treg|WT_Treg
26_OCR_39422_lociStitched	chr15	27493828	27611772	26	16247	81310.6	25959.5	520	0.0971281	Treg	IK	Fam105a	0	IK_CKO_Naive|IK_CKO_Treg|WT_Naive|WT_Treg
17_OCR_20075_lociStitched	chr11	96824926	96921849	17	12069	96787.3	41473.4	521	0.0970629	Treg	IK	Osbpl7	0	IK_CKO_Naive|IK_CKO_Treg|WT_Naive|WT_Treg
13_OCR_58640_lociStitched	chr19	32309263	32350565	13	6598	60974.1	5683.16	522	0.0970226	Treg	IK	Sgms1	0	IK_CKO_Naive|IK_CKO_Treg|WT_Naive|WT_Treg
16_OCR_51078_lociStitched	chr17	51916979	51973711	16	11951	72548.9	17371.3	523	0.0968235	Treg	IK	Satb1	0	IK_CKO_Naive|IK_CKO_Treg|WT_Naive|WT_Treg
8_OCR_113676_lociStitched	chr9	61511818	61530556	8	4554	61183.3	6022.39	524	0.0967943	Treg	IK	Rplp1	231788	IK_CKO_Naive|IK_CKO_Treg|WT_Naive|WT_Treg
7_OCR_115169_lociStitched	chr9	96596323	96621213	7	5606	62503.8	7350.02	525	0.0967817	Treg	IK	Zbtb38	0	IK_CKO_Naive|IK_CKO_Treg|WT_Naive|WT_Treg
10_OCR_87941_lociStitched	chr5	104170588	104221120	10	7255	66929.6	11779	526	0.0967763	Treg	IK	Aff1	0	IK_CKO_Naive|IK_CKO_Treg|WT_Naive|WT_Treg
4_OCR_42970_lociStitched	chr15	97280184	97300733	4	3625	62643.6	7562.03	527	0.0966551	Treg	IK	Amigo2	202465	IK_CKO_Naive|IK_CKO_Treg|WT_Naive|WT_Treg
11_OCR_90727_lociStitched	chr5	149172736	149212053	11	7188	67762.8	12797.7	528	0.0964508	Treg	IK	Slc7a1	0	IK_CKO_Treg|WT_Treg
11_OCR_66376_lociStitched	chr2	132066286	132118336	11	8617	67956.5	13033.3	529	0.0963771	Treg	IK	Cds2	0	IK_CKO_Naive|IK_CKO_Treg|WT_Naive|WT_Treg
3_OCR_36760_lociStitched	chr14	76228136	76245832	3	4187	63279.1	8483.46	530	0.0961534	Treg	IK	Tpt1	0	IK_CKO_Naive|IK_CKO_Treg|WT_Naive|WT_Treg
7_OCR_26657_lociStitched	chr12	112375370	112405497	7	3865	66897	12108	531	0.0961416	Treg	IK	Traf3	0	IK_CKO_Treg|WT_Treg
6_OCR_50386_lociStitched	chr17	36157083	36180376	6	4529	60235.7	5532.09	532	0.0959919	Treg	IK	Gm6034	0	IK_CKO_Naive|IK_CKO_Treg|WT_Naive|WT_Treg
16_OCR_99734_lociStitched	chr7	31911523	31962768	16	8265	74740.8	20108.5	533	0.0958667	Treg	IK	G630030J09Rik	0	IK_CKO_Naive|IK_CKO_Treg|WT_Naive|WT_Treg
19_OCR_13584_lociStitched	chr10	90601015	90670401	19	10077	68740.7	14175.6	534	0.0957489	Treg	IK	Tmpo	0	IK_CKO_Naive|IK_CKO_Treg|WT_Naive|WT_Treg
2_OCR_112913_lociStitched	chr9	44411427	44413899	2	2399	60370.7	5955.3	535	0.0954861	Treg	IK	Ddx6	0	IK_CKO_Naive|IK_CKO_Treg|WT_Naive|WT_Treg
9_OCR_24324_lociStitched	chr12	70537779	70587499	9	6909	64685.7	10456.1	536	0.0951601	Treg	IK	Gm9887	64333	IK_CKO_Naive|IK_CKO_Treg|WT_Naive|WT_Treg
17_OCR_103216_lociStitched	chr7	117364626	117430828	17	10448	67618.7	13578	537	0.0948286	Treg	IK	AC124472.1	0	IK_CKO_Treg|WT_Treg
10_OCR_84760_lociStitched	chr5	22892291	22924965	10	4446	61296.4	7338.58	538	0.0946832	Treg	IK	5031425E22Rik	14771	IK_CKO_Naive|IK_CKO_Treg|WT_Naive|WT_Treg
10_OCR_77009_lociStitched	chr4	8825216	8863460	10	6097	63901.9	9985.51	539	0.0946105	Treg	IK	Rps18-ps2	4945	IK_CKO_Treg|WT_Treg
15_OCR_936_lociStitched	chr1	34858335	34924440	15	9240	73343.5	19501	540	0.0944808	Treg	IK	Plekhb2	0	IK_CKO_Naive|IK_CKO_Treg|WT_Naive|WT_Treg
9_OCR_50232_lociStitched	chr17	35183285	35205909	9	4960	65415	11635.5	541	0.0943703	Treg	IK	Ly6g6c	0	IK_CKO_Treg|WT_Treg
12_OCR_104092_lociStitched	chr7	133467324	133521738	12	7587	69802.3	16063	542	0.0942997	Treg	IK	Spns1	0	IK_CKO_Naive|IK_CKO_Treg|WT_Naive|WT_Treg
21_OCR_65559_lociStitched	chr2	117125398	117201495	21	13502	62894.2	9238.18	543	0.0941535	Treg	IK	Rasgrp1	0	IK_CKO_Naive|IK_CKO_Treg|WT_Naive|WT_Treg
28_OCR_72843_lociStitched	chr3	88936140	89055772	28	15654	108135	54671.8	544	0.0938158	Treg	IK	Krtcap2	0	IK_CKO_Naive|IK_CKO_Treg|WT_Naive|WT_Treg
8_OCR_3504_lociStitched	chr1	90596041	90617810	8	4248	62557.6	9112.5	545	0.0937834	Treg	IK	Arl4c	0	IK_CKO_Naive|IK_CKO_Treg|WT_Naive|WT_Treg
5_OCR_49243_lociStitched	chr17	21600279	21612125	5	3588	56557.5	3212.64	546	0.0936076	Treg	IK	Zfp51	12962	IK_CKO_Naive|IK_CKO_Treg|WT_Naive|WT_Treg
22_OCR_110481_lociStitched	chr8	122301843	122371812	22	11776	79225.9	26007.5	547	0.0933857	Treg	IK	Cotl1	0	IK_CKO_Naive|IK_CKO_Treg|WT_Naive|WT_Treg
17_OCR_95601_lociStitched	chr6	106670858	106755376	17	9446	62247.5	9077.23	548	0.0933012	Treg	IK	Crbn	0	IK_CKO_Naive|IK_CKO_Treg|WT_Naive|WT_Treg
24_OCR_76188_lociStitched	chr3	152540841	152645311	24	15355	68302.5	15189.9	549	0.0931999	Treg	IK	St6galnac5	0	IK_CKO_Naive|IK_CKO_Treg|WT_Naive|WT_Treg
47_OCR_41013_lociStitched	chr15	63987342	64145086	47	23542	72104.8	18992.4	550	0.0931997	Treg	IK	Asap1	0	IK_CKO_Naive|IK_CKO_Treg|WT_Naive|WT_Treg
9_OCR_58436_lociStitched	chr19	25126493	25153100	9	3943	57074.7	4054.91	551	0.0930371	Treg	IK	Dock8	52473	IK_CKO_Treg|WT_Treg
2_OCR_88320_lociStitched	chr5	109977327	109988184	2	3290	67610.9	14628.7	552	0.0929711	Treg	IK	Crlf2	0	IK_CKO_Naive|IK_CKO_Treg|WT_Naive|WT_Treg
8_OCR_41496_lociStitched	chr15	74785310	74805983	8	4225	60299	7326.51	553	0.0929542	Treg	IK	Ly6e	0	IK_CKO_Naive|IK_CKO_Treg|WT_Naive|WT_Treg
22_OCR_46355_lociStitched	chr16	55722872	55822858	22	12608	65360.8	12508.2	554	0.0927438	Treg	IK	Nfkbiz	0	IK_CKO_Treg|WT_Treg
6_OCR_50819_lociStitched	chr17	47730081	47751245	6	4068	63642.3	10810.6	555	0.0927071	Treg	IK	Med20	0	IK_CKO_Naive|IK_CKO_Treg|WT_Naive|WT_Treg
6_OCR_102829_lociStitched	chr7	108598865	108636141	6	4954	67488.2	14690.5	556	0.0926475	Treg	IK	Mir139	0	IK_CKO_Naive|IK_CKO_Treg|WT_Naive|WT_Treg
21_OCR_58629_lociStitched	chr19	32181770	32291519	21	10262	66584.7	13883.2	557	0.0924786	Treg	IK	Sgms1	0	IK_CKO_Naive|IK_CKO_Treg|WT_Naive|WT_Treg
18_OCR_6191_lociStitched	chr1	155128639	155194573	18	9378	63534	10839.5	558	0.0924663	Treg	IK	Gm8818	0	IK_CKO_Treg|WT_Treg
9_OCR_11921_lociStitched	chr10	61939936	61971005	9	5803	59621.4	6962.56	559	0.0924038	Treg	IK	Srgn	0	IK_CKO_Naive|IK_CKO_Treg|WT_Naive|WT_Treg
19_OCR_6303_lociStitched	chr1	156873012	156969942	19	13962	76778.3	24125.9	560	0.0923924	Treg	IK	Ier5	0	IK_CKO_Naive|IK_CKO_Treg|WT_Naive|WT_Treg
9_OCR_40593_lociStitched	chr15	57508779	57538035	9	5460	62555.2	9938.26	561	0.0923302	Treg	IK	Zhx2	0	IK_CKO_Naive|IK_CKO_Treg|WT_Naive|WT_Treg
5_OCR_20994_lociStitched	chr11	109331602	109341988	5	3002	59241.7	6707.28	562	0.0921855	Treg	IK	Arsg	0	IK_CKO_Treg|WT_Treg
11_OCR_96362_lociStitched	chr6	119317405	119367729	11	7235	60464.3	7946.16	563	0.0921568	Treg	IK	Adipor2	0	IK_CKO_Treg|WT_Treg
9_OCR_89444_lociStitched	chr5	125848954	125892623	9	6284	64018.8	11546.1	564	0.0920771	Treg	IK	Gm10382	0	IK_CKO_Naive|IK_CKO_Treg|WT_Naive|WT_Treg
6_OCR_104217_lociStitched	chr7	134613902	134642232	6	3933	66374.4	13952.5	565	0.0919879	Treg	IK	Fbrs	0	IK_CKO_Naive|IK_CKO_Treg|WT_Naive|WT_Treg
12_OCR_49737_lociStitched	chr17	29124735	29186381	12	5864	66442.1	14079.9	566	0.0918831	Treg	IK	Srsf3	0	IK_CKO_Naive|IK_CKO_Treg|WT_Naive|WT_Treg
2_OCR_94606_lociStitched	chr6	87788228	87801617	2	2338	60124.6	7765.62	567	0.0918777	Treg	IK	Cnbp	0	IK_CKO_Naive|IK_CKO_Treg|WT_Naive|WT_Treg
5_OCR_12809_lociStitched	chr10	79446746	79460236	5	3301	64258.3	11956.2	568	0.0917777	Treg	IK	Abca7	0	IK_CKO_Naive|IK_CKO_Treg|WT_Naive|WT_Treg
23_OCR_59187_lociStitched	chr19	45080051	45156989	23	13175	91294.6	39038.3	569	0.0916974	Treg	IK	Kazald1	0	IK_CKO_Naive|IK_CKO_Treg|WT_Naive|WT_Treg
8_OCR_50362_lociStitched	chr17	35997910	36017377	8	4590	64363.7	12184.4	570	0.0915624	Treg	IK	Dhx16	0	IK_CKO_Treg|WT_Naive|WT_Treg
11_OCR_29409_lociStitched	chr13	46808838	46838161	11	5846	59294	7283.83	571	0.0912656	Treg	IK	Nup153	0	IK_CKO_Naive|IK_CKO_Treg|WT_Naive|WT_Treg
16_OCR_99142_lociStitched	chr7	20495916	20542775	16	9196	66984.9	15069.9	572	0.0910987	Treg	IK	Rpl7a-ps8	0	IK_CKO_Naive|IK_CKO_Treg|WT_Naive|WT_Treg
5_OCR_69115_lociStitched	chr2	174424089	174440660	5	3808	56734.1	4865.25	573	0.0910176	Treg	IK	Vmn1r-ps1	7357	IK_CKO_Naive|IK_CKO_Treg|WT_Naive|WT_Treg
11_OCR_21506_lociStitched	chr11	117847667	117896963	11	5362	74353.2	22493.8	574	0.0910009	Treg	IK	Pgs1	0	IK_CKO_Treg|WT_Treg
15_OCR_14022_lociStitched	chr10	95787537	95837692	15	8733	57091.4	5401.69	575	0.0907032	Treg	IK	AC131596.1	160571	IK_CKO_Naive|IK_CKO_Treg|WT_Naive|WT_Treg
8_OCR_49372_lociStitched	chr17	24263438	24319011	8	7038	70138.7	18561.4	576	0.0905059	Treg	IK	Atp6v0c	0	IK_CKO_Naive|IK_CKO_Treg|WT_Naive|WT_Treg
17_OCR_82559_lociStitched	chr4	134938322	134996423	17	9241	71080.8	19510.3	577	0.0904939	Treg	IK	Gm15979	0	IK_CKO_Naive|IK_CKO_Treg|WT_Naive|WT_Treg
14_OCR_43383_lociStitched	chr15	102033481	102094060	14	10870	79734.1	28369.1	578	0.0901333	Treg	IK	Rarg	0	IK_CKO_Naive|IK_CKO_Treg|WT_Naive|WT_Treg
4_OCR_15716_lociStitched	chr10	126725415	126729302	4	3213	58062.5	6733.06	579	0.0900709	Treg	IK	Ddit3	0	IK_CKO_Naive|IK_CKO_Treg|WT_Naive|WT_Treg
3_OCR_19601_lociStitched	chr11	86565855	86574196	3	2065	56809.7	5606.82	580	0.0898489	Treg	IK	Cltc	0	IK_CKO_Naive|IK_CKO_Treg|WT_Naive|WT_Treg
16_OCR_68534_lociStitched	chr2	167308659	167387916	16	8502	81175	29990.8	581	0.0898161	Treg	IK	Gm11476	0	IK_CKO_Naive|IK_CKO_Treg|WT_Naive|WT_Treg
9_OCR_81874_lociStitched	chr4	125903904	125940009	9	4426	71144.9	19991.3	582	0.0897624	Treg	IK	Trappc3	0	IK_CKO_Treg|WT_Treg
14_OCR_46378_lociStitched	chr16	55835989	55910806	14	9108	65457.4	14447.2	583	0.0895108	Treg	IK	Fam55c	0	IK_CKO_Treg|WT_Treg
6_OCR_82382_lociStitched	chr4	133205837	133244952	6	3930	63327.2	12325.1	584	0.0894965	Treg	IK	Pigv	0	IK_CKO_Treg|WT_Treg
12_OCR_106713_lociStitched	chr8	35794260	35824077	12	6923	54222.2	3226.2	585	0.0894859	Treg	IK	Dusp4	46273	IK_CKO_Treg|WT_Treg
7_OCR_82509_lociStitched	chr4	134469430	134487434	7	4176	61528.7	10642.2	586	0.0892937	Treg	IK	Syf2	0	IK_CKO_Naive|IK_CKO_Treg|WT_Naive|WT_Treg
6_OCR_66388_lociStitched	chr2	132311142	132342418	6	3192	58020.1	7180.97	587	0.0892106	Treg	IK	1700026D11Rik	0	IK_CKO_Naive|IK_CKO_Treg|WT_Naive|WT_Treg
5_OCR_104130_lociStitched	chr7	133838691	133852068	5	4172	60908.2	10276.2	588	0.088847	Treg	IK	Coro1a	0	IK_CKO_Naive|IK_CKO_Treg|WT_Naive|WT_Treg
12_OCR_31820_lociStitched	chr13	96713326	96758666	12	7598	58438.7	7911.83	589	0.0886627	Treg	IK	Sv2c	1102	IK_CKO_Naive|IK_CKO_Treg|WT_Naive|WT_Treg
17_OCR_113049_lociStitched	chr9	45950638	46015156	17	9045	61176	10697.1	590	0.0885785	Treg	IK	Sik3	0	IK_CKO_Treg|WT_Treg
3_OCR_20696_lociStitched	chr11	104302752	104310215	3	2415	56091.9	5683.82	591	0.0884542	Treg	IK	1700081L11Rik	0	IK_CKO_Naive|IK_CKO_Treg|WT_Naive|WT_Treg
7_OCR_102304_lociStitched	chr7	97490010	97512589	7	4155	53525.8	3138.48	592	0.0884177	Treg	IK	Sytl2	0	IK_CKO_Naive|IK_CKO_Treg|WT_Naive|WT_Treg
17_OCR_81680_lociStitched	chr4	122506411	122588334	17	9161	61040.8	10666.4	593	0.0883952	Treg	IK	Cap1	0	IK_CKO_Naive|IK_CKO_Treg|WT_Naive|WT_Treg
10_OCR_104147_lociStitched	chr7	133918061	133976092	10	5654	77953	27733	594	0.0881242	Treg	IK	4930451I11Rik	0	IK_CKO_Naive|IK_CKO_Treg|WT_Naive|WT_Treg
10_OCR_96791_lociStitched	chr6	125417123	125448516	10	6488	61938.4	11719	595	0.0881231	Treg	IK	Gm16749	0	IK_CKO_Treg|WT_Treg
20_OCR_5393_lociStitched	chr1	138496911	138604366	20	15022	69544.9	19449.4	596	0.0879057	Treg	IK	AC125186.1	0	IK_CKO_Naive|IK_CKO_Treg|WT_Naive|WT_Treg
4_OCR_43261_lociStitched	chr15	100495294	100500768	4	2390	53695	3814.83	597	0.0875279	Treg	IK	Bin2	0	IK_CKO_Naive|IK_CKO_Treg|WT_Naive|WT_Treg
19_OCR_15056_lociStitched	chr10	117261242	117311358	19	9202	61191.6	11331.2	598	0.0874932	Treg	IK	Rap1b	0	IK_CKO_Naive|IK_CKO_Treg|WT_Naive|WT_Treg
15_OCR_40806_lociStitched	chr15	59928759	59973756	15	7205	53186.5	3455.77	599	0.0872655	Treg	IK	U6	12415	IK_CKO_Naive|IK_CKO_Treg|WT_Naive|WT_Treg
5_OCR_98227_lociStitched	chr6	146020341	146031357	5	2631	53289.9	3611.04	600	0.0871746	Treg	IK	Itpr2	64372	IK_CKO_Naive|IK_CKO_Treg|WT_Naive|WT_Treg
26_OCR_77329_lociStitched	chr4	15192392	15256176	26	13049	58011.5	8374.84	601	0.0871006	Treg	IK	Tmem64	0	IK_CKO_Naive|IK_CKO_Treg|WT_Naive|WT_Treg
5_OCR_53113_lociStitched	chr17	88457236	88466038	5	3257	56383.9	6788.1	602	0.0870288	Treg	IK	Fbxo11	0	IK_CKO_Naive|IK_CKO_Treg|WT_Naive|WT_Treg
4_OCR_53357_lociStitched	chr18	3328512	3338375	4	2625	54524.6	4955.17	603	0.0869826	Treg	IK	Gm6225	0	IK_CKO_Naive|IK_CKO_Treg|WT_Naive|WT_Treg
19_OCR_114402_lociStitched	chr9	77757833	77814544	19	11926	65881.2	16417.8	604	0.0867964	Treg	IK	Elovl5	0	IK_CKO_Naive|IK_CKO_Treg|WT_Naive|WT_Treg
19_OCR_71409_lociStitched	chr3	52632981	52711402	19	9063	57302.2	7944.05	605	0.0866119	Treg	IK	U6	106303	IK_CKO_Naive|IK_CKO_Treg|WT_Naive|WT_Treg
23_OCR_3068_lociStitched	chr1	80695465	80763211	23	12399	56025.9	6754.28	606	0.0864601	Treg	IK	Dock10	0	IK_CKO_Naive|IK_CKO_Treg|WT_Naive|WT_Treg
4_OCR_59465_lociStitched	chr19	53533945	53539895	4	2479	51838.8	2586.47	607	0.0864261	Treg	IK	4833407H14Rik	0	IK_CKO_Treg|WT_Treg
32_OCR_8050_lociStitched	chr1	185829214	185943184	32	19134	65977.2	16730.8	608	0.0864158	Treg	IK	Dusp10	0	IK_CKO_Naive|IK_CKO_Treg|WT_Naive|WT_Treg
10_OCR_115697_lociStitched	chr9	107504400	107548229	10	6317	72668.5	23426.6	609	0.0864078	Treg	IK	Gnai2	0	IK_CKO_Naive|IK_CKO_Treg|WT_Naive|WT_Treg
19_OCR_18416_lociStitched	chr11	61433604	61513158	19	10422	75449	26308.5	610	0.0862299	Treg	IK	Fam83g	0	IK_CKO_Treg|WT_Treg
22_OCR_97885_lociStitched	chr6	142857394	142913952	22	13439	62643.6	13607.9	611	0.0860462	Treg	IK	St8sia1	0	IK_CKO_Naive|IK_CKO_Treg|WT_Naive|WT_Treg
4_OCR_106301_lociStitched	chr8	26177190	26185570	4	1786	52583.7	3570.72	612	0.0860061	Treg	IK	Plekha2	16247	IK_CKO_Treg|WT_Treg
19_OCR_74544_lociStitched	chr3	126273532	126333952	19	9763	57550.1	8537.35	613	0.0860057	Treg	IK	Camk2d	0	IK_CKO_Naive|IK_CKO_Treg|WT_Naive|WT_Treg
7_OCR_105218_lociStitched	chr7	150180945	150208023	7	3298	56723	7866.16	614	0.0857321	Treg	IK	Tspan32	0	IK_CKO_Treg|WT_Treg
15_OCR_6817_lociStitched	chr1	165983734	166029081	15	8083	52647.9	3872.63	615	0.085589	Treg	IK	Sell	0	IK_CKO_Naive|IK_CKO_Treg|WT_Naive|WT_Treg
13_OCR_65811_lociStitched	chr2	121943453	121990411	13	9463	57547	8799.93	616	0.0855396	Treg	IK	Trim69	0	IK_CKO_Naive|IK_CKO_Treg|WT_Naive|WT_Treg
18_OCR_61409_lociStitched	chr2	30480805	30583817	18	14597	94987.4	46242.1	617	0.0855364	Treg	IK	Mir3089	0	IK_CKO_Treg|WT_Treg
8_OCR_5355_lociStitched	chr1	138002052	138037237	8	4504	63262.6	14552.5	618	0.0854747	Treg	IK	Kif21b	0	IK_CKO_Naive|IK_CKO_Treg|WT_Naive|WT_Treg
16_OCR_114213_lociStitched	chr9	72886975	72939866	16	8571	59687.5	11022.5	619	0.0853955	Treg	IK	Rab27a	0	IK_CKO_Treg|WT_Treg
8_OCR_57753_lociStitched	chr19	6045958	6085948	8	7074	75485.1	27049.2	620	0.0849935	Treg	IK	Cdca5	0	IK_CKO_Naive|IK_CKO_Treg|WT_Naive|WT_Treg
21_OCR_32971_lociStitched	chr13	114363505	114429600	21	12601	64065.9	15770.3	621	0.0847473	Treg	IK	Snx18	0	IK_CKO_Treg|WT_Treg
9_OCR_50885_lociStitched	chr17	48543124	48572332	9	5661	57101.6	8841.26	622	0.0846855	Treg	IK	Apobec2	0	IK_CKO_Treg|WT_Naive|WT_Treg
10_OCR_113940_lociStitched	chr9	66434360	66471792	10	6283	57394.5	9328.05	623	0.0843452	Treg	IK	Usp3	0	IK_CKO_Naive|IK_CKO_Treg|WT_Naive|WT_Treg
5_OCR_113009_lociStitched	chr9	45744586	45763959	5	4505	61302	13309.3	624	0.0842159	Treg	IK	Sidt2	0	IK_CKO_Naive|IK_CKO_Treg|WT_Naive|WT_Treg
10_OCR_67836_lociStitched	chr2	156682643	156713256	10	5270	59024.9	11042.1	625	0.0841985	Treg	IK	Sla2	0	IK_CKO_Naive|IK_CKO_Treg|WT_Naive|WT_Treg
11_OCR_41601_lociStitched	chr15	76329672	76383632	11	6004	76089	28134.7	626	0.0841483	Treg	IK	Slc52a2	0	IK_CKO_Treg|WT_Treg
12_OCR_74563_lociStitched	chr3	126353071	126396682	12	7537	52717	4779.77	627	0.0841184	Treg	IK	Gm15551	0	IK_CKO_Treg|WT_Treg
6_OCR_104166_lociStitched	chr7	134157792	134171254	6	4188	62226.7	14324.9	628	0.0840563	Treg	IK	Maz	0	IK_CKO_Naive|IK_CKO_Treg|WT_Naive|WT_Treg
7_OCR_1295_lociStitched	chr1	40522287	40536830	7	3091	50212.6	2447.59	629	0.0838163	Treg	IK	Il18r1	0	IK_CKO_Treg|WT_Naive|WT_Treg
18_OCR_6724_lociStitched	chr1	163664165	163740020	18	11760	56914	9170.87	630	0.0837779	Treg	IK	Fasl	0	IK_CKO_Naive|IK_CKO_Treg|WT_Naive|WT_Treg
13_OCR_63513_lociStitched	chr2	71624214	71655110	13	6990	56913.5	9185.38	631	0.0837516	Treg	IK	Itga6	0	IK_CKO_Naive|IK_CKO_Treg|WT_Naive|WT_Treg
6_OCR_68471_lociStitched	chr2	166518769	166545592	6	4714	59021.3	11303.2	632	0.083734	Treg	IK	Prex1	0	IK_CKO_Naive|IK_CKO_Treg|WT_Naive|WT_Treg
6_OCR_16227_lociStitched	chr11	6419299	6429073	6	3258	51963.5	4300.56	633	0.0836371	Treg	IK	SNORA9	0	IK_CKO_Treg|WT_Treg
11_OCR_114806_lociStitched	chr9	88220869	88261473	11	6617	54092.6	6439.79	634	0.0836194	Treg	IK	Nt5e	0	IK_CKO_Treg|WT_Treg
18_OCR_112892_lociStitched	chr9	44285930	44346477	18	11323	76325.5	28759.8	635	0.0834666	Treg	IK	Cxcr5	0	IK_CKO_Naive|IK_CKO_Treg|WT_Naive|WT_Treg
25_OCR_111735_lociStitched	chr9	14769836	14850524	25	13126	63566	16097.3	636	0.0832964	Treg	IK	Panx1	0	IK_CKO_Naive|IK_CKO_Treg|WT_Treg
8_OCR_81426_lociStitched	chr4	118778327	118815175	8	5039	61794.1	14333.9	637	0.0832814	Treg	IK	Gm12868	0	IK_CKO_Treg|WT_Treg
8_OCR_13897_lociStitched	chr10	94717858	94731370	8	4242	51503.7	4045.49	638	0.0832779	Treg	IK	Cradd	54950	IK_CKO_Treg|WT_Treg
5_OCR_49700_lociStitched	chr17	28647376	28665406	5	3504	57914.2	10632.3	639	0.0829685	Treg	IK	E230001N04Rik	0	IK_CKO_Naive|IK_CKO_Treg|WT_Naive|WT_Treg
5_OCR_90538_lociStitched	chr5	144968185	144992582	5	3647	57991.7	10715.2	640	0.082959	Treg	IK	Tecpr1	0	IK_CKO_Naive|IK_CKO_Treg|WT_Naive|WT_Treg
9_OCR_1052_lociStitched	chr1	36817229	36854731	9	5152	62800.8	15537.1	641	0.0829367	Treg	IK	Zap70	0	IK_CKO_Naive|IK_CKO_Treg|WT_Naive|WT_Treg
13_OCR_82979_lociStitched	chr4	141091236	141151785	13	7908	70648.6	23517.2	642	0.0827043	Treg	IK	B330016D10Rik	0	IK_CKO_Naive|IK_CKO_Treg|WT_Naive|WT_Treg
10_OCR_31844_lociStitched	chr13	97276371	97325533	10	5424	56516.6	9414.52	643	0.082653	Treg	IK	Col4a3bp	0	IK_CKO_Treg|WT_Treg
8_OCR_42898_lociStitched	chr15	96096370	96128766	8	5870	59631.3	12540.5	644	0.0826332	Treg	IK	Arid2	0	IK_CKO_Naive|IK_CKO_Treg|WT_Naive|WT_Treg
11_OCR_85338_lociStitched	chr5	34529716	34579009	11	5112	61813.4	14728.7	645	0.0826224	Treg	IK	Zfyve28	0	IK_CKO_Naive|IK_CKO_Treg|WT_Naive|WT_Treg
6_OCR_27414_lociStitched	chr13	5859873	5871969	6	2278	53021.6	6018.97	646	0.0824785	Treg	IK	Klf6	0	IK_CKO_Naive|IK_CKO_Treg|WT_Naive|WT_Treg
6_OCR_68327_lociStitched	chr2	164725286	164750482	6	4142	61369.9	14384.4	647	0.0824484	Treg	IK	Gm11458	0	IK_CKO_Naive|IK_CKO_Treg|WT_Naive|WT_Treg
26_OCR_36684_lociStitched	chr14	75222508	75349067	26	13576	65456.3	18490.3	648	0.0824143	Treg	IK	Lrch1	0	IK_CKO_Naive|IK_CKO_Treg|WT_Naive|WT_Treg
13_OCR_95255_lociStitched	chr6	98963216	99018005	13	8411	56295.7	9341.52	649	0.0823934	Treg	IK	Foxp1	0	IK_CKO_Naive|IK_CKO_Treg|WT_Naive|WT_Treg
12_OCR_19200_lociStitched	chr11	77967381	78021699	12	8618	74296.2	27392.6	650	0.0823047	Treg	IK	Proca1	0	IK_CKO_Treg|WT_Treg
7_OCR_1813_lociStitched	chr1	55082977	55110240	7	4080	54883.1	8001.69	651	0.0822658	Treg	IK	Coq10b	0	IK_CKO_Naive|IK_CKO_Treg|WT_Naive|WT_Treg
15_OCR_1730_lociStitched	chr1	53805492	53882121	15	9881	55885.5	9019.23	652	0.0822392	Treg	IK	Stk17b	0	IK_CKO_Naive|IK_CKO_Treg|WT_Naive|WT_Treg
6_OCR_116612_lociStitched	chr9	123832777	123849220	6	3416	48531.5	1695.27	653	0.0821865	Treg	IK	Gm4694	0	IK_CKO_Treg|WT_Treg
8_OCR_18764_lociStitched	chr11	69707932	69762739	8	9019	76116	29294.3	654	0.0821608	Treg	IK	Slc2a4	0	IK_CKO_Naive|IK_CKO_Treg|WT_Naive|WT_Treg
14_OCR_2536_lociStitched	chr1	69793237	69837519	14	7894	49352.3	2537.36	655	0.0821491	Treg	IK	Spag16	36042	IK_CKO_Treg|WT_Treg
19_OCR_52167_lociStitched	chr17	73481805	73525381	19	10340	51315.1	4636.49	656	0.0819099	Treg	IK	Lclat1	0	IK_CKO_Naive|IK_CKO_Treg|WT_Naive|WT_Treg
4_OCR_50367_lociStitched	chr17	36033661	36056216	4	3756	58417.4	11803	657	0.0817972	Treg	IK	Mir1894	0	IK_CKO_Naive|IK_CKO_Treg|WT_Naive|WT_Treg
8_OCR_107992_lociStitched	chr8	73108550	73154456	8	6646	76428.9	29857.3	658	0.0817222	Treg	IK	Lrrc25	0	IK_CKO_Treg|WT_Treg
12_OCR_12056_lociStitched	chr10	66558873	66590349	12	7433	57280	10733.3	659	0.0816784	Treg	IK	Jmjd1c	0	IK_CKO_Treg|WT_Treg
7_OCR_96427_lociStitched	chr6	120061688	120085148	7	4198	50267.7	3723.1	660	0.0816748	Treg	IK	AC113092.1	0	IK_CKO_Treg|WT_Treg
9_OCR_312_lociStitched	chr1	13345711	13379302	9	7369	57003.9	10524.1	661	0.0815611	Treg	IK	Ncoa2	0	IK_CKO_Naive|IK_CKO_Treg|WT_Naive|WT_Treg
8_OCR_114095_lociStitched	chr9	70085395	70109868	8	4194	51006.6	4713.5	662	0.0812334	Treg	IK	Myo1e	30237	IK_CKO_Treg|WT_Treg
11_OCR_84039_lociStitched	chr5	3341132	3384415	11	8328	54960.8	8743.17	663	0.0811009	Treg	IK	Cdk6	0	IK_CKO_Treg|WT_Treg
6_OCR_82917_lociStitched	chr4	140500721	140520812	6	3692	54876.6	8689.36	664	0.0810476	Treg	IK	Sdhb	0	IK_CKO_Naive|IK_CKO_Treg|WT_Naive|WT_Treg
11_OCR_96448_lociStitched	chr6	120137567	120157196	11	4847	52941.4	6758.26	665	0.0810404	Treg	IK	Ninj2	0	IK_CKO_Treg|WT_Treg
13_OCR_20703_lociStitched	chr11	104442781	104492996	13	7674	57004.1	10856.5	666	0.0809781	Treg	IK	Itgb3	0	IK_CKO_Treg|WT_Treg
28_OCR_28312_lociStitched	chr13	23580377	23690310	28	16575	70181.2	24097.3	667	0.0808663	Treg	IK	Hist1h4d	0	IK_CKO_Naive|IK_CKO_Treg|WT_Naive|WT_Treg
19_OCR_49140_lociStitched	chr17	17718107	17792664	19	13189	57043.6	10967.3	668	0.0808528	Treg	IK	Lnpep	0	IK_CKO_Naive|IK_CKO_Treg|WT_Naive|WT_Treg
9_OCR_49396_lociStitched	chr17	24664535	24698889	9	4801	59865.3	13975.2	669	0.0805262	Treg	IK	Pkd1	0	IK_CKO_Treg|WT_Treg
3_OCR_99522_lociStitched	chr7	29648282	29653017	3	2108	49772.4	3886.49	670	0.0805189	Treg	IK	Lgals7	0	IK_CKO_Treg|WT_Treg
5_OCR_49636_lociStitched	chr17	27951629	27977366	5	4262	54660.2	8868.97	671	0.0803528	Treg	IK	Snrpc	0	IK_CKO_Naive|IK_CKO_Treg|WT_Naive|WT_Treg
3_OCR_52691_lociStitched	chr17	83666541	83678271	3	4183	52017.9	6293.15	672	0.080236	Treg	IK	SNORA31	0	IK_CKO_Treg|WT_Treg
13_OCR_33112_lociStitched	chr13	117779120	117823836	13	8145	53788.9	8138.31	673	0.0801059	Treg	IK	Parp8	0	IK_CKO_Naive|IK_CKO_Treg|WT_Naive|WT_Treg
4_OCR_18747_lociStitched	chr11	69566257	69580352	4	3714	53950	8373.84	674	0.0799754	Treg	IK	Zbtb4	0	IK_CKO_Naive|IK_CKO_Treg|WT_Naive|WT_Treg
11_OCR_105390_lociStitched	chr8	3313783	3356089	11	6324	52396	6853.57	675	0.0799161	Treg	IK	A430078G23Rik	0	IK_CKO_Naive|IK_CKO_Treg|WT_Naive|WT_Treg
15_OCR_111410_lociStitched	chr9	7750617	7805521	15	8130	56238.2	10744.7	676	0.0798302	Treg	IK	CT030639.1	0	IK_CKO_Naive|IK_CKO_Treg|WT_Naive|WT_Treg
10_OCR_21315_lociStitched	chr11	115835814	115892583	10	7812	75542.5	30064.9	677	0.0798025	Treg	IK	Unk	0	IK_CKO_Naive|IK_CKO_Treg|WT_Naive|WT_Treg
5_OCR_59365_lociStitched	chr19	47577088	47587881	5	3276	51197.7	5748.35	678	0.0797528	Treg	IK	Obfc1	0	IK_CKO_Naive|IK_CKO_Treg|WT_Naive|WT_Treg
7_OCR_82705_lociStitched	chr4	136895302	136924399	7	4739	53104.9	7669.97	679	0.0797276	Treg	IK	Cdc42	0	IK_CKO_Naive|IK_CKO_Treg|WT_Naive|WT_Treg
15_OCR_14095_lociStitched	chr10	96148479	96195325	15	7199	51052.8	5813.59	680	0.079384	Treg	IK	Btg1	68843	IK_CKO_Naive|IK_CKO_Treg|WT_Naive|WT_Treg
29_OCR_46564_lociStitched	chr16	58661924	58751829	29	14035	56388.4	11175.2	681	0.0793385	Treg	IK	SNORA17	0	IK_CKO_Treg|WT_Treg
9_OCR_58549_lociStitched	chr19	29528186	29561302	9	4245	49475.3	4281.9	682	0.0793037	Treg	IK	A930007I19Rik	35176	IK_CKO_Treg|WT_Treg
19_OCR_101582_lociStitched	chr7	82774518	82831978	19	10204	49157	3970.49	683	0.0792917	Treg	IK	U6	0	IK_CKO_Treg|WT_Treg
15_OCR_72570_lociStitched	chr3	84457749	84519757	15	7423	55974.6	10851.4	684	0.0791805	Treg	IK	Tmem154	0	IK_CKO_Treg|WT_Treg
13_OCR_114298_lociStitched	chr9	75249297	75289926	13	7348	56340.2	11331.4	685	0.0789798	Treg	IK	Leo1	0	IK_CKO_Naive|IK_CKO_Treg|WT_Naive|WT_Treg
5_OCR_73267_lociStitched	chr3	96066146	96082582	5	4956	51224.4	6488.93	686	0.0785002	Treg	IK	Hist2h2bb	0	IK_CKO_Naive|IK_CKO_Treg|WT_Naive|WT_Treg
20_OCR_61589_lociStitched	chr2	32389956	32464502	20	11476	76514	31793.9	687	0.0784732	Treg	IK	St6galnac6	0	IK_CKO_Naive|IK_CKO_Treg|WT_Naive|WT_Treg
9_OCR_67855_lociStitched	chr2	156942835	156974421	9	5492	49934.3	5224.32	688	0.0784554	Treg	IK	Mir5111	0	IK_CKO_Naive|IK_CKO_Treg|WT_Naive|WT_Treg
8_OCR_68761_lociStitched	chr2	169926624	169959367	8	5271	55578	10932.9	689	0.0783415	Treg	IK	Zfp217	0	IK_CKO_Treg|WT_Treg
11_OCR_105061_lociStitched	chr7	148173125	148211600	11	5574	52649.2	8048.97	690	0.0782628	Treg	IK	Ifitm6	0	IK_CKO_Treg|WT_Treg
10_OCR_84826_lociStitched	chr5	23888924	23931577	10	7082	65847.7	21381.9	691	0.0780268	Treg	IK	Slc4a2	0	IK_CKO_Treg
9_OCR_96625_lociStitched	chr6	122751091	122785037	9	7267	57039.5	12580.4	692	0.0780151	Treg	IK	Foxj2	0	IK_CKO_Naive|IK_CKO_Treg|WT_Naive|WT_Treg
7_OCR_82322_lociStitched	chr4	132714614	132741872	7	4726	50879.8	6471.05	693	0.0779268	Treg	IK	Wasf2	0	IK_CKO_Naive|IK_CKO_Treg|WT_Naive|WT_Treg
12_OCR_7906_lociStitched	chr1	183157044	183214740	12	6834	56455.5	12070	694	0.0778861	Treg	IK	Rpl35a-ps2	0	IK_CKO_Treg|WT_Treg
7_OCR_29178_lociStitched	chr13	43330315	43368449	7	5335	50294.9	5990.85	695	0.0777431	Treg	IK	Gfod1	31091	IK_CKO_Treg|WT_Treg
10_OCR_117152_lociStitched	chrX	39497028	39555981	10	4678	50015.7	5724.34	696	0.0777209	Treg	IK	Stag2	0	IK_CKO_Naive|IK_CKO_Treg|WT_Naive|WT_Treg
10_OCR_54516_lociStitched	chr18	34999838	35021427	10	5090	57340.4	13065.7	697	0.0776916	Treg	IK	Egr1	0	IK_CKO_Naive|IK_CKO_Treg|WT_Naive|WT_Treg
11_OCR_48454_lociStitched	chr17	5975133	6020003	11	7033	57285.5	13106.5	698	0.0775237	Treg	IK	Synj2	0	IK_CKO_Treg|WT_Treg
16_OCR_92341_lociStitched	chr6	37348819	37431738	16	9245	55331.8	11343.3	699	0.0771894	Treg	IK	Creb3l2	0	IK_CKO_Treg|WT_Treg
10_OCR_24994_lociStitched	chr12	81231373	81247968	10	4404	50462.1	6642.98	700	0.0768921	Treg	IK	2310015A10Rik	0	IK_CKO_Treg|WT_Treg
13_OCR_95167_lociStitched	chr6	97225890	97272448	13	7336	51684	7966.07	701	0.0767146	Treg	IK	Frmd4b	0	IK_CKO_Treg|WT_Treg
7_OCR_16213_lociStitched	chr11	6288709	6316858	7	5337	61621	17973.1	702	0.0765916	Treg	IK	Ppia	0	IK_CKO_Naive|IK_CKO_Treg|WT_Naive|WT_Treg
14_OCR_94834_lociStitched	chr6	91054734	91090235	14	6703	51891.8	8356.94	703	0.0763934	Treg	IK	Nup210	0	IK_CKO_Naive|IK_CKO_Treg|WT_Naive|WT_Treg
2_OCR_7675_lociStitched	chr1	180335503	180343349	2	2011	48657.8	5182.28	704	0.0762891	Treg	IK	Efcab2	0	IK_CKO_Naive|IK_CKO_Treg|WT_Naive|WT_Treg
30_OCR_56275_lociStitched	chr18	68278613	68404427	30	16767	57685.7	14279.9	705	0.0761669	Treg	IK	D18Ertd653e	0	IK_CKO_Treg|WT_Treg
14_OCR_24660_lociStitched	chr12	74976092	75032590	14	7545	51989.5	8587.7	706	0.0761598	Treg	IK	Hif1a	0	IK_CKO_Treg|WT_Treg
7_OCR_42155_lociStitched	chr15	82168889	82211194	7	4545	59523.1	16135.1	707	0.0761357	Treg	IK	Cyp2d22	0	IK_CKO_Naive|IK_CKO_Treg|WT_Naive|WT_Treg
6_OCR_82316_lociStitched	chr4	132674100	132695960	6	3519	51296.7	7913.32	708	0.0761275	Treg	IK	Wasf2	0	IK_CKO_Naive|IK_CKO_Treg|WT_Naive|WT_Treg
16_OCR_56186_lociStitched	chr18	67398686	67468776	16	12019	59541.5	16162.8	709	0.0761193	Treg	IK	Impa2	0	IK_CKO_Treg|WT_Treg
2_OCR_17881_lociStitched	chr11	51813380	51818068	2	1779	49609.4	6247.23	710	0.0760902	Treg	IK	Cdkl3	0	IK_CKO_Naive|IK_CKO_Treg|WT_Naive|WT_Treg
6_OCR_15837_lociStitched	chr10	127956016	127986616	6	5013	55181	11854.4	711	0.0760278	Treg	IK	Rpl41	0	IK_CKO_Naive|IK_CKO_Treg|WT_Naive|WT_Treg
6_OCR_57738_lociStitched	chr19	5871313	5894665	6	3626	53625.5	10356.6	712	0.0759267	Treg	IK	Tigd3	0	IK_CKO_Treg|WT_Naive|WT_Treg
28_OCR_111714_lociStitched	chr9	14648194	14747651	28	13362	59982.5	16718.7	713	0.0759177	Treg	IK	Folr4	0	IK_CKO_Naive|IK_CKO_Treg|WT_Naive|WT_Treg
15_OCR_59418_lociStitched	chr19	53237135	53293880	15	8771	51734.4	8477.7	714	0.0759053	Treg	IK	U6	2781	IK_CKO_Naive|IK_CKO_Treg|WT_Naive|WT_Treg
10_OCR_73846_lociStitched	chr3	106285221	106300284	10	4178	47609.6	4390.86	715	0.0758387	Treg	IK	Dennd2d	0	IK_CKO_Naive|IK_CKO_Treg|WT_Naive|WT_Treg
6_OCR_1928_lociStitched	chr1	58464254	58481282	6	5004	48165.4	4973.88	716	0.0757909	Treg	IK	Clk1	0	IK_CKO_Naive|IK_CKO_Treg|WT_Naive|WT_Treg
37_OCR_8571_lociStitched	chr1	193099298	193271668	37	22008	85598.9	42420.3	717	0.0757683	Treg	IK	Ppp2r5a	0	IK_CKO_Naive|IK_CKO_Treg|WT_Naive|WT_Treg
7_OCR_78530_lociStitched	chr4	48042547	48066090	7	3704	58626.8	15448.9	718	0.0757669	Treg	IK	Nr4a3	0	IK_CKO_Naive|IK_CKO_Treg|WT_Naive|WT_Treg
5_OCR_57697_lociStitched	chr19	5636787	5664013	5	4856	63050	19910.4	719	0.0756998	Treg	IK	Sipa1	0	IK_CKO_Naive|IK_CKO_Treg|WT_Naive|WT_Treg
6_OCR_88770_lociStitched	chr5	115921203	115942321	6	4605	50894.4	7813.66	720	0.0755964	Treg	IK	U4	0	IK_CKO_Naive|IK_CKO_Treg|WT_Naive|WT_Treg
9_OCR_94032_lociStitched	chr6	72484135	72519122	9	5076	53362.2	10345.7	721	0.0754838	Treg	IK	Capg	0	IK_CKO_Treg|WT_Naive|WT_Treg
10_OCR_86491_lociStitched	chr5	65874952	65929346	10	6103	56575.2	13609.4	722	0.0753948	Treg	IK	Ube2k	0	IK_CKO_Naive|IK_CKO_Treg|WT_Naive|WT_Treg
3_OCR_20637_lociStitched	chr11	103123601	103129442	3	2106	48784	5842.17	723	0.0753528	Treg	IK	1700028N14Rik	0	IK_CKO_Naive|IK_CKO_Treg|WT_Naive|WT_Treg
10_OCR_50242_lociStitched	chr17	35225848	35273157	10	6349	69090.1	26190.3	724	0.075279	Treg	IK	Bag6	0	IK_CKO_Naive|IK_CKO_Treg|WT_Naive|WT_Treg
11_OCR_42131_lociStitched	chr15	81957805	82018637	11	6568	65157.2	22264.5	725	0.0752664	Treg	IK	Srebf2	0	IK_CKO_Naive|IK_CKO_Treg|WT_Naive|WT_Treg
12_OCR_3232_lociStitched	chr1	87617053	87660318	12	7953	49919.2	7034.89	726	0.0752517	Treg	IK	A630001G21Rik	0	IK_CKO_Naive|IK_CKO_Treg|WT_Naive|WT_Treg
4_OCR_57861_lociStitched	chr19	7557041	7573670	4	3439	50771.7	7893.79	727	0.0752405	Treg	IK	Atl3	0	IK_CKO_Naive|IK_CKO_Treg|WT_Naive|WT_Treg
9_OCR_102843_lociStitched	chr7	108686129	108713013	9	4883	45939.4	3158.87	728	0.0750696	Treg	IK	Art2a-ps	0	IK_CKO_Treg|WT_Treg
19_OCR_29542_lociStitched	chr13	49337297	49422682	19	11154	63424	20688.8	729	0.0749901	Treg	IK	Fgd3	0	IK_CKO_Naive|IK_CKO_Treg|WT_Naive|WT_Treg
3_OCR_21012_lociStitched	chr11	109511387	109514793	3	2138	47165.6	4511.93	730	0.0748471	Treg	IK	Prkar1a	0	IK_CKO_Treg|WT_Naive|WT_Treg
16_OCR_12100_lociStitched	chr10	66942818	67012651	16	9840	61006.1	18408	731	0.0747496	Treg	IK	Ado	0	IK_CKO_Naive|IK_CKO_Treg|WT_Naive|WT_Treg
2_OCR_95892_lociStitched	chr6	113025398	113027719	2	1924	48933.6	6338.88	732	0.0747437	Treg	IK	Setd5	0	IK_CKO_Naive|IK_CKO_Treg|WT_Naive|WT_Treg
3_OCR_19857_lociStitched	chr11	93856361	93858696	3	2149	46862.7	4367.62	733	0.0745689	Treg	IK	Spag9	0	IK_CKO_Treg|WT_Treg
10_OCR_72017_lociStitched	chr3	68760115	68785464	10	5235	46287.3	4167.38	734	0.0739104	Treg	IK	Ift80	0	IK_CKO_Naive|IK_CKO_Treg|WT_Naive|WT_Treg
12_OCR_20165_lociStitched	chr11	97627513	97702705	12	7867	66665.2	24640.4	735	0.0737436	Treg	IK	B230217C12Rik	0	IK_CKO_Naive|IK_CKO_Treg|WT_Naive|WT_Treg
7_OCR_18739_lociStitched	chr11	69468889	69496570	7	4881	57324.6	15448.8	736	0.0734821	Treg	IK	2010012P19Rik	0	IK_CKO_Naive|IK_CKO_Treg|WT_Naive|WT_Treg
24_OCR_99247_lociStitched	chr7	25668721	25760528	24	12730	86684.2	44856.9	737	0.0733969	Treg	IK	Rabac1	0	IK_CKO_Naive|IK_CKO_Treg|WT_Naive|WT_Treg
5_OCR_9770_lociStitched	chr10	19211277	19226564	5	3622	43757.5	2020.94	738	0.0732378	Treg	IK	Ifngr1	85190	IK_CKO_Treg|WT_Treg
14_OCR_61532_lociStitched	chr2	31892798	31940497	14	7665	63225	21512.2	739	0.073196	Treg	IK	Fam78a	0	IK_CKO_Naive|IK_CKO_Treg|WT_Naive|WT_Treg
3_OCR_74165_lociStitched	chr3	115496216	115504949	3	2808	44723.4	3024.24	740	0.0731722	Treg	IK	Gm9889	78147	IK_CKO_Naive|IK_CKO_Treg|WT_Naive|WT_Treg
15_OCR_26387_lociStitched	chr12	108356598	108399294	15	8934	49646.9	7962.8	741	0.0731457	Treg	IK	Gm16084	0	IK_CKO_Naive|IK_CKO_Treg|WT_Naive|WT_Treg
12_OCR_57773_lociStitched	chr19	6260499	6306977	12	6443	63419.2	21774.9	742	0.0730758	Treg	IK	Cdc42bpg	0	IK_CKO_Treg|WT_Treg
27_OCR_64902_lociStitched	chr2	103465386	103562269	27	13965	61278.5	19647.9	743	0.0730519	Treg	IK	Abtb2	0	IK_CKO_Naive|IK_CKO_Treg|WT_Naive|WT_Treg
7_OCR_78078_lociStitched	chr4	40719800	40733117	7	3077	45078	3505.03	744	0.0729508	Treg	IK	Gm12396	0	IK_CKO_Naive|IK_CKO_Treg|WT_Naive|WT_Treg
9_OCR_72998_lociStitched	chr3	90407441	90444148	9	5049	48053.1	6519.16	745	0.0728823	Treg	IK	S100a6	0	IK_CKO_Treg|WT_Treg
12_OCR_22323_lociStitched	chr12	15796997	15845596	12	6814	51529.5	10094	746	0.0727095	Treg	IK	Gm5432	0	IK_CKO_Naive|IK_CKO_Treg|WT_Naive|WT_Treg
13_OCR_88736_lociStitched	chr5	115600553	115655181	13	8815	65843.1	24511.6	747	0.072527	Treg	IK	Gm13828	0	IK_CKO_Naive|IK_CKO_Treg|WT_Naive|WT_Treg
2_OCR_17890_lociStitched	chr11	51911711	51923233	2	1978	47214.9	5928.07	748	0.0724485	Treg	IK	AL935177.1	0	IK_CKO_Treg|WT_Treg
24_OCR_111260_lociStitched	chr8	130987872	131075653	24	13355	46638	5380.98	749	0.0723964	Treg	IK	U6	99243	IK_CKO_Treg|WT_Treg
19_OCR_36885_lociStitched	chr14	78663747	78757148	19	13430	52631.5	11497.7	750	0.0721801	Treg	IK	AC126690.2	0	IK_CKO_Treg
7_OCR_117750_lociStitched	chrX	98449274	98481185	7	5464	47490	6391.77	751	0.0721175	Treg	IK	Med12	0	IK_CKO_Naive|IK_CKO_Treg|WT_Naive|WT_Treg
6_OCR_19028_lociStitched	chr11	75267557	75286960	6	3944	49972.4	8909.86	752	0.0720551	Treg	IK	Tlcd2	0	IK_CKO_Treg|WT_Treg
10_OCR_9143_lociStitched	chr10	7648587	7676785	10	5340	47826.6	6764.7	753	0.0720539	Treg	IK	Tab2	0	IK_CKO_Naive|IK_CKO_Treg|WT_Naive|WT_Treg
16_OCR_92567_lociStitched	chr6	41041201	41102631	16	7232	43934.7	2887.21	754	0.0720287	Treg	IK	Trbv16	0	IK_CKO_Naive|IK_CKO_Treg|WT_Naive|WT_Treg
8_OCR_50290_lociStitched	chr17	35516000	35532150	8	3530	47723.2	6695.79	755	0.0719935	Treg	IK	H2-Q5	0	IK_CKO_Naive|IK_CKO_Treg|WT_Treg
14_OCR_70157_lociStitched	chr3	21834400	21872466	14	8457	46383.4	5492.92	756	0.0717531	Treg	IK	Tbl1xr1	103107	IK_CKO_Treg|WT_Treg
29_OCR_118553_lociStitched	chrX	163526466	163620959	29	13679	43778.6	2891.49	757	0.0717472	Treg	IK	Gm15228	0	IK_CKO_Naive|IK_CKO_Treg|WT_Naive|WT_Treg
17_OCR_102282_lociStitched	chr7	97146379	97223481	17	11573	48088.5	7324.69	758	0.0715308	Treg	IK	Eed	16885	IK_CKO_Treg|WT_Treg
14_OCR_45569_lociStitched	chr16	38619050	38714754	14	10368	57891.3	17150.2	759	0.0714911	Treg	IK	Gm15530	0	IK_CKO_Naive|IK_CKO_Treg|WT_Naive|WT_Treg
2_OCR_21410_lociStitched	chr11	116970458	116977066	2	2617	44931.1	4225.82	760	0.0714281	Treg	IK	Sec14l1	0	IK_CKO_Treg|WT_Treg
6_OCR_102728_lociStitched	chr7	106962035	106983123	6	4288	45387.7	4689.97	761	0.0714149	Treg	IK	Neu3	0	IK_CKO_Treg|WT_Treg
9_OCR_34709_lociStitched	chr14	32196344	32228738	9	5440	50903.9	10236.5	762	0.0713617	Treg	IK	Sh3bp5	0	IK_CKO_Naive|IK_CKO_Treg|WT_Naive|WT_Treg
13_OCR_16961_lociStitched	chr11	23634142	23686783	13	7111	48150.7	7511.87	763	0.0713115	Treg	IK	U1	0	IK_CKO_Naive|IK_CKO_Treg|WT_Naive|WT_Treg
3_OCR_21730_lociStitched	chr11	120433832	120443664	3	3114	50265.1	9626.51	764	0.0713111	Treg	IK	Arhgdia	0	IK_CKO_Naive|IK_CKO_Treg|WT_Naive|WT_Treg
18_OCR_6642_lociStitched	chr1	162688309	162743455	18	8552	47955	7350.96	765	0.0712504	Treg	IK	Rabgap1l	0	IK_CKO_Treg|WT_Treg
11_OCR_113534_lociStitched	chr9	57783567	57822429	11	5803	56870.7	16294.8	766	0.0712009	Treg	IK	Sema7a	0	IK_CKO_Treg
4_OCR_41959_lociStitched	chr15	80085221	80096985	4	2807	49430	8948.87	767	0.0710347	Treg	IK	Rps19bp1	0	IK_CKO_Naive|IK_CKO_Treg|WT_Naive|WT_Treg
15_OCR_13714_lociStitched	chr10	92788087	92838544	15	8413	47348.8	7023.61	768	0.0707612	Treg	IK	Elk3	14206	IK_CKO_Treg|WT_Treg
5_OCR_98910_lociStitched	chr7	17426813	17444036	5	3551	49891.6	9591.49	769	0.0707171	Treg	IK	Prkd2	0	IK_CKO_Naive|IK_CKO_Treg|WT_Naive|WT_Treg
9_OCR_94522_lociStitched	chr6	86797853	86826761	9	3968	47122.9	6862.76	770	0.070647	Treg	IK	Aak1	0	IK_CKO_Naive|IK_CKO_Treg|WT_Naive|WT_Treg
21_OCR_14944_lociStitched	chr10	116350572	116400099	21	9177	55896.2	15650.5	771	0.0706215	Treg	IK	Rab3ip	0	IK_CKO_Naive|IK_CKO_Treg|WT_Naive|WT_Treg
11_OCR_34087_lociStitched	chr14	21576588	21631509	11	6172	54651.9	14416.8	772	0.0706031	Treg	IK	Camk2g	0	IK_CKO_Treg|WT_Treg
24_OCR_99716_lociStitched	chr7	31802778	31896819	24	11189	72881.8	32651	773	0.0705954	Treg	IK	Hpn	0	IK_CKO_Naive|IK_CKO_Treg|WT_Naive|WT_Treg
8_OCR_58537_lociStitched	chr19	29429307	29449869	8	4155	45561.3	5368.74	774	0.0705284	Treg	IK	Cd274	0	IK_CKO_Treg|WT_Treg
6_OCR_73793_lociStitched	chr3	105694770	105714143	6	3994	44207.2	4045.08	775	0.0704751	Treg	IK	Adora3	0	IK_CKO_Treg|WT_Treg
6_OCR_20148_lociStitched	chr11	97520290	97526552	6	2742	47134.1	7001.54	776	0.0704231	Treg	IK	Mllt6	0	IK_CKO_Treg|WT_Treg
21_OCR_63303_lociStitched	chr2	68219289	68323752	21	12798	58645.5	18594.4	777	0.0702802	Treg	IK	7SK	0	IK_CKO_Treg|WT_Treg
5_OCR_23147_lociStitched	chr12	33986905	34002967	5	3770	44617	4593.73	778	0.0702314	Treg	IK	Atxn7l1	0	IK_CKO_Naive|IK_CKO_Treg|WT_Naive|WT_Treg
17_OCR_111680_lociStitched	chr9	14132767	14195017	17	8440	52613.7	12599.4	779	0.0702156	Treg	IK	Endod1	0	IK_CKO_Treg|WT_Treg
15_OCR_89179_lociStitched	chr5	122708055	122768532	15	7792	58408.7	18427.3	780	0.0701578	Treg	IK	Gm15842	0	IK_CKO_Naive|IK_CKO_Treg|WT_Naive|WT_Treg
5_OCR_29955_lociStitched	chr13	58204848	58230882	5	4810	50404.4	10468.3	781	0.0700785	Treg	IK	Hnrnpa0	0	IK_CKO_Naive|IK_CKO_Treg|WT_Naive|WT_Treg
17_OCR_9731_lociStitched	chr10	18781629	18859586	17	10341	46493.6	6602.96	782	0.0699985	Treg	IK	Tnfaip3	46165	IK_CKO_Naive|IK_CKO_Treg|WT_Naive|WT_Treg
10_OCR_56116_lociStitched	chr18	65947975	65979194	10	5789	47218.7	7333.34	783	0.0699894	Treg	IK	Sec11c	0	IK_CKO_Treg|WT_Treg
12_OCR_4979_lociStitched	chr1	132976381	133018881	12	7116	50218	10416.8	784	0.0698417	Treg	IK	7SK	0	IK_CKO_Treg|WT_Treg
11_OCR_7314_lociStitched	chr1	173691918	173719901	11	6375	42732.8	3050.15	785	0.0696337	Treg	IK	Slamf1	0	IK_CKO_Treg|WT_Treg
9_OCR_59131_lociStitched	chr19	44355229	44389868	9	6584	49045.4	9390.63	786	0.0695846	Treg	IK	Mir5114	0	IK_CKO_Naive|IK_CKO_Treg|WT_Naive|WT_Treg
4_OCR_25553_lociStitched	chr12	92820873	92829126	4	2761	45880.1	6281.36	787	0.0694864	Treg	IK	Gtf2a1	0	IK_CKO_Naive|IK_CKO_Treg|WT_Naive|WT_Treg
7_OCR_99293_lociStitched	chr7	25989853	26006824	7	4475	49599.4	10024.8	788	0.0694442	Treg	IK	Zfp526	0	IK_CKO_Treg|WT_Treg
5_OCR_49451_lociStitched	chr17	25409371	25426056	5	2504	46457.7	6912.6	789	0.0693923	Treg	IK	Ube2i	0	IK_CKO_Naive|IK_CKO_Treg|WT_Naive|WT_Treg
13_OCR_21419_lociStitched	chr11	117096557	117129043	13	5782	53390.7	13946.2	790	0.0692157	Treg	IK	2021-09-09	0	IK_CKO_Treg|WT_Treg
14_OCR_99646_lociStitched	chr7	31202821	31239629	14	8007	56423	17042.1	791	0.0691041	Treg	IK	Kirrel2	0	IK_CKO_Naive|IK_CKO_Treg|WT_Naive|WT_Treg
5_OCR_72960_lociStitched	chr3	90049286	90070538	5	4388	52088.7	12874.5	792	0.0688116	Treg	IK	Dennd4b	0	IK_CKO_Naive|IK_CKO_Treg|WT_Naive|WT_Treg
3_OCR_92416_lociStitched	chr6	38500696	38507735	3	2007	44565.3	5366.53	793	0.0687846	Treg	IK	Luc7l2	0	IK_CKO_Naive|IK_CKO_Treg|WT_Naive|WT_Treg
19_OCR_96675_lociStitched	chr6	124633612	124732873	19	14202	76778.4	37629.8	794	0.0686964	Treg	IK	Lrrc23	0	IK_CKO_Naive|IK_CKO_Treg|WT_Naive|WT_Treg
9_OCR_17513_lociStitched	chr11	44332060	44360427	9	7571	47242.4	8129.98	795	0.068633	Treg	IK	Rnf145	0	IK_CKO_Naive|IK_CKO_Treg|WT_Naive|WT_Treg
6_OCR_66191_lociStitched	chr2	129000195	129025065	6	4107	46651.1	7622.65	796	0.0684857	Treg	IK	Slc20a1	0	IK_CKO_Naive|IK_CKO_Treg|WT_Naive|WT_Treg
25_OCR_82519_lociStitched	chr4	134612285	134715303	25	11766	82692.5	43689.9	797	0.0684403	Treg	IK	Runx3	0	IK_CKO_Treg|WT_Treg
6_OCR_117489_lociStitched	chrX	71489064	71500956	6	3742	43774.5	4838.85	798	0.0683227	Treg	IK	Emd	0	IK_CKO_Treg|WT_Treg
1_OCR_57536_lociStitched	chr19	3767374	3769275	1	1902	45511.8	6635.44	799	0.0682189	Treg	IK	Suv420h1	0	IK_CKO_Naive|IK_CKO_Treg|WT_Naive|WT_Treg
10_OCR_56078_lociStitched	chr18	65456669	65488649	10	5305	44321.1	5449.39	800	0.0682106	Treg	IK	F730048M01Rik	0	IK_CKO_Treg|WT_Treg
10_OCR_95159_lociStitched	chr6	97155128	97185591	10	6322	46020.5	7189.27	801	0.0681395	Treg	IK	Arl6ip5	0	IK_CKO_Naive|IK_CKO_Treg|WT_Naive|WT_Treg
4_OCR_71252_lociStitched	chr3	51343553	51366146	4	5870	46993.4	8187.7	802	0.0680949	Treg	IK	5031434O11Rik	0	IK_CKO_Naive|IK_CKO_Treg|WT_Naive|WT_Treg
5_OCR_42094_lociStitched	chr15	81337666	81354116	5	3897	44832.8	6032.22	803	0.0680859	Treg	IK	Gm5218	7687	IK_CKO_Naive|IK_CKO_Treg|WT_Naive|WT_Treg
8_OCR_91524_lociStitched	chr6	17005715	17037895	8	3734	44215.3	5425.55	804	0.0680668	Treg	IK	Tes	0	IK_CKO_Naive|IK_CKO_Treg|WT_Naive|WT_Treg
4_OCR_13104_lociStitched	chr10	82085213	82096030	4	3384	45105.8	6327.94	805	0.0680459	Treg	IK	Tdg	0	IK_CKO_Naive|IK_CKO_Treg|WT_Naive|WT_Treg
8_OCR_50375_lociStitched	chr17	36130483	36140585	8	2875	41723.3	2985.14	806	0.0679762	Treg	IK	Gm17414	0	IK_CKO_Treg|WT_Treg
3_OCR_110205_lociStitched	chr8	118220487	118232379	3	3214	44120.5	5406.1	807	0.0679346	Treg	IK	Gm15655	0	IK_CKO_Treg|WT_Treg
6_OCR_4682_lociStitched	chr1	127309043	127338848	6	4036	44564.4	5898.41	808	0.0678497	Treg	IK	Actr3	0	IK_CKO_Naive|IK_CKO_Treg|WT_Naive|WT_Treg
12_OCR_96460_lociStitched	chr6	120402978	120444297	12	8117	55788.9	17126.7	809	0.067843	Treg	IK	Cecr6	0	IK_CKO_Naive|IK_CKO_Treg|WT_Naive|WT_Treg
6_OCR_43407_lociStitched	chr15	102206989	102237387	6	4812	48940.8	10323.2	810	0.0677648	Treg	IK	Sp1	0	IK_CKO_Naive|IK_CKO_Treg|WT_Naive|WT_Treg
9_OCR_18200_lociStitched	chr11	57821805	57852850	9	5627	46018	7419.76	811	0.0677308	Treg	IK	Larp1	0	IK_CKO_Treg|WT_Treg
13_OCR_43987_lociStitched	chr16	10655412	10704497	13	8544	47769.5	9223.07	812	0.0676399	Treg	IK	Gm15558	0	IK_CKO_Treg|WT_Treg
13_OCR_3919_lociStitched	chr1	97520743	97571123	13	7826	43029.6	4599.69	813	0.0674353	Treg	IK	St8sia4	0	IK_CKO_Naive|IK_CKO_Treg|WT_Naive|WT_Treg
2_OCR_83959_lociStitched	chr4	154974541	154976468	2	1755	43502.4	5086.7	814	0.0674104	Treg	IK	Slc35e2	0	IK_CKO_Naive|IK_CKO_Treg|WT_Naive|WT_Treg
3_OCR_99099_lociStitched	chr7	20204266	20220995	3	2677	48102.6	9746.32	815	0.0673061	Treg	IK	Relb	0	IK_CKO_Naive|IK_CKO_Treg|WT_Naive|WT_Treg
10_OCR_61797_lociStitched	chr2	35300597	35321542	10	5337	44068.3	5774.54	816	0.0671964	Treg	IK	Ggta1	0	IK_CKO_Treg|WT_Treg
7_OCR_88628_lociStitched	chr5	114423180	114450249	7	5597	48583.4	10326.8	817	0.0671313	Treg	IK	Ssh1	0	IK_CKO_Treg
12_OCR_26324_lociStitched	chr12	107248154	107294460	12	6171	47449.8	9210.26	818	0.0671012	Treg	IK	Vrk1	0	IK_CKO_Treg|WT_Treg
8_OCR_21287_lociStitched	chr11	115550590	115584205	8	4304	47420.7	9247.49	819	0.0669849	Treg	IK	Grb2	0	IK_CKO_Treg|WT_Treg
9_OCR_61123_lociStitched	chr2	26338538	26363356	9	5789	52542.2	14377.1	820	0.0669707	Treg	IK	Notch1	0	IK_CKO_Treg|WT_Treg
6_OCR_77001_lociStitched	chr4	8764538	8784972	6	3232	45706.8	7564.67	821	0.0669303	Treg	IK	Chd7	0	IK_CKO_Treg|WT_Treg
7_OCR_1574_lociStitched	chr1	51505418	51535727	7	4389	43199.4	5064.63	822	0.0669175	Treg	IK	Obfc2a	0	IK_CKO_Treg|WT_Treg
14_OCR_105000_lociStitched	chr7	147116522	147181067	14	8326	58568.1	20467.2	823	0.0668581	Treg	IK	Adam8	0	IK_CKO_Treg|WT_Treg
11_OCR_28358_lociStitched	chr13	23824399	23855876	11	7632	52314.8	14255.9	824	0.0667842	Treg	IK	Hist1h1a	0	IK_CKO_Naive|IK_CKO_Treg|WT_Naive|WT_Treg
15_OCR_29233_lociStitched	chr13	43835064	43886921	15	8355	47817.3	9764.67	825	0.0667734	Treg	IK	Cd83	0	IK_CKO_Treg|WT_Treg
3_OCR_17728_lociStitched	chr11	49057123	49064551	3	2556	43975.2	5949.09	826	0.0667269	Treg	IK	Mgat1	0	IK_CKO_Treg|WT_Treg
5_OCR_83955_lociStitched	chr4	154933681	154956881	5	2666	46346.6	8326.48	827	0.0667164	Treg	IK	Nadk	0	IK_CKO_Treg|WT_Treg
3_OCR_108130_lociStitched	chr8	74655818	74661098	3	2503	43244.3	5285.81	828	0.0666081	Treg	IK	Tpm4	0	IK_CKO_Naive|IK_CKO_Treg|WT_Naive|WT_Treg
27_OCR_71750_lociStitched	chr3	60356803	60420375	27	11402	42300.8	4354.68	829	0.0665864	Treg	IK	Mbnl1	23731	IK_CKO_Treg|WT_Treg
5_OCR_16201_lociStitched	chr11	6078651	6100748	5	4052	42815.1	5051.37	830	0.0662665	Treg	IK	Gm11969	0	IK_CKO_Treg|WT_Treg
10_OCR_23798_lociStitched	chr12	52906645	52931313	10	5499	44663.9	6924.31	831	0.066224	Treg	IK	Hectd1	0	IK_CKO_Naive|IK_CKO_Treg|WT_Naive|WT_Treg
10_OCR_96867_lociStitched	chr6	127092131	127128396	10	4846	49784.6	12065.4	832	0.0661883	Treg	IK	9330179D12Rik	0	IK_CKO_Naive|IK_CKO_Treg|WT_Naive|WT_Treg
6_OCR_1960_lociStitched	chr1	58851593	58863817	6	4063	41047	3342.04	833	0.0661632	Treg	IK	Casp8	0	IK_CKO_Naive|IK_CKO_Treg|WT_Naive|WT_Treg
19_OCR_14532_lociStitched	chr10	107592098	107646807	19	9266	46453.4	8769.85	834	0.0661257	Treg	IK	Ppp1r12a	0	IK_CKO_Treg|WT_Treg
2_OCR_90684_lociStitched	chr5	148229689	148243413	2	3204	45379.8	7706.03	835	0.0661085	Treg	IK	Pan3	0	IK_CKO_Naive|IK_CKO_Treg|WT_Naive|WT_Treg
13_OCR_18275_lociStitched	chr11	58976521	59052720	13	8607	64601.5	26982.1	836	0.0660132	Treg	IK	Arf1	0	IK_CKO_Naive|IK_CKO_Treg|WT_Naive|WT_Treg
3_OCR_80979_lociStitched	chr4	108131132	108144553	3	2425	44349.7	6762.84	837	0.065956	Treg	IK	U6	0	IK_CKO_Naive|IK_CKO_Treg|WT_Naive|WT_Treg
9_OCR_46402_lociStitched	chr16	55947794	55975394	9	5786	46337.6	8815.44	838	0.0658426	Treg	IK	Rpl24	0	IK_CKO_Naive|IK_CKO_Treg|WT_Naive|WT_Treg
5_OCR_102291_lociStitched	chr7	97277783	97299154	5	3671	42870.2	5351.3	839	0.0658368	Treg	IK	Picalm	0	IK_CKO_Naive|IK_CKO_Treg|WT_Naive|WT_Treg
14_OCR_53505_lociStitched	chr18	6456217	6501847	14	6953	45338	7820.98	840	0.0658334	Treg	IK	Mir1893	0	IK_CKO_Naive|IK_CKO_Treg|WT_Naive|WT_Treg
3_OCR_72952_lociStitched	chr3	89883152	89890380	3	2111	41161.3	3748.44	841	0.0656507	Treg	IK	Tpm3	0	IK_CKO_Treg|WT_Naive|WT_Treg
13_OCR_12984_lociStitched	chr10	80625117	80666413	13	7203	63699.1	26313.8	842	0.0656023	Treg	IK	Itgb1bp3	0	IK_CKO_Naive|IK_CKO_Treg|WT_Naive|WT_Treg
11_OCR_18063_lociStitched	chr11	54554804	54601775	11	6110	44350	7050.35	843	0.0654521	Treg	IK	Gm12229	0	IK_CKO_Treg|WT_Naive|WT_Treg
14_OCR_64356_lociStitched	chr2	90368240	90424552	14	7792	47656.8	10423.4	844	0.0653359	Treg	IK	Ptprj	0	IK_CKO_Treg
5_OCR_117764_lociStitched	chrX	98925426	98933094	5	2071	39316.9	2111	845	0.0652875	Treg	IK	Cxcr3	0	IK_CKO_Treg|WT_Treg
5_OCR_99341_lociStitched	chr7	26490771	26504498	5	3677	45417.2	8212.86	846	0.0652847	Treg	IK	Ccdc97	0	IK_CKO_Treg|WT_Treg
17_OCR_12797_lociStitched	chr10	79316548	79400322	17	11859	96733.8	59638.7	847	0.0650931	Treg	IK	Arid3a	0	IK_CKO_Naive|IK_CKO_Treg|WT_Naive|WT_Treg
5_OCR_2265_lociStitched	chr1	63159322	63177902	5	4886	42423.7	5373.34	848	0.0650146	Treg	IK	Gm11602	0	IK_CKO_Naive|IK_CKO_Treg|WT_Naive|WT_Treg
7_OCR_67610_lociStitched	chr2	153037206	153067808	7	5078	46903.7	9887.51	849	0.0649546	Treg	IK	Pofut1	0	IK_CKO_Treg|WT_Treg
10_OCR_19608_lociStitched	chr11	86620446	86653847	10	6935	43935.7	7010.87	850	0.0647943	Treg	IK	AL596111.1	0	IK_CKO_Naive|IK_CKO_Treg|WT_Naive|WT_Treg
11_OCR_68927_lociStitched	chr2	172195616	172241824	11	6224	50583.9	13663.7	851	0.0647862	Treg	IK	Cass4	0	IK_CKO_Treg|WT_Treg
7_OCR_49394_lociStitched	chr17	24590281	24626422	7	5761	53492.3	16599.6	852	0.064738	Treg	IK	Caskin1	0	IK_CKO_Treg|WT_Treg
7_OCR_73672_lociStitched	chr3	103576773	103614039	7	6697	46847.1	9964.93	853	0.0647194	Treg	IK	Ap4b1	0	IK_CKO_Naive|IK_CKO_Treg|WT_Naive|WT_Treg
9_OCR_35999_lociStitched	chr14	62266328	62317919	9	6229	52137.9	15265.8	854	0.0647018	Treg	IK	Dleu2	0	IK_CKO_Treg
9_OCR_60972_lociStitched	chr2	24240174	24265280	9	5086	43036.7	6198.67	855	0.064642	Treg	IK	Psd4	0	IK_CKO_Naive|IK_CKO_Treg|WT_Treg
11_OCR_32682_lociStitched	chr13	110597634	110636008	11	6193	40576.7	3752.98	856	0.0646168	Treg	IK	Pde4d	50204	IK_CKO_Naive|IK_CKO_Treg|WT_Naive|WT_Treg
10_OCR_29591_lociStitched	chr13	51183397	51215399	10	4999	43778.7	6963.64	857	0.0646018	Treg	IK	Spin1	0	IK_CKO_Treg|WT_Treg
7_OCR_5273_lociStitched	chr1	137024531	137051594	7	5237	48894.7	12097.2	858	0.064571	Treg	IK	Arl8a	0	IK_CKO_Treg|WT_Treg
16_OCR_73135_lociStitched	chr3	94904814	94992141	16	10488	62115.7	25359.8	859	0.0644979	Treg	IK	Sema6c	0	IK_CKO_Naive|IK_CKO_Treg|WT_Naive|WT_Treg
10_OCR_32693_lociStitched	chr13	110681936	110725097	10	5104	45111.9	8386.18	860	0.0644449	Treg	IK	Pde4d	0	IK_CKO_Naive|IK_CKO_Treg|WT_Naive|WT_Treg
6_OCR_73284_lociStitched	chr3	96291588	96307296	6	4703	42231	5518.22	861	0.0644221	Treg	IK	U1	0	IK_CKO_Naive|IK_CKO_Treg|WT_Naive|WT_Treg
12_OCR_59300_lociStitched	chr19	46662296	46720557	12	6276	54613.9	17961.9	862	0.0643156	Treg	IK	D19Wsu162e	0	IK_CKO_Naive|IK_CKO_Treg|WT_Naive|WT_Treg
10_OCR_77740_lociStitched	chr4	32213452	32267258	10	6310	43878.8	7279.95	863	0.0642223	Treg	IK	Gm11928	0	IK_CKO_Naive|IK_CKO_Treg|WT_Naive|WT_Treg
6_OCR_14843_lociStitched	chr10	114821160	114851463	6	4011	42742.4	6145.45	864	0.0642189	Treg	IK	Zfc3h1	0	IK_CKO_Treg|WT_Treg
14_OCR_53441_lociStitched	chr18	5591138	5632189	14	7379	45152	8575.55	865	0.064183	Treg	IK	AC127028.1	0	IK_CKO_Naive|IK_CKO_Treg|WT_Naive|WT_Treg
3_OCR_20255_lociStitched	chr11	98406951	98424690	3	2709	43057.9	6510.21	866	0.0641325	Treg	IK	Zpbp2	0	IK_CKO_Treg|WT_Naive|WT_Treg
9_OCR_29836_lociStitched	chr13	55505888	55551734	9	6869	52988.8	16527.5	867	0.063981	Treg	IK	Grk6	0	IK_CKO_Naive|IK_CKO_Treg|WT_Naive|WT_Treg
3_OCR_18379_lociStitched	chr11	60740795	60749395	3	1759	42042	5599.46	868	0.0639479	Treg	IK	Map2k3	0	IK_CKO_Treg|WT_Treg
7_OCR_102754_lociStitched	chr7	107641279	107669645	7	4197	46713.1	10291.2	869	0.0639119	Treg	IK	Dnajb13	0	IK_CKO_Naive|IK_CKO_Treg|WT_Treg
14_OCR_63998_lociStitched	chr2	79067650	79112616	14	7920	41296.8	4896.8	870	0.0638733	Treg	IK	Itga4	0	IK_CKO_Naive|IK_CKO_Treg|WT_Naive|WT_Treg
9_OCR_83968_lociStitched	chr4	155027644	155080087	9	6375	58757.1	22424.6	871	0.0637549	Treg	IK	Ssu72	0	IK_CKO_Naive|IK_CKO_Treg|WT_Naive|WT_Treg
23_OCR_107567_lociStitched	chr8	63697289	63801203	23	14823	51593.3	15316.9	872	0.0636564	Treg	IK	Sh3rf1	0	IK_CKO_Treg|WT_Treg
7_OCR_19704_lociStitched	chr11	87860560	87887332	7	4826	47086.6	10815.9	873	0.0636465	Treg	IK	Vezf1	0	IK_CKO_Naive|IK_CKO_Treg|WT_Naive|WT_Treg
13_OCR_91218_lociStitched	chr6	8434725	8482121	13	8290	43940.8	7730.29	874	0.0635409	Treg	IK	Glcci1	0	IK_CKO_Naive|IK_CKO_Treg|WT_Naive|WT_Treg
3_OCR_15452_lociStitched	chr10	122412841	122425114	3	2529	42718.6	6516.96	875	0.0635253	Treg	IK	Mirlet7i	0	IK_CKO_Naive|IK_CKO_Treg|WT_Naive|WT_Treg
17_OCR_15308_lociStitched	chr10	120689929	120753928	17	11372	51903.2	15724.6	876	0.0634849	Treg	IK	Tbc1d30	0	IK_CKO_Treg|WT_Treg
7_OCR_15793_lociStitched	chr10	127519866	127534609	7	4010	45830.1	9665.51	877	0.0634603	Treg	IK	Baz2a	0	IK_CKO_Naive|IK_CKO_Treg|WT_Naive|WT_Treg
13_OCR_37662_lociStitched	chr14	103432289	103499326	13	9277	49392.9	13293.4	878	0.0633459	Treg	IK	Fbxl3	0	IK_CKO_Naive|IK_CKO_Treg|WT_Naive|WT_Treg
2_OCR_16128_lociStitched	chr11	4991810	5000222	2	1866	42216.5	6156.74	879	0.0632762	Treg	IK	Rhbdd3	0	IK_CKO_Naive|IK_CKO_Treg|WT_Naive|WT_Treg
8_OCR_53848_lociStitched	chr18	14812207	14843933	8	6134	46231.1	10203.1	880	0.0632207	Treg	IK	Ss18	0	IK_CKO_Naive|IK_CKO_Treg|WT_Naive|WT_Treg
24_OCR_33136_lociStitched	chr13	117984424	118078949	24	13429	47517.7	11598.2	881	0.0630302	Treg	IK	Emb	0	IK_CKO_Naive|IK_CKO_Treg|WT_Naive|WT_Treg
7_OCR_7336_lociStitched	chr1	173845731	173870084	7	4863	38857.6	2944.28	882	0.0630194	Treg	IK	Slamf6	0	IK_CKO_Naive|IK_CKO_Treg|WT_Naive|WT_Treg
9_OCR_73521_lociStitched	chr3	101027927	101049516	9	3677	40099.4	4207.7	883	0.0629814	Treg	IK	Tpt1-ps1	0	IK_CKO_Treg|WT_Treg
4_OCR_57559_lociStitched	chr19	4093679	4100123	4	2215	42178.6	6287.41	884	0.0629804	Treg	IK	Pitpnm1	0	IK_CKO_Treg|WT_Treg
8_OCR_59233_lociStitched	chr19	45846058	45890912	8	6741	49980.8	14111.1	885	0.0629429	Treg	IK	Kcnip2	0	IK_CKO_Naive|IK_CKO_Treg|WT_Naive|WT_Treg
15_OCR_107974_lociStitched	chr8	73000353	73084321	15	9242	78879.5	43025.2	886	0.0629158	Treg	IK	Ell	0	IK_CKO_Naive|IK_CKO_Treg|WT_Treg
4_OCR_102874_lociStitched	chr7	109097572	109119941	4	2673	41890.4	6048.58	887	0.0628939	Treg	IK	Numa1	0	IK_CKO_Naive|IK_CKO_Treg|WT_Naive|WT_Treg
6_OCR_18195_lociStitched	chr11	57764503	57780391	6	3852	39712.1	3887.79	888	0.0628631	Treg	IK	Gm12245	1915	IK_CKO_Treg|WT_Treg
4_OCR_26346_lociStitched	chr12	107546761	107551617	4	2811	38145.3	2380.9	889	0.0627581	Treg	IK	Gm17032	13960	IK_CKO_Treg|WT_Treg
9_OCR_60681_lociStitched	chr2	17947628	17987757	9	9553	57773.7	22038.8	890	0.0627062	Treg	IK	Mllt10	0	IK_CKO_Naive|IK_CKO_Treg|WT_Naive|WT_Treg
16_OCR_11103_lociStitched	chr10	44119767	44180209	16	8466	46896.9	11224.1	891	0.0625974	Treg	IK	Prdm1	0	IK_CKO_Treg|WT_Treg
8_OCR_118571_lociStitched	chrX	163636467	163651022	8	3515	38169	2502	892	0.0625872	Treg	IK	Tmsb4x	0	IK_CKO_Treg|WT_Treg
6_OCR_26525_lociStitched	chr12	110030366	110049835	6	3198	44256.9	8683.17	893	0.0624235	Treg	IK	Yy1	0	IK_CKO_Naive|IK_CKO_Treg|WT_Naive|WT_Treg
5_OCR_89185_lociStitched	chr5	122821712	122851652	5	4164	45404	9913.13	894	0.0622781	Treg	IK	Arpc3	0	IK_CKO_Naive|IK_CKO_Treg|WT_Treg
1_OCR_29826_lociStitched	chr13	55311935	55314171	1	2237	41878.5	6483.28	895	0.0621102	Treg	IK	Nsd1	0	IK_CKO_Treg|WT_Treg
4_OCR_16934_lociStitched	chr11	23155147	23172529	4	2332	41108.4	5748.23	896	0.0620488	Treg	IK	Xpo1	0	IK_CKO_Treg|WT_Treg
7_OCR_45768_lociStitched	chr16	44762018	44781181	7	4049	37582.5	2255.49	897	0.0619905	Treg	IK	Cd200r1	0	IK_CKO_Treg|WT_Treg
24_OCR_63947_lociStitched	chr2	78799659	78850572	24	10205	38902.6	3584.28	898	0.0619753	Treg	IK	Gm14466	12855	IK_CKO_Treg|WT_Treg
15_OCR_98639_lociStitched	chr7	4947172	5014468	15	10024	71004	35693.8	899	0.061961	Treg	IK	U2af2	0	IK_CKO_Naive|IK_CKO_Treg|WT_Naive|WT_Treg
8_OCR_29133_lociStitched	chr13	42144363	42173511	8	4542	45083.2	9773.32	900	0.0619605	Treg	IK	Hivep1	0	IK_CKO_Naive|IK_CKO_Treg|WT_Treg
4_OCR_87527_lociStitched	chr5	96590123	96606606	4	4605	41975.6	6675.61	901	0.0619431	Treg	IK	Cnot6l	0	IK_CKO_Naive|IK_CKO_Treg|WT_Naive|WT_Treg
14_OCR_91659_lociStitched	chr6	22275247	22335749	14	9386	44136.2	8942.2	902	0.0617571	Treg	IK	Fam3c	0	IK_CKO_Naive|IK_CKO_Treg|WT_Naive|WT_Treg
9_OCR_13905_lociStitched	chr10	94745915	94787115	9	5525	45637.2	10567.8	903	0.0615385	Treg	IK	Cradd	0	IK_CKO_Treg
19_OCR_81604_lociStitched	chr4	120642274	120729596	19	12268	52890.9	17927.2	904	0.061353	Treg	IK	Col9a2	0	IK_CKO_Naive|IK_CKO_Treg|WT_Naive|WT_Treg
18_OCR_64836_lociStitched	chr2	102689045	102753755	18	10848	40133.1	5176.8	905	0.0613401	Treg	IK	U6	0	IK_CKO_Treg|WT_Treg
21_OCR_74179_lociStitched	chr3	115636215	115711434	21	10421	47049.5	12102.7	906	0.0613232	Treg	IK	Extl2	0	IK_CKO_Naive|IK_CKO_Treg|WT_Naive|WT_Treg
14_OCR_93911_lociStitched	chr6	70740931	70795134	14	10105	46012.9	11084.5	907	0.0612911	Treg	IK	Eif2ak3	0	IK_CKO_Naive|IK_CKO_Treg|WT_Naive|WT_Treg
6_OCR_34738_lociStitched	chr14	32469681	32483564	6	4047	40439.8	5646.22	908	0.0610545	Treg	IK	Hacl1	15208	IK_CKO_Treg
12_OCR_21733_lociStitched	chr11	120459237	120505390	12	7887	63335.8	28564.1	909	0.061016	Treg	IK	Pycr1	0	IK_CKO_Treg|WT_Treg
8_OCR_59439_lociStitched	chr19	53374348	53416585	8	5254	50545	15826.2	910	0.0609233	Treg	IK	Mxi1	0	IK_CKO_Treg|WT_Treg
10_OCR_29735_lociStitched	chr13	53056415	53078497	10	5117	43033.4	8439.74	911	0.0607037	Treg	IK	Nfil3	0	IK_CKO_Treg|WT_Treg
[truncated: 3,260 more rows]

## Sheet: unique to WT Treg
REGION_ID	CHROM	START	STOP	NUM_LOCI	CONSTITUENT_SIZE	H3K27Ac	input	enhancerRank	h3k27ac_score	cell	geno	gene_name	distance	cell_specificity
12_OCR_118628_lociStitched	chrX	166410845	166446873	12	6069	60656.7	21411.4	731	0.0684341	Treg	WT	Gm15247	0	WT_Treg
10_OCR_1581_lociStitched	chr1	51556050	51596213	10	4609	40544.5	3775.32	783	0.0641164	Treg	WT	Obfc2a	20806	WT_Treg
8_OCR_51696_lociStitched	chr17	66278592	66311615	8	4922	41070.7	9847.46	913	0.0544456	Treg	WT	Twsg1	0	WT_Treg
13_OCR_2153_lociStitched	chr1	61073417	61112301	13	5882	31970.4	2033.63	950	0.0522023	Treg	WT	Rpl17-ps1	20189	WT_Treg
12_OCR_6067_lociStitched	chr1	153508043	153573150	12	6126	36108.3	8014.67	1013	0.0489884	Treg	WT	Fam129a	0	WT_Treg
9_OCR_107186_lociStitched	chr8	47913796	47967144	9	5820	32915.7	5174.76	1025	0.0483733	Treg	WT	Irf2	88696	WT_Treg
6_OCR_48443_lociStitched	chr17	5795432	5805840	6	3542	30336.2	2719.61	1028	0.0481565	Treg	WT	Gm10231	10799	WT_Treg
11_OCR_32311_lociStitched	chr13	105075089	105098597	11	4177	28853.7	1847.73	1053	0.0470917	Treg	WT	Adamts6	0	WT_Treg
7_OCR_101724_lociStitched	chr7	85863907	85883227	7	3440	28450.6	2219.87	1071	0.0457399	Treg	WT	Mrpl46	44724	WT_Treg
9_OCR_73853_lociStitched	chr3	106571424	106593270	9	3803	27840.5	1889.68	1082	0.0452519	Treg	WT	Cd53	0	WT_Treg
8_OCR_84228_lociStitched	chr5	8648057	8681618	8	7399	30345.9	4416.63	1084	0.0452141	Treg	WT	Abcb1a	0	WT_Treg
11_OCR_13659_lociStitched	chr10	92532078	92587539	11	5767	30925.1	5307.62	1099	0.0446704	Treg	WT	Gm872	0	WT_Treg
8_OCR_24448_lociStitched	chr12	72131132	72152298	8	4093	27970.9	2431.97	1103	0.0445335	Treg	WT	Arid4a	0	WT_Treg
6_OCR_59089_lociStitched	chr19	43592798	43605887	6	3067	29701.6	4663.61	1119	0.04366	Treg	WT	Got1	0	WT_Treg
12_OCR_31213_lociStitched	chr13	85615917	85659489	12	7976	28666	3734.12	1125	0.043475	Treg	WT	Rasa1	186825	WT_Treg
14_OCR_28376_lociStitched	chr13	24573588	24641230	14	8809	31730.9	6899.48	1128	0.0432998	Treg	WT	U6	0	WT_Treg
11_OCR_42057_lociStitched	chr15	80894717	80943347	11	4862	29640	5028.34	1140	0.0429166	Treg	WT	Mkl1	0	WT_Treg
7_OCR_70479_lociStitched	chr3	30491280	30510290	7	4267	33180.1	8700.88	1145	0.0426856	Treg	WT	Mynn	0	WT_Treg
3_OCR_116609_lociStitched	chr9	123744715	123761423	3	2951	27661.8	3361.65	1158	0.0423734	Treg	WT	Fyco1	0	WT_Treg
7_OCR_82264_lociStitched	chr4	132184720	132215847	7	4584	30308.4	6085.33	1161	0.042239	Treg	WT	Eya3	0	WT_Treg
12_OCR_60209_lociStitched	chr2	9571594	9613919	12	6326	27595.9	3504.51	1169	0.0420094	Treg	WT	Gm13218	52123	WT_Treg
2_OCR_9484_lociStitched	chr10	13805016	13814583	2	2273	25697.9	1608.21	1170	0.0420065	Treg	WT	Gm8330	77804	WT_Treg
7_OCR_88418_lociStitched	chr5	111605515	111637912	7	5224	34515.8	10435.1	1171	0.0419907	Treg	WT	Ttc28	16564	WT_Treg
3_OCR_14743_lociStitched	chr10	111432851	111440189	3	2919	25406.4	1551.25	1180	0.0415974	Treg	WT	Glipr1	0	WT_Treg
3_OCR_82257_lociStitched	chr4	132140879	132144918	3	1504	25176.3	1324.39	1181	0.0415918	Treg	WT	Ptafr	20896	WT_Treg
34_OCR_57428_lociStitched	chr18	89345877	89445027	34	17381	27296	3975.91	1204	0.0406644	Treg	WT	Cd226	0	WT_Treg
3_OCR_4895_lociStitched	chr1	130720823	130729966	3	2058	25575.7	2288.49	1205	0.0406071	Treg	WT	Gm17699	49824	WT_Treg
9_OCR_18934_lociStitched	chr11	72885401	72923854	9	5436	29266.6	6225.54	1218	0.0401778	Treg	WT	Itgae	0	WT_Treg
5_OCR_116629_lociStitched	chr9	123973428	123995069	5	2718	24902.3	1884.93	1222	0.0401366	Treg	WT	Ccr2	21619	WT_Treg
12_OCR_12486_lociStitched	chr10	74845716	74910296	12	7099	31902.5	9293.06	1246	0.0394253	Treg	WT	7SK	0	WT_Treg
11_OCR_52150_lociStitched	chr17	73405006	73468895	11	5958	30826.4	8688.9	1267	0.0386024	Treg	WT	Lclat1	0	WT_Treg
2_OCR_113448_lociStitched	chr9	56265207	56273196	2	2611	26940.5	4951.58	1279	0.0383432	Treg	WT	Hmg20a	0	WT_Treg
13_OCR_107606_lociStitched	chr8	63897046	63967410	13	9953	28940.7	7036.4	1284	0.0381957	Treg	WT	Cbr4	0	WT_Treg
8_OCR_90756_lociStitched	chr5	149334784	149366670	8	4188	29182.1	7321.03	1287	0.0381202	Treg	WT	Ubl3	0	WT_Treg
8_OCR_91234_lociStitched	chr6	8567271	8616071	8	6844	27806.2	6212.24	1300	0.0376546	Treg	WT	Ica1	0	WT_Treg
13_OCR_32841_lociStitched	chr13	113048654	113108955	13	7047	27503.3	5969.8	1303	0.0375491	Treg	WT	Ankrd55	0	WT_Treg
8_OCR_93401_lociStitched	chr6	57745727	57775357	8	5391	27748.5	6317.12	1306	0.037371	Treg	WT	Vopp1	0	WT_Treg
7_OCR_51113_lociStitched	chr17	52189718	52219176	7	4049	24137.9	2730.76	1307	0.0373287	Treg	WT	Satb1	217102	WT_Treg
3_OCR_12196_lociStitched	chr10	68003445	68016817	3	2842	23389	2131.5	1315	0.0370677	Treg	WT	1700040L02Rik	0	WT_Treg
8_OCR_60458_lociStitched	chr2	13300568	13335748	8	4774	23334.9	2121.35	1320	0.0369911	Treg	WT	Cubn	41502	WT_Treg
4_OCR_74802_lociStitched	chr3	130716802	130729641	4	2745	24148.9	2940.13	1321	0.0369828	Treg	WT	AC114668.1	72824	WT_Treg
8_OCR_53352_lociStitched	chr18	3262122	3293337	8	4425	23233.3	2053.95	1322	0.0369316	Treg	WT	Crem	0	WT_Treg
10_OCR_37702_lociStitched	chr14	104048211	104078926	10	7313	29480.3	8336.05	1324	0.0368702	Treg	WT	Slain1	0	WT_Treg
4_OCR_68401_lociStitched	chr2	165775254	165782376	4	2093	23425	2292.57	1325	0.0368497	Treg	WT	Gm11462	2912	WT_Treg
10_OCR_70568_lociStitched	chr3	32295692	32337881	10	6143	28140.1	7041.34	1330	0.0367909	Treg	WT	Pik3ca	0	WT_Treg
4_OCR_19592_lociStitched	chr11	86432113	86438366	4	1708	22240.7	1173.06	1332	0.0367367	Treg	WT	Gm11478	6161	WT_Treg
17_OCR_3036_lociStitched	chr1	80599629	80676516	17	9609	24327	3283.07	1334	0.0366955	Treg	WT	Dock10	0	WT_Treg
5_OCR_22609_lociStitched	chr12	25277659	25288434	5	2779	23779.3	2829.51	1341	0.0365313	Treg	WT	Grhl1	12044	WT_Treg
11_OCR_71264_lociStitched	chr3	51438398	51477916	11	6579	28409.5	7559.79	1345	0.0363567	Treg	WT	Mgst2	0	WT_Treg
10_OCR_99478_lociStitched	chr7	29208017	29252948	10	6138	40307.6	19527	1351	0.0362362	Treg	WT	Lrfn1	0	WT_Treg
9_OCR_6780_lociStitched	chr1	164653096	164682546	9	3747	26337.1	5663.23	1361	0.0360501	Treg	WT	Prrc2c	0	WT_Treg
5_OCR_18735_lociStitched	chr11	69388818	69406191	5	2610	27421.5	6928.35	1369	0.035735	Treg	WT	Trp53	0	WT_Treg
14_OCR_42740_lociStitched	chr15	93075940	93129518	14	6351	34139.9	13667.7	1370	0.0356984	Treg	WT	Gxylt1	0	WT_Treg
10_OCR_114475_lociStitched	chr9	79607103	79664608	10	6242	28442	7993.19	1371	0.0356576	Treg	WT	4930429F24Rik	0	WT_Treg
12_OCR_112713_lociStitched	chr9	40852604	40893565	12	6557	26653.3	6389.92	1387	0.0353343	Treg	WT	Ubash3b	0	WT_Treg
5_OCR_79309_lociStitched	chr4	63584462	63609644	5	3662	21855.5	1611.65	1388	0.0353002	Treg	WT	Rpl17-ps4	27305	WT_Treg
6_OCR_12528_lociStitched	chr10	75287066	75302412	6	3463	25081.5	4923	1393	0.0351514	Treg	WT	Gstt2	0	WT_Treg
4_OCR_3231_lociStitched	chr1	87583140	87600745	4	3764	22449.9	2306.26	1394	0.0351255	Treg	WT	Sp100	0	WT_Treg
5_OCR_75443_lociStitched	chr3	142153332	142162350	5	2747	21213.9	1126.35	1397	0.0350278	Treg	WT	Gbp5	0	WT_Treg
6_OCR_103776_lociStitched	chr7	126979322	127016122	6	4430	22897	2837.28	1400	0.0349791	Treg	WT	Dcun1d3	0	WT_Treg
10_OCR_73687_lociStitched	chr3	103689746	103742074	10	6105	28173.4	8278.29	1407	0.0346921	Treg	WT	Rsbn1	0	WT_Treg
4_OCR_73080_lociStitched	chr3	93401053	93413387	4	2195	21496.9	1808.16	1416	0.0343323	Treg	WT	S100a10	36403	WT_Treg
20_OCR_67075_lociStitched	chr2	145544187	145671971	20	11594	29939.8	10286.6	1418	0.0342703	Treg	WT	Rin2	0	WT_Treg
19_OCR_6884_lociStitched	chr1	166863961	166951664	19	11113	27661.5	8068.68	1422	0.0341651	Treg	WT	Xcl1	0	WT_Treg
11_OCR_92078_lociStitched	chr6	31236082	31282640	11	5221	25001.6	5451.94	1423	0.0340898	Treg	WT	2210408F21Rik	0	WT_Treg
1_OCR_47352_lociStitched	chr16	84583528	84584808	1	1281	20901.1	1442.94	1429	0.0339302	Treg	WT	7SK	35564	WT_Treg
2_OCR_57839_lociStitched	chr19	7280284	7292595	2	2049	26365.2	6917.55	1430	0.0339119	Treg	WT	Cox8a	0	WT_Treg
10_OCR_57288_lociStitched	chr18	85020233	85059749	10	6111	24962.3	5583.61	1434	0.0337915	Treg	WT	Cyb5	0	WT_Treg
6_OCR_73067_lociStitched	chr3	93297801	93326752	6	4056	23267.9	3891.01	1435	0.0337885	Treg	WT	S100a11	0	WT_Treg
8_OCR_33801_lociStitched	chr14	17075305	17103062	8	5787	25844.5	6522.9	1439	0.0336922	Treg	WT	Ngly1	0	WT_Treg
7_OCR_81689_lociStitched	chr4	122609507	122645779	7	6214	28654.9	9372.68	1441	0.0336234	Treg	WT	4933421A08Rik	0	WT_Treg
4_OCR_21015_lociStitched	chr11	109531757	109540057	4	2124	22519.6	3312.53	1443	0.0334923	Treg	WT	Fam20a	0	WT_Treg
4_OCR_97324_lociStitched	chr6	134772945	134798505	4	2517	25409.2	6310.76	1449	0.0333029	Treg	WT	Crebl2	0	WT_Treg
11_OCR_19649_lociStitched	chr11	87256134	87285647	11	7591	28108.2	9042.78	1451	0.0332453	Treg	WT	U3	0	WT_Treg
7_OCR_75340_lociStitched	chr3	138704800	138738987	7	5736	27585.5	8580.94	1455	0.0331392	Treg	WT	Rap1gds1	0	WT_Treg
4_OCR_73260_lociStitched	chr3	96041916	96049534	4	1942	23400.2	4426.06	1457	0.0330862	Treg	WT	Hist2h3c1	0	WT_Treg
3_OCR_57687_lociStitched	chr19	5487870	5491757	3	2812	26593.7	7637.57	1460	0.0330548	Treg	WT	Cfl1	0	WT_Treg
9_OCR_91943_lociStitched	chr6	29776942	29810616	9	4084	21180.9	2225.85	1461	0.033053	Treg	WT	Ahcyl2	0	WT_Treg
6_OCR_27408_lociStitched	chr13	5822413	5846447	6	3627	20383.2	1542.98	1469	0.0328527	Treg	WT	Klf6	14287	WT_Treg
7_OCR_50997_lociStitched	chr17	50609029	50624939	7	3702	20272.5	1458.95	1470	0.0328062	Treg	WT	Plcl2	23932	WT_Treg
3_OCR_102871_lociStitched	chr7	109044461	109067014	3	2448	26788.5	8073.97	1475	0.0326334	Treg	WT	2400001E08Rik	0	WT_Treg
2_OCR_11613_lociStitched	chr10	57908655	57922956	2	1860	24444.7	5937.78	1488	0.0322715	Treg	WT	Ranbp2	0	WT_Treg
5_OCR_20898_lociStitched	chr11	108015360	108040823	5	2573	20732	2266.21	1492	0.0321997	Treg	WT	Gm11655	2340	WT_Treg
2_OCR_15813_lociStitched	chr10	127735112	127741132	2	1502	20411.4	1995.03	1495	0.0321136	Treg	WT	Pan2	0	WT_Treg
5_OCR_16074_lociStitched	chr11	4322677	4338627	5	2678	20052.3	1657.2	1498	0.0320765	Treg	WT	Hormad2	0	WT_Treg
14_OCR_11600_lociStitched	chr10	57785616	57868970	14	8639	27240.1	8860.53	1500	0.0320494	Treg	WT	Lims1	0	WT_Treg
3_OCR_50617_lociStitched	chr17	44903187	44914888	3	2405	23666.4	5341.51	1505	0.0319541	Treg	WT	Supt3h	0	WT_Treg
4_OCR_104158_lociStitched	chr7	134119368	134143507	4	2139	29843	11627.8	1515	0.0317629	Treg	WT	Cdipt	0	WT_Treg
1_OCR_7278_lociStitched	chr1	173341046	173342553	1	1508	23042	4830.69	1517	0.0317561	Treg	WT	Usf1	0	WT_Treg
3_OCR_17846_lociStitched	chr11	51569229	51577751	3	2549	25657.2	7451.64	1518	0.031746	Treg	WT	Sar1b	0	WT_Treg
8_OCR_109550_lociStitched	chr8	106762869	106777220	8	4273	24324.9	6169.49	1519	0.0316586	Treg	WT	Cklf	0	WT_Treg
5_OCR_41958_lociStitched	chr15	80046681	80064864	5	2605	26179.9	8035.07	1520	0.0316401	Treg	WT	Smcr7l	0	WT_Treg
3_OCR_17883_lociStitched	chr11	51848638	51861591	3	2530	19570.7	1436.49	1521	0.0316215	Treg	WT	Gm12205	0	WT_Treg
6_OCR_29083_lociStitched	chr13	41440873	41477696	6	5237	23073.3	4941.65	1522	0.0316171	Treg	WT	Gm17260	0	WT_Treg
4_OCR_11671_lociStitched	chr10	59025215	59053414	4	5380	21764	3702.53	1527	0.0314947	Treg	WT	Gm10322	25396	WT_Treg
16_OCR_103659_lociStitched	chr7	124572136	124665321	16	9908	28887.3	10837.4	1528	0.0314746	Treg	WT	Xylt1	0	WT_Treg
6_OCR_74221_lociStitched	chr3	116117262	116145166	6	6169	23891.4	5884.95	1531	0.0313988	Treg	WT	Cdc14a	0	WT_Treg
8_OCR_49773_lociStitched	chr17	29374650	29418071	8	4268	38297.3	20347.1	1532	0.0313008	Treg	WT	BC004004	0	WT_Treg
1_OCR_20766_lociStitched	chr11	106077352	106078945	1	1594	22949.9	5016.83	1536	0.0312708	Treg	WT	Ddx42	0	WT_Treg
2_OCR_67865_lociStitched	chr2	157026721	157030813	2	2234	22968	5082.67	1540	0.0311875	Treg	WT	Rbl1	0	WT_Treg
4_OCR_42564_lociStitched	chr15	89139986	89154892	4	2476	26735.4	8857.15	1541	0.0311752	Treg	WT	Adm2	0	WT_Treg
6_OCR_110147_lociStitched	chr8	117495189	117510412	6	3511	21217.8	3361.24	1542	0.0311374	Treg	WT	5S_rRNA	66400	WT_Treg
4_OCR_68224_lociStitched	chr2	163458533	163471182	4	2077	22940.2	5088.69	1544	0.0311286	Treg	WT	0610039K10Rik	0	WT_Treg
7_OCR_45296_lociStitched	chr16	33739956	33756441	7	2820	21171.7	3357.99	1545	0.0310627	Treg	WT	Heg1	0	WT_Treg

## Sheet: unique to Ik cko Treg
REGION_ID	CHROM	START	STOP	NUM_LOCI	CONSTITUENT_SIZE	H3K27Ac	input	enhancerRank	h3k27ac_score	cell	geno	gene_name	distance	cell_specificity
10_OCR_84826_lociStitched	chr5	23888924	23931577	10	7082	65847.7	21381.9	691	0.0780268	Treg	IK	Slc4a2	0	IK_CKO_Treg
19_OCR_36885_lociStitched	chr14	78663747	78757148	19	13430	52631.5	11497.7	750	0.0721801	Treg	IK	AC126690.2	0	IK_CKO_Treg
11_OCR_113534_lociStitched	chr9	57783567	57822429	11	5803	56870.7	16294.8	766	0.0712009	Treg	IK	Sema7a	0	IK_CKO_Treg
7_OCR_88628_lociStitched	chr5	114423180	114450249	7	5597	48583.4	10326.8	817	0.0671313	Treg	IK	Ssh1	0	IK_CKO_Treg
14_OCR_64356_lociStitched	chr2	90368240	90424552	14	7792	47656.8	10423.4	844	0.0653359	Treg	IK	Ptprj	0	IK_CKO_Treg
9_OCR_35999_lociStitched	chr14	62266328	62317919	9	6229	52137.9	15265.8	854	0.0647018	Treg	IK	Dleu2	0	IK_CKO_Treg
9_OCR_13905_lociStitched	chr10	94745915	94787115	9	5525	45637.2	10567.8	903	0.0615385	Treg	IK	Cradd	0	IK_CKO_Treg
6_OCR_34738_lociStitched	chr14	32469681	32483564	6	4047	40439.8	5646.22	908	0.0610545	Treg	IK	Hacl1	15208	IK_CKO_Treg
14_OCR_73372_lociStitched	chr3	97732915	97777276	14	7145	40958.5	6849.34	923	0.0598535	Treg	IK	Gm5544	0	IK_CKO_Treg
12_OCR_45531_lociStitched	chr16	38341509	38379551	12	5808	42363.6	9194.75	956	0.0582034	Treg	IK	Popdc2	0	IK_CKO_Treg
4_OCR_108649_lociStitched	chr8	86650748	86672370	4	3179	45010.5	11889.9	959	0.0581188	Treg	IK	4930432K21Rik	0	IK_CKO_Treg
7_OCR_17781_lociStitched	chr11	50011606	50051135	7	6652	53257.4	20183.5	960	0.0580369	Treg	IK	Gm16641	0	IK_CKO_Treg
4_OCR_23988_lociStitched	chr12	56561654	56567813	4	2786	35282.4	2250.5	963	0.0579632	Treg	IK	Nfkbia	25820	IK_CKO_Treg
6_OCR_13869_lociStitched	chr10	94566532	94586130	6	3864	35339.1	3286.58	992	0.0562446	Treg	IK	7SK	155307	IK_CKO_Treg
3_OCR_34042_lociStitched	chr14	20987741	21001365	3	2631	35479.6	3689.38	1001	0.0557843	Treg	IK	Kcnk5	0	IK_CKO_Treg
24_OCR_55786_lociStitched	chr18	60865539	60949197	24	14213	56870.7	25197.8	1004	0.0555785	Treg	IK	Gm8731	0	IK_CKO_Treg
7_OCR_19894_lociStitched	chr11	94231296	94274653	7	4400	41926.2	10492.4	1012	0.0551589	Treg	IK	Cacna1g	0	IK_CKO_Treg
9_OCR_54410_lociStitched	chr18	32702191	32737244	9	5980	38025.5	6730.18	1016	0.0549159	Treg	IK	Gypc	0	IK_CKO_Treg
11_OCR_14699_lociStitched	chr10	110940204	111000092	11	7821	42592.3	11768	1031	0.0540894	Treg	IK	Phlda1	0	IK_CKO_Treg
24_OCR_80890_lociStitched	chr4	106534706	106669723	24	14216	63903.5	33497.7	1051	0.053355	Treg	IK	Ssbp3	0	IK_CKO_Treg
16_OCR_19319_lociStitched	chr11	79454129	79525635	16	10891	62932.4	32849.9	1061	0.0527878	Treg	IK	Mir193	0	IK_CKO_Treg
11_OCR_114066_lociStitched	chr9	69282957	69334401	11	6636	40522.4	10453.4	1062	0.052764	Treg	IK	Anxa2	0	IK_CKO_Treg
10_OCR_108935_lociStitched	chr8	91142489	91175465	10	5456	38370.9	9167.33	1100	0.0512453	Treg	IK	Nod2	0	IK_CKO_Treg
8_OCR_111274_lociStitched	chr8	131208534	131233492	8	4078	33251.5	4098.1	1101	0.0511574	Treg	IK	Itgb1	0	IK_CKO_Treg
9_OCR_101083_lociStitched	chr7	73320575	73346459	9	5170	35344.6	6455.47	1116	0.0506936	Treg	IK	Gm17504	2567	IK_CKO_Treg
11_OCR_101077_lociStitched	chr7	73246770	73305213	11	6365	37736.6	9239.84	1132	0.0500051	Treg	IK	U6	0	IK_CKO_Treg
3_OCR_115840_lociStitched	chr9	110575069	110588517	3	1837	32557.6	4603.25	1151	0.0490533	Treg	IK	Ccdc12	16061	IK_CKO_Treg
8_OCR_92450_lociStitched	chr6	38797938	38826931	8	4593	32701.2	5030.29	1157	0.0485559	Treg	IK	Tbxas1	0	IK_CKO_Treg
21_OCR_64444_lociStitched	chr2	91761268	91828021	21	13132	64463.4	36794.3	1158	0.0485527	Treg	IK	Gm9821	0	IK_CKO_Treg
3_OCR_71299_lociStitched	chr3	51849899	51852484	3	1777	29142.3	1479.14	1159	0.0485422	Treg	IK	Maml3	56328	IK_CKO_Treg
6_OCR_36527_lociStitched	chr14	71164924	71181657	6	5079	34520.2	6863.88	1160	0.0485302	Treg	IK	Dok2	0	IK_CKO_Treg
6_OCR_16063_lociStitched	chr11	4188875	4220139	6	3704	35450.2	8494.43	1188	0.0473011	Treg	IK	Gm11958	3411	IK_CKO_Treg
13_OCR_82734_lociStitched	chr4	137391714	137446889	13	7176	44266.9	17325	1189	0.0472767	Treg	IK	Gm13012	0	IK_CKO_Treg
33_OCR_22485_lociStitched	chr12	17643393	17815806	33	19011	56258.4	29534.3	1193	0.0468943	Treg	IK	Hpcal1	0	IK_CKO_Treg
5_OCR_61574_lociStitched	chr2	32250926	32284132	5	4178	38738.1	12146.8	1199	0.0466615	Treg	IK	Slc25a25	0	IK_CKO_Treg
10_OCR_35701_lociStitched	chr14	55697962	55741065	10	6688	42499.6	16077.4	1206	0.0463646	Treg	IK	Jph4	0	IK_CKO_Treg
2_OCR_51183_lociStitched	chr17	53617943	53628481	2	2063	30800.5	4410.15	1207	0.0463087	Treg	IK	Rab5a	0	IK_CKO_Treg
10_OCR_88779_lociStitched	chr5	115956389	115994177	10	6728	44903.5	18671.1	1217	0.0460317	Treg	IK	Pxn	0	IK_CKO_Treg
27_OCR_99137_lociStitched	chr7	20370058	20475545	27	14535	63956.8	37901.5	1226	0.0457208	Treg	IK	Ceacam19	0	IK_CKO_Treg
3_OCR_62626_lociStitched	chr2	53049960	53064215	3	2171	31368.1	5332.8	1227	0.0456858	Treg	IK	Arl6ip6	0	IK_CKO_Treg
8_OCR_51251_lociStitched	chr17	56070846	56116345	8	6139	43915.6	18067.7	1235	0.0453571	Treg	IK	Shd	0	IK_CKO_Treg
4_OCR_20803_lociStitched	chr11	106442697	106474958	4	3933	37348.6	11530.1	1236	0.0453053	Treg	IK	Tex2	0	IK_CKO_Treg
11_OCR_82269_lociStitched	chr4	132288013	132358554	11	6544	44518.4	18735.7	1237	0.0452426	Treg	IK	Gm13022	0	IK_CKO_Treg
26_OCR_70191_lociStitched	chr3	21973986	22062295	26	13055	37610.8	11904.1	1242	0.0451092	Treg	IK	Tbl1xr1	0	IK_CKO_Treg
5_OCR_59503_lociStitched	chr19	53866202	53884376	5	3658	29747.2	4238.18	1247	0.0447623	Treg	IK	Rbm20	0	IK_CKO_Treg
6_OCR_41118_lociStitched	chr15	66722411	66736276	6	3019	29727.9	4300.92	1251	0.0446184	Treg	IK	Wisp1	0	IK_CKO_Treg
7_OCR_61791_lociStitched	chr2	35253058	35279898	7	4508	30560	5266.01	1262	0.044385	Treg	IK	Ggta1	0	IK_CKO_Treg
12_OCR_110724_lociStitched	chr8	124783270	124839368	12	6013	59391	34102	1264	0.0443762	Treg	IK	Zfpm1	0	IK_CKO_Treg
6_OCR_49611_lociStitched	chr17	27671694	27703253	6	5798	44444.5	19172.1	1267	0.0443471	Treg	IK	C130040N14Rik	0	IK_CKO_Treg
11_OCR_19931_lociStitched	chr11	94819448	94871782	11	7693	45295.1	20289.9	1284	0.0438782	Treg	IK	Samd14	0	IK_CKO_Treg
10_OCR_62937_lociStitched	chr2	60683194	60719836	10	6252	30519.1	5635.54	1286	0.0436648	Treg	IK	Rbms1	0	IK_CKO_Treg
17_OCR_110602_lociStitched	chr8	123177189	123260875	17	10271	53132.2	28277.5	1289	0.0436142	Treg	IK	Irf8	0	IK_CKO_Treg
6_OCR_90099_lociStitched	chr5	137942989	137975128	6	5681	46691.5	21896.3	1291	0.0435098	Treg	IK	Gm17112	0	IK_CKO_Treg
2_OCR_40011_lociStitched	chr15	38228618	38231292	2	2386	31442.5	6711.21	1295	0.0433975	Treg	IK	Klf10	0	IK_CKO_Treg
7_OCR_107922_lociStitched	chr8	72457639	72467852	7	2614	27023.6	2392.91	1301	0.043221	Treg	IK	Gatad2a	30429	IK_CKO_Treg
10_OCR_68634_lociStitched	chr2	168341967	168386109	10	6104	41074.1	16553.2	1310	0.0430283	Treg	IK	Nfatc2	0	IK_CKO_Treg
9_OCR_45289_lociStitched	chr16	33672850	33727316	9	6046	37592.4	13120.9	1315	0.0429418	Treg	IK	Heg1	0	IK_CKO_Treg
7_OCR_19166_lociStitched	chr11	77596949	77616466	7	4948	30868.1	6471.84	1320	0.0428096	Treg	IK	Myo18a	0	IK_CKO_Treg
4_OCR_20662_lociStitched	chr11	103536931	103559605	4	1852	29526.1	5149.27	1321	0.0427755	Treg	IK	C130046K22Rik	0	IK_CKO_Treg
15_OCR_27054_lociStitched	chr12	117493059	117566705	15	8652	34702	10362	1324	0.0427109	Treg	IK	Esyt2	0	IK_CKO_Treg
7_OCR_9105_lociStitched	chr10	7382197	7415659	7	5467	34251.7	10108.9	1332	0.0423649	Treg	IK	Lats1	0	IK_CKO_Treg
10_OCR_26758_lociStitched	chr12	113825395	113868034	10	7535	50378	26235.8	1333	0.0423638	Treg	IK	Adssl1	0	IK_CKO_Treg
3_OCR_67802_lociStitched	chr2	156131596	156150800	3	2526	30209.8	6093.43	1334	0.0423185	Treg	IK	AL929404.1	0	IK_CKO_Treg
17_OCR_11061_lociStitched	chr10	43697197	43758633	17	9140	36560.6	12526.8	1341	0.0421735	Treg	IK	Gm10812	0	IK_CKO_Treg
1_OCR_49853_lociStitched	chr17	30141046	30142809	1	1764	28616.8	4627.88	1343	0.0420949	Treg	IK	Zfand3	0	IK_CKO_Treg
6_OCR_11909_lociStitched	chr10	61775930	61803538	6	3760	34761.2	10780.9	1344	0.0420797	Treg	IK	2210417K05Rik	0	IK_CKO_Treg
4_OCR_13876_lociStitched	chr10	94602927	94610242	4	2342	26029	2105.26	1345	0.0419804	Treg	IK	Cradd	176078	IK_CKO_Treg
3_OCR_112672_lociStitched	chr9	40256461	40264033	3	2661	26767	2871.3	1346	0.0419313	Treg	IK	Gramd1b	0	IK_CKO_Treg
1_OCR_113598_lociStitched	chr9	59333510	59335049	1	1540	28334.4	4442.02	1347	0.0419254	Treg	IK	Arih1	0	IK_CKO_Treg
20_OCR_99537_lociStitched	chr7	29701550	29811727	20	11443	55165.6	31455.5	1356	0.0416056	Treg	IK	Map4k1	0	IK_CKO_Treg
8_OCR_16921_lociStitched	chr11	22856784	22891165	8	5315	31857.4	8199.87	1359	0.0415134	Treg	IK	Cct4	0	IK_CKO_Treg
12_OCR_61629_lociStitched	chr2	32690032	32738654	12	6927	40322.2	16730.8	1360	0.0413973	Treg	IK	Fam129b	0	IK_CKO_Treg
7_OCR_113200_lociStitched	chr9	50336012	50363801	7	4372	27261	3695.94	1362	0.0413511	Treg	IK	Bco2	0	IK_CKO_Treg
8_OCR_40846_lociStitched	chr15	61813034	61830725	8	3555	29409.5	5967.17	1366	0.0411357	Treg	IK	Myc	0	IK_CKO_Treg
14_OCR_39860_lociStitched	chr15	36344841	36390703	14	7643	32548.3	9108.19	1367	0.0411318	Treg	IK	Ankrd46	35842	IK_CKO_Treg
6_OCR_20097_lociStitched	chr11	97002077	97014537	6	3322	31991	8572.48	1368	0.041094	Treg	IK	Tbkbp1	0	IK_CKO_Treg
9_OCR_89371_lociStitched	chr5	124861739	124901480	9	5798	36708.8	13325.2	1371	0.0410327	Treg	IK	Setd8	0	IK_CKO_Treg
9_OCR_3002_lociStitched	chr1	80305551	80337999	9	4645	28330.3	4964.54	1374	0.0410014	Treg	IK	Cul3	0	IK_CKO_Treg
4_OCR_21663_lociStitched	chr11	119522854	119544171	4	3036	27938.1	4681.21	1380	0.0408102	Treg	IK	Rptor	5595	IK_CKO_Treg
16_OCR_72872_lociStitched	chr3	89141286	89200612	16	7563	55938.5	32730.2	1383	0.0407251	Treg	IK	Gm15417	0	IK_CKO_Treg
3_OCR_40679_lociStitched	chr15	58719947	58727277	3	2099	27618.7	4427.32	1384	0.0406954	Treg	IK	Rnf139	0	IK_CKO_Treg
5_OCR_3245_lociStitched	chr1	87689810	87710626	5	3556	27720.7	4548.3	1386	0.040662	Treg	IK	Cab39	0	IK_CKO_Treg
3_OCR_19626_lociStitched	chr11	86806476	86809401	3	1820	26690	3541.59	1388	0.04062	Treg	IK	Ypel2	0	IK_CKO_Treg
9_OCR_110569_lociStitched	chr8	123010861	123033155	9	5461	36885.4	13811.1	1392	0.0404899	Treg	IK	Gse1	0	IK_CKO_Treg
5_OCR_48859_lociStitched	chr17	13181055	13203078	5	3811	32369.4	9474.29	1403	0.0401755	Treg	IK	Sod2	0	IK_CKO_Treg
7_OCR_25212_lociStitched	chr12	86091742	86126457	7	4044	31680.9	8942.58	1409	0.0399004	Treg	IK	Isca2	0	IK_CKO_Treg
16_OCR_109357_lociStitched	chr8	97295701	97362949	16	9844	39319.9	16590.1	1410	0.0398854	Treg	IK	Coq9	0	IK_CKO_Treg
3_OCR_85362_lociStitched	chr5	34908145	34917833	3	2203	26705	3986.61	1411	0.0398653	Treg	IK	Add1	0	IK_CKO_Treg
1_OCR_19163_lociStitched	chr11	77499184	77501495	1	2312	27170.4	4522.4	1418	0.0397419	Treg	IK	Nufip2	0	IK_CKO_Treg
6_OCR_69090_lociStitched	chr2	174152634	174170073	6	4979	32638.8	10010	1419	0.0397083	Treg	IK	Gnas	0	IK_CKO_Treg
5_OCR_40021_lociStitched	chr15	38399993	38426162	5	3523	28744	6196.82	1426	0.039565	Treg	IK	Azin1	980	IK_CKO_Treg
12_OCR_108148_lociStitched	chr8	74763364	74827924	12	7667	40169.2	17689.4	1431	0.0394467	Treg	IK	Ap1m1	0	IK_CKO_Treg
4_OCR_109760_lociStitched	chr8	109814872	109834626	4	3229	27633.9	5234.81	1435	0.039305	Treg	IK	Nfat5	0	IK_CKO_Treg
3_OCR_58546_lociStitched	chr19	29492328	29506262	3	2802	24426.3	2085.92	1438	0.0392021	Treg	IK	Pdcd1lg2	6918	IK_CKO_Treg
2_OCR_98710_lociStitched	chr7	7250836	7252528	2	1632	26606.2	4321.37	1439	0.0391046	Treg	IK	AC149056.1	0	IK_CKO_Treg
9_OCR_89128_lociStitched	chr5	122261525	122299339	9	7251	43410.5	21126.7	1440	0.0391028	Treg	IK	Fam109a	0	IK_CKO_Treg
1_OCR_59524_lociStitched	chr19	54018230	54019898	1	1669	26179.1	3906.79	1441	0.0390826	Treg	IK	Shoc2	0	IK_CKO_Treg
4_OCR_114446_lociStitched	chr9	78325046	78337828	4	3087	27922.3	5650.92	1442	0.0390809	Treg	IK	Eef1a1	0	IK_CKO_Treg
1_OCR_36589_lociStitched	chr14	73108982	73110624	1	1643	25917.8	3650.82	1443	0.0390733	Treg	IK	Fndc3a	0	IK_CKO_Treg
2_OCR_103947_lociStitched	chr7	130251445	130254032	2	1490	23333.4	1078.26	1445	0.0390526	Treg	IK	Tnrc6a	13737	IK_CKO_Treg
8_OCR_94504_lociStitched	chr6	86589195	86619801	8	4059	32629.1	10421.3	1446	0.0389693	Treg	IK	Mxd1	0	IK_CKO_Treg
17_OCR_23255_lociStitched	chr12	36203687	36292716	17	8744	28489.3	6303.25	1447	0.0389312	Treg	IK	Gm17436	0	IK_CKO_Treg
6_OCR_82835_lociStitched	chr4	139153197	139179287	6	4272	32719.5	10553.4	1449	0.0388962	Treg	IK	Aldh4a1	0	IK_CKO_Treg
15_OCR_50982_lociStitched	chr17	50262736	50337034	15	11505	36569.5	14406.4	1450	0.038891	Treg	IK	Rftn1	0	IK_CKO_Treg
5_OCR_88235_lociStitched	chr5	108146593	108161122	5	3986	31789.5	9831.77	1459	0.0385305	Treg	IK	A430072P03Rik	0	IK_CKO_Treg
4_OCR_26623_lociStitched	chr12	111829067	111847304	4	2972	29624.2	7732.49	1462	0.0384147	Treg	IK	Dync1h1	0	IK_CKO_Treg
7_OCR_78402_lociStitched	chr4	46455420	46478918	7	3758	30422.9	8546.22	1463	0.0383883	Treg	IK	Anp32b	0	IK_CKO_Treg
5_OCR_43160_lociStitched	chr15	99222952	99247385	5	3275	29571.3	7735.49	1464	0.0383166	Treg	IK	Tmbim6	0	IK_CKO_Treg
3_OCR_97852_lociStitched	chr6	142701041	142706430	3	1546	25547.1	3747.51	1465	0.0382531	Treg	IK	Cmas	0	IK_CKO_Treg
14_OCR_94019_lociStitched	chr6	72294616	72365418	14	9912	41836.9	20121.9	1471	0.0381046	Treg	IK	Ggcx	0	IK_CKO_Treg
6_OCR_10773_lociStitched	chr10	39310007	39351748	6	3964	29811.4	8101.93	1472	0.038095	Treg	IK	Traf3ip2	0	IK_CKO_Treg
5_OCR_73564_lociStitched	chr3	101399933	101410065	5	2666	26859.9	5160.23	1475	0.0380778	Treg	IK	Atp1a1	0	IK_CKO_Treg
16_OCR_73740_lociStitched	chr3	104555847	104600095	16	7954	39327.6	17655	1476	0.0380304	Treg	IK	Rhoc	0	IK_CKO_Treg
10_OCR_109933_lociStitched	chr8	113443197	113479558	10	6315	30481.4	8839.36	1477	0.0379767	Treg	IK	St3gal2	0	IK_CKO_Treg
11_OCR_57894_lociStitched	chr19	8911596	8973439	11	6976	39350.7	17786	1482	0.0378408	Treg	IK	Ganab	0	IK_CKO_Treg
6_OCR_101874_lociStitched	chr7	87501157	87532263	6	4697	39087.8	17562.4	1489	0.0377719	Treg	IK	Man2a2	0	IK_CKO_Treg
6_OCR_5005_lociStitched	chr1	133156880	133187589	6	3966	29345.5	7846.15	1490	0.0377263	Treg	IK	Ikbke	0	IK_CKO_Treg
11_OCR_9809_lociStitched	chr10	19606101	19661258	11	5521	32349.6	10860.4	1492	0.0377084	Treg	IK	Map3k5	0	IK_CKO_Treg
11_OCR_38703_lociStitched	chr15	5180783	5224298	11	5699	29068	7589.02	1494	0.0376906	Treg	IK	Ptger4	0	IK_CKO_Treg
6_OCR_56259_lociStitched	chr18	68208451	68226568	6	5562	24322.1	2882.41	1498	0.0376215	Treg	IK	D18Ertd653e	115539	IK_CKO_Treg
15_OCR_61013_lociStitched	chr2	25012635	25052555	15	7329	39792.3	18395.1	1502	0.0375469	Treg	IK	A830007P12Rik	0	IK_CKO_Treg
11_OCR_18257_lociStitched	chr11	58717112	58774489	11	8623	39400.8	18022.1	1503	0.0375145	Treg	IK	Trim17	0	IK_CKO_Treg
9_OCR_25264_lociStitched	chr12	86813125	86838157	9	4389	30856.9	9602.28	1509	0.0372969	Treg	IK	Fos	0	IK_CKO_Treg
3_OCR_82761_lociStitched	chr4	137772078	137778647	3	2095	26575.5	5341.25	1510	0.0372611	Treg	IK	Hp1bp3	0	IK_CKO_Treg
9_OCR_92258_lociStitched	chr6	34801155	34836393	9	5281	31041.2	9817.31	1511	0.0372428	Treg	IK	3110062M04Rik	0	IK_CKO_Treg
6_OCR_9027_lociStitched	chr10	5941013	5959962	6	3062	28209.4	6992.18	1512	0.0372311	Treg	IK	Zbtb2	0	IK_CKO_Treg
8_OCR_98765_lociStitched	chr7	13608333	13649056	8	7792	39411.7	18227.6	1515	0.0371731	Treg	IK	Mzf1	0	IK_CKO_Treg
8_OCR_35754_lociStitched	chr14	56472572	56505033	8	4935	33074.5	11913.2	1516	0.0371331	Treg	IK	Khnyn	0	IK_CKO_Treg
4_OCR_108483_lociStitched	chr8	83865437	83874716	4	2803	23818.3	2662.15	1517	0.037124	Treg	IK	Inpp4b	0	IK_CKO_Treg
12_OCR_59389_lociStitched	chr19	47957000	48012584	12	8223	35307	14240.6	1521	0.0369664	Treg	IK	Ccdc147	0	IK_CKO_Treg
8_OCR_39070_lociStitched	chr15	12037969	12066565	8	4598	27921.1	6883.06	1524	0.0369168	Treg	IK	Zfr	0	IK_CKO_Treg
5_OCR_15351_lociStitched	chr10	121017313	121024821	5	3547	25392.8	4356.14	1525	0.0369144	Treg	IK	Tbk1	0	IK_CKO_Treg
9_OCR_83120_lociStitched	chr4	144480520	144506513	9	5440	28319.4	7382.01	1528	0.0367401	Treg	IK	Dhrs3	0	IK_CKO_Treg

## Sheet: Ikcko alpha
2210417K05Rik
3110062M04Rik		133 upregulated superenhancers
4930432K21Rik
7SK		25 nearest genes upregulated
A430072P03Rik
A830007P12Rik
AC126690.2		0.19
AC149056.1
Add1
Adssl1
AL929404.1
Aldh4a1
Ankrd46	up
Anp32b
Anxa2	up
Ap1m1
Arih1
Arl6ip6
Atp1a1
Azin1
Bco2
C130040N14Rik
C130046K22Rik
Cab39
Cacna1g
Ccdc12
Ccdc147
Cct4
Ceacam19
Cmas
Coq9
Cradd
Cradd
Cul3
D18Ertd653e
Dhrs3
Dleu2	up
Dok2
Dync1h1
Eef1a1
Esyt2
Fam109a
Fam129b	up
Fndc3a	up
Fos
Ganab
Gatad2a
Ggcx
Ggta1	up
Gm10812
Gm11958
Gm13012
Gm13022
Gm15417
Gm16641
Gm17112
Gm17436
Gm17504
Gm5544
Gm8731
Gm9821
Gnas
Gramd1b
Gse1	up
Gypc
Hacl1
Heg1
Hp1bp3
Hpcal1	up
Ikbke
Inpp4b
Irf8	up
Isca2
Itgb1	up
Jph4
Kcnk5	up
Khnyn
Klf10	up
Lats1
Maml3	up
Man2a2	up
Map3k5
Map4k1
Mir193
Mxd1
Myc
Myo18a
Mzf1
Nfat5	up
Nfatc2
Nfkbia	up
Nod2	up
Nufip2
Pdcd1lg2
Phlda1	up
Popdc2
Ptger4
Ptprj	up
Pxn
Rab5a
Rbm20
Rbms1
Rftn1
Rhoc	up
Rnf139
Rptor
Samd14
Sema7a	up
Setd8
Shd
Shoc2
Slc25a25	up
Slc4a2
Sod2
Ssbp3
Ssh1
St3gal2
Tbk1
Tbkbp1	up
Tbl1xr1
Tbxas1
Tex2
Tmbim6
Tnrc6a
Traf3ip2
Trim17
U6
Wisp1	up
Ypel2	up
Zbtb2
Zfand3
Zfpm1
Zfr
