# Supplementary material for: Foxp3 depends on Ikaros for control of regulatory T cell gene expression and function
Source: eLife. 2024 Apr 24;12:RP91392. doi: 10.7554/eLife.91392 (PMC11042806; doi:10.7554/eLife.91392)
Supplement: Supplementary file 9. — The coordinates (mm9) for each peak are indicated as well as the nearest gene and associated distance. In_ocr indicates whether the Foxp3 peak overlaps with an open chromatin region (OCR). [file elife-91392-supp9.xlsx]

## Sheet: IKcKO_Foxp3Chip_binary_comparis
ChIP-seq analysis of Foxp3 binding
chr	start	end	id	peak_type	nearest_gene	distance_to_nearest_tss	in_OCR
chr1	33940365	33940709	Foxp3 1	shared	Bend6	-22	TRUE
chr1	58859266	58859965	Foxp3 10	shared	Casp8	-619	TRUE
chr2	30971517	30972587	Foxp3 100	shared	Fnbp1	-755	TRUE
chr1	53848256	53849211	Foxp3 1000	WT_specific	Stk17b	-7143	TRUE
chr1	53902809	53903426	Foxp3 1001	WT_specific	Hecw2	-5411	FALSE
chr1	53907721	53908089	Foxp3 1002	WT_specific	Hecw2	-10074	TRUE
chr1	53908246	53908496	Foxp3 1003	WT_specific	Hecw2	-10481	TRUE
chr1	54550390	54551058	Foxp3 1004	WT_specific	Pgap1	-18248	TRUE
chr1	54802014	54802298	Foxp3 1005	WT_specific	AC151572.1	23764	FALSE
chr1	54883605	54883958	Foxp3 1006	WT_specific	AC151572.1	-57896	FALSE
chr1	54897959	54898363	Foxp3 1007	WT_specific	AC151572.1	-72301	FALSE
chr1	54898508	54898996	Foxp3 1008	WT_specific	AC151572.1	-72934	TRUE
chr1	54925761	54926089	Foxp3 1009	WT_specific	Ankrd44	57142	FALSE
chr2	32348323	32349741	Foxp3 101	shared	Gm13412	30810	TRUE
chr1	54927672	54927958	Foxp3 1010	WT_specific	Ankrd44	55273	TRUE
chr1	54929733	54930054	Foxp3 1011	WT_specific	Ankrd44	53177	FALSE
chr1	54954591	54955124	Foxp3 1012	WT_specific	Ankrd44	28107	TRUE
chr1	54958416	54958984	Foxp3 1013	WT_specific	Ankrd44	24247	FALSE
chr1	54963524	54965017	Foxp3 1014	WT_specific	Ankrd44	18214	TRUE
chr1	54965789	54966234	Foxp3 1015	WT_specific	Ankrd44	16997	TRUE
chr1	54969139	54970063	Foxp3 1016	WT_specific	Ankrd44	13168	TRUE
chr1	54970304	54970611	Foxp3 1017	WT_specific	Ankrd44	12620	TRUE
chr1	55484923	55485252	Foxp3 1018	WT_specific	Gm6644	16656	TRUE
chr1	55492595	55492885	Foxp3 1019	WT_specific	Gm6644	9023	TRUE
chr2	32349945	32351241	Foxp3 102	shared	Gm13412	29310	TRUE
chr1	58775403	58775733	Foxp3 1020	WT_specific	Cflar	-5572	FALSE
chr1	58776670	58777537	Foxp3 1021	WT_specific	Cflar	-7376	TRUE
chr1	58778351	58778652	Foxp3 1022	WT_specific	Cflar	-8491	TRUE
chr1	58783464	58783862	Foxp3 1023	WT_specific	Cflar	3534	TRUE
chr1	58798952	58799274	Foxp3 1024	WT_specific	Cflar	-11878	TRUE
chr1	58799517	58800238	Foxp3 1025	WT_specific	Cflar	-12842	TRUE
chr1	58858816	58859119	Foxp3 1026	WT_specific	Casp8	227	TRUE
chr1	58860089	58860426	Foxp3 1027	WT_specific	Casp8	-1080	TRUE
chr1	58864226	58864537	Foxp3 1028	WT_specific	Casp8	-5191	FALSE
chr1	60592026	60592281	Foxp3 1029	WT_specific	Gm11576	1583	FALSE
chr2	32396803	32397604	Foxp3 103	shared	Fam102a	-1894	TRUE
chr1	60802356	60802631	Foxp3 1030	WT_specific	Cd28	571	FALSE
chr1	60816351	60816683	Foxp3 1031	WT_specific	Cd28	-13437	FALSE
chr1	60909773	60911171	Foxp3 1032	WT_specific	Ctla4	32673	TRUE
chr1	60919777	60920349	Foxp3 1033	WT_specific	Ctla4	23495	TRUE
chr1	60927462	60927777	Foxp3 1034	WT_specific	Ctla4	16067	FALSE
chr1	60968998	60969659	Foxp3 1035	WT_specific	Ctla4	-3644	TRUE
chr1	60973414	60973699	Foxp3 1036	WT_specific	Ctla4	-7684	TRUE
chr1	61030477	61031162	Foxp3 1037	WT_specific	Icos	3609	TRUE
chr1	61167119	61167446	Foxp3 1038	WT_specific	Gm11590	13402	FALSE
chr1	61192833	61193127	Foxp3 1039	WT_specific	Gm11590	-12279	TRUE
chr2	34818632	34819111	Foxp3 104	shared	Gm13450	1313	TRUE
chr1	61197742	61198538	Foxp3 1040	WT_specific	Gm11590	-17690	TRUE
chr1	63777155	63777480	Foxp3 1041	WT_specific	Fastkd2	-263	TRUE
chr1	64047148	64047595	Foxp3 1042	WT_specific	Gm17427	28442	TRUE
chr1	64134895	64135216	Foxp3 1043	WT_specific	Gm13748	-9988	TRUE
chr1	67034419	67034741	Foxp3 1044	WT_specific	Lancl1	32898	TRUE
chr1	69514579	69514906	Foxp3 1045	WT_specific	Ikzf2	217628	FALSE
chr1	69585323	69585981	Foxp3 1046	WT_specific	Ikzf2	146553	FALSE
chr1	69602114	69602360	Foxp3 1047	WT_specific	Ikzf2	130174	TRUE
chr1	69639248	69639545	Foxp3 1048	WT_specific	Ikzf2	92989	FALSE
chr1	69646206	69646597	Foxp3 1049	WT_specific	Ikzf2	85937	TRUE
chr2	34987529	34988152	Foxp3 105	shared	Cep110	-374	TRUE
chr1	69667967	69668370	Foxp3 1050	WT_specific	Ikzf2	64164	FALSE
chr1	69676129	69676418	Foxp3 1051	WT_specific	Ikzf2	56116	FALSE
chr1	69685609	69685886	Foxp3 1052	WT_specific	Ikzf2	46648	FALSE
chr1	69716498	69716955	Foxp3 1053	WT_specific	Ikzf2	15579	TRUE
chr1	69815339	69815777	Foxp3 1054	WT_specific	Spag16	57785	TRUE
chr1	72629527	72630237	Foxp3 1055	WT_specific	Smarcal1	-48	TRUE
chr1	73982156	73982488	Foxp3 1056	WT_specific	Tns1	-7401	TRUE
chr1	74296214	74296496	Foxp3 1057	WT_specific	Arpc2	-13372	TRUE
chr1	79707871	79708229	Foxp3 1058	WT_specific	Wdfy1	11002	TRUE
chr1	79748451	79749037	Foxp3 1059	WT_specific	Wdfy1	9307	TRUE
chr2	35351148	35351531	Foxp3 106	shared	Gm13445	-4492	TRUE
chr1	80209809	80210760	Foxp3 1060	WT_specific	Fam124b	-241	TRUE
chr1	80730362	80730615	Foxp3 1061	WT_specific	Dock10	24513	FALSE
chr1	80742208	80742782	Foxp3 1062	WT_specific	Dock10	12346	TRUE
chr1	80745659	80746046	Foxp3 1063	WT_specific	Dock10	9082	FALSE
chr1	82829346	82829926	Foxp3 1064	WT_specific	AC138214.1	6095	TRUE
chr1	82830134	82830433	Foxp3 1065	WT_specific	AC138214.1	5588	TRUE
chr1	82831013	82831464	Foxp3 1066	WT_specific	AC138214.1	4557	TRUE
chr1	82843563	82843790	Foxp3 1067	WT_specific	Agfg1	-7732	FALSE
chr1	87546449	87546894	Foxp3 1068	WT_specific	Sp100	-269	TRUE
chr1	87632972	87633227	Foxp3 1069	WT_specific	A630001G21Rik	-91	TRUE
chr2	38327133	38327905	Foxp3 107	shared	U6	7953	TRUE
chr1	87636554	87637138	Foxp3 1070	WT_specific	A630001G21Rik	-3934	TRUE
chr1	87645438	87649530	Foxp3 1071	WT_specific	AC161342.1	10839	TRUE
chr1	87741541	87741885	Foxp3 1072	WT_specific	Itm2c	48971	TRUE
chr1	87831803	87832115	Foxp3 1073	WT_specific	4933407L21Rik	-6813	TRUE
chr1	87854817	87855139	Foxp3 1074	WT_specific	Gpr55	2491	TRUE
chr1	87857336	87857964	Foxp3 1075	WT_specific	Gpr55	-334	TRUE
chr1	87897804	87898245	Foxp3 1076	WT_specific	Spata3	15146	FALSE
chr1	88289126	88289555	Foxp3 1077	WT_specific	Nmur1	-4818	FALSE
chr1	88312146	88312889	Foxp3 1078	WT_specific	1700019O17Rik	10057	TRUE
chr1	88313100	88313422	Foxp3 1079	WT_specific	1700019O17Rik	9524	TRUE
chr2	43593900	43594841	Foxp3 108	shared	Arhgap15	9503	TRUE
chr1	88337939	88338324	Foxp3 1080	WT_specific	1700019O17Rik	-15378	TRUE
chr1	88397824	88398223	Foxp3 1081	WT_specific	Ptma	25088	TRUE
chr1	89503988	89504703	Foxp3 1082	WT_specific	Inpp5d	12184	TRUE
chr1	89517676	89518669	Foxp3 1083	WT_specific	Inpp5d	-420	TRUE
chr1	89533879	89534503	Foxp3 1084	WT_specific	Inpp5d	-16254	TRUE
chr1	89743006	89744112	Foxp3 1085	WT_specific	Dgkd	5750	TRUE
chr1	89796295	89796724	Foxp3 1086	WT_specific	Dgkd	-46862	TRUE
chr1	90113215	90113644	Foxp3 1087	WT_specific	Gm20528	1485	FALSE
chr1	90200908	90201323	Foxp3 1088	WT_specific	Trpm8	-1465	TRUE
chr1	90371838	90372330	Foxp3 1089	WT_specific	Glrp1	34131	TRUE
chr2	49168584	49169041	Foxp3 109	shared	Gm13509	-5366	TRUE
chr1	90463250	90463550	Foxp3 1090	WT_specific	Glrp1	-57089	FALSE
chr1	90473650	90474854	Foxp3 1091	WT_specific	Glrp1	-68393	TRUE
chr1	90483189	90483923	Foxp3 1092	WT_specific	Glrp1	-77462	TRUE
chr1	90484023	90485941	Foxp3 1093	WT_specific	Glrp1	-79480	TRUE
chr1	90519725	90519991	Foxp3 1094	WT_specific	Arl4c	78460	FALSE
chr1	90550974	90553553	Foxp3 1095	WT_specific	Arl4c	44898	TRUE
chr1	90605318	90605730	Foxp3 1096	WT_specific	Arl4c	-6934	TRUE
chr1	90632506	90632832	Foxp3 1097	WT_specific	Arl4c	-34036	FALSE
chr1	92953746	92954253	Foxp3 1098	WT_specific	Lrrfip1	-4090	TRUE
chr1	92958591	92959491	Foxp3 1099	WT_specific	Lrrfip1	-9328	TRUE
chr1	60802886	60803414	Foxp3 11	shared	Cd28	-168	TRUE
chr2	52171156	52171920	Foxp3 110	shared	Neb	18734	TRUE
chr1	92988041	92989840	Foxp3 1100	WT_specific	Lrrfip1	-39677	TRUE
chr1	93002606	93002939	Foxp3 1101	WT_specific	Rbm44	38741	FALSE
chr1	93957917	93958177	Foxp3 1102	WT_specific	Hdac4	-54745	FALSE
chr1	93960433	93961482	Foxp3 1103	WT_specific	Hdac4	-58050	TRUE
chr1	93961572	93962096	Foxp3 1104	WT_specific	Hdac4	-58664	FALSE
chr1	93976321	93977213	Foxp3 1105	WT_specific	Hdac4	67757	TRUE
chr1	95931681	95932238	Foxp3 1106	WT_specific	Neu4	-14065	TRUE
chr1	95945067	95945380	Foxp3 1107	WT_specific	Pdcd1	3750	FALSE
chr1	97164574	97164997	Foxp3 1108	WT_specific	Fam174a	45208	TRUE
chr1	97560843	97562353	Foxp3 1109	WT_specific	St8sia4	1818	TRUE
chr2	52174495	52174925	Foxp3 111	shared	Neb	15729	TRUE
chr1	97563341	97563626	Foxp3 1110	WT_specific	St8sia4	545	TRUE
chr1	97564201	97564488	Foxp3 1111	WT_specific	St8sia4	-317	TRUE
chr1	97650490	97650907	Foxp3 1112	WT_specific	U6	77905	TRUE
chr1	108048487	108049093	Foxp3 1113	WT_specific	Phlpp1	19236	TRUE
chr1	108214449	108214704	Foxp3 1114	WT_specific	Phlpp1	-889	TRUE
chr1	108270980	108271317	Foxp3 1115	WT_specific	Phlpp1	-57502	TRUE
chr1	108421022	108421397	Foxp3 1116	WT_specific	D630008O14Rik	17123	FALSE
chr1	108466017	108467192	Foxp3 1117	WT_specific	D630008O14Rik	-28672	TRUE
chr1	108495990	108496297	Foxp3 1118	WT_specific	D630008O14Rik	-57777	FALSE
chr1	108497942	108498220	Foxp3 1119	WT_specific	D630008O14Rik	-59700	TRUE
chr2	58007375	58007938	Foxp3 112	shared	Cytip	1270	TRUE
chr1	108509913	108510286	Foxp3 1120	WT_specific	D630008O14Rik	-71766	TRUE
chr1	108513792	108514295	Foxp3 1121	WT_specific	D630008O14Rik	-75775	TRUE
chr1	108514910	108515199	Foxp3 1122	WT_specific	D630008O14Rik	-76679	FALSE
chr1	108515633	108515985	Foxp3 1123	WT_specific	D630008O14Rik	-77465	FALSE
chr1	108543424	108543715	Foxp3 1124	WT_specific	Bcl2	67136	FALSE
chr1	108584317	108585055	Foxp3 1125	WT_specific	Bcl2	25796	TRUE
chr1	120195632	120195899	Foxp3 1126	WT_specific	Tsn	11810	FALSE
chr1	121952823	121953305	Foxp3 1127	WT_specific	Tmem37	17346	FALSE
chr1	121996361	121996744	Foxp3 1128	WT_specific	Dbi	19971	TRUE
chr1	127364083	127364556	Foxp3 1129	WT_specific	Actr3	-32489	TRUE
chr2	58008981	58009366	Foxp3 113	shared	Cytip	-158	TRUE
chr1	128714335	128714717	Foxp3 1130	WT_specific	Nckap5	12341	TRUE
chr1	129107487	129107852	Foxp3 1131	WT_specific	Mgat5	-6289	FALSE
chr1	129108476	129109089	Foxp3 1132	WT_specific	Mgat5	-7526	TRUE
chr1	129109401	129109674	Foxp3 1133	WT_specific	Mgat5	-8111	TRUE
chr1	129130148	129130636	Foxp3 1134	WT_specific	Mgat5	-29073	TRUE
chr1	129135325	129135740	Foxp3 1135	WT_specific	Mgat5	-34177	FALSE
chr1	129136312	129137489	Foxp3 1136	WT_specific	Mgat5	-35926	TRUE
chr1	129201865	129203113	Foxp3 1137	WT_specific	Mgat5	226	TRUE
chr1	129241385	129242283	Foxp3 1138	WT_specific	AC131793.1	-13894	TRUE
chr1	130510976	130511550	Foxp3 1139	WT_specific	Cxcr4	-22680	TRUE
chr2	58012156	58012643	Foxp3 114	shared	Cytip	-113	TRUE
chr1	130529541	130529965	Foxp3 1140	WT_specific	Cxcr4	-41095	FALSE
chr1	130602618	130602986	Foxp3 1141	WT_specific	Gm17699	68012	TRUE
chr1	130663208	130663523	Foxp3 1142	WT_specific	Gm17699	7475	TRUE
chr1	130664145	130664449	Foxp3 1143	WT_specific	Gm17699	6549	TRUE
chr1	130728890	130729177	Foxp3 1144	WT_specific	U6	53419	TRUE
chr1	132760792	132761216	Foxp3 1145	WT_specific	Faim3	1030	TRUE
chr1	132896341	132896639	Foxp3 1146	WT_specific	Il10	19783	TRUE
chr1	132907144	132907514	Foxp3 1147	WT_specific	Il10	8908	TRUE
chr1	132920555	132920823	Foxp3 1148	WT_specific	Il10	-4401	FALSE
chr1	132975419	132975821	Foxp3 1149	WT_specific	U6	-5493	FALSE
chr2	61331955	61332613	Foxp3 115	shared	SNORA75	-1790	TRUE
chr1	132987727	132988018	Foxp3 1150	WT_specific	Mapkapk2	6126	FALSE
chr1	133078554	133079198	Foxp3 1151	WT_specific	Eif2d	-16242	TRUE
chr1	133079787	133081547	Foxp3 1152	WT_specific	Rassf5	15165	TRUE
chr1	133082004	133082412	Foxp3 1153	WT_specific	Rassf5	14300	FALSE
chr1	133095419	133096024	Foxp3 1154	WT_specific	Rassf5	688	TRUE
chr1	133100190	133101193	Foxp3 1155	WT_specific	Rassf5	-4481	TRUE
chr1	133104265	133104505	Foxp3 1156	WT_specific	Rassf5	-7793	TRUE
chr1	133175219	133176427	Foxp3 1157	WT_specific	Ikbke	-244	TRUE
chr1	133176510	133177466	Foxp3 1158	WT_specific	Ikbke	-1283	TRUE
chr1	133509888	133510439	Foxp3 1159	WT_specific	Avpr1b	-14623	TRUE
chr2	65027454	65027919	Foxp3 116	shared	Cobll1	46133	TRUE
chr1	133534585	133535086	Foxp3 1160	WT_specific	Ctse	-15	TRUE
chr1	135963743	135964397	Foxp3 1161	WT_specific	Btg2	11300	TRUE
chr1	135994736	135996218	Foxp3 1162	WT_specific	Gm8618	9697	TRUE
chr1	136002944	136003323	Foxp3 1163	WT_specific	Gm8618	2592	TRUE
chr1	137616267	137617035	Foxp3 1164	WT_specific	Csrp1	-397	TRUE
chr1	138302106	138302479	Foxp3 1165	WT_specific	Ddx59	9369	FALSE
chr1	138447837	138448203	Foxp3 1166	WT_specific	Gm17718	73024	FALSE
chr1	138454056	138454346	Foxp3 1167	WT_specific	Gm17718	66881	FALSE
chr1	138475811	138476162	Foxp3 1168	WT_specific	Gm17718	45065	TRUE
chr1	138496821	138497069	Foxp3 1169	WT_specific	Gm17718	24158	TRUE
chr2	65180151	65180552	Foxp3 117	shared	Slc38a11	18906	TRUE
chr1	138498056	138498610	Foxp3 1170	WT_specific	Gm17718	22617	TRUE
chr1	138503719	138504083	Foxp3 1171	WT_specific	Gm17718	17144	FALSE
chr1	138504730	138504990	Foxp3 1172	WT_specific	Gm17718	16237	TRUE
chr1	138532867	138533158	Foxp3 1173	WT_specific	Zfp281	-11680	TRUE
chr1	138554900	138555453	Foxp3 1174	WT_specific	Zfp281	-33975	TRUE
chr1	138570684	138571185	Foxp3 1175	WT_specific	Gm16880	21603	FALSE
chr1	138581153	138582624	Foxp3 1176	WT_specific	Gm16880	10164	TRUE
chr1	138595377	138595835	Foxp3 1177	WT_specific	AC125186.1	-1884	TRUE
chr1	140058591	140058939	Foxp3 1178	WT_specific	Ptprc	12937	FALSE
chr1	140068781	140069048	Foxp3 1179	WT_specific	Ptprc	2828	TRUE
chr2	69929445	69930588	Foxp3 118	shared	Myo3b	3767	TRUE
chr1	140087990	140089040	Foxp3 1180	WT_specific	Ptprc	-17158	TRUE
chr1	140187272	140187513	Foxp3 1181	WT_specific	Atp6v1g3	-17198	FALSE
chr1	140224053	140224377	Foxp3 1182	WT_specific	Atp6v1g3	-54062	TRUE
chr1	140245094	140245421	Foxp3 1183	WT_specific	Atp6v1g3	-75106	TRUE
chr1	140457153	140457746	Foxp3 1184	WT_specific	Nek7	58505	TRUE
chr1	140489185	140489723	Foxp3 1185	WT_specific	Nek7	26528	TRUE
chr1	140501835	140502129	Foxp3 1186	WT_specific	Nek7	14122	FALSE
chr1	140798216	140798521	Foxp3 1187	WT_specific	n-R5s217	-23567	FALSE
chr1	140869710	140870063	Foxp3 1188	WT_specific	4930596I21Rik	4171	FALSE
chr1	145766016	145766511	Foxp3 1189	WT_specific	Rgs2	84651	TRUE
chr2	71651198	71652621	Foxp3 119	shared	Itga6	12198	TRUE
chr1	146094507	146094798	Foxp3 1190	WT_specific	Rgs1	1359	TRUE
chr1	146130840	146131334	Foxp3 1191	WT_specific	Rgs1	-34962	TRUE
chr1	146154222	146154481	Foxp3 1192	WT_specific	Rgs1	-58109	TRUE
chr1	146155368	146155675	Foxp3 1193	WT_specific	Rgs1	-59303	TRUE
chr1	153531382	153532305	Foxp3 1194	WT_specific	Fam129a	-8008	TRUE
chr1	153532817	153533489	Foxp3 1195	WT_specific	Fam129a	-9192	FALSE
chr1	153533774	153534247	Foxp3 1196	WT_specific	Fam129a	-9950	FALSE
chr1	153536656	153537001	Foxp3 1197	WT_specific	Fam129a	-12704	TRUE
chr1	153866431	153866693	Foxp3 1198	WT_specific	1700025G04Rik	-12796	TRUE
chr1	153931844	153932475	Foxp3 1199	WT_specific	1700025G04Rik	4975	TRUE
chr1	60965871	60966367	Foxp3 12	shared	Ctla4	-352	TRUE
chr2	73288340	73288881	Foxp3 120	shared	Wipf1	1886	TRUE
chr1	154884865	154885744	Foxp3 1200	WT_specific	Nmnat2	-83513	TRUE
chr1	154932359	154932853	Foxp3 1201	WT_specific	Lamc2	100724	TRUE
chr1	154933222	154933605	Foxp3 1202	WT_specific	Lamc2	99972	FALSE
chr1	154939724	154940017	Foxp3 1203	WT_specific	Lamc2	93560	TRUE
chr1	155569408	155569847	Foxp3 1204	WT_specific	Rgs16	17632	FALSE
chr1	156156826	156157032	Foxp3 1205	WT_specific	n-R5s220	1625	FALSE
chr1	156874788	156875090	Foxp3 1206	WT_specific	Gm9530	55306	TRUE
chr1	156875268	156875742	Foxp3 1207	WT_specific	Gm9530	54654	TRUE
chr1	156886085	156886833	Foxp3 1208	WT_specific	Gm9530	43563	FALSE
chr1	156887043	156888390	Foxp3 1209	WT_specific	Gm9530	42006	TRUE
chr2	73301513	73302239	Foxp3 121	shared	Gm13708	-4477	TRUE
chr1	156937524	156937896	Foxp3 1210	WT_specific	Gm9530	-7500	FALSE
chr1	156968427	156968830	Foxp3 1211	WT_specific	Ier5	-22064	TRUE
chr1	157019932	157020491	Foxp3 1212	WT_specific	Stx6	-14658	TRUE
chr1	158547135	158547711	Foxp3 1213	WT_specific	Tor3a	40878	TRUE
chr1	158563271	158563514	Foxp3 1214	WT_specific	Tor3a	25075	TRUE
chr1	158682581	158682844	Foxp3 1215	WT_specific	Fam20b	-33712	TRUE
chr1	158916035	158916635	Foxp3 1216	WT_specific	Ralgps2	-46878	TRUE
chr1	158978671	158978973	Foxp3 1217	WT_specific	1700057K13Rik	59546	TRUE
chr1	161954512	161955258	Foxp3 1218	WT_specific	4930523C07Rik	19257	TRUE
chr1	161975521	161975840	Foxp3 1219	WT_specific	4930523C07Rik	-1125	FALSE
chr2	73306938	73307507	Foxp3 122	shared	Gm13708	-9745	TRUE
chr1	161983361	161983822	Foxp3 1220	WT_specific	4930523C07Rik	-9107	TRUE
chr1	161984044	161984574	Foxp3 1221	WT_specific	4930523C07Rik	-9859	TRUE
chr1	162177505	162178000	Foxp3 1222	WT_specific	Cacybp	-35092	TRUE
chr1	162237139	162237671	Foxp3 1223	WT_specific	Rabgap1l	1575	TRUE
chr1	162239074	162239512	Foxp3 1224	WT_specific	Rabgap1l	-266	TRUE
chr1	162716477	162716676	Foxp3 1225	WT_specific	Rabgap1l	6393	TRUE
chr1	162799748	162800070	Foxp3 1226	WT_specific	SNORA26	6383	FALSE
chr1	163000470	163001392	Foxp3 1227	WT_specific	Cenpl	-369	TRUE
chr1	163002944	163003198	Foxp3 1228	WT_specific	Cenpl	-2175	FALSE
chr1	163326512	163327299	Foxp3 1229	WT_specific	Tnfsf4	-1718	TRUE
chr2	73307811	73308635	Foxp3 123	shared	Gm13708	-10873	TRUE
chr1	163544165	163544646	Foxp3 1230	WT_specific	5S_rRNA	-61849	TRUE
chr1	163664919	163665524	Foxp3 1231	WT_specific	Gm15429	-7904	TRUE
chr1	163680846	163681175	Foxp3 1232	WT_specific	Gm15429	-23555	TRUE
chr1	163697371	163697672	Foxp3 1233	WT_specific	Fasl	20744	TRUE
chr1	163906074	163906639	Foxp3 1234	WT_specific	4930558K02Rik	3128	TRUE
chr1	163921428	163921642	Foxp3 1235	WT_specific	4930558K02Rik	-11875	FALSE
chr1	164139088	164139406	Foxp3 1236	WT_specific	Dnm3os	8348	FALSE
chr1	166001930	166002368	Foxp3 1237	WT_specific	Sell	-10161	TRUE
chr1	166003141	166004321	Foxp3 1238	WT_specific	Sell	-12114	TRUE
chr1	166009161	166009612	Foxp3 1239	WT_specific	Sell	-17405	FALSE
chr2	75520066	75521641	Foxp3 124	shared	U6	3254	TRUE
chr1	166066727	166067431	Foxp3 1240	WT_specific	Selp	4018	FALSE
chr1	166812024	166812537	Foxp3 1241	WT_specific	Xcl1	53121	TRUE
chr1	166890127	166890489	Foxp3 1242	WT_specific	Xcl1	-24831	TRUE
chr1	167619092	167619639	Foxp3 1243	WT_specific	Rcsd1	18586	TRUE
chr1	167621769	167622065	Foxp3 1244	WT_specific	Rcsd1	16160	TRUE
chr1	167631457	167632506	Foxp3 1245	WT_specific	Rcsd1	5719	TRUE
chr1	167657425	167657847	Foxp3 1246	WT_specific	Rcsd1	-19622	FALSE
chr1	167660590	167661499	Foxp3 1247	WT_specific	Rcsd1	-23274	FALSE
chr1	167661759	167662172	Foxp3 1248	WT_specific	Rcsd1	-23947	FALSE
chr1	167665690	167666104	Foxp3 1249	WT_specific	Rcsd1	-27879	TRUE
chr2	76052370	76052709	Foxp3 125	shared	Pde11a	742	TRUE
chr1	167710270	167711364	Foxp3 1250	WT_specific	Gm16565	-158	TRUE
chr1	167721542	167721860	Foxp3 1251	WT_specific	Cd247	-2964	FALSE
chr1	167723808	167724678	Foxp3 1252	WT_specific	Cd247	-5782	FALSE
chr1	167728231	167728645	Foxp3 1253	WT_specific	Cd247	-9749	FALSE
chr1	167739938	167740621	Foxp3 1254	WT_specific	U6	-748	TRUE
chr1	167767559	167767991	Foxp3 1255	WT_specific	Cd247	20356	TRUE
chr1	167778668	167778903	Foxp3 1256	WT_specific	Cd247	9444	FALSE
chr1	169203644	169204019	Foxp3 1257	WT_specific	Uck2	11239	TRUE
chr1	172649651	172649950	Foxp3 1258	WT_specific	U6	32004	FALSE
chr1	172831843	172832173	Foxp3 1259	WT_specific	Fcrlb	10899	TRUE
chr2	76053622	76054584	Foxp3 126	shared	Pde11a	-1133	TRUE
chr1	172968277	172968507	Foxp3 1260	WT_specific	U1	-10411	TRUE
chr1	173044051	173044457	Foxp3 1261	WT_specific	1700009P17Rik	-337	TRUE
chr1	173160965	173161426	Foxp3 1262	WT_specific	Fcer1g	3044	FALSE
chr1	173211447	173211949	Foxp3 1263	WT_specific	Ppox	-632	TRUE
chr1	173224446	173224890	Foxp3 1264	WT_specific	Ufc1	181	TRUE
chr1	173286097	173286363	Foxp3 1265	WT_specific	Pfdn2	158	TRUE
chr1	173287894	173288242	Foxp3 1266	WT_specific	Pfdn2	-1721	TRUE
chr1	173321484	173321832	Foxp3 1267	WT_specific	Arhgap30	-2741	FALSE
chr1	173494327	173494845	Foxp3 1268	WT_specific	Cd244	-5389	TRUE
chr1	173496443	173497124	Foxp3 1269	WT_specific	Cd244	-7668	TRUE
chr2	84345105	84345477	Foxp3 127	shared	Gm13710	1553	TRUE
chr1	173537369	173537657	Foxp3 1270	WT_specific	Ly9	-166	TRUE
chr1	173775245	173775746	Foxp3 1271	WT_specific	Cd84	-4982	TRUE
chr1	173779695	173779982	Foxp3 1272	WT_specific	Cd84	-9218	FALSE
chr1	173850032	173850534	Foxp3 1273	WT_specific	Slamf6	-2695	FALSE
chr1	173851129	173852080	Foxp3 1274	WT_specific	Slamf6	-4241	TRUE
chr1	173869351	173869836	Foxp3 1275	WT_specific	Slamf6	-21997	TRUE
chr1	173895123	173895388	Foxp3 1276	WT_specific	Vangl2	43772	FALSE
chr1	173914312	173914901	Foxp3 1277	WT_specific	Vangl2	24259	FALSE
chr1	174240128	174240496	Foxp3 1278	WT_specific	Igsf8	1406	TRUE
chr1	174456083	174456405	Foxp3 1279	WT_specific	Ccdc19	-225	TRUE
chr2	93293661	93295634	Foxp3 128	shared	Gm10804	-2656	TRUE
chr1	175367096	175367614	Foxp3 1280	WT_specific	Aim2	15341	TRUE
chr1	175810546	175810890	Foxp3 1281	WT_specific	Mnda	32163	TRUE
chr1	175872880	175873165	Foxp3 1282	WT_specific	Ifi203	-362	TRUE
chr1	182144965	182145372	Foxp3 1283	WT_specific	Psen2	14784	TRUE
chr1	182177928	182178828	Foxp3 1284	WT_specific	Psen2	-547	TRUE
chr1	182208832	182209272	Foxp3 1285	WT_specific	Psen2	-15703	FALSE
chr1	182241802	182243487	Foxp3 1286	WT_specific	Itpkb	17120	TRUE
chr1	182243751	182244539	Foxp3 1287	WT_specific	Itpkb	16068	TRUE
chr1	182244953	182245321	Foxp3 1288	WT_specific	Itpkb	15286	TRUE
chr1	182285528	182287265	Foxp3 1289	WT_specific	Gm5069	-26584	TRUE
chr2	102838464	102839502	Foxp3 129	shared	Pdhx	73990	TRUE
chr1	182293180	182293652	Foxp3 1290	WT_specific	Gm5069	-32971	FALSE
chr1	182294073	182294557	Foxp3 1291	WT_specific	Gm5069	-33876	TRUE
chr1	182321468	182322031	Foxp3 1292	WT_specific	Gm5069	-61350	FALSE
chr1	182322558	182323887	Foxp3 1293	WT_specific	Gm5069	-63206	TRUE
chr1	182327536	182327860	Foxp3 1294	WT_specific	Gm5069	-67179	FALSE
chr1	182329675	182330877	Foxp3 1295	WT_specific	Gm5069	-70196	FALSE
chr1	182331376	182332179	Foxp3 1296	WT_specific	Gm5069	-71498	TRUE
chr1	182332335	182332872	Foxp3 1297	WT_specific	Gm5069	-72191	FALSE
chr1	182357620	182358258	Foxp3 1298	WT_specific	6330403A02Rik	55340	TRUE
chr1	182359017	182359404	Foxp3 1299	WT_specific	6330403A02Rik	54194	FALSE
chr1	61035948	61036578	Foxp3 13	shared	Icos	-1807	TRUE
chr2	103497199	103498491	Foxp3 130	shared	Abtb2	56701	TRUE
chr1	182362040	182362431	Foxp3 1300	WT_specific	6330403A02Rik	51167	TRUE
chr1	182742551	182742824	Foxp3 1301	WT_specific	H3f3a	841	FALSE
chr1	182758911	182759341	Foxp3 1302	WT_specific	U6	3559	FALSE
chr1	182917723	182918232	Foxp3 1303	WT_specific	Ephx1	8069	TRUE
chr1	183157095	183157439	Foxp3 1304	WT_specific	A430110L20Rik	-1232	TRUE
chr1	183157706	183158628	Foxp3 1305	WT_specific	A430110L20Rik	-2421	TRUE
chr1	183158691	183159168	Foxp3 1306	WT_specific	A430110L20Rik	-2961	FALSE
chr1	183160715	183161202	Foxp3 1307	WT_specific	A430110L20Rik	-4995	TRUE
chr1	183161333	183161562	Foxp3 1308	WT_specific	A430110L20Rik	-5355	TRUE
chr1	183161997	183163031	Foxp3 1309	WT_specific	A430110L20Rik	-6824	TRUE
chr2	117200466	117200940	Foxp3 131	shared	Rasgrp1	-32203	TRUE
chr1	183228379	183229232	Foxp3 1310	WT_specific	Cnih3	53527	TRUE
chr1	183264661	183265044	Foxp3 1311	WT_specific	Cnih3	17715	TRUE
chr1	183790538	183791404	Foxp3 1312	WT_specific	Gm5533	-8084	TRUE
chr1	183980405	183981143	Foxp3 1313	WT_specific	Enah	-31032	FALSE
chr1	184291767	184292228	Foxp3 1314	WT_specific	Fbxo28	-20491	FALSE
chr1	184299610	184300249	Foxp3 1315	WT_specific	Fbxo28	-28512	TRUE
chr1	184311986	184312725	Foxp3 1316	WT_specific	Gm10517	26426	FALSE
chr1	184313106	184313686	Foxp3 1317	WT_specific	Gm10517	25465	TRUE
chr1	184918479	184919120	Foxp3 1318	WT_specific	Tlr5	-16189	FALSE
chr1	185829074	185829966	Foxp3 1319	WT_specific	Dusp10	7215	TRUE
chr2	117215241	117215805	Foxp3 132	shared	Gm13982	27628	TRUE
chr1	185871812	185872162	Foxp3 1320	WT_specific	Dusp10	-13902	TRUE
chr1	185875877	185876163	Foxp3 1321	WT_specific	Dusp10	-17903	TRUE
chr1	193245551	193245901	Foxp3 1322	WT_specific	Ppp2r5a	-24981	TRUE
chr1	193269722	193270186	Foxp3 1323	WT_specific	Ppp2r5a	-49266	TRUE
chr1	193422637	193422940	Foxp3 1324	WT_specific	Ints7	-23298	TRUE
chr1	194986502	194986904	Foxp3 1325	WT_specific	Irf6	-3491	TRUE
chr1	195014884	195015945	Foxp3 1326	WT_specific	Gm15872	-2376	TRUE
chr1	195016072	195017180	Foxp3 1327	WT_specific	Gm15872	-3611	TRUE
chr1	195017417	195018421	Foxp3 1328	WT_specific	Gm15872	-4852	FALSE
chr1	195033964	195034721	Foxp3 1329	WT_specific	1600010F14Rik	-777	TRUE
chr2	122477157	122478374	Foxp3 133	shared	Mir147	-11835	TRUE
chr1	195090231	195090594	Foxp3 1330	WT_specific	Hsd11b1	-346	TRUE
chr1	196843016	196843699	Foxp3 1331	WT_specific	A330023F24Rik	-106	FALSE
chr1	196957303	196957719	Foxp3 1332	WT_specific	Cr1l	-220	TRUE
chr10	3012697	3012940	Foxp3 1333	WT_specific	Cnksr3	121364	TRUE
chr10	3227535	3228093	Foxp3 1334	WT_specific	Cnksr3	-17058	TRUE
chr10	3355724	3356342	Foxp3 1335	WT_specific	Ipcef1	-10245	TRUE
chr10	3363566	3364076	Foxp3 1336	WT_specific	Ipcef1	1931	TRUE
chr10	5713652	5714038	Foxp3 1337	WT_specific	Esr1	20457	TRUE
chr10	7544105	7544424	Foxp3 1338	WT_specific	Zc3h12d	7844	TRUE
chr10	7544756	7545408	Foxp3 1339	WT_specific	Zc3h12d	6860	TRUE
chr2	127033366	127034559	Foxp3 134	shared	Snrnp200	-419	TRUE
chr10	7545542	7546288	Foxp3 1340	WT_specific	Zc3h12d	5980	TRUE
chr10	7553148	7553469	Foxp3 1341	WT_specific	Zc3h12d	-1201	TRUE
chr10	7553666	7554378	Foxp3 1342	WT_specific	Zc3h12d	-2110	FALSE
chr10	7557581	7558111	Foxp3 1343	WT_specific	Mir5104	-1932	FALSE
chr10	7563781	7564307	Foxp3 1344	WT_specific	SNORA40	3972	TRUE
chr10	7851182	7851481	Foxp3 1345	WT_specific	Tab2	-175453	TRUE
chr10	7933644	7934136	Foxp3 1346	WT_specific	Tab2	-258108	TRUE
chr10	7935014	7935448	Foxp3 1347	WT_specific	Tab2	-259420	FALSE
chr10	12530870	12531370	Foxp3 1348	WT_specific	Utrn	1967	FALSE
chr10	12533572	12533871	Foxp3 1349	WT_specific	Utrn	-534	TRUE
chr2	127144066	127146037	Foxp3 135	shared	Dusp2	15858	TRUE
chr10	12540823	12541418	Foxp3 1350	WT_specific	Utrn	-8081	TRUE
chr10	12542995	12543946	Foxp3 1351	WT_specific	Utrn	-10609	TRUE
chr10	12557264	12557717	Foxp3 1352	WT_specific	Utrn	23816	FALSE
chr10	12594240	12594803	Foxp3 1353	WT_specific	Utrn	-5640	TRUE
chr10	12697781	12698182	Foxp3 1354	WT_specific	Stx11	-14117	TRUE
chr10	12705085	12705445	Foxp3 1355	WT_specific	Stx11	-21380	FALSE
chr10	13552655	13553325	Foxp3 1356	WT_specific	Aig1	10767	TRUE
chr10	13702719	13703078	Foxp3 1357	WT_specific	Hivep2	-16893	TRUE
chr10	13714090	13714526	Foxp3 1358	WT_specific	Gm8330	12685	FALSE
chr10	13737744	13738178	Foxp3 1359	WT_specific	Gm8330	-10967	TRUE
chr2	128119567	128121072	Foxp3 136	shared	Gm14012	-55693	TRUE
chr10	13762032	13762753	Foxp3 1360	WT_specific	Gm8330	-35542	TRUE
chr10	13763818	13764524	Foxp3 1361	WT_specific	Gm8330	-37313	FALSE
chr10	13767171	13767956	Foxp3 1362	WT_specific	Gm8330	-40745	FALSE
chr10	13804956	13805243	Foxp3 1363	WT_specific	Gm8330	-78032	TRUE
chr10	13805769	13806095	Foxp3 1364	WT_specific	Gm8330	-78884	TRUE
chr10	17441978	17442336	Foxp3 1365	WT_specific	Cited2	698	TRUE
chr10	17682143	17682457	Foxp3 1366	WT_specific	Heca	-14584	FALSE
chr10	17707999	17708523	Foxp3 1367	WT_specific	Gm17711	22551	TRUE
chr10	17785837	17786652	Foxp3 1368	WT_specific	Reps1	-10842	TRUE
chr10	18721810	18722500	Foxp3 1369	WT_specific	Tnfaip3	6151	TRUE
chr2	128192913	128194410	Foxp3 137	shared	Gm14010	54980	TRUE
chr10	18723349	18723627	Foxp3 1370	WT_specific	Tnfaip3	5024	FALSE
chr10	18726623	18727084	Foxp3 1371	WT_specific	Tnfaip3	1567	FALSE
chr10	18727611	18728794	Foxp3 1372	WT_specific	Tnfaip3	-143	TRUE
chr10	18781884	18782675	Foxp3 1373	WT_specific	Tnfaip3	-47212	TRUE
chr10	18903442	18904384	Foxp3 1374	WT_specific	Tnfaip3	-168921	FALSE
chr10	18906775	18907232	Foxp3 1375	WT_specific	Olig3	169134	FALSE
chr10	18911938	18912746	Foxp3 1376	WT_specific	Olig3	163620	TRUE
chr10	18914345	18914777	Foxp3 1377	WT_specific	Olig3	161589	FALSE
chr10	18960225	18960508	Foxp3 1378	WT_specific	Olig3	115858	TRUE
chr10	19225798	19226054	Foxp3 1379	WT_specific	Ifngr1	85701	TRUE
chr2	128203612	128204030	Foxp3 138	shared	Gm14010	45360	TRUE
chr10	19226265	19226591	Foxp3 1380	WT_specific	Ifngr1	85164	TRUE
chr10	19227186	19227869	Foxp3 1381	WT_specific	Ifngr1	83886	FALSE
chr10	19228048	19228540	Foxp3 1382	WT_specific	Ifngr1	83215	FALSE
chr10	19249783	19250286	Foxp3 1383	WT_specific	Ifngr1	61469	TRUE
chr10	19660981	19661290	Foxp3 1384	WT_specific	Map3k5	-6261	TRUE
chr10	19681625	19682742	Foxp3 1385	WT_specific	Map3k5	-11881	TRUE
chr10	19721828	19722213	Foxp3 1386	WT_specific	Map3k5	-51352	FALSE
chr10	19845815	19846527	Foxp3 1387	WT_specific	Map3k5	963	FALSE
chr10	20626908	20627172	Foxp3 1388	WT_specific	Ahi1	45219	TRUE
chr10	20819546	20819927	Foxp3 1389	WT_specific	Gm16786	44973	TRUE
chr2	128253122	128255374	Foxp3 139	shared	Gm14005	-745	TRUE
chr10	20898221	20898876	Foxp3 1390	WT_specific	Myb	-18086	TRUE
chr10	20907424	20907656	Foxp3 1391	WT_specific	Myb	-26866	FALSE
chr10	20916425	20916799	Foxp3 1392	WT_specific	AC153556.1	28897	TRUE
chr10	20920485	20920964	Foxp3 1393	WT_specific	AC153556.1	24732	TRUE
chr10	20942452	20942923	Foxp3 1394	WT_specific	AC153556.1	2773	TRUE
chr10	20944628	20945298	Foxp3 1395	WT_specific	AC153556.1	398	TRUE
chr10	21023767	21024108	Foxp3 1396	WT_specific	Hbs1l	-8323	FALSE
chr10	21279609	21280132	Foxp3 1397	WT_specific	snoU13	28051	TRUE
chr10	21628697	21629086	Foxp3 1398	WT_specific	Sgk1	19190	TRUE
chr10	22018150	22018752	Foxp3 1399	WT_specific	H60b	-25600	TRUE
chr1	61106973	61107450	Foxp3 14	shared	Rpl17-ps1	25041	TRUE
chr2	132468700	132469596	Foxp3 140	shared	AU019990	2021	TRUE
chr10	22020607	22021098	Foxp3 1400	WT_specific	H60b	-27946	FALSE
chr10	22022020	22022478	Foxp3 1401	WT_specific	H60b	-29326	TRUE
chr10	24355205	24356252	Foxp3 1402	WT_specific	Enpp1	37812	TRUE
chr10	24356671	24357070	Foxp3 1403	WT_specific	Enpp1	36994	FALSE
chr10	24370403	24371204	Foxp3 1404	WT_specific	Enpp1	22860	TRUE
chr10	24473915	24474472	Foxp3 1405	WT_specific	Enpp1	-42507	TRUE
chr10	26078865	26079308	Foxp3 1406	WT_specific	5S_rRNA	-1555	TRUE
chr10	26472563	26473376	Foxp3 1407	WT_specific	Arhgap18	-149	TRUE
chr10	28313542	28313916	Foxp3 1408	WT_specific	Themis	74250	TRUE
chr10	30375340	30375751	Foxp3 1409	WT_specific	Ncoa7	-234	TRUE
chr2	152650736	152651461	Foxp3 141	shared	Bcl2l1	2810	TRUE
chr10	33830790	33831374	Foxp3 1410	WT_specific	Fam26e	-15049	TRUE
chr10	38891074	38891388	Foxp3 1411	WT_specific	Wisp3	-7788	TRUE
chr10	38961943	38962678	Foxp3 1412	WT_specific	Wisp3	-79078	TRUE
chr10	39096398	39097541	Foxp3 1413	WT_specific	Fyn	-7932	TRUE
chr10	39111216	39111764	Foxp3 1414	WT_specific	Fyn	-22155	FALSE
chr10	39122176	39122449	Foxp3 1415	WT_specific	Fyn	17366	TRUE
chr10	39141003	39141355	Foxp3 1416	WT_specific	Fyn	-1540	TRUE
chr10	39153147	39153679	Foxp3 1417	WT_specific	Gm6963	-8877	FALSE
chr10	39155486	39156088	Foxp3 1418	WT_specific	Gm6963	-11286	TRUE
chr10	39175202	39175951	Foxp3 1419	WT_specific	Fyn	-1230	TRUE
chr2	153088068	153089711	Foxp3 142	shared	Pofut1	-6403	TRUE
chr10	39179881	39180235	Foxp3 1420	WT_specific	Fyn	-5514	FALSE
chr10	39190259	39191834	Foxp3 1421	WT_specific	Fyn	-17113	TRUE
chr10	39192819	39193113	Foxp3 1422	WT_specific	Fyn	-18392	TRUE
chr10	39193432	39193761	Foxp3 1423	WT_specific	Fyn	-19040	FALSE
chr10	39198473	39199324	Foxp3 1424	WT_specific	Fyn	-24603	TRUE
chr10	39208748	39209469	Foxp3 1425	WT_specific	Fyn	22076	TRUE
chr10	39224842	39225460	Foxp3 1426	WT_specific	Fyn	6085	TRUE
chr10	39240135	39240359	Foxp3 1427	WT_specific	Fyn	-8814	TRUE
chr10	40009431	40009765	Foxp3 1428	WT_specific	Amd1	12227	FALSE
chr10	40091734	40092238	Foxp3 1429	WT_specific	4930520K10Rik	-22191	TRUE
chr2	156944821	156945518	Foxp3 143	shared	Samhd1	-9170	TRUE
chr10	40106189	40106461	Foxp3 1430	WT_specific	4930520K10Rik	-36414	TRUE
chr10	40132382	40132664	Foxp3 1431	WT_specific	4930520K10Rik	-62617	FALSE
chr10	40139672	40139967	Foxp3 1432	WT_specific	4930520K10Rik	-69920	TRUE
chr10	40196022	40196283	Foxp3 1433	WT_specific	Slc22a16	93859	TRUE
chr10	41334563	41334868	Foxp3 1434	WT_specific	Ccdc162	-27309	TRUE
chr10	41409973	41410632	Foxp3 1435	WT_specific	Ccdc162	18474	TRUE
chr10	41657130	41657385	Foxp3 1436	WT_specific	Armc2	38543	TRUE
chr10	41988885	41989726	Foxp3 1437	WT_specific	Foxo3	6776	TRUE
chr10	42111972	42112502	Foxp3 1438	WT_specific	Lace1	32612	FALSE
chr10	42580415	42580828	Foxp3 1439	WT_specific	Scml4	-229	TRUE
chr2	157272092	157273735	Foxp3 144	shared	Src	7672	TRUE
chr10	42606577	42606866	Foxp3 1440	WT_specific	Scml4	15413	TRUE
chr10	42607869	42608453	Foxp3 1441	WT_specific	Scml4	13826	TRUE
chr10	42682105	42682735	Foxp3 1442	WT_specific	Scml4	-23048	TRUE
chr10	43716869	43717596	Foxp3 1443	WT_specific	Aim1	364	TRUE
chr10	43788861	43789378	Foxp3 1444	WT_specific	Aim1	-64726	TRUE
chr10	44163516	44163815	Foxp3 1445	WT_specific	Prdm1	14678	TRUE
chr10	53760289	53760978	Foxp3 1446	WT_specific	Man1a	34537	TRUE
chr10	59033144	59033377	Foxp3 1447	WT_specific	Gm10322	45434	TRUE
chr10	59052582	59052997	Foxp3 1448	WT_specific	Gm10322	25814	TRUE
chr10	59106082	59106646	Foxp3 1449	WT_specific	Ccdc109a	-27206	TRUE
chr2	158544658	158545555	Foxp3 145	shared	AL663077.1	20319	TRUE
chr10	59436828	59438112	Foxp3 1450	WT_specific	Ddit4	-23594	TRUE
chr10	61962880	61963272	Foxp3 1451	WT_specific	Srgn	7231	TRUE
chr10	61966732	61967181	Foxp3 1452	WT_specific	Srgn	3322	FALSE
chr10	61970311	61970583	Foxp3 1453	WT_specific	Srgn	-80	TRUE
chr10	61970807	61971726	Foxp3 1454	WT_specific	Srgn	-881	TRUE
chr10	62005754	62007192	Foxp3 1455	WT_specific	AC126428.1	13748	TRUE
chr10	62016406	62017111	Foxp3 1456	WT_specific	AC126428.1	3829	TRUE
chr10	62845042	62845705	Foxp3 1457	WT_specific	Dnajc12	-514	TRUE
chr10	62891391	62891797	Foxp3 1458	WT_specific	Ctnna3	1049	TRUE
chr10	66489728	66490381	Foxp3 1459	WT_specific	Jmjd1c	68492	FALSE
chr2	158549079	158550048	Foxp3 146	shared	AL663077.1	15826	TRUE
chr10	66646724	66647007	Foxp3 1460	WT_specific	Jmjd1c	1490	FALSE
chr10	66655236	66655551	Foxp3 1461	WT_specific	Jmjd1c	-7050	TRUE
chr10	66668006	66668298	Foxp3 1462	WT_specific	Jmjd1c	12190	TRUE
chr10	66966553	66966848	Foxp3 1463	WT_specific	Egr2	31375	TRUE
chr10	66967254	66967685	Foxp3 1464	WT_specific	Egr2	30538	FALSE
chr10	67044221	67044985	Foxp3 1465	WT_specific	Gm10797	-10195	TRUE
chr10	67048325	67048948	Foxp3 1466	WT_specific	Gm10797	-14158	TRUE
chr10	67049030	67049694	Foxp3 1467	WT_specific	Gm10797	-14904	TRUE
chr10	67070897	67071247	Foxp3 1468	WT_specific	Gm10797	-36457	FALSE
chr10	67073082	67073744	Foxp3 1469	WT_specific	Gm10797	-38954	TRUE
chr2	163905291	163905579	Foxp3 147	shared	Stk4	1754	TRUE
chr10	67106306	67106795	Foxp3 1470	WT_specific	Gm10797	-72005	TRUE
chr10	67108698	67109047	Foxp3 1471	WT_specific	Gm10797	-74257	FALSE
chr10	67109183	67109837	Foxp3 1472	WT_specific	Gm10797	-75047	TRUE
chr10	67110458	67111194	Foxp3 1473	WT_specific	Gm10797	-76404	TRUE
chr10	67498473	67498795	Foxp3 1474	WT_specific	Rtkn2	7921	TRUE
chr10	67506512	67506925	Foxp3 1475	WT_specific	Rtkn2	-209	FALSE
chr10	67516217	67516551	Foxp3 1476	WT_specific	Rtkn2	-9835	TRUE
chr10	67529400	67529990	Foxp3 1477	WT_specific	Rtkn2	-23274	TRUE
chr10	67544291	67544748	Foxp3 1478	WT_specific	Rtkn2	-38032	TRUE
chr10	67600477	67600761	Foxp3 1479	WT_specific	Arid5b	-1387	TRUE
chr2	163909871	163910223	Foxp3 148	shared	Stk4	-2890	TRUE
chr10	67617923	67618264	Foxp3 1480	WT_specific	Arid5b	-18890	FALSE
chr10	67643806	67644358	Foxp3 1481	WT_specific	Arid5b	-44984	FALSE
chr10	67701186	67701731	Foxp3 1482	WT_specific	Arid5b	39743	TRUE
chr10	67702623	67703079	Foxp3 1483	WT_specific	Arid5b	38395	TRUE
chr10	67711294	67711609	Foxp3 1484	WT_specific	Arid5b	29865	TRUE
chr10	67712266	67712642	Foxp3 1485	WT_specific	Arid5b	28832	TRUE
chr10	67733145	67733380	Foxp3 1486	WT_specific	Arid5b	8094	FALSE
chr10	67819947	67820345	Foxp3 1487	WT_specific	Arid5b	-78871	TRUE
chr10	67908288	67908562	Foxp3 1488	WT_specific	1700040L02Rik	79953	TRUE
chr10	68258299	68258641	Foxp3 1489	WT_specific	Tmem26	-72069	TRUE
chr2	165780177	165781564	Foxp3 149	shared	Gm11462	3725	TRUE
chr10	69579428	69579847	Foxp3 1490	WT_specific	Ccdc6	-19978	TRUE
chr10	69643581	69643893	Foxp3 1491	WT_specific	Ccdc6	-6098	TRUE
chr10	70861897	70862498	Foxp3 1492	WT_specific	Ipmk	9613	TRUE
chr10	74683558	74684091	Foxp3 1493	WT_specific	Specc1l	8509	FALSE
chr10	74898549	74899136	Foxp3 1494	WT_specific	7SK	6229	FALSE
chr10	75028437	75029351	Foxp3 1495	WT_specific	Ggt1	-308	TRUE
chr10	75053954	75055274	Foxp3 1496	WT_specific	Gm9985	-1876	TRUE
chr10	75769596	75770028	Foxp3 1497	WT_specific	Gm16240	-14118	TRUE
chr10	76261840	76262187	Foxp3 1498	WT_specific	Pcbp3	-1578	TRUE
chr10	76985002	76985565	Foxp3 1499	WT_specific	1810008A18Rik	-7007	TRUE
chr1	61196000	61197516	Foxp3 15	shared	Gm11590	-16668	TRUE
chr2	165807834	165808136	Foxp3 150	shared	Gm11463	3288	TRUE
chr10	76985911	76986372	Foxp3 1500	WT_specific	Itgb2	6625	TRUE
chr10	76992580	76993966	Foxp3 1501	WT_specific	Itgb2	-841	TRUE
chr10	76995887	76997396	Foxp3 1502	WT_specific	Itgb2	-4271	TRUE
chr10	76997517	76997821	Foxp3 1503	WT_specific	Itgb2	-4696	FALSE
chr10	76998960	77000495	Foxp3 1504	WT_specific	Itgb2	-7370	TRUE
chr10	77000832	77001178	Foxp3 1505	WT_specific	Itgb2	-8053	TRUE
chr10	77549041	77549494	Foxp3 1506	WT_specific	Icosl	-17389	TRUE
chr10	77761102	77762369	Foxp3 1507	WT_specific	Agpat3	-1426	TRUE
chr10	79486316	79487098	Foxp3 1508	WT_specific	Hmha1	-2610	TRUE
chr10	80121039	80121454	Foxp3 1509	WT_specific	Btbd2	-1638	TRUE
chr2	165808350	165809334	Foxp3 151	shared	Gm11463	2090	TRUE
chr10	80140940	80141727	Foxp3 1510	WT_specific	Mknk2	-2689	TRUE
chr10	80157732	80158472	Foxp3 1511	WT_specific	Mob3a	6093	TRUE
chr10	80159240	80159845	Foxp3 1512	WT_specific	Mob3a	4720	TRUE
chr10	80210890	80211205	Foxp3 1513	WT_specific	Ap3d1	-6249	FALSE
chr10	80970652	80971392	Foxp3 1514	WT_specific	Gna15	-474	TRUE
chr10	81069171	81069534	Foxp3 1515	WT_specific	BC025920	94	TRUE
chr10	82129188	82129898	Foxp3 1516	WT_specific	Glt8d2	3315	TRUE
chr10	82591636	82591870	Foxp3 1517	WT_specific	1700025N21Rik	12913	FALSE
chr10	84084941	84085330	Foxp3 1518	WT_specific	Polr3b	-148	TRUE
chr10	84105553	84105793	Foxp3 1519	WT_specific	Gm17249	-20470	FALSE
chr2	165855789	165856315	Foxp3 152	shared	Ncoa3	17103	TRUE
chr10	85554731	85555025	Foxp3 1520	WT_specific	4930486F22Rik	3605	TRUE
chr10	87868046	87868533	Foxp3 1521	WT_specific	Gm17338	-22077	TRUE
chr10	92503542	92504113	Foxp3 1522	WT_specific	Gm872	-6547	TRUE
chr10	92547418	92547677	Foxp3 1523	WT_specific	Gm872	-3314	FALSE
chr10	92607923	92608177	Foxp3 1524	WT_specific	Cdk17	15444	TRUE
chr10	92628823	92629504	Foxp3 1525	WT_specific	Mir1931	-3974	TRUE
chr10	92633961	92634176	Foxp3 1526	WT_specific	Mir1931	-8646	TRUE
chr10	92641540	92642792	Foxp3 1527	WT_specific	Mir1931	-17262	TRUE
chr10	92653391	92654183	Foxp3 1528	WT_specific	Cdk17	16862	TRUE
chr10	92724093	92724391	Foxp3 1529	WT_specific	Elk3	49165	TRUE
chr2	165856523	165857206	Foxp3 153	shared	Ncoa3	16212	TRUE
chr10	92798679	92799360	Foxp3 1530	WT_specific	Elk3	-25480	TRUE
chr10	92820296	92820609	Foxp3 1531	WT_specific	Elk3	-46729	FALSE
chr10	92827386	92828468	Foxp3 1532	WT_specific	Elk3	-54588	TRUE
chr10	92856958	92857465	Foxp3 1533	WT_specific	Lta4h	58676	FALSE
chr10	92907177	92907771	Foxp3 1534	WT_specific	Lta4h	8370	TRUE
chr10	92914633	92915285	Foxp3 1535	WT_specific	Lta4h	856	TRUE
chr10	93987738	93988087	Foxp3 1536	WT_specific	Tmcc3	-10419	TRUE
chr10	94007992	94009267	Foxp3 1537	WT_specific	Tmcc3	-1091	TRUE
chr10	94292058	94292703	Foxp3 1538	WT_specific	5S_rRNA	-8303	TRUE
chr10	94327313	94327714	Foxp3 1539	WT_specific	5S_rRNA	-43314	TRUE
chr2	167767097	167769428	Foxp3 154	shared	Ptpn1	7120	TRUE
chr10	94834490	94834942	Foxp3 1540	WT_specific	Socs2	20659	TRUE
chr10	94856681	94857021	Foxp3 1541	WT_specific	Socs2	-1420	FALSE
chr10	95013643	95014059	Foxp3 1542	WT_specific	Mir3058	7896	FALSE
chr10	95140205	95140538	Foxp3 1543	WT_specific	Gm6843	-4453	TRUE
chr10	95663980	95664493	Foxp3 1544	WT_specific	AC131596.1	-37528	TRUE
chr10	95706738	95707084	Foxp3 1545	WT_specific	AC131596.1	-80119	FALSE
chr10	95727505	95727825	Foxp3 1546	WT_specific	AC131596.1	-100860	TRUE
chr10	95775478	95775821	Foxp3 1547	WT_specific	AC131596.1	-148856	FALSE
chr10	95787735	95788197	Foxp3 1548	WT_specific	AC131596.1	-161232	TRUE
chr10	95823760	95823996	Foxp3 1549	WT_specific	AC131596.1	-197031	FALSE
chr2	169980477	169981272	Foxp3 155	shared	Zfp217	-7669	TRUE
chr10	95838149	95838719	Foxp3 1550	WT_specific	AC131596.1	-211754	FALSE
chr10	95861694	95862009	Foxp3 1551	WT_specific	Btg1	217626	FALSE
chr10	95869137	95870012	Foxp3 1552	WT_specific	Btg1	209623	TRUE
chr10	95871490	95871962	Foxp3 1553	WT_specific	Btg1	207673	FALSE
chr10	95882811	95883203	Foxp3 1554	WT_specific	Btg1	196432	FALSE
chr10	96050229	96050601	Foxp3 1555	WT_specific	Btg1	29034	TRUE
chr10	96072808	96073296	Foxp3 1556	WT_specific	Btg1	6339	TRUE
chr10	96088190	96088642	Foxp3 1557	WT_specific	Btg1	-9007	TRUE
chr10	96091322	96091901	Foxp3 1558	WT_specific	Btg1	-12266	TRUE
chr10	96153123	96153825	Foxp3 1559	WT_specific	Btg1	-74190	TRUE
chr2	170043741	170045527	Foxp3 156	shared	Gm17619	-25974	TRUE
chr10	96156330	96156776	Foxp3 1560	WT_specific	Btg1	-77141	TRUE
chr10	96160083	96160947	Foxp3 1561	WT_specific	Btg1	-81312	TRUE
chr10	96164334	96164677	Foxp3 1562	WT_specific	Btg1	-85042	FALSE
chr10	96183873	96184420	Foxp3 1563	WT_specific	Btg1	-104785	TRUE
chr10	96187003	96188064	Foxp3 1564	WT_specific	Btg1	-108429	TRUE
chr10	96189079	96189512	Foxp3 1565	WT_specific	Btg1	-109877	FALSE
chr10	98237406	98237700	Foxp3 1566	WT_specific	Atp2b1	140086	TRUE
chr10	98244505	98245048	Foxp3 1567	WT_specific	Atp2b1	132738	TRUE
chr10	98269837	98270042	Foxp3 1568	WT_specific	Atp2b1	107744	FALSE
chr10	98345259	98345618	Foxp3 1569	WT_specific	Atp2b1	32168	FALSE
chr2	172226610	172227417	Foxp3 157	shared	Cass4	-8017	TRUE
chr10	98625323	98625928	Foxp3 1570	WT_specific	Poc1b	7990	FALSE
chr10	98673231	98673654	Foxp3 1571	WT_specific	Poc1b	-18128	TRUE
chr10	98698288	98698590	Foxp3 1572	WT_specific	Dusp6	27275	FALSE
chr10	98725561	98725935	Foxp3 1573	WT_specific	Dusp6	-70	TRUE
chr10	98749421	98749795	Foxp3 1574	WT_specific	Dusp6	-23930	TRUE
chr10	98855175	98855429	Foxp3 1575	WT_specific	B530045E10Rik	27727	TRUE
chr10	98924062	98924542	Foxp3 1576	WT_specific	Gad1-ps	-18178	TRUE
chr10	110594536	110594810	Foxp3 1577	WT_specific	Osbpl8	7048	TRUE
chr10	110617115	110617973	Foxp3 1578	WT_specific	Osbpl8	-16115	TRUE
chr10	110663967	110664236	Foxp3 1579	WT_specific	Osbpl8	-62378	TRUE
chr2	173277597	173277934	Foxp3 158	shared	Gm14642	-57867	TRUE
chr10	110672308	110672636	Foxp3 1580	WT_specific	Bbs10	63099	FALSE
chr10	110758735	110758971	Foxp3 1581	WT_specific	Bbs10	-23236	FALSE
chr10	111014899	111015783	Foxp3 1582	WT_specific	4933440J02Rik	15546	TRUE
chr10	111433731	111434274	Foxp3 1583	WT_specific	Glipr1	46	TRUE
chr10	111439262	111439899	Foxp3 1584	WT_specific	Glipr1	-212	TRUE
chr10	116002356	116002647	Foxp3 1585	WT_specific	5330438D12Rik	15690	TRUE
chr10	116330561	116331170	Foxp3 1586	WT_specific	Gm239	2765	TRUE
chr10	116351011	116351431	Foxp3 1587	WT_specific	Gm239	-17496	TRUE
chr10	116367570	116367860	Foxp3 1588	WT_specific	Rab3ip	6630	TRUE
chr10	116542069	116542564	Foxp3 1589	WT_specific	Cct2	-41694	TRUE
chr3	9153743	9155054	Foxp3 159	shared	Zbtb10	95548	TRUE
chr10	116803564	116803942	Foxp3 1590	WT_specific	Cpsf6	-3653	FALSE
chr10	116854537	116854846	Foxp3 1591	WT_specific	Cpsf6	-37775	TRUE
chr10	117269594	117270042	Foxp3 1592	WT_specific	Rap1b	12949	FALSE
chr10	117309507	117309857	Foxp3 1593	WT_specific	Rap1b	-26866	FALSE
chr10	117331244	117331971	Foxp3 1594	WT_specific	Rap1b	-48980	TRUE
chr10	117336602	117336992	Foxp3 1595	WT_specific	Rap1b	-54001	FALSE
chr10	117346711	117346989	Foxp3 1596	WT_specific	Rap1b	-63998	TRUE
chr10	117347558	117348006	Foxp3 1597	WT_specific	Rap1b	-65015	TRUE
chr10	117353103	117353584	Foxp3 1598	WT_specific	Rap1b	-70593	TRUE
chr10	117376535	117377473	Foxp3 1599	WT_specific	Rap1b	-94482	TRUE
chr1	72353850	72354446	Foxp3 16	shared	Xrcc5	-451	TRUE
chr3	19329494	19330408	Foxp3 160	shared	Dnajc5b	78187	TRUE
chr10	117388941	117390886	Foxp3 1600	WT_specific	Rap1b	-107895	TRUE
chr10	117421180	117421484	Foxp3 1601	WT_specific	Rap1b	-138493	FALSE
chr10	117437565	117438035	Foxp3 1602	WT_specific	Mdm1	140808	FALSE
chr10	117438463	117439630	Foxp3 1603	WT_specific	Mdm1	139213	TRUE
chr10	117446658	117447083	Foxp3 1604	WT_specific	Mdm1	131760	FALSE
chr10	117519647	117520023	Foxp3 1605	WT_specific	Mdm1	58820	TRUE
chr10	117520163	117521482	Foxp3 1606	WT_specific	Mdm1	57361	TRUE
chr10	117535033	117535310	Foxp3 1607	WT_specific	Mdm1	43533	FALSE
chr10	117632270	117632522	Foxp3 1608	WT_specific	Il22	9476	TRUE
chr10	117855697	117856046	Foxp3 1609	WT_specific	Ifng	22057	TRUE
chr3	21851641	21852635	Foxp3 161	shared	Tbl1xr1	122939	TRUE
chr10	117856114	117856502	Foxp3 1610	WT_specific	Ifng	21601	TRUE
chr10	117892876	117893141	Foxp3 1611	WT_specific	Ifng	-15038	FALSE
chr10	117907507	117907918	Foxp3 1612	WT_specific	Ifng	-29815	TRUE
chr10	118320294	118320749	Foxp3 1613	WT_specific	Dyrk2	-14790	TRUE
chr10	118487347	118487814	Foxp3 1614	WT_specific	Cand1	157451	TRUE
chr10	118656537	118656811	Foxp3 1615	WT_specific	Cand1	-7146	TRUE
chr10	119658409	119658762	Foxp3 1616	WT_specific	Tmbim4	115	TRUE
chr10	120309431	120309798	Foxp3 1617	WT_specific	Msrb3	-1590	TRUE
chr10	120700183	120701196	Foxp3 1618	WT_specific	Tbc1d30	47049	TRUE
chr10	120846195	120846797	Foxp3 1619	WT_specific	Gns	-44651	TRUE
chr3	27052868	27053147	Foxp3 162	shared	1700125G22Rik	-199	TRUE
chr10	120846929	120847153	Foxp3 1620	WT_specific	Gns	-45007	TRUE
chr10	121323969	121324266	Foxp3 1621	WT_specific	Srgap1	-64077	TRUE
chr10	122015015	122015617	Foxp3 1622	WT_specific	Ppm1h	100201	TRUE
chr10	122174960	122177446	Foxp3 1623	WT_specific	Ppm1h	16808	TRUE
chr10	122238036	122238301	Foxp3 1624	WT_specific	Ppm1h	9999	TRUE
chr10	122617600	122617877	Foxp3 1625	WT_specific	Usp15	16114	FALSE
chr10	126507634	126508661	Foxp3 1626	WT_specific	Tspan31	-1344	TRUE
chr10	126541961	126542365	Foxp3 1627	WT_specific	Os9	15851	FALSE
chr10	126544090	126544390	Foxp3 1628	WT_specific	Os9	13826	TRUE
chr10	126546973	126547239	Foxp3 1629	WT_specific	Os9	10977	FALSE
chr3	30959869	30960755	Foxp3 163	shared	Prkci	-23318	TRUE
chr10	126557825	126558353	Foxp3 1630	WT_specific	Os9	-137	TRUE
chr10	126577996	126579350	Foxp3 1631	WT_specific	U6atac	-3677	TRUE
chr10	126582037	126582680	Foxp3 1632	WT_specific	U6atac	-7007	TRUE
chr10	126587444	126588233	Foxp3 1633	WT_specific	U6atac	-12560	TRUE
chr10	126660998	126661323	Foxp3 1634	WT_specific	Pip4k2c	-12645	FALSE
chr10	127577271	127577733	Foxp3 1635	WT_specific	Rbms2	35764	TRUE
chr10	127658992	127659309	Foxp3 1636	WT_specific	Mip	3585	TRUE
chr10	127739865	127741492	Foxp3 1637	WT_specific	Pan2	-1101	TRUE
chr10	127781632	127782348	Foxp3 1638	WT_specific	U8	3950	TRUE
chr10	127796040	127796500	Foxp3 1639	WT_specific	U8	-10202	TRUE
chr3	37553632	37554144	Foxp3 164	shared	Spry1	-15142	TRUE
chr10	127941655	127942027	Foxp3 1640	WT_specific	A430046D13Rik	-5607	TRUE
chr10	127942828	127943471	Foxp3 1641	WT_specific	A430046D13Rik	-7051	FALSE
chr10	127973360	127974096	Foxp3 1642	WT_specific	Esyt1	-11170	TRUE
chr10	127992277	127992556	Foxp3 1643	WT_specific	Rpl41	-6195	FALSE
chr10	128049920	128050386	Foxp3 1644	WT_specific	Gm9182	2026	TRUE
chr10	128084600	128084904	Foxp3 1645	WT_specific	Ikzf4	-1857	FALSE
chr10	128168153	128168502	Foxp3 1646	WT_specific	Dgka	12610	TRUE
chr10	128182339	128182639	Foxp3 1647	WT_specific	Dgka	-1527	TRUE
chr10	128183042	128183307	Foxp3 1648	WT_specific	Wibg	1628	TRUE
chr10	129775419	129775921	Foxp3 1649	WT_specific	Tespa1	-16013	FALSE
chr3	37657071	37657418	Foxp3 165	shared	Gm5148	-34006	TRUE
chr11	3335536	3335837	Foxp3 1650	WT_specific	Rnf185	-1851	FALSE
chr11	3863948	3864288	Foxp3 1651	WT_specific	Pes1	-236	TRUE
chr11	4105224	4106134	Foxp3 1652	WT_specific	Tbc1d10a	-708	TRUE
chr11	4146391	4146800	Foxp3 1653	WT_specific	Osm	-10377	TRUE
chr11	4189482	4190048	Foxp3 1654	WT_specific	Gm11958	-4585	TRUE
chr11	4240882	4241394	Foxp3 1655	WT_specific	U6	-17136	TRUE
chr11	4724032	4724413	Foxp3 1656	WT_specific	Nf2	511	FALSE
chr11	4794542	4794755	Foxp3 1657	WT_specific	Thoc5	568	FALSE
chr11	5197155	5197447	Foxp3 1658	WT_specific	Kremen1	-35886	TRUE
chr11	5311499	5312071	Foxp3 1659	WT_specific	Znrf3	-30328	TRUE
chr3	52422657	52423400	Foxp3 166	shared	Gm10293	-6693	TRUE
chr11	5335296	5335681	Foxp3 1660	WT_specific	Znrf3	9169	TRUE
chr11	6077793	6078568	Foxp3 1661	WT_specific	Gm11969	4469	FALSE
chr11	6078653	6080095	Foxp3 1662	WT_specific	Gm11969	2942	TRUE
chr11	6080941	6081393	Foxp3 1663	WT_specific	Gm11969	1644	TRUE
chr11	6084453	6084881	Foxp3 1664	WT_specific	Gm11969	-1844	TRUE
chr11	6265538	6266032	Foxp3 1665	WT_specific	Zmiz2	23045	TRUE
chr11	6420377	6421163	Foxp3 1666	WT_specific	Myo1g	-195	TRUE
chr11	6458973	6459940	Foxp3 1667	WT_specific	Gm11975	-434	TRUE
chr11	6460570	6461910	Foxp3 1668	WT_specific	Ccm2	-773	TRUE
chr11	6472905	6473615	Foxp3 1669	WT_specific	Ccm2	-3966	FALSE
chr3	52733825	52734480	Foxp3 167	shared	Cog6	86658	TRUE
chr11	6595327	6595612	Foxp3 1670	WT_specific	Gm11980	-9785	TRUE
chr11	6601061	6601420	Foxp3 1671	WT_specific	Gm11980	-15593	TRUE
chr11	6602234	6602623	Foxp3 1672	WT_specific	Gm11980	-16796	FALSE
chr11	6603799	6604673	Foxp3 1673	WT_specific	Gm11976	14825	FALSE
chr11	11412151	11412753	Foxp3 1674	WT_specific	4930415F15Rik	-23484	TRUE
chr11	11429029	11429573	Foxp3 1675	WT_specific	Gm11998	27851	TRUE
chr11	11455376	11455803	Foxp3 1676	WT_specific	Gm11998	1621	FALSE
chr11	11464144	11464988	Foxp3 1677	WT_specific	Gm11998	-7564	TRUE
chr11	11556350	11557448	Foxp3 1678	WT_specific	Ikzf1	27558	TRUE
chr11	11591841	11592149	Foxp3 1679	WT_specific	Ikzf1	-1814	FALSE
chr3	58905431	58905820	Foxp3 168	shared	Gpr171	-77	TRUE
chr11	11594033	11594515	Foxp3 1680	WT_specific	Gm12000	1927	FALSE
chr11	11595854	11596416	Foxp3 1681	WT_specific	Gm12000	26	TRUE
chr11	11611702	11612151	Foxp3 1682	WT_specific	Ikzf1	-11929	TRUE
chr11	11615243	11615663	Foxp3 1683	WT_specific	Ikzf1	-15441	FALSE
chr11	11615775	11616323	Foxp3 1684	WT_specific	Ikzf1	-16101	TRUE
chr11	11617738	11618100	Foxp3 1685	WT_specific	Ikzf1	-17878	TRUE
chr11	11625054	11625993	Foxp3 1686	WT_specific	Ikzf1	-25771	TRUE
chr11	11627800	11628318	Foxp3 1687	WT_specific	Ikzf1	-28096	FALSE
chr11	11632860	11633578	Foxp3 1688	WT_specific	Ikzf1	-33356	FALSE
chr11	11688452	11689006	Foxp3 1689	WT_specific	Fignl1	12458	TRUE
chr3	60320081	60320688	Foxp3 169	shared	Mbnl1	12383	TRUE
chr11	11735516	11735781	Foxp3 1690	WT_specific	Ddc	502	FALSE
chr11	20377282	20378162	Foxp3 1691	WT_specific	Gm12034	-31747	TRUE
chr11	21007006	21007423	Foxp3 1692	WT_specific	2610024D14Rik	-7886	TRUE
chr11	21012163	21012449	Foxp3 1693	WT_specific	2610024D14Rik	-12912	FALSE
chr11	21063722	21064114	Foxp3 1694	WT_specific	Peli1	-28642	TRUE
chr11	21070136	21070376	Foxp3 1695	WT_specific	7SK	27603	FALSE
chr11	21072307	21072835	Foxp3 1696	WT_specific	7SK	25144	TRUE
chr11	21124364	21124717	Foxp3 1697	WT_specific	Gm12041	2941	TRUE
chr11	21353383	21353694	Foxp3 1698	WT_specific	Gm12044	-2337	TRUE
chr11	22531834	22532120	Foxp3 1699	WT_specific	Gm12053	-5453	TRUE
chr1	74308988	74309585	Foxp3 17	shared	Gpbar1	15539	TRUE
chr3	60330768	60331302	Foxp3 170	shared	Mbnl1	1769	TRUE
chr11	22592489	22593042	Foxp3 1700	WT_specific	Gm12054	16218	TRUE
chr11	22610518	22610802	Foxp3 1701	WT_specific	Gm12054	-1542	TRUE
chr11	22677719	22678057	Foxp3 1702	WT_specific	Gm12058	9193	FALSE
chr11	22723477	22723923	Foxp3 1703	WT_specific	Gm20456	15376	TRUE
chr11	22742350	22742742	Foxp3 1704	WT_specific	Gm20456	-3443	TRUE
chr11	22743871	22744476	Foxp3 1705	WT_specific	SNORA63	2392	FALSE
chr11	22745520	22745885	Foxp3 1706	WT_specific	SNORA63	983	TRUE
chr11	22748505	22748820	Foxp3 1707	WT_specific	SNORA63	-1952	FALSE
chr11	22752371	22753479	Foxp3 1708	WT_specific	9130230N09Rik	5452	TRUE
chr11	22772467	22773045	Foxp3 1709	WT_specific	U6	-4144	TRUE
chr3	60331516	60332214	Foxp3 171	shared	Mbnl1	857	TRUE
chr11	23755623	23756346	Foxp3 1710	WT_specific	Papolg	12124	TRUE
chr11	30082872	30083304	Foxp3 1711	WT_specific	Gm17438	11304	TRUE
chr11	31660025	31660623	Foxp3 1712	WT_specific	D630024D03Rik	63850	TRUE
chr11	31848384	31848841	Foxp3 1713	WT_specific	4930524B15Rik	16751	TRUE
chr11	31911874	31912345	Foxp3 1714	WT_specific	Nsg2	-11843	TRUE
chr11	31913062	31913830	Foxp3 1715	WT_specific	Nsg2	-13328	TRUE
chr11	31919962	31920432	Foxp3 1716	WT_specific	Nsg2	-19930	TRUE
chr11	31961513	31962477	Foxp3 1717	WT_specific	Gm12108	38751	TRUE
chr11	32002972	32003334	Foxp3 1718	WT_specific	Gm12108	-2106	TRUE
chr11	32442546	32443420	Foxp3 1719	WT_specific	Stk10	-10115	TRUE
chr3	68963484	68963803	Foxp3 172	shared	Kpna4	-32768	TRUE
chr11	32453347	32454081	Foxp3 1720	WT_specific	Stk10	-20776	TRUE
chr11	32454299	32455447	Foxp3 1721	WT_specific	Stk10	-22142	TRUE
chr11	33832316	33833211	Foxp3 1722	WT_specific	Kcnmb1	29802	TRUE
chr11	33908417	33908923	Foxp3 1723	WT_specific	Kcnip1	-15771	TRUE
chr11	33909534	33909793	Foxp3 1724	WT_specific	Kcnip1	-16641	TRUE
chr11	33931517	33932264	Foxp3 1725	WT_specific	Lcp2	14656	TRUE
chr11	33943094	33943668	Foxp3 1726	WT_specific	Lcp2	3252	TRUE
chr11	33949348	33949647	Foxp3 1727	WT_specific	Lcp2	-2479	TRUE
chr11	33963700	33964369	Foxp3 1728	WT_specific	Lcp2	13808	TRUE
chr11	34551071	34551350	Foxp3 1729	WT_specific	Dock2	46035	TRUE
chr3	78980885	78982541	Foxp3 173	shared	Rapgef2	2721	TRUE
chr11	34582641	34583200	Foxp3 1730	WT_specific	Dock2	14185	TRUE
chr11	34585829	34586607	Foxp3 1731	WT_specific	Dock2	10778	FALSE
chr11	40546983	40547292	Foxp3 1732	WT_specific	Nudcd2	-46	TRUE
chr11	43171804	43172571	Foxp3 1733	WT_specific	Mir146	15392	TRUE
chr11	43200305	43200730	Foxp3 1734	WT_specific	Gm12148	-1746	FALSE
chr11	43202934	43203290	Foxp3 1735	WT_specific	Gm12148	-4306	FALSE
chr11	43223927	43224338	Foxp3 1736	WT_specific	Pttg1	12150	TRUE
chr11	44342553	44343134	Foxp3 1737	WT_specific	Rnf145	-9327	TRUE
chr11	44352463	44352898	Foxp3 1738	WT_specific	Rnf145	17435	TRUE
chr11	44353617	44354075	Foxp3 1739	WT_specific	Rnf145	16258	TRUE
chr3	87649909	87652634	Foxp3 174	shared	Sh2d2a	-1957	TRUE
chr11	45608413	45608723	Foxp3 1740	WT_specific	F630206G17Rik	12866	TRUE
chr11	45767490	45767974	Foxp3 1741	WT_specific	Thg1l	-55	FALSE
chr11	45878699	45878988	Foxp3 1742	WT_specific	Adam19	-9401	FALSE
chr11	45887420	45887935	Foxp3 1743	WT_specific	Adam19	-18348	TRUE
chr11	45889751	45890064	Foxp3 1744	WT_specific	Adam19	-20477	TRUE
chr11	45897625	45898335	Foxp3 1745	WT_specific	Adam19	-28748	TRUE
chr11	45900078	45900771	Foxp3 1746	WT_specific	Adam19	-31184	TRUE
chr11	45904476	45904929	Foxp3 1747	WT_specific	Adam19	-35342	TRUE
chr11	46065531	46065803	Foxp3 1748	WT_specific	Gm12568	-8107	TRUE
chr11	46088762	46089611	Foxp3 1749	WT_specific	Cyfip2	-5440	TRUE
chr3	89676027	89676591	Foxp3 175	shared	Il6ra	40493	TRUE
chr11	46118319	46119579	Foxp3 1750	WT_specific	Cyfip2	6143	TRUE
chr11	46160659	46161324	Foxp3 1751	WT_specific	Gm12167	-5535	FALSE
chr11	46162547	46162927	Foxp3 1752	WT_specific	Gm12167	-7138	TRUE
chr11	46185326	46185967	Foxp3 1753	WT_specific	Itk	16992	TRUE
chr11	46186290	46186646	Foxp3 1754	WT_specific	Itk	16313	TRUE
chr11	46188180	46188892	Foxp3 1755	WT_specific	Itk	14067	TRUE
chr11	46198762	46199311	Foxp3 1756	WT_specific	Itk	3648	FALSE
chr11	46200240	46200574	Foxp3 1757	WT_specific	Itk	2385	TRUE
chr11	46201775	46202321	Foxp3 1758	WT_specific	Itk	638	TRUE
chr11	46205735	46206138	Foxp3 1759	WT_specific	Itk	-3121	FALSE
chr3	90391253	90392179	Foxp3 176	shared	S100a3	11958	TRUE
chr11	46207411	46207770	Foxp3 1760	WT_specific	Fam71b	2291	FALSE
chr11	46208763	46208974	Foxp3 1761	WT_specific	Fam71b	1087	FALSE
chr11	46212450	46212871	Foxp3 1762	WT_specific	Fam71b	-2810	TRUE
chr11	46235069	46235317	Foxp3 1763	WT_specific	Med7	15110	TRUE
chr11	48601218	48601697	Foxp3 1764	WT_specific	Gnb2l1	12137	TRUE
chr11	48668796	48670157	Foxp3 1765	WT_specific	Gm16170	-3162	TRUE
chr11	48671483	48672077	Foxp3 1766	WT_specific	Gm16170	-5082	FALSE
chr11	48684649	48684908	Foxp3 1767	WT_specific	Irgm1	-39	TRUE
chr11	48685016	48685395	Foxp3 1768	WT_specific	Irgm1	-210	TRUE
chr11	48685496	48685976	Foxp3 1769	WT_specific	Irgm1	-791	TRUE
chr3	95471533	95472930	Foxp3 177	shared	Adamtsl4	8144	TRUE
chr11	48686160	48686560	Foxp3 1770	WT_specific	Irgm1	-1375	FALSE
chr11	48877831	48878176	Foxp3 1771	WT_specific	Tgtp2	-468	TRUE
chr11	48901363	48901837	Foxp3 1772	WT_specific	Gm12188	208	TRUE
chr11	48905734	48906623	Foxp3 1773	WT_specific	Gm12188	-4578	TRUE
chr11	48907707	48908205	Foxp3 1774	WT_specific	Gm12188	-6160	TRUE
chr11	48913689	48914064	Foxp3 1775	WT_specific	Gm12188	-12019	TRUE
chr11	48922483	48922782	Foxp3 1776	WT_specific	Olfr1396	4477	TRUE
chr11	49668159	49668716	Foxp3 1777	WT_specific	Mapk9	-957	TRUE
chr11	50184737	50185289	Foxp3 1778	WT_specific	Hnrnph1	5203	TRUE
chr11	51614437	51614818	Foxp3 1779	WT_specific	Sar1b	-37622	TRUE
chr3	95473149	95473960	Foxp3 178	shared	Adamtsl4	7114	TRUE
chr11	51656613	51657016	Foxp3 1780	WT_specific	Phf15	13611	TRUE
chr11	51745056	51745726	Foxp3 1781	WT_specific	AL669920.1	32158	TRUE
chr11	51857703	51857985	Foxp3 1782	WT_specific	Gm12205	-5012	FALSE
chr11	51859490	51859928	Foxp3 1783	WT_specific	Gm12205	-6955	TRUE
chr11	51888373	51888963	Foxp3 1784	WT_specific	Ppp2ca	23220	FALSE
chr11	51889388	51890112	Foxp3 1785	WT_specific	Ppp2ca	22071	TRUE
chr11	51890285	51891427	Foxp3 1786	WT_specific	Ppp2ca	20756	TRUE
chr11	51941566	51941846	Foxp3 1787	WT_specific	Gm17500	-565	FALSE
chr11	52079431	52080220	Foxp3 1788	WT_specific	Gm16953	2796	TRUE
chr11	52088908	52089540	Foxp3 1789	WT_specific	A630014C17Rik	17	TRUE
chr3	95476023	95478157	Foxp3 179	shared	Adamtsl4	2917	TRUE
chr11	52123177	52123408	Foxp3 1790	WT_specific	Tcf7	-26727	TRUE
chr11	52124214	52124621	Foxp3 1791	WT_specific	Tcf7	-27940	TRUE
chr11	52156930	52157730	Foxp3 1792	WT_specific	Vdac1	16632	FALSE
chr11	52187582	52188300	Foxp3 1793	WT_specific	Vdac1	-501	TRUE
chr11	53437629	53437868	Foxp3 1794	WT_specific	Il4	-5697	FALSE
chr11	53576647	53577381	Foxp3 1795	WT_specific	Irf1	6135	TRUE
chr11	53617575	53618368	Foxp3 1796	WT_specific	Gm12216	-8991	TRUE
chr11	53618555	53618887	Foxp3 1797	WT_specific	Gm12216	-9510	FALSE
chr11	53662376	53663055	Foxp3 1798	WT_specific	Gm12216	9591	FALSE
chr11	53664635	53665789	Foxp3 1799	WT_specific	Gm12216	6857	TRUE
chr1	80743239	80743656	Foxp3 18	shared	Dock10	11472	TRUE
chr3	97831075	97831661	Foxp3 180	shared	Notch2	-14200	TRUE
chr11	53665864	53666246	Foxp3 1800	WT_specific	Gm12216	6400	TRUE
chr11	54168635	54168988	Foxp3 1801	WT_specific	Gm12224	-2007	FALSE
chr11	54517183	54517737	Foxp3 1802	WT_specific	Rapgef6	-12803	TRUE
chr11	54543506	54544058	Foxp3 1803	WT_specific	Gm12227	-1879	FALSE
chr11	54549919	54550402	Foxp3 1804	WT_specific	Gm12227	-8223	FALSE
chr11	54561642	54562209	Foxp3 1805	WT_specific	Gm12229	-1883	FALSE
chr11	54577525	54578038	Foxp3 1806	WT_specific	Cdc42se2	-4197	TRUE
chr11	54582999	54583226	Foxp3 1807	WT_specific	Cdc42se2	-9385	FALSE
chr11	54637604	54637944	Foxp3 1808	WT_specific	Gm12228	-4523	FALSE
chr11	54659037	54659409	Foxp3 1809	WT_specific	Lyrm7	4579	FALSE
chr3	101086032	101087172	Foxp3 181	shared	Cd2	-2860	FALSE
chr11	54707500	54707848	Foxp3 1810	WT_specific	Gpx3	8107	FALSE
chr11	54785619	54786440	Foxp3 1811	WT_specific	Tnip1	-10021	TRUE
chr11	54796758	54797161	Foxp3 1812	WT_specific	Tnip1	-20742	FALSE
chr11	54797233	54797628	Foxp3 1813	WT_specific	Tnip1	-21209	TRUE
chr11	54836891	54837417	Foxp3 1814	WT_specific	Anxa6	9500	TRUE
chr11	54929604	54929908	Foxp3 1815	WT_specific	Gm12231	2389	FALSE
chr11	54934073	54934782	Foxp3 1816	WT_specific	Gm12231	-2485	TRUE
chr11	54943471	54943770	Foxp3 1817	WT_specific	Mup-ps22	-6573	FALSE
chr11	54948616	54949173	Foxp3 1818	WT_specific	Gm12233	1373	FALSE
chr11	54949378	54949810	Foxp3 1819	WT_specific	Gm12233	736	FALSE
chr3	101089716	101092658	Foxp3 182	shared	Cd2	-856	TRUE
chr11	54950418	54950973	Foxp3 1820	WT_specific	Gm12233	-427	TRUE
chr11	54976058	54976515	Foxp3 1821	WT_specific	Slc36a3	-11305	TRUE
chr11	57764887	57766315	Foxp3 1822	WT_specific	Gm12245	-3728	TRUE
chr11	57767923	57768688	Foxp3 1823	WT_specific	Gm12245	-6101	TRUE
chr11	57996691	57997285	Foxp3 1824	WT_specific	Gm12250	60	TRUE
chr11	57997403	57997786	Foxp3 1825	WT_specific	Gm12250	-441	TRUE
chr11	58003608	58004182	Foxp3 1826	WT_specific	Gm12250	-2941	TRUE
chr11	58006620	58007116	Foxp3 1827	WT_specific	Gm12250	-5875	TRUE
chr11	58007296	58007759	Foxp3 1828	WT_specific	Igtp	5299	TRUE
chr11	58012625	58012949	Foxp3 1829	WT_specific	Igtp	109	TRUE
chr3	103606806	103607204	Foxp3 183	shared	Gm15471	-145	TRUE
chr11	58018353	58018641	Foxp3 1830	WT_specific	Igtp	-5551	FALSE
chr11	58020237	58020836	Foxp3 1831	WT_specific	Igtp	-7746	FALSE
chr11	58024065	58025146	Foxp3 1832	WT_specific	Irgm2	3384	TRUE
chr11	58025800	58026984	Foxp3 1833	WT_specific	Irgm2	1546	FALSE
chr11	58028109	58028432	Foxp3 1834	WT_specific	Irgm2	98	TRUE
chr11	58116098	58116504	Foxp3 1835	WT_specific	Zfp692	4067	TRUE
chr11	58143959	58144476	Foxp3 1836	WT_specific	Sh3bp5l	-224	TRUE
chr11	60572629	60572906	Foxp3 1837	WT_specific	Top3a	-6726	FALSE
chr11	61452338	61452736	Foxp3 1838	WT_specific	Grap	14031	TRUE
chr11	61452922	61453401	Foxp3 1839	WT_specific	Grap	13366	TRUE
chr3	103661009	103662109	Foxp3 184	shared	Ptpn22	1609	TRUE
chr11	61455451	61455771	Foxp3 1840	WT_specific	Grap	10996	TRUE
chr11	61459079	61459703	Foxp3 1841	WT_specific	Grap	7064	TRUE
chr11	61461009	61461500	Foxp3 1842	WT_specific	Grap	5267	TRUE
chr11	61466184	61466519	Foxp3 1843	WT_specific	Grap	248	TRUE
chr11	61466800	61467069	Foxp3 1844	WT_specific	Grap	-302	TRUE
chr11	61470949	61471449	Foxp3 1845	WT_specific	Grap	-4682	FALSE
chr11	62302304	62302642	Foxp3 1846	WT_specific	Gm12278	-6343	FALSE
chr11	62427559	62427810	Foxp3 1847	WT_specific	4930443B20Rik	-8541	TRUE
chr11	63797701	63798220	Foxp3 1848	WT_specific	9630013K17Rik	-20492	TRUE
chr11	63798930	63799555	Foxp3 1849	WT_specific	9630013K17Rik	-21827	TRUE
chr3	103663078	103664601	Foxp3 185	shared	Ptpn22	-398	TRUE
chr11	67948708	67949133	Foxp3 1850	WT_specific	Gm12304	-39667	TRUE
chr11	68248042	68248318	Foxp3 1851	WT_specific	Pik3r5	-2656	FALSE
chr11	68261462	68262237	Foxp3 1852	WT_specific	Pik3r5	-16575	FALSE
chr11	68264816	68265557	Foxp3 1853	WT_specific	Pik3r5	-19895	TRUE
chr11	68265696	68266968	Foxp3 1854	WT_specific	Pik3r5	-21306	TRUE
chr11	68796111	68796777	Foxp3 1855	WT_specific	Pfas	7331	TRUE
chr11	68829067	68829945	Foxp3 1856	WT_specific	1500010J02Rik	-309	TRUE
chr11	68908185	68908600	Foxp3 1857	WT_specific	Per1	119	TRUE
chr11	69393886	69394855	Foxp3 1858	WT_specific	Trp53	-948	TRUE
chr11	70110911	70111982	Foxp3 1859	WT_specific	Alox12e	23097	TRUE
chr3	105804448	105805036	Foxp3 186	shared	1700027A23Rik	-621	TRUE
chr11	70392842	70394225	Foxp3 1860	WT_specific	Mink1	14406	TRUE
chr11	70394971	70395327	Foxp3 1861	WT_specific	Mink1	13304	TRUE
chr11	70409609	70409938	Foxp3 1862	WT_specific	Mink1	-1307	FALSE
chr11	70439820	70440746	Foxp3 1863	WT_specific	Gm12315	-1683	FALSE
chr11	70443680	70444276	Foxp3 1864	WT_specific	Gm12315	-5213	FALSE
chr11	70460779	70461050	Foxp3 1865	WT_specific	Rnf167	-261	TRUE
chr11	70591348	70591751	Foxp3 1866	WT_specific	Zfp3	-14040	TRUE
chr11	72115107	72115457	Foxp3 1867	WT_specific	Xaf1	-290	TRUE
chr11	72551733	72552000	Foxp3 1868	WT_specific	Ankfy1	21418	FALSE
chr11	74394430	74394775	Foxp3 1869	WT_specific	Rap1gap2	8851	FALSE
chr3	106634863	106635360	Foxp3 187	shared	Olfr266	-9860	TRUE
chr11	74821628	74822163	Foxp3 1870	WT_specific	Smg6	-14808	FALSE
chr11	75149691	75149954	Foxp3 1871	WT_specific	Rpa1	5736	TRUE
chr11	75150208	75150831	Foxp3 1872	WT_specific	Rpa1	4859	TRUE
chr11	75151322	75151706	Foxp3 1873	WT_specific	Rpa1	3984	FALSE
chr11	75285855	75286165	Foxp3 1874	WT_specific	Tlcd2	-3952	TRUE
chr11	75789570	75791303	Foxp3 1875	WT_specific	1700016K19Rik	22111	TRUE
chr11	75791569	75792003	Foxp3 1876	WT_specific	1700016K19Rik	21411	TRUE
chr11	75851109	75851630	Foxp3 1877	WT_specific	Fam101b	-10346	TRUE
chr11	76292389	76293935	Foxp3 1878	WT_specific	Abr	-11968	TRUE
chr11	76546408	76546889	Foxp3 1879	WT_specific	Gosr1	30180	FALSE
chr3	108192023	108192497	Foxp3 188	shared	Celsr2	2380	TRUE
chr11	76576681	76577183	Foxp3 1880	WT_specific	Gosr1	-114	TRUE
chr11	77297136	77297384	Foxp3 1881	WT_specific	Ankrd13b	5784	TRUE
chr11	77331847	77332465	Foxp3 1882	WT_specific	Abhd15	-345	TRUE
chr11	77332538	77333077	Foxp3 1883	WT_specific	Gm10392	-377	TRUE
chr11	77607721	77608021	Foxp3 1884	WT_specific	Gm10277	-6772	FALSE
chr11	78089971	78090257	Foxp3 1885	WT_specific	Gm11192	2311	FALSE
chr11	78413480	78413894	Foxp3 1886	WT_specific	Gm11196	-14837	TRUE
chr11	78700631	78701091	Foxp3 1887	WT_specific	Nos2	33198	TRUE
chr11	78796158	78796412	Foxp3 1888	WT_specific	Lgals9	1921	TRUE
chr11	78889575	78890511	Foxp3 1889	WT_specific	Ksr1	-17134	TRUE
chr3	115431950	115433300	Foxp3 189	shared	Gm9889	-15232	TRUE
chr11	78943690	78945188	Foxp3 1890	WT_specific	Ksr1	14668	TRUE
chr11	78949169	78949604	Foxp3 1891	WT_specific	Ksr1	10252	FALSE
chr11	79179903	79180162	Foxp3 1892	WT_specific	Gm11198	5570	TRUE
chr11	79246190	79246450	Foxp3 1893	WT_specific	Nf1	15205	FALSE
chr11	79340596	79341359	Foxp3 1894	WT_specific	Evi2a	-82	TRUE
chr11	79439887	79440250	Foxp3 1895	WT_specific	Gm11202	-3585	FALSE
chr11	79453818	79454396	Foxp3 1896	WT_specific	U6	-1766	TRUE
chr11	79454492	79454957	Foxp3 1897	WT_specific	U6	-2327	TRUE
chr11	79855350	79855702	Foxp3 1898	WT_specific	Gm16706	-12332	FALSE
chr11	79879539	79880047	Foxp3 1899	WT_specific	Crlf3	-8646	FALSE
chr1	82827291	82829220	Foxp3 19	shared	AC138214.1	6801	TRUE
chr3	115496268	115496941	Foxp3 190	shared	Gm9889	-78873	TRUE
chr11	79881243	79881517	Foxp3 1900	WT_specific	Crlf3	-10116	TRUE
chr11	79882494	79882744	Foxp3 1901	WT_specific	Crlf3	-11343	FALSE
chr11	79885283	79885565	Foxp3 1902	WT_specific	Crlf3	8873	FALSE
chr11	79900319	79900713	Foxp3 1903	WT_specific	Atad5	2189	TRUE
chr11	79959287	79959748	Foxp3 1904	WT_specific	1110002N22Rik	-4071	FALSE
chr11	80196893	80197511	Foxp3 1905	WT_specific	Zfp207	-612	TRUE
chr11	80197813	80198048	Foxp3 1906	WT_specific	Zfp207	-1149	FALSE
chr11	80322147	80322521	Foxp3 1907	WT_specific	C030013C21Rik	87	TRUE
chr11	81991500	81991884	Foxp3 1908	WT_specific	Ccl1	1430	TRUE
chr11	82761206	82761635	Foxp3 1909	WT_specific	Slfn5	3216	TRUE
chr3	115503227	115503768	Foxp3 191	shared	Gm9889	-85700	TRUE
chr11	82765567	82766548	Foxp3 1910	WT_specific	Slfn5	-944	TRUE
chr11	82804992	82805634	Foxp3 1911	WT_specific	Slfn9	-303	TRUE
chr11	82833941	82834471	Foxp3 1912	WT_specific	Slfn8	-159	TRUE
chr11	82871541	82871774	Foxp3 1913	WT_specific	Slfn2	6840	TRUE
chr11	82874183	82874698	Foxp3 1914	WT_specific	Slfn2	3916	TRUE
chr11	82876781	82877697	Foxp3 1915	WT_specific	Slfn2	917	TRUE
chr11	82880655	82881340	Foxp3 1916	WT_specific	Slfn2	-2726	TRUE
chr11	82890827	82891416	Foxp3 1917	WT_specific	Slfn2	-12802	TRUE
chr11	82929494	82930198	Foxp3 1918	WT_specific	Slfn1	153	TRUE
chr11	83003912	83004927	Foxp3 1919	WT_specific	Slfn3	-95	TRUE
chr3	115504215	115504942	Foxp3 192	shared	A930005H10Rik	86106	TRUE
chr11	83036979	83037764	Foxp3 1920	WT_specific	AI662270	-113	TRUE
chr11	83038093	83038916	Foxp3 1921	WT_specific	AI662270	-1265	TRUE
chr11	83084375	83085240	Foxp3 1922	WT_specific	U2	-240	TRUE
chr11	83140566	83140886	Foxp3 1923	WT_specific	Gm17687	-1692	FALSE
chr11	83364253	83364908	Foxp3 1924	WT_specific	Ccl5	-20888	TRUE
chr11	83453640	83453909	Foxp3 1925	WT_specific	Rpl9-ps1	5214	TRUE
chr11	85738795	85739266	Foxp3 1926	WT_specific	AL592465.1	-5786	TRUE
chr11	86070593	86070982	Foxp3 1927	WT_specific	Ints2	-140	TRUE
chr11	86277527	86277960	Foxp3 1928	WT_specific	Rnft1	20199	TRUE
chr11	86390738	86391932	Foxp3 1929	WT_specific	Mir21	5728	TRUE
chr3	115517640	115519678	Foxp3 193	shared	A930005H10Rik	71370	TRUE
chr11	86393313	86394162	Foxp3 1930	WT_specific	Mir21	3498	TRUE
chr11	86395379	86396074	Foxp3 1931	WT_specific	Mir21	1586	TRUE
chr11	86399067	86399513	Foxp3 1932	WT_specific	Vmp1	870	FALSE
chr11	86399855	86400188	Foxp3 1933	WT_specific	Vmp1	195	TRUE
chr11	86403661	86404337	Foxp3 1934	WT_specific	Vmp1	-3841	TRUE
chr11	86414039	86414289	Foxp3 1935	WT_specific	Vmp1	1476	FALSE
chr11	86706914	86708105	Foxp3 1936	WT_specific	AL596111.1	-70411	TRUE
chr11	87235306	87235536	Foxp3 1937	WT_specific	U1	833	FALSE
chr11	87499738	87500136	Foxp3 1938	WT_specific	U6	7947	TRUE
chr11	87503009	87503693	Foxp3 1939	WT_specific	U6	4390	TRUE
chr3	126353986	126354757	Foxp3 194	shared	Gm15551	17193	TRUE
chr11	87535274	87535596	Foxp3 1940	WT_specific	Rnf43	5332	FALSE
chr11	87557044	87557405	Foxp3 1941	WT_specific	Supt4h1	-6350	FALSE
chr11	87561351	87563909	Foxp3 1942	WT_specific	A430104N18Rik	5170	TRUE
chr11	87566940	87567543	Foxp3 1943	WT_specific	A430104N18Rik	1536	FALSE
chr11	87872831	87873090	Foxp3 1944	WT_specific	Gm15892	-522	TRUE
chr11	88226081	88226548	Foxp3 1945	WT_specific	Gm11510	20468	TRUE
chr11	88364241	88365041	Foxp3 1946	WT_specific	Msi2	38608	TRUE
chr11	88389074	88389616	Foxp3 1947	WT_specific	Msi2	14033	TRUE
chr11	88389722	88390646	Foxp3 1948	WT_specific	Msi2	13003	TRUE
chr11	88395623	88396255	Foxp3 1949	WT_specific	Msi2	7394	TRUE
chr3	126362731	126363855	Foxp3 195	shared	Gm15551	8095	TRUE
chr11	88459120	88459506	Foxp3 1950	WT_specific	Msi2	-55857	TRUE
chr11	88460604	88461364	Foxp3 1951	WT_specific	Msi2	-57715	TRUE
chr11	88475083	88475592	Foxp3 1952	WT_specific	Msi2	60186	TRUE
chr11	88476865	88477157	Foxp3 1953	WT_specific	Msi2	58621	FALSE
chr11	88480074	88481596	Foxp3 1954	WT_specific	Msi2	54182	TRUE
chr11	88481707	88482017	Foxp3 1955	WT_specific	Msi2	53761	TRUE
chr11	88829509	88829812	Foxp3 1956	WT_specific	Gm15698	-1567	TRUE
chr11	90039182	90039509	Foxp3 1957	WT_specific	n-R5s72	6932	FALSE
chr11	90121095	90121374	Foxp3 1958	WT_specific	Mmd	-10537	TRUE
chr11	90225123	90225454	Foxp3 1959	WT_specific	Hlf	17795	FALSE
chr3	130860255	130861106	Foxp3 196	shared	Lef1	-45382	TRUE
chr11	93889991	93890317	Foxp3 1960	WT_specific	Gm11518	8625	FALSE
chr11	93974373	93974776	Foxp3 1961	WT_specific	B230206L02Rik	20023	FALSE
chr11	94558834	94559685	Foxp3 1962	WT_specific	Gm11541	6128	TRUE
chr11	95216546	95217268	Foxp3 1963	WT_specific	Fam117a	-15992	TRUE
chr11	95217382	95218832	Foxp3 1964	WT_specific	Fam117a	-17556	TRUE
chr11	95588799	95589050	Foxp3 1965	WT_specific	B130006D01Rik	-4149	FALSE
chr11	95736901	95737584	Foxp3 1966	WT_specific	Gm11534	-1192	FALSE
chr11	96303095	96303555	Foxp3 1967	WT_specific	Gm11529	22306	TRUE
chr11	96316479	96316871	Foxp3 1968	WT_specific	Gm11529	8990	TRUE
chr11	96362844	96363325	Foxp3 1969	WT_specific	Skap1	-12150	FALSE
chr3	135168272	135168646	Foxp3 197	shared	Gm16100	-10029	TRUE
chr11	96558660	96559161	Foxp3 1970	WT_specific	Skap1	10388	FALSE
chr11	96646220	96646566	Foxp3 1971	WT_specific	Cbx1	3875	FALSE
chr11	96849210	96849728	Foxp3 1972	WT_specific	Sp2	-5455	TRUE
chr11	97171699	97172001	Foxp3 1973	WT_specific	Mrpl45	5029	TRUE
chr11	97589433	97589907	Foxp3 1974	WT_specific	Pip4k2b	-1850	TRUE
chr11	97860964	97861390	Foxp3 1975	WT_specific	Arl5c	-3895	TRUE
chr11	98128190	98128513	Foxp3 1976	WT_specific	Cdk12	-3697	FALSE
chr11	98325752	98326186	Foxp3 1977	WT_specific	U2	8936	TRUE
chr11	98338076	98338639	Foxp3 1978	WT_specific	Ikzf3	78	TRUE
chr11	98341285	98341670	Foxp3 1979	WT_specific	Ikzf3	-2953	FALSE
chr3	137644071	137644553	Foxp3 198	shared	Dapp1	-59	TRUE
chr11	98350273	98351006	Foxp3 1980	WT_specific	Ikzf3	-672	TRUE
chr11	98353044	98353675	Foxp3 1981	WT_specific	Ikzf3	-3341	TRUE
chr11	98353938	98354221	Foxp3 1982	WT_specific	Ikzf3	-3887	FALSE
chr11	98354440	98355557	Foxp3 1983	WT_specific	Ikzf3	-5223	TRUE
chr11	98358610	98359323	Foxp3 1984	WT_specific	Ikzf3	-8989	TRUE
chr11	98371750	98372079	Foxp3 1985	WT_specific	Ikzf3	-21745	TRUE
chr11	98375272	98375775	Foxp3 1986	WT_specific	Ikzf3	-25441	FALSE
chr11	98377827	98378480	Foxp3 1987	WT_specific	Ikzf3	-28146	FALSE
chr11	98430402	98430796	Foxp3 1988	WT_specific	Zpbp2	-14039	FALSE
chr11	98496727	98497153	Foxp3 1989	WT_specific	Gsdma3	-9479	TRUE
chr3	142156549	142157361	Foxp3 199	shared	Gbp5	2503	TRUE
chr11	98616059	98616328	Foxp3 1990	WT_specific	Thra	-1428	TRUE
chr11	98648698	98649067	Foxp3 1991	WT_specific	Msl1	7763	FALSE
chr11	98649897	98651062	Foxp3 1992	WT_specific	Msl1	5768	TRUE
chr11	98805130	98805378	Foxp3 1993	WT_specific	U6	2380	FALSE
chr11	98809675	98810129	Foxp3 1994	WT_specific	U6	-2371	FALSE
chr11	98959147	98959444	Foxp3 1995	WT_specific	Tns4	-8824	FALSE
chr11	98965044	98967109	Foxp3 1996	WT_specific	Tns4	-16489	TRUE
chr11	98977793	98978220	Foxp3 1997	WT_specific	Tns4	-27600	TRUE
chr11	98992087	98992416	Foxp3 1998	WT_specific	Ccr7	23975	TRUE
chr11	98992535	98992932	Foxp3 1999	WT_specific	Ccr7	23459	TRUE
chr1	36366038	36366610	Foxp3 2	shared	Arid5a	-1986	TRUE
chr1	87584043	87584399	Foxp3 20	shared	Sp100	6115	TRUE
chr3	142159775	142160795	Foxp3 200	shared	Gbp5	-889	TRUE
chr11	99011549	99012374	Foxp3 2000	WT_specific	Ccr7	4017	TRUE
chr11	99024026	99024787	Foxp3 2001	WT_specific	Ccr7	-8396	TRUE
chr11	99028716	99030198	Foxp3 2002	WT_specific	Ccr7	-13807	TRUE
chr11	99030751	99030973	Foxp3 2003	WT_specific	Ccr7	-14582	FALSE
chr11	99031455	99031770	Foxp3 2004	WT_specific	Ccr7	-15379	FALSE
chr11	99041014	99041477	Foxp3 2005	WT_specific	Ccr7	-25086	TRUE
chr11	99041726	99042284	Foxp3 2006	WT_specific	Ccr7	-25893	TRUE
chr11	99050153	99051226	Foxp3 2007	WT_specific	Smarce1	23531	TRUE
chr11	99060196	99060689	Foxp3 2008	WT_specific	Smarce1	14068	FALSE
chr11	99065564	99066010	Foxp3 2009	WT_specific	Smarce1	8747	TRUE
chr3	142223551	142224544	Foxp3 201	shared	Gbp3	-346	TRUE
chr11	99066091	99066766	Foxp3 2010	WT_specific	Smarce1	7991	FALSE
chr11	99116602	99117155	Foxp3 2011	WT_specific	Krt222	-11756	TRUE
chr11	100449357	100449884	Foxp3 2012	WT_specific	Dnajc7	2458	TRUE
chr11	100450057	100450478	Foxp3 2013	WT_specific	Dnajc7	1864	TRUE
chr11	100453979	100454331	Foxp3 2014	WT_specific	Dnajc7	-1989	FALSE
chr11	100586368	100586833	Foxp3 2015	WT_specific	Rab5c	4696	TRUE
chr11	100591919	100592303	Foxp3 2016	WT_specific	Rab5c	-774	FALSE
chr11	100678713	100679152	Foxp3 2017	WT_specific	Stat5b	4690	FALSE
chr11	100680855	100681288	Foxp3 2018	WT_specific	Stat5b	2554	TRUE
chr11	100682173	100682624	Foxp3 2019	WT_specific	Stat5b	1218	FALSE
chr3	142283448	142283991	Foxp3 202	shared	Gbp2	-392	TRUE
chr11	100683620	100684381	Foxp3 2020	WT_specific	Stat5b	-539	TRUE
chr11	100686318	100686720	Foxp3 2021	WT_specific	Stat5b	-2878	FALSE
chr11	100700429	100701099	Foxp3 2022	WT_specific	Stat5b	10753	TRUE
chr11	100704387	100704915	Foxp3 2023	WT_specific	Stat5b	6937	TRUE
chr11	100705797	100706567	Foxp3 2024	WT_specific	Stat5b	5285	FALSE
chr11	100754322	100755187	Foxp3 2025	WT_specific	Stat3	-71	TRUE
chr11	100791602	100792339	Foxp3 2026	WT_specific	Stat3	8355	FALSE
chr11	101005066	101005425	Foxp3 2027	WT_specific	Tubg2	11796	TRUE
chr11	101308774	101310028	Foxp3 2028	WT_specific	Ifi35	-144	TRUE
chr11	101311664	101312043	Foxp3 2029	WT_specific	Ifi35	-2159	FALSE
chr4	6372236	6372883	Foxp3 203	shared	Nsmaf	591	TRUE
chr11	101419239	101419502	Foxp3 2030	WT_specific	Nbr1	-1998	FALSE
chr11	101594025	101594580	Foxp3 2031	WT_specific	Dhx8	-225	TRUE
chr11	102245214	102245516	Foxp3 2032	WT_specific	Gm11616	-7182	FALSE
chr11	102347987	102348372	Foxp3 2033	WT_specific	Gm11628	5551	FALSE
chr11	102434310	102434537	Foxp3 2034	WT_specific	Gm11627	5896	TRUE
chr11	103035440	103036809	Foxp3 2035	WT_specific	Fmnl1	-4182	TRUE
chr11	103037410	103037743	Foxp3 2036	WT_specific	Fmnl1	4318	FALSE
chr11	103038302	103038837	Foxp3 2037	WT_specific	Fmnl1	3224	FALSE
chr11	103123117	103124000	Foxp3 2038	WT_specific	Map3k14	4681	TRUE
chr11	103125740	103126339	Foxp3 2039	WT_specific	Map3k14	2342	FALSE
chr4	8738189	8738567	Foxp3 204	shared	Chd7	28902	TRUE
chr11	104222027	104222354	Foxp3 2040	WT_specific	1700081L11Rik	-19741	FALSE
chr11	104451438	104451903	Foxp3 2041	WT_specific	Myl4	-5625	TRUE
chr11	104491468	104492045	Foxp3 2042	WT_specific	Itgb3	6658	TRUE
chr11	105894783	105895341	Foxp3 2043	WT_specific	Dcaf7	2845	TRUE
chr11	105910632	105911022	Foxp3 2044	WT_specific	Gm11646	2144	FALSE
chr11	105984213	105984471	Foxp3 2045	WT_specific	Gm11672	4194	TRUE
chr11	106116503	106117089	Foxp3 2046	WT_specific	Ftsj3	21	TRUE
chr11	106248876	106249753	Foxp3 2047	WT_specific	Icam2	-364	TRUE
chr11	106250086	106251096	Foxp3 2048	WT_specific	Icam2	-1707	FALSE
chr11	106397035	106397677	Foxp3 2049	WT_specific	snosnR60_Z15	15667	TRUE
chr4	8839771	8840080	Foxp3 205	shared	Rps18-ps2	28326	TRUE
chr11	106397744	106398332	Foxp3 2050	WT_specific	snosnR60_Z15	15012	TRUE
chr11	106407875	106408197	Foxp3 2051	WT_specific	snosnR60_Z15	5147	FALSE
chr11	106410483	106410836	Foxp3 2052	WT_specific	snosnR60_Z15	2508	TRUE
chr11	106525092	106525763	Foxp3 2053	WT_specific	Pecam1	26898	TRUE
chr11	106530421	106530866	Foxp3 2054	WT_specific	Pecam1	21795	FALSE
chr11	106530985	106531654	Foxp3 2055	WT_specific	Pecam1	21007	TRUE
chr11	106535197	106536779	Foxp3 2056	WT_specific	Pecam1	15882	TRUE
chr11	106540836	106541588	Foxp3 2057	WT_specific	Pecam1	11073	TRUE
chr11	106548298	106549259	Foxp3 2058	WT_specific	Pecam1	3402	FALSE
chr11	106549563	106550314	Foxp3 2059	WT_specific	Pecam1	2347	TRUE
chr4	11016736	11017933	Foxp3 206	shared	2310030N02Rik	-14581	TRUE
chr11	106600329	106600952	Foxp3 2060	WT_specific	Pecam1	10990	TRUE
chr11	106606900	106607467	Foxp3 2061	WT_specific	Pecam1	4475	FALSE
chr11	106623078	106623419	Foxp3 2062	WT_specific	U6	2636	TRUE
chr11	106623991	106624605	Foxp3 2063	WT_specific	U6	1450	TRUE
chr11	106631261	106631800	Foxp3 2064	WT_specific	Polg2	3364	TRUE
chr11	106631942	106632235	Foxp3 2065	WT_specific	Polg2	2929	FALSE
chr11	106823547	106824011	Foxp3 2066	WT_specific	Gm11707	10393	TRUE
chr11	106965144	106965398	Foxp3 2067	WT_specific	Bptf	27482	FALSE
chr11	107002082	107002569	Foxp3 2068	WT_specific	Bptf	-9128	FALSE
chr11	107220103	107220536	Foxp3 2069	WT_specific	Pitpnc1	-11092	FALSE
chr4	11073987	11074944	Foxp3 207	shared	Gm11830	-3087	TRUE
chr11	107232009	107232508	Foxp3 2070	WT_specific	Gm11712	15789	TRUE
chr11	107272272	107272657	Foxp3 2071	WT_specific	Gm11713	-953	TRUE
chr11	107274482	107275239	Foxp3 2072	WT_specific	Gm11713	-3535	FALSE
chr11	107277597	107278238	Foxp3 2073	WT_specific	Gm11713	-6534	FALSE
chr11	107303504	107304152	Foxp3 2074	WT_specific	Gm11714	-14562	FALSE
chr11	107304561	107305612	Foxp3 2075	WT_specific	Gm11714	-16022	TRUE
chr11	107308420	107309286	Foxp3 2076	WT_specific	Gm11714	-19696	TRUE
chr11	107320416	107320691	Foxp3 2077	WT_specific	Pitpnc1	11322	TRUE
chr11	107726227	107726900	Foxp3 2078	WT_specific	7SK	-38212	TRUE
chr11	108039666	108040229	Foxp3 2079	WT_specific	Gm11655	2935	TRUE
chr4	11648538	11649012	Foxp3 208	shared	Gem	-16058	TRUE
chr11	108040317	108040987	Foxp3 2080	WT_specific	Gm11655	2177	TRUE
chr11	108062824	108063309	Foxp3 2081	WT_specific	Gm11655	-20145	FALSE
chr11	108076733	108077972	Foxp3 2082	WT_specific	Gm11655	-34808	TRUE
chr11	108084661	108085127	Foxp3 2083	WT_specific	Gm11655	-41963	TRUE
chr11	108099400	108099748	Foxp3 2084	WT_specific	Gm11655	-56584	FALSE
chr11	108110392	108111003	Foxp3 2085	WT_specific	Gm11655	-67839	TRUE
chr11	108134302	108135159	Foxp3 2086	WT_specific	Apoh	69509	TRUE
chr11	108135333	108135752	Foxp3 2087	WT_specific	Apoh	68916	TRUE
chr11	108143981	108144553	Foxp3 2088	WT_specific	Apoh	60115	TRUE
chr11	108772298	108772660	Foxp3 2089	WT_specific	Axin2	9003	TRUE
chr4	32235719	32237190	Foxp3 209	shared	Gm11928	-429	TRUE
chr11	109116237	109116659	Foxp3 2090	WT_specific	Rgs9	-5194	TRUE
chr11	109173454	109173867	Foxp3 2091	WT_specific	Rgs9	-14424	TRUE
chr11	109230230	109230554	Foxp3 2092	WT_specific	Gm11696	-5586	TRUE
chr11	109258476	109258894	Foxp3 2093	WT_specific	9930022D16Rik	16337	FALSE
chr11	109262742	109263038	Foxp3 2094	WT_specific	9930022D16Rik	12193	FALSE
chr11	109293629	109294095	Foxp3 2095	WT_specific	Amz2	-65	TRUE
chr11	109295554	109296166	Foxp3 2096	WT_specific	Amz2	-860	TRUE
chr11	109355850	109356518	Foxp3 2097	WT_specific	U6	4620	TRUE
chr11	109357272	109357816	Foxp3 2098	WT_specific	U6	3322	TRUE
chr11	109406714	109407210	Foxp3 2099	WT_specific	Arsg	-2142	TRUE
chr1	89522998	89524051	Foxp3 21	shared	Inpp5d	-5802	TRUE
chr4	32250723	32252531	Foxp3 210	shared	Gm11928	-15770	TRUE
chr11	109422006	109422337	Foxp3 2100	WT_specific	Arsg	-17269	TRUE
chr11	109714026	109714267	Foxp3 2101	WT_specific	1700023C21Rik	-7075	FALSE
chr11	109720799	109721431	Foxp3 2102	WT_specific	1700023C21Rik	-14239	TRUE
chr11	109721533	109722274	Foxp3 2103	WT_specific	1700023C21Rik	-15082	TRUE
chr11	113033694	113034348	Foxp3 2104	WT_specific	2610035D17Rik	43	TRUE
chr11	114826559	114826957	Foxp3 2105	WT_specific	Cd300c	3514	FALSE
chr11	115021740	115022185	Foxp3 2106	WT_specific	Slc9a3r1	2470	FALSE
chr11	115368626	115369283	Foxp3 2107	WT_specific	Hn1	6147	FALSE
chr11	115391893	115392313	Foxp3 2108	WT_specific	Sumo2	4818	FALSE
chr11	115413870	115414631	Foxp3 2109	WT_specific	Nup85	11117	FALSE
chr4	32266354	32266805	Foxp3 211	shared	Gm11929	27318	TRUE
chr11	115492409	115493090	Foxp3 2110	WT_specific	Slc25a19	-3495	TRUE
chr11	115493517	115494197	Foxp3 2111	WT_specific	Slc25a19	-4602	TRUE
chr11	115494386	115494769	Foxp3 2112	WT_specific	Slc25a19	-5174	FALSE
chr11	115500466	115500775	Foxp3 2113	WT_specific	Slc25a19	-11180	FALSE
chr11	115502613	115503006	Foxp3 2114	WT_specific	Slc25a19	-13411	TRUE
chr11	115503106	115503796	Foxp3 2115	WT_specific	Slc25a19	-14201	TRUE
chr11	115525430	115525890	Foxp3 2116	WT_specific	Gm11702	-7017	TRUE
chr11	115576098	115576458	Foxp3 2117	WT_specific	Grb2	-6547	TRUE
chr11	115607164	115607493	Foxp3 2118	WT_specific	Gm11704	-16713	TRUE
chr11	115607818	115608322	Foxp3 2119	WT_specific	Gm11704	-17542	TRUE
chr4	32335742	32336294	Foxp3 212	shared	Bach2	-1555	FALSE
chr11	115794523	115794863	Foxp3 2120	WT_specific	Sap30bp	-267	TRUE
chr11	115795006	115795363	Foxp3 2121	WT_specific	Sap30bp	-375	TRUE
chr11	116237513	116238015	Foxp3 2122	WT_specific	Gm11741	6049	FALSE
chr11	116257046	116257702	Foxp3 2123	WT_specific	Rnf157	-8983	TRUE
chr11	116267008	116267432	Foxp3 2124	WT_specific	Rnf157	6886	FALSE
chr11	116281210	116281871	Foxp3 2125	WT_specific	Rnf157	-7525	FALSE
chr11	116954008	116954383	Foxp3 2126	WT_specific	Gm11730	3958	TRUE
chr11	117160849	117161555	Foxp3 2127	WT_specific	Sept9	7913	TRUE
chr11	117163972	117164345	Foxp3 2128	WT_specific	Sept9	5123	FALSE
chr11	117179915	117181194	Foxp3 2129	WT_specific	Sept9	6553	TRUE
chr4	32336505	32337784	Foxp3 213	shared	Gm11932	952	TRUE
chr11	117185589	117186068	Foxp3 2130	WT_specific	Sept9	1679	FALSE
chr11	117186229	117186959	Foxp3 2131	WT_specific	Sept9	788	TRUE
chr11	117187138	117187940	Foxp3 2132	WT_specific	Sept9	-193	TRUE
chr11	117194650	117196057	Foxp3 2133	WT_specific	Sept9	-2315	TRUE
chr11	117535887	117536139	Foxp3 2134	WT_specific	Tnrc6c	-20012	FALSE
chr11	117689164	117689683	Foxp3 2135	WT_specific	Tk1	-2277	TRUE
chr11	117813456	117814008	Foxp3 2136	WT_specific	Socs3	16492	TRUE
chr11	118005725	118006165	Foxp3 2137	WT_specific	Dnahc17	-15632	FALSE
chr11	118007031	118008282	Foxp3 2138	WT_specific	Dnahc17	-17749	TRUE
chr11	118008608	118009801	Foxp3 2139	WT_specific	Dnahc17	-19268	TRUE
chr4	32338009	32338574	Foxp3 214	shared	Gm11932	162	TRUE
chr11	118013657	118013912	Foxp3 2140	WT_specific	Dnahc17	-23379	FALSE
chr11	118073157	118073570	Foxp3 2141	WT_specific	Cyth1	486	TRUE
chr11	118083735	118084291	Foxp3 2142	WT_specific	Cyth1	-3952	TRUE
chr11	118084489	118085325	Foxp3 2143	WT_specific	Cyth1	2968	TRUE
chr11	118089019	118089986	Foxp3 2144	WT_specific	Cyth1	-1693	TRUE
chr11	118093501	118093898	Foxp3 2145	WT_specific	Cyth1	-5605	TRUE
chr11	118095956	118096553	Foxp3 2146	WT_specific	Cyth1	-8260	FALSE
chr11	118097798	118098925	Foxp3 2147	WT_specific	Cyth1	-10632	TRUE
chr11	118100005	118100318	Foxp3 2148	WT_specific	Cyth1	9498	FALSE
chr11	118100564	118102610	Foxp3 2149	WT_specific	Cyth1	7206	TRUE
chr4	32338781	32339862	Foxp3 215	shared	Gm11932	-1126	FALSE
chr11	118262362	118263218	Foxp3 2150	WT_specific	Lgals3bp	-32	TRUE
chr11	119024061	119024525	Foxp3 2151	WT_specific	Gm17433	-11560	TRUE
chr11	119024577	119025264	Foxp3 2152	WT_specific	Gm17433	-12299	TRUE
chr11	119025551	119026186	Foxp3 2153	WT_specific	Gm17433	-13221	FALSE
chr11	119026431	119027780	Foxp3 2154	WT_specific	Gm17433	-14815	TRUE
chr11	119523123	119523736	Foxp3 2155	WT_specific	Rptor	-6478	FALSE
chr11	119532159	119532800	Foxp3 2156	WT_specific	Rptor	-15542	TRUE
chr11	119789038	119789459	Foxp3 2157	WT_specific	Gm11766	10366	FALSE
chr11	120177125	120177452	Foxp3 2158	WT_specific	Bahcc1	-26345	TRUE
chr11	120776964	120777740	Foxp3 2159	WT_specific	AL663090.1	-3169	TRUE
chr4	32344719	32345431	Foxp3 216	shared	Gm11932	-6695	TRUE
chr11	121516879	121517287	Foxp3 2160	WT_specific	B3gntl1	17180	TRUE
chr11	121567816	121568013	Foxp3 2161	WT_specific	Metrnl	-3936	TRUE
chr12	3545493	3546153	Foxp3 2162	WT_specific	Dtnb	26228	FALSE
chr12	8528219	8528706	Foxp3 2163	WT_specific	Slc7a15	17645	TRUE
chr12	15988202	15988763	Foxp3 2164	WT_specific	Gm5432	-164954	TRUE
chr12	16005511	16005890	Foxp3 2165	WT_specific	Gm5432	-182081	TRUE
chr12	16013386	16013855	Foxp3 2166	WT_specific	AC102435.1	183302	TRUE
chr12	16140124	16140391	Foxp3 2167	WT_specific	AC102435.1	56766	TRUE
chr12	16590754	16591075	Foxp3 2168	WT_specific	Lpin1	5501	TRUE
chr12	17440590	17441091	Foxp3 2169	WT_specific	Mir3066	-78893	FALSE
chr4	32345751	32346067	Foxp3 217	shared	Gm11932	-7331	TRUE
chr12	17560912	17561365	Foxp3 2170	WT_specific	SNORA42	-8413	TRUE
chr12	25220777	25221103	Foxp3 2171	WT_specific	Grhl1	36049	TRUE
chr12	25277873	25278669	Foxp3 2172	WT_specific	Grhl1	-13055	TRUE
chr12	25285190	25285622	Foxp3 2173	WT_specific	Grhl1	-20008	TRUE
chr12	25839890	25840617	Foxp3 2174	WT_specific	Id2	-59660	TRUE
chr12	25874929	25875570	Foxp3 2175	WT_specific	Id2	-94613	TRUE
chr12	25875947	25876418	Foxp3 2176	WT_specific	Id2	-95461	FALSE
chr12	25936273	25936699	Foxp3 2177	WT_specific	Id2	-155742	TRUE
chr12	25985613	25985992	Foxp3 2178	WT_specific	Id2	-205035	FALSE
chr12	26871160	26871656	Foxp3 2179	WT_specific	Rnf144a	228465	TRUE
chr4	32350172	32351805	Foxp3 218	shared	Gm11932	-13069	TRUE
chr12	32635330	32635621	Foxp3 2180	WT_specific	Hbp1	-221	TRUE
chr12	33805157	33805385	Foxp3 2181	WT_specific	Gm16267	-8558	FALSE
chr12	33816293	33816718	Foxp3 2182	WT_specific	F730043M19Rik	7768	TRUE
chr12	33816847	33817387	Foxp3 2183	WT_specific	F730043M19Rik	7099	TRUE
chr12	33844779	33845044	Foxp3 2184	WT_specific	Atxn7l1	-12374	TRUE
chr12	33845240	33845665	Foxp3 2185	WT_specific	Atxn7l1	-12995	TRUE
chr12	33856921	33857178	Foxp3 2186	WT_specific	Atxn7l1	-24508	FALSE
chr12	33857836	33858648	Foxp3 2187	WT_specific	Atxn7l1	-25978	TRUE
chr12	33860414	33860978	Foxp3 2188	WT_specific	Atxn7l1	-28308	TRUE
chr12	33861058	33861397	Foxp3 2189	WT_specific	Atxn7l1	-28727	TRUE
chr4	32375164	32375835	Foxp3 219	shared	Gm11932	-37099	TRUE
chr12	33866907	33867819	Foxp3 2190	WT_specific	Atxn7l1	-35149	TRUE
chr12	34001090	34002150	Foxp3 2191	WT_specific	Atxn7l1	-1880	TRUE
chr12	35706778	35707151	Foxp3 2192	WT_specific	7SK	-21922	FALSE
chr12	36942927	36943338	Foxp3 2193	WT_specific	1700108M19Rik	1451	TRUE
chr12	41108445	41108773	Foxp3 2194	WT_specific	Zfp277	-38785	TRUE
chr12	51941759	51942052	Foxp3 2195	WT_specific	Prkd1	-191842	FALSE
chr12	52945735	52946202	Foxp3 2196	WT_specific	Hectd1	-15679	TRUE
chr12	52958351	52959188	Foxp3 2197	WT_specific	Hectd1	-28665	FALSE
chr12	52959693	52959976	Foxp3 2198	WT_specific	Gm17603	29026	TRUE
chr12	52972497	52973063	Foxp3 2199	WT_specific	Gm17603	15939	TRUE
chr1	89725624	89727047	Foxp3 22	shared	Sag	-3984	TRUE
chr4	32422055	32423040	Foxp3 220	shared	Bach2	81370	TRUE
chr12	54156761	54157015	Foxp3 2200	WT_specific	n-R5s58	-9202	FALSE
chr12	55394299	55395143	Foxp3 2201	WT_specific	U1	-53256	TRUE
chr12	56107030	56107715	Foxp3 2202	WT_specific	Baz1a	-7626	FALSE
chr12	56403805	56404619	Foxp3 2203	WT_specific	Ppp2r3c	-632	TRUE
chr12	56547873	56548648	Foxp3 2204	WT_specific	Psma6	-40278	TRUE
chr12	56600297	56600773	Foxp3 2205	WT_specific	Nfkbia	-7139	TRUE
chr12	70481225	70481496	Foxp3 2206	WT_specific	Gm9887	-8051	FALSE
chr12	70487159	70487425	Foxp3 2207	WT_specific	Gm9887	-13980	TRUE
chr12	70521515	70521814	Foxp3 2208	WT_specific	Gm9887	-48369	TRUE
chr12	70548491	70549702	Foxp3 2209	WT_specific	Gm9887	-76257	TRUE
chr4	32430090	32431633	Foxp3 221	shared	Bach2	72777	TRUE
chr12	70561505	70561762	Foxp3 2210	WT_specific	Gm9887	-88317	FALSE
chr12	70571885	70572232	Foxp3 2211	WT_specific	AC153658.1	90092	FALSE
chr12	70602664	70603309	Foxp3 2212	WT_specific	AC153658.1	59015	TRUE
chr12	70616189	70617164	Foxp3 2213	WT_specific	AC153658.1	45160	FALSE
chr12	70617278	70618031	Foxp3 2214	WT_specific	AC153658.1	44293	TRUE
chr12	70638185	70640364	Foxp3 2215	WT_specific	AC153658.1	21960	TRUE
chr12	70641016	70641352	Foxp3 2216	WT_specific	AC153658.1	20972	FALSE
chr12	70836165	70836427	Foxp3 2217	WT_specific	Atp5s	-10478	FALSE
chr12	70944912	70945299	Foxp3 2218	WT_specific	4931403G20Rik	3323	FALSE
chr12	70964497	70964863	Foxp3 2219	WT_specific	Map4k5	-7452	TRUE
chr4	32474400	32475328	Foxp3 222	shared	Bach2	29082	TRUE
chr12	71237015	71237539	Foxp3 2220	WT_specific	Abhd12b	17590	TRUE
chr12	71249034	71249453	Foxp3 2221	WT_specific	Abhd12b	5676	TRUE
chr12	72098069	72098507	Foxp3 2222	WT_specific	Psma3	-10628	FALSE
chr12	72101318	72101736	Foxp3 2223	WT_specific	Psma3	-13857	TRUE
chr12	72153382	72153680	Foxp3 2224	WT_specific	Arid4a	-4352	FALSE
chr12	74622473	74622765	Foxp3 2225	WT_specific	Tmem30b	24617	FALSE
chr12	74693171	74693549	Foxp3 2226	WT_specific	Prkch	-7719	FALSE
chr12	74693736	74694019	Foxp3 2227	WT_specific	Prkch	-8189	FALSE
chr12	74701516	74702018	Foxp3 2228	WT_specific	Prkch	-16188	FALSE
chr12	74703007	74704242	Foxp3 2229	WT_specific	Prkch	-18412	FALSE
chr4	32492379	32493309	Foxp3 223	shared	Bach2	11101	TRUE
chr12	74707620	74709641	Foxp3 2230	WT_specific	Prkch	-23811	FALSE
chr12	74713380	74713951	Foxp3 2231	WT_specific	Prkch	-28121	FALSE
chr12	74726254	74727755	Foxp3 2232	WT_specific	Prkch	-41925	TRUE
chr12	74728796	74729199	Foxp3 2233	WT_specific	Prkch	-43369	FALSE
chr12	74731382	74731885	Foxp3 2234	WT_specific	Prkch	-46055	TRUE
chr12	74747485	74747845	Foxp3 2235	WT_specific	Prkch	-62015	FALSE
chr12	74757484	74758127	Foxp3 2236	WT_specific	Prkch	-72297	TRUE
chr12	74760290	74760532	Foxp3 2237	WT_specific	Prkch	-74702	FALSE
chr12	74764573	74764837	Foxp3 2238	WT_specific	Prkch	-79007	TRUE
chr12	74778065	74778368	Foxp3 2239	WT_specific	Prkch	-92538	FALSE
chr4	32511208	32512468	Foxp3 224	shared	Bach2	-8058	TRUE
chr12	74779863	74780496	Foxp3 2240	WT_specific	Prkch	-94666	TRUE
chr12	74788052	74788738	Foxp3 2241	WT_specific	Prkch	-102908	TRUE
chr12	74788861	74789199	Foxp3 2242	WT_specific	Prkch	-103369	TRUE
chr12	74793394	74793766	Foxp3 2243	WT_specific	Prkch	-107936	TRUE
chr12	74794956	74795245	Foxp3 2244	WT_specific	Prkch	-109415	FALSE
chr12	74799360	74800432	Foxp3 2245	WT_specific	Prkch	-114602	TRUE
chr12	74800626	74800965	Foxp3 2246	WT_specific	Prkch	-115135	TRUE
chr12	74801037	74801336	Foxp3 2247	WT_specific	Prkch	-115506	FALSE
chr12	74809915	74810240	Foxp3 2248	WT_specific	Prkch	-124410	TRUE
chr12	74811628	74812158	Foxp3 2249	WT_specific	Prkch	-126328	TRUE
chr4	40728260	40729583	Foxp3 225	shared	Gm12396	-6986	TRUE
chr12	74812323	74814765	Foxp3 2250	WT_specific	Prkch	-128935	TRUE
chr12	74820429	74821102	Foxp3 2251	WT_specific	Prkch	-135272	TRUE
chr12	74943095	74943730	Foxp3 2252	WT_specific	Hif1a	58632	TRUE
chr12	74988058	74988390	Foxp3 2253	WT_specific	Hif1a	13972	FALSE
chr12	74991049	74991519	Foxp3 2254	WT_specific	Hif1a	10843	FALSE
chr12	76827462	76827706	Foxp3 2255	WT_specific	Sgpp1	8971	TRUE
chr12	76828485	76828798	Foxp3 2256	WT_specific	Sgpp1	7879	TRUE
chr12	77187316	77187766	Foxp3 2257	WT_specific	Syne2	981	TRUE
chr12	77446403	77447504	Foxp3 2258	WT_specific	Zbtb25	10623	TRUE
chr12	77462812	77463545	Foxp3 2259	WT_specific	Zbtb25	-5418	TRUE
chr4	40780299	40781094	Foxp3 226	shared	Mir5123	16077	TRUE
chr12	77478101	77479228	Foxp3 2260	WT_specific	Zbtb1	-7975	FALSE
chr12	78160921	78161418	Foxp3 2261	WT_specific	AC133174.1	56001	TRUE
chr12	78185113	78185435	Foxp3 2262	WT_specific	AC133174.1	31984	FALSE
chr12	78231334	78231847	Foxp3 2263	WT_specific	AC133174.1	-14428	TRUE
chr12	79050625	79050967	Foxp3 2264	WT_specific	SNORA17	-135171	TRUE
chr12	79156926	79157315	Foxp3 2265	WT_specific	SNORA17	109218	TRUE
chr12	80531303	80531591	Foxp3 2266	WT_specific	Rad51l1	-116597	TRUE
chr12	80539240	80539966	Foxp3 2267	WT_specific	Rad51l1	-124972	TRUE
chr12	80729613	80730152	Foxp3 2268	WT_specific	Rad51l1	-315158	TRUE
chr12	80746703	80747044	Foxp3 2269	WT_specific	Rad51l1	-332050	TRUE
chr4	40785639	40786884	Foxp3 227	shared	Mir5123	10287	TRUE
chr12	80749554	80750028	Foxp3 2270	WT_specific	Rad51l1	-335034	FALSE
chr12	80793418	80794082	Foxp3 2271	WT_specific	Rad51l1	-379088	TRUE
chr12	80861129	80861554	Foxp3 2272	WT_specific	Gm17591	347467	FALSE
chr12	81165761	81166202	Foxp3 2273	WT_specific	Gm17591	42819	TRUE
chr12	81374017	81374686	Foxp3 2274	WT_specific	CT030161.1	61	TRUE
chr12	81375208	81375633	Foxp3 2275	WT_specific	CT030161.1	-886	FALSE
chr12	81893848	81894148	Foxp3 2276	WT_specific	4933426M11Rik	-2602	TRUE
chr12	81988014	81988673	Foxp3 2277	WT_specific	Gm17461	-12	TRUE
chr12	83291441	83292152	Foxp3 2278	WT_specific	Sipa1l1	-20988	FALSE
chr12	85211816	85212133	Foxp3 2279	WT_specific	Numb	5615	FALSE
chr4	59273506	59274638	Foxp3 228	shared	Gm12596	-1715	TRUE
chr12	85567865	85568183	Foxp3 2280	WT_specific	C130039O16Rik	-8352	FALSE
chr12	85586472	85587302	Foxp3 2281	WT_specific	Gm5436	12621	TRUE
chr12	86352518	86352763	Foxp3 2282	WT_specific	Ylpm1	2888	FALSE
chr12	86723944	86724358	Foxp3 2283	WT_specific	Tmed10	-8691	TRUE
chr12	86756874	86757118	Foxp3 2284	WT_specific	Tmed10	-41451	FALSE
chr12	86782578	86782999	Foxp3 2285	WT_specific	Fos	31841	FALSE
chr12	86787687	86788295	Foxp3 2286	WT_specific	Fos	26545	TRUE
chr12	86798158	86798410	Foxp3 2287	WT_specific	Fos	16430	FALSE
chr12	86832820	86833562	Foxp3 2288	WT_specific	Fos	-17701	TRUE
chr12	86965486	86965787	Foxp3 2289	WT_specific	Jdp2	-24819	TRUE
chr4	63560009	63560557	Foxp3 229	shared	Rpl17-ps4	-3401	TRUE
chr12	87007038	87007371	Foxp3 2290	WT_specific	Batf	20248	TRUE
chr12	87070350	87071084	Foxp3 2291	WT_specific	n-R5s64	-11539	TRUE
chr12	88148653	88149159	Foxp3 2292	WT_specific	7SK	1748	TRUE
chr12	88174047	88174499	Foxp3 2293	WT_specific	7SK	-23592	FALSE
chr12	88231887	88232286	Foxp3 2294	WT_specific	Gm17422	1231	FALSE
chr12	88232545	88233136	Foxp3 2295	WT_specific	Gm17422	381	TRUE
chr12	88234841	88235560	Foxp3 2296	WT_specific	Gm17422	-2043	TRUE
chr12	88247345	88248018	Foxp3 2297	WT_specific	Gm17422	-14501	TRUE
chr12	88795684	88796082	Foxp3 2298	WT_specific	2700073G19Rik	-11115	FALSE
chr12	92422159	92422431	Foxp3 2299	WT_specific	4930534B04Rik	-219	TRUE
chr1	90472463	90473407	Foxp3 23	shared	Glrp1	-66946	TRUE
chr4	86531396	86532486	Foxp3 230	shared	Acer2	-12168	TRUE
chr12	99454055	99454323	Foxp3 2300	WT_specific	Galc	27351	TRUE
chr12	100560365	100560665	Foxp3 2301	WT_specific	3300002A11Rik	18699	TRUE
chr12	100637386	100637729	Foxp3 2302	WT_specific	Foxn3	-5722	FALSE
chr12	100792977	100793203	Foxp3 2303	WT_specific	Gm16956	8848	FALSE
chr12	100878195	100878974	Foxp3 2304	WT_specific	Gm16956	-76923	TRUE
chr12	100932641	100933036	Foxp3 2305	WT_specific	Gm16956	-130985	FALSE
chr12	102087620	102088250	Foxp3 2306	WT_specific	Gm8482	14399	TRUE
chr12	102120958	102121765	Foxp3 2307	WT_specific	9030617O03Rik	2325	TRUE
chr12	102121896	102122201	Foxp3 2308	WT_specific	9030617O03Rik	1889	TRUE
chr12	102124410	102125441	Foxp3 2309	WT_specific	9030617O03Rik	-1351	FALSE
chr4	87629130	87629807	Foxp3 231	shared	Mllt3	48910	FALSE
chr12	102125845	102126561	Foxp3 2310	WT_specific	Gpr68	-472	TRUE
chr12	102129161	102129636	Foxp3 2311	WT_specific	Gpr68	-3547	FALSE
chr12	102231861	102233468	Foxp3 2312	WT_specific	Mir1190	26535	TRUE
chr12	102243633	102243950	Foxp3 2313	WT_specific	Mir1190	16053	TRUE
chr12	102246127	102247109	Foxp3 2314	WT_specific	Mir1190	12894	TRUE
chr12	103866311	103867197	Foxp3 2315	WT_specific	Mir1936	56033	TRUE
chr12	103928140	103928714	Foxp3 2316	WT_specific	Mir1936	-5484	TRUE
chr12	103963465	103964072	Foxp3 2317	WT_specific	Moap1	17769	TRUE
chr12	104569838	104570739	Foxp3 2318	WT_specific	Asb2	3055	TRUE
chr12	104579143	104579724	Foxp3 2319	WT_specific	Asb2	-3141	TRUE
chr4	88510220	88510794	Foxp3 232	shared	4930553M12Rik	3489	TRUE
chr12	104672582	104673291	Foxp3 2320	WT_specific	Ifi27l1	-789	TRUE
chr12	105300221	105300677	Foxp3 2321	WT_specific	Serpina12	-18024	TRUE
chr12	106251332	106252229	Foxp3 2322	WT_specific	4831426I19Rik	-4210	TRUE
chr12	107277705	107278246	Foxp3 2323	WT_specific	Vrk1	-29773	FALSE
chr12	107547234	107547746	Foxp3 2324	WT_specific	Gm17032	17832	TRUE
chr12	108356937	108357579	Foxp3 2325	WT_specific	Gm16085	10312	TRUE
chr12	108365641	108366415	Foxp3 2326	WT_specific	Gm16085	1476	TRUE
chr12	108367326	108367735	Foxp3 2327	WT_specific	Gm16085	156	FALSE
chr12	108368775	108369106	Foxp3 2328	WT_specific	Gm16085	-1215	FALSE
chr12	108369750	108370020	Foxp3 2329	WT_specific	Gm16085	-2129	FALSE
chr4	94772038	94774144	Foxp3 233	shared	BC042782	-8749	TRUE
chr12	108382586	108383060	Foxp3 2330	WT_specific	Gm16085	-15169	FALSE
chr12	108383244	108383711	Foxp3 2331	WT_specific	Gm16084	14706	TRUE
chr12	108397519	108397893	Foxp3 2332	WT_specific	Gm16084	524	TRUE
chr12	108398115	108398897	Foxp3 2333	WT_specific	Gm16084	-480	TRUE
chr12	108883541	108884459	Foxp3 2334	WT_specific	Gm9006	-33249	TRUE
chr12	108969023	108969427	Foxp3 2335	WT_specific	4930465M20Rik	4271	TRUE
chr12	109012453	109013004	Foxp3 2336	WT_specific	Gm15208	9247	FALSE
chr12	109054764	109055072	Foxp3 2337	WT_specific	Gm15208	-32821	TRUE
chr12	109230885	109232038	Foxp3 2338	WT_specific	Bcl11b	9586	TRUE
chr12	109232802	109234124	Foxp3 2339	WT_specific	Bcl11b	7500	FALSE
chr4	94969705	94970551	Foxp3 234	shared	Gm12708	-110498	TRUE
chr12	109691570	109692282	Foxp3 2340	WT_specific	Gm15636	-12802	TRUE
chr12	109872562	109872840	Foxp3 2341	WT_specific	Evl	1123	FALSE
chr12	109873066	109873610	Foxp3 2342	WT_specific	Evl	353	FALSE
chr12	109873979	109874225	Foxp3 2343	WT_specific	Evl	-262	TRUE
chr12	109875677	109876155	Foxp3 2344	WT_specific	Evl	-2192	TRUE
chr12	111732656	111733108	Foxp3 2345	WT_specific	Ppp2r5c	-9159	TRUE
chr12	111742779	111744091	Foxp3 2346	WT_specific	Ppp2r5c	-20142	TRUE
chr12	112309745	112310231	Foxp3 2347	WT_specific	Rcor1	-32406	TRUE
chr12	112797928	112798822	Foxp3 2348	WT_specific	2810029C07Rik	13791	TRUE
chr12	114087335	114087641	Foxp3 2349	WT_specific	Gpr132	11486	FALSE
chr4	100860015	100860443	Foxp3 235	shared	U6	-1074	TRUE
chr12	114091930	114092290	Foxp3 2350	WT_specific	Gpr132	6837	FALSE
chr12	114092388	114092724	Foxp3 2351	WT_specific	Gpr132	6403	FALSE
chr12	114095466	114097572	Foxp3 2352	WT_specific	Gpr132	1555	FALSE
chr12	114455522	114456212	Foxp3 2353	WT_specific	U6	-3852	TRUE
chr12	117383606	117384388	Foxp3 2354	WT_specific	RP24-386J17.2	-7267	TRUE
chr12	119614268	119614748	Foxp3 2355	WT_specific	Sp4	-74835	TRUE
chr13	6632519	6633937	Foxp3 2356	WT_specific	Pfkp	1959	TRUE
chr13	6636688	6636943	Foxp3 2357	WT_specific	Pfkp	-1047	FALSE
chr13	8841169	8841432	Foxp3 2358	WT_specific	Wdr37	-4952	FALSE
chr13	12505163	12505561	Foxp3 2359	WT_specific	Heatr1	-17896	FALSE
chr4	100874936	100875414	Foxp3 236	shared	Gm12785	7778	TRUE
chr13	13656535	13657146	Foxp3 2360	WT_specific	Lyst	25530	TRUE
chr13	20230953	20231217	Foxp3 2361	WT_specific	Elmo1	46077	FALSE
chr13	21261699	21262210	Foxp3 2362	WT_specific	Trim27	9104	TRUE
chr13	21870916	21871220	Foxp3 2363	WT_specific	Hist1h1b	1274	TRUE
chr13	21871764	21872383	Foxp3 2364	WT_specific	Hist1h1b	111	TRUE
chr13	22065967	22066551	Foxp3 2365	WT_specific	Pom121l2	6512	TRUE
chr13	22111806	22112651	Foxp3 2366	WT_specific	Gm11291	-4092	TRUE
chr13	22118302	22118793	Foxp3 2367	WT_specific	Gm11292	-225	TRUE
chr13	22140816	22141255	Foxp3 2368	WT_specific	U3	4750	FALSE
chr13	23522629	23522960	Foxp3 2369	WT_specific	C230035I16Rik	-265	TRUE
chr4	102241792	102242266	Foxp3 237	shared	Pde4b	434	TRUE
chr13	23524443	23524698	Foxp3 2370	WT_specific	C230035I16Rik	-1807	TRUE
chr13	24499492	24499856	Foxp3 2371	WT_specific	Gm11344	2453	FALSE
chr13	24593368	24593759	Foxp3 2372	WT_specific	U6	-15126	TRUE
chr13	24638683	24639115	Foxp3 2373	WT_specific	Fam65b	34943	TRUE
chr13	24639373	24640176	Foxp3 2374	WT_specific	Fam65b	33882	TRUE
chr13	24695207	24696248	Foxp3 2375	WT_specific	Gm11346	317	TRUE
chr13	24696554	24697363	Foxp3 2376	WT_specific	Gm11346	-798	TRUE
chr13	24704919	24705704	Foxp3 2377	WT_specific	Fam65b	775	TRUE
chr13	24706304	24706750	Foxp3 2378	WT_specific	Fam65b	-254	TRUE
chr13	24706866	24707239	Foxp3 2379	WT_specific	Fam65b	-743	FALSE
chr4	102243118	102243590	Foxp3 238	shared	Pde4b	-890	TRUE
chr13	24709320	24709654	Foxp3 2380	WT_specific	Fam65b	-3158	TRUE
chr13	24731394	24731844	Foxp3 2381	WT_specific	Fam65b	-1262	TRUE
chr13	24751262	24751492	Foxp3 2382	WT_specific	Fam65b	13316	FALSE
chr13	24868372	24868727	Foxp3 2383	WT_specific	Gmnn	-14935	TRUE
chr13	28644935	28645350	Foxp3 2384	WT_specific	2610307P16Rik	-32373	FALSE
chr13	30258879	30259241	Foxp3 2385	WT_specific	Gm11366	14344	TRUE
chr13	30853020	30853687	Foxp3 2386	WT_specific	Irf4	-12592	TRUE
chr13	30868771	30869047	Foxp3 2387	WT_specific	Irf4	-27952	FALSE
chr13	30904787	30905595	Foxp3 2388	WT_specific	Irf4	-64500	TRUE
chr13	30924570	30925527	Foxp3 2389	WT_specific	Irf4	-84432	TRUE
chr4	107990697	107991646	Foxp3 239	shared	Gm12740	3297	TRUE
chr13	31025770	31026124	Foxp3 2390	WT_specific	Hus1b	13504	TRUE
chr13	33057168	33057731	Foxp3 2391	WT_specific	Serpinb6b	-359	TRUE
chr13	33095961	33096661	Foxp3 2392	WT_specific	Serpinb9	-251	TRUE
chr13	34246219	34246803	Foxp3 2393	WT_specific	Psmg4	8030	TRUE
chr13	35899865	35900137	Foxp3 2394	WT_specific	Cdyl	6480	TRUE
chr13	36881864	36882276	Foxp3 2395	WT_specific	Nrn1	-55930	TRUE
chr13	37632261	37632528	Foxp3 2396	WT_specific	Ly86	-195314	FALSE
chr13	41468129	41468915	Foxp3 2397	WT_specific	Gm17260	-13575	TRUE
chr13	41582347	41582915	Foxp3 2398	WT_specific	Nedd9	-226	TRUE
chr13	42198507	42198753	Foxp3 2399	WT_specific	Hivep1	-51363	TRUE
chr1	90480522	90481525	Foxp3 24	shared	Glrp1	-75064	TRUE
chr4	120647072	120648347	Foxp3 240	shared	Smap2	-34	TRUE
chr13	42199210	42199542	Foxp3 2400	WT_specific	Hivep1	-52152	TRUE
chr13	43272404	43272764	Foxp3 2401	WT_specific	Tbc1d7	-6036	TRUE
chr13	43310540	43311379	Foxp3 2402	WT_specific	Tbc1d7	-44651	TRUE
chr13	43311550	43311800	Foxp3 2403	WT_specific	Tbc1d7	-45072	TRUE
chr13	43339053	43340013	Foxp3 2404	WT_specific	Gfod1	59528	TRUE
chr13	43345401	43346130	Foxp3 2405	WT_specific	Gfod1	53411	TRUE
chr13	43569320	43569961	Foxp3 2406	WT_specific	Ranbp9	4300	FALSE
chr13	43845922	43846304	Foxp3 2407	WT_specific	Cd83	34172	TRUE
chr13	43856114	43856455	Foxp3 2408	WT_specific	Cd83	24021	FALSE
chr13	43864804	43865153	Foxp3 2409	WT_specific	Cd83	15323	FALSE
chr4	122548608	122549214	Foxp3 241	shared	Cap1	-7339	TRUE
chr13	43899868	43900300	Foxp3 2410	WT_specific	Cd83	-19746	FALSE
chr13	44412168	44412537	Foxp3 2411	WT_specific	Gm5083	-195874	FALSE
chr13	44416074	44416401	Foxp3 2412	WT_specific	Gm5083	-199738	TRUE
chr13	44593411	44593755	Foxp3 2413	WT_specific	Jarid2	231088	FALSE
chr13	44629828	44630370	Foxp3 2414	WT_specific	Jarid2	194473	FALSE
chr13	45779942	45780339	Foxp3 2415	WT_specific	Gmpr	-146161	FALSE
chr13	45935350	45935672	Foxp3 2416	WT_specific	Atxn1	124654	TRUE
chr13	45945015	45945360	Foxp3 2417	WT_specific	Atxn1	114966	FALSE
chr13	45977911	45978846	Foxp3 2418	WT_specific	Atxn1	81480	TRUE
chr13	45979359	45979687	Foxp3 2419	WT_specific	Atxn1	80639	TRUE
chr4	122610495	122611105	Foxp3 242	shared	Gm12891	-8029	TRUE
chr13	45984433	45984847	Foxp3 2420	WT_specific	Atxn1	75479	TRUE
chr13	45999091	45999553	Foxp3 2421	WT_specific	Atxn1	60773	TRUE
chr13	46001703	46002733	Foxp3 2422	WT_specific	Atxn1	57593	TRUE
chr13	46020045	46021026	Foxp3 2423	WT_specific	Atxn1	39300	TRUE
chr13	46026521	46026799	Foxp3 2424	WT_specific	Atxn1	33527	FALSE
chr13	46027732	46028334	Foxp3 2425	WT_specific	Atxn1	31992	TRUE
chr13	46124140	46124383	Foxp3 2426	WT_specific	5033430I15Rik	-63761	FALSE
chr13	46435381	46435678	Foxp3 2427	WT_specific	Gm1574	-66588	TRUE
chr13	48610271	48611034	Foxp3 2428	WT_specific	A830005F24Rik	-2095	FALSE
chr13	49396389	49396919	Foxp3 2429	WT_specific	Fgd3	-2530	TRUE
chr4	128709442	128710489	Foxp3 243	shared	1700086P04Rik	24738	TRUE
chr13	49402707	49403197	Foxp3 2430	WT_specific	Fgd3	1412	TRUE
chr13	49403378	49404590	Foxp3 2431	WT_specific	Fgd3	19	TRUE
chr13	51824808	51825332	Foxp3 2432	WT_specific	Sema4d	4800	TRUE
chr13	51858464	51859076	Foxp3 2433	WT_specific	AC126547.1	1587	TRUE
chr13	51910732	51911458	Foxp3 2434	WT_specific	Sema4d	-22342	TRUE
chr13	51982142	51982395	Foxp3 2435	WT_specific	Gadd45g	-40282	FALSE
chr13	52059796	52060274	Foxp3 2436	WT_specific	Gm16767	8309	TRUE
chr13	52064758	52065770	Foxp3 2437	WT_specific	Gm16767	2813	TRUE
chr13	52090536	52091157	Foxp3 2438	WT_specific	Gm16767	-22574	FALSE
chr13	52888682	52889360	Foxp3 2439	WT_specific	Auh	125241	TRUE
chr4	128710604	128711132	Foxp3 244	shared	1700086P04Rik	24095	TRUE
chr13	52896446	52896907	Foxp3 2440	WT_specific	Auh	117694	TRUE
chr13	52905172	52905513	Foxp3 2441	WT_specific	Auh	109088	FALSE
chr13	52907000	52907701	Foxp3 2442	WT_specific	Auh	106900	FALSE
chr13	52918132	52918622	Foxp3 2443	WT_specific	Auh	95979	TRUE
chr13	52923354	52923817	Foxp3 2444	WT_specific	Auh	90784	TRUE
chr13	53008152	53008479	Foxp3 2445	WT_specific	Auh	6122	FALSE
chr13	53017441	53017678	Foxp3 2446	WT_specific	Auh	1535	TRUE
chr13	53084383	53084693	Foxp3 2447	WT_specific	Nfil3	-8251	FALSE
chr13	54283675	54284164	Foxp3 2448	WT_specific	Hrh2	3334	TRUE
chr13	55123633	55124627	Foxp3 2449	WT_specific	Hk3	-1881	TRUE
chr4	129252281	129253070	Foxp3 245	shared	Lck	-2185	TRUE
chr13	55469677	55469891	Foxp3 2450	WT_specific	Rgs14	1202	FALSE
chr13	55533786	55535274	Foxp3 2451	WT_specific	F12	-7120	TRUE
chr13	55539205	55539774	Foxp3 2452	WT_specific	Grk6	6921	FALSE
chr13	55774423	55774819	Foxp3 2453	WT_specific	B230219D22Rik	19666	TRUE
chr13	56253105	56253438	Foxp3 2454	WT_specific	H2afy	-15716	TRUE
chr13	56577970	56578401	Foxp3 2455	WT_specific	Il9	5206	TRUE
chr13	59943013	59943321	Foxp3 2456	WT_specific	Zcchc6	-18813	FALSE
chr13	60839412	60840025	Foxp3 2457	WT_specific	BC051665	47697	TRUE
chr13	63324305	63324811	Foxp3 2458	WT_specific	2010111I01Rik	49766	TRUE
chr13	63347979	63348271	Foxp3 2459	WT_specific	2010111I01Rik	26306	FALSE
chr4	129436973	129437614	Foxp3 246	shared	Gm12967	1546	FALSE
chr13	63348982	63349281	Foxp3 2460	WT_specific	2010111I01Rik	25296	TRUE
chr13	63349594	63349875	Foxp3 2461	WT_specific	2010111I01Rik	24702	FALSE
chr13	63350343	63350991	Foxp3 2462	WT_specific	2010111I01Rik	23586	TRUE
chr13	63351089	63351582	Foxp3 2463	WT_specific	2010111I01Rik	22995	TRUE
chr13	67229143	67229566	Foxp3 2464	WT_specific	Zfp759	-402	TRUE
chr13	67295432	67296009	Foxp3 2465	WT_specific	Zfp455	-538	TRUE
chr13	67476075	67476836	Foxp3 2466	WT_specific	Zfp456	-90	TRUE
chr13	67551861	67552622	Foxp3 2467	WT_specific	Zfp874a	-62	TRUE
chr13	67584808	67585433	Foxp3 2468	WT_specific	Zfp874b	-244	TRUE
chr13	74599848	74600860	Foxp3 2469	WT_specific	Zfp825	19531	TRUE
chr4	129470633	129471999	Foxp3 247	shared	Ptp4a2	16464	TRUE
chr13	74631079	74632103	Foxp3 2470	WT_specific	Zfp825	-11712	TRUE
chr13	74701481	74702013	Foxp3 2471	WT_specific	Erap1	75307	TRUE
chr13	76718819	76719050	Foxp3 2472	WT_specific	Mctp1	-61	TRUE
chr13	85618406	85618643	Foxp3 2473	WT_specific	Rasa1	-189552	TRUE
chr13	85647300	85648010	Foxp3 2474	WT_specific	Rasa1	-218919	TRUE
chr13	93864884	93865633	Foxp3 2475	WT_specific	Cmya5	49046	TRUE
chr13	96455639	96455949	Foxp3 2476	WT_specific	F2rl2	10859	TRUE
chr13	96456277	96456609	Foxp3 2477	WT_specific	F2rl2	10199	TRUE
chr13	96466795	96467156	Foxp3 2478	WT_specific	F2rl2	-348	TRUE
chr13	96482532	96482851	Foxp3 2479	WT_specific	F2rl2	-16043	TRUE
chr4	129784499	129785397	Foxp3 248	shared	Pef1	-597	TRUE
chr13	96607205	96607562	Foxp3 2480	WT_specific	Iqgap2	54315	FALSE
chr13	96682021	96682911	Foxp3 2481	WT_specific	U1	-15836	FALSE
chr13	96730011	96730533	Foxp3 2482	WT_specific	Sv2c	29236	TRUE
chr13	96730957	96731516	Foxp3 2483	WT_specific	Sv2c	28253	TRUE
chr13	96734417	96734682	Foxp3 2484	WT_specific	Sv2c	25087	TRUE
chr13	96757979	96758555	Foxp3 2485	WT_specific	Sv2c	1214	TRUE
chr13	97201629	97202051	Foxp3 2486	WT_specific	Ankdd1b	39064	TRUE
chr13	97257284	97257768	Foxp3 2487	WT_specific	Gm17622	2920	TRUE
chr13	97728857	97729088	Foxp3 2488	WT_specific	Gcnt4	-34444	FALSE
chr13	97753575	97754041	Foxp3 2489	WT_specific	1700029F12Rik	50276	TRUE
chr4	130455414	130456212	Foxp3 249	shared	Laptm5	12828	TRUE
chr13	97975095	97975313	Foxp3 2490	WT_specific	Hexb	-7001	TRUE
chr13	97977503	97978589	Foxp3 2491	WT_specific	Hexb	-10277	TRUE
chr13	102428892	102429474	Foxp3 2492	WT_specific	Gm11016	23451	TRUE
chr13	102469820	102470572	Foxp3 2493	WT_specific	Pik3r1	-6226	FALSE
chr13	102472094	102472558	Foxp3 2494	WT_specific	Pik3r1	-8212	TRUE
chr13	102476451	102476810	Foxp3 2495	WT_specific	Pik3r1	-12464	TRUE
chr13	102476964	102477287	Foxp3 2496	WT_specific	Pik3r1	-12941	TRUE
chr13	102489045	102489468	Foxp3 2497	WT_specific	Pik3r1	-25122	TRUE
chr13	105082451	105082709	Foxp3 2498	WT_specific	Adamts6	-4756	FALSE
chr13	105367463	105368298	Foxp3 2499	WT_specific	2610204G07Rik	106713	TRUE
chr1	94015672	94016364	Foxp3 25	shared	Hdac4	28606	TRUE
chr4	132304598	132305416	Foxp3 250	shared	Smpdl3b	7751	TRUE
chr13	105396864	105397205	Foxp3 2500	WT_specific	2610204G07Rik	77806	TRUE
chr13	105408065	105408442	Foxp3 2501	WT_specific	2610204G07Rik	66569	FALSE
chr13	105415650	105416192	Foxp3 2502	WT_specific	2610204G07Rik	58819	FALSE
chr13	105579027	105579319	Foxp3 2503	WT_specific	Srek1ip1	3245	FALSE
chr13	105727869	105728181	Foxp3 2504	WT_specific	Gm4938	-19322	TRUE
chr13	108358331	108358602	Foxp3 2505	WT_specific	Apoo-ps	-153785	TRUE
chr13	108628359	108628677	Foxp3 2506	WT_specific	AC165250.1	-9208	TRUE
chr13	108633136	108633447	Foxp3 2507	WT_specific	AC165250.1	-13978	FALSE
chr13	108694515	108695012	Foxp3 2508	WT_specific	Zswim6	-14754	FALSE
chr13	109087522	109088381	Foxp3 2509	WT_specific	Gm2822	18086	TRUE
chr4	132714601	132715287	Foxp3 251	shared	7SK	12342	TRUE
chr13	110002190	110002537	Foxp3 2510	WT_specific	Pde4d	48311	FALSE
chr13	110566119	110566508	Foxp3 2511	WT_specific	Pde4d	-19079	TRUE
chr13	110613911	110614294	Foxp3 2512	WT_specific	Pde4d	-66865	TRUE
chr13	110618747	110619137	Foxp3 2513	WT_specific	Pde4d	-71708	FALSE
chr13	110619724	110619997	Foxp3 2514	WT_specific	Pde4d	-72568	TRUE
chr13	110635456	110636010	Foxp3 2515	WT_specific	Pde4d	57300	TRUE
chr13	112586452	112587639	Foxp3 2516	WT_specific	Map3k1	10884	TRUE
chr13	112773504	112774721	Foxp3 2517	WT_specific	Gm15322	6953	TRUE
chr13	112791268	112792230	Foxp3 2518	WT_specific	Gm15323	3480	TRUE
chr13	112792782	112794022	Foxp3 2519	WT_specific	Gm15323	1688	TRUE
chr4	132717634	132718487	Foxp3 252	shared	7SK	9142	TRUE
chr13	113078295	113079237	Foxp3 2520	WT_specific	Ankrd55	-511	TRUE
chr13	113079506	113079996	Foxp3 2521	WT_specific	Ankrd55	-1270	TRUE
chr13	113080252	113080596	Foxp3 2522	WT_specific	U2	733	FALSE
chr13	113081371	113081594	Foxp3 2523	WT_specific	U2	-265	FALSE
chr13	113175639	113175974	Foxp3 2524	WT_specific	Ankrd55	-67312	TRUE
chr13	113178036	113178416	Foxp3 2525	WT_specific	Ankrd55	-69754	TRUE
chr13	113206199	113206580	Foxp3 2526	WT_specific	Il6st	58636	FALSE
chr13	113207364	113207750	Foxp3 2527	WT_specific	Il6st	57466	TRUE
chr13	113214167	113214712	Foxp3 2528	WT_specific	Il6st	50504	TRUE
chr13	113215197	113215628	Foxp3 2529	WT_specific	Il6st	49588	TRUE
chr4	132725224	132726024	Foxp3 253	shared	7SK	1605	TRUE
chr13	113215698	113216046	Foxp3 2530	WT_specific	Il6st	49170	TRUE
chr13	113216368	113217052	Foxp3 2531	WT_specific	Il6st	48164	TRUE
chr13	113224224	113224857	Foxp3 2532	WT_specific	Il6st	40359	FALSE
chr13	113225466	113226134	Foxp3 2533	WT_specific	Il6st	39082	TRUE
chr13	113228320	113228734	Foxp3 2534	WT_specific	Il6st	36482	TRUE
chr13	113614309	113614539	Foxp3 2535	WT_specific	Ppap2a	-23408	TRUE
chr13	113988316	113988816	Foxp3 2536	WT_specific	Esm1	11051	TRUE
chr13	114364315	114365096	Foxp3 2537	WT_specific	Snx18	43657	TRUE
chr13	114381012	114381302	Foxp3 2538	WT_specific	Snx18	27451	FALSE
chr13	114391340	114391767	Foxp3 2539	WT_specific	Snx18	16986	TRUE
chr4	133176227	133177584	Foxp3 254	shared	Zdhhc18	-6102	TRUE
chr13	114659775	114660240	Foxp3 2540	WT_specific	Arl15	-75410	TRUE
chr13	115621189	115621531	Foxp3 2541	WT_specific	Mocs2	-12418	TRUE
chr13	115634802	115635682	Foxp3 2542	WT_specific	Mocs2	-26569	TRUE
chr13	117837095	117837551	Foxp3 2543	WT_specific	Parp8	-23228	TRUE
chr13	117984577	117984995	Foxp3 2544	WT_specific	Emb	24437	TRUE
chr13	117991530	117992431	Foxp3 2545	WT_specific	Emb	17001	TRUE
chr13	117999267	117999613	Foxp3 2546	WT_specific	Emb	9819	FALSE
chr13	117999927	118000702	Foxp3 2547	WT_specific	Emb	8730	TRUE
chr13	118031456	118031857	Foxp3 2548	WT_specific	Gm17509	-21975	TRUE
chr13	120251403	120252074	Foxp3 2549	WT_specific	4833420G17Rik	-508	TRUE
chr4	133285422	133286286	Foxp3 255	shared	Arid1a	-6492	TRUE
chr14	8822002	8822255	Foxp3 2550	WT_specific	Dnase1l3	4832	TRUE
chr14	8829819	8830154	Foxp3 2551	WT_specific	Dnase1l3	-3067	TRUE
chr14	11284952	11285347	Foxp3 2552	WT_specific	Fhit	625	TRUE
chr14	15465672	15466013	Foxp3 2553	WT_specific	Slc4a7	69526	TRUE
chr14	20781845	20782101	Foxp3 2554	WT_specific	Gng2	13814	TRUE
chr14	20803997	20805485	Foxp3 2555	WT_specific	Gng2	-8636	TRUE
chr14	21585122	21585572	Foxp3 2556	WT_specific	Camk2g	27704	TRUE
chr14	21742160	21742546	Foxp3 2557	WT_specific	Vcl	6109	FALSE
chr14	21851135	21851517	Foxp3 2558	WT_specific	Ap3m1	2271	TRUE
chr14	22342508	22342801	Foxp3 2559	WT_specific	Myst4	-6828	TRUE
chr4	133396586	133397790	Foxp3 256	shared	Rps6ka1	19055	TRUE
chr14	26676689	26677239	Foxp3 2560	WT_specific	Anxa11	-15570	TRUE
chr14	27807760	27808114	Foxp3 2561	WT_specific	Hesx1	5434	TRUE
chr14	27842800	27843159	Foxp3 2562	WT_specific	Il17rd	9028	TRUE
chr14	28005641	28006102	Foxp3 2563	WT_specific	Arhgef3	45123	TRUE
chr14	28041854	28043792	Foxp3 2564	WT_specific	Arhgef3	7433	TRUE
chr14	28047349	28047748	Foxp3 2565	WT_specific	Arhgef3	3477	TRUE
chr14	28048318	28048634	Foxp3 2566	WT_specific	Arhgef3	2591	FALSE
chr14	28049168	28049867	Foxp3 2567	WT_specific	Arhgef3	1358	TRUE
chr14	28050895	28051772	Foxp3 2568	WT_specific	Arhgef3	-547	TRUE
chr14	28052656	28053318	Foxp3 2569	WT_specific	Arhgef3	-2093	TRUE
chr4	133398051	133400008	Foxp3 257	shared	Rps6ka1	16837	TRUE
chr14	28061216	28061888	Foxp3 2570	WT_specific	Arhgef3	-10663	FALSE
chr14	28062858	28063261	Foxp3 2571	WT_specific	Arhgef3	-12036	TRUE
chr14	28064595	28065028	Foxp3 2572	WT_specific	Arhgef3	-13803	FALSE
chr14	28151515	28151853	Foxp3 2573	WT_specific	Arhgef3	-2582	FALSE
chr14	28154360	28154657	Foxp3 2574	WT_specific	Arhgef3	-5386	TRUE
chr14	28154748	28155051	Foxp3 2575	WT_specific	Arhgef3	-5780	TRUE
chr14	28158339	28159135	Foxp3 2576	WT_specific	Arhgef3	-9864	TRUE
chr14	28160881	28161583	Foxp3 2577	WT_specific	Arhgef3	-12312	FALSE
chr14	28163751	28164076	Foxp3 2578	WT_specific	Arhgef3	-14805	FALSE
chr14	28164228	28164883	Foxp3 2579	WT_specific	Arhgef3	-15612	TRUE
chr4	140503537	140504730	Foxp3 258	shared	Padi2	-2403	TRUE
chr14	28171309	28171663	Foxp3 2580	WT_specific	Arhgef3	-22392	TRUE
chr14	28189392	28189796	Foxp3 2581	WT_specific	AC154327.1	4240	TRUE
chr14	28197436	28197805	Foxp3 2582	WT_specific	AC154327.1	-3769	TRUE
chr14	28198965	28199434	Foxp3 2583	WT_specific	AC154327.1	-5398	FALSE
chr14	28207071	28207356	Foxp3 2584	WT_specific	AC154327.1	-13320	FALSE
chr14	28215689	28216353	Foxp3 2585	WT_specific	AC154327.1	-22317	TRUE
chr14	28218176	28219130	Foxp3 2586	WT_specific	D14Abb1e	22903	TRUE
chr14	32213434	32215049	Foxp3 2587	WT_specific	Sh3bp5	5522	TRUE
chr14	32496880	32497700	Foxp3 2588	WT_specific	Hacl1	-43228	TRUE
chr14	32594595	32594937	Foxp3 2589	WT_specific	Ankrd28	48664	TRUE
chr4	143002176	143003158	Foxp3 259	shared	Pramef8	-245	TRUE
chr14	32604173	32604561	Foxp3 2590	WT_specific	Ankrd28	39040	FALSE
chr14	37750328	37750568	Foxp3 2591	WT_specific	Gcap14	-1814	FALSE
chr14	37764944	37765366	Foxp3 2592	WT_specific	Gcap14	-16612	FALSE
chr14	41739783	41740526	Foxp3 2593	WT_specific	Sh2d4b	-33971	TRUE
chr14	41765086	41765351	Foxp3 2594	WT_specific	Tspan14	14745	FALSE
chr14	41771892	41772150	Foxp3 2595	WT_specific	Tspan14	7946	FALSE
chr14	41772217	41773120	Foxp3 2596	WT_specific	Tspan14	6976	TRUE
chr14	44055489	44055818	Foxp3 2597	WT_specific	Gm9597	8929	TRUE
chr14	45608793	45609521	Foxp3 2598	WT_specific	Ptger2	-1651	TRUE
chr14	45628259	45628737	Foxp3 2599	WT_specific	Gm17173	-2162	FALSE
chr1	108508357	108509317	Foxp3 26	shared	D630008O14Rik	-70797	TRUE
chr4	144825381	144826808	Foxp3 260	shared	Tnfrsf1b	9965	TRUE
chr14	45660922	45661886	Foxp3 2600	WT_specific	Gm17173	-35311	TRUE
chr14	45667385	45667784	Foxp3 2601	WT_specific	Gm17173	-41209	FALSE
chr14	45699402	45699695	Foxp3 2602	WT_specific	Gm17173	-73120	FALSE
chr14	48014752	48016041	Foxp3 2603	WT_specific	Lgals3	-22392	TRUE
chr14	48037510	48037844	Foxp3 2604	WT_specific	Dlgap5	238	TRUE
chr14	52511762	52512290	Foxp3 2605	WT_specific	Slc39a2	274	TRUE
chr14	52699157	52699532	Foxp3 2606	WT_specific	SNORD58	-10557	FALSE
chr14	54826016	54826349	Foxp3 2607	WT_specific	Traj12	-121	TRUE
chr14	54829489	54829977	Foxp3 2608	WT_specific	Traj8	-384	TRUE
chr14	54832151	54832813	Foxp3 2609	WT_specific	Traj6	-450	FALSE
chr4	144844303	144844629	Foxp3 261	shared	Tnfrsf1b	-7856	TRUE
chr14	54833935	54834905	Foxp3 2610	WT_specific	Traj5	-1453	FALSE
chr14	54835297	54835710	Foxp3 2611	WT_specific	Traj4	256	FALSE
chr14	54838319	54838807	Foxp3 2612	WT_specific	Traj1	-318	TRUE
chr14	54842463	54843173	Foxp3 2613	WT_specific	Trac	-2977	TRUE
chr14	54843233	54843709	Foxp3 2614	WT_specific	Trac	-3513	FALSE
chr14	54845299	54846216	Foxp3 2615	WT_specific	Trac	-6020	TRUE
chr14	54850357	54851340	Foxp3 2616	WT_specific	Trac	-11144	TRUE
chr14	54857825	54858366	Foxp3 2617	WT_specific	Dad1	15223	FALSE
chr14	54858527	54859323	Foxp3 2618	WT_specific	Dad1	14266	TRUE
chr14	55016355	55017487	Foxp3 2619	WT_specific	Slc7a7	10810	TRUE
chr4	149230253	149231158	Foxp3 262	shared	snoZ178	9584	TRUE
chr14	55017818	55018291	Foxp3 2620	WT_specific	Slc7a7	10006	TRUE
chr14	55111415	55112955	Foxp3 2621	WT_specific	Rem2	-16647	TRUE
chr14	56222453	56222765	Foxp3 2622	WT_specific	Irf9	-357	TRUE
chr14	56347170	56347563	Foxp3 2623	WT_specific	Rabggta	-6469	FALSE
chr14	56823875	56824513	Foxp3 2624	WT_specific	Gzmf	5731	TRUE
chr14	56902791	56903461	Foxp3 2625	WT_specific	Gzmb	-22364	TRUE
chr14	56906565	56906961	Foxp3 2626	WT_specific	Gzmb	-25864	TRUE
chr14	56915021	56915915	Foxp3 2627	WT_specific	Gzmb	-34818	TRUE
chr14	58438833	58439324	Foxp3 2628	WT_specific	F630043A04Rik	5676	FALSE
chr14	58528280	58528641	Foxp3 2629	WT_specific	Zdhhc20	-19542	FALSE
chr4	149913977	149914326	Foxp3 263	shared	Gm13091	28327	TRUE
chr14	61350663	61351104	Foxp3 2630	WT_specific	Spata13	639	TRUE
chr14	61355714	61356528	Foxp3 2631	WT_specific	Spata13	-4785	TRUE
chr14	62334959	62335235	Foxp3 2632	WT_specific	Dleu2	-34073	FALSE
chr14	62356372	62356998	Foxp3 2633	WT_specific	Mir1196	14177	TRUE
chr14	62966030	62966844	Foxp3 2634	WT_specific	Rnaseh2b	-708	TRUE
chr14	63417448	63417717	Foxp3 2635	WT_specific	Ints6	-37768	TRUE
chr14	63546694	63546998	Foxp3 2636	WT_specific	Defb48	56349	TRUE
chr14	63559253	63559887	Foxp3 2637	WT_specific	Defb48	43460	TRUE
chr14	65285527	65285888	Foxp3 2638	WT_specific	Kif13b	-14449	TRUE
chr14	66216945	66217215	Foxp3 2639	WT_specific	Gm600	168	TRUE
chr4	149918834	149919357	Foxp3 264	shared	Gm13091	23296	TRUE
chr14	66837575	66837874	Foxp3 2640	WT_specific	Ptk2b	-48755	TRUE
chr14	66842352	66842942	Foxp3 2641	WT_specific	Ptk2b	-53823	TRUE
chr14	66843756	66844759	Foxp3 2642	WT_specific	Ptk2b	-55640	TRUE
chr14	66848207	66848515	Foxp3 2643	WT_specific	Ptk2b	51304	FALSE
chr14	66849707	66850007	Foxp3 2644	WT_specific	Ptk2b	49812	TRUE
chr14	66868641	66869233	Foxp3 2645	WT_specific	Ptk2b	30586	TRUE
chr14	66876222	66876953	Foxp3 2646	WT_specific	Ptk2b	22866	TRUE
chr14	66877494	66878098	Foxp3 2647	WT_specific	Ptk2b	21721	TRUE
chr14	67403490	67403716	Foxp3 2648	WT_specific	Gm10032	-350	FALSE
chr14	67464915	67465125	Foxp3 2649	WT_specific	Dpysl2	22400	TRUE
chr4	150173347	150173856	Foxp3 265	shared	Gm13049	25986	TRUE
chr14	68543520	68543771	Foxp3 2650	WT_specific	Dock5	7858	FALSE
chr14	68668670	68669212	Foxp3 2651	WT_specific	Nefl	32708	TRUE
chr14	70174092	70174697	Foxp3 2652	WT_specific	Tnfrsf10b	-7418	TRUE
chr14	70174900	70175699	Foxp3 2653	WT_specific	Tnfrsf10b	-8420	TRUE
chr14	70177182	70177635	Foxp3 2654	WT_specific	Tnfrsf10b	-10356	FALSE
chr14	70179326	70179871	Foxp3 2655	WT_specific	Tnfrsf10b	-12592	FALSE
chr14	70463069	70463325	Foxp3 2656	WT_specific	Egr3	13927	FALSE
chr14	70465238	70466147	Foxp3 2657	WT_specific	Egr3	11105	TRUE
chr14	70673034	70673302	Foxp3 2658	WT_specific	Ppp3cc	15954	FALSE
chr14	70676402	70676830	Foxp3 2659	WT_specific	Ppp3cc	12426	TRUE
chr4	150298134	150299216	Foxp3 266	shared	Tnfrsf9	199	TRUE
chr14	70683585	70683939	Foxp3 2660	WT_specific	Ppp3cc	5317	TRUE
chr14	70732940	70733322	Foxp3 2661	WT_specific	Slc39a14	683	FALSE
chr14	72970401	72970699	Foxp3 2662	WT_specific	Fndc3a	-6174	FALSE
chr14	73448816	73449410	Foxp3 2663	WT_specific	Cysltr2	-489	TRUE
chr14	73487756	73488135	Foxp3 2664	WT_specific	Rcbtb2	34709	TRUE
chr14	73515777	73517186	Foxp3 2665	WT_specific	Rcbtb2	5658	TRUE
chr14	73518410	73519634	Foxp3 2666	WT_specific	Rcbtb2	3210	TRUE
chr14	73523688	73524019	Foxp3 2667	WT_specific	Rcbtb2	-1175	TRUE
chr14	73637632	73638533	Foxp3 2668	WT_specific	Lpar6	-835	TRUE
chr14	73654184	73654489	Foxp3 2669	WT_specific	Rb1	9639	FALSE
chr4	155387712	155389652	Foxp3 267	shared	Tnfrsf4	-1294	TRUE
chr14	73689888	73690105	Foxp3 2670	WT_specific	Rb1	-2591	TRUE
chr14	73734787	73735304	Foxp3 2671	WT_specific	Rb1	-9675	TRUE
chr14	73741413	73741673	Foxp3 2672	WT_specific	Rb1	-16044	FALSE
chr14	73746093	73746326	Foxp3 2673	WT_specific	Rb1	-20697	FALSE
chr14	73802964	73803465	Foxp3 2674	WT_specific	Itm2b	-18387	FALSE
chr14	75234521	75234963	Foxp3 2675	WT_specific	Lrch1	121	TRUE
chr14	75246926	75247386	Foxp3 2676	WT_specific	Lrch1	-12302	TRUE
chr14	75468352	75469000	Foxp3 2677	WT_specific	5031414D18Rik	-53166	TRUE
chr14	75497041	75497271	Foxp3 2678	WT_specific	Lrrc63	33419	FALSE
chr14	75575679	75576001	Foxp3 2679	WT_specific	Lcp1	14	FALSE
chr4	155395655	155396454	Foxp3 268	shared	U6	813	TRUE
chr14	75576257	75576530	Foxp3 2680	WT_specific	Lcp1	-515	TRUE
chr14	75578135	75579057	Foxp3 2681	WT_specific	Lcp1	-3042	TRUE
chr14	75586835	75587435	Foxp3 2682	WT_specific	Lcp1	2701	TRUE
chr14	75590094	75590786	Foxp3 2683	WT_specific	Lcp1	-650	TRUE
chr14	75591271	75591734	Foxp3 2684	WT_specific	Lcp1	-1598	FALSE
chr14	75844191	75844980	Foxp3 2685	WT_specific	Siah3	10809	TRUE
chr14	75932425	75932777	Foxp3 2686	WT_specific	Spert	59015	FALSE
chr14	76615793	76616054	Foxp3 2687	WT_specific	Rps2-ps6	21106	FALSE
chr14	76979633	76979880	Foxp3 2688	WT_specific	Serp2	-23215	TRUE
chr14	78706697	78707030	Foxp3 2689	WT_specific	Tnfsf11	666	TRUE
chr5	3501016	3501892	Foxp3 269	shared	Gm17590	-28714	TRUE
chr14	78834689	78835367	Foxp3 2690	WT_specific	Akap11	101248	TRUE
chr14	78836511	78837179	Foxp3 2691	WT_specific	Akap11	99436	TRUE
chr14	79109835	79110335	Foxp3 2692	WT_specific	Dgkh	14561	FALSE
chr14	79313881	79314336	Foxp3 2693	WT_specific	1300010F03Rik	-65245	TRUE
chr14	79715511	79715888	Foxp3 2694	WT_specific	1190002H23Rik	-14436	TRUE
chr14	79726476	79726990	Foxp3 2695	WT_specific	Naa16	16014	TRUE
chr14	79797522	79797923	Foxp3 2696	WT_specific	Mtrf1	-344	TRUE
chr14	79913391	79913753	Foxp3 2697	WT_specific	Elf1	1728	FALSE
chr14	79916876	79917464	Foxp3 2698	WT_specific	Elf1	-1971	FALSE
chr14	79918553	79918863	Foxp3 2699	WT_specific	Elf1	-3370	FALSE
chr1	108509481	108509795	Foxp3 27	shared	D630008O14Rik	-71275	TRUE
chr5	31878686	31879291	Foxp3 270	shared	Mrpl33	20017	TRUE
chr14	79918955	79919594	Foxp3 2700	WT_specific	Elf1	-4101	FALSE
chr14	79921343	79921582	Foxp3 2701	WT_specific	Elf1	-6089	FALSE
chr14	79931874	79932197	Foxp3 2702	WT_specific	Elf1	-16704	TRUE
chr14	79936001	79936362	Foxp3 2703	WT_specific	Elf1	-20869	FALSE
chr14	79937270	79937575	Foxp3 2704	WT_specific	Elf1	-22082	TRUE
chr14	103205569	103205933	Foxp3 2705	WT_specific	5S_rRNA	-617	TRUE
chr14	103432963	103433644	Foxp3 2706	WT_specific	Irg1	12550	TRUE
chr14	121712519	121712895	Foxp3 2707	WT_specific	Farp1	-58765	FALSE
chr14	121720820	121721693	Foxp3 2708	WT_specific	Stk24	56863	FALSE
chr14	121723724	121724052	Foxp3 2709	WT_specific	Stk24	54504	TRUE
chr5	34539112	34539570	Foxp3 271	shared	Mxd4	-9201	TRUE
chr14	121755923	121756546	Foxp3 2710	WT_specific	Stk24	22010	TRUE
chr14	121765836	121766155	Foxp3 2711	WT_specific	Stk24	12401	TRUE
chr14	121769880	121770326	Foxp3 2712	WT_specific	Stk24	8230	FALSE
chr14	121771193	121772582	Foxp3 2713	WT_specific	Stk24	5974	TRUE
chr14	121850127	121850443	Foxp3 2714	WT_specific	Slc15a1	54032	TRUE
chr14	122265179	122265711	Foxp3 2715	WT_specific	Ubac2	12117	FALSE
chr14	122298391	122299313	Foxp3 2716	WT_specific	Gpr18	15683	TRUE
chr14	122302760	122303467	Foxp3 2717	WT_specific	Gpr18	11529	TRUE
chr14	122305490	122305823	Foxp3 2718	WT_specific	Gpr18	9173	TRUE
chr14	122306202	122306524	Foxp3 2719	WT_specific	Gpr18	8472	TRUE
chr5	37457304	37459469	Foxp3 272	shared	Jakmip1	-17314	TRUE
chr14	122316460	122317064	Foxp3 2720	WT_specific	Gpr18	-2068	TRUE
chr14	122337440	122337743	Foxp3 2721	WT_specific	Gpr18	-22747	TRUE
chr14	122345925	122346328	Foxp3 2722	WT_specific	Gpr183	18087	TRUE
chr14	122356875	122357546	Foxp3 2723	WT_specific	Gpr183	6869	TRUE
chr14	122361181	122361645	Foxp3 2724	WT_specific	Gpr183	2770	TRUE
chr14	122362967	122363496	Foxp3 2725	WT_specific	Gpr183	919	TRUE
chr14	122399462	122400372	Foxp3 2726	WT_specific	Timm8a2	33524	TRUE
chr14	122405484	122405725	Foxp3 2727	WT_specific	Timm8a2	28171	FALSE
chr14	122451574	122452243	Foxp3 2728	WT_specific	Timm8a2	-18347	TRUE
chr14	122461350	122461997	Foxp3 2729	WT_specific	Timm8a2	-28101	TRUE
chr5	53881771	53882390	Foxp3 273	shared	Rbpj	64628	TRUE
chr14	122957161	122957468	Foxp3 2730	WT_specific	Pcca	-23901	TRUE
chr14	123251910	123252310	Foxp3 2731	WT_specific	Pcca	22847	TRUE
chr15	3220745	3221029	Foxp3 2732	WT_specific	Sepp1	-30	TRUE
chr15	5395997	5396255	Foxp3 2733	WT_specific	Ptger4	-202068	TRUE
chr15	5463108	5463529	Foxp3 2734	WT_specific	Ptger4	-269342	TRUE
chr15	6473840	6474102	Foxp3 2735	WT_specific	7SK	-23405	FALSE
chr15	6524423	6524867	Foxp3 2736	WT_specific	Fyb	5004	TRUE
chr15	6528395	6528771	Foxp3 2737	WT_specific	Fyb	1100	TRUE
chr15	6529132	6529544	Foxp3 2738	WT_specific	Fyb	327	TRUE
chr15	6529895	6530206	Foxp3 2739	WT_specific	Fyb	-314	TRUE
chr5	64878851	64879796	Foxp3 274	shared	Tbc1d1	-138612	TRUE
chr15	6562009	6562299	Foxp3 2740	WT_specific	Fyb	7295	TRUE
chr15	6574449	6575273	Foxp3 2741	WT_specific	Fyb	-5679	TRUE
chr15	6676491	6676771	Foxp3 2742	WT_specific	Rictor	-18388	TRUE
chr15	9493418	9493858	Foxp3 2743	WT_specific	Il7r	-34227	TRUE
chr15	9504604	9504978	Foxp3 2744	WT_specific	Il7r	-45347	TRUE
chr15	9678295	9678622	Foxp3 2745	WT_specific	Spef2	-90	TRUE
chr15	12140573	12140973	Foxp3 2746	WT_specific	Mtmr12	-6100	FALSE
chr15	25829824	25830556	Foxp3 2747	WT_specific	Fam134b	40086	TRUE
chr15	27541613	27541998	Foxp3 2748	WT_specific	Fam105b	18450	FALSE
chr15	27596868	27597176	Foxp3 2749	WT_specific	Fam105a	14064	FALSE
chr5	66251997	66252906	Foxp3 275	shared	Rhoh	1902	TRUE
chr15	27597551	27598573	Foxp3 2750	WT_specific	Fam105a	12667	TRUE
chr15	27598933	27599335	Foxp3 2751	WT_specific	Fam105a	11905	FALSE
chr15	27599811	27600336	Foxp3 2752	WT_specific	Fam105a	10904	TRUE
chr15	27713758	27714243	Foxp3 2753	WT_specific	Fam105a	-102981	TRUE
chr15	27856925	27857346	Foxp3 2754	WT_specific	Trio	-8320	TRUE
chr15	28119451	28119708	Foxp3 2755	WT_specific	Dnahc5	13799	TRUE
chr15	36144102	36144952	Foxp3 2756	WT_specific	U6	-9937	TRUE
chr15	36191093	36191485	Foxp3 2757	WT_specific	Rnf19a	21417	TRUE
chr15	36233313	36234405	Foxp3 2758	WT_specific	Rpl7a-ps3	4317	TRUE
chr15	36275351	36276388	Foxp3 2759	WT_specific	Rpl7a-ps3	-37666	TRUE
chr5	66279143	66280740	Foxp3 276	shared	Rhoh	-25932	TRUE
chr15	36291601	36292048	Foxp3 2760	WT_specific	Rpl7a-ps3	-53326	FALSE
chr15	36304223	36305559	Foxp3 2761	WT_specific	Rpl7a-ps3	-66837	TRUE
chr15	36325207	36325561	Foxp3 2762	WT_specific	Rpl7a-ps3	-86839	TRUE
chr15	36325930	36326271	Foxp3 2763	WT_specific	Rpl7a-ps3	-87549	TRUE
chr15	36326404	36326910	Foxp3 2764	WT_specific	Rpl7a-ps3	-88188	TRUE
chr15	36326964	36327527	Foxp3 2765	WT_specific	Rpl7a-ps3	-88805	FALSE
chr15	36508202	36508735	Foxp3 2766	WT_specific	Pabpc1	18446	TRUE
chr15	36569243	36570568	Foxp3 2767	WT_specific	Pabpc1	-31840	TRUE
chr15	36617642	36618274	Foxp3 2768	WT_specific	Pabpc1	-79546	TRUE
chr15	36645425	36645823	Foxp3 2769	WT_specific	Ywhaz	76346	TRUE
chr5	66347105	66347480	Foxp3 277	shared	Chrna9	10883	TRUE
chr15	36646160	36646593	Foxp3 2770	WT_specific	Ywhaz	75576	TRUE
chr15	36647910	36648307	Foxp3 2771	WT_specific	Ywhaz	73862	FALSE
chr15	36699395	36699719	Foxp3 2772	WT_specific	Ywhaz	22450	TRUE
chr15	36711587	36711928	Foxp3 2773	WT_specific	Ywhaz	10241	TRUE
chr15	41663661	41664121	Foxp3 2774	WT_specific	Oxr1	-1617	TRUE
chr15	50485080	50485393	Foxp3 2775	WT_specific	Trps1	173674	TRUE
chr15	50529688	50530025	Foxp3 2776	WT_specific	Trps1	129042	TRUE
chr15	50530176	50530419	Foxp3 2777	WT_specific	Trps1	128648	TRUE
chr15	55661835	55662189	Foxp3 2778	WT_specific	Sntb1	75676	FALSE
chr15	55676021	55676613	Foxp3 2779	WT_specific	Sntb1	61252	TRUE
chr5	73027174	73027626	Foxp3 278	shared	Cnga1	1455	TRUE
chr15	55677974	55678290	Foxp3 2780	WT_specific	Sntb1	59575	FALSE
chr15	55679011	55679521	Foxp3 2781	WT_specific	Sntb1	58344	TRUE
chr15	55721847	55722172	Foxp3 2782	WT_specific	Sntb1	15693	FALSE
chr15	57603709	57604488	Foxp3 2783	WT_specific	9330154K18Rik	-35111	TRUE
chr15	57709793	57710226	Foxp3 2784	WT_specific	Derl1	13747	TRUE
chr15	57986250	57986512	Foxp3 2785	WT_specific	SNORA11	-8341	FALSE
chr15	58516725	58517628	Foxp3 2786	WT_specific	Fer1l6	-37568	TRUE
chr15	58562127	58562347	Foxp3 2787	WT_specific	RP23-102L5.1	51159	FALSE
chr15	58758403	58758736	Foxp3 2788	WT_specific	Tatdn1	6546	FALSE
chr15	59343231	59343610	Foxp3 2789	WT_specific	Trib1	136295	TRUE
chr5	93581081	93581738	Foxp3 279	shared	Sept11	-14118	TRUE
chr15	59352095	59352391	Foxp3 2790	WT_specific	Trib1	127514	TRUE
chr15	59353192	59353774	Foxp3 2791	WT_specific	Trib1	126131	FALSE
chr15	59355473	59355896	Foxp3 2792	WT_specific	Trib1	124009	TRUE
chr15	59356789	59357756	Foxp3 2793	WT_specific	Trib1	122149	TRUE
chr15	59368352	59368904	Foxp3 2794	WT_specific	Trib1	111001	FALSE
chr15	59386056	59386474	Foxp3 2795	WT_specific	Trib1	93431	TRUE
chr15	59423738	59424264	Foxp3 2796	WT_specific	Trib1	55641	TRUE
chr15	59427637	59428429	Foxp3 2797	WT_specific	Trib1	51476	TRUE
[truncated: 4,308 more rows]

## Sheet: Foxp3 peaks by gene
id	chr	start	end	status	gene_name	dist	in.ocr
Foxp3 5344	chr7	134362583	134363106	WT_specific	44440	-1094	FALSE
Foxp3 2127	chr11	117160849	117161555	WT_specific	44448	7913	TRUE
Foxp3 2129	chr11	117179915	117181194	WT_specific	44448	6553	TRUE
Foxp3 2128	chr11	117163972	117164345	WT_specific	44448	5123	FALSE
Foxp3 2131	chr11	117186229	117186959	WT_specific	44448	788	TRUE
Foxp3 2130	chr11	117185589	117186068	WT_specific	44448	1679	FALSE
Foxp3 2132	chr11	117187138	117187940	WT_specific	44448	-193	TRUE
Foxp3 670	chr11	117188118	117188858	shared	44448	-1111	TRUE
Foxp3 2133	chr11	117194650	117196057	WT_specific	44448	-2315	TRUE
Foxp3 4691	chr5	93564594	93564951	WT_specific	44450	2669	TRUE
Foxp3 279	chr5	93581081	93581738	shared	44450	-14118	TRUE
Foxp3 6226	chr6	108648960	108649148	IKcKO_specific	0610040F04Rik	-38220	FALSE
Foxp3 4414	chr4	101023046	101023637	WT_specific	0610043K17Rik	2751	FALSE
Foxp3 6074	chr18	11332887	11333142	IKcKO_specific	1010001N08Rik	-280577	FALSE
Foxp3 546	chr10	66326831	66328268	shared	1110002J07Rik	54738	TRUE
Foxp3 5913	chr10	66383098	66383519	IKcKO_specific	1110002J07Rik	-513	TRUE
Foxp3 1904	chr11	79959287	79959748	WT_specific	1110002N22Rik	-4071	FALSE
Foxp3 6306	chrX	67638924	67639170	IKcKO_specific	1110012L19Rik	-118	TRUE
Foxp3 3874	chr2	132514394	132515605	WT_specific	1110034G24Rik	288	TRUE
Foxp3 3809	chr2	91284552	91285015	WT_specific	1110051M20Rik	-154	TRUE
Foxp3 2694	chr14	79715511	79715888	WT_specific	1190002H23Rik	-14436	TRUE
Foxp3 2693	chr14	79313881	79314336	WT_specific	1300010F03Rik	-65245	TRUE
Foxp3 3973	chr2	172908992	172909983	WT_specific	1300015D01Rik	26336	TRUE
Foxp3 3974	chr2	172915000	172915369	WT_specific	1300015D01Rik	20950	TRUE
Foxp3 1856	chr11	68829067	68829945	WT_specific	1500010J02Rik	-309	TRUE
Foxp3 854	chr16	96081579	96082913	shared	1600002D24Rik	37407	TRUE
Foxp3 3119	chr16	96091359	96091753	WT_specific	1600002D24Rik	28567	TRUE
Foxp3 3120	chr16	96151553	96152155	WT_specific	1600002D24Rik	-1471	TRUE
Foxp3 1329	chr1	195033964	195034721	WT_specific	1600010F14Rik	-777	TRUE
Foxp3 2997	chr16	33370953	33371250	WT_specific	1700007L15Rik	9563	TRUE
Foxp3 1261	chr1	173044051	173044457	WT_specific	1700009P17Rik	-337	TRUE
Foxp3 3780	chr2	72833588	72834363	WT_specific	1700011J10Rik	-9065	TRUE
Foxp3 1875	chr11	75789570	75791303	WT_specific	1700016K19Rik	22111	TRUE
Foxp3 1876	chr11	75791569	75792003	WT_specific	1700016K19Rik	21411	TRUE
Foxp3 1078	chr1	88312146	88312889	WT_specific	1700019O17Rik	10057	TRUE
Foxp3 1079	chr1	88313100	88313422	WT_specific	1700019O17Rik	9524	TRUE
Foxp3 1080	chr1	88337939	88338324	WT_specific	1700019O17Rik	-15378	TRUE
Foxp3 3832	chr2	119427383	119427626	WT_specific	1700020I14Rik	-7587	FALSE
Foxp3 6142	chr2	173295129	173295615	IKcKO_specific	1700021F07Rik	52472	TRUE
Foxp3 4342	chr4	42977920	42978161	WT_specific	1700022I11Rik	4657	TRUE
Foxp3 2101	chr11	109714026	109714267	WT_specific	1700023C21Rik	-7075	FALSE
Foxp3 2102	chr11	109720799	109721431	WT_specific	1700023C21Rik	-14239	TRUE
Foxp3 2103	chr11	109721533	109722274	WT_specific	1700023C21Rik	-15082	TRUE
Foxp3 5996	chr13	99726796	99726979	IKcKO_specific	1700024P04Rik	27541	FALSE
Foxp3 1198	chr1	153866431	153866693	WT_specific	1700025G04Rik	-12796	TRUE
Foxp3 1199	chr1	153931844	153932475	WT_specific	1700025G04Rik	4975	TRUE
Foxp3 1517	chr10	82591636	82591870	WT_specific	1700025N21Rik	12913	FALSE
Foxp3 186	chr3	105804448	105805036	shared	1700027A23Rik	-621	TRUE
Foxp3 2489	chr13	97753575	97754041	WT_specific	1700029F12Rik	50276	TRUE
Foxp3 1488	chr10	67908288	67908562	WT_specific	1700040L02Rik	79953	TRUE
Foxp3 5917	chr10	68004325	68004597	IKcKO_specific	1700040L02Rik	47	TRUE
Foxp3 5170	chr7	28718103	28718450	WT_specific	1700049G17Rik	-3971	TRUE
Foxp3 1217	chr1	158978671	158978973	WT_specific	1700057K13Rik	59546	TRUE
Foxp3 3629	chr2	9076918	9077194	WT_specific	1700061F12Rik	33948	TRUE
Foxp3 631	chr11	69085216	69086446	shared	1700067G03Rik	21207	TRUE
Foxp3 2040	chr11	104222027	104222354	WT_specific	1700081L11Rik	-19741	FALSE
Foxp3 243	chr4	128709442	128710489	shared	1700086P04Rik	24738	TRUE
Foxp3 244	chr4	128710604	128711132	shared	1700086P04Rik	24095	TRUE
Foxp3 4451	chr4	128711185	128711603	WT_specific	1700086P04Rik	23624	TRUE
Foxp3 4452	chr4	128712133	128713073	WT_specific	1700086P04Rik	22154	TRUE
Foxp3 3669	chr2	28904994	28905354	WT_specific	1700101E01Rik	5225	FALSE
Foxp3 2193	chr12	36942927	36943338	WT_specific	1700108M19Rik	1451	TRUE
Foxp3 5911	chr10	62708945	62709232	IKcKO_specific	1700120B22Rik	-2336	FALSE
Foxp3 162	chr3	27052868	27053147	shared	1700125G22Rik	-199	TRUE
Foxp3 1499	chr10	76985002	76985565	WT_specific	1810008A18Rik	-7007	TRUE
Foxp3 2936	chr15	100536507	100536892	WT_specific	1810009N23Rik	-10681	TRUE
Foxp3 5155	chr7	13534929	13535899	WT_specific	1810019N24Rik	11218	TRUE
Foxp3 370	chr6	145255226	145256098	shared	2010013B24Rik	-4426	TRUE
Foxp3 4197	chr3	106286495	106287301	WT_specific	2010016I18Rik	-946	TRUE
Foxp3 6006	chr14	31935895	31936137	IKcKO_specific	2010107H07Rik	5979	FALSE
Foxp3 280	chr5	93635455	93635917	shared	2010109A12Rik	-373	TRUE
Foxp3 2458	chr13	63324305	63324811	WT_specific	2010111I01Rik	49766	TRUE
Foxp3 2459	chr13	63347979	63348271	WT_specific	2010111I01Rik	26306	FALSE
Foxp3 5990	chr13	63347320	63347884	IKcKO_specific	2010111I01Rik	26693	TRUE
Foxp3 2461	chr13	63349594	63349875	WT_specific	2010111I01Rik	24702	FALSE
Foxp3 2460	chr13	63348982	63349281	WT_specific	2010111I01Rik	25296	TRUE
Foxp3 2462	chr13	63350343	63350991	WT_specific	2010111I01Rik	23586	TRUE
Foxp3 2463	chr13	63351089	63351582	WT_specific	2010111I01Rik	22995	TRUE
Foxp3 4869	chr6	31236051	31236478	WT_specific	2210408F21Rik	-1474	TRUE
Foxp3 4870	chr6	31236883	31237480	WT_specific	2210408F21Rik	-2476	TRUE
Foxp3 4826	chr5	149490920	149491526	WT_specific	2210417A02Rik	61890	TRUE
Foxp3 4827	chr5	149551997	149552309	WT_specific	2210417A02Rik	1107	FALSE
Foxp3 6205	chr5	149550601	149551026	IKcKO_specific	2210417A02Rik	2390	TRUE
Foxp3 5087	chr6	129170245	129170523	WT_specific	2310001H17Rik	13469	TRUE
Foxp3 364	chr6	129185524	129186851	shared	2310001H17Rik	1115	TRUE
Foxp3 365	chr6	129187601	129188234	shared	2310001H17Rik	-234	TRUE
Foxp3 5088	chr6	129180682	129181306	WT_specific	2310001H17Rik	2686	FALSE
Foxp3 5089	chr6	129183566	129183982	WT_specific	2310001H17Rik	10	FALSE
Foxp3 5090	chr6	129184823	129185400	WT_specific	2310001H17Rik	-1408	FALSE
Foxp3 3836	chr2	121282844	121283195	WT_specific	2310003F16Rik	-325	TRUE
Foxp3 5863	chr1	60835321	60835752	IKcKO_specific	2310016D23Rik	-65	TRUE
Foxp3 3383	chr18	33115188	33115584	WT_specific	2310026I22Rik	-16708	TRUE
Foxp3 891	chr18	33129280	33130306	shared	2310026I22Rik	-31430	TRUE
Foxp3 4301	chr4	11011715	11012413	WT_specific	2310030N02Rik	-9061	TRUE
Foxp3 4302	chr4	11015505	11016622	WT_specific	2310030N02Rik	-13270	TRUE
Foxp3 206	chr4	11016736	11017933	shared	2310030N02Rik	-14581	TRUE
Foxp3 5261	chr7	90807386	90808542	WT_specific	2310044K18Rik	-457	TRUE
Foxp3 5262	chr7	90812805	90813098	WT_specific	2310044K18Rik	-5013	FALSE
Foxp3 5737	chr9	72937006	72937445	WT_specific	2410004A20Rik	12198	TRUE
Foxp3 4275	chr3	145613103	145613707	WT_specific	2410004B18Rik	-12099	TRUE
Foxp3 4791	chr5	130371404	130371854	WT_specific	2410018M08Rik	-206	TRUE
Foxp3 4928	chr6	54655469	54656024	WT_specific	2410066E13Rik	-24258	TRUE
Foxp3 4929	chr6	54656743	54657499	WT_specific	2410066E13Rik	-25733	FALSE
Foxp3 4930	chr6	54688374	54688708	WT_specific	2410066E13Rik	-56942	FALSE
Foxp3 3891	chr2	153162021	153162363	WT_specific	2500004C02Rik	6594	TRUE
Foxp3 3892	chr2	153162668	153163284	WT_specific	2500004C02Rik	5673	FALSE
Foxp3 2965	chr16	21728164	21728430	WT_specific	2510009E07Rik	-33692	TRUE
Foxp3 5028	chr6	115544565	115545073	WT_specific	2510049J12Rik	-2479	TRUE
Foxp3 5377	chr8	13986876	13987441	WT_specific	2610019F03Rik	-12409	TRUE
Foxp3 402	chr7	126978835	126979650	shared	2610020H08Rik	-1779	TRUE
Foxp3 5318	chr7	126980420	126980655	WT_specific	2610020H08Rik	-2784	FALSE
Foxp3 1692	chr11	21007006	21007423	WT_specific	2610024D14Rik	-7886	TRUE
Foxp3 1693	chr11	21012163	21012449	WT_specific	2610024D14Rik	-12912	FALSE
Foxp3 2104	chr11	113033694	113034348	WT_specific	2610035D17Rik	43	TRUE
Foxp3 2499	chr13	105367463	105368298	WT_specific	2610204G07Rik	106713	TRUE
Foxp3 2500	chr13	105396864	105397205	WT_specific	2610204G07Rik	77806	TRUE
Foxp3 749	chr13	105411345	105411930	shared	2610204G07Rik	63081	TRUE
Foxp3 750	chr13	105413184	105413818	shared	2610204G07Rik	61193	TRUE
Foxp3 2501	chr13	105408065	105408442	WT_specific	2610204G07Rik	66569	FALSE
Foxp3 2502	chr13	105415650	105416192	WT_specific	2610204G07Rik	58819	FALSE
Foxp3 2384	chr13	28644935	28645350	WT_specific	2610307P16Rik	-32373	FALSE
Foxp3 2298	chr12	88795684	88796082	WT_specific	2700073G19Rik	-11115	FALSE
Foxp3 2348	chr12	112797928	112798822	WT_specific	2810029C07Rik	13791	TRUE
Foxp3 3115	chr16	96019854	96020706	WT_specific	2810404F17Rik	9218	TRUE
Foxp3 3116	chr16	96030578	96030931	WT_specific	2810404F17Rik	-1007	TRUE
Foxp3 3117	chr16	96041656	96042178	WT_specific	2810404F17Rik	-12254	TRUE
Foxp3 3118	chr16	96048819	96049249	WT_specific	2810404F17Rik	-19325	TRUE
Foxp3 3895	chr2	156219965	156220197	WT_specific	2900097C17Rik	-1632	FALSE
Foxp3 3454	chr18	82991723	82992325	WT_specific	3010027C24Rik	32961	TRUE
Foxp3 2301	chr12	100560365	100560665	WT_specific	3300002A11Rik	18699	TRUE
Foxp3 543	chr10	59813881	59815336	shared	4632428N05Rik	-3265	TRUE
Foxp3 2322	chr12	106251332	106252229	WT_specific	4831426I19Rik	-4210	TRUE
Foxp3 921	chr19	53535107	53536459	shared	4833407H14Rik	-1338	TRUE
Foxp3 2549	chr13	120251403	120252074	WT_specific	4833420G17Rik	-508	TRUE
Foxp3 5150	chr6	149092621	149093139	WT_specific	4833442J19Rik	-2971	FALSE
Foxp3 3902	chr2	157044455	157044848	WT_specific	4922505G16Rik	4840	FALSE
Foxp3 5930	chr11	11406492	11406721	IKcKO_specific	4930415F15Rik	-17452	TRUE
Foxp3 1674	chr11	11412151	11412753	WT_specific	4930415F15Rik	-23484	TRUE
Foxp3 1847	chr11	62427559	62427810	WT_specific	4930443B20Rik	-8541	TRUE
Foxp3 3661	chr2	19197708	19198196	WT_specific	4930447M23Rik	67748	TRUE
Foxp3 3060	chr16	64757378	64757902	WT_specific	4930453N24Rik	8580	TRUE
Foxp3 3382	chr18	33040035	33040441	WT_specific	4930455D15Rik	-43500	TRUE
Foxp3 2335	chr12	108969023	108969427	WT_specific	4930465M20Rik	4271	TRUE
Foxp3 3469	chr19	5405735	5406209	WT_specific	4930481A15Rik	531	TRUE
Foxp3 904	chr19	5406725	5407249	shared	4930481A15Rik	-375	TRUE
Foxp3 3470	chr19	5408889	5409332	WT_specific	4930481A15Rik	-2458	FALSE
Foxp3 1520	chr10	85554731	85555025	WT_specific	4930486F22Rik	3605	TRUE
Foxp3 742	chr13	60949524	60949864	shared	4930486L24Rik	15913	TRUE
Foxp3 4828	chr5	149580648	149581266	WT_specific	4930505K14Rik	8273	TRUE
Foxp3 1429	chr10	40091734	40092238	WT_specific	4930520K10Rik	-22191	TRUE
Foxp3 1430	chr10	40106189	40106461	WT_specific	4930520K10Rik	-36414	TRUE
Foxp3 1431	chr10	40132382	40132664	WT_specific	4930520K10Rik	-62617	FALSE
Foxp3 1432	chr10	40139672	40139967	WT_specific	4930520K10Rik	-69920	TRUE
Foxp3 1218	chr1	161954512	161955258	WT_specific	4930523C07Rik	19257	TRUE
Foxp3 1219	chr1	161975521	161975840	WT_specific	4930523C07Rik	-1125	FALSE
Foxp3 1220	chr1	161983361	161983822	WT_specific	4930523C07Rik	-9107	TRUE
Foxp3 1221	chr1	161984044	161984574	WT_specific	4930523C07Rik	-9859	TRUE
Foxp3 1713	chr11	31848384	31848841	WT_specific	4930524B15Rik	16751	TRUE
Foxp3 2299	chr12	92422159	92422431	WT_specific	4930534B04Rik	-219	TRUE
Foxp3 232	chr4	88510220	88510794	shared	4930553M12Rik	3489	TRUE
Foxp3 4398	chr4	88513884	88514222	WT_specific	4930553M12Rik	61	TRUE
Foxp3 1234	chr1	163906074	163906639	WT_specific	4930558K02Rik	3128	TRUE
Foxp3 1235	chr1	163921428	163921642	WT_specific	4930558K02Rik	-11875	FALSE
Foxp3 2930	chr15	98815720	98816493	WT_specific	4930578M01Rik	-97	TRUE
Foxp3 3758	chr2	69616347	69616837	WT_specific	4930578N16Rik	3208	TRUE
Foxp3 5431	chr8	84143162	84143462	WT_specific	4930579O11Rik	47509	TRUE
Foxp3 5432	chr8	84159947	84160333	WT_specific	4930579O11Rik	30638	TRUE
Foxp3 955	chr1	37530318	37530899	WT_specific	4930594C11Rik	14928	TRUE
Foxp3 956	chr1	37534938	37535524	WT_specific	4930594C11Rik	10303	TRUE
Foxp3 1188	chr1	140869710	140870063	WT_specific	4930596I21Rik	4171	FALSE
Foxp3 3520	chr19	26919703	26920155	WT_specific	4931403E22Rik	-21758	TRUE
Foxp3 2218	chr12	70944912	70945299	WT_specific	4931403G20Rik	3323	FALSE
Foxp3 3082	chr16	91055925	91057128	WT_specific	4931406G06Rik	-12227	TRUE
Foxp3 3083	chr16	91073542	91073947	WT_specific	4932438H23Rik	-4557	TRUE
Foxp3 5927	chr10	115924184	115924541	IKcKO_specific	4933400F03Rik	-13140	TRUE
Foxp3 6119	chr2	70358713	70358946	IKcKO_specific	4933404M02Rik	-11392	FALSE
Foxp3 1073	chr1	87831803	87832115	WT_specific	4933407L21Rik	-6813	TRUE
Foxp3 4330	chr4	33105433	33105920	WT_specific	4933421O10Rik	12378	TRUE
Foxp3 2276	chr12	81893848	81894148	WT_specific	4933426M11Rik	-2602	TRUE
Foxp3 1582	chr10	111014899	111015783	WT_specific	4933440J02Rik	15546	TRUE
Foxp3 778	chr14	75460574	75460927	shared	5031414D18Rik	-45093	TRUE
Foxp3 2677	chr14	75468352	75469000	WT_specific	5031414D18Rik	-53166	TRUE
Foxp3 4614	chr5	22892456	22893088	WT_specific	5031425E22Rik	46649	TRUE
Foxp3 4615	chr5	22918891	22919168	WT_specific	5031425E22Rik	20569	FALSE
Foxp3 4010	chr3	51356529	51357230	WT_specific	5031434O11Rik	6449	TRUE
Foxp3 4011	chr3	51357434	51357788	WT_specific	5031434O11Rik	5891	TRUE
Foxp3 4012	chr3	51357868	51358944	WT_specific	5031434O11Rik	4735	TRUE
Foxp3 3525	chr19	29441208	29441494	WT_specific	5033414D02Rik	304	TRUE
Foxp3 2426	chr13	46124140	46124383	WT_specific	5033430I15Rik	-63761	FALSE
Foxp3 3038	chr16	50737338	50737939	WT_specific	5330426P16Rik	-5077	TRUE
Foxp3 1585	chr10	116002356	116002647	WT_specific	5330438D12Rik	15690	TRUE
Foxp3 3224	chr17	36007138	36007470	WT_specific	5530401N12Rik	-3639	TRUE
Foxp3 6237	chr6	143014442	143015001	IKcKO_specific	5730419I09Rik	12170	TRUE
Foxp3 369	chr6	143063322	143064331	shared	5730419I09Rik	-15704	TRUE
Foxp3 6238	chr6	143023915	143024265	IKcKO_specific	5730419I09Rik	2906	FALSE
Foxp3 3121	chr17	5439774	5440745	WT_specific	5730437N04Rik	-485	TRUE
Foxp3 4288	chr3	153468984	153469699	WT_specific	5730460C07Rik	-14648	TRUE
Foxp3 3867	chr2	132034087	132034384	WT_specific	5730494N06Rik	39006	FALSE
Foxp3 3580	chr19	53495342	53496001	WT_specific	5830416P10Rik	25803	TRUE
Foxp3 3582	chr19	53498380	53499452	WT_specific	5830416P10Rik	22352	TRUE
Foxp3 3581	chr19	53496881	53497241	WT_specific	5830416P10Rik	24563	FALSE
Foxp3 3583	chr19	53507819	53508697	WT_specific	5830416P10Rik	13107	TRUE
Foxp3 3584	chr19	53508825	53509349	WT_specific	5830416P10Rik	12455	TRUE
Foxp3 3586	chr19	53517794	53518415	WT_specific	5830416P10Rik	3389	TRUE
Foxp3 3585	chr19	53514765	53515281	WT_specific	5830416P10Rik	6523	FALSE
Foxp3 922	chr19	53538767	53540280	shared	5830416P10Rik	-994	TRUE
Foxp3 6097	chr19	53513787	53514235	IKcKO_specific	5830416P10Rik	7569	FALSE
Foxp3 6098	chr19	53525040	53525220	IKcKO_specific	5830416P10Rik	-3416	FALSE
Foxp3 5817	chr9	120492028	120492364	WT_specific	5830454E08Rik	-5901	TRUE
Foxp3 4686	chr5	91017873	91018242	WT_specific	5830473C10Rik	-27998	TRUE
Foxp3 1406	chr10	26078865	26079308	WT_specific	5S_rRNA	-1555	TRUE
Foxp3 4846	chr6	30276252	30276725	WT_specific	5S_rRNA	20741	TRUE
Foxp3 3172	chr17	31203665	31204682	WT_specific	5S_rRNA	-8133	TRUE
Foxp3 3393	chr18	38540813	38541392	WT_specific	5S_rRNA	-25160	TRUE
Foxp3 4072	chr3	69459643	69460019	WT_specific	5S_rRNA	29370	TRUE
Foxp3 3328	chr17	84373095	84373902	WT_specific	5S_rRNA	-26974	TRUE
Foxp3 3329	chr17	84403302	84403893	WT_specific	5S_rRNA	-56965	TRUE
Foxp3 3330	chr17	84421751	84422010	WT_specific	5S_rRNA	-75082	TRUE
Foxp3 1538	chr10	94292058	94292703	WT_specific	5S_rRNA	-8303	TRUE
Foxp3 1539	chr10	94327313	94327714	WT_specific	5S_rRNA	-43314	TRUE
Foxp3 2705	chr14	103205569	103205933	WT_specific	5S_rRNA	-617	TRUE
Foxp3 5475	chr8	117509977	117510274	WT_specific	5S_rRNA	66539	TRUE
Foxp3 6273	chr8	117619614	117619997	IKcKO_specific	5S_rRNA	-43184	TRUE
Foxp3 5476	chr8	117712839	117713470	WT_specific	5S_rRNA	-136657	TRUE
Foxp3 5477	chr8	117713708	117714013	WT_specific	5S_rRNA	-137200	TRUE
Foxp3 5478	chr8	117751483	117751766	WT_specific	5S_rRNA	-174953	TRUE
Foxp3 5479	chr8	117757827	117758334	WT_specific	5S_rRNA	-181521	TRUE
Foxp3 5503	chr8	126152037	126152449	WT_specific	5S_rRNA	-4804	TRUE
Foxp3 5521	chr8	130113149	130113568	WT_specific	5S_rRNA	8038	TRUE
Foxp3 5969	chr12	26147488	26147841	IKcKO_specific	5S_rRNA	224825	FALSE
Foxp3 1230	chr1	163544165	163544646	WT_specific	5S_rRNA	-61849	TRUE
Foxp3 4525	chr4	136010876	136011376	WT_specific	6030445D17Rik	6789	TRUE
Foxp3 1298	chr1	182357620	182358258	WT_specific	6330403A02Rik	55340	TRUE
Foxp3 1299	chr1	182359017	182359404	WT_specific	6330403A02Rik	54194	FALSE
Foxp3 1300	chr1	182362040	182362431	WT_specific	6330403A02Rik	51167	TRUE
Foxp3 4531	chr4	140739596	140739957	WT_specific	6330545A04Rik	29914	TRUE
Foxp3 6121	chr2	72676280	72677013	IKcKO_specific	6430710C18Rik	-25239	TRUE
Foxp3 3129	chr17	12972128	12972631	WT_specific	7SK	-9134	TRUE
Foxp3 855	chr17	12975897	12976313	shared	7SK	-12816	TRUE
Foxp3 1696	chr11	21072307	21072835	WT_specific	7SK	25144	TRUE
Foxp3 599	chr11	21074009	21074788	shared	7SK	23191	TRUE
Foxp3 551	chr10	74909000	74909633	shared	7SK	-4268	TRUE
Foxp3 3316	chr17	80573317	80573812	WT_specific	7SK	21932	TRUE
Foxp3 3317	chr17	80573917	80574708	WT_specific	7SK	21036	TRUE
Foxp3 3318	chr17	80574895	80575559	WT_specific	7SK	20185	TRUE
Foxp3 3076	chr16	84583976	84584255	WT_specific	7SK	36118	TRUE
Foxp3 1494	chr10	74898549	74899136	WT_specific	7SK	6229	FALSE
Foxp3 1695	chr11	21070136	21070376	WT_specific	7SK	27603	FALSE
Foxp3 2292	chr12	88148653	88149159	WT_specific	7SK	1748	TRUE
Foxp3 698	chr12	88175163	88176220	shared	7SK	-25313	TRUE
Foxp3 2192	chr12	35706778	35707151	WT_specific	7SK	-21922	FALSE
Foxp3 5922	chr10	94581954	94582219	IKcKO_specific	7SK	-170995	TRUE
Foxp3 2293	chr12	88174047	88174499	WT_specific	7SK	-23592	FALSE
Foxp3 2735	chr15	6473840	6474102	WT_specific	7SK	-23405	FALSE
Foxp3 2978	chr16	23403033	23403300	WT_specific	7SK	20508	FALSE
Foxp3 4182	chr3	103189018	103190678	WT_specific	7SK	-7024	TRUE
Foxp3 4707	chr5	103947960	103948349	WT_specific	7SK	83257	TRUE
Foxp3 3315	chr17	80572396	80572777	WT_specific	7SK	22967	FALSE
Foxp3 2078	chr11	107726227	107726900	WT_specific	7SK	-38212	TRUE
Foxp3 4220	chr3	121073309	121073761	WT_specific	7SK	-33151	TRUE
Foxp3 441	chr8	123225406	123226571	shared	7SK	15083	TRUE
Foxp3 4180	chr3	103187629	103187872	WT_specific	7SK	-4218	FALSE
Foxp3 4181	chr3	103188455	103188711	WT_specific	7SK	-5057	FALSE
Foxp3 5485	chr8	123238965	123239309	WT_specific	7SK	2345	TRUE
Foxp3 5486	chr8	123248857	123249304	WT_specific	7SK	-7650	TRUE
Foxp3 4483	chr4	132723269	132723680	WT_specific	7SK	3949	FALSE
Foxp3 4484	chr4	132723979	132724546	WT_specific	7SK	3083	FALSE
Foxp3 5487	chr8	123249652	123250271	WT_specific	7SK	-8617	TRUE
Foxp3 4622	chr5	32138547	32138905	WT_specific	7SK	33514	FALSE
Foxp3 251	chr4	132714601	132715287	shared	7SK	12342	TRUE
Foxp3 4792	chr5	133496119	133496393	WT_specific	7SK	-218845	FALSE
Foxp3 252	chr4	132717634	132718487	shared	7SK	9142	TRUE
Foxp3 253	chr4	132725224	132726024	shared	7SK	1605	TRUE
Foxp3 4485	chr4	132726134	132726581	WT_specific	7SK	1048	TRUE
Foxp3 5119	chr6	140463300	140463711	WT_specific	7SK	15773	TRUE
Foxp3 5905	chr10	42033935	42034131	IKcKO_specific	7SK	-4550	FALSE
Foxp3 69	chr1	193016971	193018477	shared	7SK	2308	TRUE
Foxp3 5931	chr11	21073162	21073559	IKcKO_specific	7SK	24420	FALSE
Foxp3 6134	chr2	142253603	142253790	IKcKO_specific	7SK	-46066	FALSE
Foxp3 4391	chr4	63600389	63600822	WT_specific	8030451A03Rik	40066	TRUE
Foxp3 2307	chr12	102120958	102121765	WT_specific	9030617O03Rik	2325	TRUE
Foxp3 2308	chr12	102121896	102122201	WT_specific	9030617O03Rik	1889	TRUE
Foxp3 2309	chr12	102124410	102125441	WT_specific	9030617O03Rik	-1351	FALSE
Foxp3 1708	chr11	22752371	22753479	WT_specific	9130230N09Rik	5452	TRUE
Foxp3 3275	chr17	67012212	67012479	WT_specific	9130404H23Rik	-68518	FALSE
Foxp3 3955	chr2	167630973	167631534	WT_specific	9230111E07Rik	-23981	TRUE
Foxp3 2783	chr15	57603709	57604488	WT_specific	9330154K18Rik	-35111	TRUE
Foxp3 5459	chr8	96959253	96959958	WT_specific	9330175E14Rik	-953	FALSE
Foxp3 3680	chr2	30481080	30482082	WT_specific	9330198N18Rik	3093	TRUE
Foxp3 3681	chr2	30482310	30482628	WT_specific	9330198N18Rik	2547	FALSE
Foxp3 3239	chr17	44846688	44847085	WT_specific	9530072K05Rik	86	FALSE
Foxp3 3240	chr17	44850053	44850289	WT_specific	9530072K05Rik	-3118	TRUE
Foxp3 1848	chr11	63797701	63798220	WT_specific	9630013K17Rik	-20492	TRUE
Foxp3 1849	chr11	63798930	63799555	WT_specific	9630013K17Rik	-21827	TRUE
Foxp3 2093	chr11	109258476	109258894	WT_specific	9930022D16Rik	16337	FALSE
Foxp3 2094	chr11	109262742	109263038	WT_specific	9930022D16Rik	12193	FALSE
Foxp3 5188	chr7	63223548	63224080	WT_specific	A230056P14Rik	-6179	TRUE
Foxp3 1331	chr1	196843016	196843699	WT_specific	A330023F24Rik	-106	FALSE
Foxp3 4837	chr6	8435339	8436135	WT_specific	A430035B10Rik	11844	TRUE
Foxp3 1640	chr10	127941655	127942027	WT_specific	A430046D13Rik	-5607	TRUE
Foxp3 1641	chr10	127942828	127943471	WT_specific	A430046D13Rik	-7051	FALSE
Foxp3 4731	chr5	108179438	108179778	WT_specific	A430072P03Rik	-24360	FALSE
Foxp3 417	chr8	3354134	3355973	shared	A430078G23Rik	-2536	TRUE
Foxp3 3491	chr19	10814410	10815511	WT_specific	A430093F15Rik	-74	TRUE
Foxp3 3492	chr19	10815566	10816307	WT_specific	A430093F15Rik	-870	TRUE
Foxp3 908	chr19	10822125	10822879	shared	A430093F15Rik	-7442	TRUE
Foxp3 6084	chr19	10823207	10823743	IKcKO_specific	A430093F15Rik	-8306	TRUE
Foxp3 3493	chr19	10826220	10826963	WT_specific	A430093F15Rik	-11526	TRUE
Foxp3 6085	chr19	10828750	10829101	IKcKO_specific	A430093F15Rik	-13664	TRUE
Foxp3 909	chr19	10837885	10838700	shared	A430093F15Rik	-23263	TRUE
Foxp3 1942	chr11	87561351	87563909	WT_specific	A430104N18Rik	5170	TRUE
Foxp3 643	chr11	87564547	87565909	shared	A430104N18Rik	3170	TRUE
Foxp3 644	chr11	87567602	87568878	shared	A430104N18Rik	201	TRUE
Foxp3 1943	chr11	87566940	87567543	WT_specific	A430104N18Rik	1536	FALSE
Foxp3 1304	chr1	183157095	183157439	WT_specific	A430110L20Rik	-1232	TRUE
Foxp3 1305	chr1	183157706	183158628	WT_specific	A430110L20Rik	-2421	TRUE
Foxp3 1306	chr1	183158691	183159168	WT_specific	A430110L20Rik	-2961	FALSE
Foxp3 1307	chr1	183160715	183161202	WT_specific	A430110L20Rik	-4995	TRUE
Foxp3 1308	chr1	183161333	183161562	WT_specific	A430110L20Rik	-5355	TRUE
Foxp3 1309	chr1	183161997	183163031	WT_specific	A430110L20Rik	-6824	TRUE
Foxp3 4307	chr4	16097432	16097747	WT_specific	A530072M11Rik	-6490	FALSE
Foxp3 1069	chr1	87632972	87633227	WT_specific	A630001G21Rik	-91	TRUE
Foxp3 1070	chr1	87636554	87637138	WT_specific	A630001G21Rik	-3934	TRUE
Foxp3 1789	chr11	52088908	52089540	WT_specific	A630014C17Rik	17	TRUE
Foxp3 4738	chr5	110943419	110943720	WT_specific	A630023P12Rik	222	TRUE
Foxp3 2958	chr16	10843577	10844080	WT_specific	A630055G03Rik	-8928	TRUE
Foxp3 830	chr16	10844569	10845628	shared	A630055G03Rik	-10476	TRUE
Foxp3 5272	chr7	105711663	105712127	WT_specific	A630091E08Rik	-629	TRUE
Foxp3 395	chr7	105727865	105729237	shared	A630091E08Rik	-17739	TRUE
Foxp3 5273	chr7	105731421	105731969	WT_specific	A630091E08Rik	-20471	TRUE
Foxp3 5274	chr7	105736563	105736915	WT_specific	A630091E08Rik	-25417	FALSE
Foxp3 6257	chr7	105733399	105733621	IKcKO_specific	A630091E08Rik	-22123	FALSE
Foxp3 4122	chr3	94800758	94801062	WT_specific	A730011C13Rik	-144	TRUE
Foxp3 2428	chr13	48610271	48611034	WT_specific	A830005F24Rik	-2095	FALSE
Foxp3 3380	chr18	32557938	32558717	WT_specific	A830052D11Rik	-20779	TRUE
Foxp3 4200	chr3	106878767	106879075	WT_specific	A930002I21Rik	14805	TRUE
Foxp3 4201	chr3	106879256	106879548	WT_specific	A930002I21Rik	14332	TRUE
Foxp3 192	chr3	115504215	115504942	shared	A930005H10Rik	86106	TRUE
Foxp3 193	chr3	115517640	115519678	shared	A930005H10Rik	71370	TRUE
Foxp3 4213	chr3	115589409	115589837	WT_specific	A930005H10Rik	1211	FALSE
Foxp3 3086	chr16	91442674	91443830	WT_specific	A930006K02Rik	21519	TRUE
Foxp3 3087	chr16	91445541	91447117	WT_specific	A930006K02Rik	18232	TRUE
Foxp3 3088	chr16	91447208	91447694	WT_specific	A930006K02Rik	17655	TRUE
Foxp3 3089	chr16	91458403	91459019	WT_specific	A930006K02Rik	6330	TRUE
Foxp3 3090	chr16	91459339	91459657	WT_specific	A930006K02Rik	5692	FALSE
Foxp3 3091	chr16	91460031	91460646	WT_specific	A930006K02Rik	4703	FALSE
Foxp3 3092	chr16	91470581	91470871	WT_specific	A930006K02Rik	-5522	TRUE
Foxp3 915	chr19	29541336	29541930	shared	A930007I19Rik	54549	TRUE
Foxp3 3528	chr19	29542767	29543112	WT_specific	A930007I19Rik	53367	FALSE
Foxp3 3529	chr19	29575474	29575895	WT_specific	A930007I19Rik	20584	TRUE
Foxp3 6199	chr5	123439112	123439502	IKcKO_specific	A930024E05Rik	-139	TRUE
Foxp3 4944	chr6	65612037	65612505	WT_specific	A930038C07Rik	9079	TRUE
Foxp3 6217	chr6	86821629	86822166	IKcKO_specific	Aak1	-20987	TRUE
Foxp3 4864	chr6	31131925	31132543	WT_specific	AB041803	35890	FALSE
Foxp3 4865	chr6	31133207	31133646	WT_specific	AB041803	34787	FALSE
Foxp3 4866	chr6	31139616	31139925	WT_specific	AB041803	28508	FALSE
Foxp3 4867	chr6	31141420	31142276	WT_specific	AB041803	26157	TRUE
Foxp3 4868	chr6	31159849	31160536	WT_specific	AB041803	7897	TRUE
Foxp3 5952	chr11	94247533	94248060	IKcKO_specific	Abcc3	6174	TRUE
Foxp3 2220	chr12	71237015	71237539	WT_specific	Abhd12b	17590	TRUE
Foxp3 2221	chr12	71249034	71249453	WT_specific	Abhd12b	5676	TRUE
Foxp3 5972	chr12	71277626	71277885	IKcKO_specific	Abhd12b	5149	FALSE
Foxp3 1882	chr11	77331847	77332465	WT_specific	Abhd15	-345	TRUE
Foxp3 3986	chr2	181219602	181220087	WT_specific	Abhd16b	7824	FALSE
Foxp3 6106	chr2	22903885	22904193	IKcKO_specific	Abi1	-8432	TRUE
Foxp3 3596	chr19	57147500	57147897	WT_specific	Ablim1	-26169	TRUE
Foxp3 3597	chr19	57148143	57148666	WT_specific	Ablim1	-26938	TRUE
Foxp3 3599	chr19	57188456	57188771	WT_specific	Ablim1	4632	TRUE
Foxp3 3598	chr19	57159276	57159522	WT_specific	Ablim1	33881	FALSE
Foxp3 3600	chr19	57191353	57192581	WT_specific	Ablim1	822	TRUE
Foxp3 3601	chr19	57193060	57193674	WT_specific	Ablim1	-160	TRUE
Foxp3 3602	chr19	57197559	57199287	WT_specific	Ablim1	-5773	TRUE
Foxp3 925	chr19	57205934	57207041	shared	Ablim1	2126	TRUE
Foxp3 3603	chr19	57207202	57207910	WT_specific	Ablim1	1257	TRUE
Foxp3 1878	chr11	76292389	76293935	WT_specific	Abr	-11968	TRUE
Foxp3 3815	chr2	103469234	103469800	WT_specific	Abtb2	-63333	TRUE
Foxp3 6129	chr2	103472586	103472959	IKcKO_specific	Abtb2	-66492	TRUE
Foxp3 3816	chr2	103478760	103479012	WT_specific	Abtb2	-72545	TRUE
Foxp3 130	chr2	103497199	103498491	shared	Abtb2	56701	TRUE
Foxp3 3817	chr2	103522393	103522817	WT_specific	Abtb2	32375	TRUE
Foxp3 899	chr18	65574535	65575022	shared	AC102240.1	12101	TRUE
Foxp3 2166	chr12	16013386	16013855	WT_specific	AC102435.1	183302	TRUE
Foxp3 2167	chr12	16140124	16140391	WT_specific	AC102435.1	56766	TRUE
Foxp3 5311	chr7	121460646	121461383	WT_specific	AC103388.1	9454	TRUE
Foxp3 4234	chr3	130700078	130700368	WT_specific	AC114668.1	102098	TRUE
Foxp3 4235	chr3	130721591	130722085	WT_specific	AC114668.1	80381	TRUE
Foxp3 4236	chr3	130722160	130722665	WT_specific	AC114668.1	79801	TRUE
Foxp3 4237	chr3	130723543	130723890	WT_specific	AC114668.1	78576	FALSE
Foxp3 3138	chr17	24421887	24422222	WT_specific	AC117577.1	19392	FALSE
Foxp3 6280	chr9	10436523	10436739	IKcKO_specific	AC117684.1	-141583	FALSE
Foxp3 5507	chr8	129021600	129022235	WT_specific	AC118255.1	5103	TRUE
Foxp3 5168	chr7	26611889	26612275	WT_specific	AC119211.1	1471	TRUE
Foxp3 878	chr17	52301789	52302297	shared	AC121600.1	242065	TRUE
Foxp3 3264	chr17	52305220	52305700	WT_specific	AC121600.1	238662	FALSE
Foxp3 5500	chr8	125527856	125528413	WT_specific	AC121819.1	20182	FALSE
Foxp3 5501	chr8	125538391	125538648	WT_specific	AC121819.1	9947	TRUE
Foxp3 6276	chr8	125556569	125556912	IKcKO_specific	AC121819.1	-8317	TRUE
Foxp3 5872	chr1	118188763	118189184	IKcKO_specific	AC122189.1	101806	FALSE
Foxp3 3079	chr16	89907187	89907422	WT_specific	AC122218.1	-117	TRUE
Foxp3 3141	chr17	26708435	26708972	WT_specific	AC122252.1	8900	TRUE
Foxp3 3142	chr17	26731166	26731542	WT_specific	AC122252.1	-13670	TRUE
Foxp3 3143	chr17	26731667	26731982	WT_specific	AC122252.1	-14110	TRUE
Foxp3 3144	chr17	26732078	26732777	WT_specific	AC122252.1	-14905	TRUE
Foxp3 3145	chr17	26732963	26733282	WT_specific	AC122252.1	-15410	FALSE
Foxp3 6262	chr7	134309547	134309929	IKcKO_specific	AC122537.1	24612	TRUE
Foxp3 5343	chr7	134323858	134324925	WT_specific	AC122537.1	9616	TRUE
Foxp3 408	chr7	134331581	134332952	shared	AC122537.1	1589	TRUE
Foxp3 3557	chr19	44357092	44357640	WT_specific	AC123853.1	2140	TRUE
Foxp3 1177	chr1	138595377	138595835	WT_specific	AC125186.1	-1884	TRUE
Foxp3 1455	chr10	62005754	62007192	WT_specific	AC126428.1	13748	TRUE
Foxp3 1456	chr10	62016406	62017111	WT_specific	AC126428.1	3829	TRUE
Foxp3 2433	chr13	51858464	51859076	WT_specific	AC126547.1	1587	TRUE
Foxp3 737	chr13	51862527	51864350	shared	AC126547.1	-3687	TRUE
Foxp3 6013	chr14	78756136	78756559	IKcKO_specific	AC126690.2	-45412	TRUE
Foxp3 5128	chr6	143088430	143088659	WT_specific	AC127354.1	1725	FALSE
Foxp3 3357	chr17	87547481	87547853	WT_specific	AC129309.1	35712	FALSE
Foxp3 559	chr10	95643229	95644783	shared	AC131596.1	-17818	TRUE
Foxp3 1544	chr10	95663980	95664493	WT_specific	AC131596.1	-37528	TRUE
Foxp3 1546	chr10	95727505	95727825	WT_specific	AC131596.1	-100860	TRUE
Foxp3 1548	chr10	95787735	95788197	WT_specific	AC131596.1	-161232	TRUE
Foxp3 1545	chr10	95706738	95707084	WT_specific	AC131596.1	-80119	FALSE
Foxp3 560	chr10	95833244	95834685	shared	AC131596.1	-207720	TRUE
Foxp3 1547	chr10	95775478	95775821	WT_specific	AC131596.1	-148856	FALSE
Foxp3 561	chr10	95835775	95838010	shared	AC131596.1	-211045	TRUE
Foxp3 1549	chr10	95823760	95823996	WT_specific	AC131596.1	-197031	FALSE
Foxp3 1550	chr10	95838149	95838719	WT_specific	AC131596.1	-211754	FALSE
Foxp3 5924	chr10	95692118	95692320	IKcKO_specific	AC131596.1	-65355	FALSE
Foxp3 1138	chr1	129241385	129242283	WT_specific	AC131793.1	-13894	TRUE
Foxp3 3488	chr19	10012493	10013850	WT_specific	AC132253.2	-31202	TRUE
Foxp3 6083	chr19	9994058	9994394	IKcKO_specific	AC132253.2	-11746	FALSE
Foxp3 4097	chr3	89103299	89103892	WT_specific	AC132327.1	2512	TRUE
Foxp3 2261	chr12	78160921	78161418	WT_specific	AC133174.1	56001	TRUE
Foxp3 2262	chr12	78185113	78185435	WT_specific	AC133174.1	31984	FALSE
Foxp3 2263	chr12	78231334	78231847	WT_specific	AC133174.1	-14428	TRUE
Foxp3 2810	chr15	62289743	62290117	WT_specific	AC134453.1	194442	TRUE
Foxp3 505	chr9	107937186	107938129	shared	AC137678.1	-2952	TRUE
Foxp3 5777	chr9	107938442	107938920	WT_specific	AC137678.1	-3743	FALSE
Foxp3 19	chr1	82827291	82829220	shared	AC138214.1	6801	TRUE
Foxp3 1064	chr1	82829346	82829926	WT_specific	AC138214.1	6095	TRUE
Foxp3 1065	chr1	82830134	82830433	WT_specific	AC138214.1	5588	TRUE
Foxp3 1066	chr1	82831013	82831464	WT_specific	AC138214.1	4557	TRUE
Foxp3 6025	chr15	12502439	12502744	IKcKO_specific	AC150660.1	-459	FALSE
Foxp3 1005	chr1	54802014	54802298	WT_specific	AC151572.1	23764	FALSE
Foxp3 1006	chr1	54883605	54883958	WT_specific	AC151572.1	-57896	FALSE
Foxp3 1007	chr1	54897959	54898363	WT_specific	AC151572.1	-72301	FALSE
Foxp3 1008	chr1	54898508	54898996	WT_specific	AC151572.1	-72934	TRUE
Foxp3 5463	chr8	108334218	108334653	WT_specific	AC152826.1	5844	TRUE
Foxp3 5464	chr8	108334900	108335277	WT_specific	AC152826.1	5220	TRUE
Foxp3 5014	chr6	99424000	99424278	WT_specific	AC152987.1	10418	FALSE
Foxp3 1392	chr10	20916425	20916799	WT_specific	AC153556.1	28897	TRUE
Foxp3 1393	chr10	20920485	20920964	WT_specific	AC153556.1	24732	TRUE
Foxp3 1394	chr10	20942452	20942923	WT_specific	AC153556.1	2773	TRUE
Foxp3 1395	chr10	20944628	20945298	WT_specific	AC153556.1	398	TRUE
Foxp3 685	chr12	70575750	70576725	shared	AC153658.1	85599	TRUE
Foxp3 2211	chr12	70571885	70572232	WT_specific	AC153658.1	90092	FALSE
Foxp3 2212	chr12	70602664	70603309	WT_specific	AC153658.1	59015	TRUE
Foxp3 2213	chr12	70616189	70617164	WT_specific	AC153658.1	45160	FALSE
Foxp3 2214	chr12	70617278	70618031	WT_specific	AC153658.1	44293	TRUE
Foxp3 2215	chr12	70638185	70640364	WT_specific	AC153658.1	21960	TRUE
Foxp3 2216	chr12	70641016	70641352	WT_specific	AC153658.1	20972	FALSE
Foxp3 2581	chr14	28189392	28189796	WT_specific	AC154327.1	4240	TRUE
Foxp3 2582	chr14	28197436	28197805	WT_specific	AC154327.1	-3769	TRUE
Foxp3 2583	chr14	28198965	28199434	WT_specific	AC154327.1	-5398	FALSE
Foxp3 2584	chr14	28207071	28207356	WT_specific	AC154327.1	-13320	FALSE
Foxp3 2585	chr14	28215689	28216353	WT_specific	AC154327.1	-22317	TRUE
Foxp3 5910	chr10	59707419	59707627	IKcKO_specific	AC155640.2	-3170	FALSE
Foxp3 4972	chr6	86519372	86519946	WT_specific	AC158662.1	4209	TRUE
Foxp3 4973	chr6	86543177	86543625	WT_specific	AC158662.1	-19470	TRUE
Foxp3 4974	chr6	86543825	86544280	WT_specific	AC158662.1	-20125	TRUE
Foxp3 5229	chr7	82883933	82884519	WT_specific	AC158749.1	17735	TRUE
Foxp3 5231	chr7	82932507	82933446	WT_specific	AC158749.1	-31192	TRUE
Foxp3 388	chr7	82939910	82940439	shared	AC158749.1	-38185	TRUE
Foxp3 5230	chr7	82920621	82921417	WT_specific	AC158749.1	-19163	FALSE
Foxp3 389	chr7	82941168	82941734	shared	AC158749.1	-39480	TRUE
Foxp3 5232	chr7	82942452	82943003	WT_specific	AC158749.1	-40749	FALSE
Foxp3 5233	chr7	82943066	82943483	WT_specific	AC158749.1	-41229	FALSE
Foxp3 5234	chr7	82944806	82945448	WT_specific	AC158749.1	-43194	TRUE
Foxp3 5235	chr7	82945794	82946556	WT_specific	AC158749.1	-44302	TRUE
Foxp3 5236	chr7	82947407	82947771	WT_specific	AC158749.1	-45517	FALSE
Foxp3 5697	chr9	64069357	64069551	WT_specific	AC160118.1	3779	FALSE
Foxp3 5658	chr9	48346795	48347300	WT_specific	AC160992.1	-32135	TRUE
Foxp3 1071	chr1	87645438	87649530	WT_specific	AC161342.1	10839	TRUE
Foxp3 5240	chr7	87285849	87286258	WT_specific	AC164075.1	11507	TRUE
Foxp3 2506	chr13	108628359	108628677	WT_specific	AC165250.1	-9208	TRUE
Foxp3 2507	chr13	108633136	108633447	WT_specific	AC165250.1	-13978	FALSE
Foxp3 2985	chr16	31191982	31192706	WT_specific	Acap2	8371	TRUE
Foxp3 230	chr4	86531396	86532486	shared	Acer2	-12168	TRUE
Foxp3 4419	chr4	106467069	106467637	WT_specific	Acot11	4758	TRUE
Foxp3 4420	chr4	106467829	106468425	WT_specific	Acot11	3970	TRUE
Foxp3 4578	chr4	151569157	151569674	WT_specific	Acot7	4245	FALSE
Foxp3 4579	chr4	151571608	151572000	WT_specific	Acot7	1919	TRUE
Foxp3 3845	chr2	127742602	127742927	WT_specific	Acoxl	-8133	TRUE
Foxp3 3846	chr2	127753174	127753677	WT_specific	Acoxl	-18883	TRUE
Foxp3 3808	chr2	91042626	91043413	WT_specific	Acp2	-328	TRUE
Foxp3 5665	chr9	54490095	54490466	WT_specific	Acsbg1	499	TRUE
Foxp3 4810	chr5	143692695	143693344	WT_specific	Actb	-24911	TRUE
Foxp3 4811	chr5	143693811	143694255	WT_specific	Actb	-25822	TRUE
Foxp3 951	chr1	36779794	36780722	WT_specific	Actr1b	-9455	TRUE
Foxp3 28	chr1	127363463	127363835	shared	Actr3	-31768	TRUE
Foxp3 1129	chr1	127364083	127364556	WT_specific	Actr3	-32489	TRUE
Foxp3 553	chr10	89194626	89195352	shared	Actr6	-312	TRUE
Foxp3 1742	chr11	45878699	45878988	WT_specific	Adam19	-9401	FALSE
Foxp3 1743	chr11	45887420	45887935	WT_specific	Adam19	-18348	TRUE
Foxp3 1744	chr11	45889751	45890064	WT_specific	Adam19	-20477	TRUE
Foxp3 1745	chr11	45897625	45898335	WT_specific	Adam19	-28748	TRUE
Foxp3 1746	chr11	45900078	45900771	WT_specific	Adam19	-31184	TRUE
Foxp3 1747	chr11	45904476	45904929	WT_specific	Adam19	-35342	TRUE
Foxp3 748	chr13	105076789	105077480	shared	Adamts6	473	TRUE
Foxp3 2498	chr13	105082451	105082709	WT_specific	Adamts6	-4756	FALSE
Foxp3 177	chr3	95471533	95472930	shared	Adamtsl4	8144	TRUE
Foxp3 178	chr3	95473149	95473960	shared	Adamtsl4	7114	TRUE
Foxp3 179	chr3	95476023	95478157	shared	Adamtsl4	2917	TRUE
Foxp3 4136	chr3	95478748	95479799	WT_specific	Adamtsl4	1275	TRUE
Foxp3 4804	chr5	139779869	139780457	WT_specific	Adap1	-1436	TRUE
Foxp3 4101	chr3	89534704	89535079	WT_specific	Adar	-409	TRUE
Foxp3 6215	chr6	86076990	86077208	IKcKO_specific	Add2	-49130	TRUE
Foxp3 4263	chr3	138081444	138081684	WT_specific	Adh4	-3225	FALSE
Foxp3 4264	chr3	138086931	138087288	WT_specific	Adh4	-8829	TRUE
Foxp3 5033	chr6	119352721	119353029	WT_specific	Adipor2	-14325	FALSE
Foxp3 902	chr18	80366243	80366845	shared	Adnp2	-18624	TRUE
Foxp3 550	chr10	74763031	74763659	shared	Adora2a	16029	TRUE
Foxp3 4194	chr3	105694982	105695819	WT_specific	Adora3	11522	TRUE
Foxp3 4195	chr3	105713348	105714113	WT_specific	Adora3	-6772	TRUE
Foxp3 3465	chr19	4299900	4301044	WT_specific	Adrbk1	4164	TRUE
Foxp3 368	chr6	140562181	140563605	shared	Aebp2	7365	TRUE
Foxp3 284	chr5	104189415	104190065	shared	Aff1	-6473	TRUE
Foxp3 957	chr1	38714370	38715346	WT_specific	Aff3	6454	TRUE
Foxp3 958	chr1	38720510	38720957	WT_specific	Aff3	843	FALSE
Foxp3 959	chr1	38721154	38722050	WT_specific	Aff3	-250	TRUE
Foxp3 1067	chr1	82843563	82843790	WT_specific	Agfg1	-7732	FALSE
Foxp3 4219	chr3	116538720	116539560	WT_specific	Agl	-28476	TRUE
Foxp3 1507	chr10	77761102	77762369	WT_specific	Agpat3	-1426	TRUE
Foxp3 304	chr6	29803096	29804420	shared	Ahcyl2	-529	TRUE
Foxp3 1388	chr10	20626908	20627172	WT_specific	Ahi1	45219	TRUE
Foxp3 5902	chr10	20625621	20625853	IKcKO_specific	Ahi1	46538	FALSE
Foxp3 907	chr19	9071687	9072807	shared	Ahnak	1343	TRUE
Foxp3 3483	chr19	9056879	9057211	WT_specific	Ahnak	6539	FALSE
Foxp3 3484	chr19	9073165	9073705	WT_specific	Ahnak	445	TRUE
Foxp3 3485	chr19	9123558	9123942	WT_specific	Ahnak	-33660	FALSE
Foxp3 5338	chr7	134233015	134233289	WT_specific	AI467606	1661	TRUE
Foxp3 2984	chr16	31040181	31040488	WT_specific	AI480653	21025	TRUE
Foxp3 1920	chr11	83036979	83037764	WT_specific	AI662270	-113	TRUE
Foxp3 1921	chr11	83038093	83038916	WT_specific	AI662270	-1265	TRUE
Foxp3 3862	chr2	129005730	129006003	WT_specific	AI847159	365	TRUE
Foxp3 378	chr7	48648366	48648765	shared	AI987944	-135	TRUE
Foxp3 3207	chr17	35309747	35310361	WT_specific	Aif1	-138	TRUE
Foxp3 1356	chr10	13552655	13553325	WT_specific	Aig1	10767	TRUE
Foxp3 1443	chr10	43716869	43717596	WT_specific	Aim1	364	TRUE
Foxp3 1444	chr10	43788861	43789378	WT_specific	Aim1	-64726	TRUE
Foxp3 1280	chr1	175367096	175367614	WT_specific	Aim2	15341	TRUE
Foxp3 5894	chr1	175371377	175371770	IKcKO_specific	Aim2	11185	TRUE
Foxp3 3462	chr19	4120092	4120918	WT_specific	Aip	657	TRUE
Foxp3 4450	chr4	128658447	128659351	WT_specific	Ak2	9851	TRUE
Foxp3 6174	chr4	128686033	128686238	IKcKO_specific	Ak2	-15641	TRUE
Foxp3 784	chr14	78831677	78832867	shared	Akap11	103748	TRUE
Foxp3 2690	chr14	78834689	78835367	WT_specific	Akap11	101248	TRUE
Foxp3 785	chr14	78835402	78835996	shared	Akap11	100619	TRUE
Foxp3 2691	chr14	78836511	78837179	WT_specific	Akap11	99436	TRUE
Foxp3 5218	chr7	82532985	82533630	WT_specific	Akap13	66790	TRUE
Foxp3 5219	chr7	82542179	82542672	WT_specific	Akap13	57748	TRUE
Foxp3 5220	chr7	82543983	82544213	WT_specific	Akap13	56207	TRUE
Foxp3 5221	chr7	82716423	82717259	WT_specific	Akap13	37666	TRUE
Foxp3 5222	chr7	82730943	82731462	WT_specific	Akap13	23463	TRUE
Foxp3 385	chr7	82754064	82755155	shared	Akap13	-86	TRUE
Foxp3 5225	chr7	82755289	82756416	WT_specific	Akap13	-427	TRUE
Foxp3 386	chr7	82756831	82757463	shared	Akap13	-293	TRUE
Foxp3 5223	chr7	82732145	82732481	WT_specific	Akap13	22444	FALSE
Foxp3 5224	chr7	82753440	82753998	WT_specific	Akap13	927	FALSE
Foxp3 5226	chr7	82787274	82787614	WT_specific	Akap13	591	TRUE
Foxp3 387	chr7	82846755	82847255	shared	Akap13	-291	TRUE
Foxp3 5227	chr7	82799973	82800326	WT_specific	Akap13	-11255	FALSE
Foxp3 6247	chr7	82743465	82743860	IKcKO_specific	Akap13	11065	FALSE
Foxp3 6248	chr7	82787805	82788104	IKcKO_specific	Akap13	101	FALSE
Foxp3 4368	chr4	57743554	57743993	WT_specific	Akap2	10974	TRUE
Foxp3 3190	chr17	32485799	32486480	WT_specific	Akap8l	1046	TRUE
Foxp3 4382	chr4	63061875	63062315	WT_specific	Akna	2073	TRUE
Foxp3 4383	chr4	63063086	63063816	WT_specific	Akna	572	FALSE
Foxp3 4384	chr4	63065102	63066602	WT_specific	Akna	-2123	TRUE
Foxp3 3931	chr2	165739841	165740526	WT_specific	AL589902.1	-6851	TRUE
Foxp3 3919	chr2	162928573	162928999	WT_specific	AL591584.1	-10364	TRUE
Foxp3 3930	chr2	165617956	165618737	WT_specific	AL591712.1	16643	TRUE
Foxp3 1926	chr11	85738795	85739266	WT_specific	AL592465.1	-5786	TRUE
Foxp3 1936	chr11	86706914	86708105	WT_specific	AL596111.1	-70411	TRUE
Foxp3 5967	chr11	118961767	118961954	IKcKO_specific	AL662835.1	-2676	FALSE
Foxp3 145	chr2	158544658	158545555	shared	AL663077.1	20319	TRUE
Foxp3 3912	chr2	158548475	158549001	WT_specific	AL663077.1	16873	TRUE
Foxp3 146	chr2	158549079	158550048	shared	AL663077.1	15826	TRUE
Foxp3 3913	chr2	158559532	158559971	WT_specific	AL663077.1	5903	TRUE
Foxp3 6136	chr2	158555309	158555670	IKcKO_specific	AL663077.1	10204	FALSE
Foxp3 2159	chr11	120776964	120777740	WT_specific	AL663090.1	-3169	TRUE
Foxp3 1781	chr11	51745056	51745726	WT_specific	AL669920.1	32158	TRUE
Foxp3 4002	chr3	37182263	37182570	WT_specific	AL691478.1	-26755	TRUE
Foxp3 3883	chr2	152600712	152601672	WT_specific	AL731857.1	-3047	TRUE
Foxp3 3884	chr2	152612985	152613968	WT_specific	AL731857.1	-15343	TRUE
Foxp3 3885	chr2	152614204	152616284	WT_specific	AL731857.1	-17659	TRUE
Foxp3 3886	chr2	152619797	152620511	WT_specific	AL731857.1	-21886	TRUE
Foxp3 3943	chr2	166481172	166481782	WT_specific	AL732357.1	-1140	TRUE
Foxp3 3944	chr2	166491071	166492320	WT_specific	AL732357.1	-11678	TRUE
Foxp3 4467	chr4	131964646	131965055	WT_specific	AL805897.1	-831	FALSE
Foxp3 4529	chr4	138886649	138887092	WT_specific	AL807811.1	7029	TRUE
Foxp3 4757	chr5	122014550	122014926	WT_specific	Aldh2	10210	TRUE
Foxp3 1859	chr11	70110911	70111982	WT_specific	Alox12e	23097	TRUE
Foxp3 898	chr18	65541035	65541944	shared	Alpk2	11598	TRUE
Foxp3 3423	chr18	65542430	65542884	WT_specific	Alpk2	10658	FALSE
Foxp3 3424	chr18	65553405	65553887	WT_specific	Alpk2	-345	FALSE
Foxp3 3425	chr18	65555618	65556311	WT_specific	Alpk2	-2769	TRUE
Foxp3 5784	chr9	110809722	110810047	WT_specific	Als2cl	-19548	TRUE
Foxp3 5785	chr9	110810340	110810736	WT_specific	Als2cl	-20237	TRUE
Foxp3 1428	chr10	40009431	40009765	WT_specific	Amd1	12227	FALSE
Foxp3 5646	chr9	44887253	44888165	WT_specific	Amica1	-899	TRUE
Foxp3 5645	chr9	44886689	44887007	WT_specific	Amica1	259	FALSE
Foxp3 477	chr9	44890825	44891245	shared	Amica1	-3979	TRUE
Foxp3 5647	chr9	44890018	44890526	WT_specific	Amica1	-3260	FALSE
Foxp3 5648	chr9	44891672	44892066	WT_specific	Amica1	-4800	TRUE
Foxp3 2916	chr15	97180936	97181389	WT_specific	Amigo2	-103671	TRUE
Foxp3 2917	chr15	97191198	97192431	WT_specific	Amigo2	-114713	TRUE
Foxp3 2918	chr15	97192579	97193255	WT_specific	Amigo2	-115537	TRUE
Foxp3 2919	chr15	97203202	97203550	WT_specific	Amigo2	-125832	TRUE
Foxp3 822	chr15	97203783	97204186	shared	Amigo2	-126468	TRUE
Foxp3 2920	chr15	97204857	97205196	WT_specific	Amigo2	-127478	TRUE
Foxp3 2921	chr15	97254721	97255673	WT_specific	Amigo2	-177955	TRUE
Foxp3 2922	chr15	97298784	97299191	WT_specific	Amigo2	-221473	TRUE
Foxp3 823	chr15	97299270	97301144	shared	Amigo2	-223426	TRUE
Foxp3 5151	chr6	149141944	149142302	WT_specific	Amn1	-5068	TRUE
Foxp3 4203	chr3	113261837	113262242	WT_specific	Amy1	2694	FALSE
Foxp3 664	chr11	109280854	109282259	shared	Amz2	5001	TRUE
Foxp3 2095	chr11	109293629	109294095	WT_specific	Amz2	-65	TRUE
Foxp3 2096	chr11	109295554	109296166	WT_specific	Amz2	-860	TRUE
Foxp3 4227	chr3	127076412	127076697	WT_specific	Ank2	35252	FALSE
Foxp3 492	chr9	65389142	65390064	shared	Ankdd1a	-25258	TRUE
Foxp3 2486	chr13	97201629	97202051	WT_specific	Ankdd1b	39064	TRUE
Foxp3 1868	chr11	72551733	72552000	WT_specific	Ankfy1	21418	FALSE
Foxp3 5371	chr8	11625589	11625838	WT_specific	Ankrd10	9916	TRUE
Foxp3 5490	chr8	125441316	125442910	WT_specific	Ankrd11	55763	TRUE
Foxp3 5491	chr8	125461627	125462452	WT_specific	Ankrd11	36221	TRUE
Foxp3 5492	chr8	125463138	125463398	WT_specific	Ankrd11	35275	TRUE
Foxp3 5493	chr8	125477025	125477316	WT_specific	Ankrd11	21357	TRUE
Foxp3 5502	chr8	125574669	125574985	WT_specific	Ankrd11	-9088	FALSE
Foxp3 3273	chr17	66311928	66312919	WT_specific	Ankrd12	8815	FALSE
Foxp3 3274	chr17	66313314	66313632	WT_specific	Ankrd12	8102	FALSE
Foxp3 1881	chr11	77297136	77297384	WT_specific	Ankrd13b	5784	TRUE
Foxp3 2589	chr14	32594595	32594937	WT_specific	Ankrd28	48664	TRUE
Foxp3 2590	chr14	32604173	32604561	WT_specific	Ankrd28	39040	FALSE
Foxp3 1009	chr1	54925761	54926089	WT_specific	Ankrd44	57142	FALSE
Foxp3 1010	chr1	54927672	54927958	WT_specific	Ankrd44	55273	TRUE
Foxp3 1011	chr1	54929733	54930054	WT_specific	Ankrd44	53177	FALSE
Foxp3 5856	chr1	54953346	54953621	IKcKO_specific	Ankrd44	29610	TRUE
Foxp3 1013	chr1	54958416	54958984	WT_specific	Ankrd44	24247	FALSE
Foxp3 1012	chr1	54954591	54955124	WT_specific	Ankrd44	28107	TRUE
Foxp3 1014	chr1	54963524	54965017	WT_specific	Ankrd44	18214	TRUE
Foxp3 1015	chr1	54965789	54966234	WT_specific	Ankrd44	16997	TRUE
Foxp3 1016	chr1	54969139	54970063	WT_specific	Ankrd44	13168	TRUE
Foxp3 1017	chr1	54970304	54970611	WT_specific	Ankrd44	12620	TRUE
Foxp3 6029	chr15	36388165	36388435	IKcKO_specific	Ankrd46	38111	TRUE
Foxp3 2520	chr13	113078295	113079237	WT_specific	Ankrd55	-511	TRUE
Foxp3 2521	chr13	113079506	113079996	WT_specific	Ankrd55	-1270	TRUE
Foxp3 2524	chr13	113175639	113175974	WT_specific	Ankrd55	-67312	TRUE
Foxp3 2525	chr13	113178036	113178416	WT_specific	Ankrd55	-69754	TRUE
Foxp3 5823	chr9	122141653	122142408	WT_specific	Ano10	61084	TRUE
Foxp3 5824	chr9	122142633	122143038	WT_specific	Ano10	60454	TRUE
Foxp3 485	chr9	62197106	62198341	shared	Anp32a	-5735	TRUE
Foxp3 5689	chr9	62200849	62202258	WT_specific	Anp32a	-9652	TRUE
Foxp3 486	chr9	62216392	62216865	shared	Anp32a	-2114	TRUE
Foxp3 4348	chr4	46471083	46471475	WT_specific	Anp32b	-7476	TRUE
Foxp3 2560	chr14	26676689	26677239	WT_specific	Anxa11	-15570	TRUE
Foxp3 6216	chr6	86756680	86757039	IKcKO_specific	Anxa4	-13461	TRUE
Foxp3 1814	chr11	54836891	54837417	WT_specific	Anxa6	9500	TRUE
Foxp3 5417	chr8	74796347	74796747	WT_specific	Ap1m1	-19913	TRUE
Foxp3 5418	chr8	74800800	74801386	WT_specific	Ap1m1	-24552	TRUE
Foxp3 5549	chr9	21126663	21127078	WT_specific	Ap1m2	-10301	TRUE
Foxp3 1513	chr10	80210890	80211205	WT_specific	Ap3d1	-6249	FALSE
Foxp3 2558	chr14	21851135	21851517	WT_specific	Ap3m1	2271	TRUE
Foxp3 5453	chr8	96932403	96932968	WT_specific	Ap3s1-ps2	-3960	TRUE
Foxp3 5454	chr8	96935352	96935923	WT_specific	Ap3s1-ps2	-6915	FALSE
Foxp3 5455	chr8	96936896	96937196	WT_specific	Ap3s1-ps2	-8188	TRUE
Foxp3 5456	chr8	96937263	96937549	WT_specific	Ap3s1-ps2	-8541	TRUE
Foxp3 5457	chr8	96937672	96938273	WT_specific	Ap3s1-ps2	-9265	TRUE
Foxp3 5458	chr8	96941787	96942314	WT_specific	Ap3s1-ps2	-13306	TRUE
Foxp3 4803	chr5	138613350	138613854	WT_specific	Ap4m1	-44	TRUE
Foxp3 6104	chr2	22639353	22640102	IKcKO_specific	Apbb1ip	-10137	TRUE
Foxp3 6105	chr2	22666426	22666751	IKcKO_specific	Apbb1ip	-36786	TRUE
Foxp3 5713	chr9	66701261	66701594	WT_specific	Aph1c	-19061	FALSE
Foxp3 5050	chr6	122552242	122552929	WT_specific	Apobec1	-547	TRUE
Foxp3 3252	chr17	48565250	48565767	WT_specific	Apobec2	6286	TRUE
Foxp3 2872	chr15	79722005	79722645	WT_specific	Apobec3	-157	TRUE
Foxp3 2873	chr15	79723672	79724252	WT_specific	Apobec3	-1285	TRUE
Foxp3 2874	chr15	79724441	79724650	WT_specific	Apobec3	803	FALSE
Foxp3 2875	chr15	79725311	79726156	WT_specific	Apobec3	-465	TRUE
Foxp3 2876	chr15	79726372	79727361	WT_specific	Apobec3	-1670	TRUE
Foxp3 2877	chr15	79730730	79731482	WT_specific	Apobec3	-850	TRUE
Foxp3 2086	chr11	108134302	108135159	WT_specific	Apoh	69509	TRUE
Foxp3 2087	chr11	108135333	108135752	WT_specific	Apoh	68916	TRUE
Foxp3 2088	chr11	108143981	108144553	WT_specific	Apoh	60115	TRUE
Foxp3 2860	chr15	77563765	77564185	WT_specific	Apol9b	-4634	TRUE
Foxp3 2505	chr13	108358331	108358602	WT_specific	Apoo-ps	-153785	TRUE
Foxp3 4335	chr4	40649767	40650505	WT_specific	Aptx	-285	TRUE
Foxp3 393	chr7	104897138	104898207	shared	Aqp11	-11450	TRUE
Foxp3 3822	chr2	113970640	113971221	WT_specific	Aqr	-4342	TRUE
Foxp3 4633	chr5	63168716	63168977	WT_specific	Arap2	-11540	FALSE
Foxp3 6073	chr18	6149892	6150082	IKcKO_specific	Arhgap12	-13986	FALSE
Foxp3 3725	chr2	43593381	43593650	WT_specific	Arhgap15	10694	TRUE
Foxp3 108	chr2	43593900	43594841	shared	Arhgap15	9503	TRUE
Foxp3 1407	chr10	26472563	26473376	WT_specific	Arhgap18	-149	TRUE
Foxp3 536	chr10	26519411	26520010	shared	Arhgap18	22398	TRUE
Foxp3 332	chr6	87452382	87453453	shared	Arhgap25	-7145	TRUE
Foxp3 6218	chr6	87453753	87454228	IKcKO_specific	Arhgap25	-7920	TRUE
Foxp3 4977	chr6	87463079	87463913	WT_specific	Arhgap25	-17605	TRUE
Foxp3 333	chr6	87482483	87483300	shared	Arhgap25	-47	TRUE
Foxp3 334	chr6	87484993	87485636	shared	Arhgap25	-2383	TRUE
Foxp3 6219	chr6	87485775	87486053	IKcKO_specific	Arhgap25	-2800	TRUE
Foxp3 335	chr6	87486207	87487625	shared	Arhgap25	-4372	TRUE
Foxp3 4979	chr6	87499724	87499937	WT_specific	Arhgap25	-16684	FALSE
Foxp3 336	chr6	87491894	87492428	shared	Arhgap25	-9175	TRUE
Foxp3 4978	chr6	87497653	87498182	WT_specific	Arhgap25	-14929	TRUE
Foxp3 3396	chr18	39242146	39242628	WT_specific	Arhgap26	16337	TRUE
Foxp3 3397	chr18	39243505	39243865	WT_specific	Arhgap26	15100	TRUE
Foxp3 1267	chr1	173321484	173321832	WT_specific	Arhgap30	-2741	FALSE
Foxp3 2859	chr15	76588789	76589303	WT_specific	Arhgap39	-33270	FALSE
Foxp3 367	chr6	136889190	136890615	shared	Arhgdib	-195	TRUE
Foxp3 5113	chr6	136881935	136882242	WT_specific	Arhgdib	5870	FALSE
Foxp3 5114	chr6	136892066	136892539	WT_specific	Arhgdib	-2119	FALSE
Foxp3 5115	chr6	136895503	136895741	WT_specific	Arhgdib	-5321	TRUE
Foxp3 419	chr8	14985286	14986296	shared	Arhgef10	4063	TRUE
Foxp3 5379	chr8	14993858	14994215	WT_specific	Arhgef10	1921	TRUE
Foxp3 5380	chr8	14994326	14994707	WT_specific	Arhgef10	1429	TRUE
Foxp3 2563	chr14	28005641	28006102	WT_specific	Arhgef3	45123	TRUE
Foxp3 2564	chr14	28041854	28043792	WT_specific	Arhgef3	7433	TRUE
Foxp3 2565	chr14	28047349	28047748	WT_specific	Arhgef3	3477	TRUE
Foxp3 2567	chr14	28049168	28049867	WT_specific	Arhgef3	1358	TRUE
Foxp3 2566	chr14	28048318	28048634	WT_specific	Arhgef3	2591	FALSE
Foxp3 2568	chr14	28050895	28051772	WT_specific	Arhgef3	-547	TRUE
Foxp3 2569	chr14	28052656	28053318	WT_specific	Arhgef3	-2093	TRUE
Foxp3 2571	chr14	28062858	28063261	WT_specific	Arhgef3	-12036	TRUE
Foxp3 2570	chr14	28061216	28061888	WT_specific	Arhgef3	-10663	FALSE
Foxp3 2574	chr14	28154360	28154657	WT_specific	Arhgef3	-5386	TRUE
Foxp3 2572	chr14	28064595	28065028	WT_specific	Arhgef3	-13803	FALSE
Foxp3 2573	chr14	28151515	28151853	WT_specific	Arhgef3	-2582	FALSE
Foxp3 2575	chr14	28154748	28155051	WT_specific	Arhgef3	-5780	TRUE
Foxp3 2576	chr14	28158339	28159135	WT_specific	Arhgef3	-9864	TRUE
Foxp3 2579	chr14	28164228	28164883	WT_specific	Arhgef3	-15612	TRUE
Foxp3 2577	chr14	28160881	28161583	WT_specific	Arhgef3	-12312	FALSE
Foxp3 2578	chr14	28163751	28164076	WT_specific	Arhgef3	-14805	FALSE
Foxp3 762	chr14	28168585	28169486	shared	Arhgef3	-20215	TRUE
Foxp3 2580	chr14	28171309	28171663	WT_specific	Arhgef3	-22392	TRUE
Foxp3 6005	chr14	28044761	28045051	IKcKO_specific	Arhgef3	6174	FALSE
Foxp3 3319	chr17	80722991	80723275	WT_specific	Arhgef33	-16528	TRUE
Foxp3 3418	chr18	61649032	61649651	WT_specific	Arhgef37	19282	TRUE
Foxp3 4491	chr4	133262535	133263323	WT_specific	Arid1a	13368	TRUE
Foxp3 255	chr4	133285422	133286286	shared	Arid1a	-6492	TRUE
Foxp3 4492	chr4	133271997	133272386	WT_specific	Arid1a	4305	FALSE
Foxp3 4493	chr4	133302463	133302752	WT_specific	Arid1a	6774	TRUE
Foxp3 2224	chr12	72153382	72153680	WT_specific	Arid4a	-4352	FALSE
Foxp3 946	chr1	36350080	36350581	WT_specific	Arid5a	13997	TRUE
Foxp3 947	chr1	36350845	36351377	WT_specific	Arid5a	13201	TRUE
Foxp3 948	chr1	36353118	36353561	WT_specific	Arid5a	11017	TRUE
Foxp3 949	chr1	36353732	36354284	WT_specific	Arid5a	10294	TRUE
Foxp3 2	chr1	36366038	36366610	shared	Arid5a	-1986	TRUE
Foxp3 950	chr1	36365321	36365616	WT_specific	Arid5a	-992	FALSE
Foxp3 1479	chr10	67600477	67600761	WT_specific	Arid5b	-1387	TRUE
Foxp3 5914	chr10	67631155	67631394	IKcKO_specific	Arid5b	-32020	TRUE
Foxp3 1480	chr10	67617923	67618264	WT_specific	Arid5b	-18890	FALSE
Foxp3 1481	chr10	67643806	67644358	WT_specific	Arid5b	-44984	FALSE
Foxp3 1482	chr10	67701186	67701731	WT_specific	Arid5b	39743	TRUE
Foxp3 5916	chr10	67701936	67702572	IKcKO_specific	Arid5b	38902	TRUE
Foxp3 1483	chr10	67702623	67703079	WT_specific	Arid5b	38395	TRUE
Foxp3 549	chr10	67703952	67704304	shared	Arid5b	37170	TRUE
Foxp3 1486	chr10	67733145	67733380	WT_specific	Arid5b	8094	FALSE
Foxp3 1484	chr10	67711294	67711609	WT_specific	Arid5b	29865	TRUE
Foxp3 1485	chr10	67712266	67712642	WT_specific	Arid5b	28832	TRUE
Foxp3 5915	chr10	67657163	67657387	IKcKO_specific	Arid5b	-58013	FALSE
Foxp3 1487	chr10	67819947	67820345	WT_specific	Arid5b	-78871	TRUE
Foxp3 4067	chr3	68981263	68981691	WT_specific	Arl14	44650	TRUE
Foxp3 4068	chr3	69009358	69009955	WT_specific	Arl14	16386	TRUE
Foxp3 4069	chr3	69037866	69038176	WT_specific	Arl14	-11835	FALSE
Foxp3 2540	chr13	114659775	114660240	WT_specific	Arl15	-75410	TRUE
Foxp3 1094	chr1	90519725	90519991	WT_specific	Arl4c	78460	FALSE
Foxp3 1095	chr1	90550974	90553553	WT_specific	Arl4c	44898	TRUE
Foxp3 1096	chr1	90605318	90605730	WT_specific	Arl4c	-6934	TRUE
Foxp3 1097	chr1	90632506	90632832	WT_specific	Arl4c	-34036	FALSE
Foxp3 89	chr2	14970650	14971147	shared	Arl5b	-125	TRUE
Foxp3 1975	chr11	97860964	97861390	WT_specific	Arl5c	-3895	TRUE
Foxp3 4987	chr6	97161946	97162453	WT_specific	Arl6ip5	-1770	FALSE
Foxp3 4988	chr6	97171538	97172633	WT_specific	Arl6ip5	-11950	TRUE
Foxp3 1436	chr10	41657130	41657385	WT_specific	Armc2	38543	TRUE
Foxp3 4129	chr3	95272804	95273099	WT_specific	Arnt	-2889	FALSE
Foxp3 5149	chr6	146725144	146725413	WT_specific	Arntl2	19164	TRUE
Foxp3 6202	chr5	145830268	145830969	IKcKO_specific	Arpc1a	13730	TRUE
Foxp3 1057	chr1	74296214	74296496	WT_specific	Arpc2	-13372	TRUE
Foxp3 2099	chr11	109406714	109407210	WT_specific	Arsg	-2142	TRUE
Foxp3 2100	chr11	109422006	109422337	WT_specific	Arsg	-17269	TRUE
Foxp3 5287	chr7	108699422	108700143	WT_specific	Art2a-ps	9236	TRUE
Foxp3 4688	chr5	92804263	92805380	WT_specific	Art3	621	TRUE
Foxp3 2815	chr15	64017185	64017894	WT_specific	Asap1	22159	TRUE
Foxp3 2816	chr15	64038261	64038551	WT_specific	Asap1	1502	TRUE
Foxp3 6034	chr15	64042264	64042579	IKcKO_specific	Asap1	-2526	TRUE
Foxp3 2817	chr15	64044178	64044824	WT_specific	Asap1	-4771	TRUE
Foxp3 2818	chr15	64066086	64066474	WT_specific	Asap1	-26421	TRUE
Foxp3 2819	chr15	64066689	64066980	WT_specific	Asap1	-26927	TRUE
Foxp3 2821	chr15	64095912	64096266	WT_specific	Asap1	46985	FALSE
Foxp3 2820	chr15	64078031	64078305	WT_specific	Asap1	-38252	TRUE
Foxp3 2318	chr12	104569838	104570739	WT_specific	Asb2	3055	TRUE
Foxp3 2319	chr12	104579143	104579724	WT_specific	Asb2	-3141	TRUE
Foxp3 5443	chr8	87549097	87549322	WT_specific	Asna1	-145	TRUE
Foxp3 4975	chr6	86556398	86557112	WT_specific	Asprv1	21056	TRUE
Foxp3 1903	chr11	79900319	79900713	WT_specific	Atad5	2189	TRUE
Foxp3 5108	chr6	136480382	136480722	WT_specific	Atf7ip	-13350	TRUE
Foxp3 5109	chr6	136481086	136481627	WT_specific	Atf7ip	-14255	TRUE
Foxp3 5110	chr6	136499184	136499447	WT_specific	Atf7ip	-32075	FALSE
Foxp3 6236	chr6	136511250	136511573	IKcKO_specific	Atf7ip	-44201	FALSE
Foxp3 381	chr7	65932717	65933086	shared	Atp10a	-19514	TRUE
Foxp3 4670	chr5	72610924	72611414	WT_specific	Atp10d	-16822	FALSE
Foxp3 4000	chr3	35664263	35664730	WT_specific	Atp11b	-11674	TRUE
Foxp3 499	chr9	96299390	96299917	shared	Atp1b3	-35151	FALSE
Foxp3 5750	chr9	96294871	96295705	WT_specific	Atp1b3	-30939	TRUE
Foxp3 5751	chr9	96295894	96296249	WT_specific	Atp1b3	-31483	TRUE
Foxp3 5752	chr9	96296575	96297444	WT_specific	Atp1b3	-32678	FALSE
Foxp3 5753	chr9	96300040	96300325	WT_specific	Atp1b3	-35559	TRUE
Foxp3 565	chr10	98207397	98208334	shared	Atp2b1	169452	TRUE
Foxp3 1566	chr10	98237406	98237700	WT_specific	Atp2b1	140086	TRUE
Foxp3 1567	chr10	98244505	98245048	WT_specific	Atp2b1	132738	TRUE
Foxp3 1568	chr10	98269837	98270042	WT_specific	Atp2b1	107744	FALSE
Foxp3 1569	chr10	98345259	98345618	WT_specific	Atp2b1	32168	FALSE
Foxp3 5926	chr10	98342832	98343136	IKcKO_specific	Atp2b1	34650	TRUE
Foxp3 34	chr1	135711716	135713648	shared	Atp2b4	-16030	TRUE
Foxp3 3095	chr16	91963852	91964506	WT_specific	Atp5o	-32574	TRUE
Foxp3 2217	chr12	70836165	70836427	WT_specific	Atp5s	-10478	FALSE
Foxp3 3146	chr17	26799349	26800428	WT_specific	Atp6v0e	12913	TRUE
Foxp3 5881	chr1	140144477	140144764	IKcKO_specific	Atp6v1g3	25551	TRUE
Foxp3 41	chr1	140196022	140196846	shared	Atp6v1g3	-26531	TRUE
Foxp3 42	chr1	140199460	140200057	shared	Atp6v1g3	-29742	TRUE
Foxp3 1181	chr1	140187272	140187513	WT_specific	Atp6v1g3	-17198	FALSE
Foxp3 43	chr1	140200512	140201644	shared	Atp6v1g3	-31329	TRUE
Foxp3 1182	chr1	140224053	140224377	WT_specific	Atp6v1g3	-54062	TRUE
Foxp3 1183	chr1	140245094	140245421	WT_specific	Atp6v1g3	-75106	TRUE
Foxp3 2416	chr13	45935350	45935672	WT_specific	Atxn1	124654	TRUE
Foxp3 730	chr13	45945562	45946200	shared	Atxn1	114126	TRUE
Foxp3 731	chr13	45967094	45967435	shared	Atxn1	92891	TRUE
Foxp3 732	chr13	45967517	45968351	shared	Atxn1	91975	TRUE
Foxp3 2418	chr13	45977911	45978846	WT_specific	Atxn1	81480	TRUE
Foxp3 2419	chr13	45979359	45979687	WT_specific	Atxn1	80639	TRUE
Foxp3 2417	chr13	45945015	45945360	WT_specific	Atxn1	114966	FALSE
Foxp3 733	chr13	45980260	45980700	shared	Atxn1	79626	TRUE
Foxp3 2420	chr13	45984433	45984847	WT_specific	Atxn1	75479	TRUE
Foxp3 2421	chr13	45999091	45999553	WT_specific	Atxn1	60773	TRUE
Foxp3 2422	chr13	46001703	46002733	WT_specific	Atxn1	57593	TRUE
Foxp3 734	chr13	46017985	46019693	shared	Atxn1	40633	TRUE
Foxp3 2423	chr13	46020045	46021026	WT_specific	Atxn1	39300	TRUE
Foxp3 2424	chr13	46026521	46026799	WT_specific	Atxn1	33527	FALSE
Foxp3 2425	chr13	46027732	46028334	WT_specific	Atxn1	31992	TRUE
Foxp3 2184	chr12	33844779	33845044	WT_specific	Atxn7l1	-12374	TRUE
Foxp3 2185	chr12	33845240	33845665	WT_specific	Atxn7l1	-12995	TRUE
Foxp3 2187	chr12	33857836	33858648	WT_specific	Atxn7l1	-25978	TRUE
Foxp3 2188	chr12	33860414	33860978	WT_specific	Atxn7l1	-28308	TRUE
Foxp3 2189	chr12	33861058	33861397	WT_specific	Atxn7l1	-28727	TRUE
Foxp3 2186	chr12	33856921	33857178	WT_specific	Atxn7l1	-24508	FALSE
Foxp3 2190	chr12	33866907	33867819	WT_specific	Atxn7l1	-35149	TRUE
Foxp3 677	chr12	33986886	33987379	shared	Atxn7l1	1	TRUE
Foxp3 678	chr12	33987592	33988362	shared	Atxn7l1	-982	TRUE
Foxp3 679	chr12	33999723	34000471	shared	Atxn7l1	-201	TRUE
Foxp3 2191	chr12	34001090	34002150	WT_specific	Atxn7l1	-1880	TRUE
Foxp3 3873	chr2	132433270	132434270	WT_specific	AU019990	-10339	TRUE
Foxp3 140	chr2	132468700	132469596	shared	AU019990	2021	TRUE
Foxp3 2439	chr13	52888682	52889360	WT_specific	Auh	125241	TRUE
Foxp3 2440	chr13	52896446	52896907	WT_specific	Auh	117694	TRUE
Foxp3 740	chr13	52902194	52903809	shared	Auh	110792	TRUE
Foxp3 2443	chr13	52918132	52918622	WT_specific	Auh	95979	TRUE
Foxp3 2441	chr13	52905172	52905513	WT_specific	Auh	109088	FALSE
Foxp3 2442	chr13	52907000	52907701	WT_specific	Auh	106900	FALSE
Foxp3 2444	chr13	52923354	52923817	WT_specific	Auh	90784	TRUE
Foxp3 741	chr13	52924195	52924839	shared	Auh	89762	TRUE
Foxp3 2445	chr13	53008152	53008479	WT_specific	Auh	6122	FALSE
Foxp3 2446	chr13	53017441	53017678	WT_specific	Auh	1535	TRUE
Foxp3 1159	chr1	133509888	133510439	WT_specific	Avpr1b	-14623	TRUE
Foxp3 3499	chr19	11125356	11126022	WT_specific	AW112010	-966	FALSE
Foxp3 2089	chr11	108772298	108772660	WT_specific	Axin2	9003	TRUE
Foxp3 6241	chr7	26567337	26567643	IKcKO_specific	Axl	4442	TRUE
Foxp3 1965	chr11	95588799	95589050	WT_specific	B130006D01Rik	-4149	FALSE
Foxp3 1961	chr11	93974373	93974776	WT_specific	B230206L02Rik	20023	FALSE
Foxp3 3604	chr19	57429832	57430773	WT_specific	B230217O12Rik	4492	TRUE
Foxp3 2453	chr13	55774423	55774819	WT_specific	B230219D22Rik	19666	TRUE
Foxp3 6150	chr3	94771121	94771485	IKcKO_specific	B230398E01Rik	-5515	FALSE
Foxp3 3838	chr2	121972399	121972702	WT_specific	B2m	720	FALSE
Foxp3 3839	chr2	121973436	121973958	WT_specific	B2m	-536	TRUE
Foxp3 2160	chr11	121516879	121517287	WT_specific	B3gntl1	17180	TRUE
Foxp3 5366	chr7	148233560	148234178	WT_specific	B4galnt4	12995	TRUE
Foxp3 5367	chr7	148234633	148235275	WT_specific	B4galnt4	11898	TRUE
Foxp3 4341	chr4	40829499	40830005	WT_specific	B4galt1	-28967	FALSE
Foxp3 5893	chr1	173192992	173193219	IKcKO_specific	B4galt3	7240	TRUE
Foxp3 3947	chr2	167154775	167155173	WT_specific	B4galt5	-15773	FALSE
Foxp3 3948	chr2	167164041	167164414	WT_specific	B4galt5	10269	FALSE
Foxp3 3949	chr2	167192317	167193628	WT_specific	B4galt5	-18945	TRUE
Foxp3 3950	chr2	167193925	167194356	WT_specific	B4galt5	-19673	TRUE
Foxp3 1575	chr10	98855175	98855429	WT_specific	B530045E10Rik	27727	TRUE
Foxp3 2970	chr16	23170319	23170624	WT_specific	B630019A10Rik	4737	FALSE
Foxp3 4591	chr4	155062395	155062646	WT_specific	B930041F14Rik	5805	FALSE
Foxp3 212	chr4	32335742	32336294	shared	Bach2	-1555	FALSE
Foxp3 4311	chr4	32316459	32316729	WT_specific	Bach2	9050	TRUE
Foxp3 4312	chr4	32335281	32335686	WT_specific	Bach2	-947	TRUE
Foxp3 220	chr4	32422055	32423040	shared	Bach2	81370	TRUE
Foxp3 4321	chr4	32429219	32429535	WT_specific	Bach2	74875	TRUE
Foxp3 221	chr4	32430090	32431633	shared	Bach2	72777	TRUE
Foxp3 4322	chr4	32438177	32438547	WT_specific	Bach2	65863	TRUE
Foxp3 4323	chr4	32438811	32439134	WT_specific	Bach2	65276	TRUE
Foxp3 4320	chr4	32425595	32426189	WT_specific	Bach2	78221	FALSE
Foxp3 4325	chr4	32450882	32451126	WT_specific	Bach2	53284	TRUE
Foxp3 4326	chr4	32462649	32463074	WT_specific	Bach2	41336	TRUE
Foxp3 4327	chr4	32463330	32463956	WT_specific	Bach2	40454	TRUE
Foxp3 4324	chr4	32439508	32440102	WT_specific	Bach2	64308	FALSE
Foxp3 222	chr4	32474400	32475328	shared	Bach2	29082	TRUE
Foxp3 223	chr4	32492379	32493309	shared	Bach2	11101	TRUE
Foxp3 224	chr4	32511208	32512468	shared	Bach2	-8058	TRUE
Foxp3 4328	chr4	32491099	32491745	WT_specific	Bach2	12665	FALSE
Foxp3 4329	chr4	32568752	32569160	WT_specific	Bach2	19320	TRUE
Foxp3 6168	chr4	32675236	32675506	IKcKO_specific	Bach2	-13600	TRUE
Foxp3 2158	chr11	120177125	120177452	WT_specific	Bahcc1	-26345	TRUE
Foxp3 2290	chr12	87007038	87007371	WT_specific	Batf	20248	TRUE
Foxp3 2202	chr12	56107030	56107715	WT_specific	Baz1a	-7626	FALSE
Foxp3 5971	chr12	55981047	55981403	IKcKO_specific	Baz1a	14738	FALSE
Foxp3 3742	chr2	59856944	59857432	WT_specific	Baz2b	-13185	TRUE
Foxp3 569	chr10	110669823	110670144	shared	Bbs10	65591	FALSE
Foxp3 1580	chr10	110672308	110672636	WT_specific	Bbs10	63099	FALSE
Foxp3 1581	chr10	110758735	110758971	WT_specific	Bbs10	-23236	FALSE
Foxp3 3757	chr2	69473253	69473590	WT_specific	Bbs5	11638	TRUE
Foxp3 5553	chr9	22429405	22429948	WT_specific	Bbs9	10161	TRUE
Foxp3 3157	chr17	29417041	29418287	WT_specific	BC004004	737	TRUE
Foxp3 720	chr13	24877814	24878506	shared	BC005537	15020	TRUE
Foxp3 5546	chr9	15335664	15336193	WT_specific	BC017612	-26262	TRUE
Foxp3 3459	chr19	4059091	4060176	WT_specific	BC021614	-881	TRUE
Foxp3 3460	chr19	4061056	4061523	WT_specific	BC021614	-2228	TRUE
Foxp3 3461	chr19	4066325	4066851	WT_specific	BC021614	-7556	TRUE
Foxp3 1515	chr10	81069171	81069534	WT_specific	BC025920	94	TRUE
Foxp3 5896	chr1	182778734	182779149	IKcKO_specific	BC031781	2133	TRUE
Foxp3 3195	chr17	34039402	34039730	WT_specific	BC033916	2350	TRUE
Foxp3 233	chr4	94772038	94774144	shared	BC042782	-8749	TRUE
Foxp3 5754	chr9	96326687	96326935	WT_specific	BC043934	10918	FALSE
Foxp3 2457	chr13	60839412	60840025	WT_specific	BC051665	47697	TRUE
Foxp3 4273	chr3	145568198	145568649	WT_specific	Bcl10	18673	TRUE
Foxp3 4274	chr3	145579332	145579636	WT_specific	Bcl10	7686	TRUE
Foxp3 2338	chr12	109230885	109232038	WT_specific	Bcl11b	9586	TRUE
Foxp3 2339	chr12	109232802	109234124	WT_specific	Bcl11b	7500	FALSE
Foxp3 1124	chr1	108543424	108543715	WT_specific	Bcl2	67136	FALSE
Foxp3 1125	chr1	108584317	108585055	WT_specific	Bcl2	25796	TRUE
Foxp3 141	chr2	152650736	152651461	shared	Bcl2l1	2810	TRUE
Foxp3 3887	chr2	152651615	152651876	WT_specific	Bcl2l1	2395	TRUE
Foxp3 4185	chr3	103634319	103634571	WT_specific	Bcl2l15	1953	FALSE
Foxp3 2979	chr16	24151208	24151675	WT_specific	Bcl6	-162737	TRUE
Foxp3 831	chr16	24155477	24155757	shared	Bcl6	-166819	TRUE
Foxp3 5661	chr9	50355797	50356398	WT_specific	Bco2	6888	TRUE
Foxp3 5662	chr9	50356472	50356714	WT_specific	Bco2	6572	TRUE
Foxp3 1	chr1	33940365	33940709	shared	Bend6	-22	TRUE
Foxp3 2991	chr16	32177047	32177594	WT_specific	Bex6	8684	TRUE
Foxp3 6043	chr16	32200357	32200821	IKcKO_specific	Bex6	-14543	TRUE
Foxp3 452	chr9	7829649	7830384	shared	Birc2	4871	TRUE
Foxp3 6279	chr9	7871579	7872414	IKcKO_specific	Birc3	443	TRUE
Foxp3 5244	chr7	87699525	87699805	WT_specific	Blm	-19800	TRUE
Foxp3 658	chr11	106966686	106967129	shared	Bptf	25751	FALSE
Foxp3 2067	chr11	106965144	106965398	WT_specific	Bptf	27482	FALSE
Foxp3 2068	chr11	107002082	107002569	WT_specific	Bptf	-9128	FALSE
Foxp3 4621	chr5	32028595	32028948	WT_specific	Bre	-24725	TRUE
Foxp3 6267	chr8	74061503	74061810	IKcKO_specific	Bst2	-474	TRUE
Foxp3 4434	chr4	116798213	116798775	WT_specific	Btbd19	-512	TRUE
Foxp3 1509	chr10	80121039	80121454	WT_specific	Btbd2	-1638	TRUE
Foxp3 3171	chr17	30696271	30696821	WT_specific	Btbd9	16411	TRUE
Foxp3 562	chr10	95863574	95864064	shared	Btg1	215571	TRUE
Foxp3 1552	chr10	95869137	95870012	WT_specific	Btg1	209623	TRUE
Foxp3 5925	chr10	95872664	95872987	IKcKO_specific	Btg1	206648	TRUE
Foxp3 1551	chr10	95861694	95862009	WT_specific	Btg1	217626	FALSE
Foxp3 1555	chr10	96050229	96050601	WT_specific	Btg1	29034	TRUE
Foxp3 1553	chr10	95871490	95871962	WT_specific	Btg1	207673	FALSE
Foxp3 1554	chr10	95882811	95883203	WT_specific	Btg1	196432	FALSE
Foxp3 563	chr10	96061931	96062610	shared	Btg1	17025	TRUE
Foxp3 564	chr10	96071675	96072495	shared	Btg1	7140	TRUE
Foxp3 1556	chr10	96072808	96073296	WT_specific	Btg1	6339	TRUE
Foxp3 1557	chr10	96088190	96088642	WT_specific	Btg1	-9007	TRUE
Foxp3 1558	chr10	96091322	96091901	WT_specific	Btg1	-12266	TRUE
Foxp3 1559	chr10	96153123	96153825	WT_specific	Btg1	-74190	TRUE
Foxp3 1560	chr10	96156330	96156776	WT_specific	Btg1	-77141	TRUE
Foxp3 1562	chr10	96164334	96164677	WT_specific	Btg1	-85042	FALSE
Foxp3 1561	chr10	96160083	96160947	WT_specific	Btg1	-81312	TRUE
Foxp3 1563	chr10	96183873	96184420	WT_specific	Btg1	-104785	TRUE
Foxp3 1565	chr10	96189079	96189512	WT_specific	Btg1	-109877	FALSE
Foxp3 1564	chr10	96187003	96188064	WT_specific	Btg1	-108429	TRUE
Foxp3 1161	chr1	135963743	135964397	WT_specific	Btg2	11300	TRUE
Foxp3 838	chr16	45224167	45224828	shared	Btla	-378	TRUE
Foxp3 628	chr11	58741335	58741947	shared	Btnl10	-10388	TRUE
Foxp3 3831	chr2	118466090	118466600	WT_specific	Bub1b	-9324	FALSE
Foxp3 6132	chr2	118443649	118443984	IKcKO_specific	Bub1b	11595	FALSE
Foxp3 3928	chr2	164634183	164634653	WT_specific	BX323066.1	2391	FALSE
Foxp3 1907	chr11	80322147	80322521	WT_specific	C030013C21Rik	87	TRUE
Foxp3 5111	chr6	136782964	136783267	WT_specific	C030030A07Rik	704	FALSE
Foxp3 5169	chr7	28473862	28474883	WT_specific	C030039L03Rik	-524	TRUE
Foxp3 2280	chr12	85567865	85568183	WT_specific	C130039O16Rik	-8352	FALSE
Foxp3 6207	chr6	7793828	7794049	IKcKO_specific	C1galt1	793	TRUE
Foxp3 2866	chr15	78344632	78345073	WT_specific	C1qtnf6	12684	TRUE
Foxp3 2369	chr13	23522629	23522960	WT_specific	C230035I16Rik	-265	TRUE
Foxp3 2370	chr13	23524443	23524698	WT_specific	C230035I16Rik	-1807	TRUE
Foxp3 4718	chr5	106043125	106043749	WT_specific	C230066G23Rik	-34290	TRUE
Foxp3 4719	chr5	106044749	106045314	WT_specific	C230066G23Rik	-35855	TRUE
Foxp3 5280	chr7	107528652	107529107	WT_specific	C2cd3	-6179	FALSE
Foxp3 3327	chr17	84249773	84250213	WT_specific	C430042M11Rik	3520	TRUE
Foxp3 4970	chr6	86388372	86388761	WT_specific	C87436	-40	TRUE
Foxp3 2928	chr15	98453209	98453500	WT_specific	Cacnb3	9151	FALSE
Foxp3 2929	chr15	98453616	98454223	WT_specific	Cacnb3	8428	TRUE
Foxp3 3731	chr2	52425886	52426676	WT_specific	Cacnb4	-12589	TRUE
Foxp3 3732	chr2	52427018	52427425	WT_specific	Cacnb4	-13338	TRUE
Foxp3 1222	chr1	162177505	162178000	WT_specific	Cacybp	-35092	TRUE
Foxp3 3618	chr2	5563449	5563951	WT_specific	Camk1d	33141	TRUE
Foxp3 4222	chr3	126293333	126293793	WT_specific	Camk2d	5427	FALSE
Foxp3 4223	chr3	126312398	126312609	WT_specific	Camk2d	-12251	TRUE
Foxp3 2556	chr14	21585122	21585572	WT_specific	Camk2g	27704	TRUE
Foxp3 6182	chr4	138016910	138017125	IKcKO_specific	Camk2n1	-6896	FALSE
Foxp3 4772	chr5	123242926	123243186	WT_specific	Camkk2	-13795	FALSE
Foxp3 5783	chr9	109758566	109758831	WT_specific	Camp	-6861	FALSE
Foxp3 1614	chr10	118487347	118487814	WT_specific	Cand1	157451	TRUE
Foxp3 1615	chr10	118656537	118656811	WT_specific	Cand1	-7146	TRUE
Foxp3 241	chr4	122548608	122549214	shared	Cap1	-7339	TRUE
Foxp3 4441	chr4	122544671	122545017	WT_specific	Cap1	-3142	FALSE
Foxp3 4948	chr6	72488940	72489284	WT_specific	Capg	5101	TRUE
Foxp3 328	chr6	72494143	72494772	shared	Capg	-241	TRUE
Foxp3 4949	chr6	72502464	72503240	WT_specific	Capg	-308	TRUE
Foxp3 3303	chr17	73654364	73655462	WT_specific	Capn13	93174	TRUE
Foxp3 4528	chr4	138755148	138756592	WT_specific	Capzb	-1410	TRUE
Foxp3 5712	chr9	66533535	66533992	WT_specific	Car12	27501	FALSE
Foxp3 4809	chr5	141494365	141494774	WT_specific	Card11	-18224	TRUE
Foxp3 6021	chr15	5057707	5057979	IKcKO_specific	Card6	505	TRUE
Foxp3 5407	chr8	47726080	47726325	WT_specific	Casp3	-23522	FALSE
Foxp3 1026	chr1	58858816	58859119	WT_specific	Casp8	227	TRUE
Foxp3 10	chr1	58859266	58859965	shared	Casp8	-619	TRUE
Foxp3 1027	chr1	58860089	58860426	WT_specific	Casp8	-1080	TRUE
Foxp3 1028	chr1	58864226	58864537	WT_specific	Casp8	-5191	FALSE
Foxp3 5858	chr1	58861689	58862050	IKcKO_specific	Casp8	-2704	FALSE
Foxp3 5859	chr1	58865092	58865357	IKcKO_specific	Casp8	-6011	FALSE
Foxp3 3969	chr2	172218696	172219428	WT_specific	Cass4	-28	TRUE
Foxp3 3970	chr2	172219645	172220370	WT_specific	Cass4	-970	TRUE
Foxp3 3971	chr2	172224871	172225547	WT_specific	Cass4	-6147	TRUE
Foxp3 3972	chr2	172225672	172226140	WT_specific	Cass4	-6740	TRUE
Foxp3 157	chr2	172226610	172227417	shared	Cass4	-8017	TRUE
Foxp3 3039	chr16	52055351	52055881	WT_specific	Cblb	-24162	TRUE
Foxp3 3040	chr16	52060413	52060976	WT_specific	Cblb	-29257	TRUE
Foxp3 3041	chr16	52061618	52062549	WT_specific	Cblb	-30830	TRUE
Foxp3 6051	chr16	52067701	52068052	IKcKO_specific	Cblb	-36333	TRUE
Foxp3 3043	chr16	52143178	52143561	WT_specific	Cblb	9078	TRUE
Foxp3 3044	chr16	52148129	52148717	WT_specific	Cblb	3922	FALSE
Foxp3 844	chr16	52147400	52147771	shared	Cblb	4868	TRUE
Foxp3 6270	chr8	89842487	89842695	IKcKO_specific	Cbln1	152272	FALSE
Foxp3 6265	chr8	63929296	63929774	IKcKO_specific	Cbr4	36757	TRUE
Foxp3 431	chr8	63929948	63930392	shared	Cbr4	36139	TRUE
Foxp3 1971	chr11	96646220	96646566	WT_specific	Cbx1	3875	FALSE
Foxp3 4922	chr6	51427250	51427474	WT_specific	Cbx3	-6729	FALSE
Foxp3 2878	chr15	79762227	79762411	WT_specific	Cbx7	535	TRUE
Foxp3 4272	chr3	142363115	142363372	WT_specific	Ccbl2	643	TRUE
Foxp3 5334	chr7	133786438	133787064	WT_specific	Ccdc101	5759	TRUE
Foxp3 1449	chr10	59106082	59106646	WT_specific	Ccdc109a	-27206	TRUE
Foxp3 4611	chr5	20916736	20917169	WT_specific	Ccdc146	13326	TRUE
Foxp3 4612	chr5	20917455	20917731	WT_specific	Ccdc146	12764	TRUE
Foxp3 1434	chr10	41334563	41334868	WT_specific	Ccdc162	-27309	TRUE
Foxp3 1435	chr10	41409973	41410632	WT_specific	Ccdc162	18474	TRUE
Foxp3 4432	chr4	116381046	116381382	WT_specific	Ccdc163	-73	TRUE
Foxp3 1279	chr1	174456083	174456405	WT_specific	Ccdc19	-225	TRUE
Foxp3 1490	chr10	69579428	69579847	WT_specific	Ccdc6	-19978	TRUE
Foxp3 1491	chr10	69643581	69643893	WT_specific	Ccdc6	-6098	TRUE
Foxp3 293	chr5	122581510	122581820	shared	Ccdc63	192	TRUE
Foxp3 4758	chr5	122593838	122594081	WT_specific	Ccdc63	-5115	TRUE
Foxp3 294	chr5	122595403	122596838	shared	Ccdc63	-7872	TRUE
Foxp3 4749	chr5	116162166	116162743	WT_specific	Ccdc64	3825	TRUE
Foxp3 4750	chr5	116162924	116163602	WT_specific	Ccdc64	2966	TRUE
Foxp3 4751	chr5	116164648	116165057	WT_specific	Ccdc64	1511	FALSE
Foxp3 4752	chr5	116165666	116166386	WT_specific	Ccdc64	182	TRUE
Foxp3 4753	chr5	116166489	116167940	WT_specific	Ccdc64	-1372	TRUE
Foxp3 5266	chr7	97413758	97414684	WT_specific	Ccdc83	-742	TRUE
Foxp3 4345	chr4	43983768	43984000	WT_specific	Ccin	12376	FALSE
Foxp3 4346	chr4	43986639	43986907	WT_specific	Ccin	9469	TRUE
Foxp3 1908	chr11	81991500	81991884	WT_specific	Ccl1	1430	TRUE
Foxp3 6271	chr8	97326423	97326953	IKcKO_specific	Ccl17	7400	TRUE
Foxp3 5460	chr8	97337083	97337500	WT_specific	Ccl17	-3147	TRUE
Foxp3 1924	chr11	83364253	83364908	WT_specific	Ccl5	-20888	TRUE
Foxp3 1668	chr11	6460570	6461910	WT_specific	Ccm2	-773	TRUE
Foxp3 1669	chr11	6472905	6473615	WT_specific	Ccm2	-3966	FALSE
Foxp3 3245	chr17	47644954	47645506	WT_specific	Ccnd3	-3506	TRUE
Foxp3 876	chr17	47671414	47671765	shared	Ccnd3	-29765	FALSE
Foxp3 3246	chr17	47648358	47649141	WT_specific	Ccnd3	-7141	TRUE
Foxp3 3247	chr17	47664546	47664918	WT_specific	Ccnd3	-22918	TRUE
Foxp3 875	chr17	47668146	47669535	shared	Ccnd3	-27535	TRUE
Foxp3 3248	chr17	47670213	47671184	WT_specific	Ccnd3	-29184	TRUE
Foxp3 3249	chr17	47672669	47673021	WT_specific	Ccnd3	-31021	TRUE
Foxp3 6065	chr17	47701359	47701636	IKcKO_specific	Ccnd3	28780	TRUE
Foxp3 4051	chr3	65733982	65734544	WT_specific	Ccnl1	17376	TRUE
Foxp3 513	chr9	123982463	123982854	shared	Ccr2	33835	TRUE
Foxp3 5790	chr9	114363884	114364262	WT_specific	Ccr4	40894	FALSE
Foxp3 5791	chr9	114405779	114406103	WT_specific	Ccr4	-441	TRUE
Foxp3 5792	chr9	114407583	114407825	WT_specific	Ccr4	-2163	TRUE
Foxp3 5793	chr9	114416560	114416884	WT_specific	Ccr4	-11222	TRUE
Foxp3 6058	chr17	8438391	8438590	IKcKO_specific	Ccr6	-645	FALSE
Foxp3 1998	chr11	98992087	98992416	WT_specific	Ccr7	23975	TRUE
Foxp3 1999	chr11	98992535	98992932	WT_specific	Ccr7	23459	TRUE
Foxp3 2000	chr11	99011549	99012374	WT_specific	Ccr7	4017	TRUE
Foxp3 652	chr11	99015223	99016912	shared	Ccr7	-521	TRUE
Foxp3 2001	chr11	99024026	99024787	WT_specific	Ccr7	-8396	TRUE
Foxp3 5955	chr11	99024904	99025590	IKcKO_specific	Ccr7	-9199	TRUE
Foxp3 2002	chr11	99028716	99030198	WT_specific	Ccr7	-13807	TRUE
Foxp3 2003	chr11	99030751	99030973	WT_specific	Ccr7	-14582	FALSE
Foxp3 2004	chr11	99031455	99031770	WT_specific	Ccr7	-15379	FALSE
Foxp3 653	chr11	99031839	99032377	shared	Ccr7	-15986	TRUE
Foxp3 5956	chr11	99032433	99032805	IKcKO_specific	Ccr7	-16414	TRUE
Foxp3 2005	chr11	99041014	99041477	WT_specific	Ccr7	-25086	TRUE
Foxp3 2006	chr11	99041726	99042284	WT_specific	Ccr7	-25893	TRUE
Foxp3 509	chr9	119999765	120001321	shared	Ccr8	-70	TRUE
Foxp3 5813	chr9	120005002	120005301	WT_specific	Ccr8	-4050	TRUE
Foxp3 5812	chr9	119989607	119990327	WT_specific	Ccr8	10924	FALSE
Foxp3 510	chr9	120007989	120008489	shared	Ccr8	-7238	TRUE
Foxp3 1589	chr10	116542069	116542564	WT_specific	Cct2	-41694	TRUE
Foxp3 4089	chr3	88102068	88102307	WT_specific	Cct3	-1197	FALSE
Foxp3 4158	chr3	100814072	100814682	WT_specific	Cd101	11417	TRUE
Foxp3 4159	chr3	100815838	100816600	WT_specific	Cd101	9499	TRUE
Foxp3 4160	chr3	100825554	100825818	WT_specific	Cd101	281	TRUE
Foxp3 4161	chr3	100852481	100853125	WT_specific	Cd101	-19646	FALSE
Foxp3 6152	chr3	96616659	96616959	IKcKO_specific	Cd160	1485	TRUE
Foxp3 181	chr3	101086032	101087172	shared	Cd2	-2860	FALSE
Foxp3 4168	chr3	101078418	101079563	WT_specific	Cd2	4749	TRUE
Foxp3 4167	chr3	101077924	101078269	WT_specific	Cd2	6043	FALSE
Foxp3 4171	chr3	101083104	101084378	WT_specific	Cd2	-66	TRUE
Foxp3 4169	chr3	101081598	101082028	WT_specific	Cd2	2284	FALSE
Foxp3 4170	chr3	101082501	101082986	WT_specific	Cd2	1326	FALSE
Foxp3 4172	chr3	101084440	101085395	WT_specific	Cd2	-1083	TRUE
Foxp3 4173	chr3	101087472	101088552	WT_specific	Cd2	-4240	TRUE
Foxp3 182	chr3	101089716	101092658	shared	Cd2	-856	TRUE
Foxp3 4174	chr3	101093445	101093794	WT_specific	Cd2	-1932	FALSE
Foxp3 4175	chr3	101094519	101094985	WT_specific	Cd2	-3123	TRUE
Foxp3 4176	chr3	101095077	101095345	WT_specific	Cd2	-3483	FALSE
Foxp3 4177	chr3	101099404	101099659	WT_specific	Cd2	-7797	TRUE
Foxp3 4178	chr3	101100139	101100541	WT_specific	Cd2	-8679	TRUE
Foxp3 3025	chr16	45402676	45403013	WT_specific	Cd200	-2588	FALSE
Foxp3 3022	chr16	44765813	44766254	WT_specific	Cd200r1	-315	TRUE
Foxp3 3023	chr16	44772657	44772928	WT_specific	Cd200r1	-6989	TRUE
Foxp3 3024	chr16	45025506	45025744	WT_specific	Cd200r3	-60377	TRUE
Foxp3 3456	chr18	89328349	89328730	WT_specific	Cd226	38093	TRUE
Foxp3 1268	chr1	173494327	173494845	WT_specific	Cd244	-5389	TRUE
Foxp3 1269	chr1	173496443	173497124	WT_specific	Cd244	-7668	TRUE
Foxp3 57	chr1	167718896	167721067	shared	Cd247	-2171	TRUE
Foxp3 1251	chr1	167721542	167721860	WT_specific	Cd247	-2964	FALSE
Foxp3 1252	chr1	167723808	167724678	WT_specific	Cd247	-5782	FALSE
Foxp3 1253	chr1	167728231	167728645	WT_specific	Cd247	-9749	FALSE
Foxp3 1255	chr1	167767559	167767991	WT_specific	Cd247	20356	TRUE
Foxp3 1256	chr1	167778668	167778903	WT_specific	Cd247	9444	FALSE
Foxp3 5059	chr6	125186427	125187720	WT_specific	Cd27	-699	TRUE
Foxp3 5060	chr6	125187799	125189833	WT_specific	Cd27	-2805	TRUE
Foxp3 5061	chr6	125191411	125192055	WT_specific	Cd27	-5027	TRUE
Foxp3 3526	chr19	29441854	29442287	WT_specific	Cd274	-342	TRUE
Foxp3 11	chr1	60802886	60803414	shared	Cd28	-168	TRUE
Foxp3 1030	chr1	60802356	60802631	WT_specific	Cd28	571	FALSE
Foxp3 1031	chr1	60816351	60816683	WT_specific	Cd28	-13437	FALSE
Foxp3 5861	chr1	60806799	60807255	IKcKO_specific	Cd28	-4009	TRUE
Foxp3 5862	chr1	60812264	60812545	IKcKO_specific	Cd28	-9299	TRUE
Foxp3 2105	chr11	114826559	114826957	WT_specific	Cd300c	3514	FALSE
Foxp3 5641	chr9	44789871	44790280	WT_specific	Cd3d	-404	TRUE
Foxp3 475	chr9	44792859	44795384	shared	Cd3d	-5508	TRUE
Foxp3 5642	chr9	44790547	44791034	WT_specific	Cd3d	-1158	FALSE
Foxp3 476	chr9	44816316	44818161	shared	Cd3e	-488	TRUE
Foxp3 5643	chr9	44832170	44832635	WT_specific	Cd3e	-14962	FALSE
Foxp3 5640	chr9	44788086	44788762	WT_specific	Cd3g	-248	TRUE
Foxp3 359	chr6	124834932	124835889	shared	Cd4	2328	TRUE
Foxp3 5055	chr6	124833308	124833857	WT_specific	Cd4	-4146	FALSE
Foxp3 5056	chr6	124841098	124841363	WT_specific	Cd4	-3124	FALSE
Foxp3 6229	chr6	124848274	124848550	IKcKO_specific	Cd4	-10311	TRUE
Foxp3 3814	chr2	102740988	102741585	WT_specific	Cd44	-82	TRUE
Foxp3 841	chr16	49839700	49840634	shared	Cd47	15097	TRUE
Foxp3 3036	chr16	49936774	49937168	WT_specific	Cd47	-23862	TRUE
Foxp3 3037	chr16	49937429	49937939	WT_specific	Cd47	-24633	TRUE
Foxp3 6050	chr16	49938159	49938502	IKcKO_specific	Cd47	-25196	TRUE
Foxp3 842	chr16	49969900	49970761	shared	Cd47	-57455	TRUE
Foxp3 3489	chr19	10812586	10813338	WT_specific	Cd5	126	TRUE
Foxp3 3490	chr19	10813516	10813880	WT_specific	Cd5	-416	TRUE
Foxp3 4496	chr4	133649802	133650282	WT_specific	Cd52	671	FALSE
Foxp3 4497	chr4	133650427	133651894	WT_specific	Cd52	-941	TRUE
Foxp3 4498	chr4	133652532	133653637	WT_specific	Cd52	-2640	TRUE
Foxp3 4499	chr4	133653720	133655380	WT_specific	Cd52	-4383	TRUE
Foxp3 910	chr19	10852373	10852900	shared	Cd6	14578	FALSE
Foxp3 911	chr19	10856747	10858608	shared	Cd6	8870	TRUE
Foxp3 3494	chr19	10843720	10844122	WT_specific	Cd6	23356	FALSE
Foxp3 3495	chr19	10858707	10859220	WT_specific	Cd6	8258	TRUE
Foxp3 3496	chr19	10861917	10862511	WT_specific	Cd6	4967	TRUE
Foxp3 3497	chr19	10899808	10900414	WT_specific	Cd6	3932	FALSE
Foxp3 6086	chr19	10892867	10893803	IKcKO_specific	Cd6	10543	TRUE
Foxp3 3498	chr19	10901932	10902761	WT_specific	Cd6	1585	TRUE
Foxp3 6087	chr19	10898249	10898895	IKcKO_specific	Cd6	5451	FALSE
Foxp3 5091	chr6	129229890	129230195	WT_specific	Cd69	-4808	FALSE
Foxp3 3812	chr2	93298842	93299827	WT_specific	Cd82	2242	TRUE
Foxp3 2407	chr13	43845922	43846304	WT_specific	Cd83	34172	TRUE
Foxp3 725	chr13	43869249	43870005	shared	Cd83	10471	TRUE
Foxp3 2408	chr13	43856114	43856455	WT_specific	Cd83	24021	FALSE
Foxp3 2409	chr13	43864804	43865153	WT_specific	Cd83	15323	FALSE
Foxp3 2410	chr13	43899868	43900300	WT_specific	Cd83	-19746	FALSE
Foxp3 5988	chr13	43870157	43870750	IKcKO_specific	Cd83	9726	TRUE
Foxp3 1271	chr1	173775245	173775746	WT_specific	Cd84	-4982	TRUE
Foxp3 1272	chr1	173779695	173779982	WT_specific	Cd84	-9218	FALSE
Foxp3 3006	chr16	36633516	36633756	WT_specific	Cd86	9135	FALSE
Foxp3 3007	chr16	36667160	36667875	WT_specific	Cd86	-1708	TRUE
Foxp3 5065	chr6	125432038	125432338	WT_specific	Cd9	-4018	FALSE
Foxp3 6230	chr6	125432587	125432945	IKcKO_specific	Cd9	-4625	TRUE
Foxp3 5066	chr6	125434076	125434580	WT_specific	Cd9	-6260	TRUE
Foxp3 839	chr16	46119831	46120416	shared	Cd96	-52	TRUE
Foxp3 4218	chr3	116112898	116113359	WT_specific	Cdc14a	12583	FALSE
Foxp3 4526	chr4	136923296	136924400	WT_specific	Cdc42	-10765	TRUE
Foxp3 1806	chr11	54577525	54578038	WT_specific	Cdc42se2	-4197	TRUE
Foxp3 623	chr11	54588280	54588754	shared	Cdc42se2	12373	TRUE
Foxp3 624	chr11	54615262	54616038	shared	Cdc42se2	-14861	TRUE
Foxp3 1807	chr11	54582999	54583226	WT_specific	Cdc42se2	-9385	FALSE
Foxp3 2963	chr16	18811329	18811717	WT_specific	Cdc45	2	TRUE
Foxp3 5883	chr1	145480343	145480568	IKcKO_specific	Cdc73	7143	FALSE
Foxp3 1976	chr11	98128190	98128513	WT_specific	Cdk12	-3697	FALSE
Foxp3 555	chr10	92586708	92587370	shared	Cdk17	36251	TRUE
Foxp3 1524	chr10	92607923	92608177	WT_specific	Cdk17	15444	TRUE
Foxp3 1528	chr10	92653391	92654183	WT_specific	Cdk17	16862	TRUE
Foxp3 4602	chr5	3355228	3355824	WT_specific	Cdk6	-11512	TRUE
Foxp3 3320	chr17	80963730	80964005	WT_specific	Cdkl4	-831	TRUE
Foxp3 5098	chr6	134871647	134872215	WT_specific	Cdkn1b	-1796	TRUE
Foxp3 6235	chr6	134897358	134897931	IKcKO_specific	Cdkn1b	-27512	TRUE
Foxp3 3868	chr2	132095078	132095446	WT_specific	Cds2	-6469	TRUE
Foxp3 3869	chr2	132108287	132108815	WT_specific	Cds2	2097	TRUE
Foxp3 5489	chr8	125084956	125085778	WT_specific	Cdt1	6137	TRUE
Foxp3 2394	chr13	35899865	35900137	WT_specific	Cdyl	6480	TRUE
Foxp3 6275	chr8	119162240	119162493	IKcKO_specific	Cdyl2	94398	TRUE
Foxp3 3952	chr2	167501015	167501281	WT_specific	Cebpb	13134	FALSE
Foxp3 3953	chr2	167503798	167504129	WT_specific	Cebpb	10286	FALSE
Foxp3 3954	chr2	167505892	167506217	WT_specific	Cebpb	8198	TRUE
Foxp3 2935	chr15	100513275	100513742	WT_specific	Cela1	4609	TRUE
Foxp3 3628	chr2	6643113	6643483	WT_specific	Celf2	-221	TRUE
Foxp3 2909	chr15	85838077	85838537	WT_specific	Celsr1	25670	TRUE
Foxp3 188	chr3	108192023	108192497	shared	Celsr2	2380	TRUE
Foxp3 4685	chr5	86495451	86496142	WT_specific	Cenpc1	-1534	TRUE
Foxp3 1227	chr1	163000470	163001392	WT_specific	Cenpl	-369	TRUE
Foxp3 1228	chr1	163002944	163003198	WT_specific	Cenpl	-2175	FALSE
Foxp3 105	chr2	34987529	34988152	shared	Cep110	-374	TRUE
Foxp3 3893	chr2	155804836	155805576	WT_specific	Cep250	-282	TRUE
Foxp3 3052	chr16	55926661	55927360	WT_specific	Cep97	6986	FALSE
Foxp3 3053	chr16	55946421	55946749	WT_specific	Cep97	-11781	FALSE
Foxp3 5474	chr8	114345210	114345632	WT_specific	Cfdp1	32578	TRUE
Foxp3 1020	chr1	58775403	58775733	WT_specific	Cflar	-5572	FALSE
Foxp3 1021	chr1	58776670	58777537	WT_specific	Cflar	-7376	TRUE
Foxp3 1022	chr1	58778351	58778652	WT_specific	Cflar	-8491	TRUE
Foxp3 1023	chr1	58783464	58783862	WT_specific	Cflar	3534	TRUE
Foxp3 1024	chr1	58798952	58799274	WT_specific	Cflar	-11878	TRUE
Foxp3 1025	chr1	58799517	58800238	WT_specific	Cflar	-12842	TRUE
Foxp3 5857	chr1	58775912	58776233	IKcKO_specific	Cflar	-6072	FALSE
Foxp3 3061	chr16	64873288	64874017	WT_specific	Cggbp1	-21489	TRUE
Foxp3 5211	chr7	80676940	80677202	WT_specific	Chd2	5305	TRUE
Foxp3 5212	chr7	80686349	80686640	WT_specific	Chd2	-8	TRUE
Foxp3 5210	chr7	80643748	80644067	WT_specific	Chd2	20407	FALSE
Foxp3 5214	chr7	80728331	80728700	WT_specific	Chd2	-42068	TRUE
Foxp3 383	chr7	80729286	80730047	shared	Chd2	-43415	TRUE
Foxp3 5213	chr7	80694940	80695359	WT_specific	Chd2	-8727	FALSE
Foxp3 5215	chr7	80733115	80733544	WT_specific	Chd2	-46912	TRUE
Foxp3 384	chr7	80733724	80734695	shared	Chd2	-48063	TRUE
Foxp3 6246	chr7	80730457	80730779	IKcKO_specific	Chd2	-44147	FALSE
Foxp3 4294	chr4	8726172	8726969	WT_specific	Chd7	40500	TRUE
Foxp3 204	chr4	8738189	8738567	shared	Chd7	28902	TRUE
Foxp3 4295	chr4	8728464	8728821	WT_specific	Chd7	38648	FALSE
Foxp3 4296	chr4	8755321	8755826	WT_specific	Chd7	11643	FALSE
Foxp3 4297	chr4	8765705	8765997	WT_specific	Chd7	1472	TRUE
Foxp3 4298	chr4	8799247	8799585	WT_specific	Chd7	-32116	TRUE
Foxp3 436	chr8	93318957	93319876	shared	Chd9	32858	TRUE
Foxp3 5448	chr8	93478964	93479494	WT_specific	Chd9	-160	TRUE
Foxp3 3820	chr2	112321678	112322164	WT_specific	Chrm5	-1190	TRUE
Foxp3 4661	chr5	66292998	66294557	WT_specific	Chrna9	31603	TRUE
Foxp3 4663	chr5	66309427	66309936	WT_specific	Chrna9	16224	TRUE
Foxp3 4662	chr5	66304667	66305036	WT_specific	Chrna9	21124	FALSE
Foxp3 4664	chr5	66312456	66313746	WT_specific	Chrna9	12414	TRUE
Foxp3 4665	chr5	66320331	66320899	WT_specific	Chrna9	5261	TRUE
Foxp3 4666	chr5	66341597	66342618	WT_specific	Chrna9	-16404	TRUE
Foxp3 4667	chr5	66346019	66346875	WT_specific	Chrna9	11488	TRUE
Foxp3 277	chr5	66347105	66347480	shared	Chrna9	10883	TRUE
Foxp3 498	chr9	95179213	95180418	shared	Chst2	127271	TRUE
Foxp3 5461	chr8	97352054	97352482	WT_specific	Ciapin1	-1868	TRUE
Foxp3 5166	chr7	26052438	26052859	WT_specific	Cic	-136	TRUE
Foxp3 5771	chr9	107198545	107198811	WT_specific	Cish	-454	TRUE
Foxp3 503	chr9	107200657	107201834	shared	Cish	-348	TRUE
Foxp3 1365	chr10	17441978	17442336	WT_specific	Cited2	698	TRUE
Foxp3 2962	chr16	18733183	18733925	WT_specific	Cldn5	43015	TRUE
Foxp3 6039	chr16	10565645	10565979	IKcKO_specific	Clec16a	-20477	TRUE
Foxp3 2949	chr16	10585133	10585527	WT_specific	Clec16a	15117	TRUE
Foxp3 2950	chr16	10640059	10640339	WT_specific	Clec16a	-10186	TRUE
Foxp3 2951	chr16	10655677	10656336	WT_specific	Clec16a	-26183	TRUE
Foxp3 363	chr6	129130599	129131423	shared	Clec2d	-790	TRUE
Foxp3 5084	chr6	129129865	129130288	WT_specific	Clec2d	345	FALSE
Foxp3 5085	chr6	129132593	129132890	WT_specific	Clec2d	-2257	FALSE
Foxp3 5086	chr6	129133912	129134599	WT_specific	Clec2d	-3966	FALSE
Foxp3 362	chr6	128837101	128838185	shared	Clec2i	-569	TRUE
Foxp3 5083	chr6	128838390	128838753	WT_specific	Clec2i	-1137	TRUE
Foxp3 3236	chr17	44398854	44399202	WT_specific	Clic5	-73681	TRUE
Foxp3 5288	chr7	108873360	108873811	WT_specific	Clpb	38282	TRUE
Foxp3 4347	chr4	44034165	44034547	WT_specific	Clta	-8989	FALSE
Foxp3 5984	chr13	24507214	24507687	IKcKO_specific	Cmah	-695	TRUE
Foxp3 718	chr13	24508111	24509056	shared	Cmah	-286	TRUE
Foxp3 5122	chr6	142728828	142729143	WT_specific	Cmas	-10657	TRUE
Foxp3 5794	chr9	114651486	114651963	WT_specific	Cmtm6	-11642	TRUE
Foxp3 508	chr9	114696758	114697652	shared	Cmtm7	-6689	TRUE
Foxp3 2475	chr13	93864884	93865633	WT_specific	Cmya5	49046	TRUE
Foxp3 4671	chr5	73025946	73026584	WT_specific	Cnga1	2497	TRUE
Foxp3 278	chr5	73027174	73027626	shared	Cnga1	1455	TRUE
Foxp3 1310	chr1	183228379	183229232	WT_specific	Cnih3	53527	TRUE
Foxp3 1311	chr1	183264661	183265044	WT_specific	Cnih3	17715	TRUE
Foxp3 1333	chr10	3012697	3012940	WT_specific	Cnksr3	121364	TRUE
Foxp3 1334	chr10	3227535	3228093	WT_specific	Cnksr3	-17058	TRUE
Foxp3 4692	chr5	96593028	96593269	WT_specific	Cnot6l	-79	TRUE
Foxp3 4887	chr6	47265045	47265383	WT_specific	Cntnap2	-70982	FALSE
Foxp3 116	chr2	65027454	65027919	shared	Cobll1	46133	TRUE
Foxp3 4037	chr3	52681877	52682572	WT_specific	Cog6	138566	TRUE
Foxp3 4036	chr3	52681329	52681571	WT_specific	Cog6	139567	FALSE
Foxp3 167	chr3	52733825	52734480	shared	Cog6	86658	TRUE
Foxp3 4038	chr3	52732765	52733206	WT_specific	Cog6	87932	FALSE
Foxp3 4039	chr3	52805726	52806007	WT_specific	Cog6	15131	FALSE
Foxp3 4359	chr4	47264228	47264956	WT_specific	Col15a1	6451	TRUE
Foxp3 4360	chr4	47285285	47286444	WT_specific	Col15a1	-14716	TRUE
Foxp3 4361	chr4	47287411	47287700	WT_specific	Col15a1	13229	TRUE
Foxp3 4362	chr4	47311652	47311940	WT_specific	Col15a1	4654	FALSE
Foxp3 4363	chr4	47314986	47315399	WT_specific	Col15a1	1195	FALSE
Foxp3 4364	chr4	47315586	47316413	WT_specific	Col15a1	181	TRUE
Foxp3 4365	chr4	47332849	47333361	WT_specific	Col15a1	-16767	TRUE
Foxp3 5669	chr9	57018866	57019076	WT_specific	Commd4	-12970	FALSE
Foxp3 4669	chr5	72574749	72575186	WT_specific	Commd8	-15764	FALSE
Foxp3 6260	chr7	121335693	121335915	IKcKO_specific	Copb1	62279	FALSE
Foxp3 4701	chr5	101051905	101052264	WT_specific	Coq2	41174	TRUE
Foxp3 282	chr5	101065698	101066488	shared	Coq2	26950	TRUE
Foxp3 4704	chr5	101071425	101071984	WT_specific	Coq2	21454	TRUE
Foxp3 4702	chr5	101053011	101053679	WT_specific	Coq2	39759	FALSE
Foxp3 4703	chr5	101065158	101065427	WT_specific	Coq2	28011	FALSE
Foxp3 283	chr5	101072139	101073326	shared	Coq2	20112	TRUE
Foxp3 5335	chr7	133851244	133851727	WT_specific	Coro1a	-426	TRUE
Foxp3 4350	chr4	46565180	46565551	WT_specific	Coro2a	-9877	FALSE
Foxp3 4351	chr4	46567237	46567727	WT_specific	Coro2a	-12053	FALSE
Foxp3 4352	chr4	46569747	46570214	WT_specific	Coro2a	9098	TRUE
Foxp3 4353	chr4	46573019	46573612	WT_specific	Coro2a	5700	TRUE
Foxp3 4354	chr4	46581179	46581873	WT_specific	Coro2a	-2543	TRUE
Foxp3 4355	chr4	46584200	46584429	WT_specific	Coro2a	-5099	TRUE
Foxp3 4356	chr4	46597854	46598288	WT_specific	Coro2a	16475	TRUE
Foxp3 4357	chr4	46599477	46599817	WT_specific	Coro2a	14946	FALSE
Foxp3 4358	chr4	46604806	46605791	WT_specific	Coro2a	8972	TRUE
Foxp3 2946	chr16	4673726	4674066	WT_specific	Coro7	5612	TRUE
Foxp3 5484	chr8	122337157	122337641	WT_specific	Cotl1	26781	TRUE
Foxp3 1590	chr10	116803564	116803942	WT_specific	Cpsf6	-3653	FALSE
Foxp3 1591	chr10	116854537	116854846	WT_specific	Cpsf6	-37775	TRUE
Foxp3 1332	chr1	196957303	196957719	WT_specific	Cr1l	-220	TRUE
Foxp3 867	chr17	35394835	35395541	shared	CR974466.1	-4557	TRUE
Foxp3 558	chr10	94776187	94776482	shared	Cradd	9839	TRUE
Foxp3 5015	chr6	106738301	106738665	WT_specific	Crbn	10362	FALSE
Foxp3 5016	chr6	106743642	106744114	WT_specific	Crbn	4913	TRUE
Foxp3 5096	chr6	134788590	134789381	WT_specific	Crebl2	-9108	TRUE
Foxp3 1899	chr11	79879539	79880047	WT_specific	Crlf3	-8646	FALSE
Foxp3 1900	chr11	79881243	79881517	WT_specific	Crlf3	-10116	TRUE
Foxp3 1901	chr11	79882494	79882744	WT_specific	Crlf3	-11343	FALSE
Foxp3 1902	chr11	79885283	79885565	WT_specific	Crlf3	8873	FALSE
Foxp3 5245	chr7	87727646	87727963	WT_specific	Crtc3	16059	TRUE
Foxp3 5246	chr7	87728706	87729094	WT_specific	Crtc3	14928	TRUE
Foxp3 3188	chr17	31829693	31830782	WT_specific	Cryaa	-15904	TRUE
Foxp3 3059	chr16	59521735	59522116	WT_specific	Crybg3	3324	TRUE
Foxp3 5671	chr9	57500605	57501127	WT_specific	Csk	-7667	TRUE
Foxp3 3419	chr18	61758701	61758910	WT_specific	Csnk1a1	-16412	FALSE
Foxp3 3406	chr18	54063154	54063418	WT_specific	Csnk1g3	-41651	TRUE
Foxp3 5809	chr9	119890788	119891187	WT_specific	Csrnp1	-4819	TRUE
Foxp3 1164	chr1	137616267	137617035	WT_specific	Csrp1	-397	TRUE
Foxp3 2274	chr12	81374017	81374686	WT_specific	CT030161.1	61	TRUE
Foxp3 2275	chr12	81375208	81375633	WT_specific	CT030161.1	-886	FALSE
Foxp3 5524	chr9	7778666	7779238	WT_specific	CT030639.1	5152	FALSE
Foxp3 1032	chr1	60909773	60911171	WT_specific	Ctla4	32673	TRUE
Foxp3 1033	chr1	60919777	60920349	WT_specific	Ctla4	23495	TRUE
Foxp3 12	chr1	60965871	60966367	shared	Ctla4	-352	TRUE
Foxp3 1034	chr1	60927462	60927777	WT_specific	Ctla4	16067	FALSE
Foxp3 5865	chr1	60968162	60968665	IKcKO_specific	Ctla4	-2650	TRUE
Foxp3 1035	chr1	60968998	60969659	WT_specific	Ctla4	-3644	TRUE
Foxp3 5864	chr1	60912732	60913301	IKcKO_specific	Ctla4	30543	FALSE
Foxp3 1036	chr1	60973414	60973699	WT_specific	Ctla4	-7684	TRUE
Foxp3 1458	chr10	62891391	62891797	WT_specific	Ctnna3	1049	TRUE
Foxp3 1160	chr1	133534585	133535086	WT_specific	Ctse	-15	TRUE
Foxp3 4130	chr3	95315681	95316047	WT_specific	Ctsk	-12839	TRUE
Foxp3 4131	chr3	95321599	95322125	WT_specific	Ctss	8583	TRUE
Foxp3 3652	chr2	13331627	13332046	WT_specific	Cubn	45205	TRUE
Foxp3 3653	chr2	13332277	13332633	WT_specific	Cubn	44618	TRUE
Foxp3 88	chr2	13335253	13336037	shared	Cubn	41214	TRUE
Foxp3 5950	chr11	87920442	87920923	IKcKO_specific	Cuedc1	-8131	TRUE
Foxp3 645	chr11	87958178	87959183	shared	Cuedc1	16580	TRUE
Foxp3 5868	chr1	80357756	80358164	IKcKO_specific	Cul3	-21109	FALSE
Foxp3 5954	chr11	97627976	97628312	IKcKO_specific	Cwc25	-442	TRUE
Foxp3 3556	chr19	44209811	44210377	WT_specific	Cwf19l1	-11	TRUE
Foxp3 5810	chr9	119963736	119964207	WT_specific	Cx3cr1	13193	TRUE
Foxp3 5811	chr9	119985597	119986165	WT_specific	Cx3cr1	-8765	FALSE
Foxp3 5876	chr1	130466642	130467176	IKcKO_specific	Cxcr4	21691	TRUE
Foxp3 31	chr1	130508393	130508766	shared	Cxcr4	-19896	TRUE
Foxp3 1140	chr1	130529541	130529965	WT_specific	Cxcr4	-41095	FALSE
Foxp3 1139	chr1	130510976	130511550	WT_specific	Cxcr4	-22680	TRUE
Foxp3 5877	chr1	130512423	130512780	IKcKO_specific	Cxcr4	-23910	FALSE
Foxp3 471	chr9	44323429	44324427	shared	Cxcr5	10077	TRUE
Foxp3 472	chr9	44340611	44340936	shared	Cxcr5	-6432	FALSE
Foxp3 6289	chr9	44325228	44325713	IKcKO_specific	Cxcr5	8791	TRUE
Foxp3 5626	chr9	44326876	44327693	WT_specific	Cxcr5	6811	FALSE
Foxp3 5627	chr9	44330228	44330681	WT_specific	Cxcr5	3823	FALSE
Foxp3 5625	chr9	44326057	44326698	WT_specific	Cxcr5	7806	TRUE
Foxp3 5628	chr9	44334395	44335166	WT_specific	Cxcr5	-662	TRUE
Foxp3 5630	chr9	44341892	44342305	WT_specific	Cxcr5	-7801	FALSE
Foxp3 5629	chr9	44341098	44341816	WT_specific	Cxcr5	-7312	TRUE
Foxp3 5632	chr9	44368804	44369128	WT_specific	Cxcr5	-34624	FALSE
Foxp3 5631	chr9	44345485	44346326	WT_specific	Cxcr5	-11822	TRUE
Foxp3 5831	chr9	123723899	123724257	WT_specific	Cxcr6	-8662	TRUE
Foxp3 3455	chr18	85042939	85044393	WT_specific	Cyb5	2600	TRUE
Foxp3 1749	chr11	46088762	46089611	WT_specific	Cyfip2	-5440	TRUE
Foxp3 1750	chr11	46118319	46119579	WT_specific	Cyfip2	6143	TRUE
Foxp3 611	chr11	46140035	46141094	shared	Cyfip2	-15242	TRUE
Foxp3 5447	chr8	91215621	91216143	WT_specific	Cyld	4784	TRUE
Foxp3 6091	chr19	37903153	37903351	IKcKO_specific	Cyp26a1	-131053	FALSE
Foxp3 3192	chr17	33083966	33084923	WT_specific	Cyp4f13	-587	TRUE
Foxp3 2663	chr14	73448816	73449410	WT_specific	Cysltr2	-489	TRUE
Foxp3 671	chr11	118082206	118083073	shared	Cyth1	-2734	FALSE
Foxp3 2141	chr11	118073157	118073570	WT_specific	Cyth1	486	TRUE
Foxp3 2142	chr11	118083735	118084291	WT_specific	Cyth1	-3952	TRUE
Foxp3 2143	chr11	118084489	118085325	WT_specific	Cyth1	2968	TRUE
Foxp3 672	chr11	118086765	118087703	shared	Cyth1	590	TRUE
Foxp3 673	chr11	118087804	118088870	shared	Cyth1	-577	TRUE
Foxp3 2144	chr11	118089019	118089986	WT_specific	Cyth1	-1693	TRUE
Foxp3 2145	chr11	118093501	118093898	WT_specific	Cyth1	-5605	TRUE
Foxp3 674	chr11	118093953	118094327	shared	Cyth1	-6034	TRUE
Foxp3 2146	chr11	118095956	118096553	WT_specific	Cyth1	-8260	FALSE
Foxp3 2147	chr11	118097798	118098925	WT_specific	Cyth1	-10632	TRUE
Foxp3 2148	chr11	118100005	118100318	WT_specific	Cyth1	9498	FALSE
Foxp3 2149	chr11	118100564	118102610	WT_specific	Cyth1	7206	TRUE
Foxp3 2869	chr15	78417919	78418897	WT_specific	Cyth4	8580	TRUE
Foxp3 2870	chr15	78445238	78445549	WT_specific	Cyth4	-18072	TRUE
Foxp3 3734	chr2	57989983	57990457	WT_specific	Cytip	18751	TRUE
Foxp3 112	chr2	58007375	58007938	shared	Cytip	1270	TRUE
Foxp3 3737	chr2	58008034	58008412	WT_specific	Cytip	796	TRUE
Foxp3 113	chr2	58008981	58009366	shared	Cytip	-158	TRUE
Foxp3 3735	chr2	57990859	57991423	WT_specific	Cytip	17785	FALSE
Foxp3 3736	chr2	57992993	57993284	WT_specific	Cytip	15924	FALSE
Foxp3 3738	chr2	58009506	58009752	WT_specific	Cytip	-544	TRUE
Foxp3 114	chr2	58012156	58012643	shared	Cytip	-113	TRUE
Foxp3 3739	chr2	58011617	58011835	WT_specific	Cytip	695	FALSE
Foxp3 2586	chr14	28218176	28219130	WT_specific	D14Abb1e	22903	TRUE
Foxp3 3071	chr16	78531838	78532211	WT_specific	D16Ertd472e	44691	TRUE
Foxp3 845	chr16	78539988	78541014	shared	D16Ertd472e	35888	TRUE
Foxp3 3072	chr16	78541146	78541464	WT_specific	D16Ertd472e	35438	TRUE
Foxp3 3073	chr16	78547717	78548109	WT_specific	D16Ertd472e	28793	TRUE
Foxp3 3074	chr16	78560284	78560693	WT_specific	D16Ertd472e	16209	TRUE
Foxp3 6053	chr16	78563294	78563723	IKcKO_specific	D16Ertd472e	13179	TRUE
Foxp3 3075	chr16	78562393	78562974	WT_specific	D16Ertd472e	13928	FALSE
Foxp3 846	chr16	78563884	78564909	shared	D16Ertd472e	11993	TRUE
Foxp3 866	chr17	35136685	35137287	shared	D17H6S56E-5	404	TRUE
Foxp3 860	chr17	27962222	27963055	shared	D17Wsu92e	-5552	TRUE
Foxp3 861	chr17	27963387	27964222	shared	D17Wsu92e	-6719	TRUE
Foxp3 3429	chr18	68169461	68169866	WT_specific	D18Ertd653e	-76955	TRUE
Foxp3 3431	chr18	68211412	68212155	WT_specific	D18Ertd653e	-119244	TRUE
Foxp3 3430	chr18	68210599	68210892	WT_specific	D18Ertd653e	-117981	FALSE
Foxp3 3432	chr18	68212521	68213587	WT_specific	D18Ertd653e	-120676	TRUE
Foxp3 3433	chr18	68218646	68219092	WT_specific	D18Ertd653e	-126181	TRUE
Foxp3 3434	chr18	68349365	68349849	WT_specific	D18Ertd653e	37799	TRUE
Foxp3 3435	chr18	68377878	68378228	WT_specific	D18Ertd653e	9420	TRUE
Foxp3 3436	chr18	68386095	68386511	WT_specific	D18Ertd653e	1137	TRUE
Foxp3 900	chr18	68386804	68388184	shared	D18Ertd653e	-536	TRUE
Foxp3 3564	chr19	46694732	46695675	WT_specific	D19Wsu162e	2216	TRUE
Foxp3 1117	chr1	108466017	108467192	WT_specific	D630008O14Rik	-28672	TRUE
Foxp3 1119	chr1	108497942	108498220	WT_specific	D630008O14Rik	-59700	TRUE
Foxp3 1116	chr1	108421022	108421397	WT_specific	D630008O14Rik	17123	FALSE
Foxp3 26	chr1	108508357	108509317	shared	D630008O14Rik	-70797	TRUE
Foxp3 1118	chr1	108495990	108496297	WT_specific	D630008O14Rik	-57777	FALSE
Foxp3 27	chr1	108509481	108509795	shared	D630008O14Rik	-71275	TRUE
Foxp3 1120	chr1	108509913	108510286	WT_specific	D630008O14Rik	-71766	TRUE
Foxp3 1121	chr1	108513792	108514295	WT_specific	D630008O14Rik	-75775	TRUE
Foxp3 1122	chr1	108514910	108515199	WT_specific	D630008O14Rik	-76679	FALSE
Foxp3 1123	chr1	108515633	108515985	WT_specific	D630008O14Rik	-77465	FALSE
Foxp3 5870	chr1	108516453	108516780	IKcKO_specific	D630008O14Rik	-78260	TRUE
Foxp3 1712	chr11	31660025	31660623	WT_specific	D630024D03Rik	63850	TRUE
Foxp3 4728	chr5	106268935	106269312	WT_specific	D830014E11Rik	-15782	TRUE
Foxp3 5404	chr8	37227717	37228081	WT_specific	D8Ertd82e	-70166	TRUE
Foxp3 2617	chr14	54857825	54858366	WT_specific	Dad1	15223	FALSE
Foxp3 2618	chr14	54858527	54859323	WT_specific	Dad1	14266	TRUE
Foxp3 3741	chr2	59308713	59309073	WT_specific	Dapl1	13637	TRUE
Foxp3 4258	chr3	137613085	137613628	WT_specific	Dapp1	4049	TRUE
Foxp3 4259	chr3	137615381	137616468	WT_specific	Dapp1	1209	TRUE
Foxp3 4260	chr3	137616549	137616814	WT_specific	Dapp1	863	TRUE
Foxp3 4261	chr3	137618477	137618952	WT_specific	Dapp1	-121	TRUE
Foxp3 198	chr3	137644071	137644553	shared	Dapp1	-59	TRUE
Foxp3 3255	chr17	50470740	50471416	WT_specific	Dazl	-38492	TRUE
Foxp3 1128	chr1	121996361	121996744	WT_specific	Dbi	19971	TRUE
Foxp3 2043	chr11	105894783	105895341	WT_specific	Dcaf7	2845	TRUE
Foxp3 5602	chr9	34983390	34983607	WT_specific	Dcps	-29	TRUE
Foxp3 5396	chr8	35146486	35146861	WT_specific	Dctn6	9118	TRUE
Foxp3 1690	chr11	11735516	11735781	WT_specific	Ddc	502	FALSE
Foxp3 1450	chr10	59436828	59438112	WT_specific	Ddit4	-23594	TRUE
Foxp3 5909	chr10	59402866	59403202	IKcKO_specific	Ddit4	11316	FALSE
Foxp3 869	chr17	35841814	35842509	shared	Ddr1	-943	TRUE
Foxp3 3220	chr17	35844131	35844411	WT_specific	Ddr1	-2845	FALSE
Foxp3 4334	chr4	40185687	40186306	WT_specific	Ddx58	427	TRUE
Foxp3 1165	chr1	138302106	138302479	WT_specific	Ddx59	9369	FALSE
Foxp3 473	chr9	44375491	44375973	shared	Ddx6	37002	TRUE
Foxp3 474	chr9	44391196	44391547	shared	Ddx6	21428	FALSE
Foxp3 5633	chr9	44386319	44386516	WT_specific	Ddx6	26459	FALSE
Foxp3 5634	chr9	44389674	44389976	WT_specific	Ddx6	22999	TRUE
Foxp3 5635	chr9	44390476	44390906	WT_specific	Ddx6	22069	TRUE
Foxp3 5636	chr9	44392107	44392450	WT_specific	Ddx6	20525	FALSE
Foxp3 3148	chr17	28348165	28348860	WT_specific	Def6	-4078	TRUE
Foxp3 3149	chr17	28348913	28349624	WT_specific	Def6	-4842	TRUE
Foxp3 3150	chr17	28354497	28355655	WT_specific	Def6	-10873	TRUE
Foxp3 2636	chr14	63546694	63546998	WT_specific	Defb48	56349	TRUE
Foxp3 2637	chr14	63559253	63559887	WT_specific	Defb48	43460	TRUE
Foxp3 4196	chr3	106264606	106265558	WT_specific	Dennd2d	19765	TRUE
Foxp3 4198	chr3	106288431	106289311	WT_specific	Dennd2d	-343	TRUE
Foxp3 4199	chr3	106290663	106291032	WT_specific	Dennd2d	-2064	FALSE
Foxp3 490	chr9	64636119	64636813	shared	Dennd4a	22334	FALSE
Foxp3 491	chr9	64678423	64678701	shared	Dennd4a	-19350	FALSE
Foxp3 5699	chr9	64672215	64672627	WT_specific	Dennd4a	-13276	TRUE
Foxp3 5700	chr9	64673041	64673366	WT_specific	Dennd4a	-14015	TRUE
Foxp3 4396	chr4	86358493	86359024	WT_specific	Dennd4c	35435	TRUE
Foxp3 4780	chr5	124347008	124347257	WT_specific	Denr	9927	FALSE
Foxp3 2784	chr15	57709793	57710226	WT_specific	Derl1	13747	TRUE
Foxp3 1646	chr10	128168153	128168502	WT_specific	Dgka	12610	TRUE
Foxp3 1647	chr10	128182339	128182639	WT_specific	Dgka	-1527	TRUE
Foxp3 1085	chr1	89743006	89744112	WT_specific	Dgkd	5750	TRUE
Foxp3 1086	chr1	89796295	89796724	WT_specific	Dgkd	-46862	TRUE
Foxp3 786	chr14	79098189	79099057	shared	Dgkh	25839	TRUE
Foxp3 2692	chr14	79109835	79110335	WT_specific	Dgkh	14561	FALSE
Foxp3 6014	chr14	79113443	79113693	IKcKO_specific	Dgkh	11203	FALSE
Foxp3 6137	chr2	158639421	158639661	IKcKO_specific	Dhx35	13493	FALSE
Foxp3 2031	chr11	101594025	101594580	WT_specific	Dhx8	-225	TRUE
Foxp3 3392	chr18	38036797	38037111	WT_specific	Diap1	13670	TRUE
Foxp3 6016	chr14	87565232	87565474	IKcKO_specific	Diap3	-24443	FALSE
Foxp3 825	chr15	99890659	99891734	shared	Dip2b	-22639	TRUE
Foxp3 2632	chr14	62334959	62335235	WT_specific	Dleu2	-34073	FALSE
Foxp3 2604	chr14	48037510	48037844	WT_specific	Dlgap5	238	TRUE
Foxp3 2137	chr11	118005725	118006165	WT_specific	Dnahc17	-15632	FALSE
Foxp3 2138	chr11	118007031	118008282	WT_specific	Dnahc17	-17749	TRUE
Foxp3 2139	chr11	118008608	118009801	WT_specific	Dnahc17	-19268	TRUE
Foxp3 2140	chr11	118013657	118013912	WT_specific	Dnahc17	-23379	FALSE
Foxp3 2755	chr15	28119451	28119708	WT_specific	Dnahc5	13799	TRUE
Foxp3 2947	chr16	4692712	4693031	WT_specific	Dnaja3	-8917	FALSE
Foxp3 6292	chr9	54531826	54532035	IKcKO_specific	Dnaja4	14645	TRUE
Foxp3 1457	chr10	62845042	62845705	WT_specific	Dnajc12	-514	TRUE
Foxp3 545	chr10	62848999	62849633	shared	Dnajc12	-314	TRUE
Foxp3 160	chr3	19329494	19330408	shared	Dnajc5b	78187	TRUE
Foxp3 2012	chr11	100449357	100449884	WT_specific	Dnajc7	2458	TRUE
Foxp3 2013	chr11	100450057	100450478	WT_specific	Dnajc7	1864	TRUE
Foxp3 2014	chr11	100453979	100454331	WT_specific	Dnajc7	-1989	FALSE
Foxp3 5957	chr11	100470821	100471748	IKcKO_specific	Dnajc7	2908	TRUE
Foxp3 2550	chr14	8822002	8822255	WT_specific	Dnase1l3	4832	TRUE
Foxp3 2551	chr14	8829819	8830154	WT_specific	Dnase1l3	-3067	TRUE
Foxp3 454	chr9	21240335	21241502	shared	Dnm2	-11814	TRUE
Foxp3 53	chr1	164137386	164137923	shared	Dnm3os	9831	TRUE
Foxp3 1236	chr1	164139088	164139406	WT_specific	Dnm3os	8348	FALSE
Foxp3 3800	chr2	83584701	83585564	WT_specific	Dnmt3l-ps1	329	TRUE
Foxp3 3553	chr19	41105520	41106038	WT_specific	Dntt	-2273	TRUE
Foxp3 1062	chr1	80742208	80742782	WT_specific	Dock10	12346	TRUE
Foxp3 1061	chr1	80730362	80730615	WT_specific	Dock10	24513	FALSE
Foxp3 18	chr1	80743239	80743656	shared	Dock10	11472	TRUE
Foxp3 1063	chr1	80745659	80746046	WT_specific	Dock10	9082	FALSE
Foxp3 1729	chr11	34551071	34551350	WT_specific	Dock2	46035	TRUE
Foxp3 1730	chr11	34582641	34583200	WT_specific	Dock2	14185	TRUE
Foxp3 608	chr11	34584408	34585258	shared	Dock2	12127	TRUE
Foxp3 609	chr11	34595711	34596262	shared	Dock2	1123	TRUE
Foxp3 1731	chr11	34585829	34586607	WT_specific	Dock2	10778	FALSE
Foxp3 2650	chr14	68543520	68543771	WT_specific	Dock5	7858	FALSE
Foxp3 3517	chr19	25127076	25127580	WT_specific	Dock8	-53561	TRUE
Foxp3 3518	chr19	25127854	25128194	WT_specific	Dock8	-54175	FALSE
Foxp3 6140	chr2	170574589	170574773	IKcKO_specific	Dok5	-17466	FALSE
Foxp3 868	chr17	35772227	35773211	shared	Dpcr1	7429	TRUE
Foxp3 6064	chr17	35773268	35773736	IKcKO_specific	Dpcr1	6904	TRUE
Foxp3 4214	chr3	115636300	115636684	WT_specific	Dph5	-45583	TRUE
Foxp3 3706	chr2	32426212	32426832	WT_specific	Dpm2	-445	TRUE
Foxp3 3751	chr2	62228810	62229283	WT_specific	Dpp4	-12978	TRUE
Foxp3 3752	chr2	62229362	62229691	WT_specific	Dpp4	-13386	TRUE
Foxp3 3753	chr2	62232412	62232794	WT_specific	Dpp4	-16489	TRUE
Foxp3 2649	chr14	67464915	67465125	WT_specific	Dpysl2	22400	TRUE
Foxp3 5920	chr10	87831714	87831908	IKcKO_specific	Dram1	9917	FALSE
Foxp3 939	chr1	34062891	34063479	WT_specific	Dst	5191	TRUE
Foxp3 2162	chr12	3545493	3546153	WT_specific	Dtnb	26228	FALSE
Foxp3 858	chr17	26639727	26640672	shared	Dusp1	3996	TRUE
Foxp3 3139	chr17	26638576	26639487	WT_specific	Dusp1	5181	FALSE
Foxp3 68	chr1	185811514	185811896	shared	Dusp10	25285	TRUE
Foxp3 1319	chr1	185829074	185829966	WT_specific	Dusp10	7215	TRUE
Foxp3 1320	chr1	185871812	185872162	WT_specific	Dusp10	-13902	TRUE
Foxp3 1321	chr1	185875877	185876163	WT_specific	Dusp10	-17903	TRUE
Foxp3 3797	chr2	80456967	80457772	WT_specific	Dusp19	-349	TRUE
Foxp3 3844	chr2	127139446	127140714	WT_specific	Dusp2	21181	TRUE
Foxp3 135	chr2	127144066	127146037	shared	Dusp2	15858	TRUE
Foxp3 5398	chr8	35685730	35686018	WT_specific	Dusp4	184333	TRUE
Foxp3 5399	chr8	35734525	35735077	WT_specific	Dusp4	135274	TRUE
Foxp3 5400	chr8	35794695	35795369	WT_specific	Dusp4	74982	TRUE
Foxp3 423	chr8	35803713	35804396	shared	Dusp4	65955	TRUE
Foxp3 5401	chr8	35819669	35820108	WT_specific	Dusp4	50243	TRUE
Foxp3 5402	chr8	35859972	35861191	WT_specific	Dusp4	9160	TRUE
Foxp3 3587	chr19	53593599	53594208	WT_specific	Dusp5	9391	TRUE
Foxp3 3588	chr19	53594433	53594883	WT_specific	Dusp5	8716	TRUE
Foxp3 3589	chr19	53609467	53610311	WT_specific	Dusp5	-6712	TRUE
Foxp3 3590	chr19	53610887	53611448	WT_specific	Dusp5	-7849	TRUE
Foxp3 3591	chr19	53613158	53613812	WT_specific	Dusp5	-10213	TRUE
Foxp3 3592	chr19	53619767	53620145	WT_specific	Dusp5	-16546	TRUE
Foxp3 566	chr10	98704114	98705145	shared	Dusp6	20720	TRUE
Foxp3 1573	chr10	98725561	98725935	WT_specific	Dusp6	-70	TRUE
Foxp3 1572	chr10	98698288	98698590	WT_specific	Dusp6	27275	FALSE
Foxp3 567	chr10	98731046	98732357	shared	Dusp6	-6492	TRUE
Foxp3 1574	chr10	98749421	98749795	WT_specific	Dusp6	-23930	TRUE
Foxp3 5483	chr8	119028523	119029061	WT_specific	Dynlrb2	-146	TRUE
Foxp3 3107	chr16	94810566	94811164	WT_specific	Dyrk1a	-18650	TRUE
Foxp3 3111	chr16	94946111	94946900	WT_specific	Dyrk1a	-56397	TRUE
Foxp3 576	chr10	118319639	118320150	shared	Dyrk2	-14191	TRUE
Foxp3 1613	chr10	118320294	118320749	WT_specific	Dyrk2	-14790	TRUE
Foxp3 4520	chr4	135715772	135716351	WT_specific	E2f2	11958	TRUE
Foxp3 4521	chr4	135716493	135716904	WT_specific	E2f2	11405	FALSE
Foxp3 4522	chr4	135719489	135719847	WT_specific	E2f2	8462	TRUE
Foxp3 4523	chr4	135735899	135736658	WT_specific	E2f2	40	TRUE
Foxp3 5187	chr7	56164658	56164927	WT_specific	E2f8	-27961	TRUE
Foxp3 4460	chr4	129591083	129591462	WT_specific	E330017L17Rik	-7785	TRUE
Foxp3 4137	chr3	95525679	95526856	WT_specific	Ecm1	12085	TRUE
Foxp3 5020	chr6	108785432	108786159	WT_specific	Edem1	-7524	TRUE
Foxp3 5021	chr6	108786213	108786733	WT_specific	Edem1	-8098	TRUE
Foxp3 5264	chr7	97190758	97191108	WT_specific	Eed	-61615	TRUE
Foxp3 5073	chr6	127532176	127532949	WT_specific	Efcab4b	-4956	TRUE
Foxp3 4405	chr4	99495695	99496109	WT_specific	Efcab7	-220	TRUE
Foxp3 3268	chr17	62887872	62888124	WT_specific	Efna5	67932	FALSE
Foxp3 6254	chr7	89797472	89797903	IKcKO_specific	Eftud1	-752	TRUE
Foxp3 3389	chr18	35010138	35010492	WT_specific	Egr1	8985	FALSE
Foxp3 3390	chr18	35014562	35016166	WT_specific	Egr1	3311	TRUE
Foxp3 1463	chr10	66966553	66966848	WT_specific	Egr2	31375	TRUE
Foxp3 1464	chr10	66967254	66967685	WT_specific	Egr2	30538	FALSE
Foxp3 2656	chr14	70463069	70463325	WT_specific	Egr3	13927	FALSE
Foxp3 2657	chr14	70465238	70466147	WT_specific	Egr3	11105	TRUE
Foxp3 3304	chr17	74163470	74164015	WT_specific	Ehd3	-9834	TRUE
Foxp3 3305	chr17	74171550	74171808	WT_specific	Ehd3	-17627	TRUE
Foxp3 4041	chr3	58321361	58321665	WT_specific	Eif2a	8078	TRUE
Foxp3 327	chr6	70773974	70775333	shared	Eif2ak3	19176	TRUE
Foxp3 2844	chr15	72978916	72979330	WT_specific	Eif2c2	35940	TRUE
Foxp3 808	chr15	72979489	72981321	shared	Eif2c2	33949	TRUE
Foxp3 809	chr15	72981437	72981860	shared	Eif2c2	33410	TRUE
Foxp3 2845	chr15	72983300	72984091	WT_specific	Eif2c2	31179	TRUE
Foxp3 2846	chr15	72984265	72984874	WT_specific	Eif2c2	30396	TRUE
Foxp3 2847	chr15	72985090	72985708	WT_specific	Eif2c2	29562	TRUE
Foxp3 1151	chr1	133078554	133079198	WT_specific	Eif2d	-16242	TRUE
Foxp3 6030	chr15	51334937	51335201	IKcKO_specific	Eif3h	361809	FALSE
Foxp3 787	chr14	79929418	79929725	shared	Elf1	-14232	FALSE
Foxp3 2697	chr14	79913391	79913753	WT_specific	Elf1	1728	FALSE
Foxp3 2698	chr14	79916876	79917464	WT_specific	Elf1	-1971	FALSE
Foxp3 2699	chr14	79918553	79918863	WT_specific	Elf1	-3370	FALSE
Foxp3 2700	chr14	79918955	79919594	WT_specific	Elf1	-4101	FALSE
Foxp3 2701	chr14	79921343	79921582	WT_specific	Elf1	-6089	FALSE
Foxp3 2702	chr14	79931874	79932197	WT_specific	Elf1	-16704	TRUE
Foxp3 2703	chr14	79936001	79936362	WT_specific	Elf1	-20869	FALSE
Foxp3 2704	chr14	79937270	79937575	WT_specific	Elf1	-22082	TRUE
Foxp3 4008	chr3	51168941	51169993	WT_specific	Elf2	-25413	TRUE
Foxp3 5840	chrX	45780796	45781511	WT_specific	Elf4	25835	FALSE
Foxp3 1529	chr10	92724093	92724391	WT_specific	Elk3	49165	TRUE
Foxp3 1530	chr10	92798679	92799360	WT_specific	Elk3	-25480	TRUE
Foxp3 557	chr10	92805831	92806403	shared	Elk3	-32523	TRUE
Foxp3 1531	chr10	92820296	92820609	WT_specific	Elk3	-46729	FALSE
Foxp3 1532	chr10	92827386	92828468	WT_specific	Elk3	-54588	TRUE
Foxp3 33	chr1	133907476	133908126	shared	Elk4	-3252	TRUE
Foxp3 717	chr13	20275162	20277576	shared	Elmo1	-282	TRUE
Foxp3 2361	chr13	20230953	20231217	WT_specific	Elmo1	46077	FALSE
Foxp3 6300	chr9	77784736	77785101	IKcKO_specific	Elovl5	3997	FALSE
Foxp3 4228	chr3	129197123	129197359	WT_specific	Elovl6	37945	TRUE
Foxp3 4229	chr3	129256082	129256454	WT_specific	Elovl6	-21150	TRUE
Foxp3 2544	chr13	117984577	117984995	WT_specific	Emb	24437	TRUE
Foxp3 2545	chr13	117991530	117992431	WT_specific	Emb	17001	TRUE
Foxp3 2547	chr13	117999927	118000702	WT_specific	Emb	8730	TRUE
Foxp3 756	chr13	118004264	118004618	shared	Emb	4814	TRUE
Foxp3 2546	chr13	117999267	117999613	WT_specific	Emb	9819	FALSE
Foxp3 757	chr13	118004695	118005351	shared	Emb	4081	TRUE
Foxp3 588	chr11	5076430	5077607	shared	Emid1	-25347	TRUE
Foxp3 3322	chr17	83765363	83765651	WT_specific	Eml4	-15380	TRUE
Foxp3 6071	chr17	83796873	83797298	IKcKO_specific	Eml4	7245	TRUE
Foxp3 366	chr6	135312364	135313352	shared	Emp1	-403	TRUE
Foxp3 1313	chr1	183980405	183981143	WT_specific	Enah	-31032	FALSE
Foxp3 5537	chr9	14143847	14144028	WT_specific	Endod1	41658	FALSE
Foxp3 5538	chr9	14152972	14153439	WT_specific	Endod1	32247	TRUE
Foxp3 5539	chr9	14170649	14170911	WT_specific	Endod1	14775	FALSE
Foxp3 5540	chr9	14212588	14212891	WT_specific	Endod1	-26940	FALSE
Foxp3 2923	chr15	97548408	97548721	WT_specific	Endou	2860	TRUE
Foxp3 1402	chr10	24355205	24356252	WT_specific	Enpp1	37812	TRUE
Foxp3 1403	chr10	24356671	24357070	WT_specific	Enpp1	36994	FALSE
Foxp3 1404	chr10	24370403	24371204	WT_specific	Enpp1	22860	TRUE
Foxp3 1405	chr10	24473915	24474472	WT_specific	Enpp1	-42507	TRUE
Foxp3 3235	chr17	44159128	44159324	WT_specific	Enpp5	56438	FALSE
Foxp3 427	chr8	48026350	48028446	shared	Enpp6	43833	TRUE
Foxp3 428	chr8	48028606	48029611	shared	Enpp6	42668	TRUE
Foxp3 2882	chr15	80367723	80368175	WT_specific	Enthd1	22725	TRUE
Foxp3 2883	chr15	80369422	80369754	WT_specific	Enthd1	21146	TRUE
Foxp3 818	chr15	80390043	80390942	shared	Enthd1	-42	TRUE
Foxp3 2884	chr15	80402055	80403290	WT_specific	Enthd1	-12390	TRUE
Foxp3 2885	chr15	80406353	80406711	WT_specific	Enthd1	-15811	FALSE
Foxp3 2886	chr15	80409123	80409767	WT_specific	Enthd1	-18867	FALSE
Foxp3 2887	chr15	80420392	80421194	WT_specific	Enthd1	-30294	TRUE
Foxp3 3550	chr19	40734629	40735445	WT_specific	Entpd1	-462	TRUE
Foxp3 3551	chr19	40752690	40753377	WT_specific	Entpd1	2780	TRUE
Foxp3 3552	chr19	40754170	40755147	WT_specific	Entpd1	1010	TRUE
Foxp3 6092	chr19	40759343	40759604	IKcKO_specific	Entpd1	-3447	FALSE
Foxp3 3356	chr17	87178568	87178996	WT_specific	Epas1	-25749	TRUE
Foxp3 4463	chr4	131564350	131564788	WT_specific	Epb4.1	-1435	TRUE
Foxp3 6177	chr4	131561388	131561631	IKcKO_specific	Epb4.1	-1922	FALSE
Foxp3 1303	chr1	182917723	182918232	WT_specific	Ephx1	8069	TRUE
Foxp3 6062	chr17	32352154	32352617	IKcKO_specific	Ephx3	-26123	FALSE
Foxp3 5426	chr8	74889211	74889563	WT_specific	Eps15l1	35335	TRUE
Foxp3 2471	chr13	74701481	74702013	WT_specific	Erap1	75307	TRUE
Foxp3 890	chr18	32399574	32400185	shared	Ercc3	-177	TRUE
Foxp3 3140	chr17	26688899	26689615	WT_specific	Ergic1	8819	FALSE
Foxp3 3530	chr19	29715224	29715881	WT_specific	Ermp1	-1828	TRUE
Foxp3 5112	chr6	136879177	136879506	WT_specific	Erp27	-8805	TRUE
Foxp3 2536	chr13	113988316	113988816	WT_specific	Esm1	11051	TRUE
Foxp3 1337	chr10	5713652	5714038	WT_specific	Esr1	20457	TRUE
Foxp3 1642	chr10	127973360	127974096	WT_specific	Esyt1	-11170	TRUE
Foxp3 5564	chr9	32399255	32399609	WT_specific	Ets1	44197	TRUE
Foxp3 458	chr9	32511974	32512371	shared	Ets1	-8744	FALSE
Foxp3 5565	chr9	32399744	32400641	WT_specific	Ets1	43165	TRUE
Foxp3 5566	chr9	32401957	32402386	WT_specific	Ets1	41420	TRUE
Foxp3 461	chr9	32531819	32532454	shared	Ets1	-28827	FALSE
Foxp3 5568	chr9	32420475	32420814	WT_specific	Ets1	22992	TRUE
Foxp3 463	chr9	32537417	32537925	shared	Ets1	-34298	FALSE
Foxp3 5570	chr9	32423595	32423953	WT_specific	Ets1	19853	TRUE
Foxp3 5571	chr9	32427949	32428877	WT_specific	Ets1	14929	TRUE
Foxp3 457	chr9	32459125	32460106	shared	Ets1	-16300	TRUE
Foxp3 5572	chr9	32468691	32469300	WT_specific	Ets1	-25494	TRUE
Foxp3 6285	chr9	32508658	32509064	IKcKO_specific	Ets1	-5437	TRUE
Foxp3 5573	chr9	32511401	32511702	WT_specific	Ets1	-8075	TRUE
Foxp3 5576	chr9	32516841	32517996	WT_specific	Ets1	-14369	TRUE
Foxp3 5567	chr9	32420030	32420364	WT_specific	Ets1	23442	FALSE
Foxp3 459	chr9	32518878	32520818	shared	Ets1	-17191	TRUE
Foxp3 5569	chr9	32422050	32422391	WT_specific	Ets1	21415	FALSE
Foxp3 5580	chr9	32526557	32526826	WT_specific	Ets1	-23199	TRUE
Foxp3 460	chr9	32530243	32530679	shared	Ets1	-27052	TRUE
Foxp3 462	chr9	32534208	32534624	shared	Ets1	-30997	TRUE
Foxp3 464	chr9	32538287	32540411	shared	Ets1	-36784	TRUE
Foxp3 5574	chr9	32514549	32515052	WT_specific	Ets1	-11425	FALSE
Foxp3 5575	chr9	32515625	32515843	WT_specific	Ets1	-12216	FALSE
Foxp3 465	chr9	32550400	32552844	shared	Ets1	-49217	TRUE
Foxp3 5577	chr9	32523317	32524017	WT_specific	Ets1	-20390	FALSE
Foxp3 5578	chr9	32524981	32525280	WT_specific	Ets1	-21653	FALSE
Foxp3 5579	chr9	32525516	32526070	WT_specific	Ets1	-22443	FALSE
Foxp3 5587	chr9	32557277	32557769	WT_specific	Ets1	-54142	TRUE
Foxp3 5581	chr9	32527519	32529525	WT_specific	Ets1	-25898	FALSE
Foxp3 5582	chr9	32532892	32533989	WT_specific	Ets1	-30362	FALSE
Foxp3 5583	chr9	32534626	32535210	WT_specific	Ets1	-31583	FALSE
Foxp3 5584	chr9	32535430	32535940	WT_specific	Ets1	-32313	FALSE
Foxp3 5585	chr9	32536848	32537148	WT_specific	Ets1	-33521	FALSE
Foxp3 5586	chr9	32544470	32544982	WT_specific	Ets1	-41355	FALSE
Foxp3 5590	chr9	32708834	32709287	WT_specific	Ets1	-205660	TRUE
Foxp3 5588	chr9	32560163	32560740	WT_specific	Ets1	-57113	FALSE
Foxp3 5589	chr9	32623848	32624299	WT_specific	Ets1	-120672	FALSE
Foxp3 5591	chr9	32717694	32717991	WT_specific	Ets1	-214364	TRUE
Foxp3 466	chr9	32718209	32719109	shared	Ets1	-215482	TRUE
Foxp3 5592	chr9	32719964	32720242	WT_specific	Ets1	-216615	FALSE
Foxp3 5593	chr9	32723037	32723789	WT_specific	Ets1	-220162	TRUE
Foxp3 5594	chr9	32724333	32724588	WT_specific	Ets1	-220961	FALSE
Foxp3 5595	chr9	32731054	32731283	WT_specific	Ets1	-227656	FALSE
Foxp3 5596	chr9	32734353	32734609	WT_specific	Ets1	-230982	FALSE
Foxp3 5597	chr9	32736884	32737158	WT_specific	Ets1	-233531	FALSE
Foxp3 5598	chr9	32738816	32739743	WT_specific	Ets1	-236116	FALSE
Foxp3 467	chr9	32733253	32734270	shared	Ets1	-230643	TRUE
Foxp3 5600	chr9	32750387	32750755	WT_specific	Ets1	-247128	FALSE
Foxp3 5599	chr9	32748642	32748910	WT_specific	Ets1	-245283	TRUE
Foxp3 5601	chr9	32867823	32868383	WT_specific	Ets1	-364756	TRUE
Foxp3 6286	chr9	32512616	32513108	IKcKO_specific	Ets1	-9481	FALSE
Foxp3 6287	chr9	32543221	32543778	IKcKO_specific	Ets1	-40151	FALSE
Foxp3 853	chr16	95950765	95951111	shared	Ets2	-13650	TRUE
Foxp3 3113	chr16	95971523	95972049	WT_specific	Ets2	-34588	TRUE
Foxp3 3114	chr16	95972474	95973074	WT_specific	Ets2	-35613	FALSE
Foxp3 2968	chr16	22432076	22432353	WT_specific	Etv5	4234	TRUE
Foxp3 2969	chr16	22466507	22466759	WT_specific	Etv5	-26967	TRUE
Foxp3 5092	chr6	134017268	134017658	WT_specific	Etv6	-31607	TRUE
Foxp3 5095	chr6	134209022	134209202	WT_specific	Etv6	-11619	TRUE
Foxp3 6233	chr6	134013756	134013994	IKcKO_specific	Etv6	-27943	FALSE
Foxp3 1894	chr11	79340596	79341359	WT_specific	Evi2a	-82	TRUE
Foxp3 2343	chr12	109873979	109874225	WT_specific	Evl	-262	TRUE
Foxp3 2341	chr12	109872562	109872840	WT_specific	Evl	1123	FALSE
Foxp3 2342	chr12	109873066	109873610	WT_specific	Evl	353	FALSE
Foxp3 2344	chr12	109875677	109876155	WT_specific	Evl	-2192	TRUE
Foxp3 709	chr12	109883893	109884535	shared	Evl	-10572	TRUE
Foxp3 919	chr19	37634369	37634911	shared	Exoc6	-10003	TRUE
Foxp3 3548	chr19	37635129	37635424	WT_specific	Exoc6	-10516	FALSE
Foxp3 4040	chr3	54527660	54528328	WT_specific	Exosc8	5052	TRUE
Foxp3 3929	chr2	165480154	165480456	WT_specific	Eya2	342	TRUE
Foxp3 4473	chr4	132167590	132167900	WT_specific	Eya3	27002	TRUE
Foxp3 4474	chr4	132208820	132209079	WT_specific	Eya3	3536	TRUE
Foxp3 4475	chr4	132215070	132215666	WT_specific	Eya3	-3051	TRUE
Foxp3 4476	chr4	132233064	132233402	WT_specific	Eya3	-20787	FALSE
Foxp3 2451	chr13	55533786	55535274	WT_specific	F12	-7120	TRUE
Foxp3 2476	chr13	96455639	96455949	WT_specific	F2rl2	10859	TRUE
Foxp3 2477	chr13	96456277	96456609	WT_specific	F2rl2	10199	TRUE
Foxp3 2478	chr13	96466795	96467156	WT_specific	F2rl2	-348	TRUE
Foxp3 2479	chr13	96482532	96482851	WT_specific	F2rl2	-16043	TRUE
Foxp3 2628	chr14	58438833	58439324	WT_specific	F630043A04Rik	5676	FALSE
Foxp3 1740	chr11	45608413	45608723	WT_specific	F630206G17Rik	12866	TRUE
Foxp3 2182	chr12	33816293	33816718	WT_specific	F730043M19Rik	7768	TRUE
Foxp3 2183	chr12	33816847	33817387	WT_specific	F730043M19Rik	7099	TRUE
Foxp3 5721	chr9	68732531	68732785	WT_specific	F830001A07Rik	-49637	TRUE
Foxp3 5722	chr9	68831404	68831758	WT_specific	F830001A07Rik	-148610	FALSE
Foxp3 4424	chr4	115680245	115681633	WT_specific	Faah	-8960	TRUE
Foxp3 4425	chr4	115682426	115683381	WT_specific	Faah	6899	TRUE
Foxp3 4426	chr4	115684096	115684517	WT_specific	Faah	5763	FALSE
Foxp3 4427	chr4	115688685	115689053	WT_specific	Faah	1227	FALSE
Foxp3 3990	chr3	10205810	10206153	WT_specific	Fabp4	2423	TRUE
Foxp3 5263	chr7	91742492	91743096	WT_specific	Fah	7514	TRUE
Foxp3 5765	chr9	98908802	98909304	WT_specific	Faim	-22512	TRUE
Foxp3 1145	chr1	132760792	132761216	WT_specific	Faim3	1030	TRUE
Foxp3 669	chr11	116283833	116286618	shared	Fam100b	8790	TRUE
Foxp3 4786	chr5	125424447	125425246	WT_specific	Fam101a	58571	TRUE
Foxp3 4787	chr5	125434674	125435163	WT_specific	Fam101a	48654	TRUE
Foxp3 1877	chr11	75851109	75851630	WT_specific	Fam101b	-10346	TRUE
Foxp3 103	chr2	32396803	32397604	shared	Fam102a	-1894	TRUE
Foxp3 3703	chr2	32397760	32398970	WT_specific	Fam102a	-3260	TRUE
Foxp3 3704	chr2	32402244	32402617	WT_specific	Fam102a	-6907	FALSE
Foxp3 3705	chr2	32409594	32410005	WT_specific	Fam102a	-14295	TRUE
Foxp3 2749	chr15	27596868	27597176	WT_specific	Fam105a	14064	FALSE
Foxp3 2750	chr15	27597551	27598573	WT_specific	Fam105a	12667	TRUE
Foxp3 2751	chr15	27598933	27599335	WT_specific	Fam105a	11905	FALSE
Foxp3 2752	chr15	27599811	27600336	WT_specific	Fam105a	10904	TRUE
Foxp3 2753	chr15	27713758	27714243	WT_specific	Fam105a	-102981	TRUE
Foxp3 2748	chr15	27541613	27541998	WT_specific	Fam105b	18450	FALSE
Foxp3 3606	chr2	3620695	3621185	WT_specific	Fam107b	100	TRUE
Foxp3 3607	chr2	3634614	3634835	WT_specific	Fam107b	-4085	TRUE
Foxp3 3608	chr2	3636552	3636836	WT_specific	Fam107b	-6086	TRUE
Foxp3 3609	chr2	3640506	3641547	WT_specific	Fam107b	-10797	TRUE
Foxp3 3610	chr2	3643615	3644313	WT_specific	Fam107b	-13563	TRUE
Foxp3 6099	chr2	3644506	3645201	IKcKO_specific	Fam107b	-14451	TRUE
Foxp3 3611	chr2	3646774	3647421	WT_specific	Fam107b	-16671	FALSE
Foxp3 74	chr2	3647695	3649337	shared	Fam107b	-18587	TRUE
Foxp3 3514	chr19	21788302	21788744	WT_specific	Fam108b	-60945	TRUE
Foxp3 1963	chr11	95216546	95217268	WT_specific	Fam117a	-15992	TRUE
Foxp3 1964	chr11	95217382	95218832	WT_specific	Fam117a	-17556	TRUE
Foxp3 5860	chr1	59953799	59953988	IKcKO_specific	Fam117b	15862	TRUE
Foxp3 1060	chr1	80209809	80210760	WT_specific	Fam124b	-241	TRUE
Foxp3 1194	chr1	153531382	153532305	WT_specific	Fam129a	-8008	TRUE
Foxp3 1195	chr1	153532817	153533489	WT_specific	Fam129a	-9192	FALSE
Foxp3 1196	chr1	153533774	153534247	WT_specific	Fam129a	-9950	FALSE
Foxp3 1197	chr1	153536656	153537001	WT_specific	Fam129a	-12704	TRUE
Foxp3 4607	chr5	3509007	3509612	WT_specific	Fam133b	34232	TRUE
Foxp3 2747	chr15	25829824	25830556	WT_specific	Fam134b	40086	TRUE
Foxp3 4454	chr4	129257440	129257957	WT_specific	Fam167b	-2164	TRUE
Foxp3 5282	chr7	107880087	107880455	WT_specific	Fam168a	-25239	FALSE
Foxp3 6245	chr7	75420326	75420648	IKcKO_specific	Fam169b	233	TRUE
Foxp3 5201	chr7	75420760	75421644	WT_specific	Fam169b	-763	TRUE
Foxp3 5208	chr7	75441376	75442363	WT_specific	Fam169b	2636	TRUE
Foxp3 1108	chr1	97164574	97164997	WT_specific	Fam174a	45208	TRUE
Foxp3 4096	chr3	88997641	88998280	WT_specific	Fam189b	-6374	TRUE
Foxp3 1215	chr1	158682581	158682844	WT_specific	Fam20b	-33712	TRUE
Foxp3 1410	chr10	33830790	33831374	WT_specific	Fam26e	-15049	TRUE
Foxp3 6210	chr6	22281809	22282088	IKcKO_specific	Fam3c	-2632	TRUE
Foxp3 303	chr6	22359061	22359404	shared	Fam3c	-53161	TRUE
Foxp3 4842	chr6	22362250	22362784	WT_specific	Fam3c	-56541	TRUE
Foxp3 4153	chr3	100286090	100286661	WT_specific	Fam46c	6456	TRUE
Foxp3 2813	chr15	63890782	63891111	WT_specific	Fam49b	899	TRUE
Foxp3 2814	chr15	63906679	63906988	WT_specific	Fam49b	-14978	TRUE
Foxp3 803	chr15	63907109	63907808	shared	Fam49b	-15798	TRUE
Foxp3 5361	chr7	139985176	139985550	WT_specific	Fam53b	-6932	TRUE
Foxp3 5362	chr7	139990288	139990727	WT_specific	Fam53b	3706	TRUE
Foxp3 5363	chr7	139996196	139996975	WT_specific	Fam53b	-2528	TRUE
Foxp3 5364	chr7	139997992	139998273	WT_specific	Fam53b	790	FALSE
Foxp3 3050	chr16	55888046	55888578	WT_specific	Fam55c	6814	TRUE
Foxp3 3051	chr16	55888699	55889051	WT_specific	Fam55c	6341	TRUE
Foxp3 2373	chr13	24638683	24639115	WT_specific	Fam65b	34943	TRUE
Foxp3 2374	chr13	24639373	24640176	WT_specific	Fam65b	33882	TRUE
Foxp3 2377	chr13	24704919	24705704	WT_specific	Fam65b	775	TRUE
Foxp3 2378	chr13	24706304	24706750	WT_specific	Fam65b	-254	TRUE
Foxp3 2379	chr13	24706866	24707239	WT_specific	Fam65b	-743	FALSE
Foxp3 2380	chr13	24709320	24709654	WT_specific	Fam65b	-3158	TRUE
Foxp3 2381	chr13	24731394	24731844	WT_specific	Fam65b	-1262	TRUE
Foxp3 2382	chr13	24751262	24751492	WT_specific	Fam65b	13316	FALSE
Foxp3 4733	chr5	108389736	108390284	WT_specific	Fam69a	11733	TRUE
Foxp3 4734	chr5	108390536	108391233	WT_specific	Fam69a	10784	TRUE
Foxp3 4735	chr5	108394300	108394711	WT_specific	Fam69a	7306	FALSE
Foxp3 4736	chr5	108401018	108401411	WT_specific	Fam69a	606	FALSE
Foxp3 4737	chr5	108402457	108402823	WT_specific	Fam69a	-806	FALSE
Foxp3 1760	chr11	46207411	46207770	WT_specific	Fam71b	2291	FALSE
Foxp3 1761	chr11	46208763	46208974	WT_specific	Fam71b	1087	FALSE
Foxp3 1762	chr11	46212450	46212871	WT_specific	Fam71b	-2810	TRUE
Foxp3 5529	chr9	13698514	13698881	WT_specific	Fam76b	-57734	TRUE
Foxp3 5530	chr9	13699088	13699787	WT_specific	Fam76b	-58640	TRUE
Foxp3 5531	chr9	13708442	13708655	WT_specific	Fam76b	-67508	TRUE
Foxp3 5532	chr9	13814796	13815540	WT_specific	Fam76b	-174393	TRUE
Foxp3 3695	chr2	31933521	31934448	WT_specific	Fam78a	424	TRUE
Foxp3 2894	chr15	80511714	80512516	WT_specific	Fam83f	-10239	TRUE
Foxp3 2895	chr15	80536632	80536973	WT_specific	Fam83f	-34696	FALSE
Foxp3 5705	chr9	65983207	65983398	WT_specific	Fam96a	-8980	FALSE
Foxp3 3823	chr2	117097511	117097873	WT_specific	Fam98b	-13355	FALSE
Foxp3 2707	chr14	121712519	121712895	WT_specific	Farp1	-58765	FALSE
Foxp3 6019	chr14	121384870	121385104	IKcKO_specific	Farp1	49318	FALSE
Foxp3 49	chr1	163696072	163696476	shared	Fasl	21940	TRUE
Foxp3 50	chr1	163696833	163697234	shared	Fasl	21182	TRUE
Foxp3 1233	chr1	163697371	163697672	WT_specific	Fasl	20744	TRUE
Foxp3 5890	chr1	163717988	163718505	IKcKO_specific	Fasl	-89	TRUE
Foxp3 51	chr1	163734414	163735203	shared	Fasl	-16577	TRUE
Foxp3 52	chr1	163739467	163739862	shared	Fasl	-21236	TRUE
Foxp3 1041	chr1	63777155	63777480	WT_specific	Fastkd2	-263	TRUE
Foxp3 6283	chr9	15806277	15806660	IKcKO_specific	Fat3	-44394	FALSE
Foxp3 5034	chr6	119458082	119458473	WT_specific	Fbxl14	-28787	TRUE
Foxp3 1314	chr1	184291767	184292228	WT_specific	Fbxo28	-20491	FALSE
Foxp3 1315	chr1	184299610	184300249	WT_specific	Fbxo28	-28512	TRUE
Foxp3 5740	chr9	77921510	77922130	WT_specific	Fbxo9	10408	TRUE
Foxp3 1262	chr1	173160965	173161426	WT_specific	Fcer1g	3044	FALSE
Foxp3 5283	chr7	108241151	108241582	WT_specific	Fchsd2	15707	TRUE
Foxp3 1259	chr1	172831843	172832173	WT_specific	Fcrlb	10899	TRUE
Foxp3 2786	chr15	58516725	58517628	WT_specific	Fer1l6	-37568	TRUE
Foxp3 3478	chr19	7092082	7092647	WT_specific	Fermt3	1312	TRUE
Foxp3 862	chr17	29530230	29532392	shared	Fgd2	-18946	TRUE
Foxp3 863	chr17	29532577	29533663	shared	Fgd2	-20217	TRUE
Foxp3 864	chr17	29565870	29566966	shared	Fgd2	-53520	TRUE
Foxp3 3158	chr17	29529527	29530088	WT_specific	Fgd2	-16642	FALSE
Foxp3 3159	chr17	29567255	29567605	WT_specific	Fgd2	-54159	TRUE
Foxp3 3160	chr17	29567798	29568633	WT_specific	Fgd2	-55187	FALSE
Foxp3 2429	chr13	49396389	49396919	WT_specific	Fgd3	-2530	TRUE
Foxp3 2430	chr13	49402707	49403197	WT_specific	Fgd3	1412	TRUE
Foxp3 2431	chr13	49403378	49404590	WT_specific	Fgd3	19	TRUE
Foxp3 5388	chr8	26688767	26689764	WT_specific	Fgfr1	-9569	TRUE
Foxp3 4480	chr4	132532722	132533148	WT_specific	Fgr	-117	TRUE
Foxp3 2552	chr14	11284952	11285347	WT_specific	Fhit	625	TRUE
Foxp3 758	chr14	11285509	11286628	shared	Fhit	-656	TRUE
Foxp3 1689	chr11	11688452	11689006	WT_specific	Fignl1	12458	TRUE
Foxp3 3056	chr16	57399627	57400003	WT_specific	Filip1l	-46613	TRUE
Foxp3 3057	chr16	57470524	57470889	WT_specific	Filip1l	78466	TRUE
Foxp3 3151	chr17	28604607	28604984	WT_specific	Fkbp5	18110	TRUE
Foxp3 5158	chr7	17389863	17390229	WT_specific	Fkrp	10249	TRUE
Foxp3 5559	chr9	32302923	32303577	WT_specific	Fli1	45397	TRUE
Foxp3 455	chr9	32306933	32307917	shared	Fli1	41057	TRUE
Foxp3 5560	chr9	32311483	32312143	WT_specific	Fli1	36831	TRUE
Foxp3 456	chr9	32313103	32316025	shared	Fli1	32949	TRUE
Foxp3 5561	chr9	32317130	32317555	WT_specific	Fli1	31419	TRUE
Foxp3 5562	chr9	32318230	32318667	WT_specific	Fli1	30307	FALSE
Foxp3 5563	chr9	32326109	32326613	WT_specific	Fli1	22361	TRUE
Foxp3 6130	chr2	113533719	113533989	IKcKO_specific	Fmn1	-5709	FALSE
Foxp3 2035	chr11	103035440	103036809	WT_specific	Fmnl1	-4182	TRUE
Foxp3 2036	chr11	103037410	103037743	WT_specific	Fmnl1	4318	FALSE
Foxp3 2037	chr11	103038302	103038837	WT_specific	Fmnl1	3224	FALSE
Foxp3 97	chr2	30916310	30917833	shared	Fnbp1	-6869	TRUE
Foxp3 98	chr2	30918308	30918697	shared	Fnbp1	-7733	TRUE
Foxp3 3683	chr2	30937998	30938728	WT_specific	Fnbp1	13290	TRUE
Foxp3 3684	chr2	30943179	30943596	WT_specific	Fnbp1	8422	TRUE
Foxp3 3682	chr2	30936470	30936756	WT_specific	Fnbp1	15262	FALSE
Foxp3 3685	chr2	30943668	30944290	WT_specific	Fnbp1	7728	TRUE
Foxp3 3686	chr2	30963772	30964280	WT_specific	Fnbp1	748	TRUE
Foxp3 99	chr2	30971032	30971452	shared	Fnbp1	380	TRUE
Foxp3 100	chr2	30971517	30972587	shared	Fnbp1	-755	TRUE
Foxp3 3687	chr2	30985876	30987233	WT_specific	Fnbp1	10089	TRUE
Foxp3 3688	chr2	30988606	30988942	WT_specific	Fnbp1	8380	FALSE
Foxp3 3689	chr2	30990404	30991535	WT_specific	Fnbp1	5787	FALSE
Foxp3 3690	chr2	30999007	30999409	WT_specific	Fnbp1	-1881	TRUE
Foxp3 6111	chr2	30915198	30915471	IKcKO_specific	Fnbp1	-4507	FALSE
Foxp3 2662	chr14	72970401	72970699	WT_specific	Fndc3a	-6174	FALSE
Foxp3 5541	chr9	14706081	14707065	WT_specific	Folr4	-101	TRUE
Foxp3 5542	chr9	14707500	14708871	WT_specific	Folr4	-673	TRUE
Foxp3 5543	chr9	14712672	14713069	WT_specific	Folr4	-4674	TRUE
Foxp3 697	chr12	86785604	86786456	shared	Fos	28384	TRUE
Foxp3 2285	chr12	86782578	86782999	WT_specific	Fos	31841	FALSE
Foxp3 2286	chr12	86787687	86788295	WT_specific	Fos	26545	TRUE
Foxp3 2287	chr12	86798158	86798410	WT_specific	Fos	16430	FALSE
Foxp3 2288	chr12	86832820	86833562	WT_specific	Fos	-17701	TRUE
Foxp3 2302	chr12	100637386	100637729	WT_specific	Foxn3	-5722	FALSE
Foxp3 4019	chr3	52002094	52002363	WT_specific	Foxo1	69896	TRUE
Foxp3 4020	chr3	52061756	52062156	WT_specific	Foxo1	10103	TRUE
Foxp3 1437	chr10	41988885	41989726	WT_specific	Foxo3	6776	TRUE
Foxp3 343	chr6	98942887	98943286	shared	Foxp1	10388	TRUE
Foxp3 344	chr6	98977030	98977622	shared	Foxp1	363	TRUE
Foxp3 4993	chr6	99006422	99006886	WT_specific	Foxp1	-12433	TRUE
Foxp3 4994	chr6	99007078	99007445	WT_specific	Foxp1	-12992	TRUE
Foxp3 4997	chr6	99044625	99044962	WT_specific	Foxp1	1237	TRUE
Foxp3 348	chr6	99213217	99214793	shared	Foxp1	1702	FALSE
Foxp3 345	chr6	99045156	99045983	shared	Foxp1	216	TRUE
Foxp3 4991	chr6	98941554	98941951	WT_specific	Foxp1	11723	FALSE
Foxp3 4992	chr6	98962208	98962506	WT_specific	Foxp1	-8832	FALSE
Foxp3 346	chr6	99046037	99046716	shared	Foxp1	-517	TRUE
Foxp3 347	chr6	99210947	99212016	shared	Foxp1	4479	TRUE
Foxp3 4995	chr6	99014621	99014884	WT_specific	Foxp1	-20431	FALSE
Foxp3 4996	chr6	99043813	99044179	WT_specific	Foxp1	2020	FALSE
Foxp3 5000	chr6	99215633	99216719	WT_specific	Foxp1	-193	TRUE
Foxp3 4998	chr6	99082687	99083149	WT_specific	Foxp1	29863	FALSE
Foxp3 4999	chr6	99097660	99098016	WT_specific	Foxp1	14996	FALSE
Foxp3 5001	chr6	99259676	99260148	WT_specific	Foxp1	-43622	TRUE
Foxp3 5010	chr6	99378770	99379155	WT_specific	Foxp1	6184	TRUE
Foxp3 5011	chr6	99379451	99380020	WT_specific	Foxp1	5319	TRUE
Foxp3 5012	chr6	99382176	99383244	WT_specific	Foxp1	2095	TRUE
Foxp3 5013	chr6	99383515	99384041	WT_specific	Foxp1	1298	TRUE
Foxp3 349	chr6	99472519	99473176	shared	Foxp1	-461	TRUE
Foxp3 5832	chrX	7161015	7161396	WT_specific	Foxp3	2039	TRUE
Foxp3 5833	chrX	7164797	7165226	WT_specific	Foxp3	-1791	FALSE
Foxp3 6305	chrX	7164124	7164627	IKcKO_specific	Foxp3	-1192	FALSE
Foxp3 424	chr8	42502220	42502842	shared	Frg1	-370	TRUE
Foxp3 4990	chr6	97242962	97244463	WT_specific	Frmd4b	14216	TRUE
Foxp3 342	chr6	97261219	97262689	shared	Frmd4b	-265	TRUE
Foxp3 3837	chr2	121619276	121619537	WT_specific	Frmd5	-6457	FALSE
Foxp3 4834	chr5	150971059	150971295	WT_specific	Fry	-50053	TRUE
Foxp3 4672	chr5	73543214	73543785	WT_specific	Fryl	-4410	TRUE
Foxp3 4673	chr5	73584959	73585885	WT_specific	Fryl	-2765	TRUE
Foxp3 4674	chr5	73628143	73629418	WT_specific	Fryl	18246	TRUE
Foxp3 4675	chr5	73656375	73657005	WT_specific	Fryl	-9148	TRUE
Foxp3 2046	chr11	106116503	106117089	WT_specific	Ftsj3	21	TRUE
Foxp3 6227	chr6	117887525	117887888	IKcKO_specific	Fxyd4	-535	TRUE
Foxp3 5178	chr7	31818422	31819294	WT_specific	Fxyd5	4771	TRUE
Foxp3 796	chr15	6518528	6520178	shared	Fyb	9693	TRUE
Foxp3 2736	chr15	6524423	6524867	WT_specific	Fyb	5004	TRUE
Foxp3 2737	chr15	6528395	6528771	WT_specific	Fyb	1100	TRUE
Foxp3 2738	chr15	6529132	6529544	WT_specific	Fyb	327	TRUE
Foxp3 2739	chr15	6529895	6530206	WT_specific	Fyb	-314	TRUE
Foxp3 797	chr15	6542277	6542629	shared	Fyb	-7627	TRUE
Foxp3 2740	chr15	6562009	6562299	WT_specific	Fyb	7295	TRUE
Foxp3 2741	chr15	6574449	6575273	WT_specific	Fyb	-5679	TRUE
Foxp3 6023	chr15	6547883	6548240	IKcKO_specific	Fyb	-13238	FALSE
Foxp3 1413	chr10	39096398	39097541	WT_specific	Fyn	-7932	TRUE
Foxp3 1415	chr10	39122176	39122449	WT_specific	Fyn	17366	TRUE
[truncated: 4,307 more rows]

## Sheet: Sheet2
id	chr	start	end	status	gene_name	dist	in.ocr
Foxp3 2127	chr11	117160849	117161555	WT_specific	44448	7913	TRUE
Foxp3 2129	chr11	117179915	117181194	WT_specific	44448	6553	TRUE
Foxp3 2131	chr11	117186229	117186959	WT_specific	44448	788	TRUE
Foxp3 2132	chr11	117187138	117187940	WT_specific	44448	-193	TRUE
Foxp3 670	chr11	117188118	117188858	shared	44448	-1111	TRUE
Foxp3 2133	chr11	117194650	117196057	WT_specific	44448	-2315	TRUE
Foxp3 4691	chr5	93564594	93564951	WT_specific	44450	2669	TRUE
Foxp3 279	chr5	93581081	93581738	shared	44450	-14118	TRUE
Foxp3 546	chr10	66326831	66328268	shared	1110002J07Rik	54738	TRUE
Foxp3 5913	chr10	66383098	66383519	IKcKO_specific	1110002J07Rik	-513	TRUE
Foxp3 6306	chrX	67638924	67639170	IKcKO_specific	1110012L19Rik	-118	TRUE
Foxp3 3874	chr2	132514394	132515605	WT_specific	1110034G24Rik	288	TRUE
Foxp3 3809	chr2	91284552	91285015	WT_specific	1110051M20Rik	-154	TRUE
Foxp3 2694	chr14	79715511	79715888	WT_specific	1190002H23Rik	-14436	TRUE
Foxp3 2693	chr14	79313881	79314336	WT_specific	1300010F03Rik	-65245	TRUE
Foxp3 3973	chr2	172908992	172909983	WT_specific	1300015D01Rik	26336	TRUE
Foxp3 3974	chr2	172915000	172915369	WT_specific	1300015D01Rik	20950	TRUE
Foxp3 1856	chr11	68829067	68829945	WT_specific	1500010J02Rik	-309	TRUE
Foxp3 854	chr16	96081579	96082913	shared	1600002D24Rik	37407	TRUE
Foxp3 3119	chr16	96091359	96091753	WT_specific	1600002D24Rik	28567	TRUE
Foxp3 3120	chr16	96151553	96152155	WT_specific	1600002D24Rik	-1471	TRUE
Foxp3 1329	chr1	195033964	195034721	WT_specific	1600010F14Rik	-777	TRUE
Foxp3 2997	chr16	33370953	33371250	WT_specific	1700007L15Rik	9563	TRUE
Foxp3 1261	chr1	173044051	173044457	WT_specific	1700009P17Rik	-337	TRUE
Foxp3 3780	chr2	72833588	72834363	WT_specific	1700011J10Rik	-9065	TRUE
Foxp3 1875	chr11	75789570	75791303	WT_specific	1700016K19Rik	22111	TRUE
Foxp3 1876	chr11	75791569	75792003	WT_specific	1700016K19Rik	21411	TRUE
Foxp3 1078	chr1	88312146	88312889	WT_specific	1700019O17Rik	10057	TRUE
Foxp3 1079	chr1	88313100	88313422	WT_specific	1700019O17Rik	9524	TRUE
Foxp3 1080	chr1	88337939	88338324	WT_specific	1700019O17Rik	-15378	TRUE
Foxp3 6142	chr2	173295129	173295615	IKcKO_specific	1700021F07Rik	52472	TRUE
Foxp3 4342	chr4	42977920	42978161	WT_specific	1700022I11Rik	4657	TRUE
Foxp3 2102	chr11	109720799	109721431	WT_specific	1700023C21Rik	-14239	TRUE
Foxp3 2103	chr11	109721533	109722274	WT_specific	1700023C21Rik	-15082	TRUE
Foxp3 1198	chr1	153866431	153866693	WT_specific	1700025G04Rik	-12796	TRUE
Foxp3 1199	chr1	153931844	153932475	WT_specific	1700025G04Rik	4975	TRUE
Foxp3 186	chr3	105804448	105805036	shared	1700027A23Rik	-621	TRUE
Foxp3 2489	chr13	97753575	97754041	WT_specific	1700029F12Rik	50276	TRUE
Foxp3 1488	chr10	67908288	67908562	WT_specific	1700040L02Rik	79953	TRUE
Foxp3 5917	chr10	68004325	68004597	IKcKO_specific	1700040L02Rik	47	TRUE
Foxp3 5170	chr7	28718103	28718450	WT_specific	1700049G17Rik	-3971	TRUE
Foxp3 1217	chr1	158978671	158978973	WT_specific	1700057K13Rik	59546	TRUE
Foxp3 3629	chr2	9076918	9077194	WT_specific	1700061F12Rik	33948	TRUE
Foxp3 631	chr11	69085216	69086446	shared	1700067G03Rik	21207	TRUE
Foxp3 243	chr4	128709442	128710489	shared	1700086P04Rik	24738	TRUE
Foxp3 244	chr4	128710604	128711132	shared	1700086P04Rik	24095	TRUE
Foxp3 4451	chr4	128711185	128711603	WT_specific	1700086P04Rik	23624	TRUE
Foxp3 4452	chr4	128712133	128713073	WT_specific	1700086P04Rik	22154	TRUE
Foxp3 2193	chr12	36942927	36943338	WT_specific	1700108M19Rik	1451	TRUE
Foxp3 162	chr3	27052868	27053147	shared	1700125G22Rik	-199	TRUE
Foxp3 1499	chr10	76985002	76985565	WT_specific	1810008A18Rik	-7007	TRUE
Foxp3 2936	chr15	100536507	100536892	WT_specific	1810009N23Rik	-10681	TRUE
Foxp3 5155	chr7	13534929	13535899	WT_specific	1810019N24Rik	11218	TRUE
Foxp3 370	chr6	145255226	145256098	shared	2010013B24Rik	-4426	TRUE
Foxp3 4197	chr3	106286495	106287301	WT_specific	2010016I18Rik	-946	TRUE
Foxp3 280	chr5	93635455	93635917	shared	2010109A12Rik	-373	TRUE
Foxp3 2458	chr13	63324305	63324811	WT_specific	2010111I01Rik	49766	TRUE
Foxp3 5990	chr13	63347320	63347884	IKcKO_specific	2010111I01Rik	26693	TRUE
Foxp3 2460	chr13	63348982	63349281	WT_specific	2010111I01Rik	25296	TRUE
Foxp3 2462	chr13	63350343	63350991	WT_specific	2010111I01Rik	23586	TRUE
Foxp3 2463	chr13	63351089	63351582	WT_specific	2010111I01Rik	22995	TRUE
Foxp3 4869	chr6	31236051	31236478	WT_specific	2210408F21Rik	-1474	TRUE
Foxp3 4870	chr6	31236883	31237480	WT_specific	2210408F21Rik	-2476	TRUE
Foxp3 4826	chr5	149490920	149491526	WT_specific	2210417A02Rik	61890	TRUE
Foxp3 6205	chr5	149550601	149551026	IKcKO_specific	2210417A02Rik	2390	TRUE
Foxp3 5087	chr6	129170245	129170523	WT_specific	2310001H17Rik	13469	TRUE
Foxp3 364	chr6	129185524	129186851	shared	2310001H17Rik	1115	TRUE
Foxp3 365	chr6	129187601	129188234	shared	2310001H17Rik	-234	TRUE
Foxp3 3836	chr2	121282844	121283195	WT_specific	2310003F16Rik	-325	TRUE
Foxp3 5863	chr1	60835321	60835752	IKcKO_specific	2310016D23Rik	-65	TRUE
Foxp3 3383	chr18	33115188	33115584	WT_specific	2310026I22Rik	-16708	TRUE
Foxp3 891	chr18	33129280	33130306	shared	2310026I22Rik	-31430	TRUE
Foxp3 4301	chr4	11011715	11012413	WT_specific	2310030N02Rik	-9061	TRUE
Foxp3 4302	chr4	11015505	11016622	WT_specific	2310030N02Rik	-13270	TRUE
Foxp3 206	chr4	11016736	11017933	shared	2310030N02Rik	-14581	TRUE
Foxp3 5261	chr7	90807386	90808542	WT_specific	2310044K18Rik	-457	TRUE
Foxp3 5737	chr9	72937006	72937445	WT_specific	2410004A20Rik	12198	TRUE
Foxp3 4275	chr3	145613103	145613707	WT_specific	2410004B18Rik	-12099	TRUE
Foxp3 4791	chr5	130371404	130371854	WT_specific	2410018M08Rik	-206	TRUE
Foxp3 4928	chr6	54655469	54656024	WT_specific	2410066E13Rik	-24258	TRUE
Foxp3 3891	chr2	153162021	153162363	WT_specific	2500004C02Rik	6594	TRUE
Foxp3 2965	chr16	21728164	21728430	WT_specific	2510009E07Rik	-33692	TRUE
Foxp3 5028	chr6	115544565	115545073	WT_specific	2510049J12Rik	-2479	TRUE
Foxp3 5377	chr8	13986876	13987441	WT_specific	2610019F03Rik	-12409	TRUE
Foxp3 402	chr7	126978835	126979650	shared	2610020H08Rik	-1779	TRUE
Foxp3 1692	chr11	21007006	21007423	WT_specific	2610024D14Rik	-7886	TRUE
Foxp3 2104	chr11	113033694	113034348	WT_specific	2610035D17Rik	43	TRUE
Foxp3 2499	chr13	105367463	105368298	WT_specific	2610204G07Rik	106713	TRUE
Foxp3 2500	chr13	105396864	105397205	WT_specific	2610204G07Rik	77806	TRUE
Foxp3 749	chr13	105411345	105411930	shared	2610204G07Rik	63081	TRUE
Foxp3 750	chr13	105413184	105413818	shared	2610204G07Rik	61193	TRUE
Foxp3 2348	chr12	112797928	112798822	WT_specific	2810029C07Rik	13791	TRUE
Foxp3 3115	chr16	96019854	96020706	WT_specific	2810404F17Rik	9218	TRUE
Foxp3 3116	chr16	96030578	96030931	WT_specific	2810404F17Rik	-1007	TRUE
Foxp3 3117	chr16	96041656	96042178	WT_specific	2810404F17Rik	-12254	TRUE
Foxp3 3118	chr16	96048819	96049249	WT_specific	2810404F17Rik	-19325	TRUE
Foxp3 3454	chr18	82991723	82992325	WT_specific	3010027C24Rik	32961	TRUE
Foxp3 2301	chr12	100560365	100560665	WT_specific	3300002A11Rik	18699	TRUE
Foxp3 543	chr10	59813881	59815336	shared	4632428N05Rik	-3265	TRUE
Foxp3 2322	chr12	106251332	106252229	WT_specific	4831426I19Rik	-4210	TRUE
Foxp3 921	chr19	53535107	53536459	shared	4833407H14Rik	-1338	TRUE
Foxp3 2549	chr13	120251403	120252074	WT_specific	4833420G17Rik	-508	TRUE
Foxp3 5930	chr11	11406492	11406721	IKcKO_specific	4930415F15Rik	-17452	TRUE
Foxp3 1674	chr11	11412151	11412753	WT_specific	4930415F15Rik	-23484	TRUE
Foxp3 1847	chr11	62427559	62427810	WT_specific	4930443B20Rik	-8541	TRUE
Foxp3 3661	chr2	19197708	19198196	WT_specific	4930447M23Rik	67748	TRUE
Foxp3 3060	chr16	64757378	64757902	WT_specific	4930453N24Rik	8580	TRUE
Foxp3 3382	chr18	33040035	33040441	WT_specific	4930455D15Rik	-43500	TRUE
Foxp3 2335	chr12	108969023	108969427	WT_specific	4930465M20Rik	4271	TRUE
Foxp3 3469	chr19	5405735	5406209	WT_specific	4930481A15Rik	531	TRUE
Foxp3 904	chr19	5406725	5407249	shared	4930481A15Rik	-375	TRUE
Foxp3 1520	chr10	85554731	85555025	WT_specific	4930486F22Rik	3605	TRUE
Foxp3 742	chr13	60949524	60949864	shared	4930486L24Rik	15913	TRUE
Foxp3 4828	chr5	149580648	149581266	WT_specific	4930505K14Rik	8273	TRUE
Foxp3 1429	chr10	40091734	40092238	WT_specific	4930520K10Rik	-22191	TRUE
Foxp3 1430	chr10	40106189	40106461	WT_specific	4930520K10Rik	-36414	TRUE
Foxp3 1432	chr10	40139672	40139967	WT_specific	4930520K10Rik	-69920	TRUE
Foxp3 1218	chr1	161954512	161955258	WT_specific	4930523C07Rik	19257	TRUE
Foxp3 1220	chr1	161983361	161983822	WT_specific	4930523C07Rik	-9107	TRUE
Foxp3 1221	chr1	161984044	161984574	WT_specific	4930523C07Rik	-9859	TRUE
Foxp3 1713	chr11	31848384	31848841	WT_specific	4930524B15Rik	16751	TRUE
Foxp3 2299	chr12	92422159	92422431	WT_specific	4930534B04Rik	-219	TRUE
Foxp3 232	chr4	88510220	88510794	shared	4930553M12Rik	3489	TRUE
Foxp3 4398	chr4	88513884	88514222	WT_specific	4930553M12Rik	61	TRUE
Foxp3 1234	chr1	163906074	163906639	WT_specific	4930558K02Rik	3128	TRUE
Foxp3 2930	chr15	98815720	98816493	WT_specific	4930578M01Rik	-97	TRUE
Foxp3 3758	chr2	69616347	69616837	WT_specific	4930578N16Rik	3208	TRUE
Foxp3 5431	chr8	84143162	84143462	WT_specific	4930579O11Rik	47509	TRUE
Foxp3 5432	chr8	84159947	84160333	WT_specific	4930579O11Rik	30638	TRUE
Foxp3 955	chr1	37530318	37530899	WT_specific	4930594C11Rik	14928	TRUE
Foxp3 956	chr1	37534938	37535524	WT_specific	4930594C11Rik	10303	TRUE
Foxp3 3520	chr19	26919703	26920155	WT_specific	4931403E22Rik	-21758	TRUE
Foxp3 3082	chr16	91055925	91057128	WT_specific	4931406G06Rik	-12227	TRUE
Foxp3 3083	chr16	91073542	91073947	WT_specific	4932438H23Rik	-4557	TRUE
Foxp3 5927	chr10	115924184	115924541	IKcKO_specific	4933400F03Rik	-13140	TRUE
Foxp3 1073	chr1	87831803	87832115	WT_specific	4933407L21Rik	-6813	TRUE
Foxp3 4330	chr4	33105433	33105920	WT_specific	4933421O10Rik	12378	TRUE
Foxp3 2276	chr12	81893848	81894148	WT_specific	4933426M11Rik	-2602	TRUE
Foxp3 1582	chr10	111014899	111015783	WT_specific	4933440J02Rik	15546	TRUE
Foxp3 778	chr14	75460574	75460927	shared	5031414D18Rik	-45093	TRUE
Foxp3 2677	chr14	75468352	75469000	WT_specific	5031414D18Rik	-53166	TRUE
Foxp3 4614	chr5	22892456	22893088	WT_specific	5031425E22Rik	46649	TRUE
Foxp3 4010	chr3	51356529	51357230	WT_specific	5031434O11Rik	6449	TRUE
Foxp3 4011	chr3	51357434	51357788	WT_specific	5031434O11Rik	5891	TRUE
Foxp3 4012	chr3	51357868	51358944	WT_specific	5031434O11Rik	4735	TRUE
Foxp3 3525	chr19	29441208	29441494	WT_specific	5033414D02Rik	304	TRUE
Foxp3 3038	chr16	50737338	50737939	WT_specific	5330426P16Rik	-5077	TRUE
Foxp3 1585	chr10	116002356	116002647	WT_specific	5330438D12Rik	15690	TRUE
Foxp3 3224	chr17	36007138	36007470	WT_specific	5530401N12Rik	-3639	TRUE
Foxp3 6237	chr6	143014442	143015001	IKcKO_specific	5730419I09Rik	12170	TRUE
Foxp3 369	chr6	143063322	143064331	shared	5730419I09Rik	-15704	TRUE
Foxp3 3121	chr17	5439774	5440745	WT_specific	5730437N04Rik	-485	TRUE
Foxp3 4288	chr3	153468984	153469699	WT_specific	5730460C07Rik	-14648	TRUE
Foxp3 3580	chr19	53495342	53496001	WT_specific	5830416P10Rik	25803	TRUE
Foxp3 3582	chr19	53498380	53499452	WT_specific	5830416P10Rik	22352	TRUE
Foxp3 3583	chr19	53507819	53508697	WT_specific	5830416P10Rik	13107	TRUE
Foxp3 3584	chr19	53508825	53509349	WT_specific	5830416P10Rik	12455	TRUE
Foxp3 3586	chr19	53517794	53518415	WT_specific	5830416P10Rik	3389	TRUE
Foxp3 922	chr19	53538767	53540280	shared	5830416P10Rik	-994	TRUE
Foxp3 5817	chr9	120492028	120492364	WT_specific	5830454E08Rik	-5901	TRUE
Foxp3 4686	chr5	91017873	91018242	WT_specific	5830473C10Rik	-27998	TRUE
Foxp3 1406	chr10	26078865	26079308	WT_specific	5S_rRNA	-1555	TRUE
Foxp3 4846	chr6	30276252	30276725	WT_specific	5S_rRNA	20741	TRUE
Foxp3 3172	chr17	31203665	31204682	WT_specific	5S_rRNA	-8133	TRUE
Foxp3 3393	chr18	38540813	38541392	WT_specific	5S_rRNA	-25160	TRUE
Foxp3 4072	chr3	69459643	69460019	WT_specific	5S_rRNA	29370	TRUE
Foxp3 3328	chr17	84373095	84373902	WT_specific	5S_rRNA	-26974	TRUE
Foxp3 3329	chr17	84403302	84403893	WT_specific	5S_rRNA	-56965	TRUE
Foxp3 3330	chr17	84421751	84422010	WT_specific	5S_rRNA	-75082	TRUE
Foxp3 1538	chr10	94292058	94292703	WT_specific	5S_rRNA	-8303	TRUE
Foxp3 1539	chr10	94327313	94327714	WT_specific	5S_rRNA	-43314	TRUE
Foxp3 2705	chr14	103205569	103205933	WT_specific	5S_rRNA	-617	TRUE
Foxp3 5475	chr8	117509977	117510274	WT_specific	5S_rRNA	66539	TRUE
Foxp3 6273	chr8	117619614	117619997	IKcKO_specific	5S_rRNA	-43184	TRUE
Foxp3 5476	chr8	117712839	117713470	WT_specific	5S_rRNA	-136657	TRUE
Foxp3 5477	chr8	117713708	117714013	WT_specific	5S_rRNA	-137200	TRUE
Foxp3 5478	chr8	117751483	117751766	WT_specific	5S_rRNA	-174953	TRUE
Foxp3 5479	chr8	117757827	117758334	WT_specific	5S_rRNA	-181521	TRUE
Foxp3 5503	chr8	126152037	126152449	WT_specific	5S_rRNA	-4804	TRUE
Foxp3 5521	chr8	130113149	130113568	WT_specific	5S_rRNA	8038	TRUE
Foxp3 1230	chr1	163544165	163544646	WT_specific	5S_rRNA	-61849	TRUE
Foxp3 4525	chr4	136010876	136011376	WT_specific	6030445D17Rik	6789	TRUE
Foxp3 1298	chr1	182357620	182358258	WT_specific	6330403A02Rik	55340	TRUE
Foxp3 1300	chr1	182362040	182362431	WT_specific	6330403A02Rik	51167	TRUE
Foxp3 4531	chr4	140739596	140739957	WT_specific	6330545A04Rik	29914	TRUE
Foxp3 6121	chr2	72676280	72677013	IKcKO_specific	6430710C18Rik	-25239	TRUE
Foxp3 3129	chr17	12972128	12972631	WT_specific	7SK	-9134	TRUE
Foxp3 855	chr17	12975897	12976313	shared	7SK	-12816	TRUE
Foxp3 1696	chr11	21072307	21072835	WT_specific	7SK	25144	TRUE
Foxp3 599	chr11	21074009	21074788	shared	7SK	23191	TRUE
Foxp3 551	chr10	74909000	74909633	shared	7SK	-4268	TRUE
Foxp3 3316	chr17	80573317	80573812	WT_specific	7SK	21932	TRUE
Foxp3 3317	chr17	80573917	80574708	WT_specific	7SK	21036	TRUE
Foxp3 3318	chr17	80574895	80575559	WT_specific	7SK	20185	TRUE
Foxp3 3076	chr16	84583976	84584255	WT_specific	7SK	36118	TRUE
Foxp3 2292	chr12	88148653	88149159	WT_specific	7SK	1748	TRUE
Foxp3 698	chr12	88175163	88176220	shared	7SK	-25313	TRUE
Foxp3 5922	chr10	94581954	94582219	IKcKO_specific	7SK	-170995	TRUE
Foxp3 4182	chr3	103189018	103190678	WT_specific	7SK	-7024	TRUE
Foxp3 4707	chr5	103947960	103948349	WT_specific	7SK	83257	TRUE
Foxp3 2078	chr11	107726227	107726900	WT_specific	7SK	-38212	TRUE
Foxp3 4220	chr3	121073309	121073761	WT_specific	7SK	-33151	TRUE
Foxp3 441	chr8	123225406	123226571	shared	7SK	15083	TRUE
Foxp3 5485	chr8	123238965	123239309	WT_specific	7SK	2345	TRUE
Foxp3 5486	chr8	123248857	123249304	WT_specific	7SK	-7650	TRUE
Foxp3 5487	chr8	123249652	123250271	WT_specific	7SK	-8617	TRUE
Foxp3 251	chr4	132714601	132715287	shared	7SK	12342	TRUE
Foxp3 252	chr4	132717634	132718487	shared	7SK	9142	TRUE
Foxp3 253	chr4	132725224	132726024	shared	7SK	1605	TRUE
Foxp3 4485	chr4	132726134	132726581	WT_specific	7SK	1048	TRUE
Foxp3 5119	chr6	140463300	140463711	WT_specific	7SK	15773	TRUE
Foxp3 69	chr1	193016971	193018477	shared	7SK	2308	TRUE
Foxp3 4391	chr4	63600389	63600822	WT_specific	8030451A03Rik	40066	TRUE
Foxp3 2307	chr12	102120958	102121765	WT_specific	9030617O03Rik	2325	TRUE
Foxp3 2308	chr12	102121896	102122201	WT_specific	9030617O03Rik	1889	TRUE
Foxp3 1708	chr11	22752371	22753479	WT_specific	9130230N09Rik	5452	TRUE
Foxp3 3955	chr2	167630973	167631534	WT_specific	9230111E07Rik	-23981	TRUE
Foxp3 2783	chr15	57603709	57604488	WT_specific	9330154K18Rik	-35111	TRUE
Foxp3 3680	chr2	30481080	30482082	WT_specific	9330198N18Rik	3093	TRUE
Foxp3 3240	chr17	44850053	44850289	WT_specific	9530072K05Rik	-3118	TRUE
Foxp3 1848	chr11	63797701	63798220	WT_specific	9630013K17Rik	-20492	TRUE
Foxp3 1849	chr11	63798930	63799555	WT_specific	9630013K17Rik	-21827	TRUE
Foxp3 5188	chr7	63223548	63224080	WT_specific	A230056P14Rik	-6179	TRUE
Foxp3 4837	chr6	8435339	8436135	WT_specific	A430035B10Rik	11844	TRUE
Foxp3 1640	chr10	127941655	127942027	WT_specific	A430046D13Rik	-5607	TRUE
Foxp3 417	chr8	3354134	3355973	shared	A430078G23Rik	-2536	TRUE
Foxp3 3491	chr19	10814410	10815511	WT_specific	A430093F15Rik	-74	TRUE
Foxp3 3492	chr19	10815566	10816307	WT_specific	A430093F15Rik	-870	TRUE
Foxp3 908	chr19	10822125	10822879	shared	A430093F15Rik	-7442	TRUE
Foxp3 6084	chr19	10823207	10823743	IKcKO_specific	A430093F15Rik	-8306	TRUE
Foxp3 3493	chr19	10826220	10826963	WT_specific	A430093F15Rik	-11526	TRUE
Foxp3 6085	chr19	10828750	10829101	IKcKO_specific	A430093F15Rik	-13664	TRUE
Foxp3 909	chr19	10837885	10838700	shared	A430093F15Rik	-23263	TRUE
Foxp3 1942	chr11	87561351	87563909	WT_specific	A430104N18Rik	5170	TRUE
Foxp3 643	chr11	87564547	87565909	shared	A430104N18Rik	3170	TRUE
Foxp3 644	chr11	87567602	87568878	shared	A430104N18Rik	201	TRUE
Foxp3 1304	chr1	183157095	183157439	WT_specific	A430110L20Rik	-1232	TRUE
Foxp3 1305	chr1	183157706	183158628	WT_specific	A430110L20Rik	-2421	TRUE
Foxp3 1307	chr1	183160715	183161202	WT_specific	A430110L20Rik	-4995	TRUE
Foxp3 1308	chr1	183161333	183161562	WT_specific	A430110L20Rik	-5355	TRUE
Foxp3 1309	chr1	183161997	183163031	WT_specific	A430110L20Rik	-6824	TRUE
Foxp3 1069	chr1	87632972	87633227	WT_specific	A630001G21Rik	-91	TRUE
Foxp3 1070	chr1	87636554	87637138	WT_specific	A630001G21Rik	-3934	TRUE
Foxp3 1789	chr11	52088908	52089540	WT_specific	A630014C17Rik	17	TRUE
Foxp3 4738	chr5	110943419	110943720	WT_specific	A630023P12Rik	222	TRUE
Foxp3 2958	chr16	10843577	10844080	WT_specific	A630055G03Rik	-8928	TRUE
Foxp3 830	chr16	10844569	10845628	shared	A630055G03Rik	-10476	TRUE
Foxp3 5272	chr7	105711663	105712127	WT_specific	A630091E08Rik	-629	TRUE
Foxp3 395	chr7	105727865	105729237	shared	A630091E08Rik	-17739	TRUE
Foxp3 5273	chr7	105731421	105731969	WT_specific	A630091E08Rik	-20471	TRUE
Foxp3 4122	chr3	94800758	94801062	WT_specific	A730011C13Rik	-144	TRUE
Foxp3 3380	chr18	32557938	32558717	WT_specific	A830052D11Rik	-20779	TRUE
Foxp3 4200	chr3	106878767	106879075	WT_specific	A930002I21Rik	14805	TRUE
Foxp3 4201	chr3	106879256	106879548	WT_specific	A930002I21Rik	14332	TRUE
Foxp3 192	chr3	115504215	115504942	shared	A930005H10Rik	86106	TRUE
Foxp3 193	chr3	115517640	115519678	shared	A930005H10Rik	71370	TRUE
Foxp3 3086	chr16	91442674	91443830	WT_specific	A930006K02Rik	21519	TRUE
Foxp3 3087	chr16	91445541	91447117	WT_specific	A930006K02Rik	18232	TRUE
Foxp3 3088	chr16	91447208	91447694	WT_specific	A930006K02Rik	17655	TRUE
Foxp3 3089	chr16	91458403	91459019	WT_specific	A930006K02Rik	6330	TRUE
Foxp3 3092	chr16	91470581	91470871	WT_specific	A930006K02Rik	-5522	TRUE
Foxp3 915	chr19	29541336	29541930	shared	A930007I19Rik	54549	TRUE
Foxp3 3529	chr19	29575474	29575895	WT_specific	A930007I19Rik	20584	TRUE
Foxp3 6199	chr5	123439112	123439502	IKcKO_specific	A930024E05Rik	-139	TRUE
Foxp3 4944	chr6	65612037	65612505	WT_specific	A930038C07Rik	9079	TRUE
Foxp3 6217	chr6	86821629	86822166	IKcKO_specific	Aak1	-20987	TRUE
Foxp3 4867	chr6	31141420	31142276	WT_specific	AB041803	26157	TRUE
Foxp3 4868	chr6	31159849	31160536	WT_specific	AB041803	7897	TRUE
Foxp3 5952	chr11	94247533	94248060	IKcKO_specific	Abcc3	6174	TRUE
Foxp3 2220	chr12	71237015	71237539	WT_specific	Abhd12b	17590	TRUE
Foxp3 2221	chr12	71249034	71249453	WT_specific	Abhd12b	5676	TRUE
Foxp3 1882	chr11	77331847	77332465	WT_specific	Abhd15	-345	TRUE
Foxp3 6106	chr2	22903885	22904193	IKcKO_specific	Abi1	-8432	TRUE
Foxp3 3596	chr19	57147500	57147897	WT_specific	Ablim1	-26169	TRUE
Foxp3 3597	chr19	57148143	57148666	WT_specific	Ablim1	-26938	TRUE
Foxp3 3599	chr19	57188456	57188771	WT_specific	Ablim1	4632	TRUE
Foxp3 3600	chr19	57191353	57192581	WT_specific	Ablim1	822	TRUE
Foxp3 3601	chr19	57193060	57193674	WT_specific	Ablim1	-160	TRUE
Foxp3 3602	chr19	57197559	57199287	WT_specific	Ablim1	-5773	TRUE
Foxp3 925	chr19	57205934	57207041	shared	Ablim1	2126	TRUE
Foxp3 3603	chr19	57207202	57207910	WT_specific	Ablim1	1257	TRUE
Foxp3 1878	chr11	76292389	76293935	WT_specific	Abr	-11968	TRUE
Foxp3 3815	chr2	103469234	103469800	WT_specific	Abtb2	-63333	TRUE
Foxp3 6129	chr2	103472586	103472959	IKcKO_specific	Abtb2	-66492	TRUE
Foxp3 3816	chr2	103478760	103479012	WT_specific	Abtb2	-72545	TRUE
Foxp3 130	chr2	103497199	103498491	shared	Abtb2	56701	TRUE
Foxp3 3817	chr2	103522393	103522817	WT_specific	Abtb2	32375	TRUE
Foxp3 899	chr18	65574535	65575022	shared	AC102240.1	12101	TRUE
Foxp3 2166	chr12	16013386	16013855	WT_specific	AC102435.1	183302	TRUE
Foxp3 2167	chr12	16140124	16140391	WT_specific	AC102435.1	56766	TRUE
Foxp3 5311	chr7	121460646	121461383	WT_specific	AC103388.1	9454	TRUE
Foxp3 4234	chr3	130700078	130700368	WT_specific	AC114668.1	102098	TRUE
Foxp3 4235	chr3	130721591	130722085	WT_specific	AC114668.1	80381	TRUE
Foxp3 4236	chr3	130722160	130722665	WT_specific	AC114668.1	79801	TRUE
Foxp3 5507	chr8	129021600	129022235	WT_specific	AC118255.1	5103	TRUE
Foxp3 5168	chr7	26611889	26612275	WT_specific	AC119211.1	1471	TRUE
Foxp3 878	chr17	52301789	52302297	shared	AC121600.1	242065	TRUE
Foxp3 5501	chr8	125538391	125538648	WT_specific	AC121819.1	9947	TRUE
Foxp3 6276	chr8	125556569	125556912	IKcKO_specific	AC121819.1	-8317	TRUE
Foxp3 3079	chr16	89907187	89907422	WT_specific	AC122218.1	-117	TRUE
Foxp3 3141	chr17	26708435	26708972	WT_specific	AC122252.1	8900	TRUE
Foxp3 3142	chr17	26731166	26731542	WT_specific	AC122252.1	-13670	TRUE
Foxp3 3143	chr17	26731667	26731982	WT_specific	AC122252.1	-14110	TRUE
Foxp3 3144	chr17	26732078	26732777	WT_specific	AC122252.1	-14905	TRUE
Foxp3 6262	chr7	134309547	134309929	IKcKO_specific	AC122537.1	24612	TRUE
Foxp3 5343	chr7	134323858	134324925	WT_specific	AC122537.1	9616	TRUE
Foxp3 408	chr7	134331581	134332952	shared	AC122537.1	1589	TRUE
Foxp3 3557	chr19	44357092	44357640	WT_specific	AC123853.1	2140	TRUE
Foxp3 1177	chr1	138595377	138595835	WT_specific	AC125186.1	-1884	TRUE
Foxp3 1455	chr10	62005754	62007192	WT_specific	AC126428.1	13748	TRUE
Foxp3 1456	chr10	62016406	62017111	WT_specific	AC126428.1	3829	TRUE
Foxp3 2433	chr13	51858464	51859076	WT_specific	AC126547.1	1587	TRUE
Foxp3 737	chr13	51862527	51864350	shared	AC126547.1	-3687	TRUE
Foxp3 6013	chr14	78756136	78756559	IKcKO_specific	AC126690.2	-45412	TRUE
Foxp3 559	chr10	95643229	95644783	shared	AC131596.1	-17818	TRUE
Foxp3 1544	chr10	95663980	95664493	WT_specific	AC131596.1	-37528	TRUE
Foxp3 1546	chr10	95727505	95727825	WT_specific	AC131596.1	-100860	TRUE
Foxp3 1548	chr10	95787735	95788197	WT_specific	AC131596.1	-161232	TRUE
Foxp3 560	chr10	95833244	95834685	shared	AC131596.1	-207720	TRUE
Foxp3 561	chr10	95835775	95838010	shared	AC131596.1	-211045	TRUE
Foxp3 1138	chr1	129241385	129242283	WT_specific	AC131793.1	-13894	TRUE
Foxp3 3488	chr19	10012493	10013850	WT_specific	AC132253.2	-31202	TRUE
Foxp3 4097	chr3	89103299	89103892	WT_specific	AC132327.1	2512	TRUE
Foxp3 2261	chr12	78160921	78161418	WT_specific	AC133174.1	56001	TRUE
Foxp3 2263	chr12	78231334	78231847	WT_specific	AC133174.1	-14428	TRUE
Foxp3 2810	chr15	62289743	62290117	WT_specific	AC134453.1	194442	TRUE
Foxp3 505	chr9	107937186	107938129	shared	AC137678.1	-2952	TRUE
Foxp3 19	chr1	82827291	82829220	shared	AC138214.1	6801	TRUE
Foxp3 1064	chr1	82829346	82829926	WT_specific	AC138214.1	6095	TRUE
Foxp3 1065	chr1	82830134	82830433	WT_specific	AC138214.1	5588	TRUE
Foxp3 1066	chr1	82831013	82831464	WT_specific	AC138214.1	4557	TRUE
Foxp3 1008	chr1	54898508	54898996	WT_specific	AC151572.1	-72934	TRUE
Foxp3 5463	chr8	108334218	108334653	WT_specific	AC152826.1	5844	TRUE
Foxp3 5464	chr8	108334900	108335277	WT_specific	AC152826.1	5220	TRUE
Foxp3 1392	chr10	20916425	20916799	WT_specific	AC153556.1	28897	TRUE
Foxp3 1393	chr10	20920485	20920964	WT_specific	AC153556.1	24732	TRUE
Foxp3 1394	chr10	20942452	20942923	WT_specific	AC153556.1	2773	TRUE
Foxp3 1395	chr10	20944628	20945298	WT_specific	AC153556.1	398	TRUE
Foxp3 685	chr12	70575750	70576725	shared	AC153658.1	85599	TRUE
Foxp3 2212	chr12	70602664	70603309	WT_specific	AC153658.1	59015	TRUE
Foxp3 2214	chr12	70617278	70618031	WT_specific	AC153658.1	44293	TRUE
Foxp3 2215	chr12	70638185	70640364	WT_specific	AC153658.1	21960	TRUE
Foxp3 2581	chr14	28189392	28189796	WT_specific	AC154327.1	4240	TRUE
Foxp3 2582	chr14	28197436	28197805	WT_specific	AC154327.1	-3769	TRUE
Foxp3 2585	chr14	28215689	28216353	WT_specific	AC154327.1	-22317	TRUE
Foxp3 4972	chr6	86519372	86519946	WT_specific	AC158662.1	4209	TRUE
Foxp3 4973	chr6	86543177	86543625	WT_specific	AC158662.1	-19470	TRUE
Foxp3 4974	chr6	86543825	86544280	WT_specific	AC158662.1	-20125	TRUE
Foxp3 5229	chr7	82883933	82884519	WT_specific	AC158749.1	17735	TRUE
Foxp3 5231	chr7	82932507	82933446	WT_specific	AC158749.1	-31192	TRUE
Foxp3 388	chr7	82939910	82940439	shared	AC158749.1	-38185	TRUE
Foxp3 389	chr7	82941168	82941734	shared	AC158749.1	-39480	TRUE
Foxp3 5234	chr7	82944806	82945448	WT_specific	AC158749.1	-43194	TRUE
Foxp3 5235	chr7	82945794	82946556	WT_specific	AC158749.1	-44302	TRUE
Foxp3 5658	chr9	48346795	48347300	WT_specific	AC160992.1	-32135	TRUE
Foxp3 1071	chr1	87645438	87649530	WT_specific	AC161342.1	10839	TRUE
Foxp3 5240	chr7	87285849	87286258	WT_specific	AC164075.1	11507	TRUE
Foxp3 2506	chr13	108628359	108628677	WT_specific	AC165250.1	-9208	TRUE
Foxp3 2985	chr16	31191982	31192706	WT_specific	Acap2	8371	TRUE
Foxp3 230	chr4	86531396	86532486	shared	Acer2	-12168	TRUE
Foxp3 4419	chr4	106467069	106467637	WT_specific	Acot11	4758	TRUE
Foxp3 4420	chr4	106467829	106468425	WT_specific	Acot11	3970	TRUE
Foxp3 4579	chr4	151571608	151572000	WT_specific	Acot7	1919	TRUE
Foxp3 3845	chr2	127742602	127742927	WT_specific	Acoxl	-8133	TRUE
Foxp3 3846	chr2	127753174	127753677	WT_specific	Acoxl	-18883	TRUE
Foxp3 3808	chr2	91042626	91043413	WT_specific	Acp2	-328	TRUE
Foxp3 5665	chr9	54490095	54490466	WT_specific	Acsbg1	499	TRUE
Foxp3 4810	chr5	143692695	143693344	WT_specific	Actb	-24911	TRUE
Foxp3 4811	chr5	143693811	143694255	WT_specific	Actb	-25822	TRUE
Foxp3 951	chr1	36779794	36780722	WT_specific	Actr1b	-9455	TRUE
Foxp3 28	chr1	127363463	127363835	shared	Actr3	-31768	TRUE
Foxp3 1129	chr1	127364083	127364556	WT_specific	Actr3	-32489	TRUE
Foxp3 553	chr10	89194626	89195352	shared	Actr6	-312	TRUE
Foxp3 1743	chr11	45887420	45887935	WT_specific	Adam19	-18348	TRUE
Foxp3 1744	chr11	45889751	45890064	WT_specific	Adam19	-20477	TRUE
Foxp3 1745	chr11	45897625	45898335	WT_specific	Adam19	-28748	TRUE
Foxp3 1746	chr11	45900078	45900771	WT_specific	Adam19	-31184	TRUE
Foxp3 1747	chr11	45904476	45904929	WT_specific	Adam19	-35342	TRUE
Foxp3 748	chr13	105076789	105077480	shared	Adamts6	473	TRUE
Foxp3 177	chr3	95471533	95472930	shared	Adamtsl4	8144	TRUE
Foxp3 178	chr3	95473149	95473960	shared	Adamtsl4	7114	TRUE
Foxp3 179	chr3	95476023	95478157	shared	Adamtsl4	2917	TRUE
Foxp3 4136	chr3	95478748	95479799	WT_specific	Adamtsl4	1275	TRUE
Foxp3 4804	chr5	139779869	139780457	WT_specific	Adap1	-1436	TRUE
Foxp3 4101	chr3	89534704	89535079	WT_specific	Adar	-409	TRUE
Foxp3 6215	chr6	86076990	86077208	IKcKO_specific	Add2	-49130	TRUE
Foxp3 4264	chr3	138086931	138087288	WT_specific	Adh4	-8829	TRUE
Foxp3 902	chr18	80366243	80366845	shared	Adnp2	-18624	TRUE
Foxp3 550	chr10	74763031	74763659	shared	Adora2a	16029	TRUE
Foxp3 4194	chr3	105694982	105695819	WT_specific	Adora3	11522	TRUE
Foxp3 4195	chr3	105713348	105714113	WT_specific	Adora3	-6772	TRUE
Foxp3 3465	chr19	4299900	4301044	WT_specific	Adrbk1	4164	TRUE
Foxp3 368	chr6	140562181	140563605	shared	Aebp2	7365	TRUE
Foxp3 284	chr5	104189415	104190065	shared	Aff1	-6473	TRUE
Foxp3 957	chr1	38714370	38715346	WT_specific	Aff3	6454	TRUE
Foxp3 959	chr1	38721154	38722050	WT_specific	Aff3	-250	TRUE
Foxp3 4219	chr3	116538720	116539560	WT_specific	Agl	-28476	TRUE
Foxp3 1507	chr10	77761102	77762369	WT_specific	Agpat3	-1426	TRUE
Foxp3 304	chr6	29803096	29804420	shared	Ahcyl2	-529	TRUE
Foxp3 1388	chr10	20626908	20627172	WT_specific	Ahi1	45219	TRUE
Foxp3 907	chr19	9071687	9072807	shared	Ahnak	1343	TRUE
Foxp3 3484	chr19	9073165	9073705	WT_specific	Ahnak	445	TRUE
Foxp3 5338	chr7	134233015	134233289	WT_specific	AI467606	1661	TRUE
Foxp3 2984	chr16	31040181	31040488	WT_specific	AI480653	21025	TRUE
Foxp3 1920	chr11	83036979	83037764	WT_specific	AI662270	-113	TRUE
Foxp3 1921	chr11	83038093	83038916	WT_specific	AI662270	-1265	TRUE
Foxp3 3862	chr2	129005730	129006003	WT_specific	AI847159	365	TRUE
Foxp3 378	chr7	48648366	48648765	shared	AI987944	-135	TRUE
Foxp3 3207	chr17	35309747	35310361	WT_specific	Aif1	-138	TRUE
Foxp3 1356	chr10	13552655	13553325	WT_specific	Aig1	10767	TRUE
Foxp3 1443	chr10	43716869	43717596	WT_specific	Aim1	364	TRUE
Foxp3 1444	chr10	43788861	43789378	WT_specific	Aim1	-64726	TRUE
Foxp3 1280	chr1	175367096	175367614	WT_specific	Aim2	15341	TRUE
Foxp3 5894	chr1	175371377	175371770	IKcKO_specific	Aim2	11185	TRUE
Foxp3 3462	chr19	4120092	4120918	WT_specific	Aip	657	TRUE
Foxp3 4450	chr4	128658447	128659351	WT_specific	Ak2	9851	TRUE
Foxp3 6174	chr4	128686033	128686238	IKcKO_specific	Ak2	-15641	TRUE
Foxp3 784	chr14	78831677	78832867	shared	Akap11	103748	TRUE
Foxp3 2690	chr14	78834689	78835367	WT_specific	Akap11	101248	TRUE
Foxp3 785	chr14	78835402	78835996	shared	Akap11	100619	TRUE
Foxp3 2691	chr14	78836511	78837179	WT_specific	Akap11	99436	TRUE
Foxp3 5218	chr7	82532985	82533630	WT_specific	Akap13	66790	TRUE
Foxp3 5219	chr7	82542179	82542672	WT_specific	Akap13	57748	TRUE
Foxp3 5220	chr7	82543983	82544213	WT_specific	Akap13	56207	TRUE
Foxp3 5221	chr7	82716423	82717259	WT_specific	Akap13	37666	TRUE
Foxp3 5222	chr7	82730943	82731462	WT_specific	Akap13	23463	TRUE
Foxp3 385	chr7	82754064	82755155	shared	Akap13	-86	TRUE
Foxp3 5225	chr7	82755289	82756416	WT_specific	Akap13	-427	TRUE
Foxp3 386	chr7	82756831	82757463	shared	Akap13	-293	TRUE
Foxp3 5226	chr7	82787274	82787614	WT_specific	Akap13	591	TRUE
Foxp3 387	chr7	82846755	82847255	shared	Akap13	-291	TRUE
Foxp3 4368	chr4	57743554	57743993	WT_specific	Akap2	10974	TRUE
Foxp3 3190	chr17	32485799	32486480	WT_specific	Akap8l	1046	TRUE
Foxp3 4382	chr4	63061875	63062315	WT_specific	Akna	2073	TRUE
Foxp3 4384	chr4	63065102	63066602	WT_specific	Akna	-2123	TRUE
Foxp3 3931	chr2	165739841	165740526	WT_specific	AL589902.1	-6851	TRUE
Foxp3 3919	chr2	162928573	162928999	WT_specific	AL591584.1	-10364	TRUE
Foxp3 3930	chr2	165617956	165618737	WT_specific	AL591712.1	16643	TRUE
Foxp3 1926	chr11	85738795	85739266	WT_specific	AL592465.1	-5786	TRUE
Foxp3 1936	chr11	86706914	86708105	WT_specific	AL596111.1	-70411	TRUE
Foxp3 145	chr2	158544658	158545555	shared	AL663077.1	20319	TRUE
Foxp3 3912	chr2	158548475	158549001	WT_specific	AL663077.1	16873	TRUE
Foxp3 146	chr2	158549079	158550048	shared	AL663077.1	15826	TRUE
Foxp3 3913	chr2	158559532	158559971	WT_specific	AL663077.1	5903	TRUE
Foxp3 2159	chr11	120776964	120777740	WT_specific	AL663090.1	-3169	TRUE
Foxp3 1781	chr11	51745056	51745726	WT_specific	AL669920.1	32158	TRUE
Foxp3 4002	chr3	37182263	37182570	WT_specific	AL691478.1	-26755	TRUE
Foxp3 3883	chr2	152600712	152601672	WT_specific	AL731857.1	-3047	TRUE
Foxp3 3884	chr2	152612985	152613968	WT_specific	AL731857.1	-15343	TRUE
Foxp3 3885	chr2	152614204	152616284	WT_specific	AL731857.1	-17659	TRUE
Foxp3 3886	chr2	152619797	152620511	WT_specific	AL731857.1	-21886	TRUE
Foxp3 3943	chr2	166481172	166481782	WT_specific	AL732357.1	-1140	TRUE
Foxp3 3944	chr2	166491071	166492320	WT_specific	AL732357.1	-11678	TRUE
Foxp3 4529	chr4	138886649	138887092	WT_specific	AL807811.1	7029	TRUE
Foxp3 4757	chr5	122014550	122014926	WT_specific	Aldh2	10210	TRUE
Foxp3 1859	chr11	70110911	70111982	WT_specific	Alox12e	23097	TRUE
Foxp3 898	chr18	65541035	65541944	shared	Alpk2	11598	TRUE
Foxp3 3425	chr18	65555618	65556311	WT_specific	Alpk2	-2769	TRUE
Foxp3 5784	chr9	110809722	110810047	WT_specific	Als2cl	-19548	TRUE
Foxp3 5785	chr9	110810340	110810736	WT_specific	Als2cl	-20237	TRUE
Foxp3 5646	chr9	44887253	44888165	WT_specific	Amica1	-899	TRUE
Foxp3 477	chr9	44890825	44891245	shared	Amica1	-3979	TRUE
Foxp3 5648	chr9	44891672	44892066	WT_specific	Amica1	-4800	TRUE
Foxp3 2916	chr15	97180936	97181389	WT_specific	Amigo2	-103671	TRUE
Foxp3 2917	chr15	97191198	97192431	WT_specific	Amigo2	-114713	TRUE
Foxp3 2918	chr15	97192579	97193255	WT_specific	Amigo2	-115537	TRUE
Foxp3 2919	chr15	97203202	97203550	WT_specific	Amigo2	-125832	TRUE
Foxp3 822	chr15	97203783	97204186	shared	Amigo2	-126468	TRUE
Foxp3 2920	chr15	97204857	97205196	WT_specific	Amigo2	-127478	TRUE
Foxp3 2921	chr15	97254721	97255673	WT_specific	Amigo2	-177955	TRUE
Foxp3 2922	chr15	97298784	97299191	WT_specific	Amigo2	-221473	TRUE
Foxp3 823	chr15	97299270	97301144	shared	Amigo2	-223426	TRUE
Foxp3 5151	chr6	149141944	149142302	WT_specific	Amn1	-5068	TRUE
Foxp3 664	chr11	109280854	109282259	shared	Amz2	5001	TRUE
Foxp3 2095	chr11	109293629	109294095	WT_specific	Amz2	-65	TRUE
Foxp3 2096	chr11	109295554	109296166	WT_specific	Amz2	-860	TRUE
Foxp3 492	chr9	65389142	65390064	shared	Ankdd1a	-25258	TRUE
Foxp3 2486	chr13	97201629	97202051	WT_specific	Ankdd1b	39064	TRUE
Foxp3 5371	chr8	11625589	11625838	WT_specific	Ankrd10	9916	TRUE
Foxp3 5490	chr8	125441316	125442910	WT_specific	Ankrd11	55763	TRUE
Foxp3 5491	chr8	125461627	125462452	WT_specific	Ankrd11	36221	TRUE
Foxp3 5492	chr8	125463138	125463398	WT_specific	Ankrd11	35275	TRUE
Foxp3 5493	chr8	125477025	125477316	WT_specific	Ankrd11	21357	TRUE
Foxp3 1881	chr11	77297136	77297384	WT_specific	Ankrd13b	5784	TRUE
Foxp3 2589	chr14	32594595	32594937	WT_specific	Ankrd28	48664	TRUE
Foxp3 1010	chr1	54927672	54927958	WT_specific	Ankrd44	55273	TRUE
Foxp3 5856	chr1	54953346	54953621	IKcKO_specific	Ankrd44	29610	TRUE
Foxp3 1012	chr1	54954591	54955124	WT_specific	Ankrd44	28107	TRUE
Foxp3 1014	chr1	54963524	54965017	WT_specific	Ankrd44	18214	TRUE
Foxp3 1015	chr1	54965789	54966234	WT_specific	Ankrd44	16997	TRUE
Foxp3 1016	chr1	54969139	54970063	WT_specific	Ankrd44	13168	TRUE
Foxp3 1017	chr1	54970304	54970611	WT_specific	Ankrd44	12620	TRUE
Foxp3 6029	chr15	36388165	36388435	IKcKO_specific	Ankrd46	38111	TRUE
Foxp3 2520	chr13	113078295	113079237	WT_specific	Ankrd55	-511	TRUE
Foxp3 2521	chr13	113079506	113079996	WT_specific	Ankrd55	-1270	TRUE
Foxp3 2524	chr13	113175639	113175974	WT_specific	Ankrd55	-67312	TRUE
Foxp3 2525	chr13	113178036	113178416	WT_specific	Ankrd55	-69754	TRUE
Foxp3 5823	chr9	122141653	122142408	WT_specific	Ano10	61084	TRUE
Foxp3 5824	chr9	122142633	122143038	WT_specific	Ano10	60454	TRUE
Foxp3 485	chr9	62197106	62198341	shared	Anp32a	-5735	TRUE
Foxp3 5689	chr9	62200849	62202258	WT_specific	Anp32a	-9652	TRUE
Foxp3 486	chr9	62216392	62216865	shared	Anp32a	-2114	TRUE
Foxp3 4348	chr4	46471083	46471475	WT_specific	Anp32b	-7476	TRUE
Foxp3 2560	chr14	26676689	26677239	WT_specific	Anxa11	-15570	TRUE
Foxp3 6216	chr6	86756680	86757039	IKcKO_specific	Anxa4	-13461	TRUE
Foxp3 1814	chr11	54836891	54837417	WT_specific	Anxa6	9500	TRUE
Foxp3 5417	chr8	74796347	74796747	WT_specific	Ap1m1	-19913	TRUE
Foxp3 5418	chr8	74800800	74801386	WT_specific	Ap1m1	-24552	TRUE
Foxp3 5549	chr9	21126663	21127078	WT_specific	Ap1m2	-10301	TRUE
Foxp3 2558	chr14	21851135	21851517	WT_specific	Ap3m1	2271	TRUE
Foxp3 5453	chr8	96932403	96932968	WT_specific	Ap3s1-ps2	-3960	TRUE
Foxp3 5455	chr8	96936896	96937196	WT_specific	Ap3s1-ps2	-8188	TRUE
Foxp3 5456	chr8	96937263	96937549	WT_specific	Ap3s1-ps2	-8541	TRUE
Foxp3 5457	chr8	96937672	96938273	WT_specific	Ap3s1-ps2	-9265	TRUE
Foxp3 5458	chr8	96941787	96942314	WT_specific	Ap3s1-ps2	-13306	TRUE
Foxp3 4803	chr5	138613350	138613854	WT_specific	Ap4m1	-44	TRUE
Foxp3 6104	chr2	22639353	22640102	IKcKO_specific	Apbb1ip	-10137	TRUE
Foxp3 6105	chr2	22666426	22666751	IKcKO_specific	Apbb1ip	-36786	TRUE
Foxp3 5050	chr6	122552242	122552929	WT_specific	Apobec1	-547	TRUE
Foxp3 3252	chr17	48565250	48565767	WT_specific	Apobec2	6286	TRUE
Foxp3 2872	chr15	79722005	79722645	WT_specific	Apobec3	-157	TRUE
Foxp3 2873	chr15	79723672	79724252	WT_specific	Apobec3	-1285	TRUE
Foxp3 2875	chr15	79725311	79726156	WT_specific	Apobec3	-465	TRUE
Foxp3 2876	chr15	79726372	79727361	WT_specific	Apobec3	-1670	TRUE
Foxp3 2877	chr15	79730730	79731482	WT_specific	Apobec3	-850	TRUE
Foxp3 2086	chr11	108134302	108135159	WT_specific	Apoh	69509	TRUE
Foxp3 2087	chr11	108135333	108135752	WT_specific	Apoh	68916	TRUE
Foxp3 2088	chr11	108143981	108144553	WT_specific	Apoh	60115	TRUE
Foxp3 2860	chr15	77563765	77564185	WT_specific	Apol9b	-4634	TRUE
Foxp3 2505	chr13	108358331	108358602	WT_specific	Apoo-ps	-153785	TRUE
Foxp3 4335	chr4	40649767	40650505	WT_specific	Aptx	-285	TRUE
Foxp3 393	chr7	104897138	104898207	shared	Aqp11	-11450	TRUE
Foxp3 3822	chr2	113970640	113971221	WT_specific	Aqr	-4342	TRUE
Foxp3 3725	chr2	43593381	43593650	WT_specific	Arhgap15	10694	TRUE
Foxp3 108	chr2	43593900	43594841	shared	Arhgap15	9503	TRUE
Foxp3 1407	chr10	26472563	26473376	WT_specific	Arhgap18	-149	TRUE
Foxp3 536	chr10	26519411	26520010	shared	Arhgap18	22398	TRUE
Foxp3 332	chr6	87452382	87453453	shared	Arhgap25	-7145	TRUE
Foxp3 6218	chr6	87453753	87454228	IKcKO_specific	Arhgap25	-7920	TRUE
Foxp3 4977	chr6	87463079	87463913	WT_specific	Arhgap25	-17605	TRUE
Foxp3 333	chr6	87482483	87483300	shared	Arhgap25	-47	TRUE
Foxp3 334	chr6	87484993	87485636	shared	Arhgap25	-2383	TRUE
Foxp3 6219	chr6	87485775	87486053	IKcKO_specific	Arhgap25	-2800	TRUE
Foxp3 335	chr6	87486207	87487625	shared	Arhgap25	-4372	TRUE
Foxp3 336	chr6	87491894	87492428	shared	Arhgap25	-9175	TRUE
Foxp3 4978	chr6	87497653	87498182	WT_specific	Arhgap25	-14929	TRUE
Foxp3 3396	chr18	39242146	39242628	WT_specific	Arhgap26	16337	TRUE
Foxp3 3397	chr18	39243505	39243865	WT_specific	Arhgap26	15100	TRUE
Foxp3 367	chr6	136889190	136890615	shared	Arhgdib	-195	TRUE
Foxp3 5115	chr6	136895503	136895741	WT_specific	Arhgdib	-5321	TRUE
Foxp3 419	chr8	14985286	14986296	shared	Arhgef10	4063	TRUE
Foxp3 5379	chr8	14993858	14994215	WT_specific	Arhgef10	1921	TRUE
Foxp3 5380	chr8	14994326	14994707	WT_specific	Arhgef10	1429	TRUE
Foxp3 2563	chr14	28005641	28006102	WT_specific	Arhgef3	45123	TRUE
Foxp3 2564	chr14	28041854	28043792	WT_specific	Arhgef3	7433	TRUE
Foxp3 2565	chr14	28047349	28047748	WT_specific	Arhgef3	3477	TRUE
Foxp3 2567	chr14	28049168	28049867	WT_specific	Arhgef3	1358	TRUE
Foxp3 2568	chr14	28050895	28051772	WT_specific	Arhgef3	-547	TRUE
Foxp3 2569	chr14	28052656	28053318	WT_specific	Arhgef3	-2093	TRUE
Foxp3 2571	chr14	28062858	28063261	WT_specific	Arhgef3	-12036	TRUE
Foxp3 2574	chr14	28154360	28154657	WT_specific	Arhgef3	-5386	TRUE
Foxp3 2575	chr14	28154748	28155051	WT_specific	Arhgef3	-5780	TRUE
Foxp3 2576	chr14	28158339	28159135	WT_specific	Arhgef3	-9864	TRUE
Foxp3 2579	chr14	28164228	28164883	WT_specific	Arhgef3	-15612	TRUE
Foxp3 762	chr14	28168585	28169486	shared	Arhgef3	-20215	TRUE
Foxp3 2580	chr14	28171309	28171663	WT_specific	Arhgef3	-22392	TRUE
Foxp3 3319	chr17	80722991	80723275	WT_specific	Arhgef33	-16528	TRUE
Foxp3 3418	chr18	61649032	61649651	WT_specific	Arhgef37	19282	TRUE
Foxp3 4491	chr4	133262535	133263323	WT_specific	Arid1a	13368	TRUE
Foxp3 255	chr4	133285422	133286286	shared	Arid1a	-6492	TRUE
Foxp3 4493	chr4	133302463	133302752	WT_specific	Arid1a	6774	TRUE
Foxp3 946	chr1	36350080	36350581	WT_specific	Arid5a	13997	TRUE
Foxp3 947	chr1	36350845	36351377	WT_specific	Arid5a	13201	TRUE
Foxp3 948	chr1	36353118	36353561	WT_specific	Arid5a	11017	TRUE
Foxp3 949	chr1	36353732	36354284	WT_specific	Arid5a	10294	TRUE
Foxp3 2	chr1	36366038	36366610	shared	Arid5a	-1986	TRUE
Foxp3 1479	chr10	67600477	67600761	WT_specific	Arid5b	-1387	TRUE
Foxp3 5914	chr10	67631155	67631394	IKcKO_specific	Arid5b	-32020	TRUE
Foxp3 1482	chr10	67701186	67701731	WT_specific	Arid5b	39743	TRUE
Foxp3 5916	chr10	67701936	67702572	IKcKO_specific	Arid5b	38902	TRUE
Foxp3 1483	chr10	67702623	67703079	WT_specific	Arid5b	38395	TRUE
Foxp3 549	chr10	67703952	67704304	shared	Arid5b	37170	TRUE
Foxp3 1484	chr10	67711294	67711609	WT_specific	Arid5b	29865	TRUE
Foxp3 1485	chr10	67712266	67712642	WT_specific	Arid5b	28832	TRUE
Foxp3 1487	chr10	67819947	67820345	WT_specific	Arid5b	-78871	TRUE
Foxp3 4067	chr3	68981263	68981691	WT_specific	Arl14	44650	TRUE
Foxp3 4068	chr3	69009358	69009955	WT_specific	Arl14	16386	TRUE
Foxp3 2540	chr13	114659775	114660240	WT_specific	Arl15	-75410	TRUE
Foxp3 1095	chr1	90550974	90553553	WT_specific	Arl4c	44898	TRUE
Foxp3 1096	chr1	90605318	90605730	WT_specific	Arl4c	-6934	TRUE
Foxp3 89	chr2	14970650	14971147	shared	Arl5b	-125	TRUE
Foxp3 1975	chr11	97860964	97861390	WT_specific	Arl5c	-3895	TRUE
Foxp3 4988	chr6	97171538	97172633	WT_specific	Arl6ip5	-11950	TRUE
Foxp3 1436	chr10	41657130	41657385	WT_specific	Armc2	38543	TRUE
Foxp3 5149	chr6	146725144	146725413	WT_specific	Arntl2	19164	TRUE
Foxp3 6202	chr5	145830268	145830969	IKcKO_specific	Arpc1a	13730	TRUE
Foxp3 1057	chr1	74296214	74296496	WT_specific	Arpc2	-13372	TRUE
Foxp3 2099	chr11	109406714	109407210	WT_specific	Arsg	-2142	TRUE
Foxp3 2100	chr11	109422006	109422337	WT_specific	Arsg	-17269	TRUE
Foxp3 5287	chr7	108699422	108700143	WT_specific	Art2a-ps	9236	TRUE
Foxp3 4688	chr5	92804263	92805380	WT_specific	Art3	621	TRUE
Foxp3 2815	chr15	64017185	64017894	WT_specific	Asap1	22159	TRUE
Foxp3 2816	chr15	64038261	64038551	WT_specific	Asap1	1502	TRUE
Foxp3 6034	chr15	64042264	64042579	IKcKO_specific	Asap1	-2526	TRUE
Foxp3 2817	chr15	64044178	64044824	WT_specific	Asap1	-4771	TRUE
Foxp3 2818	chr15	64066086	64066474	WT_specific	Asap1	-26421	TRUE
Foxp3 2819	chr15	64066689	64066980	WT_specific	Asap1	-26927	TRUE
Foxp3 2820	chr15	64078031	64078305	WT_specific	Asap1	-38252	TRUE
Foxp3 2318	chr12	104569838	104570739	WT_specific	Asb2	3055	TRUE
Foxp3 2319	chr12	104579143	104579724	WT_specific	Asb2	-3141	TRUE
Foxp3 5443	chr8	87549097	87549322	WT_specific	Asna1	-145	TRUE
Foxp3 4975	chr6	86556398	86557112	WT_specific	Asprv1	21056	TRUE
Foxp3 1903	chr11	79900319	79900713	WT_specific	Atad5	2189	TRUE
Foxp3 5108	chr6	136480382	136480722	WT_specific	Atf7ip	-13350	TRUE
Foxp3 5109	chr6	136481086	136481627	WT_specific	Atf7ip	-14255	TRUE
Foxp3 381	chr7	65932717	65933086	shared	Atp10a	-19514	TRUE
Foxp3 4000	chr3	35664263	35664730	WT_specific	Atp11b	-11674	TRUE
Foxp3 5750	chr9	96294871	96295705	WT_specific	Atp1b3	-30939	TRUE
Foxp3 5751	chr9	96295894	96296249	WT_specific	Atp1b3	-31483	TRUE
Foxp3 5753	chr9	96300040	96300325	WT_specific	Atp1b3	-35559	TRUE
Foxp3 565	chr10	98207397	98208334	shared	Atp2b1	169452	TRUE
Foxp3 1566	chr10	98237406	98237700	WT_specific	Atp2b1	140086	TRUE
Foxp3 1567	chr10	98244505	98245048	WT_specific	Atp2b1	132738	TRUE
Foxp3 5926	chr10	98342832	98343136	IKcKO_specific	Atp2b1	34650	TRUE
Foxp3 34	chr1	135711716	135713648	shared	Atp2b4	-16030	TRUE
Foxp3 3095	chr16	91963852	91964506	WT_specific	Atp5o	-32574	TRUE
Foxp3 3146	chr17	26799349	26800428	WT_specific	Atp6v0e	12913	TRUE
Foxp3 5881	chr1	140144477	140144764	IKcKO_specific	Atp6v1g3	25551	TRUE
Foxp3 41	chr1	140196022	140196846	shared	Atp6v1g3	-26531	TRUE
Foxp3 42	chr1	140199460	140200057	shared	Atp6v1g3	-29742	TRUE
Foxp3 43	chr1	140200512	140201644	shared	Atp6v1g3	-31329	TRUE
Foxp3 1182	chr1	140224053	140224377	WT_specific	Atp6v1g3	-54062	TRUE
Foxp3 1183	chr1	140245094	140245421	WT_specific	Atp6v1g3	-75106	TRUE
Foxp3 2416	chr13	45935350	45935672	WT_specific	Atxn1	124654	TRUE
Foxp3 730	chr13	45945562	45946200	shared	Atxn1	114126	TRUE
Foxp3 731	chr13	45967094	45967435	shared	Atxn1	92891	TRUE
Foxp3 732	chr13	45967517	45968351	shared	Atxn1	91975	TRUE
Foxp3 2418	chr13	45977911	45978846	WT_specific	Atxn1	81480	TRUE
Foxp3 2419	chr13	45979359	45979687	WT_specific	Atxn1	80639	TRUE
Foxp3 733	chr13	45980260	45980700	shared	Atxn1	79626	TRUE
Foxp3 2420	chr13	45984433	45984847	WT_specific	Atxn1	75479	TRUE
Foxp3 2421	chr13	45999091	45999553	WT_specific	Atxn1	60773	TRUE
Foxp3 2422	chr13	46001703	46002733	WT_specific	Atxn1	57593	TRUE
Foxp3 734	chr13	46017985	46019693	shared	Atxn1	40633	TRUE
Foxp3 2423	chr13	46020045	46021026	WT_specific	Atxn1	39300	TRUE
Foxp3 2425	chr13	46027732	46028334	WT_specific	Atxn1	31992	TRUE
Foxp3 2184	chr12	33844779	33845044	WT_specific	Atxn7l1	-12374	TRUE
Foxp3 2185	chr12	33845240	33845665	WT_specific	Atxn7l1	-12995	TRUE
Foxp3 2187	chr12	33857836	33858648	WT_specific	Atxn7l1	-25978	TRUE
Foxp3 2188	chr12	33860414	33860978	WT_specific	Atxn7l1	-28308	TRUE
Foxp3 2189	chr12	33861058	33861397	WT_specific	Atxn7l1	-28727	TRUE
Foxp3 2190	chr12	33866907	33867819	WT_specific	Atxn7l1	-35149	TRUE
Foxp3 677	chr12	33986886	33987379	shared	Atxn7l1	1	TRUE
Foxp3 678	chr12	33987592	33988362	shared	Atxn7l1	-982	TRUE
Foxp3 679	chr12	33999723	34000471	shared	Atxn7l1	-201	TRUE
Foxp3 2191	chr12	34001090	34002150	WT_specific	Atxn7l1	-1880	TRUE
Foxp3 3873	chr2	132433270	132434270	WT_specific	AU019990	-10339	TRUE
Foxp3 140	chr2	132468700	132469596	shared	AU019990	2021	TRUE
Foxp3 2439	chr13	52888682	52889360	WT_specific	Auh	125241	TRUE
Foxp3 2440	chr13	52896446	52896907	WT_specific	Auh	117694	TRUE
Foxp3 740	chr13	52902194	52903809	shared	Auh	110792	TRUE
Foxp3 2443	chr13	52918132	52918622	WT_specific	Auh	95979	TRUE
Foxp3 2444	chr13	52923354	52923817	WT_specific	Auh	90784	TRUE
Foxp3 741	chr13	52924195	52924839	shared	Auh	89762	TRUE
Foxp3 2446	chr13	53017441	53017678	WT_specific	Auh	1535	TRUE
Foxp3 1159	chr1	133509888	133510439	WT_specific	Avpr1b	-14623	TRUE
Foxp3 2089	chr11	108772298	108772660	WT_specific	Axin2	9003	TRUE
Foxp3 6241	chr7	26567337	26567643	IKcKO_specific	Axl	4442	TRUE
Foxp3 3604	chr19	57429832	57430773	WT_specific	B230217O12Rik	4492	TRUE
Foxp3 2453	chr13	55774423	55774819	WT_specific	B230219D22Rik	19666	TRUE
Foxp3 3839	chr2	121973436	121973958	WT_specific	B2m	-536	TRUE
Foxp3 2160	chr11	121516879	121517287	WT_specific	B3gntl1	17180	TRUE
Foxp3 5366	chr7	148233560	148234178	WT_specific	B4galnt4	12995	TRUE
Foxp3 5367	chr7	148234633	148235275	WT_specific	B4galnt4	11898	TRUE
Foxp3 5893	chr1	173192992	173193219	IKcKO_specific	B4galt3	7240	TRUE
Foxp3 3949	chr2	167192317	167193628	WT_specific	B4galt5	-18945	TRUE
Foxp3 3950	chr2	167193925	167194356	WT_specific	B4galt5	-19673	TRUE
Foxp3 1575	chr10	98855175	98855429	WT_specific	B530045E10Rik	27727	TRUE
Foxp3 4311	chr4	32316459	32316729	WT_specific	Bach2	9050	TRUE
Foxp3 4312	chr4	32335281	32335686	WT_specific	Bach2	-947	TRUE
Foxp3 220	chr4	32422055	32423040	shared	Bach2	81370	TRUE
Foxp3 4321	chr4	32429219	32429535	WT_specific	Bach2	74875	TRUE
Foxp3 221	chr4	32430090	32431633	shared	Bach2	72777	TRUE
Foxp3 4322	chr4	32438177	32438547	WT_specific	Bach2	65863	TRUE
Foxp3 4323	chr4	32438811	32439134	WT_specific	Bach2	65276	TRUE
Foxp3 4325	chr4	32450882	32451126	WT_specific	Bach2	53284	TRUE
Foxp3 4326	chr4	32462649	32463074	WT_specific	Bach2	41336	TRUE
Foxp3 4327	chr4	32463330	32463956	WT_specific	Bach2	40454	TRUE
Foxp3 222	chr4	32474400	32475328	shared	Bach2	29082	TRUE
Foxp3 223	chr4	32492379	32493309	shared	Bach2	11101	TRUE
Foxp3 224	chr4	32511208	32512468	shared	Bach2	-8058	TRUE
Foxp3 4329	chr4	32568752	32569160	WT_specific	Bach2	19320	TRUE
Foxp3 6168	chr4	32675236	32675506	IKcKO_specific	Bach2	-13600	TRUE
Foxp3 2158	chr11	120177125	120177452	WT_specific	Bahcc1	-26345	TRUE
Foxp3 2290	chr12	87007038	87007371	WT_specific	Batf	20248	TRUE
Foxp3 3742	chr2	59856944	59857432	WT_specific	Baz2b	-13185	TRUE
Foxp3 3757	chr2	69473253	69473590	WT_specific	Bbs5	11638	TRUE
Foxp3 5553	chr9	22429405	22429948	WT_specific	Bbs9	10161	TRUE
Foxp3 3157	chr17	29417041	29418287	WT_specific	BC004004	737	TRUE
Foxp3 720	chr13	24877814	24878506	shared	BC005537	15020	TRUE
Foxp3 5546	chr9	15335664	15336193	WT_specific	BC017612	-26262	TRUE
Foxp3 3459	chr19	4059091	4060176	WT_specific	BC021614	-881	TRUE
Foxp3 3460	chr19	4061056	4061523	WT_specific	BC021614	-2228	TRUE
Foxp3 3461	chr19	4066325	4066851	WT_specific	BC021614	-7556	TRUE
Foxp3 1515	chr10	81069171	81069534	WT_specific	BC025920	94	TRUE
Foxp3 5896	chr1	182778734	182779149	IKcKO_specific	BC031781	2133	TRUE
Foxp3 3195	chr17	34039402	34039730	WT_specific	BC033916	2350	TRUE
Foxp3 233	chr4	94772038	94774144	shared	BC042782	-8749	TRUE
Foxp3 2457	chr13	60839412	60840025	WT_specific	BC051665	47697	TRUE
Foxp3 4273	chr3	145568198	145568649	WT_specific	Bcl10	18673	TRUE
Foxp3 4274	chr3	145579332	145579636	WT_specific	Bcl10	7686	TRUE
Foxp3 2338	chr12	109230885	109232038	WT_specific	Bcl11b	9586	TRUE
Foxp3 1125	chr1	108584317	108585055	WT_specific	Bcl2	25796	TRUE
Foxp3 141	chr2	152650736	152651461	shared	Bcl2l1	2810	TRUE
Foxp3 3887	chr2	152651615	152651876	WT_specific	Bcl2l1	2395	TRUE
Foxp3 2979	chr16	24151208	24151675	WT_specific	Bcl6	-162737	TRUE
Foxp3 831	chr16	24155477	24155757	shared	Bcl6	-166819	TRUE
Foxp3 5661	chr9	50355797	50356398	WT_specific	Bco2	6888	TRUE
Foxp3 5662	chr9	50356472	50356714	WT_specific	Bco2	6572	TRUE
Foxp3 1	chr1	33940365	33940709	shared	Bend6	-22	TRUE
Foxp3 2991	chr16	32177047	32177594	WT_specific	Bex6	8684	TRUE
Foxp3 6043	chr16	32200357	32200821	IKcKO_specific	Bex6	-14543	TRUE
Foxp3 452	chr9	7829649	7830384	shared	Birc2	4871	TRUE
Foxp3 6279	chr9	7871579	7872414	IKcKO_specific	Birc3	443	TRUE
Foxp3 5244	chr7	87699525	87699805	WT_specific	Blm	-19800	TRUE
Foxp3 4621	chr5	32028595	32028948	WT_specific	Bre	-24725	TRUE
Foxp3 6267	chr8	74061503	74061810	IKcKO_specific	Bst2	-474	TRUE
Foxp3 4434	chr4	116798213	116798775	WT_specific	Btbd19	-512	TRUE
Foxp3 1509	chr10	80121039	80121454	WT_specific	Btbd2	-1638	TRUE
Foxp3 3171	chr17	30696271	30696821	WT_specific	Btbd9	16411	TRUE
Foxp3 562	chr10	95863574	95864064	shared	Btg1	215571	TRUE
Foxp3 1552	chr10	95869137	95870012	WT_specific	Btg1	209623	TRUE
Foxp3 5925	chr10	95872664	95872987	IKcKO_specific	Btg1	206648	TRUE
Foxp3 1555	chr10	96050229	96050601	WT_specific	Btg1	29034	TRUE
Foxp3 563	chr10	96061931	96062610	shared	Btg1	17025	TRUE
Foxp3 564	chr10	96071675	96072495	shared	Btg1	7140	TRUE
Foxp3 1556	chr10	96072808	96073296	WT_specific	Btg1	6339	TRUE
Foxp3 1557	chr10	96088190	96088642	WT_specific	Btg1	-9007	TRUE
Foxp3 1558	chr10	96091322	96091901	WT_specific	Btg1	-12266	TRUE
Foxp3 1559	chr10	96153123	96153825	WT_specific	Btg1	-74190	TRUE
Foxp3 1560	chr10	96156330	96156776	WT_specific	Btg1	-77141	TRUE
Foxp3 1561	chr10	96160083	96160947	WT_specific	Btg1	-81312	TRUE
Foxp3 1563	chr10	96183873	96184420	WT_specific	Btg1	-104785	TRUE
Foxp3 1564	chr10	96187003	96188064	WT_specific	Btg1	-108429	TRUE
Foxp3 1161	chr1	135963743	135964397	WT_specific	Btg2	11300	TRUE
Foxp3 838	chr16	45224167	45224828	shared	Btla	-378	TRUE
Foxp3 628	chr11	58741335	58741947	shared	Btnl10	-10388	TRUE
Foxp3 1907	chr11	80322147	80322521	WT_specific	C030013C21Rik	87	TRUE
Foxp3 5169	chr7	28473862	28474883	WT_specific	C030039L03Rik	-524	TRUE
Foxp3 6207	chr6	7793828	7794049	IKcKO_specific	C1galt1	793	TRUE
Foxp3 2866	chr15	78344632	78345073	WT_specific	C1qtnf6	12684	TRUE
Foxp3 2369	chr13	23522629	23522960	WT_specific	C230035I16Rik	-265	TRUE
Foxp3 2370	chr13	23524443	23524698	WT_specific	C230035I16Rik	-1807	TRUE
Foxp3 4718	chr5	106043125	106043749	WT_specific	C230066G23Rik	-34290	TRUE
Foxp3 4719	chr5	106044749	106045314	WT_specific	C230066G23Rik	-35855	TRUE
Foxp3 3327	chr17	84249773	84250213	WT_specific	C430042M11Rik	3520	TRUE
Foxp3 4970	chr6	86388372	86388761	WT_specific	C87436	-40	TRUE
Foxp3 2929	chr15	98453616	98454223	WT_specific	Cacnb3	8428	TRUE
Foxp3 3731	chr2	52425886	52426676	WT_specific	Cacnb4	-12589	TRUE
Foxp3 3732	chr2	52427018	52427425	WT_specific	Cacnb4	-13338	TRUE
Foxp3 1222	chr1	162177505	162178000	WT_specific	Cacybp	-35092	TRUE
Foxp3 3618	chr2	5563449	5563951	WT_specific	Camk1d	33141	TRUE
Foxp3 4223	chr3	126312398	126312609	WT_specific	Camk2d	-12251	TRUE
Foxp3 2556	chr14	21585122	21585572	WT_specific	Camk2g	27704	TRUE
Foxp3 1614	chr10	118487347	118487814	WT_specific	Cand1	157451	TRUE
Foxp3 1615	chr10	118656537	118656811	WT_specific	Cand1	-7146	TRUE
Foxp3 241	chr4	122548608	122549214	shared	Cap1	-7339	TRUE
Foxp3 4948	chr6	72488940	72489284	WT_specific	Capg	5101	TRUE
Foxp3 328	chr6	72494143	72494772	shared	Capg	-241	TRUE
Foxp3 4949	chr6	72502464	72503240	WT_specific	Capg	-308	TRUE
Foxp3 3303	chr17	73654364	73655462	WT_specific	Capn13	93174	TRUE
Foxp3 4528	chr4	138755148	138756592	WT_specific	Capzb	-1410	TRUE
Foxp3 4809	chr5	141494365	141494774	WT_specific	Card11	-18224	TRUE
Foxp3 6021	chr15	5057707	5057979	IKcKO_specific	Card6	505	TRUE
Foxp3 1026	chr1	58858816	58859119	WT_specific	Casp8	227	TRUE
Foxp3 10	chr1	58859266	58859965	shared	Casp8	-619	TRUE
Foxp3 1027	chr1	58860089	58860426	WT_specific	Casp8	-1080	TRUE
Foxp3 3969	chr2	172218696	172219428	WT_specific	Cass4	-28	TRUE
Foxp3 3970	chr2	172219645	172220370	WT_specific	Cass4	-970	TRUE
Foxp3 3971	chr2	172224871	172225547	WT_specific	Cass4	-6147	TRUE
Foxp3 3972	chr2	172225672	172226140	WT_specific	Cass4	-6740	TRUE
Foxp3 157	chr2	172226610	172227417	shared	Cass4	-8017	TRUE
Foxp3 3039	chr16	52055351	52055881	WT_specific	Cblb	-24162	TRUE
Foxp3 3040	chr16	52060413	52060976	WT_specific	Cblb	-29257	TRUE
Foxp3 3041	chr16	52061618	52062549	WT_specific	Cblb	-30830	TRUE
Foxp3 6051	chr16	52067701	52068052	IKcKO_specific	Cblb	-36333	TRUE
Foxp3 3043	chr16	52143178	52143561	WT_specific	Cblb	9078	TRUE
Foxp3 844	chr16	52147400	52147771	shared	Cblb	4868	TRUE
Foxp3 6265	chr8	63929296	63929774	IKcKO_specific	Cbr4	36757	TRUE
Foxp3 431	chr8	63929948	63930392	shared	Cbr4	36139	TRUE
Foxp3 2878	chr15	79762227	79762411	WT_specific	Cbx7	535	TRUE
Foxp3 4272	chr3	142363115	142363372	WT_specific	Ccbl2	643	TRUE
Foxp3 5334	chr7	133786438	133787064	WT_specific	Ccdc101	5759	TRUE
Foxp3 1449	chr10	59106082	59106646	WT_specific	Ccdc109a	-27206	TRUE
Foxp3 4611	chr5	20916736	20917169	WT_specific	Ccdc146	13326	TRUE
Foxp3 4612	chr5	20917455	20917731	WT_specific	Ccdc146	12764	TRUE
Foxp3 1434	chr10	41334563	41334868	WT_specific	Ccdc162	-27309	TRUE
Foxp3 1435	chr10	41409973	41410632	WT_specific	Ccdc162	18474	TRUE
Foxp3 4432	chr4	116381046	116381382	WT_specific	Ccdc163	-73	TRUE
Foxp3 1279	chr1	174456083	174456405	WT_specific	Ccdc19	-225	TRUE
Foxp3 1490	chr10	69579428	69579847	WT_specific	Ccdc6	-19978	TRUE
Foxp3 1491	chr10	69643581	69643893	WT_specific	Ccdc6	-6098	TRUE
Foxp3 293	chr5	122581510	122581820	shared	Ccdc63	192	TRUE
Foxp3 4758	chr5	122593838	122594081	WT_specific	Ccdc63	-5115	TRUE
Foxp3 294	chr5	122595403	122596838	shared	Ccdc63	-7872	TRUE
Foxp3 4749	chr5	116162166	116162743	WT_specific	Ccdc64	3825	TRUE
Foxp3 4750	chr5	116162924	116163602	WT_specific	Ccdc64	2966	TRUE
Foxp3 4752	chr5	116165666	116166386	WT_specific	Ccdc64	182	TRUE
Foxp3 4753	chr5	116166489	116167940	WT_specific	Ccdc64	-1372	TRUE
Foxp3 5266	chr7	97413758	97414684	WT_specific	Ccdc83	-742	TRUE
Foxp3 4346	chr4	43986639	43986907	WT_specific	Ccin	9469	TRUE
Foxp3 1908	chr11	81991500	81991884	WT_specific	Ccl1	1430	TRUE
Foxp3 6271	chr8	97326423	97326953	IKcKO_specific	Ccl17	7400	TRUE
Foxp3 5460	chr8	97337083	97337500	WT_specific	Ccl17	-3147	TRUE
Foxp3 1924	chr11	83364253	83364908	WT_specific	Ccl5	-20888	TRUE
Foxp3 1668	chr11	6460570	6461910	WT_specific	Ccm2	-773	TRUE
Foxp3 3245	chr17	47644954	47645506	WT_specific	Ccnd3	-3506	TRUE
Foxp3 3246	chr17	47648358	47649141	WT_specific	Ccnd3	-7141	TRUE
Foxp3 3247	chr17	47664546	47664918	WT_specific	Ccnd3	-22918	TRUE
Foxp3 875	chr17	47668146	47669535	shared	Ccnd3	-27535	TRUE
Foxp3 3248	chr17	47670213	47671184	WT_specific	Ccnd3	-29184	TRUE
Foxp3 3249	chr17	47672669	47673021	WT_specific	Ccnd3	-31021	TRUE
Foxp3 6065	chr17	47701359	47701636	IKcKO_specific	Ccnd3	28780	TRUE
Foxp3 4051	chr3	65733982	65734544	WT_specific	Ccnl1	17376	TRUE
Foxp3 513	chr9	123982463	123982854	shared	Ccr2	33835	TRUE
Foxp3 5791	chr9	114405779	114406103	WT_specific	Ccr4	-441	TRUE
Foxp3 5792	chr9	114407583	114407825	WT_specific	Ccr4	-2163	TRUE
Foxp3 5793	chr9	114416560	114416884	WT_specific	Ccr4	-11222	TRUE
Foxp3 1998	chr11	98992087	98992416	WT_specific	Ccr7	23975	TRUE
Foxp3 1999	chr11	98992535	98992932	WT_specific	Ccr7	23459	TRUE
Foxp3 2000	chr11	99011549	99012374	WT_specific	Ccr7	4017	TRUE
Foxp3 652	chr11	99015223	99016912	shared	Ccr7	-521	TRUE
Foxp3 2001	chr11	99024026	99024787	WT_specific	Ccr7	-8396	TRUE
Foxp3 5955	chr11	99024904	99025590	IKcKO_specific	Ccr7	-9199	TRUE
Foxp3 2002	chr11	99028716	99030198	WT_specific	Ccr7	-13807	TRUE
Foxp3 653	chr11	99031839	99032377	shared	Ccr7	-15986	TRUE
Foxp3 5956	chr11	99032433	99032805	IKcKO_specific	Ccr7	-16414	TRUE
Foxp3 2005	chr11	99041014	99041477	WT_specific	Ccr7	-25086	TRUE
Foxp3 2006	chr11	99041726	99042284	WT_specific	Ccr7	-25893	TRUE
Foxp3 509	chr9	119999765	120001321	shared	Ccr8	-70	TRUE
Foxp3 5813	chr9	120005002	120005301	WT_specific	Ccr8	-4050	TRUE
Foxp3 510	chr9	120007989	120008489	shared	Ccr8	-7238	TRUE
Foxp3 1589	chr10	116542069	116542564	WT_specific	Cct2	-41694	TRUE
Foxp3 4158	chr3	100814072	100814682	WT_specific	Cd101	11417	TRUE
Foxp3 4159	chr3	100815838	100816600	WT_specific	Cd101	9499	TRUE
Foxp3 4160	chr3	100825554	100825818	WT_specific	Cd101	281	TRUE
Foxp3 6152	chr3	96616659	96616959	IKcKO_specific	Cd160	1485	TRUE
Foxp3 4168	chr3	101078418	101079563	WT_specific	Cd2	4749	TRUE
Foxp3 4171	chr3	101083104	101084378	WT_specific	Cd2	-66	TRUE
Foxp3 4172	chr3	101084440	101085395	WT_specific	Cd2	-1083	TRUE
Foxp3 4173	chr3	101087472	101088552	WT_specific	Cd2	-4240	TRUE
Foxp3 182	chr3	101089716	101092658	shared	Cd2	-856	TRUE
Foxp3 4175	chr3	101094519	101094985	WT_specific	Cd2	-3123	TRUE
Foxp3 4177	chr3	101099404	101099659	WT_specific	Cd2	-7797	TRUE
Foxp3 4178	chr3	101100139	101100541	WT_specific	Cd2	-8679	TRUE
Foxp3 3022	chr16	44765813	44766254	WT_specific	Cd200r1	-315	TRUE
Foxp3 3023	chr16	44772657	44772928	WT_specific	Cd200r1	-6989	TRUE
Foxp3 3024	chr16	45025506	45025744	WT_specific	Cd200r3	-60377	TRUE
Foxp3 3456	chr18	89328349	89328730	WT_specific	Cd226	38093	TRUE
Foxp3 1268	chr1	173494327	173494845	WT_specific	Cd244	-5389	TRUE
Foxp3 1269	chr1	173496443	173497124	WT_specific	Cd244	-7668	TRUE
Foxp3 57	chr1	167718896	167721067	shared	Cd247	-2171	TRUE
Foxp3 1255	chr1	167767559	167767991	WT_specific	Cd247	20356	TRUE
Foxp3 5059	chr6	125186427	125187720	WT_specific	Cd27	-699	TRUE
Foxp3 5060	chr6	125187799	125189833	WT_specific	Cd27	-2805	TRUE
Foxp3 5061	chr6	125191411	125192055	WT_specific	Cd27	-5027	TRUE
Foxp3 3526	chr19	29441854	29442287	WT_specific	Cd274	-342	TRUE
Foxp3 11	chr1	60802886	60803414	shared	Cd28	-168	TRUE
Foxp3 5861	chr1	60806799	60807255	IKcKO_specific	Cd28	-4009	TRUE
Foxp3 5862	chr1	60812264	60812545	IKcKO_specific	Cd28	-9299	TRUE
Foxp3 5641	chr9	44789871	44790280	WT_specific	Cd3d	-404	TRUE
Foxp3 475	chr9	44792859	44795384	shared	Cd3d	-5508	TRUE
Foxp3 476	chr9	44816316	44818161	shared	Cd3e	-488	TRUE
Foxp3 5640	chr9	44788086	44788762	WT_specific	Cd3g	-248	TRUE
Foxp3 359	chr6	124834932	124835889	shared	Cd4	2328	TRUE
Foxp3 6229	chr6	124848274	124848550	IKcKO_specific	Cd4	-10311	TRUE
Foxp3 3814	chr2	102740988	102741585	WT_specific	Cd44	-82	TRUE
Foxp3 841	chr16	49839700	49840634	shared	Cd47	15097	TRUE
Foxp3 3036	chr16	49936774	49937168	WT_specific	Cd47	-23862	TRUE
Foxp3 3037	chr16	49937429	49937939	WT_specific	Cd47	-24633	TRUE
Foxp3 6050	chr16	49938159	49938502	IKcKO_specific	Cd47	-25196	TRUE
Foxp3 842	chr16	49969900	49970761	shared	Cd47	-57455	TRUE
Foxp3 3489	chr19	10812586	10813338	WT_specific	Cd5	126	TRUE
Foxp3 3490	chr19	10813516	10813880	WT_specific	Cd5	-416	TRUE
Foxp3 4497	chr4	133650427	133651894	WT_specific	Cd52	-941	TRUE
Foxp3 4498	chr4	133652532	133653637	WT_specific	Cd52	-2640	TRUE
Foxp3 4499	chr4	133653720	133655380	WT_specific	Cd52	-4383	TRUE
Foxp3 911	chr19	10856747	10858608	shared	Cd6	8870	TRUE
Foxp3 3495	chr19	10858707	10859220	WT_specific	Cd6	8258	TRUE
Foxp3 3496	chr19	10861917	10862511	WT_specific	Cd6	4967	TRUE
Foxp3 6086	chr19	10892867	10893803	IKcKO_specific	Cd6	10543	TRUE
Foxp3 3498	chr19	10901932	10902761	WT_specific	Cd6	1585	TRUE
Foxp3 3812	chr2	93298842	93299827	WT_specific	Cd82	2242	TRUE
Foxp3 2407	chr13	43845922	43846304	WT_specific	Cd83	34172	TRUE
Foxp3 725	chr13	43869249	43870005	shared	Cd83	10471	TRUE
Foxp3 5988	chr13	43870157	43870750	IKcKO_specific	Cd83	9726	TRUE
Foxp3 1271	chr1	173775245	173775746	WT_specific	Cd84	-4982	TRUE
Foxp3 3007	chr16	36667160	36667875	WT_specific	Cd86	-1708	TRUE
Foxp3 6230	chr6	125432587	125432945	IKcKO_specific	Cd9	-4625	TRUE
Foxp3 5066	chr6	125434076	125434580	WT_specific	Cd9	-6260	TRUE
Foxp3 839	chr16	46119831	46120416	shared	Cd96	-52	TRUE
Foxp3 4526	chr4	136923296	136924400	WT_specific	Cdc42	-10765	TRUE
Foxp3 1806	chr11	54577525	54578038	WT_specific	Cdc42se2	-4197	TRUE
Foxp3 623	chr11	54588280	54588754	shared	Cdc42se2	12373	TRUE
Foxp3 624	chr11	54615262	54616038	shared	Cdc42se2	-14861	TRUE
Foxp3 2963	chr16	18811329	18811717	WT_specific	Cdc45	2	TRUE
Foxp3 555	chr10	92586708	92587370	shared	Cdk17	36251	TRUE
Foxp3 1524	chr10	92607923	92608177	WT_specific	Cdk17	15444	TRUE
Foxp3 1528	chr10	92653391	92654183	WT_specific	Cdk17	16862	TRUE
Foxp3 4602	chr5	3355228	3355824	WT_specific	Cdk6	-11512	TRUE
Foxp3 3320	chr17	80963730	80964005	WT_specific	Cdkl4	-831	TRUE
Foxp3 5098	chr6	134871647	134872215	WT_specific	Cdkn1b	-1796	TRUE
Foxp3 6235	chr6	134897358	134897931	IKcKO_specific	Cdkn1b	-27512	TRUE
Foxp3 3868	chr2	132095078	132095446	WT_specific	Cds2	-6469	TRUE
Foxp3 3869	chr2	132108287	132108815	WT_specific	Cds2	2097	TRUE
Foxp3 5489	chr8	125084956	125085778	WT_specific	Cdt1	6137	TRUE
Foxp3 2394	chr13	35899865	35900137	WT_specific	Cdyl	6480	TRUE
Foxp3 6275	chr8	119162240	119162493	IKcKO_specific	Cdyl2	94398	TRUE
Foxp3 3954	chr2	167505892	167506217	WT_specific	Cebpb	8198	TRUE
Foxp3 2935	chr15	100513275	100513742	WT_specific	Cela1	4609	TRUE
Foxp3 3628	chr2	6643113	6643483	WT_specific	Celf2	-221	TRUE
Foxp3 2909	chr15	85838077	85838537	WT_specific	Celsr1	25670	TRUE
Foxp3 188	chr3	108192023	108192497	shared	Celsr2	2380	TRUE
Foxp3 4685	chr5	86495451	86496142	WT_specific	Cenpc1	-1534	TRUE
Foxp3 1227	chr1	163000470	163001392	WT_specific	Cenpl	-369	TRUE
Foxp3 105	chr2	34987529	34988152	shared	Cep110	-374	TRUE
Foxp3 3893	chr2	155804836	155805576	WT_specific	Cep250	-282	TRUE
Foxp3 5474	chr8	114345210	114345632	WT_specific	Cfdp1	32578	TRUE
Foxp3 1021	chr1	58776670	58777537	WT_specific	Cflar	-7376	TRUE
Foxp3 1022	chr1	58778351	58778652	WT_specific	Cflar	-8491	TRUE
Foxp3 1023	chr1	58783464	58783862	WT_specific	Cflar	3534	TRUE
Foxp3 1024	chr1	58798952	58799274	WT_specific	Cflar	-11878	TRUE
Foxp3 1025	chr1	58799517	58800238	WT_specific	Cflar	-12842	TRUE
Foxp3 3061	chr16	64873288	64874017	WT_specific	Cggbp1	-21489	TRUE
Foxp3 5211	chr7	80676940	80677202	WT_specific	Chd2	5305	TRUE
Foxp3 5212	chr7	80686349	80686640	WT_specific	Chd2	-8	TRUE
Foxp3 5214	chr7	80728331	80728700	WT_specific	Chd2	-42068	TRUE
Foxp3 383	chr7	80729286	80730047	shared	Chd2	-43415	TRUE
Foxp3 5215	chr7	80733115	80733544	WT_specific	Chd2	-46912	TRUE
Foxp3 384	chr7	80733724	80734695	shared	Chd2	-48063	TRUE
Foxp3 4294	chr4	8726172	8726969	WT_specific	Chd7	40500	TRUE
Foxp3 204	chr4	8738189	8738567	shared	Chd7	28902	TRUE
Foxp3 4297	chr4	8765705	8765997	WT_specific	Chd7	1472	TRUE
Foxp3 4298	chr4	8799247	8799585	WT_specific	Chd7	-32116	TRUE
Foxp3 436	chr8	93318957	93319876	shared	Chd9	32858	TRUE
Foxp3 5448	chr8	93478964	93479494	WT_specific	Chd9	-160	TRUE
Foxp3 3820	chr2	112321678	112322164	WT_specific	Chrm5	-1190	TRUE
Foxp3 4661	chr5	66292998	66294557	WT_specific	Chrna9	31603	TRUE
Foxp3 4663	chr5	66309427	66309936	WT_specific	Chrna9	16224	TRUE
Foxp3 4664	chr5	66312456	66313746	WT_specific	Chrna9	12414	TRUE
Foxp3 4665	chr5	66320331	66320899	WT_specific	Chrna9	5261	TRUE
Foxp3 4666	chr5	66341597	66342618	WT_specific	Chrna9	-16404	TRUE
Foxp3 4667	chr5	66346019	66346875	WT_specific	Chrna9	11488	TRUE
Foxp3 277	chr5	66347105	66347480	shared	Chrna9	10883	TRUE
Foxp3 498	chr9	95179213	95180418	shared	Chst2	127271	TRUE
Foxp3 5461	chr8	97352054	97352482	WT_specific	Ciapin1	-1868	TRUE
Foxp3 5166	chr7	26052438	26052859	WT_specific	Cic	-136	TRUE
Foxp3 5771	chr9	107198545	107198811	WT_specific	Cish	-454	TRUE
Foxp3 503	chr9	107200657	107201834	shared	Cish	-348	TRUE
Foxp3 1365	chr10	17441978	17442336	WT_specific	Cited2	698	TRUE
Foxp3 2962	chr16	18733183	18733925	WT_specific	Cldn5	43015	TRUE
Foxp3 6039	chr16	10565645	10565979	IKcKO_specific	Clec16a	-20477	TRUE
Foxp3 2949	chr16	10585133	10585527	WT_specific	Clec16a	15117	TRUE
Foxp3 2950	chr16	10640059	10640339	WT_specific	Clec16a	-10186	TRUE
Foxp3 2951	chr16	10655677	10656336	WT_specific	Clec16a	-26183	TRUE
Foxp3 363	chr6	129130599	129131423	shared	Clec2d	-790	TRUE
Foxp3 362	chr6	128837101	128838185	shared	Clec2i	-569	TRUE
Foxp3 5083	chr6	128838390	128838753	WT_specific	Clec2i	-1137	TRUE
Foxp3 3236	chr17	44398854	44399202	WT_specific	Clic5	-73681	TRUE
Foxp3 5288	chr7	108873360	108873811	WT_specific	Clpb	38282	TRUE
Foxp3 5984	chr13	24507214	24507687	IKcKO_specific	Cmah	-695	TRUE
Foxp3 718	chr13	24508111	24509056	shared	Cmah	-286	TRUE
Foxp3 5122	chr6	142728828	142729143	WT_specific	Cmas	-10657	TRUE
Foxp3 5794	chr9	114651486	114651963	WT_specific	Cmtm6	-11642	TRUE
Foxp3 508	chr9	114696758	114697652	shared	Cmtm7	-6689	TRUE
Foxp3 2475	chr13	93864884	93865633	WT_specific	Cmya5	49046	TRUE
Foxp3 4671	chr5	73025946	73026584	WT_specific	Cnga1	2497	TRUE
Foxp3 278	chr5	73027174	73027626	shared	Cnga1	1455	TRUE
Foxp3 1310	chr1	183228379	183229232	WT_specific	Cnih3	53527	TRUE
Foxp3 1311	chr1	183264661	183265044	WT_specific	Cnih3	17715	TRUE
Foxp3 1333	chr10	3012697	3012940	WT_specific	Cnksr3	121364	TRUE
Foxp3 1334	chr10	3227535	3228093	WT_specific	Cnksr3	-17058	TRUE
Foxp3 4692	chr5	96593028	96593269	WT_specific	Cnot6l	-79	TRUE
Foxp3 116	chr2	65027454	65027919	shared	Cobll1	46133	TRUE
Foxp3 4037	chr3	52681877	52682572	WT_specific	Cog6	138566	TRUE
Foxp3 167	chr3	52733825	52734480	shared	Cog6	86658	TRUE
Foxp3 4359	chr4	47264228	47264956	WT_specific	Col15a1	6451	TRUE
Foxp3 4360	chr4	47285285	47286444	WT_specific	Col15a1	-14716	TRUE
Foxp3 4361	chr4	47287411	47287700	WT_specific	Col15a1	13229	TRUE
Foxp3 4364	chr4	47315586	47316413	WT_specific	Col15a1	181	TRUE
Foxp3 4365	chr4	47332849	47333361	WT_specific	Col15a1	-16767	TRUE
Foxp3 4701	chr5	101051905	101052264	WT_specific	Coq2	41174	TRUE
Foxp3 282	chr5	101065698	101066488	shared	Coq2	26950	TRUE
Foxp3 4704	chr5	101071425	101071984	WT_specific	Coq2	21454	TRUE
Foxp3 283	chr5	101072139	101073326	shared	Coq2	20112	TRUE
Foxp3 5335	chr7	133851244	133851727	WT_specific	Coro1a	-426	TRUE
Foxp3 4352	chr4	46569747	46570214	WT_specific	Coro2a	9098	TRUE
Foxp3 4353	chr4	46573019	46573612	WT_specific	Coro2a	5700	TRUE
Foxp3 4354	chr4	46581179	46581873	WT_specific	Coro2a	-2543	TRUE
Foxp3 4355	chr4	46584200	46584429	WT_specific	Coro2a	-5099	TRUE
Foxp3 4356	chr4	46597854	46598288	WT_specific	Coro2a	16475	TRUE
Foxp3 4358	chr4	46604806	46605791	WT_specific	Coro2a	8972	TRUE
Foxp3 2946	chr16	4673726	4674066	WT_specific	Coro7	5612	TRUE
Foxp3 5484	chr8	122337157	122337641	WT_specific	Cotl1	26781	TRUE
Foxp3 1591	chr10	116854537	116854846	WT_specific	Cpsf6	-37775	TRUE
Foxp3 1332	chr1	196957303	196957719	WT_specific	Cr1l	-220	TRUE
Foxp3 867	chr17	35394835	35395541	shared	CR974466.1	-4557	TRUE
Foxp3 558	chr10	94776187	94776482	shared	Cradd	9839	TRUE
Foxp3 5016	chr6	106743642	106744114	WT_specific	Crbn	4913	TRUE
Foxp3 5096	chr6	134788590	134789381	WT_specific	Crebl2	-9108	TRUE
Foxp3 1900	chr11	79881243	79881517	WT_specific	Crlf3	-10116	TRUE
Foxp3 5245	chr7	87727646	87727963	WT_specific	Crtc3	16059	TRUE
Foxp3 5246	chr7	87728706	87729094	WT_specific	Crtc3	14928	TRUE
Foxp3 3188	chr17	31829693	31830782	WT_specific	Cryaa	-15904	TRUE
Foxp3 3059	chr16	59521735	59522116	WT_specific	Crybg3	3324	TRUE
Foxp3 5671	chr9	57500605	57501127	WT_specific	Csk	-7667	TRUE
Foxp3 3406	chr18	54063154	54063418	WT_specific	Csnk1g3	-41651	TRUE
Foxp3 5809	chr9	119890788	119891187	WT_specific	Csrnp1	-4819	TRUE
Foxp3 1164	chr1	137616267	137617035	WT_specific	Csrp1	-397	TRUE
Foxp3 2274	chr12	81374017	81374686	WT_specific	CT030161.1	61	TRUE
Foxp3 1032	chr1	60909773	60911171	WT_specific	Ctla4	32673	TRUE
Foxp3 1033	chr1	60919777	60920349	WT_specific	Ctla4	23495	TRUE
Foxp3 12	chr1	60965871	60966367	shared	Ctla4	-352	TRUE
Foxp3 5865	chr1	60968162	60968665	IKcKO_specific	Ctla4	-2650	TRUE
Foxp3 1035	chr1	60968998	60969659	WT_specific	Ctla4	-3644	TRUE
Foxp3 1036	chr1	60973414	60973699	WT_specific	Ctla4	-7684	TRUE
Foxp3 1458	chr10	62891391	62891797	WT_specific	Ctnna3	1049	TRUE
Foxp3 1160	chr1	133534585	133535086	WT_specific	Ctse	-15	TRUE
Foxp3 4130	chr3	95315681	95316047	WT_specific	Ctsk	-12839	TRUE
Foxp3 4131	chr3	95321599	95322125	WT_specific	Ctss	8583	TRUE
Foxp3 3652	chr2	13331627	13332046	WT_specific	Cubn	45205	TRUE
Foxp3 3653	chr2	13332277	13332633	WT_specific	Cubn	44618	TRUE
Foxp3 88	chr2	13335253	13336037	shared	Cubn	41214	TRUE
Foxp3 5950	chr11	87920442	87920923	IKcKO_specific	Cuedc1	-8131	TRUE
Foxp3 645	chr11	87958178	87959183	shared	Cuedc1	16580	TRUE
Foxp3 5954	chr11	97627976	97628312	IKcKO_specific	Cwc25	-442	TRUE
Foxp3 3556	chr19	44209811	44210377	WT_specific	Cwf19l1	-11	TRUE
Foxp3 5810	chr9	119963736	119964207	WT_specific	Cx3cr1	13193	TRUE
Foxp3 5876	chr1	130466642	130467176	IKcKO_specific	Cxcr4	21691	TRUE
Foxp3 31	chr1	130508393	130508766	shared	Cxcr4	-19896	TRUE
Foxp3 1139	chr1	130510976	130511550	WT_specific	Cxcr4	-22680	TRUE
Foxp3 471	chr9	44323429	44324427	shared	Cxcr5	10077	TRUE
Foxp3 6289	chr9	44325228	44325713	IKcKO_specific	Cxcr5	8791	TRUE
Foxp3 5625	chr9	44326057	44326698	WT_specific	Cxcr5	7806	TRUE
Foxp3 5628	chr9	44334395	44335166	WT_specific	Cxcr5	-662	TRUE
Foxp3 5629	chr9	44341098	44341816	WT_specific	Cxcr5	-7312	TRUE
Foxp3 5631	chr9	44345485	44346326	WT_specific	Cxcr5	-11822	TRUE
Foxp3 5831	chr9	123723899	123724257	WT_specific	Cxcr6	-8662	TRUE
Foxp3 3455	chr18	85042939	85044393	WT_specific	Cyb5	2600	TRUE
Foxp3 1749	chr11	46088762	46089611	WT_specific	Cyfip2	-5440	TRUE
Foxp3 1750	chr11	46118319	46119579	WT_specific	Cyfip2	6143	TRUE
Foxp3 611	chr11	46140035	46141094	shared	Cyfip2	-15242	TRUE
Foxp3 5447	chr8	91215621	91216143	WT_specific	Cyld	4784	TRUE
Foxp3 3192	chr17	33083966	33084923	WT_specific	Cyp4f13	-587	TRUE
Foxp3 2663	chr14	73448816	73449410	WT_specific	Cysltr2	-489	TRUE
Foxp3 2141	chr11	118073157	118073570	WT_specific	Cyth1	486	TRUE
Foxp3 2142	chr11	118083735	118084291	WT_specific	Cyth1	-3952	TRUE
Foxp3 2143	chr11	118084489	118085325	WT_specific	Cyth1	2968	TRUE
Foxp3 672	chr11	118086765	118087703	shared	Cyth1	590	TRUE
Foxp3 673	chr11	118087804	118088870	shared	Cyth1	-577	TRUE
Foxp3 2144	chr11	118089019	118089986	WT_specific	Cyth1	-1693	TRUE
Foxp3 2145	chr11	118093501	118093898	WT_specific	Cyth1	-5605	TRUE
Foxp3 674	chr11	118093953	118094327	shared	Cyth1	-6034	TRUE
Foxp3 2147	chr11	118097798	118098925	WT_specific	Cyth1	-10632	TRUE
Foxp3 2149	chr11	118100564	118102610	WT_specific	Cyth1	7206	TRUE
Foxp3 2869	chr15	78417919	78418897	WT_specific	Cyth4	8580	TRUE
Foxp3 2870	chr15	78445238	78445549	WT_specific	Cyth4	-18072	TRUE
Foxp3 3734	chr2	57989983	57990457	WT_specific	Cytip	18751	TRUE
Foxp3 112	chr2	58007375	58007938	shared	Cytip	1270	TRUE
Foxp3 3737	chr2	58008034	58008412	WT_specific	Cytip	796	TRUE
Foxp3 113	chr2	58008981	58009366	shared	Cytip	-158	TRUE
Foxp3 3738	chr2	58009506	58009752	WT_specific	Cytip	-544	TRUE
Foxp3 114	chr2	58012156	58012643	shared	Cytip	-113	TRUE
Foxp3 2586	chr14	28218176	28219130	WT_specific	D14Abb1e	22903	TRUE
Foxp3 3071	chr16	78531838	78532211	WT_specific	D16Ertd472e	44691	TRUE
Foxp3 845	chr16	78539988	78541014	shared	D16Ertd472e	35888	TRUE
Foxp3 3072	chr16	78541146	78541464	WT_specific	D16Ertd472e	35438	TRUE
Foxp3 3073	chr16	78547717	78548109	WT_specific	D16Ertd472e	28793	TRUE
Foxp3 3074	chr16	78560284	78560693	WT_specific	D16Ertd472e	16209	TRUE
Foxp3 6053	chr16	78563294	78563723	IKcKO_specific	D16Ertd472e	13179	TRUE
Foxp3 846	chr16	78563884	78564909	shared	D16Ertd472e	11993	TRUE
Foxp3 866	chr17	35136685	35137287	shared	D17H6S56E-5	404	TRUE
Foxp3 860	chr17	27962222	27963055	shared	D17Wsu92e	-5552	TRUE
Foxp3 861	chr17	27963387	27964222	shared	D17Wsu92e	-6719	TRUE
Foxp3 3429	chr18	68169461	68169866	WT_specific	D18Ertd653e	-76955	TRUE
Foxp3 3431	chr18	68211412	68212155	WT_specific	D18Ertd653e	-119244	TRUE
Foxp3 3432	chr18	68212521	68213587	WT_specific	D18Ertd653e	-120676	TRUE
Foxp3 3433	chr18	68218646	68219092	WT_specific	D18Ertd653e	-126181	TRUE
Foxp3 3434	chr18	68349365	68349849	WT_specific	D18Ertd653e	37799	TRUE
Foxp3 3435	chr18	68377878	68378228	WT_specific	D18Ertd653e	9420	TRUE
Foxp3 3436	chr18	68386095	68386511	WT_specific	D18Ertd653e	1137	TRUE
Foxp3 900	chr18	68386804	68388184	shared	D18Ertd653e	-536	TRUE
Foxp3 3564	chr19	46694732	46695675	WT_specific	D19Wsu162e	2216	TRUE
Foxp3 1117	chr1	108466017	108467192	WT_specific	D630008O14Rik	-28672	TRUE
Foxp3 1119	chr1	108497942	108498220	WT_specific	D630008O14Rik	-59700	TRUE
Foxp3 26	chr1	108508357	108509317	shared	D630008O14Rik	-70797	TRUE
Foxp3 27	chr1	108509481	108509795	shared	D630008O14Rik	-71275	TRUE
Foxp3 1120	chr1	108509913	108510286	WT_specific	D630008O14Rik	-71766	TRUE
Foxp3 1121	chr1	108513792	108514295	WT_specific	D630008O14Rik	-75775	TRUE
Foxp3 5870	chr1	108516453	108516780	IKcKO_specific	D630008O14Rik	-78260	TRUE
Foxp3 1712	chr11	31660025	31660623	WT_specific	D630024D03Rik	63850	TRUE
Foxp3 4728	chr5	106268935	106269312	WT_specific	D830014E11Rik	-15782	TRUE
Foxp3 5404	chr8	37227717	37228081	WT_specific	D8Ertd82e	-70166	TRUE
Foxp3 2618	chr14	54858527	54859323	WT_specific	Dad1	14266	TRUE
Foxp3 3741	chr2	59308713	59309073	WT_specific	Dapl1	13637	TRUE
Foxp3 4258	chr3	137613085	137613628	WT_specific	Dapp1	4049	TRUE
Foxp3 4259	chr3	137615381	137616468	WT_specific	Dapp1	1209	TRUE
Foxp3 4260	chr3	137616549	137616814	WT_specific	Dapp1	863	TRUE
Foxp3 4261	chr3	137618477	137618952	WT_specific	Dapp1	-121	TRUE
Foxp3 198	chr3	137644071	137644553	shared	Dapp1	-59	TRUE
Foxp3 3255	chr17	50470740	50471416	WT_specific	Dazl	-38492	TRUE
Foxp3 1128	chr1	121996361	121996744	WT_specific	Dbi	19971	TRUE
Foxp3 2043	chr11	105894783	105895341	WT_specific	Dcaf7	2845	TRUE
Foxp3 5602	chr9	34983390	34983607	WT_specific	Dcps	-29	TRUE
Foxp3 5396	chr8	35146486	35146861	WT_specific	Dctn6	9118	TRUE
Foxp3 1450	chr10	59436828	59438112	WT_specific	Ddit4	-23594	TRUE
Foxp3 869	chr17	35841814	35842509	shared	Ddr1	-943	TRUE
Foxp3 4334	chr4	40185687	40186306	WT_specific	Ddx58	427	TRUE
Foxp3 473	chr9	44375491	44375973	shared	Ddx6	37002	TRUE
Foxp3 5634	chr9	44389674	44389976	WT_specific	Ddx6	22999	TRUE
Foxp3 5635	chr9	44390476	44390906	WT_specific	Ddx6	22069	TRUE
Foxp3 3148	chr17	28348165	28348860	WT_specific	Def6	-4078	TRUE
Foxp3 3149	chr17	28348913	28349624	WT_specific	Def6	-4842	TRUE
Foxp3 3150	chr17	28354497	28355655	WT_specific	Def6	-10873	TRUE
Foxp3 2636	chr14	63546694	63546998	WT_specific	Defb48	56349	TRUE
Foxp3 2637	chr14	63559253	63559887	WT_specific	Defb48	43460	TRUE
Foxp3 4196	chr3	106264606	106265558	WT_specific	Dennd2d	19765	TRUE
Foxp3 4198	chr3	106288431	106289311	WT_specific	Dennd2d	-343	TRUE
Foxp3 5699	chr9	64672215	64672627	WT_specific	Dennd4a	-13276	TRUE
Foxp3 5700	chr9	64673041	64673366	WT_specific	Dennd4a	-14015	TRUE
Foxp3 4396	chr4	86358493	86359024	WT_specific	Dennd4c	35435	TRUE
Foxp3 2784	chr15	57709793	57710226	WT_specific	Derl1	13747	TRUE
Foxp3 1646	chr10	128168153	128168502	WT_specific	Dgka	12610	TRUE
Foxp3 1647	chr10	128182339	128182639	WT_specific	Dgka	-1527	TRUE
Foxp3 1085	chr1	89743006	89744112	WT_specific	Dgkd	5750	TRUE
Foxp3 1086	chr1	89796295	89796724	WT_specific	Dgkd	-46862	TRUE
Foxp3 786	chr14	79098189	79099057	shared	Dgkh	25839	TRUE
Foxp3 2031	chr11	101594025	101594580	WT_specific	Dhx8	-225	TRUE
Foxp3 3392	chr18	38036797	38037111	WT_specific	Diap1	13670	TRUE
Foxp3 825	chr15	99890659	99891734	shared	Dip2b	-22639	TRUE
Foxp3 2604	chr14	48037510	48037844	WT_specific	Dlgap5	238	TRUE
Foxp3 2138	chr11	118007031	118008282	WT_specific	Dnahc17	-17749	TRUE
Foxp3 2139	chr11	118008608	118009801	WT_specific	Dnahc17	-19268	TRUE
Foxp3 2755	chr15	28119451	28119708	WT_specific	Dnahc5	13799	TRUE
Foxp3 6292	chr9	54531826	54532035	IKcKO_specific	Dnaja4	14645	TRUE
Foxp3 1457	chr10	62845042	62845705	WT_specific	Dnajc12	-514	TRUE
Foxp3 545	chr10	62848999	62849633	shared	Dnajc12	-314	TRUE
Foxp3 160	chr3	19329494	19330408	shared	Dnajc5b	78187	TRUE
Foxp3 2012	chr11	100449357	100449884	WT_specific	Dnajc7	2458	TRUE
Foxp3 2013	chr11	100450057	100450478	WT_specific	Dnajc7	1864	TRUE
Foxp3 5957	chr11	100470821	100471748	IKcKO_specific	Dnajc7	2908	TRUE
Foxp3 2550	chr14	8822002	8822255	WT_specific	Dnase1l3	4832	TRUE
Foxp3 2551	chr14	8829819	8830154	WT_specific	Dnase1l3	-3067	TRUE
Foxp3 454	chr9	21240335	21241502	shared	Dnm2	-11814	TRUE
Foxp3 53	chr1	164137386	164137923	shared	Dnm3os	9831	TRUE
Foxp3 3800	chr2	83584701	83585564	WT_specific	Dnmt3l-ps1	329	TRUE
Foxp3 3553	chr19	41105520	41106038	WT_specific	Dntt	-2273	TRUE
Foxp3 1062	chr1	80742208	80742782	WT_specific	Dock10	12346	TRUE
Foxp3 18	chr1	80743239	80743656	shared	Dock10	11472	TRUE
Foxp3 1729	chr11	34551071	34551350	WT_specific	Dock2	46035	TRUE
Foxp3 1730	chr11	34582641	34583200	WT_specific	Dock2	14185	TRUE
Foxp3 608	chr11	34584408	34585258	shared	Dock2	12127	TRUE
Foxp3 609	chr11	34595711	34596262	shared	Dock2	1123	TRUE
Foxp3 3517	chr19	25127076	25127580	WT_specific	Dock8	-53561	TRUE
Foxp3 868	chr17	35772227	35773211	shared	Dpcr1	7429	TRUE
Foxp3 6064	chr17	35773268	35773736	IKcKO_specific	Dpcr1	6904	TRUE
Foxp3 4214	chr3	115636300	115636684	WT_specific	Dph5	-45583	TRUE
Foxp3 3706	chr2	32426212	32426832	WT_specific	Dpm2	-445	TRUE
Foxp3 3751	chr2	62228810	62229283	WT_specific	Dpp4	-12978	TRUE
Foxp3 3752	chr2	62229362	62229691	WT_specific	Dpp4	-13386	TRUE
Foxp3 3753	chr2	62232412	62232794	WT_specific	Dpp4	-16489	TRUE
Foxp3 2649	chr14	67464915	67465125	WT_specific	Dpysl2	22400	TRUE
Foxp3 939	chr1	34062891	34063479	WT_specific	Dst	5191	TRUE
Foxp3 858	chr17	26639727	26640672	shared	Dusp1	3996	TRUE
Foxp3 68	chr1	185811514	185811896	shared	Dusp10	25285	TRUE
Foxp3 1319	chr1	185829074	185829966	WT_specific	Dusp10	7215	TRUE
Foxp3 1320	chr1	185871812	185872162	WT_specific	Dusp10	-13902	TRUE
Foxp3 1321	chr1	185875877	185876163	WT_specific	Dusp10	-17903	TRUE
Foxp3 3797	chr2	80456967	80457772	WT_specific	Dusp19	-349	TRUE
Foxp3 3844	chr2	127139446	127140714	WT_specific	Dusp2	21181	TRUE
Foxp3 135	chr2	127144066	127146037	shared	Dusp2	15858	TRUE
Foxp3 5398	chr8	35685730	35686018	WT_specific	Dusp4	184333	TRUE
Foxp3 5399	chr8	35734525	35735077	WT_specific	Dusp4	135274	TRUE
Foxp3 5400	chr8	35794695	35795369	WT_specific	Dusp4	74982	TRUE
Foxp3 423	chr8	35803713	35804396	shared	Dusp4	65955	TRUE
Foxp3 5401	chr8	35819669	35820108	WT_specific	Dusp4	50243	TRUE
Foxp3 5402	chr8	35859972	35861191	WT_specific	Dusp4	9160	TRUE
Foxp3 3587	chr19	53593599	53594208	WT_specific	Dusp5	9391	TRUE
Foxp3 3588	chr19	53594433	53594883	WT_specific	Dusp5	8716	TRUE
Foxp3 3589	chr19	53609467	53610311	WT_specific	Dusp5	-6712	TRUE
Foxp3 3590	chr19	53610887	53611448	WT_specific	Dusp5	-7849	TRUE
Foxp3 3591	chr19	53613158	53613812	WT_specific	Dusp5	-10213	TRUE
Foxp3 3592	chr19	53619767	53620145	WT_specific	Dusp5	-16546	TRUE
Foxp3 566	chr10	98704114	98705145	shared	Dusp6	20720	TRUE
Foxp3 1573	chr10	98725561	98725935	WT_specific	Dusp6	-70	TRUE
Foxp3 567	chr10	98731046	98732357	shared	Dusp6	-6492	TRUE
Foxp3 1574	chr10	98749421	98749795	WT_specific	Dusp6	-23930	TRUE
Foxp3 5483	chr8	119028523	119029061	WT_specific	Dynlrb2	-146	TRUE
Foxp3 3107	chr16	94810566	94811164	WT_specific	Dyrk1a	-18650	TRUE
Foxp3 3111	chr16	94946111	94946900	WT_specific	Dyrk1a	-56397	TRUE
Foxp3 576	chr10	118319639	118320150	shared	Dyrk2	-14191	TRUE
Foxp3 1613	chr10	118320294	118320749	WT_specific	Dyrk2	-14790	TRUE
Foxp3 4520	chr4	135715772	135716351	WT_specific	E2f2	11958	TRUE
Foxp3 4522	chr4	135719489	135719847	WT_specific	E2f2	8462	TRUE
Foxp3 4523	chr4	135735899	135736658	WT_specific	E2f2	40	TRUE
Foxp3 5187	chr7	56164658	56164927	WT_specific	E2f8	-27961	TRUE
Foxp3 4460	chr4	129591083	129591462	WT_specific	E330017L17Rik	-7785	TRUE
Foxp3 4137	chr3	95525679	95526856	WT_specific	Ecm1	12085	TRUE
Foxp3 5020	chr6	108785432	108786159	WT_specific	Edem1	-7524	TRUE
Foxp3 5021	chr6	108786213	108786733	WT_specific	Edem1	-8098	TRUE
Foxp3 5264	chr7	97190758	97191108	WT_specific	Eed	-61615	TRUE
Foxp3 5073	chr6	127532176	127532949	WT_specific	Efcab4b	-4956	TRUE
Foxp3 4405	chr4	99495695	99496109	WT_specific	Efcab7	-220	TRUE
Foxp3 6254	chr7	89797472	89797903	IKcKO_specific	Eftud1	-752	TRUE
Foxp3 3390	chr18	35014562	35016166	WT_specific	Egr1	3311	TRUE
Foxp3 1463	chr10	66966553	66966848	WT_specific	Egr2	31375	TRUE
Foxp3 2657	chr14	70465238	70466147	WT_specific	Egr3	11105	TRUE
Foxp3 3304	chr17	74163470	74164015	WT_specific	Ehd3	-9834	TRUE
Foxp3 3305	chr17	74171550	74171808	WT_specific	Ehd3	-17627	TRUE
Foxp3 4041	chr3	58321361	58321665	WT_specific	Eif2a	8078	TRUE
Foxp3 327	chr6	70773974	70775333	shared	Eif2ak3	19176	TRUE
Foxp3 2844	chr15	72978916	72979330	WT_specific	Eif2c2	35940	TRUE
Foxp3 808	chr15	72979489	72981321	shared	Eif2c2	33949	TRUE
Foxp3 809	chr15	72981437	72981860	shared	Eif2c2	33410	TRUE
Foxp3 2845	chr15	72983300	72984091	WT_specific	Eif2c2	31179	TRUE
Foxp3 2846	chr15	72984265	72984874	WT_specific	Eif2c2	30396	TRUE
Foxp3 2847	chr15	72985090	72985708	WT_specific	Eif2c2	29562	TRUE
Foxp3 1151	chr1	133078554	133079198	WT_specific	Eif2d	-16242	TRUE
Foxp3 2702	chr14	79931874	79932197	WT_specific	Elf1	-16704	TRUE
Foxp3 2704	chr14	79937270	79937575	WT_specific	Elf1	-22082	TRUE
Foxp3 4008	chr3	51168941	51169993	WT_specific	Elf2	-25413	TRUE
Foxp3 1529	chr10	92724093	92724391	WT_specific	Elk3	49165	TRUE
Foxp3 1530	chr10	92798679	92799360	WT_specific	Elk3	-25480	TRUE
Foxp3 557	chr10	92805831	92806403	shared	Elk3	-32523	TRUE
Foxp3 1532	chr10	92827386	92828468	WT_specific	Elk3	-54588	TRUE
Foxp3 33	chr1	133907476	133908126	shared	Elk4	-3252	TRUE
Foxp3 717	chr13	20275162	20277576	shared	Elmo1	-282	TRUE
Foxp3 4228	chr3	129197123	129197359	WT_specific	Elovl6	37945	TRUE
Foxp3 4229	chr3	129256082	129256454	WT_specific	Elovl6	-21150	TRUE
Foxp3 2544	chr13	117984577	117984995	WT_specific	Emb	24437	TRUE
Foxp3 2545	chr13	117991530	117992431	WT_specific	Emb	17001	TRUE
Foxp3 2547	chr13	117999927	118000702	WT_specific	Emb	8730	TRUE
Foxp3 756	chr13	118004264	118004618	shared	Emb	4814	TRUE
Foxp3 757	chr13	118004695	118005351	shared	Emb	4081	TRUE
Foxp3 588	chr11	5076430	5077607	shared	Emid1	-25347	TRUE
Foxp3 3322	chr17	83765363	83765651	WT_specific	Eml4	-15380	TRUE
Foxp3 6071	chr17	83796873	83797298	IKcKO_specific	Eml4	7245	TRUE
Foxp3 366	chr6	135312364	135313352	shared	Emp1	-403	TRUE
Foxp3 5538	chr9	14152972	14153439	WT_specific	Endod1	32247	TRUE
Foxp3 2923	chr15	97548408	97548721	WT_specific	Endou	2860	TRUE
Foxp3 1402	chr10	24355205	24356252	WT_specific	Enpp1	37812	TRUE
Foxp3 1404	chr10	24370403	24371204	WT_specific	Enpp1	22860	TRUE
Foxp3 1405	chr10	24473915	24474472	WT_specific	Enpp1	-42507	TRUE
Foxp3 427	chr8	48026350	48028446	shared	Enpp6	43833	TRUE
Foxp3 428	chr8	48028606	48029611	shared	Enpp6	42668	TRUE
Foxp3 2882	chr15	80367723	80368175	WT_specific	Enthd1	22725	TRUE
Foxp3 2883	chr15	80369422	80369754	WT_specific	Enthd1	21146	TRUE
Foxp3 818	chr15	80390043	80390942	shared	Enthd1	-42	TRUE
Foxp3 2884	chr15	80402055	80403290	WT_specific	Enthd1	-12390	TRUE
Foxp3 2887	chr15	80420392	80421194	WT_specific	Enthd1	-30294	TRUE
Foxp3 3550	chr19	40734629	40735445	WT_specific	Entpd1	-462	TRUE
Foxp3 3551	chr19	40752690	40753377	WT_specific	Entpd1	2780	TRUE
Foxp3 3552	chr19	40754170	40755147	WT_specific	Entpd1	1010	TRUE
Foxp3 3356	chr17	87178568	87178996	WT_specific	Epas1	-25749	TRUE
Foxp3 4463	chr4	131564350	131564788	WT_specific	Epb4.1	-1435	TRUE
Foxp3 1303	chr1	182917723	182918232	WT_specific	Ephx1	8069	TRUE
Foxp3 5426	chr8	74889211	74889563	WT_specific	Eps15l1	35335	TRUE
Foxp3 2471	chr13	74701481	74702013	WT_specific	Erap1	75307	TRUE
Foxp3 890	chr18	32399574	32400185	shared	Ercc3	-177	TRUE
Foxp3 3530	chr19	29715224	29715881	WT_specific	Ermp1	-1828	TRUE
Foxp3 5112	chr6	136879177	136879506	WT_specific	Erp27	-8805	TRUE
Foxp3 2536	chr13	113988316	113988816	WT_specific	Esm1	11051	TRUE
Foxp3 1337	chr10	5713652	5714038	WT_specific	Esr1	20457	TRUE
Foxp3 1642	chr10	127973360	127974096	WT_specific	Esyt1	-11170	TRUE
Foxp3 5564	chr9	32399255	32399609	WT_specific	Ets1	44197	TRUE
Foxp3 5565	chr9	32399744	32400641	WT_specific	Ets1	43165	TRUE
Foxp3 5566	chr9	32401957	32402386	WT_specific	Ets1	41420	TRUE
Foxp3 5568	chr9	32420475	32420814	WT_specific	Ets1	22992	TRUE
Foxp3 5570	chr9	32423595	32423953	WT_specific	Ets1	19853	TRUE
Foxp3 5571	chr9	32427949	32428877	WT_specific	Ets1	14929	TRUE
Foxp3 457	chr9	32459125	32460106	shared	Ets1	-16300	TRUE
Foxp3 5572	chr9	32468691	32469300	WT_specific	Ets1	-25494	TRUE
Foxp3 6285	chr9	32508658	32509064	IKcKO_specific	Ets1	-5437	TRUE
Foxp3 5573	chr9	32511401	32511702	WT_specific	Ets1	-8075	TRUE
Foxp3 5576	chr9	32516841	32517996	WT_specific	Ets1	-14369	TRUE
Foxp3 459	chr9	32518878	32520818	shared	Ets1	-17191	TRUE
Foxp3 5580	chr9	32526557	32526826	WT_specific	Ets1	-23199	TRUE
Foxp3 460	chr9	32530243	32530679	shared	Ets1	-27052	TRUE
Foxp3 462	chr9	32534208	32534624	shared	Ets1	-30997	TRUE
Foxp3 464	chr9	32538287	32540411	shared	Ets1	-36784	TRUE
Foxp3 465	chr9	32550400	32552844	shared	Ets1	-49217	TRUE
Foxp3 5587	chr9	32557277	32557769	WT_specific	Ets1	-54142	TRUE
Foxp3 5590	chr9	32708834	32709287	WT_specific	Ets1	-205660	TRUE
Foxp3 5591	chr9	32717694	32717991	WT_specific	Ets1	-214364	TRUE
Foxp3 466	chr9	32718209	32719109	shared	Ets1	-215482	TRUE
Foxp3 5593	chr9	32723037	32723789	WT_specific	Ets1	-220162	TRUE
Foxp3 467	chr9	32733253	32734270	shared	Ets1	-230643	TRUE
Foxp3 5599	chr9	32748642	32748910	WT_specific	Ets1	-245283	TRUE
Foxp3 5601	chr9	32867823	32868383	WT_specific	Ets1	-364756	TRUE
Foxp3 853	chr16	95950765	95951111	shared	Ets2	-13650	TRUE
Foxp3 3113	chr16	95971523	95972049	WT_specific	Ets2	-34588	TRUE
Foxp3 2968	chr16	22432076	22432353	WT_specific	Etv5	4234	TRUE
Foxp3 2969	chr16	22466507	22466759	WT_specific	Etv5	-26967	TRUE
Foxp3 5092	chr6	134017268	134017658	WT_specific	Etv6	-31607	TRUE
Foxp3 5095	chr6	134209022	134209202	WT_specific	Etv6	-11619	TRUE
Foxp3 1894	chr11	79340596	79341359	WT_specific	Evi2a	-82	TRUE
Foxp3 2343	chr12	109873979	109874225	WT_specific	Evl	-262	TRUE
Foxp3 2344	chr12	109875677	109876155	WT_specific	Evl	-2192	TRUE
Foxp3 709	chr12	109883893	109884535	shared	Evl	-10572	TRUE
Foxp3 919	chr19	37634369	37634911	shared	Exoc6	-10003	TRUE
Foxp3 4040	chr3	54527660	54528328	WT_specific	Exosc8	5052	TRUE
Foxp3 3929	chr2	165480154	165480456	WT_specific	Eya2	342	TRUE
Foxp3 4473	chr4	132167590	132167900	WT_specific	Eya3	27002	TRUE
Foxp3 4474	chr4	132208820	132209079	WT_specific	Eya3	3536	TRUE
Foxp3 4475	chr4	132215070	132215666	WT_specific	Eya3	-3051	TRUE
Foxp3 2451	chr13	55533786	55535274	WT_specific	F12	-7120	TRUE
Foxp3 2476	chr13	96455639	96455949	WT_specific	F2rl2	10859	TRUE
Foxp3 2477	chr13	96456277	96456609	WT_specific	F2rl2	10199	TRUE
Foxp3 2478	chr13	96466795	96467156	WT_specific	F2rl2	-348	TRUE
Foxp3 2479	chr13	96482532	96482851	WT_specific	F2rl2	-16043	TRUE
Foxp3 1740	chr11	45608413	45608723	WT_specific	F630206G17Rik	12866	TRUE
Foxp3 2182	chr12	33816293	33816718	WT_specific	F730043M19Rik	7768	TRUE
Foxp3 2183	chr12	33816847	33817387	WT_specific	F730043M19Rik	7099	TRUE
Foxp3 5721	chr9	68732531	68732785	WT_specific	F830001A07Rik	-49637	TRUE
Foxp3 4424	chr4	115680245	115681633	WT_specific	Faah	-8960	TRUE
Foxp3 4425	chr4	115682426	115683381	WT_specific	Faah	6899	TRUE
Foxp3 3990	chr3	10205810	10206153	WT_specific	Fabp4	2423	TRUE
Foxp3 5263	chr7	91742492	91743096	WT_specific	Fah	7514	TRUE
Foxp3 5765	chr9	98908802	98909304	WT_specific	Faim	-22512	TRUE
Foxp3 1145	chr1	132760792	132761216	WT_specific	Faim3	1030	TRUE
Foxp3 669	chr11	116283833	116286618	shared	Fam100b	8790	TRUE
Foxp3 4786	chr5	125424447	125425246	WT_specific	Fam101a	58571	TRUE
Foxp3 4787	chr5	125434674	125435163	WT_specific	Fam101a	48654	TRUE
Foxp3 1877	chr11	75851109	75851630	WT_specific	Fam101b	-10346	TRUE
Foxp3 103	chr2	32396803	32397604	shared	Fam102a	-1894	TRUE
Foxp3 3703	chr2	32397760	32398970	WT_specific	Fam102a	-3260	TRUE
Foxp3 3705	chr2	32409594	32410005	WT_specific	Fam102a	-14295	TRUE
Foxp3 2750	chr15	27597551	27598573	WT_specific	Fam105a	12667	TRUE
Foxp3 2752	chr15	27599811	27600336	WT_specific	Fam105a	10904	TRUE
Foxp3 2753	chr15	27713758	27714243	WT_specific	Fam105a	-102981	TRUE
Foxp3 3606	chr2	3620695	3621185	WT_specific	Fam107b	100	TRUE
Foxp3 3607	chr2	3634614	3634835	WT_specific	Fam107b	-4085	TRUE
Foxp3 3608	chr2	3636552	3636836	WT_specific	Fam107b	-6086	TRUE
Foxp3 3609	chr2	3640506	3641547	WT_specific	Fam107b	-10797	TRUE
Foxp3 3610	chr2	3643615	3644313	WT_specific	Fam107b	-13563	TRUE
Foxp3 6099	chr2	3644506	3645201	IKcKO_specific	Fam107b	-14451	TRUE
Foxp3 74	chr2	3647695	3649337	shared	Fam107b	-18587	TRUE
Foxp3 3514	chr19	21788302	21788744	WT_specific	Fam108b	-60945	TRUE
Foxp3 1963	chr11	95216546	95217268	WT_specific	Fam117a	-15992	TRUE
Foxp3 1964	chr11	95217382	95218832	WT_specific	Fam117a	-17556	TRUE
Foxp3 5860	chr1	59953799	59953988	IKcKO_specific	Fam117b	15862	TRUE
Foxp3 1060	chr1	80209809	80210760	WT_specific	Fam124b	-241	TRUE
Foxp3 1194	chr1	153531382	153532305	WT_specific	Fam129a	-8008	TRUE
Foxp3 1197	chr1	153536656	153537001	WT_specific	Fam129a	-12704	TRUE
Foxp3 4607	chr5	3509007	3509612	WT_specific	Fam133b	34232	TRUE
Foxp3 2747	chr15	25829824	25830556	WT_specific	Fam134b	40086	TRUE
Foxp3 4454	chr4	129257440	129257957	WT_specific	Fam167b	-2164	TRUE
Foxp3 6245	chr7	75420326	75420648	IKcKO_specific	Fam169b	233	TRUE
Foxp3 5201	chr7	75420760	75421644	WT_specific	Fam169b	-763	TRUE
Foxp3 5208	chr7	75441376	75442363	WT_specific	Fam169b	2636	TRUE
Foxp3 1108	chr1	97164574	97164997	WT_specific	Fam174a	45208	TRUE
Foxp3 4096	chr3	88997641	88998280	WT_specific	Fam189b	-6374	TRUE
Foxp3 1215	chr1	158682581	158682844	WT_specific	Fam20b	-33712	TRUE
Foxp3 1410	chr10	33830790	33831374	WT_specific	Fam26e	-15049	TRUE
Foxp3 6210	chr6	22281809	22282088	IKcKO_specific	Fam3c	-2632	TRUE
Foxp3 303	chr6	22359061	22359404	shared	Fam3c	-53161	TRUE
Foxp3 4842	chr6	22362250	22362784	WT_specific	Fam3c	-56541	TRUE
Foxp3 4153	chr3	100286090	100286661	WT_specific	Fam46c	6456	TRUE
Foxp3 2813	chr15	63890782	63891111	WT_specific	Fam49b	899	TRUE
Foxp3 2814	chr15	63906679	63906988	WT_specific	Fam49b	-14978	TRUE
Foxp3 803	chr15	63907109	63907808	shared	Fam49b	-15798	TRUE
Foxp3 5361	chr7	139985176	139985550	WT_specific	Fam53b	-6932	TRUE
Foxp3 5362	chr7	139990288	139990727	WT_specific	Fam53b	3706	TRUE
Foxp3 5363	chr7	139996196	139996975	WT_specific	Fam53b	-2528	TRUE
Foxp3 3050	chr16	55888046	55888578	WT_specific	Fam55c	6814	TRUE
Foxp3 3051	chr16	55888699	55889051	WT_specific	Fam55c	6341	TRUE
Foxp3 2373	chr13	24638683	24639115	WT_specific	Fam65b	34943	TRUE
Foxp3 2374	chr13	24639373	24640176	WT_specific	Fam65b	33882	TRUE
Foxp3 2377	chr13	24704919	24705704	WT_specific	Fam65b	775	TRUE
Foxp3 2378	chr13	24706304	24706750	WT_specific	Fam65b	-254	TRUE
Foxp3 2380	chr13	24709320	24709654	WT_specific	Fam65b	-3158	TRUE
Foxp3 2381	chr13	24731394	24731844	WT_specific	Fam65b	-1262	TRUE
Foxp3 4733	chr5	108389736	108390284	WT_specific	Fam69a	11733	TRUE
Foxp3 4734	chr5	108390536	108391233	WT_specific	Fam69a	10784	TRUE
Foxp3 1762	chr11	46212450	46212871	WT_specific	Fam71b	-2810	TRUE
Foxp3 5529	chr9	13698514	13698881	WT_specific	Fam76b	-57734	TRUE
Foxp3 5530	chr9	13699088	13699787	WT_specific	Fam76b	-58640	TRUE
Foxp3 5531	chr9	13708442	13708655	WT_specific	Fam76b	-67508	TRUE
Foxp3 5532	chr9	13814796	13815540	WT_specific	Fam76b	-174393	TRUE
Foxp3 3695	chr2	31933521	31934448	WT_specific	Fam78a	424	TRUE
Foxp3 2894	chr15	80511714	80512516	WT_specific	Fam83f	-10239	TRUE
Foxp3 49	chr1	163696072	163696476	shared	Fasl	21940	TRUE
Foxp3 50	chr1	163696833	163697234	shared	Fasl	21182	TRUE
Foxp3 1233	chr1	163697371	163697672	WT_specific	Fasl	20744	TRUE
Foxp3 5890	chr1	163717988	163718505	IKcKO_specific	Fasl	-89	TRUE
Foxp3 51	chr1	163734414	163735203	shared	Fasl	-16577	TRUE
Foxp3 52	chr1	163739467	163739862	shared	Fasl	-21236	TRUE
Foxp3 1041	chr1	63777155	63777480	WT_specific	Fastkd2	-263	TRUE
Foxp3 5034	chr6	119458082	119458473	WT_specific	Fbxl14	-28787	TRUE
Foxp3 1315	chr1	184299610	184300249	WT_specific	Fbxo28	-28512	TRUE
Foxp3 5740	chr9	77921510	77922130	WT_specific	Fbxo9	10408	TRUE
Foxp3 5283	chr7	108241151	108241582	WT_specific	Fchsd2	15707	TRUE
Foxp3 1259	chr1	172831843	172832173	WT_specific	Fcrlb	10899	TRUE
Foxp3 2786	chr15	58516725	58517628	WT_specific	Fer1l6	-37568	TRUE
Foxp3 3478	chr19	7092082	7092647	WT_specific	Fermt3	1312	TRUE
Foxp3 862	chr17	29530230	29532392	shared	Fgd2	-18946	TRUE
Foxp3 863	chr17	29532577	29533663	shared	Fgd2	-20217	TRUE
Foxp3 864	chr17	29565870	29566966	shared	Fgd2	-53520	TRUE
Foxp3 3159	chr17	29567255	29567605	WT_specific	Fgd2	-54159	TRUE
Foxp3 2429	chr13	49396389	49396919	WT_specific	Fgd3	-2530	TRUE
Foxp3 2430	chr13	49402707	49403197	WT_specific	Fgd3	1412	TRUE
Foxp3 2431	chr13	49403378	49404590	WT_specific	Fgd3	19	TRUE
Foxp3 5388	chr8	26688767	26689764	WT_specific	Fgfr1	-9569	TRUE
Foxp3 4480	chr4	132532722	132533148	WT_specific	Fgr	-117	TRUE
Foxp3 2552	chr14	11284952	11285347	WT_specific	Fhit	625	TRUE
Foxp3 758	chr14	11285509	11286628	shared	Fhit	-656	TRUE
Foxp3 1689	chr11	11688452	11689006	WT_specific	Fignl1	12458	TRUE
Foxp3 3056	chr16	57399627	57400003	WT_specific	Filip1l	-46613	TRUE
Foxp3 3057	chr16	57470524	57470889	WT_specific	Filip1l	78466	TRUE
Foxp3 3151	chr17	28604607	28604984	WT_specific	Fkbp5	18110	TRUE
Foxp3 5158	chr7	17389863	17390229	WT_specific	Fkrp	10249	TRUE
Foxp3 5559	chr9	32302923	32303577	WT_specific	Fli1	45397	TRUE
Foxp3 455	chr9	32306933	32307917	shared	Fli1	41057	TRUE
Foxp3 5560	chr9	32311483	32312143	WT_specific	Fli1	36831	TRUE
Foxp3 456	chr9	32313103	32316025	shared	Fli1	32949	TRUE
Foxp3 5561	chr9	32317130	32317555	WT_specific	Fli1	31419	TRUE
Foxp3 5563	chr9	32326109	32326613	WT_specific	Fli1	22361	TRUE
Foxp3 2035	chr11	103035440	103036809	WT_specific	Fmnl1	-4182	TRUE
Foxp3 97	chr2	30916310	30917833	shared	Fnbp1	-6869	TRUE
Foxp3 98	chr2	30918308	30918697	shared	Fnbp1	-7733	TRUE
Foxp3 3683	chr2	30937998	30938728	WT_specific	Fnbp1	13290	TRUE
Foxp3 3684	chr2	30943179	30943596	WT_specific	Fnbp1	8422	TRUE
Foxp3 3685	chr2	30943668	30944290	WT_specific	Fnbp1	7728	TRUE
Foxp3 3686	chr2	30963772	30964280	WT_specific	Fnbp1	748	TRUE
Foxp3 99	chr2	30971032	30971452	shared	Fnbp1	380	TRUE
Foxp3 100	chr2	30971517	30972587	shared	Fnbp1	-755	TRUE
Foxp3 3687	chr2	30985876	30987233	WT_specific	Fnbp1	10089	TRUE
Foxp3 3690	chr2	30999007	30999409	WT_specific	Fnbp1	-1881	TRUE
Foxp3 5541	chr9	14706081	14707065	WT_specific	Folr4	-101	TRUE
Foxp3 5542	chr9	14707500	14708871	WT_specific	Folr4	-673	TRUE
Foxp3 5543	chr9	14712672	14713069	WT_specific	Folr4	-4674	TRUE
Foxp3 697	chr12	86785604	86786456	shared	Fos	28384	TRUE
Foxp3 2286	chr12	86787687	86788295	WT_specific	Fos	26545	TRUE
Foxp3 2288	chr12	86832820	86833562	WT_specific	Fos	-17701	TRUE
Foxp3 4019	chr3	52002094	52002363	WT_specific	Foxo1	69896	TRUE
Foxp3 4020	chr3	52061756	52062156	WT_specific	Foxo1	10103	TRUE
Foxp3 1437	chr10	41988885	41989726	WT_specific	Foxo3	6776	TRUE
Foxp3 343	chr6	98942887	98943286	shared	Foxp1	10388	TRUE
Foxp3 344	chr6	98977030	98977622	shared	Foxp1	363	TRUE
Foxp3 4993	chr6	99006422	99006886	WT_specific	Foxp1	-12433	TRUE
Foxp3 4994	chr6	99007078	99007445	WT_specific	Foxp1	-12992	TRUE
Foxp3 4997	chr6	99044625	99044962	WT_specific	Foxp1	1237	TRUE
Foxp3 345	chr6	99045156	99045983	shared	Foxp1	216	TRUE
Foxp3 346	chr6	99046037	99046716	shared	Foxp1	-517	TRUE
Foxp3 347	chr6	99210947	99212016	shared	Foxp1	4479	TRUE
Foxp3 5000	chr6	99215633	99216719	WT_specific	Foxp1	-193	TRUE
Foxp3 5001	chr6	99259676	99260148	WT_specific	Foxp1	-43622	TRUE
Foxp3 5010	chr6	99378770	99379155	WT_specific	Foxp1	6184	TRUE
Foxp3 5011	chr6	99379451	99380020	WT_specific	Foxp1	5319	TRUE
Foxp3 5012	chr6	99382176	99383244	WT_specific	Foxp1	2095	TRUE
Foxp3 5013	chr6	99383515	99384041	WT_specific	Foxp1	1298	TRUE
Foxp3 349	chr6	99472519	99473176	shared	Foxp1	-461	TRUE
Foxp3 5832	chrX	7161015	7161396	WT_specific	Foxp3	2039	TRUE
Foxp3 424	chr8	42502220	42502842	shared	Frg1	-370	TRUE
Foxp3 4990	chr6	97242962	97244463	WT_specific	Frmd4b	14216	TRUE
Foxp3 342	chr6	97261219	97262689	shared	Frmd4b	-265	TRUE
Foxp3 4834	chr5	150971059	150971295	WT_specific	Fry	-50053	TRUE
Foxp3 4672	chr5	73543214	73543785	WT_specific	Fryl	-4410	TRUE
Foxp3 4673	chr5	73584959	73585885	WT_specific	Fryl	-2765	TRUE
Foxp3 4674	chr5	73628143	73629418	WT_specific	Fryl	18246	TRUE
Foxp3 4675	chr5	73656375	73657005	WT_specific	Fryl	-9148	TRUE
Foxp3 2046	chr11	106116503	106117089	WT_specific	Ftsj3	21	TRUE
Foxp3 6227	chr6	117887525	117887888	IKcKO_specific	Fxyd4	-535	TRUE
Foxp3 5178	chr7	31818422	31819294	WT_specific	Fxyd5	4771	TRUE
Foxp3 796	chr15	6518528	6520178	shared	Fyb	9693	TRUE
Foxp3 2736	chr15	6524423	6524867	WT_specific	Fyb	5004	TRUE
Foxp3 2737	chr15	6528395	6528771	WT_specific	Fyb	1100	TRUE
Foxp3 2738	chr15	6529132	6529544	WT_specific	Fyb	327	TRUE
Foxp3 2739	chr15	6529895	6530206	WT_specific	Fyb	-314	TRUE
Foxp3 797	chr15	6542277	6542629	shared	Fyb	-7627	TRUE
Foxp3 2740	chr15	6562009	6562299	WT_specific	Fyb	7295	TRUE
Foxp3 2741	chr15	6574449	6575273	WT_specific	Fyb	-5679	TRUE
Foxp3 1413	chr10	39096398	39097541	WT_specific	Fyn	-7932	TRUE
Foxp3 1415	chr10	39122176	39122449	WT_specific	Fyn	17366	TRUE
Foxp3 1416	chr10	39141003	39141355	WT_specific	Fyn	-1540	TRUE
Foxp3 1419	chr10	39175202	39175951	WT_specific	Fyn	-1230	TRUE
Foxp3 5904	chr10	39188681	39189085	IKcKO_specific	Fyn	-14364	TRUE
Foxp3 538	chr10	39189164	39189599	shared	Fyn	-14878	TRUE
Foxp3 1421	chr10	39190259	39191834	WT_specific	Fyn	-17113	TRUE
Foxp3 1422	chr10	39192819	39193113	WT_specific	Fyn	-18392	TRUE
Foxp3 1424	chr10	39198473	39199324	WT_specific	Fyn	-24603	TRUE
Foxp3 539	chr10	39204427	39205235	shared	Fyn	26310	TRUE
Foxp3 540	chr10	39206639	39208039	shared	Fyn	23506	TRUE
Foxp3 1425	chr10	39208748	39209469	WT_specific	Fyn	22076	TRUE
Foxp3 1426	chr10	39224842	39225460	WT_specific	Fyn	6085	TRUE
Foxp3 1427	chr10	39240135	39240359	WT_specific	Fyn	-8814	TRUE
Foxp3 4687	chr5	92522494	92522980	WT_specific	G3bp2	-10219	TRUE
Foxp3 4919	chr6	50756434	50756657	WT_specific	G930045G22Rik	71421	TRUE
Foxp3 4921	chr6	51010460	51010718	WT_specific	G930045G22Rik	-182640	TRUE
Foxp3 4127	chr3	94991699	94992005	WT_specific	Gabpb2	3815	TRUE
Foxp3 1576	chr10	98924062	98924542	WT_specific	Gad1-ps	-18178	TRUE
Foxp3 2300	chr12	99454055	99454323	WT_specific	Galc	27351	TRUE
Foxp3 3309	chr17	80526978	80527597	WT_specific	Galm	-786	TRUE
Foxp3 3310	chr17	80537751	80538812	WT_specific	Galm	5680	TRUE
Foxp3 3311	chr17	80539526	80540104	WT_specific	Galm	4388	TRUE
Foxp3 6070	chr17	80544351	80544836	IKcKO_specific	Galm	-344	TRUE
Foxp3 3312	chr17	80564941	80565305	WT_specific	Galm	-20813	TRUE
Foxp3 3314	chr17	80567704	80568817	WT_specific	Galm	-24325	TRUE
Foxp3 3377	chr18	24337353	24337866	WT_specific	Galnt1	25979	TRUE
Foxp3 2937	chr15	100553829	100554128	WT_specific	Galnt6	-3220	TRUE
Foxp3 3834	chr2	120229911	120230416	WT_specific	Ganc	-342	TRUE
Foxp3 76	chr2	9671235	9671652	shared	Gata3	123647	TRUE
Foxp3 77	chr2	9792650	9793664	shared	Gata3	1635	TRUE
Foxp3 5414	chr8	72509096	72509394	WT_specific	Gatad2a	-11112	TRUE
Foxp3 288	chr5	105668106	105668896	shared	Gbp10	-344	TRUE
Foxp3 4713	chr5	105782434	105783056	WT_specific	Gbp11	-10108	TRUE
Foxp3 4270	chr3	142282577	142282807	WT_specific	Gbp2	759	TRUE
Foxp3 202	chr3	142283448	142283991	shared	Gbp2	-392	TRUE
Foxp3 4271	chr3	142284559	142285021	WT_specific	Gbp2	-1422	TRUE
Foxp3 4269	chr3	142222898	142223201	WT_specific	Gbp3	-62	TRUE
Foxp3 201	chr3	142223551	142224544	shared	Gbp3	-346	TRUE
Foxp3 4709	chr5	105568084	105568961	WT_specific	Gbp4	-356	TRUE
Foxp3 4710	chr5	105569561	105570444	WT_specific	Gbp4	-1839	TRUE
Foxp3 287	chr5	105574158	105574705	shared	Gbp4	-6100	TRUE
Foxp3 4711	chr5	105574903	105575739	WT_specific	Gbp4	-7134	TRUE
Foxp3 199	chr3	142156549	142157361	shared	Gbp5	2503	TRUE
Foxp3 200	chr3	142159775	142160795	shared	Gbp5	-889	TRUE
Foxp3 289	chr5	105722224	105723122	shared	Gbp6	-404	TRUE
Foxp3 4712	chr5	105735187	105735507	WT_specific	Gbp6	-12789	TRUE
Foxp3 4268	chr3	142193368	142193973	WT_specific	Gbp7	-667	TRUE
Foxp3 6197	chr5	105482526	105482956	IKcKO_specific	Gbp8	-376	TRUE
Foxp3 4708	chr5	105491030	105491460	WT_specific	Gbp8	-8880	TRUE
Foxp3 285	chr5	105538848	105540168	shared	Gbp9	-857	TRUE
Foxp3 746	chr13	97726513	97727048	shared	Gcnt4	-32404	TRUE
Foxp3 208	chr4	11648538	11649012	shared	Gem	-16058	TRUE
Foxp3 2404	chr13	43339053	43340013	WT_specific	Gfod1	59528	TRUE
Foxp3 2405	chr13	43345401	43346130	WT_specific	Gfod1	53411	TRUE
Foxp3 723	chr13	43363356	43364811	shared	Gfod1	34730	TRUE
Foxp3 437	chr8	108269924	108270376	shared	Gfod2	12120	TRUE
Foxp3 3147	chr17	27149164	27149475	WT_specific	Ggnbp1	5483	TRUE
Foxp3 1495	chr10	75028437	75029351	WT_specific	Ggt1	-308	TRUE
Foxp3 3719	chr2	35302949	35303570	WT_specific	Ggta1	-2217	TRUE
Foxp3 319	chr6	48682475	48683710	shared	Gimap1	5343	TRUE
Foxp3 320	chr6	48688964	48689381	shared	Gimap1	-275	TRUE
Foxp3 4909	chr6	48718321	48719440	WT_specific	Gimap3	-2922	TRUE
Foxp3 323	chr6	48719580	48722522	shared	Gimap3	-6004	TRUE
Foxp3 317	chr6	48636324	48637744	shared	Gimap4	-3164	TRUE
Foxp3 4908	chr6	48695733	48696129	WT_specific	Gimap5	67	TRUE
Foxp3 321	chr6	48696181	48696705	shared	Gimap5	-507	TRUE
Foxp3 322	chr6	48697027	48697745	shared	Gimap5	-1547	TRUE
Foxp3 4901	chr6	48655107	48656569	WT_specific	Gimap6	-334	TRUE
Foxp3 6213	chr6	48657859	48658437	IKcKO_specific	Gimap6	-240	TRUE
Foxp3 4903	chr6	48668168	48669255	WT_specific	Gimap7	-635	TRUE
Foxp3 318	chr6	48673389	48674112	shared	Gimap7	-5492	TRUE
Foxp3 4905	chr6	48677435	48677826	WT_specific	Gimap7	-9206	TRUE
Foxp3 4906	chr6	48678020	48679028	WT_specific	Gimap7	-10408	TRUE
Foxp3 4890	chr6	48595845	48596309	WT_specific	Gimap8	924	TRUE
Foxp3 314	chr6	48596445	48597883	shared	Gimap8	-523	TRUE
Foxp3 4893	chr6	48625110	48625374	WT_specific	Gimap9	754	TRUE
Foxp3 4894	chr6	48625614	48626742	WT_specific	Gimap9	-614	TRUE
Foxp3 315	chr6	48629407	48630703	shared	Gimap9	-3193	TRUE
Foxp3 331	chr6	87350323	87351024	shared	Gkn3	-12095	TRUE
Foxp3 507	chr9	114349582	114351009	shared	Glb1	-30413	TRUE
Foxp3 5787	chr9	114351521	114352508	WT_specific	Glb1	-31912	TRUE
Foxp3 5789	chr9	114361263	114361810	WT_specific	Glb1	-41214	TRUE
Foxp3 1583	chr10	111433731	111434274	WT_specific	Glipr1	46	TRUE
Foxp3 1584	chr10	111439262	111439899	WT_specific	Glipr1	-212	TRUE
Foxp3 1089	chr1	90371838	90372330	WT_specific	Glrp1	34131	TRUE
Foxp3 23	chr1	90472463	90473407	shared	Glrp1	-66946	TRUE
Foxp3 1091	chr1	90473650	90474854	WT_specific	Glrp1	-68393	TRUE
Foxp3 24	chr1	90480522	90481525	shared	Glrp1	-75064	TRUE
Foxp3 1092	chr1	90483189	90483923	WT_specific	Glrp1	-77462	TRUE
Foxp3 1093	chr1	90484023	90485941	WT_specific	Glrp1	-79480	TRUE
Foxp3 1516	chr10	82129188	82129898	WT_specific	Glt8d2	3315	TRUE
Foxp3 6146	chr3	68566024	68566345	IKcKO_specific	Gm10040	-29286	TRUE
Foxp3 4054	chr3	68582412	68582966	WT_specific	Gm10040	-45907	TRUE
Foxp3 4055	chr3	68587724	68588355	WT_specific	Gm10040	-51296	TRUE
Foxp3 4057	chr3	68590095	68590478	WT_specific	Gm10040	-53419	TRUE
Foxp3 4059	chr3	68593162	68593807	WT_specific	Gm10040	-56748	TRUE
Foxp3 4481	chr4	132634636	132635676	WT_specific	Gm10151	5713	TRUE
Foxp3 4482	chr4	132647308	132647588	WT_specific	Gm10151	-6199	TRUE
Foxp3 3122	chr17	5798157	5798757	WT_specific	Gm10231	17883	TRUE
Foxp3 3123	chr17	5801323	5803873	WT_specific	Gm10231	12767	TRUE
Foxp3 430	chr8	60055043	60055562	shared	Gm10284	-26466	TRUE
Foxp3 4025	chr3	52262248	52262951	WT_specific	Gm10293	153756	TRUE
Foxp3 4026	chr3	52302682	52303049	WT_specific	Gm10293	113658	TRUE
Foxp3 4027	chr3	52303801	52304240	WT_specific	Gm10293	112467	TRUE
Foxp3 166	chr3	52422657	52423400	shared	Gm10293	-6693	TRUE
Foxp3 4028	chr3	52435147	52435799	WT_specific	Gm10293	-19092	TRUE
Foxp3 4029	chr3	52450959	52451812	WT_specific	Gm10293	-35105	TRUE
Foxp3 1447	chr10	59033144	59033377	WT_specific	Gm10322	45434	TRUE
Foxp3 5908	chr10	59041358	59041706	IKcKO_specific	Gm10322	37105	TRUE
Foxp3 1448	chr10	59052582	59052997	WT_specific	Gm10322	25814	TRUE
Foxp3 4179	chr3	101100818	101103312	WT_specific	Gm10355	7690	TRUE
Foxp3 4729	chr5	106273356	106273728	WT_specific	Gm10359	19036	TRUE
Foxp3 1883	chr11	77332538	77333077	WT_specific	Gm10392	-377	TRUE
Foxp3 1317	chr1	184313106	184313686	WT_specific	Gm10517	25465	TRUE
Foxp3 6081	chr18	75614759	75615402	IKcKO_specific	Gm10532	58897	TRUE
Foxp3 1465	chr10	67044221	67044985	WT_specific	Gm10797	-10195	TRUE
Foxp3 1466	chr10	67048325	67048948	WT_specific	Gm10797	-14158	TRUE
Foxp3 1467	chr10	67049030	67049694	WT_specific	Gm10797	-14904	TRUE
Foxp3 1469	chr10	67073082	67073744	WT_specific	Gm10797	-38954	TRUE
Foxp3 1470	chr10	67106306	67106795	WT_specific	Gm10797	-72005	TRUE
Foxp3 1472	chr10	67109183	67109837	WT_specific	Gm10797	-75047	TRUE
Foxp3 1473	chr10	67110458	67111194	WT_specific	Gm10797	-76404	TRUE
Foxp3 3811	chr2	93293121	93293372	WT_specific	Gm10804	-394	TRUE
Foxp3 128	chr2	93293661	93295634	shared	Gm10804	-2656	TRUE
Foxp3 4819	chr5	147717032	147717579	WT_specific	Gm10858	-8853	TRUE
Foxp3 2492	chr13	102428892	102429474	WT_specific	Gm11016	23451	TRUE
Foxp3 5120	chr6	140656480	140656784	WT_specific	Gm11077	21021	TRUE
Foxp3 5121	chr6	140657313	140657667	WT_specific	Gm11077	20138	TRUE
Foxp3 1886	chr11	78413480	78413894	WT_specific	Gm11196	-14837	TRUE
Foxp3 1892	chr11	79179903	79180162	WT_specific	Gm11198	5570	TRUE
Foxp3 4392	chr4	70952385	70952683	WT_specific	Gm11229	-5707	TRUE
Foxp3 2366	chr13	22111806	22112651	WT_specific	Gm11291	-4092	TRUE
Foxp3 2367	chr13	22118302	22118793	WT_specific	Gm11292	-225	TRUE
Foxp3 719	chr13	24691382	24691950	shared	Gm11346	-1029	TRUE
Foxp3 2375	chr13	24695207	24696248	WT_specific	Gm11346	317	TRUE
Foxp3 2376	chr13	24696554	24697363	WT_specific	Gm11346	-798	TRUE
Foxp3 721	chr13	30258218	30258554	shared	Gm11366	15031	TRUE
Foxp3 2385	chr13	30258879	30259241	WT_specific	Gm11366	14344	TRUE
Foxp3 3932	chr2	165743332	165743568	WT_specific	Gm11461	7773	TRUE
Foxp3 3934	chr2	165747252	165748104	WT_specific	Gm11461	3237	TRUE
Foxp3 149	chr2	165780177	165781564	shared	Gm11462	3725	TRUE
Foxp3 6139	chr2	165782176	165782414	IKcKO_specific	Gm11462	2875	TRUE
Foxp3 150	chr2	165807834	165808136	shared	Gm11463	3288	TRUE
Foxp3 151	chr2	165808350	165809334	shared	Gm11463	2090	TRUE
Foxp3 3951	chr2	167345634	167346068	WT_specific	Gm11474	14874	TRUE
Foxp3 641	chr11	86434687	86435210	shared	Gm11478	9318	TRUE
Foxp3 5948	chr11	86437172	86437699	IKcKO_specific	Gm11478	6829	TRUE
Foxp3 1945	chr11	88226081	88226548	WT_specific	Gm11510	20468	TRUE
Foxp3 1967	chr11	96303095	96303555	WT_specific	Gm11529	22306	TRUE
Foxp3 1968	chr11	96316479	96316871	WT_specific	Gm11529	8990	TRUE
Foxp3 1962	chr11	94558834	94559685	WT_specific	Gm11541	6128	TRUE
Foxp3 1039	chr1	61192833	61193127	WT_specific	Gm11590	-12279	TRUE
Foxp3 15	chr1	61196000	61197516	shared	Gm11590	-16668	TRUE
Foxp3 1040	chr1	61197742	61198538	WT_specific	Gm11590	-17690	TRUE
Foxp3 2034	chr11	102434310	102434537	WT_specific	Gm11627	5896	TRUE
Foxp3 2079	chr11	108039666	108040229	WT_specific	Gm11655	2935	TRUE
Foxp3 2080	chr11	108040317	108040987	WT_specific	Gm11655	2177	TRUE
Foxp3 2082	chr11	108076733	108077972	WT_specific	Gm11655	-34808	TRUE
Foxp3 5963	chr11	108083928	108084473	IKcKO_specific	Gm11655	-41309	TRUE
Foxp3 2083	chr11	108084661	108085127	WT_specific	Gm11655	-41963	TRUE
Foxp3 663	chr11	108109415	108110252	shared	Gm11655	-67088	TRUE
Foxp3 2085	chr11	108110392	108111003	WT_specific	Gm11655	-67839	TRUE
Foxp3 2045	chr11	105984213	105984471	WT_specific	Gm11672	4194	TRUE
Foxp3 2092	chr11	109230230	109230554	WT_specific	Gm11696	-5586	TRUE
Foxp3 2116	chr11	115525430	115525890	WT_specific	Gm11702	-7017	TRUE
Foxp3 2118	chr11	115607164	115607493	WT_specific	Gm11704	-16713	TRUE
Foxp3 2119	chr11	115607818	115608322	WT_specific	Gm11704	-17542	TRUE
Foxp3 2066	chr11	106823547	106824011	WT_specific	Gm11707	10393	TRUE
Foxp3 2070	chr11	107232009	107232508	WT_specific	Gm11712	15789	TRUE
Foxp3 659	chr11	107268597	107269560	shared	Gm11713	2144	TRUE
Foxp3 2071	chr11	107272272	107272657	WT_specific	Gm11713	-953	TRUE
Foxp3 660	chr11	107278293	107279308	shared	Gm11713	-7604	TRUE
Foxp3 2075	chr11	107304561	107305612	WT_specific	Gm11714	-16022	TRUE
Foxp3 2076	chr11	107308420	107309286	WT_specific	Gm11714	-19696	TRUE
Foxp3 2126	chr11	116954008	116954383	WT_specific	Gm11730	3958	TRUE
Foxp3 666	chr11	116238458	116239395	shared	Gm11741	4669	TRUE
Foxp3 4293	chr4	8594005	8594460	WT_specific	Gm11809	6269	TRUE
Foxp3 207	chr4	11073987	11074944	shared	Gm11830	-3087	TRUE
Foxp3 209	chr4	32235719	32237190	shared	Gm11928	-429	TRUE
Foxp3 4308	chr4	32240312	32240845	WT_specific	Gm11928	-4084	TRUE
Foxp3 210	chr4	32250723	32252531	shared	Gm11928	-15770	TRUE
Foxp3 4309	chr4	32257394	32258075	WT_specific	Gm11928	-21314	TRUE
Foxp3 211	chr4	32266354	32266805	shared	Gm11929	27318	TRUE
Foxp3 4310	chr4	32266992	32267406	WT_specific	Gm11929	26717	TRUE
Foxp3 213	chr4	32336505	32337784	shared	Gm11932	952	TRUE
Foxp3 214	chr4	32338009	32338574	shared	Gm11932	162	TRUE
Foxp3 216	chr4	32344719	32345431	shared	Gm11932	-6695	TRUE
Foxp3 217	chr4	32345751	32346067	shared	Gm11932	-7331	TRUE
Foxp3 218	chr4	32350172	32351805	shared	Gm11932	-13069	TRUE
Foxp3 4315	chr4	32368207	32368556	WT_specific	Gm11932	-29820	TRUE
Foxp3 4316	chr4	32374644	32374938	WT_specific	Gm11932	-36202	TRUE
Foxp3 219	chr4	32375164	32375835	shared	Gm11932	-37099	TRUE
Foxp3 4318	chr4	32377753	32378206	WT_specific	Gm11932	-39470	TRUE
Foxp3 4319	chr4	32378570	32379474	WT_specific	Gm11932	-40738	TRUE
Foxp3 1654	chr11	4189482	4190048	WT_specific	Gm11958	-4585	TRUE
Foxp3 1662	chr11	6078653	6080095	WT_specific	Gm11969	2942	TRUE
Foxp3 1663	chr11	6080941	6081393	WT_specific	Gm11969	1644	TRUE
Foxp3 1664	chr11	6084453	6084881	WT_specific	Gm11969	-1844	TRUE
Foxp3 1667	chr11	6458973	6459940	WT_specific	Gm11975	-434	TRUE
Foxp3 589	chr11	6579692	6580839	shared	Gm11980	4988	TRUE
Foxp3 1670	chr11	6595327	6595612	WT_specific	Gm11980	-9785	TRUE
Foxp3 1671	chr11	6601061	6601420	WT_specific	Gm11980	-15593	TRUE
Foxp3 1675	chr11	11429029	11429573	WT_specific	Gm11998	27851	TRUE
Foxp3 590	chr11	11457312	11457945	shared	Gm11998	-521	TRUE
Foxp3 1677	chr11	11464144	11464988	WT_specific	Gm11998	-7564	TRUE
Foxp3 591	chr11	11465118	11465646	shared	Gm11998	-8222	TRUE
Foxp3 1681	chr11	11595854	11596416	WT_specific	Gm12000	26	TRUE
Foxp3 1691	chr11	20377282	20378162	WT_specific	Gm12034	-31747	TRUE
Foxp3 5932	chr11	21123249	21123683	IKcKO_specific	Gm12041	3975	TRUE
Foxp3 1697	chr11	21124364	21124717	WT_specific	Gm12041	2941	TRUE
Foxp3 1698	chr11	21353383	21353694	WT_specific	Gm12044	-2337	TRUE
Foxp3 1699	chr11	22531834	22532120	WT_specific	Gm12053	-5453	TRUE
Foxp3 1700	chr11	22592489	22593042	WT_specific	Gm12054	16218	TRUE
Foxp3 601	chr11	22593104	22593891	shared	Gm12054	15369	TRUE
Foxp3 1701	chr11	22610518	22610802	WT_specific	Gm12054	-1542	TRUE
Foxp3 1717	chr11	31961513	31962477	WT_specific	Gm12108	38751	TRUE
Foxp3 1718	chr11	32002972	32003334	WT_specific	Gm12108	-2106	TRUE
Foxp3 610	chr11	43201442	43202200	shared	Gm12148	-3216	TRUE
Foxp3 612	chr11	46157597	46158351	shared	Gm12167	-2562	TRUE
Foxp3 1752	chr11	46162547	46162927	WT_specific	Gm12167	-7138	TRUE
Foxp3 613	chr11	46175626	46176326	shared	Gm12167	-20537	TRUE
Foxp3 616	chr11	48741237	48741722	shared	Gm12185	-1041	TRUE
Foxp3 1772	chr11	48901363	48901837	WT_specific	Gm12188	208	TRUE
Foxp3 1773	chr11	48905734	48906623	WT_specific	Gm12188	-4578	TRUE
Foxp3 1774	chr11	48907707	48908205	WT_specific	Gm12188	-6160	TRUE
Foxp3 1775	chr11	48913689	48914064	WT_specific	Gm12188	-12019	TRUE
Foxp3 1783	chr11	51859490	51859928	WT_specific	Gm12205	-6955	TRUE
Foxp3 5937	chr11	53550670	53551248	IKcKO_specific	Gm12213	-4167	TRUE
Foxp3 1796	chr11	53617575	53618368	WT_specific	Gm12216	-8991	TRUE
Foxp3 620	chr11	53658271	53659661	shared	Gm12216	12985	TRUE
Foxp3 1799	chr11	53664635	53665789	WT_specific	Gm12216	6857	TRUE
Foxp3 1800	chr11	53665864	53666246	WT_specific	Gm12216	6400	TRUE
Foxp3 622	chr11	54539841	54541816	shared	Gm12227	363	TRUE
Foxp3 1816	chr11	54934073	54934782	WT_specific	Gm12231	-2485	TRUE
Foxp3 626	chr11	54944373	54945464	shared	Gm12233	5082	TRUE
Foxp3 1820	chr11	54950418	54950973	WT_specific	Gm12233	-427	TRUE
Foxp3 1822	chr11	57764887	57766315	WT_specific	Gm12245	-3728	TRUE
Foxp3 1823	chr11	57767923	57768688	WT_specific	Gm12245	-6101	TRUE
Foxp3 1824	chr11	57996691	57997285	WT_specific	Gm12250	60	TRUE
Foxp3 1825	chr11	57997403	57997786	WT_specific	Gm12250	-441	TRUE
Foxp3 1826	chr11	58003608	58004182	WT_specific	Gm12250	-2941	TRUE
Foxp3 1827	chr11	58006620	58007116	WT_specific	Gm12250	-5875	TRUE
Foxp3 1850	chr11	67948708	67949133	WT_specific	Gm12304	-39667	TRUE
Foxp3 4336	chr4	40721580	40722053	WT_specific	Gm12396	544	TRUE
Foxp3 225	chr4	40728260	40729583	shared	Gm12396	-6986	TRUE
Foxp3 4154	chr3	100359502	100359935	WT_specific	Gm12474	-66348	TRUE
Foxp3 4155	chr3	100361944	100362318	WT_specific	Gm12474	-68731	TRUE
Foxp3 4156	chr3	100362883	100363521	WT_specific	Gm12474	-69934	TRUE
Foxp3 4166	chr3	101069782	101070260	WT_specific	Gm12490	-5420	TRUE
Foxp3 4367	chr4	55454795	55455518	WT_specific	Gm12505	-23804	TRUE
Foxp3 1748	chr11	46065531	46065803	WT_specific	Gm12568	-8107	TRUE
Foxp3 228	chr4	59273506	59274638	shared	Gm12596	-1715	TRUE
Foxp3 4397	chr4	87691876	87692526	WT_specific	Gm12646	-2818	TRUE
Foxp3 4401	chr4	94863782	94864201	WT_specific	Gm12708	-4148	TRUE
Foxp3 234	chr4	94969705	94970551	shared	Gm12708	-110498	TRUE
Foxp3 239	chr4	107990697	107991646	shared	Gm12740	3297	TRUE
Foxp3 4421	chr4	107991861	107992740	WT_specific	Gm12740	2203	TRUE
Foxp3 236	chr4	100874936	100875414	shared	Gm12785	7778	TRUE
Foxp3 4442	chr4	122588003	122588344	WT_specific	Gm12891	14732	TRUE
Foxp3 242	chr4	122610495	122611105	shared	Gm12891	-8029	TRUE
Foxp3 4431	chr4	116121500	116121735	WT_specific	Gm12950	-342	TRUE
Foxp3 4455	chr4	129438859	129439295	WT_specific	Gm12967	-135	TRUE
Foxp3 4495	chr4	133392933	133393390	WT_specific	Gm12974	-21055	TRUE
Foxp3 4508	chr4	134959771	134960555	WT_specific	Gm12990	-984	TRUE
Foxp3 4509	chr4	134960883	134962362	WT_specific	Gm12990	-2791	TRUE
Foxp3 4517	chr4	135626622	135628004	WT_specific	Gm13009	2883	TRUE
Foxp3 4433	chr4	116797624	116798085	WT_specific	Gm13014	-314	TRUE
Foxp3 4546	chr4	144943369	144943951	WT_specific	Gm13024	36895	TRUE
Foxp3 4568	chr4	150172414	150173119	WT_specific	Gm13049	26723	TRUE
Foxp3 265	chr4	150173347	150173856	shared	Gm13049	25986	TRUE
Foxp3 4570	chr4	150181698	150182728	WT_specific	Gm13049	17114	TRUE
Foxp3 4571	chr4	150183061	150183559	WT_specific	Gm13049	16283	TRUE
Foxp3 4464	chr4	131595590	131596129	WT_specific	Gm13063	7964	TRUE
Foxp3 263	chr4	149913977	149914326	shared	Gm13091	28327	TRUE
Foxp3 264	chr4	149918834	149919357	shared	Gm13091	23296	TRUE
Foxp3 4565	chr4	149930287	149931207	WT_specific	Gm13091	11446	TRUE
Foxp3 4566	chr4	149931795	149932116	WT_specific	Gm13091	10537	TRUE
Foxp3 4567	chr4	149932213	149932776	WT_specific	Gm13091	9877	TRUE
Foxp3 4547	chr4	146872922	146873148	WT_specific	Gm13152	-6622	TRUE
Foxp3 73	chr2	3574808	3576773	shared	Gm13183	21089	TRUE
Foxp3 3613	chr2	3656664	3657220	WT_specific	Gm13185	15229	TRUE
Foxp3 3614	chr2	3666599	3667765	WT_specific	Gm13185	4684	TRUE
Foxp3 3615	chr2	3670719	3671173	WT_specific	Gm13185	1276	TRUE
Foxp3 3616	chr2	3671353	3672082	WT_specific	Gm13185	367	TRUE
Foxp3 3630	chr2	9515492	9515919	WT_specific	Gm13218	3551	TRUE
Foxp3 3631	chr2	9603394	9603820	WT_specific	Gm13218	-84350	TRUE
Foxp3 82	chr2	11260332	11261241	shared	Gm13293	-125	TRUE
Foxp3 3634	chr2	11039754	11040220	WT_specific	Gm13294	-18329	TRUE
Foxp3 3662	chr2	22577064	22577350	WT_specific	Gm13338	-8319	TRUE
Foxp3 75	chr2	6398704	6399949	shared	Gm13391	-6631	TRUE
Foxp3 3626	chr2	6400094	6400489	WT_specific	Gm13391	-7171	TRUE
Foxp3 3699	chr2	32344436	32344935	WT_specific	Gm13412	35616	TRUE
Foxp3 101	chr2	32348323	32349741	shared	Gm13412	30810	TRUE
Foxp3 102	chr2	32349945	32351241	shared	Gm13412	29310	TRUE
Foxp3 3700	chr2	32351366	32352012	WT_specific	Gm13412	28539	TRUE
Foxp3 3702	chr2	32376117	32376426	WT_specific	Gm13412	4125	TRUE
Foxp3 106	chr2	35351148	35351531	shared	Gm13445	-4492	TRUE
Foxp3 3720	chr2	35362225	35363261	WT_specific	Gm13447	-1651	TRUE
Foxp3 104	chr2	34818632	34819111	shared	Gm13450	1313	TRUE
Foxp3 3727	chr2	48328657	48328868	WT_specific	Gm13481	-16103	TRUE
Foxp3 109	chr2	49168584	49169041	shared	Gm13509	-5366	TRUE
Foxp3 3729	chr2	52233962	52234299	WT_specific	Gm13522	7137	TRUE
Foxp3 3730	chr2	52234366	52234826	WT_specific	Gm13522	6610	TRUE
Foxp3 3740	chr2	58021783	58022305	WT_specific	Gm13546	-157	TRUE
Foxp3 3733	chr2	52590448	52590922	WT_specific	Gm13548	7567	TRUE
Foxp3 6116	chr2	58534011	58534586	IKcKO_specific	Gm13558	23594	TRUE
Foxp3 3754	chr2	62278962	62279544	WT_specific	Gm13565	-345	TRUE
Foxp3 3743	chr2	59875431	59875694	WT_specific	Gm13572	-496	TRUE
Foxp3 4001	chr3	37103108	37103506	WT_specific	Gm13621	-3605	TRUE
Foxp3 3767	chr2	70682445	70682722	WT_specific	Gm13633	12024	TRUE
Foxp3 3779	chr2	71983308	71983927	WT_specific	Gm13634	2926	TRUE
Foxp3 3788	chr2	75475827	75476113	WT_specific	Gm13655	-4674	TRUE
Foxp3 3789	chr2	75601294	75601682	WT_specific	Gm13657	13563	TRUE
Foxp3 6124	chr2	83535761	83536282	IKcKO_specific	Gm13686	4991	TRUE
Foxp3 3799	chr2	83540982	83541376	WT_specific	Gm13686	-103	TRUE
Foxp3 3783	chr2	73297261	73297793	WT_specific	Gm13708	-31	TRUE
Foxp3 121	chr2	73301513	73302239	shared	Gm13708	-4477	TRUE
Foxp3 122	chr2	73306938	73307507	shared	Gm13708	-9745	TRUE
Foxp3 123	chr2	73307811	73308635	shared	Gm13708	-10873	TRUE
Foxp3 3784	chr2	73308825	73309241	WT_specific	Gm13708	-11479	TRUE
Foxp3 127	chr2	84345105	84345477	shared	Gm13710	1553	TRUE
Foxp3 1043	chr1	64134895	64135216	WT_specific	Gm13748	-9988	TRUE
Foxp3 4847	chr6	30541963	30542232	WT_specific	Gm13781	-16197	TRUE
Foxp3 4746	chr5	115508860	115509306	WT_specific	Gm13827	-5451	TRUE
Foxp3 4853	chr6	31050064	31050491	WT_specific	Gm13833	2355	TRUE
Foxp3 4854	chr6	31064473	31064836	WT_specific	Gm13833	-11990	TRUE
Foxp3 4848	chr6	31028347	31028810	WT_specific	Gm13834	9102	TRUE
Foxp3 4849	chr6	31029522	31029914	WT_specific	Gm13834	7998	TRUE
Foxp3 4850	chr6	31035775	31036291	WT_specific	Gm13834	1621	TRUE
Foxp3 4857	chr6	31075263	31075516	WT_specific	Gm13835	17125	TRUE
Foxp3 305	chr6	31075753	31076170	shared	Gm13835	16471	TRUE
Foxp3 306	chr6	31076359	31077341	shared	Gm13835	15300	TRUE
Foxp3 4859	chr6	31105885	31106627	WT_specific	Gm13835	-13964	TRUE
Foxp3 4860	chr6	31109404	31109872	WT_specific	Gm13835	-17209	TRUE
Foxp3 4862	chr6	31125815	31126197	WT_specific	Gm13835	-33534	TRUE
Foxp3 4863	chr6	31126253	31126791	WT_specific	Gm13835	-34128	TRUE
Foxp3 132	chr2	117215241	117215805	shared	Gm13982	27628	TRUE
Foxp3 3827	chr2	117242902	117243273	WT_specific	Gm13982	160	TRUE
Foxp3 3829	chr2	117266456	117267089	WT_specific	Gm13982	-23656	TRUE
Foxp3 3830	chr2	117272267	117273036	WT_specific	Gm13982	-29603	TRUE
Foxp3 139	chr2	128253122	128255374	shared	Gm14005	-745	TRUE
Foxp3 3860	chr2	128296102	128296621	WT_specific	Gm14005	-41536	TRUE
Foxp3 3850	chr2	128015597	128016251	WT_specific	Gm14009	-528	TRUE
Foxp3 137	chr2	128192913	128194410	shared	Gm14010	54980	TRUE
Foxp3 138	chr2	128203612	128204030	shared	Gm14010	45360	TRUE
Foxp3 3856	chr2	128205264	128205505	WT_specific	Gm14010	43885	TRUE
Foxp3 3857	chr2	128217608	128218382	WT_specific	Gm14010	31008	TRUE
Foxp3 136	chr2	128119567	128121072	shared	Gm14012	-55693	TRUE
Foxp3 3870	chr2	132335630	132335927	WT_specific	Gm14095	-9043	TRUE
Foxp3 3871	chr2	132338214	132338765	WT_specific	Gm14095	-11881	TRUE
Foxp3 3963	chr2	168298962	168299228	WT_specific	Gm14234	-55154	TRUE
Foxp3 3927	chr2	164357245	164357516	WT_specific	Gm14317	18514	TRUE
Foxp3 3543	chr19	34671641	34672110	WT_specific	Gm14446	1707	TRUE
Foxp3 3793	chr2	78812799	78813213	WT_specific	Gm14466	50215	TRUE
Foxp3 3983	chr2	174758356	174758776	WT_specific	Gm14616	-76986	TRUE
Foxp3 926	chrX	39696514	39696878	shared	Gm14619	3811	TRUE
Foxp3 3977	chr2	173274006	173274593	WT_specific	Gm14642	-54526	TRUE
Foxp3 3978	chr2	173274741	173275099	WT_specific	Gm14642	-55032	TRUE
Foxp3 158	chr2	173277597	173277934	shared	Gm14642	-57867	TRUE
Foxp3 5369	chr7	150193501	150194654	WT_specific	Gm15024	-716	TRUE
Foxp3 4923	chr6	52220287	52220712	WT_specific	Gm15053	-7934	TRUE
Foxp3 6258	chr7	111463435	111463792	IKcKO_specific	Gm15133	-258	TRUE
Foxp3 2337	chr12	109054764	109055072	WT_specific	Gm15208	-32821	TRUE
Foxp3 5848	chrX	163543924	163544295	WT_specific	Gm15232	-4273	TRUE
Foxp3 2517	chr13	112773504	112774721	WT_specific	Gm15322	6953	TRUE
Foxp3 2518	chr13	112791268	112792230	WT_specific	Gm15323	3480	TRUE
Foxp3 2519	chr13	112792782	112794022	WT_specific	Gm15323	1688	TRUE
Foxp3 3395	chr18	39180273	39180721	WT_specific	Gm15334	-26875	TRUE
Foxp3 3415	chr18	56915741	56916643	WT_specific	Gm15345	12728	TRUE
Foxp3 4829	chr5	149643316	149644249	WT_specific	Gm15407	-11906	TRUE
Foxp3 1231	chr1	163664919	163665524	WT_specific	Gm15429	-7904	TRUE
Foxp3 1232	chr1	163680846	163681175	WT_specific	Gm15429	-23555	TRUE
Foxp3 4143	chr3	96351489	96352073	WT_specific	Gm15441	9665	TRUE
Foxp3 4144	chr3	96360343	96360759	WT_specific	Gm15441	979	TRUE
Foxp3 4147	chr3	96370780	96371525	WT_specific	Gm15441	-801	TRUE
Foxp3 4184	chr3	103605539	103606153	WT_specific	Gm15471	899	TRUE
Foxp3 183	chr3	103606806	103607204	shared	Gm15471	-145	TRUE
Foxp3 4187	chr3	103666466	103666955	WT_specific	Gm15472	134	TRUE
Foxp3 6211	chr6	37664525	37664873	IKcKO_specific	Gm15487	91213	TRUE
Foxp3 4872	chr6	37771839	37772819	WT_specific	Gm15487	-16733	TRUE
Foxp3 5275	chr7	105841535	105841789	WT_specific	Gm15506	9649	TRUE
Foxp3 4623	chr5	34552679	34553269	WT_specific	Gm15513	3182	TRUE
Foxp3 3029	chr16	49774038	49774953	WT_specific	Gm15518	24030	TRUE
Foxp3 3030	chr16	49775041	49776082	WT_specific	Gm15518	22901	TRUE
Foxp3 3031	chr16	49796512	49797864	WT_specific	Gm15518	1119	TRUE
Foxp3 3032	chr16	49798721	49799392	WT_specific	Gm15518	-409	TRUE
Foxp3 3011	chr16	38653346	38653731	WT_specific	Gm15530	32251	TRUE
Foxp3 5136	chr6	145135961	145136267	WT_specific	Gm15543	-5472	TRUE
Foxp3 5137	chr6	145141533	145141911	WT_specific	Gm15543	-11116	TRUE
Foxp3 5138	chr6	145142043	145142417	WT_specific	Gm15543	-11622	TRUE
Foxp3 4224	chr3	126353294	126353725	WT_specific	Gm15551	18225	TRUE
Foxp3 194	chr3	126353986	126354757	shared	Gm15551	17193	TRUE
Foxp3 195	chr3	126362731	126363855	shared	Gm15551	8095	TRUE
Foxp3 4226	chr3	126363986	126364783	WT_specific	Gm15551	7167	TRUE
Foxp3 2952	chr16	10664648	10665285	WT_specific	Gm15558	18347	TRUE
Foxp3 2953	chr16	10666072	10666554	WT_specific	Gm15558	17078	TRUE
Foxp3 2955	chr16	10683328	10684191	WT_specific	Gm15558	-559	TRUE
Foxp3 6040	chr16	10702828	10703099	IKcKO_specific	Gm15558	-19467	TRUE
Foxp3 2956	chr16	10724121	10724603	WT_specific	Gm15558	-40971	TRUE
Foxp3 5816	chr9	120248315	120249876	WT_specific	Gm15566	-24430	TRUE
Foxp3 2340	chr12	109691570	109692282	WT_specific	Gm15636	-12802	TRUE
Foxp3 3010	chr16	38321701	38322012	WT_specific	Gm15649	-19310	TRUE
Foxp3 1956	chr11	88829509	88829812	WT_specific	Gm15698	-1567	TRUE
Foxp3 5140	chr6	145906129	145906630	WT_specific	Gm15705	-576	TRUE
Foxp3 5142	chr6	145940509	145941833	WT_specific	Gm15705	-35779	TRUE
Foxp3 2987	chr16	32108219	32108631	WT_specific	Gm15729	320	TRUE
Foxp3 2988	chr16	32110674	32111232	WT_specific	Gm15729	-2281	TRUE
Foxp3 2989	chr16	32113382	32114250	WT_specific	Gm15729	-5299	TRUE
Foxp3 6020	chr14	123351315	123351510	IKcKO_specific	Gm15735	-169	TRUE
Foxp3 2427	chr13	46435381	46435678	WT_specific	Gm1574	-66588	TRUE
Foxp3 291	chr5	118928136	118928866	shared	Gm15754	23983	TRUE
Foxp3 4681	chr5	77559126	77560417	WT_specific	Gm15831	-9044	TRUE
Foxp3 6194	chr5	77573474	77573819	IKcKO_specific	Gm15831	-22446	TRUE
Foxp3 1326	chr1	195014884	195015945	WT_specific	Gm15872	-2376	TRUE
Foxp3 1327	chr1	195016072	195017180	WT_specific	Gm15872	-3611	TRUE
Foxp3 5247	chr7	87779837	87780643	WT_specific	Gm15880	260	TRUE
Foxp3 5249	chr7	87788312	87788782	WT_specific	Gm15880	-7879	TRUE
Foxp3 4183	chr3	103576771	103577036	WT_specific	Gm15886	-805	TRUE
Foxp3 5450	chr8	96889239	96889993	WT_specific	Gm15889	11828	TRUE
Foxp3 5451	chr8	96896195	96896948	WT_specific	Gm15889	4873	TRUE
Foxp3 1944	chr11	87872831	87873090	WT_specific	Gm15892	-522	TRUE
Foxp3 6031	chr15	58025816	58026623	IKcKO_specific	Gm15943	19407	TRUE
Foxp3 3109	chr16	94822571	94823050	WT_specific	Gm15971	18934	TRUE
Foxp3 4739	chr5	111486141	111486535	WT_specific	Gm15988	-48670	TRUE
Foxp3 4740	chr5	111487384	111488296	WT_specific	Gm15988	-50431	TRUE
Foxp3 4598	chr4	155404228	155404728	WT_specific	Gm16008	1003	TRUE
Foxp3 4599	chr4	155404813	155405448	WT_specific	Gm16008	283	TRUE
Foxp3 4601	chr4	155406329	155407705	WT_specific	Gm16008	-1953	TRUE
Foxp3 2331	chr12	108383244	108383711	WT_specific	Gm16084	14706	TRUE
Foxp3 707	chr12	108383805	108386369	shared	Gm16084	12048	TRUE
Foxp3 2332	chr12	108397519	108397893	WT_specific	Gm16084	524	TRUE
Foxp3 2333	chr12	108398115	108398897	WT_specific	Gm16084	-480	TRUE
Foxp3 2325	chr12	108356937	108357579	WT_specific	Gm16085	10312	TRUE
Foxp3 5982	chr12	108364562	108364961	IKcKO_specific	Gm16085	2930	TRUE
Foxp3 2326	chr12	108365641	108366415	WT_specific	Gm16085	1476	TRUE
Foxp3 702	chr12	108372491	108373356	shared	Gm16085	-5465	TRUE
Foxp3 703	chr12	108376725	108377219	shared	Gm16085	-9328	TRUE
Foxp3 704	chr12	108377271	108378007	shared	Gm16085	-10116	TRUE
Foxp3 706	chr12	108379110	108379456	shared	Gm16085	-11565	TRUE
Foxp3 197	chr3	135168272	135168646	shared	Gm16100	-10029	TRUE
Foxp3 4248	chr3	135168711	135169074	WT_specific	Gm16100	-10457	TRUE
Foxp3 3369	chr18	5610187	5610740	WT_specific	Gm16147	1094	TRUE
Foxp3 5202	chr7	75422980	75423726	WT_specific	Gm16157	-2246	TRUE
Foxp3 5203	chr7	75423853	75424868	WT_specific	Gm16157	-3388	TRUE
Foxp3 5205	chr7	75427243	75427797	WT_specific	Gm16157	-6317	TRUE
Foxp3 5207	chr7	75431004	75431885	WT_specific	Gm16157	-10405	TRUE
Foxp3 5209	chr7	75514616	75515031	WT_specific	Gm16158	-16944	TRUE
Foxp3 1765	chr11	48668796	48670157	WT_specific	Gm16170	-3162	TRUE
Foxp3 3155	chr17	29218502	29218934	WT_specific	Gm16197	-3028	TRUE
Foxp3 5365	chr7	147135573	147137326	WT_specific	Gm16201	-987	TRUE
Foxp3 4277	chr3	152568802	152569206	WT_specific	Gm16213	13998	TRUE
Foxp3 4278	chr3	152574642	152575571	WT_specific	Gm16213	7633	TRUE
Foxp3 4279	chr3	152575674	152576460	WT_specific	Gm16213	6744	TRUE
Foxp3 4280	chr3	152580817	152581124	WT_specific	Gm16213	2080	TRUE
Foxp3 4281	chr3	152582149	152582699	WT_specific	Gm16213	505	TRUE
Foxp3 4282	chr3	152582858	152583275	WT_specific	Gm16213	-71	TRUE
Foxp3 4283	chr3	152592257	152593846	WT_specific	Gm16213	-10642	TRUE
Foxp3 5613	chr9	41841502	41842047	WT_specific	Gm16214	-11349	TRUE
Foxp3 6181	chr4	134636183	134636392	IKcKO_specific	Gm16225	39970	TRUE
Foxp3 4505	chr4	134658324	134658826	WT_specific	Gm16225	17536	TRUE
Foxp3 4506	chr4	134660198	134660721	WT_specific	Gm16225	15641	TRUE
Foxp3 281	chr5	99928684	99929222	shared	Gm16227	10479	TRUE
Foxp3 4284	chr3	152604364	152604948	WT_specific	Gm16231	1329	TRUE
Foxp3 4286	chr3	152620907	152621641	WT_specific	Gm16231	-15364	TRUE
Foxp3 5505	chr8	127861466	127861887	WT_specific	Gm16237	-110664	TRUE
Foxp3 1497	chr10	75769596	75770028	WT_specific	Gm16240	-14118	TRUE
Foxp3 4148	chr3	96379789	96380773	WT_specific	Gm16253	134	TRUE
Foxp3 3769	chr2	71482031	71482634	WT_specific	Gm1631	74840	TRUE
Foxp3 874	chr17	44705777	44706894	shared	Gm16317	-7955	TRUE
Foxp3 5378	chr8	14961268	14961774	WT_specific	Gm16350	-188	TRUE
Foxp3 5019	chr6	108481599	108481930	WT_specific	Gm16433	33652	TRUE
Foxp3 350	chr6	108486529	108487399	shared	Gm16433	28183	TRUE
Foxp3 351	chr6	108499008	108499956	shared	Gm16433	15626	TRUE
Foxp3 6225	chr6	108503696	108503977	IKcKO_specific	Gm16433	11605	TRUE
Foxp3 3694	chr2	31917813	31918112	WT_specific	Gm16534	1572	TRUE
Foxp3 1250	chr1	167710270	167711364	WT_specific	Gm16565	-158	TRUE
Foxp3 840	chr16	49800208	49800661	shared	Gm16619	-15	TRUE
Foxp3 3033	chr16	49801221	49801776	WT_specific	Gm16619	-1130	TRUE
Foxp3 3034	chr16	49801951	49802343	WT_specific	Gm16619	-1697	TRUE
Foxp3 6049	chr16	49807228	49807537	IKcKO_specific	Gm16619	-6891	TRUE
Foxp3 3035	chr16	49807616	49807936	WT_specific	Gm16619	-7290	TRUE
Foxp3 70	chr1	193909968	193911063	shared	Gm16621	5190	TRUE
Foxp3 3280	chr17	71274109	71274402	WT_specific	Gm16627	-66	TRUE
Foxp3 425	chr8	47772182	47772632	shared	Gm16675	52237	TRUE
Foxp3 6264	chr8	47799642	47800153	IKcKO_specific	Gm16675	24716	TRUE
Foxp3 633	chr11	79856258	79857180	shared	Gm16706	-13810	TRUE
Foxp3 2436	chr13	52059796	52060274	WT_specific	Gm16767	8309	TRUE
Foxp3 2437	chr13	52064758	52065770	WT_specific	Gm16767	2813	TRUE
Foxp3 1389	chr10	20819546	20819927	WT_specific	Gm16786	44973	TRUE
Foxp3 4078	chr3	83601756	83602167	WT_specific	Gm16790	-8289	TRUE
Foxp3 1176	chr1	138581153	138582624	WT_specific	Gm16880	10164	TRUE
Foxp3 967	chr1	40142328	40142930	WT_specific	Gm16894	-232	TRUE
Foxp3 929	chr1	7387063	7387478	WT_specific	Gm16899	404	TRUE
Foxp3 3166	chr17	29637076	29637806	WT_specific	Gm16912	-8936	TRUE
Foxp3 3167	chr17	29637885	29639202	WT_specific	Gm16912	-10332	TRUE
Foxp3 3276	chr17	71078116	71078402	WT_specific	Gm16952	26520	TRUE
Foxp3 1788	chr11	52079431	52080220	WT_specific	Gm16953	2796	TRUE
Foxp3 2304	chr12	100878195	100878974	WT_specific	Gm16956	-76923	TRUE
Foxp3 5829	chr9	123663590	123664020	WT_specific	Gm17020	7601	TRUE
Foxp3 2324	chr12	107547234	107547746	WT_specific	Gm17032	17832	TRUE
Foxp3 502	chr9	107200012	107200573	shared	Gm17040	-1050	TRUE
Foxp3 5772	chr9	107214837	107215199	WT_specific	Gm17041	-11030	TRUE
Foxp3 5773	chr9	107215304	107216184	WT_specific	Gm17041	-12015	TRUE
Foxp3 2825	chr15	66597316	66597951	WT_specific	Gm17140	-22062	TRUE
Foxp3 5439	chr8	84309202	84309682	WT_specific	Gm17169	5125	TRUE
Foxp3 2600	chr14	45660922	45661886	WT_specific	Gm17173	-35311	TRUE
Foxp3 6007	chr14	45669249	45669580	IKcKO_specific	Gm17173	-43005	TRUE
Foxp3 767	chr14	45669899	45670469	shared	Gm17173	-43894	TRUE
Foxp3 928	chrX	163098923	163099572	shared	Gm1720	385	TRUE
Foxp3 2397	chr13	41468129	41468915	WT_specific	Gm17260	-13575	TRUE
Foxp3 896	chr18	55020229	55020573	shared	Gm17270	120516	TRUE
Foxp3 3407	chr18	55126232	55126628	WT_specific	Gm17270	14461	TRUE
Foxp3 1521	chr10	87868046	87868533	WT_specific	Gm17338	-22077	TRUE
Foxp3 3643	chr2	11539411	11540484	WT_specific	Gm17355	6483	TRUE
Foxp3 3644	chr2	11542134	11542456	WT_specific	Gm17355	4511	TRUE
Foxp3 3133	chr17	21610424	21611160	WT_specific	Gm17372	14679	TRUE
[truncated: 2,687 more rows]
